# Supplementary material
Source: HighWire-hosted journal article supplement (doi:10.1101/rna.080188.124)
Supplement: Supplemental_Table_S1.xlsx [file Supplemental_Table_S1.xlsx]

## Sheet: Table_S1_v43_v_XIST_rpvals_comb
geneID	XIST_rval	XIST_pval	XIST_adjpval
ENST00000429829.6|ENSG00000229807.13|OTTHUMG00000021839.13|OTTHUMT00000057239.2|XIST-204|XIST|19245|	0.999911	0	0
ENST00000626826.1|ENSG00000281344.1|OTTHUMG00000189570.1|OTTHUMT00000479989.1|HELLPAR-201|HELLPAR|205012|	0.475998	0	0
ENST00000570269.2|ENSG00000259976.3|OTTHUMG00000175755.2|OTTHUMT00000431034.2|ENST00000570269|ENSG00000259976|15214|	0.359487	7.62757e-12	3.95362e-08
ENST00000663028.1|ENSG00000286473.1|OTTHUMG00000195348.1|OTTHUMT00000526484.1|ENST00000663028|ENSG00000286473|6197|	0.343834	4.31076e-11	1.67581e-07
ENST00000623833.1|ENSG00000279717.1|OTTHUMG00000186034.1|OTTHUMT00000472098.1|ENST00000623833|ENSG00000279717|2679|	0.329901	1.93838e-10	6.02836e-07
ENST00000648200.2|ENSG00000203930.13|OTTHUMG00000022548.18|OTTHUMT00000498173.3|LINC00632-210|LINC00632|21234|	0.326995	2.63962e-10	6.84102e-07
ENST00000562952.1|ENSG00000261654.1|OTTHUMG00000175996.1|OTTHUMT00000431363.1|ENST00000562952|ENSG00000261654|5985|	0.325163	3.20447e-10	7.0809e-07
ENST00000617901.1|ENSG00000277151.1|OTTHUMG00000187329.1|OTTHUMT00000474773.1|ENST00000617901|ENSG00000277151|5305|	0.323948	3.6429e-10	7.0809e-07
ENST00000430027.3|ENSG00000231764.11|OTTHUMG00000154198.11|OTTHUMT00000334364.3|DLX6-AS1-201|DLX6-AS1|15364|	0.321232	4.84674e-10	8.37408e-07
ENST00000566193.1|ENSG00000260197.1|OTTHUMG00000175431.1|OTTHUMT00000429943.1|ENST00000566193|ENSG00000260197|2666|	0.320054	5.48329e-10	8.52652e-07
ENST00000667505.1|ENSG00000250241.7|OTTHUMG00000161299.3|OTTHUMT00000364454.2|PCDH10-DT-211|PCDH10-DT|8044|	0.314373	9.90482e-10	1.36104e-06
ENST00000604070.1|ENSG00000271533.1|OTTHUMG00000184205.1|OTTHUMT00000468302.1|ENST00000604070|ENSG00000271533|3685|	0.313806	1.05032e-09	1.36104e-06
ENST00000668456.1|ENSG00000287578.1|OTTHUMG00000195375.1|OTTHUMT00000526678.1|ENST00000668456|ENSG00000287578|5936|	0.31214	1.24754e-09	1.49225e-06
ENST00000627566.1|ENSG00000280650.1|OTTHUMG00000189553.1|OTTHUMT00000479956.1|KCNIP4-IT1-201|KCNIP4-IT1|9848|	0.308009	1.90634e-09	2.1174e-06
ENST00000635449.1|ENSG00000282961.1|OTTHUMG00000191472.1|OTTHUMT00000488007.1|PRNCR1-201|PRNCR1|12727|	0.306123	2.31088e-09	2.39562e-06
ENST00000562284.1|ENSG00000260918.1|OTTHUMG00000175912.2|OTTHUMT00000431265.2|ENST00000562284|ENSG00000260918|7000|	0.305167	2.54719e-09	2.47555e-06
ENST00000624969.1|ENSG00000280105.1|OTTHUMG00000185593.1|OTTHUMT00000470799.1|ENST00000624969|ENSG00000280105|3585|	0.303809	2.9237e-09	2.64454e-06
ENST00000669690.1|ENSG00000250863.2|OTTHUMG00000160444.8|OTTHUMT00000527466.1|ENST00000669690|ENSG00000250863|7750|	0.303355	3.0612e-09	2.64454e-06
ENST00000652994.1|ENSG00000288049.1|OTTHUMG00000193885.1|OTTHUMT00000506175.1|ENST00000652994|ENSG00000288049|5625|	0.30243	3.36161e-09	2.75121e-06
ENST00000568248.1|ENSG00000259820.1|OTTHUMG00000164324.1|OTTHUMT00000378288.1|MIR30DHG-201|MIR30DHG|6253|	0.30181	3.57905e-09	2.78271e-06
ENST00000577346.1|ENSG00000264727.1|OTTHUMG00000178265.1|OTTHUMT00000441216.1|ENST00000577346|ENSG00000264727|2607|	0.299966	4.30982e-09	3.19132e-06
ENST00000625268.2|ENSG00000280776.2|OTTHUMG00000189552.2|OTTHUMT00000479955.2|LINC01202-201|LINC01202|4388|	0.299022	4.73903e-09	3.34963e-06
ENST00000425493.1|ENSG00000229311.1|OTTHUMG00000067212.1|OTTHUMT00000143910.1|ENST00000425493|ENSG00000229311|3614|	0.297673	5.42515e-09	3.66787e-06
ENST00000654041.1|ENSG00000288535.1|OTTHUMG00000152143.13|OTTHUMT00000528606.1|ENST00000654041|ENSG00000288535|4039|	0.296706	5.97606e-09	3.87199e-06
ENST00000499521.2|ENSG00000230551.4|OTTHUMG00000163462.2|OTTHUMT00000470933.1|ENST00000499521|ENSG00000230551|8636|	0.293906	7.89878e-09	4.91304e-06
ENST00000661028.1|ENSG00000287907.1|OTTHUMG00000194944.1|OTTHUMT00000523321.1|ENST00000661028|ENSG00000287907|3361|	0.293175	8.49307e-09	5.07951e-06
ENST00000561746.1|ENSG00000261098.1|OTTHUMG00000172986.1|OTTHUMT00000421595.1|ENST00000561746|ENSG00000261098|4140|	0.292469	9.1085e-09	5.24582e-06
ENST00000433310.6|ENSG00000232855.7|OTTHUMG00000078747.6|OTTHUMT00000171732.3|ENST00000433310|ENSG00000232855|6103|	0.288801	1.30802e-08	7.26417e-06
ENST00000574616.2|ENSG00000263244.2|OTTHUMG00000178148.2|OTTHUMT00000440762.2|ENST00000574616|ENSG00000263244|8334|	0.287925	1.42545e-08	7.64339e-06
ENST00000623539.1|ENSG00000280385.1|OTTHUMG00000167661.2|OTTHUMT00000395464.2|ENST00000623539|ENSG00000280385|4507|	0.285729	1.76708e-08	9.15936e-06
ENST00000501122.2|ENSG00000245532.11|OTTHUMG00000166321.8|OTTHUMT00000389142.3|NEAT1-202|NEAT1|22743|	0.28532	1.839e-08	9.22464e-06
ENST00000604411.1|ENSG00000270641.2|OTTHUMG00000184725.1|OTTHUMT00000469120.1|TSIX-201|TSIX|37027|	0.283866	2.1188e-08	1.00386e-05
ENST00000563417.1|ENSG00000260505.1|OTTHUMG00000176320.1|OTTHUMT00000431758.1|ENST00000563417|ENSG00000260505|2912|	0.28381	2.13037e-08	1.00386e-05
ENST00000624029.1|ENSG00000280347.1|OTTHUMG00000066284.1|OTTHUMT00000141831.1|ENST00000624029|ENSG00000280347|4975|	0.282539	2.40993e-08	1.07351e-05
ENST00000428709.2|ENSG00000233651.2|OTTHUMG00000067237.2|OTTHUMT00000143935.2|ENST00000428709|ENSG00000233651|3325|	0.282512	2.41626e-08	1.07351e-05
ENST00000450977.2|ENSG00000235139.2|OTTHUMG00000154603.3|OTTHUMT00000336286.3|LINC03017-202|LINC03017|4104|	0.282143	2.50429e-08	1.08171e-05
ENST00000696465.1|ENSG00000289707.1|-|-|ENST00000696465|ENSG00000289707|3335|	0.281451	2.6777e-08	1.11952e-05
ENST00000435411.6|ENSG00000234663.7|OTTHUMG00000154205.10|OTTHUMT00000334384.3|LINC01934-205|LINC01934|11533|	0.281229	2.7358e-08	1.11952e-05
ENST00000636467.2|ENSG00000283503.4|OTTHUMG00000191634.2|OTTHUMT00000488947.2|LINC01902-201|LINC01902|7784|	0.280953	2.80969e-08	1.12027e-05
ENST00000569460.1|ENSG00000260585.1|OTTHUMG00000176478.1|OTTHUMT00000432179.1|ENST00000569460|ENSG00000260585|4997|	0.280571	2.91533e-08	1.13333e-05
ENST00000649072.1|ENSG00000285811.1|OTTHUMG00000192870.1|OTTHUMT00000499428.1|ENST00000649072|ENSG00000285811|3685|	0.280148	3.03661e-08	1.15169e-05
ENST00000661802.1|ENSG00000286786.1|OTTHUMG00000195373.1|OTTHUMT00000526667.1|ENST00000661802|ENSG00000286786|6449|	0.278409	3.58976e-08	1.32906e-05
ENST00000624067.1|ENSG00000279628.1|OTTHUMG00000175834.1|OTTHUMT00000431156.1|ENST00000624067|ENSG00000279628|4211|	0.277914	3.76438e-08	1.36131e-05
ENST00000561652.1|ENSG00000260966.1|OTTHUMG00000173208.1|OTTHUMT00000422471.1|ENST00000561652|ENSG00000260966|5113|	0.277216	4.02478e-08	1.4224e-05
ENST00000512241.1|ENSG00000248339.1|OTTHUMG00000161813.2|OTTHUMT00000366141.2|LINC02504-201|LINC02504|4949|	0.276804	4.18682e-08	1.44678e-05
ENST00000670545.1|ENSG00000286889.1|OTTHUMG00000195669.1|OTTHUMT00000528159.1|ENST00000670545|ENSG00000286889|4808|	0.275701	4.65221e-08	1.57265e-05
ENST00000624409.1|ENSG00000279207.1|OTTHUMG00000178784.2|OTTHUMT00000443340.2|ENST00000624409|ENSG00000279207|5808|	0.274979	4.9837e-08	1.64886e-05
ENST00000576365.1|ENSG00000261997.1|OTTHUMG00000177970.1|OTTHUMT00000440031.1|ENST00000576365|ENSG00000261997|3828|	0.27418	5.37785e-08	1.7422e-05
ENST00000623391.1|ENSG00000280341.1|OTTHUMG00000189266.1|OTTHUMT00000479247.1|ENST00000623391|ENSG00000280341|6114|	0.273456	5.76073e-08	1.82815e-05
ENST00000439824.2|ENSG00000233424.2|OTTHUMG00000058152.2|OTTHUMT00000128846.2|ENST00000439824|ENSG00000233424|3224|	0.272552	6.27671e-08	1.9337e-05
ENST00000666115.1|ENSG00000288015.1|OTTHUMG00000194965.1|OTTHUMT00000523454.1|ENST00000666115|ENSG00000288015|2230|	0.272442	6.34203e-08	1.9337e-05
ENST00000565058.2|ENSG00000260711.2|OTTHUMG00000172989.2|OTTHUMT00000421598.2|ENST00000565058|ENSG00000260711|6943|	0.271273	7.08383e-08	2.11834e-05
ENST00000566527.1|ENSG00000261757.1|OTTHUMG00000173470.1|OTTHUMT00000423225.1|ENST00000566527|ENSG00000261757|1640|	0.270301	7.76454e-08	2.27809e-05
ENST00000501211.2|ENSG00000253284.2|OTTHUMG00000168904.1|OTTHUMT00000401571.1|ENST00000501211|ENSG00000253284|5391|	0.269907	8.05805e-08	2.32042e-05
ENST00000432230.6|ENSG00000235609.7|OTTHUMG00000189713.1|OTTHUMT00000481086.1|ENST00000432230|ENSG00000235609|5929|	0.269353	8.48927e-08	2.38599e-05
ENST00000666016.1|ENSG00000287307.1|OTTHUMG00000195049.1|OTTHUMT00000524035.1|ENST00000666016|ENSG00000287307|4429|	0.269075	8.71395e-08	2.38599e-05
ENST00000568885.2|ENSG00000260816.2|OTTHUMG00000176931.2|OTTHUMT00000434352.2|ENST00000568885|ENSG00000260816|4284|	0.269036	8.74608e-08	2.38599e-05
ENST00000568279.2|ENSG00000261807.2|OTTHUMG00000173092.3|OTTHUMT00000422126.2|LINC02141-201|LINC02141|6586|	0.268259	9.40759e-08	2.52221e-05
ENST00000623602.1|ENSG00000280106.1|OTTHUMG00000175770.1|OTTHUMT00000431049.1|ENST00000623602|ENSG00000280106|2168|	0.267928	9.70432e-08	2.54527e-05
ENST00000415801.1|ENSG00000226237.4|OTTHUMG00000020143.3|OTTHUMT00000052930.1|GAS1RR-201|GAS1RR|4387|	0.267801	9.82099e-08	2.54527e-05
ENST00000584382.1|ENSG00000266371.1|OTTHUMG00000179255.1|OTTHUMT00000445477.1|ENST00000584382|ENSG00000266371|2780|	0.267222	1.03674e-07	2.63786e-05
ENST00000635019.1|ENSG00000283097.1|OTTHUMG00000191493.1|OTTHUMT00000488088.1|ENST00000635019|ENSG00000283097|2587|	0.266863	1.07217e-07	2.63786e-05
ENST00000693725.1|ENSG00000289215.1|-|-|ENST00000693725|ENSG00000289215|2574|	0.266831	1.07538e-07	2.63786e-05
ENST00000652952.1|ENSG00000287536.1|OTTHUMG00000195652.1|OTTHUMT00000528056.1|ENST00000652952|ENSG00000287536|3327|	0.266729	1.08568e-07	2.63786e-05
ENST00000565399.1|ENSG00000259828.1|OTTHUMG00000175944.1|OTTHUMT00000431299.1|ENST00000565399|ENSG00000259828|3996|	0.266229	1.13762e-07	2.72154e-05
ENST00000623125.1|ENSG00000280219.1|OTTHUMG00000161357.1|OTTHUMT00000364643.1|ENST00000623125|ENSG00000280219|8092|	0.265958	1.16675e-07	2.7232e-05
ENST00000654083.2|ENSG00000269893.10|OTTHUMG00000183991.6|OTTHUMT00000467703.2|SNHG8-207|SNHG8|6166|	0.265898	1.17334e-07	2.7232e-05
ENST00000503488.2|ENSG00000249359.3|OTTHUMG00000162363.3|OTTHUMT00000368633.2|ENST00000503488|ENSG00000249359|5454|	0.265601	1.20626e-07	2.75844e-05
ENST00000656997.1|ENSG00000224944.2|OTTHUMG00000015221.3|OTTHUMT00000526274.1|CASC6-203|CASC6|2577|	0.265308	1.23958e-07	2.79355e-05
ENST00000691930.1|ENSG00000289392.1|-|-|ENST00000691930|ENSG00000289392|1388|	0.264362	1.35373e-07	3.00722e-05
ENST00000633055.1|ENSG00000279663.3|OTTHUMG00000191354.1|OTTHUMT00000487695.1|ENST00000633055|ENSG00000279663|4006|	0.264155	1.37997e-07	3.02233e-05
ENST00000623075.1|ENSG00000280383.1|OTTHUMG00000189269.1|OTTHUMT00000479250.1|ENST00000623075|ENSG00000280383|23112|	0.263486	1.46838e-07	3.15585e-05
ENST00000608229.1|ENSG00000273372.1|OTTHUMG00000186448.1|OTTHUMT00000473167.1|SFTPD-AS1-201|SFTPD-AS1|5001|	0.26339	1.48153e-07	3.15585e-05
ENST00000624239.1|ENSG00000279675.1|OTTHUMG00000173211.1|OTTHUMT00000422478.1|ENST00000624239|ENSG00000279675|5356|	0.263113	1.52004e-07	3.19414e-05
ENST00000623483.2|ENSG00000279145.2|OTTHUMG00000172652.3|OTTHUMT00000419667.2|ENST00000623483|ENSG00000279145|5362|	0.262698	1.57959e-07	3.27501e-05
ENST00000560400.1|ENSG00000259623.1|OTTHUMG00000172022.1|OTTHUMT00000416526.1|ENST00000560400|ENSG00000259623|2930|	0.25981	2.0617e-07	4.21836e-05
ENST00000655519.1|ENSG00000287318.1|OTTHUMG00000195030.1|OTTHUMT00000523838.1|ENST00000655519|ENSG00000287318|3766|	0.258973	2.22641e-07	4.49619e-05
ENST00000667130.1|ENSG00000285680.2|OTTHUMG00000192764.2|OTTHUMT00000522305.1|ENST00000667130|ENSG00000285680|3808|	0.258624	2.29871e-07	4.58269e-05
ENST00000671190.1|ENSG00000287223.1|OTTHUMG00000195038.1|OTTHUMT00000523884.1|ENST00000671190|ENSG00000287223|3855|	0.25604	2.91066e-07	5.70113e-05
ENST00000392097.5|ENSG00000213062.5|OTTHUMG00000186558.2|OTTHUMT00000473347.2|ENST00000392097|ENSG00000213062|14107|	0.255956	2.93306e-07	5.70113e-05
ENST00000659778.1|ENSG00000286976.1|OTTHUMG00000195024.1|OTTHUMT00000523796.1|ENST00000659778|ENSG00000286976|4179|	0.254353	3.39285e-07	6.44746e-05
ENST00000643055.1|ENSG00000284902.1|OTTHUMG00000192520.1|OTTHUMT00000495179.1|ENST00000643055|ENSG00000284902|1506|	0.25433	3.39995e-07	6.44746e-05
ENST00000623330.1|ENSG00000280367.1|OTTHUMG00000167306.1|OTTHUMT00000394123.1|ENST00000623330|ENSG00000280367|3386|	0.254177	3.44743e-07	6.45874e-05
ENST00000624429.1|ENSG00000279289.1|OTTHUMG00000184053.1|OTTHUMT00000467931.1|ENST00000624429|ENSG00000279289|3978|	0.253882	3.54101e-07	6.55508e-05
ENST00000609803.3|ENSG00000273015.3|OTTHUMG00000185943.2|OTTHUMT00000471803.2|LINC00938-201|LINC00938|9815|	0.253433	3.68764e-07	6.74621e-05
ENST00000661804.1|ENSG00000286279.3|OTTHUMG00000195288.1|OTTHUMT00000525939.1|ENST00000661804|ENSG00000286279|6636|	0.253045	3.81955e-07	6.90099e-05
ENST00000623195.1|ENSG00000280281.1|OTTHUMG00000172921.1|OTTHUMT00000421358.1|ENST00000623195|ENSG00000280281|3585|	0.252925	3.861e-07	6.90099e-05
ENST00000557359.6|ENSG00000258548.6|OTTHUMG00000170580.5|OTTHUMT00000409672.3|LINC00645-202|LINC00645|3495|	0.252781	3.91153e-07	6.91185e-05
ENST00000668057.1|ENSG00000286984.1|OTTHUMG00000195551.1|OTTHUMT00000527522.1|ENST00000668057|ENSG00000286984|2478|	0.251885	4.24094e-07	7.40974e-05
ENST00000629393.1|ENSG00000281026.1|OTTHUMG00000189577.1|OTTHUMT00000479998.1|N4BP2L2-IT2-201|N4BP2L2-IT2|4890|	0.250396	4.84857e-07	8.37725e-05
ENST00000660308.1|ENSG00000248801.7|OTTHUMG00000164449.3|OTTHUMT00000378853.3|C8orf34-AS1-209|C8orf34-AS1|2842|	0.250109	4.97469e-07	8.50071e-05
ENST00000419766.5|ENSG00000197085.11|OTTHUMG00000153007.5|OTTHUMT00000475243.1|NPSR1-AS1-202|NPSR1-AS1|4821|	0.249885	5.07577e-07	8.57916e-05
ENST00000624480.1|ENSG00000279192.1|OTTHUMG00000184194.1|OTTHUMT00000468274.1|PWAR5-201|PWAR5|3180|	0.249493	5.25746e-07	8.7907e-05
ENST00000564541.1|ENSG00000261366.1|OTTHUMG00000175933.1|OTTHUMT00000431287.1|MANEA-DT-201|MANEA-DT|2268|	0.248568	5.71055e-07	9.44672e-05
ENST00000689956.1|ENSG00000289040.1|-|-|ENST00000689956|ENSG00000289040|1890|	0.24781	6.11059e-07	0.000100021
ENST00000659448.1|ENSG00000287841.1|OTTHUMG00000195277.1|OTTHUMT00000525773.1|ENST00000659448|ENSG00000287841|3691|	0.246534	6.84515e-07	0.000110304
ENST00000455929.1|ENSG00000233061.1|OTTHUMG00000009973.1|OTTHUMT00000027639.1|TTLL7-IT1-201|TTLL7-IT1|2921|	0.246476	6.88069e-07	0.000110304
ENST00000451240.1|ENSG00000237070.1|OTTHUMG00000152391.1|OTTHUMT00000326059.1|ENST00000451240|ENSG00000237070|3743|	0.24615	7.08259e-07	0.000111258
ENST00000648308.1|ENSG00000285608.1|OTTHUMG00000193300.1|OTTHUMT00000500679.1|ENST00000648308|ENSG00000285608|3938|	0.246149	7.0833e-07	0.000111258
ENST00000693491.1|ENSG00000289488.1|-|-|ENST00000693491|ENSG00000289488|1132|	0.245216	7.69395e-07	0.000119095
ENST00000687842.1|ENSG00000288971.1|-|-|ENST00000687842|ENSG00000288971|1470|	0.24514	7.74605e-07	0.000119095
ENST00000670412.1|ENSG00000287728.2|OTTHUMG00000195495.1|OTTHUMT00000527200.1|ENST00000670412|ENSG00000287728|3484|	0.245044	7.81199e-07	0.000119095
ENST00000658819.1|ENSG00000287693.1|OTTHUMG00000194766.1|OTTHUMT00000521743.1|ENST00000658819|ENSG00000287693|5720|	0.244675	8.07154e-07	0.000121857
ENST00000564407.2|ENSG00000259915.2|OTTHUMG00000176270.2|OTTHUMT00000431706.2|ENST00000564407|ENSG00000259915|2204|	0.244296	8.34629e-07	0.000124793
ENST00000625039.1|ENSG00000279091.1|OTTHUMG00000172042.1|OTTHUMT00000416592.1|ENST00000625039|ENSG00000279091|7739|	0.243979	8.58305e-07	0.000127111
ENST00000568811.1|ENSG00000261728.1|OTTHUMG00000175980.1|OTTHUMT00000431342.1|ENST00000568811|ENSG00000261728|2243|	0.243568	8.89998e-07	0.000130561
ENST00000409590.1|ENSG00000222030.1|OTTHUMG00000152615.2|OTTHUMT00000327020.2|LINC01793-201|LINC01793|2036|	0.243369	9.05739e-07	0.000131628
ENST00000690414.1|ENSG00000289463.1|-|-|ENST00000690414|ENSG00000289463|2341|	0.242574	9.71384e-07	0.000139861
ENST00000661392.1|ENSG00000287390.1|OTTHUMG00000195269.1|OTTHUMT00000525720.1|ENST00000661392|ENSG00000287390|2582|	0.242402	9.86254e-07	0.000139974
ENST00000508135.2|ENSG00000249831.2|OTTHUMG00000162318.3|OTTHUMT00000368560.3|ENST00000508135|ENSG00000249831|2672|	0.242346	9.9112e-07	0.000139974
ENST00000561816.1|ENSG00000261340.1|OTTHUMG00000173210.1|OTTHUMT00000422475.1|LINC01616-201|LINC01616|2280|	0.242253	9.99174e-07	0.000139974
ENST00000685315.1|ENSG00000289420.1|-|-|ENST00000685315|ENSG00000289420|1067|	0.241838	1.03628e-06	0.000143876
ENST00000567967.1|ENSG00000260385.1|OTTHUMG00000176075.1|OTTHUMT00000431476.1|ENST00000567967|ENSG00000260385|1923|	0.24147	1.07025e-06	0.000146833
ENST00000607862.5|ENSG00000234377.8|OTTHUMG00000185746.4|OTTHUMT00000471155.1|OBI1-AS1-214|OBI1-AS1|6001|	0.241404	1.07646e-06	0.000146833
ENST00000623199.1|ENSG00000279442.1|OTTHUMG00000189267.1|OTTHUMT00000479248.1|ENST00000623199|ENSG00000279442|6179|	0.240955	1.11966e-06	0.000151397
ENST00000508189.1|ENSG00000249568.1|OTTHUMG00000161417.1|OTTHUMT00000364865.1|ENST00000508189|ENSG00000249568|2840|	0.240188	1.19733e-06	0.000160503
ENST00000624743.1|ENSG00000280268.1|OTTHUMG00000177647.1|OTTHUMT00000438231.1|ENST00000624743|ENSG00000280268|1922|	0.239341	1.28924e-06	0.000170512
ENST00000565549.1|ENSG00000261541.1|OTTHUMG00000176498.1|OTTHUMT00000432344.1|ENST00000565549|ENSG00000261541|4147|	0.239216	1.30329e-06	0.000170512
ENST00000652926.1|ENSG00000286937.1|OTTHUMG00000195632.1|OTTHUMT00000527903.1|ENST00000652926|ENSG00000286937|1873|	0.239114	1.31494e-06	0.000170512
ENST00000657314.1|ENSG00000287400.1|OTTHUMG00000195668.1|OTTHUMT00000528148.1|ENST00000657314|ENSG00000287400|4437|	0.239106	1.31585e-06	0.000170512
ENST00000556948.1|ENSG00000290326.1|-|OTTHUMT00000414853.1|ENST00000556948|ENSG00000290326|3036|	0.238802	1.35119e-06	0.000173645
ENST00000562691.2|ENSG00000261324.2|OTTHUMG00000172902.2|OTTHUMT00000421264.2|ENST00000562691|ENSG00000261324|5428|	0.238014	1.44696e-06	0.000184428
ENST00000535939.5|ENSG00000290537.1|-|OTTHUMT00000359306.2|ENST00000535939|ENSG00000290537|2353|	0.23755	1.5064e-06	0.000190443
ENST00000655874.1|ENSG00000227486.4|OTTHUMG00000021664.6|OTTHUMT00000523055.1|ENST00000655874|ENSG00000227486|4651|	0.237107	1.56548e-06	0.000195486
ENST00000623877.1|ENSG00000280027.1|OTTHUMG00000177941.1|OTTHUMT00000439842.1|ENST00000623877|ENSG00000280027|1385|	0.237063	1.57143e-06	0.000195486
ENST00000623357.1|ENSG00000280305.1|OTTHUMG00000173436.1|OTTHUMT00000423100.1|ENST00000623357|ENSG00000280305|3446|	0.236672	1.62559e-06	0.000200619
ENST00000566446.1|ENSG00000259865.1|OTTHUMG00000176477.1|OTTHUMT00000432177.1|ENST00000566446|ENSG00000259865|1246|	0.236401	1.66409e-06	0.000203753
ENST00000658020.1|ENSG00000242671.2|OTTHUMG00000159455.2|OTTHUMT00000355496.2|LINC02010-203|LINC02010|4232|	0.236065	1.71307e-06	0.000207213
ENST00000660105.1|ENSG00000257761.3|OTTHUMG00000169544.2|OTTHUMT00000524935.1|ENST00000660105|ENSG00000257761|2606|	0.236025	1.719e-06	0.000207213
ENST00000610331.1|ENSG00000276334.1|OTTHUMG00000188157.1|OTTHUMT00000476391.1|ENST00000610331|ENSG00000276334|1621|	0.235588	1.78517e-06	0.000209906
ENST00000648942.1|ENSG00000285831.1|OTTHUMG00000193379.1|OTTHUMT00000501196.1|ENST00000648942|ENSG00000285831|4355|	0.235588	1.78518e-06	0.000209906
ENST00000652296.1|ENSG00000286040.1|OTTHUMG00000193486.1|OTTHUMT00000502123.1|ENST00000652296|ENSG00000286040|4968|	0.235532	1.79373e-06	0.000209906
ENST00000648286.1|ENSG00000285719.2|OTTHUMG00000192749.2|OTTHUMT00000499009.1|ENST00000648286|ENSG00000285719|1950|	0.235478	1.80214e-06	0.000209906
ENST00000625192.1|ENSG00000279189.1|OTTHUMG00000167117.1|OTTHUMT00000393277.1|ENST00000625192|ENSG00000279189|5446|	0.235435	1.80883e-06	0.000209906
ENST00000661752.1|ENSG00000287416.1|OTTHUMG00000195221.1|OTTHUMT00000525429.1|ENST00000661752|ENSG00000287416|3071|	0.235168	1.85093e-06	0.000213199
ENST00000451762.4|ENSG00000180769.10|OTTHUMG00000141281.8|OTTHUMT00000280506.3|WDFY3-AS2-202|WDFY3-AS2|6593|	0.234761	1.91697e-06	0.000219125
ENST00000550290.2|ENSG00000257354.2|OTTHUMG00000169989.2|OTTHUMT00000406759.2|MIRLET7IHG-201|MIRLET7IHG|8693|	0.234679	1.93056e-06	0.000219125
ENST00000566293.1|ENSG00000260412.1|OTTHUMG00000175585.1|OTTHUMT00000430554.1|ENST00000566293|ENSG00000260412|6881|	0.234415	1.97482e-06	0.000222525
ENST00000606125.1|ENSG00000272316.1|OTTHUMG00000185767.1|OTTHUMT00000471199.1|ENST00000606125|ENSG00000272316|5352|	0.23406	2.03615e-06	0.000227785
ENST00000659573.1|ENSG00000286876.1|OTTHUMG00000194772.1|OTTHUMT00000521775.1|ENST00000659573|ENSG00000286876|2234|	0.233921	2.06048e-06	0.000228861
ENST00000692035.1|ENSG00000290911.1|-|-|ENST00000692035|ENSG00000290911|4870|	0.233816	2.07917e-06	0.000229298
ENST00000620864.1|ENSG00000196167.10|OTTHUMG00000166658.3|OTTHUMT00000390999.2|COLCA1-205|COLCA1|8098|	0.233581	2.12154e-06	0.000232323
ENST00000665595.1|ENSG00000286274.1|OTTHUMG00000195576.1|OTTHUMT00000527583.1|ENST00000665595|ENSG00000286274|3895|	0.23347	2.14176e-06	0.000232898
ENST00000668912.1|ENSG00000286402.1|OTTHUMG00000195272.1|OTTHUMT00000525742.1|ENST00000668912|ENSG00000286402|4425|	0.233357	2.16274e-06	0.000233546
ENST00000652679.2|ENSG00000286081.2|OTTHUMG00000192772.2|OTTHUMT00000499080.2|ENST00000652679|ENSG00000286081|2488|	0.233149	2.20161e-06	0.000236104
ENST00000565862.1|ENSG00000260398.1|OTTHUMG00000173418.1|OTTHUMT00000423041.1|ENST00000565862|ENSG00000260398|3754|	0.232828	2.26287e-06	0.000241011
ENST00000593427.1|ENSG00000268205.1|OTTHUMG00000183241.1|OTTHUMT00000465778.1|ENST00000593427|ENSG00000268205|4258|	0.232644	2.29883e-06	0.000243175
ENST00000671167.1|ENSG00000287447.1|OTTHUMG00000195529.1|OTTHUMT00000527432.1|ENST00000671167|ENSG00000287447|3197|	0.232424	2.34254e-06	0.000246125
ENST00000687527.1|ENSG00000289054.1|-|-|ENST00000687527|ENSG00000289054|2670|	0.23222	2.38385e-06	0.000248784
ENST00000564832.1|ENSG00000260838.3|OTTHUMG00000164521.2|OTTHUMT00000379092.2|ENST00000564832|ENSG00000260838|3296|	0.232019	2.42507e-06	0.000251399
ENST00000561973.1|ENSG00000260118.1|OTTHUMG00000175555.2|OTTHUMT00000430475.1|ENST00000561973|ENSG00000260118|1432|	0.231307	2.57699e-06	0.000265378
ENST00000699473.1|ENSG00000213963.7|OTTHUMG00000132531.15|-|ENST00000699473|ENSG00000213963|4833|	0.231019	2.64096e-06	0.000270177
ENST00000641454.1|ENSG00000290647.1|-|OTTHUMT00000493221.1|ENST00000641454|ENSG00000290647|2853|	0.230702	2.71318e-06	0.000274026
ENST00000661475.1|ENSG00000258636.2|OTTHUMG00000170691.2|OTTHUMT00000522654.1|LRFN5-DT-202|LRFN5-DT|4933|	0.230699	2.71383e-06	0.000274026
ENST00000589496.2|ENSG00000267520.2|OTTHUMG00000179927.2|OTTHUMT00000448990.2|ENST00000589496|ENSG00000267520|5702|	0.229969	2.88758e-06	0.000288073
ENST00000623249.1|ENSG00000279305.1|OTTHUMG00000175838.1|OTTHUMT00000431163.1|ENST00000623249|ENSG00000279305|2239|	0.229959	2.88999e-06	0.000288073
ENST00000669335.1|ENSG00000288565.1|OTTHUMG00000153065.3|OTTHUMT00000528852.1|ENST00000669335|ENSG00000288565|4963|	0.229833	2.92117e-06	0.000289326
ENST00000628368.1|ENSG00000280837.1|OTTHUMG00000189581.1|OTTHUMT00000480006.1|CPS1-IT1-201|CPS1-IT1|2306|	0.229041	3.12394e-06	0.000306387
ENST00000522817.3|ENSG00000253738.3|OTTHUMG00000164022.3|OTTHUMT00000376786.2|OTUD6B-AS1-201|OTUD6B-AS1|4935|	0.229008	3.13284e-06	0.000306387
ENST00000590226.1|ENSG00000291024.1|-|OTTHUMT00000451403.1|ENST00000590226|ENSG00000291024|5589|	0.228852	3.17438e-06	0.000306775
ENST00000563286.1|ENSG00000259959.1|OTTHUMG00000176325.1|OTTHUMT00000431763.1|ENST00000563286|ENSG00000259959|4218|	0.228845	3.17625e-06	0.000306775
ENST00000591628.1|ENSG00000267160.1|OTTHUMG00000181823.1|OTTHUMT00000457815.1|ENST00000591628|ENSG00000267160|2569|	0.228601	3.24248e-06	0.000311238
ENST00000661512.1|ENSG00000286653.1|OTTHUMG00000195242.1|OTTHUMT00000525533.1|ENST00000661512|ENSG00000286653|3217|	0.22828	3.33193e-06	0.000317862
ENST00000565823.1|ENSG00000260686.1|OTTHUMG00000173460.1|OTTHUMT00000423202.1|ENST00000565823|ENSG00000260686|2178|	0.228085	3.38728e-06	0.000320614
ENST00000609909.1|ENSG00000273373.1|OTTHUMG00000186360.1|OTTHUMT00000473001.1|SLC16A4-AS1-201|SLC16A4-AS1|2850|	0.228033	3.40201e-06	0.000320614
ENST00000565538.1|ENSG00000260090.1|OTTHUMG00000162098.1|OTTHUMT00000367223.1|ENST00000565538|ENSG00000260090|3654|	0.227527	3.55052e-06	0.000332593
ENST00000623012.1|ENSG00000279376.1|OTTHUMG00000175959.1|OTTHUMT00000431315.1|ENST00000623012|ENSG00000279376|4159|	0.227096	3.68183e-06	0.000342829
ENST00000484892.5|ENSG00000242641.6|OTTHUMG00000158981.8|OTTHUMT00000352776.2|LINC00971-202|LINC00971|7308|	0.226914	3.73858e-06	0.00034589
ENST00000655082.1|ENSG00000261326.4|OTTHUMG00000175761.6|OTTHUMT00000529010.1|LINC01355-204|LINC01355|5301|	0.226849	3.75919e-06	0.00034589
ENST00000443374.7|ENSG00000226200.7|OTTHUMG00000018230.4|OTTHUMT00000048071.3|SGMS1-AS1-201|SGMS1-AS1|12408|	0.226598	3.8392e-06	0.000351174
ENST00000623412.1|ENSG00000279894.1|OTTHUMG00000175537.1|OTTHUMT00000430439.1|ENST00000623412|ENSG00000279894|2297|	0.226467	3.88193e-06	0.000352106
ENST00000556602.1|ENSG00000259008.1|OTTHUMG00000171310.1|OTTHUMT00000412923.1|ENST00000556602|ENSG00000259008|3965|	0.226428	3.89467e-06	0.000352106
ENST00000624567.1|ENSG00000279957.1|OTTHUMG00000187434.1|OTTHUMT00000474952.1|ENST00000624567|ENSG00000279957|1173|	0.226083	4.00908e-06	0.000360353
ENST00000669183.1|ENSG00000254266.6|OTTHUMG00000164617.2|OTTHUMT00000527201.1|PKIA-AS1-205|PKIA-AS1|2109|	0.22587	4.0816e-06	0.000364764
ENST00000569873.1|ENSG00000261182.1|OTTHUMG00000176310.1|OTTHUMT00000431747.1|ENST00000569873|ENSG00000261182|2277|	0.22565	4.15757e-06	0.00036834
ENST00000666718.1|ENSG00000287039.1|OTTHUMG00000195007.1|OTTHUMT00000523704.1|ENST00000666718|ENSG00000287039|4127|	0.225617	4.169e-06	0.00036834
ENST00000624610.1|ENSG00000279722.1|OTTHUMG00000173215.1|OTTHUMT00000422488.1|ENST00000624610|ENSG00000279722|2337|	0.225395	4.24741e-06	0.000373148
ENST00000561622.1|ENSG00000260772.1|OTTHUMG00000176834.1|OTTHUMT00000433979.1|ENST00000561622|ENSG00000260772|1588|	0.225182	4.32378e-06	0.000377723
ENST00000612496.1|ENSG00000275512.1|OTTHUMG00000178602.2|OTTHUMT00000442658.2|ENST00000612496|ENSG00000275512|2533|	0.224939	4.41252e-06	0.000383323
ENST00000594230.1|ENSG00000269397.1|OTTHUMG00000183390.1|OTTHUMT00000466446.1|ENST00000594230|ENSG00000269397|1500|	0.224867	4.43943e-06	0.000383518
ENST00000647704.1|ENSG00000285684.1|OTTHUMG00000192902.1|OTTHUMT00000499528.1|ENST00000647704|ENSG00000285684|5485|	0.224793	4.46701e-06	0.000383768
ENST00000622740.3|ENSG00000186960.14|OTTHUMG00000029410.9|OTTHUMT00000502116.2|LINC01551-205|LINC01551|6608|	0.224603	4.53847e-06	0.000387765
ENST00000654141.1|ENSG00000224687.2|OTTHUMG00000040865.2|OTTHUMT00000527912.1|RASAL2-AS1-204|RASAL2-AS1|2831|	0.223869	4.82555e-06	0.00040884
ENST00000653672.1|ENSG00000286520.1|OTTHUMG00000195438.1|OTTHUMT00000526891.1|ENST00000653672|ENSG00000286520|4270|	0.223838	4.83772e-06	0.00040884
ENST00000580891.1|ENSG00000266805.1|OTTHUMG00000178671.1|OTTHUMT00000442872.1|ENST00000580891|ENSG00000266805|3485|	0.22342	5.00951e-06	0.000421069
ENST00000534866.1|ENSG00000291182.1|-|OTTHUMT00000400235.1|ENST00000534866|ENSG00000291182|2403|	0.223354	5.03722e-06	0.000421122
ENST00000566529.1|ENSG00000261146.1|OTTHUMG00000175811.1|OTTHUMT00000431116.1|ENST00000566529|ENSG00000261146|4706|	0.222486	5.41417e-06	0.000450215
ENST00000603837.1|ENSG00000271167.1|OTTHUMG00000184925.1|OTTHUMT00000469342.1|LINC01109-201|LINC01109|3081|	0.222136	5.57412e-06	0.000461051
ENST00000581072.6|ENSG00000265142.9|OTTHUMG00000179284.4|OTTHUMT00000445571.2|MIR133A1HG-202|MIR133A1HG|4359|	0.222055	5.6115e-06	0.000461687
ENST00000662345.1|ENSG00000224613.7|OTTHUMG00000041348.4|OTTHUMT00000099062.3|RNPC3-DT-203|RNPC3-DT|2647|	0.22173	5.76465e-06	0.000469682
ENST00000620414.1|ENSG00000277534.1|OTTHUMG00000186526.1|OTTHUMT00000473291.1|ENST00000620414|ENSG00000277534|2821|	0.221721	5.76908e-06	0.000469682
ENST00000439004.1|ENSG00000234754.2|OTTHUMG00000037427.15|OTTHUMT00000091116.2|LINC02817-202|LINC02817|4340|	0.221218	6.01475e-06	0.000486982
ENST00000658746.1|ENSG00000286543.1|OTTHUMG00000195210.1|OTTHUMT00000525314.1|ENST00000658746|ENSG00000286543|2775|	0.221159	6.04421e-06	0.000486982
ENST00000685051.1|ENSG00000289094.1|-|-|ENST00000685051|ENSG00000289094|2012|	0.220322	6.4769e-06	0.000519154
ENST00000623722.1|ENSG00000278917.1|OTTHUMG00000182207.1|OTTHUMT00000460021.1|ENST00000623722|ENSG00000278917|4179|	0.220122	6.58463e-06	0.000525082
ENST00000447194.1|ENSG00000230173.1|OTTHUMG00000154367.1|OTTHUMT00000334978.1|LINC01790-201|LINC01790|2852|	0.220003	6.64986e-06	0.000525791
ENST00000518639.1|ENSG00000253106.1|OTTHUMG00000165069.1|OTTHUMT00000381671.1|ENST00000518639|ENSG00000253106|2355|	0.219982	6.66115e-06	0.000525791
ENST00000453420.5|ENSG00000236532.6|OTTHUMG00000078706.2|OTTHUMT00000171679.1|LINC01695-203|LINC01695|4486|	0.219867	6.72492e-06	0.000528144
ENST00000623410.1|ENSG00000280275.1|OTTHUMG00000175563.1|OTTHUMT00000430501.1|ENST00000623410|ENSG00000280275|2012|	0.219679	6.82956e-06	0.00053264
ENST00000600671.1|ENSG00000267934.1|OTTHUMG00000183269.1|OTTHUMT00000465894.1|ENST00000600671|ENSG00000267934|5134|	0.219642	6.85068e-06	0.00053264
ENST00000562191.2|ENSG00000261292.2|OTTHUMG00000175728.2|OTTHUMT00000430907.2|ENST00000562191|ENSG00000261292|2010|	0.21915	7.1336e-06	0.000551276
ENST00000584727.1|ENSG00000265579.1|OTTHUMG00000178982.1|OTTHUMT00000444209.1|ENST00000584727|ENSG00000265579|2206|	0.219071	7.18038e-06	0.000551276
ENST00000571340.1|ENSG00000262714.1|OTTHUMG00000176690.2|OTTHUMT00000433143.2|ENST00000571340|ENSG00000262714|2142|	0.219043	7.19672e-06	0.000551276
ENST00000673949.1|ENSG00000288563.1|OTTHUMG00000195958.1|OTTHUMT00000530228.1|ENST00000673949|ENSG00000288563|4225|	0.218926	7.26651e-06	0.000553893
ENST00000668940.1|ENSG00000286599.1|OTTHUMG00000195564.1|OTTHUMT00000527559.1|ENST00000668940|ENSG00000286599|2912|	0.218293	7.65388e-06	0.000579095
ENST00000588040.1|ENSG00000267152.1|OTTHUMG00000182110.1|OTTHUMT00000459508.1|ENST00000588040|ENSG00000267152|1360|	0.218265	7.67161e-06	0.000579095
ENST00000663663.1|ENSG00000272274.4|OTTHUMG00000185758.6|OTTHUMT00000523104.1|LINC00551-204|LINC00551|2666|	0.218189	7.71969e-06	0.000579428
ENST00000659131.1|ENSG00000287867.1|OTTHUMG00000195827.1|OTTHUMT00000528939.1|ENST00000659131|ENSG00000287867|6246|	0.21814	7.75055e-06	0.000579428
ENST00000670132.1|ENSG00000286282.1|OTTHUMG00000195531.1|OTTHUMT00000527435.1|ENST00000670132|ENSG00000286282|4224|	0.217842	7.94216e-06	0.000590912
ENST00000690934.1|ENSG00000291142.1|-|-|ENST00000690934|ENSG00000291142|2962|	0.217234	8.34779e-06	0.000618134
ENST00000607520.1|ENSG00000252690.3|OTTHUMG00000172405.1|OTTHUMT00000418411.1|ENST00000607520|ENSG00000252690|4325|	0.21716	8.3987e-06	0.000618956
ENST00000551932.1|ENSG00000257310.1|OTTHUMG00000170433.1|OTTHUMT00000409117.1|ENST00000551932|ENSG00000257310|2712|	0.217056	8.47032e-06	0.00062129
ENST00000616300.1|ENSG00000276282.1|OTTHUMG00000186531.1|OTTHUMT00000473296.1|ENST00000616300|ENSG00000276282|666|	0.216867	8.60207e-06	0.000627992
ENST00000662693.1|ENSG00000286964.1|OTTHUMG00000195021.1|OTTHUMT00000523781.1|ENST00000662693|ENSG00000286964|2227|	0.21648	8.87807e-06	0.000645112
ENST00000665984.1|ENSG00000286863.2|OTTHUMG00000195634.1|OTTHUMT00000527908.1|ENST00000665984|ENSG00000286863|4182|	0.216139	9.12855e-06	0.000660228
ENST00000563933.1|ENSG00000260943.1|OTTHUMG00000172895.1|OTTHUMT00000421197.1|LINC02555-201|LINC02555|1951|	0.215929	9.28598e-06	0.000668505
ENST00000624985.1|ENSG00000279214.1|OTTHUMG00000191430.1|OTTHUMT00000487864.1|ENST00000624985|ENSG00000279214|950|	0.215843	9.35168e-06	0.000670132
ENST00000663568.1|ENSG00000287344.1|OTTHUMG00000195769.1|OTTHUMT00000528648.1|ENST00000663568|ENSG00000287344|2185|	0.215732	9.43594e-06	0.000673068
ENST00000504409.3|ENSG00000205056.9|OTTHUMG00000181842.2|OTTHUMT00000407283.2|LINC02397-201|LINC02397|10626|	0.215655	9.49588e-06	0.000674251
ENST00000563129.2|ENSG00000260566.2|OTTHUMG00000177263.2|OTTHUMT00000436062.2|ENST00000563129|ENSG00000260566|2768|	0.215567	9.56406e-06	0.000676005
ENST00000417354.3|ENSG00000230630.5|OTTHUMG00000040855.4|OTTHUMT00000098131.4|DNM3OS-201|DNM3OS|2538|	0.215255	9.8093e-06	0.000690202
ENST00000572358.1|ENSG00000262119.1|OTTHUMG00000170320.1|OTTHUMT00000408500.1|ENST00000572358|ENSG00000262119|1771|	0.214924	1.00767e-05	0.00070269
ENST00000624150.1|ENSG00000278879.1|OTTHUMG00000165536.1|OTTHUMT00000384729.1|ENST00000624150|ENSG00000278879|1937|	0.214905	1.00926e-05	0.00070269
ENST00000610248.1|ENSG00000273402.1|OTTHUMG00000185885.1|OTTHUMT00000471620.1|ENST00000610248|ENSG00000273402|625|	0.214869	1.01224e-05	0.00070269
ENST00000560231.1|ENSG00000259326.1|OTTHUMG00000172380.1|OTTHUMT00000418235.1|ENST00000560231|ENSG00000259326|2129|	0.21476	1.02117e-05	0.000705742
ENST00000624849.1|ENSG00000279320.1|OTTHUMG00000175835.1|OTTHUMT00000431157.1|ENST00000624849|ENSG00000279320|1991|	0.21463	1.03205e-05	0.000710106
ENST00000448901.1|ENSG00000227007.1|OTTHUMG00000151457.1|OTTHUMT00000322744.1|LINC01247-201|LINC01247|4209|	0.214241	1.06509e-05	0.000727888
ENST00000659664.1|ENSG00000286376.1|OTTHUMG00000195308.1|OTTHUMT00000526097.1|ENST00000659664|ENSG00000286376|3388|	0.214216	1.06726e-05	0.000727888
ENST00000692673.1|ENSG00000289089.1|-|-|ENST00000692673|ENSG00000289089|1713|	0.213993	1.08671e-05	0.00073684
ENST00000624393.1|ENSG00000280059.1|OTTHUMG00000175957.1|OTTHUMT00000431313.1|ENST00000624393|ENSG00000280059|3427|	0.213957	1.08986e-05	0.00073684
ENST00000664352.1|ENSG00000286564.1|OTTHUMG00000195457.1|OTTHUMT00000526967.1|ENST00000664352|ENSG00000286564|2132|	0.21381	1.10295e-05	0.000740939
ENST00000624154.1|ENSG00000279104.1|OTTHUMG00000173181.1|OTTHUMT00000422325.1|ENST00000624154|ENSG00000279104|1868|	0.213782	1.10545e-05	0.000740939
ENST00000655749.1|ENSG00000291194.1|-|OTTHUMT00000467714.2|ENST00000655749|ENSG00000291194|6715|	0.213415	1.13877e-05	0.000759524
ENST00000565707.1|ENSG00000260564.2|OTTHUMG00000175493.1|OTTHUMT00000430271.1|ENST00000565707|ENSG00000260564|3007|	0.213369	1.14295e-05	0.000759524
ENST00000654940.1|ENSG00000287290.1|OTTHUMG00000195245.1|OTTHUMT00000525554.1|ENST00000654940|ENSG00000287290|2842|	0.213138	1.16454e-05	0.000770576
ENST00000660627.1|ENSG00000287177.1|OTTHUMG00000195841.1|OTTHUMT00000529004.1|ENST00000660627|ENSG00000287177|4401|	0.21235	1.24093e-05	0.000817644
ENST00000661161.1|ENSG00000225793.5|OTTHUMG00000015048.4|OTTHUMT00000527482.1|TMEM30A-DT-207|TMEM30A-DT|5454|	0.212249	1.25105e-05	0.000820836
ENST00000657137.1|ENSG00000287602.1|OTTHUMG00000195396.1|OTTHUMT00000526752.1|ENST00000657137|ENSG00000287602|2105|	0.212185	1.25755e-05	0.000820953
ENST00000583253.1|ENSG00000266783.1|OTTHUMG00000178364.1|OTTHUMT00000441727.1|ENST00000583253|ENSG00000266783|1049|	0.212108	1.26533e-05	0.000820953
ENST00000662579.1|ENSG00000287783.1|OTTHUMG00000195491.1|OTTHUMT00000527191.1|ENST00000662579|ENSG00000287783|4154|	0.212091	1.26707e-05	0.000820953
ENST00000625075.1|ENSG00000279358.1|OTTHUMG00000186081.1|OTTHUMT00000472220.1|ENST00000625075|ENSG00000279358|2265|	0.211312	1.34901e-05	0.000870419
ENST00000569449.1|ENSG00000260244.1|OTTHUMG00000175885.1|OTTHUMT00000431236.1|ENST00000569449|ENSG00000260244|2615|	0.21112	1.36991e-05	0.000880255
ENST00000636354.1|ENSG00000283213.1|OTTHUMG00000191620.1|OTTHUMT00000488864.1|ENST00000636354|ENSG00000283213|4683|	0.210912	1.39297e-05	0.000891385
ENST00000482985.4|ENSG00000244733.5|OTTHUMG00000018574.4|OTTHUMT00000048978.4|ENST00000482985|ENSG00000244733|1837|	0.210446	1.44601e-05	0.00091895
ENST00000658766.1|ENSG00000241764.5|OTTHUMG00000154805.7|OTTHUMT00000525172.1|CBLL1-AS1-205|CBLL1-AS1|3516|	0.21043	1.44786e-05	0.00091895
ENST00000690581.1|ENSG00000289371.1|-|-|ENST00000690581|ENSG00000289371|1810|	0.210339	1.45839e-05	0.00092187
ENST00000565254.1|ENSG00000261668.1|OTTHUMG00000176114.1|OTTHUMT00000431523.1|ENST00000565254|ENSG00000261668|3843|	0.209924	1.50765e-05	0.00094915
ENST00000623159.1|ENSG00000279032.1|OTTHUMG00000172920.1|OTTHUMT00000421357.1|ENST00000623159|ENSG00000279032|3008|	0.209663	1.53941e-05	0.000965234
ENST00000691922.1|ENSG00000289210.1|-|-|ENST00000691922|ENSG00000289210|2324|	0.209527	1.55621e-05	0.000971848
ENST00000568966.2|ENSG00000260391.2|OTTHUMG00000175759.2|OTTHUMT00000431038.2|ENST00000568966|ENSG00000260391|2538|	0.20939	1.57331e-05	0.000978597
ENST00000622958.1|ENSG00000279401.1|OTTHUMG00000176175.1|OTTHUMT00000431598.1|ENST00000622958|ENSG00000279401|2336|	0.209017	1.62084e-05	0.00100414
ENST00000654434.1|ENSG00000287188.1|OTTHUMG00000195523.1|OTTHUMT00000527373.1|ENST00000654434|ENSG00000287188|2647|	0.208918	1.63376e-05	0.00100813
ENST00000549278.2|ENSG00000246363.4|OTTHUMG00000169910.3|OTTHUMT00000498998.1|LINC02458-202|LINC02458|4177|	0.208865	1.64062e-05	0.00100836
ENST00000666494.1|ENSG00000287389.2|OTTHUMG00000195279.1|OTTHUMT00000525778.1|ENST00000666494|ENSG00000287389|3584|	0.208704	1.66186e-05	0.0010174
ENST00000607056.1|ENSG00000272335.1|OTTHUMG00000185479.1|OTTHUMT00000470586.1|ENST00000607056|ENSG00000272335|2517|	0.208525	1.68571e-05	0.00102795
ENST00000562811.1|ENSG00000260941.1|OTTHUMG00000176048.1|OTTHUMT00000431421.1|LINC00622-201|LINC00622|1570|	0.208468	1.69337e-05	0.00102859
ENST00000624379.1|ENSG00000279511.1|OTTHUMG00000175981.1|OTTHUMT00000431343.1|ENST00000624379|ENSG00000279511|3752|	0.208104	1.74307e-05	0.00105466
ENST00000661103.1|ENSG00000224957.7|OTTHUMG00000154876.4|OTTHUMT00000528599.1|LINC01266-206|LINC01266|4567|	0.208027	1.75377e-05	0.00105702
ENST00000623380.1|ENSG00000279319.1|OTTHUMG00000179033.1|OTTHUMT00000444506.1|ENST00000623380|ENSG00000279319|3095|	0.207946	1.76508e-05	0.00105973
ENST00000606756.1|ENSG00000272472.1|OTTHUMG00000185409.1|OTTHUMT00000470462.1|ENST00000606756|ENSG00000272472|1384|	0.207831	1.78126e-05	0.00106533
ENST00000631132.1|ENSG00000281904.1|OTTHUMG00000189798.1|OTTHUMT00000482360.1|ENST00000631132|ENSG00000281904|1963|	0.207667	1.80467e-05	0.0010752
ENST00000612390.4|ENSG00000234497.5|OTTHUMG00000037896.2|OTTHUMT00000476400.1|ERICH3-AS1-202|ERICH3-AS1|4874|	0.207526	1.82497e-05	0.00108314
ENST00000621248.1|ENSG00000275481.1|OTTHUMG00000187428.1|OTTHUMT00000474944.1|ENST00000621248|ENSG00000275481|3271|	0.20735	1.85064e-05	0.0010854
ENST00000649638.1|ENSG00000285754.1|OTTHUMG00000192896.1|OTTHUMT00000499510.1|ENST00000649638|ENSG00000285754|3389|	0.207291	1.8592e-05	0.0010854
ENST00000664772.1|ENSG00000287650.1|OTTHUMG00000194808.1|OTTHUMT00000522248.1|ENST00000664772|ENSG00000287650|2345|	0.207266	1.86296e-05	0.0010854
ENST00000666695.1|ENSG00000286679.1|OTTHUMG00000195721.1|OTTHUMT00000528419.1|ENST00000666695|ENSG00000286679|5088|	0.207262	1.86362e-05	0.0010854
ENST00000655684.2|ENSG00000227403.3|OTTHUMG00000151885.3|OTTHUMT00000324254.2|LINC01806-203|LINC01806|2441|	0.207254	1.86468e-05	0.0010854
ENST00000623981.1|ENSG00000278950.1|OTTHUMG00000176514.1|OTTHUMT00000432374.1|ENST00000623981|ENSG00000278950|2256|	0.207214	1.87066e-05	0.0010854
ENST00000608771.1|ENSG00000272750.1|OTTHUMG00000185864.2|OTTHUMT00000471560.2|ENST00000608771|ENSG00000272750|2646|	0.206975	1.90639e-05	0.00110192
ENST00000565735.1|ENSG00000261213.1|OTTHUMG00000175853.1|OTTHUMT00000431183.1|ENST00000565735|ENSG00000261213|1410|	0.206929	1.91331e-05	0.00110192
ENST00000698129.1|ENSG00000289740.1|-|-|TALAM1-201|TALAM1|8121|	0.206875	1.92157e-05	0.0011026
ENST00000565390.2|ENSG00000260920.2|OTTHUMG00000175830.2|OTTHUMT00000431151.2|ENST00000565390|ENSG00000260920|2449|	0.206654	1.95553e-05	0.00111796
ENST00000660186.1|ENSG00000285804.2|OTTHUMG00000192631.2|OTTHUMT00000527530.1|ENST00000660186|ENSG00000285804|2047|	0.206234	2.02149e-05	0.00115144
ENST00000635467.1|ENSG00000283053.1|OTTHUMG00000191588.1|OTTHUMT00000488690.1|ENST00000635467|ENSG00000283053|1469|	0.206081	2.04614e-05	0.00115838
ENST00000670456.1|ENSG00000286501.1|OTTHUMG00000195845.1|OTTHUMT00000529017.1|ENST00000670456|ENSG00000286501|2949|	0.206065	2.04858e-05	0.00115838
ENST00000565297.2|ENSG00000261618.2|OTTHUMG00000173421.2|OTTHUMT00000423044.2|LINC02605-201|LINC02605|5219|	0.205852	2.08342e-05	0.00117381
ENST00000667150.1|ENSG00000225579.2|OTTHUMG00000017113.2|OTTHUMT00000521370.1|EDNRB-AS1-203|EDNRB-AS1|3780|	0.205716	2.10596e-05	0.00117829
ENST00000624148.1|ENSG00000279089.1|OTTHUMG00000177540.1|OTTHUMT00000437460.1|ENST00000624148|ENSG00000279089|3213|	0.205697	2.10903e-05	0.00117829
ENST00000439913.1|ENSG00000234864.2|OTTHUMG00000018018.2|OTTHUMT00000047688.1|LINC02632-201|LINC02632|3965|	0.205667	2.11411e-05	0.00117829
ENST00000564237.2|ENSG00000290792.1|-|OTTHUMT00000498321.1|ENST00000564237|ENSG00000290792|6440|	0.205472	2.14674e-05	0.00119221
ENST00000647864.1|ENSG00000285561.1|OTTHUMG00000192985.1|OTTHUMT00000499781.1|ENST00000647864|ENSG00000285561|4976|	0.205101	2.2104e-05	0.00121933
ENST00000563205.1|ENSG00000260912.1|OTTHUMG00000175502.1|OTTHUMT00000430280.1|ENST00000563205|ENSG00000260912|1965|	0.205096	2.21127e-05	0.00121933
ENST00000630034.1|ENSG00000280660.1|OTTHUMG00000189680.1|OTTHUMT00000480271.1|ENST00000630034|ENSG00000280660|8444|	0.204942	2.23821e-05	0.0012261
ENST00000624021.1|ENSG00000280009.1|OTTHUMG00000162792.1|OTTHUMT00000370408.1|ENST00000624021|ENSG00000280009|917|	0.204936	2.23931e-05	0.0012261
ENST00000650487.1|ENSG00000285732.1|OTTHUMG00000192667.1|OTTHUMT00000498789.1|ENST00000650487|ENSG00000285732|2503|	0.204822	2.25956e-05	0.00123285
ENST00000638218.1|ENSG00000279530.2|OTTHUMG00000192035.1|OTTHUMT00000492067.1|ENST00000638218|ENSG00000279530|2733|	0.204658	2.28877e-05	0.00124432
ENST00000578427.1|ENSG00000264707.1|OTTHUMG00000178852.1|OTTHUMT00000443624.1|L3MBTL4-AS1-201|L3MBTL4-AS1|2044|	0.204615	2.2966e-05	0.00124432
ENST00000667527.2|ENSG00000250266.3|OTTHUMG00000160893.7|OTTHUMT00000518663.1|LINC01612-206|LINC01612|2474|	0.204142	2.38353e-05	0.00128273
ENST00000666784.1|ENSG00000287063.1|OTTHUMG00000195012.1|OTTHUMT00000523727.1|ENST00000666784|ENSG00000287063|3170|	0.204139	2.38399e-05	0.00128273
ENST00000659033.1|ENSG00000286953.1|OTTHUMG00000195503.1|OTTHUMT00000527241.1|ENST00000659033|ENSG00000286953|3635|	0.204064	2.39804e-05	0.00128585
ENST00000512149.3|ENSG00000290879.1|-|OTTHUMT00000431782.2|ENST00000512149|ENSG00000290879|5482|	0.203988	2.41253e-05	0.00128917
ENST00000651142.1|ENSG00000286238.1|OTTHUMG00000193004.1|OTTHUMT00000499865.1|ENST00000651142|ENSG00000286238|2539|	0.203826	2.44338e-05	0.00129348
ENST00000623567.1|ENSG00000279013.1|OTTHUMG00000176035.1|OTTHUMT00000431408.1|ENST00000623567|ENSG00000279013|2018|	0.203779	2.45231e-05	0.00129348
ENST00000696488.1|ENSG00000289709.1|-|-|ENST00000696488|ENSG00000289709|5113|	0.203773	2.45343e-05	0.00129348
ENST00000690714.1|ENSG00000289045.1|-|-|ENST00000690714|ENSG00000289045|612|	0.203771	2.45386e-05	0.00129348
ENST00000649594.1|ENSG00000285798.1|OTTHUMG00000193013.1|OTTHUMT00000499894.1|ENST00000649594|ENSG00000285798|1759|	0.203573	2.49229e-05	0.00130929
ENST00000624119.1|ENSG00000279034.1|OTTHUMG00000176176.1|OTTHUMT00000431599.1|ENST00000624119|ENSG00000279034|3569|	0.203416	2.52303e-05	0.00132098
ENST00000652806.1|ENSG00000231238.2|OTTHUMG00000016451.2|OTTHUMT00000508877.1|LINC00349-202|LINC00349|1169|	0.20337	2.53213e-05	0.0013213
ENST00000651539.1|ENSG00000286099.1|OTTHUMG00000193485.1|OTTHUMT00000502113.1|ENST00000651539|ENSG00000286099|4839|	0.203315	2.54302e-05	0.00132254
ENST00000624649.1|ENSG00000279453.1|OTTHUMG00000175939.1|OTTHUMT00000431293.1|ENST00000624649|ENSG00000279453|2435|	0.203072	2.59193e-05	0.00134348
ENST00000661535.1|ENSG00000287919.1|OTTHUMG00000195797.1|OTTHUMT00000528798.1|ENST00000661535|ENSG00000287919|2726|	0.202849	2.63755e-05	0.00136259
ENST00000657332.1|ENSG00000287554.1|OTTHUMG00000195293.1|OTTHUMT00000525980.1|ENST00000657332|ENSG00000287554|3376|	0.202758	2.6562e-05	0.00136768
ENST00000624662.1|ENSG00000280372.1|OTTHUMG00000189483.1|OTTHUMT00000479778.1|ENST00000624662|ENSG00000280372|1495|	0.202342	2.7439e-05	0.00140817
ENST00000671127.1|ENSG00000258162.4|OTTHUMG00000170247.5|OTTHUMT00000525229.1|ENST00000671127|ENSG00000258162|3351|	0.202255	2.76262e-05	0.00141145
ENST00000648975.1|ENSG00000285616.1|OTTHUMG00000192640.1|OTTHUMT00000498246.1|ENST00000648975|ENSG00000285616|3529|	0.202228	2.76845e-05	0.00141145
ENST00000656336.1|ENSG00000258081.4|OTTHUMG00000170435.4|OTTHUMT00000523559.1|ENST00000656336|ENSG00000258081|3236|	0.201803	2.86172e-05	0.00144963
ENST00000665170.1|ENSG00000286635.1|OTTHUMG00000195307.1|OTTHUMT00000526081.1|ENST00000665170|ENSG00000286635|2861|	0.201802	2.86197e-05	0.00144963
ENST00000663941.1|ENSG00000241231.2|OTTHUMG00000158223.9|OTTHUMT00000528823.1|ENST00000663941|ENSG00000241231|1757|	0.201604	2.90647e-05	0.00146739
ENST00000664446.1|ENSG00000287032.1|OTTHUMG00000195117.1|OTTHUMT00000524574.1|ENST00000664446|ENSG00000287032|2689|	0.201492	2.93181e-05	0.00147539
ENST00000657188.1|ENSG00000286766.1|OTTHUMG00000195575.1|OTTHUMT00000527578.1|ENST00000657188|ENSG00000286766|2561|	0.20135	2.96434e-05	0.00148695
ENST00000669567.1|ENSG00000247877.8|OTTHUMG00000162801.2|OTTHUMT00000527080.1|FAM174A-DT-203|FAM174A-DT|1954|	0.20125	2.9875e-05	0.00149375
ENST00000650504.1|ENSG00000285742.1|OTTHUMG00000193063.1|OTTHUMT00000500048.1|ENST00000650504|ENSG00000285742|1042|	0.201208	2.99726e-05	0.00149383
ENST00000565815.1|ENSG00000261206.1|OTTHUMG00000176038.1|OTTHUMT00000431411.1|LINC00561-201|LINC00561|2738|	0.201118	3.01833e-05	0.00149952
ENST00000655242.1|ENSG00000287320.1|OTTHUMG00000195563.1|OTTHUMT00000527556.1|ENST00000655242|ENSG00000287320|2514|	0.200805	3.09265e-05	0.00153155
ENST00000689524.1|ENSG00000289396.1|-|-|ENST00000689524|ENSG00000289396|1463|	0.200413	3.18798e-05	0.00157375
ENST00000689527.1|ENSG00000289433.1|-|-|ENST00000689527|ENSG00000289433|2301|	0.200335	3.20729e-05	0.00157827
ENST00000651732.1|ENSG00000286097.1|OTTHUMG00000192928.1|OTTHUMT00000499608.1|ENST00000651732|ENSG00000286097|1897|	0.200246	3.22954e-05	0.00158421
ENST00000687429.1|ENSG00000289283.1|-|-|ENST00000687429|ENSG00000289283|1309|	0.200086	3.26979e-05	0.00159891
ENST00000688255.1|ENSG00000288899.1|-|-|ENST00000688255|ENSG00000288899|881|	0.199706	3.36742e-05	0.00164114
ENST00000656024.1|ENSG00000227354.7|OTTHUMG00000017131.5|OTTHUMT00000521796.1|RBM26-AS1-206|RBM26-AS1|4770|	0.199651	3.38176e-05	0.00164114
ENST00000441587.3|ENSG00000230002.3|OTTHUMG00000152785.3|OTTHUMT00000327862.3|ALMS1-IT1-201|ALMS1-IT1|2105|	0.199628	3.38782e-05	0.00164114
ENST00000660031.1|ENSG00000287692.1|OTTHUMG00000195568.1|OTTHUMT00000527564.1|ENST00000660031|ENSG00000287692|4507|	0.199514	3.41783e-05	0.00165054
ENST00000623193.1|ENSG00000279099.1|OTTHUMG00000163984.1|OTTHUMT00000376637.1|ENST00000623193|ENSG00000279099|2262|	0.199274	3.48174e-05	0.00167619
ENST00000431979.1|ENSG00000224559.2|OTTHUMG00000153621.1|OTTHUMT00000331858.1|LINC01087-201|LINC01087|3516|	0.199154	3.51403e-05	0.00168652
ENST00000659528.3|ENSG00000233184.9|OTTHUMG00000010831.10|OTTHUMT00000528395.1|DPH5-DT-215|DPH5-DT|3992|	0.199	3.55619e-05	0.0017015
ENST00000602835.1|ENSG00000270096.1|OTTHUMG00000184030.1|OTTHUMT00000467808.1|ENST00000602835|ENSG00000270096|1252|	0.198879	3.58932e-05	0.00171208
ENST00000607540.1|ENSG00000271894.1|OTTHUMG00000185573.1|OTTHUMT00000470755.1|ENST00000607540|ENSG00000271894|2289|	0.198834	3.60193e-05	0.00171284
ENST00000667612.1|ENSG00000287552.1|OTTHUMG00000195557.1|OTTHUMT00000527538.1|ENST00000667612|ENSG00000287552|2968|	0.198772	3.61919e-05	0.0017158
ENST00000659676.1|ENSG00000286319.1|OTTHUMG00000195070.1|OTTHUMT00000524227.1|ENST00000659676|ENSG00000286319|2138|	0.198716	3.6349e-05	0.00171802
ENST00000561632.2|ENSG00000259937.2|OTTHUMG00000176816.2|OTTHUMT00000433919.2|ENST00000561632|ENSG00000259937|1025|	0.198535	3.6858e-05	0.00173679
ENST00000371086.3|ENSG00000116652.6|OTTHUMG00000008984.3|OTTHUMT00000024916.3|DLEU2L-201|DLEU2L|3555|	0.198319	3.74769e-05	0.00176062
ENST00000520314.2|ENSG00000290469.1|-|OTTHUMT00000381543.3|ENST00000520314|ENSG00000290469|7870|	0.198248	3.76838e-05	0.00176501
ENST00000686410.1|ENSG00000289502.1|-|-|ENST00000686410|ENSG00000289502|693|	0.198045	3.82758e-05	0.00178735
ENST00000626230.2|ENSG00000280809.5|OTTHUMG00000189579.4|OTTHUMT00000480001.1|LINC00836-202|LINC00836|1640|	0.197978	3.84747e-05	0.00179126
ENST00000665650.1|ENSG00000227373.6|OTTHUMG00000034822.3|OTTHUMT00000084251.3|RABGAP1L-DT-207|RABGAP1L-DT|5901|	0.197848	3.88591e-05	0.00180376
ENST00000431554.2|ENSG00000236740.6|OTTHUMG00000014887.3|OTTHUMT00000040975.3|ENST00000431554|ENSG00000236740|3104|	0.197787	3.90411e-05	0.00180681
ENST00000642028.1|ENSG00000290695.1|-|OTTHUMT00000493478.1|ENST00000642028|ENSG00000290695|5216|	0.197699	3.93064e-05	0.00181369
ENST00000654189.1|ENSG00000287796.1|OTTHUMG00000195043.1|OTTHUMT00000523934.1|ENST00000654189|ENSG00000287796|3691|	0.19757	3.96988e-05	0.00182101
ENST00000702478.1|ENSG00000291133.1|-|-|ENST00000702478|ENSG00000291133|3458|	0.19757	3.96991e-05	0.00182101
ENST00000621575.1|ENSG00000276672.1|OTTHUMG00000187333.1|OTTHUMT00000474777.1|ENST00000621575|ENSG00000276672|4636|	0.197251	4.06813e-05	0.00186057
ENST00000662638.1|ENSG00000287134.1|OTTHUMG00000195633.1|OTTHUMT00000527904.1|ENST00000662638|ENSG00000287134|4161|	0.196751	4.22701e-05	0.00192114
ENST00000648143.1|ENSG00000285523.1|OTTHUMG00000192989.1|OTTHUMT00000499802.1|ENST00000648143|ENSG00000285523|2908|	0.19672	4.23713e-05	0.00192114
ENST00000504046.1|ENSG00000249153.1|OTTHUMG00000162794.1|OTTHUMT00000370410.1|ENST00000504046|ENSG00000249153|698|	0.19669	4.247e-05	0.00192114
ENST00000692151.1|ENSG00000288794.1|-|-|ENST00000692151|ENSG00000288794|1536|	0.19668	4.24998e-05	0.00192114
ENST00000615671.2|ENSG00000285410.1|OTTHUMG00000192411.1|OTTHUMT00000493899.1|GABPB1-IT1-201|GABPB1-IT1|5926|	0.196375	4.35059e-05	0.00195341
ENST00000623116.1|ENSG00000279544.1|OTTHUMG00000188160.1|OTTHUMT00000476394.1|ENST00000623116|ENSG00000279544|3109|	0.196354	4.35742e-05	0.00195341
ENST00000620192.1|ENSG00000260337.4|OTTHUMG00000173074.5|OTTHUMT00000422054.2|ENST00000620192|ENSG00000260337|3815|	0.196349	4.35905e-05	0.00195341
ENST00000624363.1|ENSG00000279114.1|OTTHUMG00000185408.1|OTTHUMT00000470459.1|ENST00000624363|ENSG00000279114|6430|	0.196311	4.37164e-05	0.00195342
ENST00000567832.1|ENSG00000260855.1|OTTHUMG00000176476.1|OTTHUMT00000432176.1|ENST00000567832|ENSG00000260855|3472|	0.196177	4.41664e-05	0.00196787
ENST00000569835.1|ENSG00000261542.1|OTTHUMG00000173254.1|OTTHUMT00000422619.1|ENST00000569835|ENSG00000261542|2054|	0.196087	4.44724e-05	0.00197584
ENST00000647772.1|ENSG00000285961.1|OTTHUMG00000192738.1|OTTHUMT00000498982.1|ENST00000647772|ENSG00000285961|2720|	0.195972	4.48659e-05	0.00198002
ENST00000565581.1|ENSG00000261529.1|OTTHUMG00000176881.1|OTTHUMT00000434205.1|ENST00000565581|ENSG00000261529|1603|	0.19595	4.49409e-05	0.00198002
ENST00000653485.1|ENSG00000287700.3|OTTHUMG00000194685.1|OTTHUMT00000520718.1|ENST00000653485|ENSG00000287700|2809|	0.195948	4.49484e-05	0.00198002
ENST00000590024.1|ENSG00000267784.1|OTTHUMG00000180308.1|OTTHUMT00000450684.1|ENST00000590024|ENSG00000267784|3590|	0.195904	4.50981e-05	0.001981
ENST00000638898.1|ENSG00000279342.2|OTTHUMG00000192034.1|OTTHUMT00000492066.1|ENST00000638898|ENSG00000279342|3579|	0.19582	4.53892e-05	0.00198817
ENST00000661918.1|ENSG00000225265.2|OTTHUMG00000037542.4|OTTHUMT00000527963.1|TAF1A-AS1-204|TAF1A-AS1|2121|	0.195748	4.56376e-05	0.00199172
ENST00000641232.1|ENSG00000290752.1|-|OTTHUMT00000493426.1|ENST00000641232|ENSG00000290752|2744|	0.195723	4.57263e-05	0.00199172
ENST00000515343.1|ENSG00000251152.1|OTTHUMG00000160040.1|OTTHUMT00000358985.1|ENST00000515343|ENSG00000251152|4019|	0.195669	4.59145e-05	0.00199433
ENST00000623488.1|ENSG00000278958.1|OTTHUMG00000163150.1|OTTHUMT00000371853.1|ENST00000623488|ENSG00000278958|728|	0.195532	4.63956e-05	0.00200962
ENST00000656637.1|ENSG00000228358.7|OTTHUMG00000059445.17|OTTHUMT00000525033.1|LINC02263-210|LINC02263|2571|	0.19533	4.71171e-05	0.00203017
ENST00000658843.2|ENSG00000233797.4|OTTHUMG00000015237.2|OTTHUMT00000527313.1|UFL1-AS1-203|UFL1-AS1|3477|	0.195326	4.71312e-05	0.00203017
ENST00000688186.1|ENSG00000289357.1|-|-|ENST00000688186|ENSG00000289357|957|	0.195209	4.75542e-05	0.00204273
ENST00000689728.1|ENSG00000288802.1|-|-|ENST00000689728|ENSG00000288802|3035|	0.194999	4.83176e-05	0.0020698
ENST00000618815.1|ENSG00000275426.1|OTTHUMG00000188626.1|OTTHUMT00000477760.1|ENST00000618815|ENSG00000275426|580|	0.194947	4.85111e-05	0.00207238
ENST00000624954.1|ENSG00000279657.1|OTTHUMG00000176033.1|OTTHUMT00000431406.1|ENST00000624954|ENSG00000279657|3425|	0.194867	4.8808e-05	0.00207935
ENST00000569134.1|ENSG00000260317.1|OTTHUMG00000174444.1|OTTHUMT00000426635.1|LINC02986-201|LINC02986|1805|	0.194723	4.93462e-05	0.00208751
ENST00000460586.1|ENSG00000241328.1|OTTHUMG00000158995.1|OTTHUMT00000352831.1|LINC02070-201|LINC02070|1321|	0.194684	4.9492e-05	0.00208751
ENST00000643016.1|ENSG00000284848.2|OTTHUMG00000168496.15|OTTHUMT00000494395.1|LINC02359-203|LINC02359|5493|	0.194639	4.96605e-05	0.00208751
ENST00000641216.1|ENSG00000284664.1|OTTHUMG00000192273.1|OTTHUMT00000493250.1|ENST00000641216|ENSG00000284664|2071|	0.194637	4.96679e-05	0.00208751
ENST00000655369.1|ENSG00000286666.1|OTTHUMG00000195642.1|OTTHUMT00000527938.1|ENST00000655369|ENSG00000286666|3791|	0.194636	4.96706e-05	0.00208751
ENST00000649672.1|ENSG00000285748.2|OTTHUMG00000193001.2|OTTHUMT00000499857.1|ENST00000649672|ENSG00000285748|3249|	0.194345	5.07815e-05	0.00212844
ENST00000648178.1|ENSG00000285598.1|OTTHUMG00000192799.1|OTTHUMT00000499173.1|ENST00000648178|ENSG00000285598|3847|	0.194278	5.10417e-05	0.0021336
ENST00000567327.1|ENSG00000260742.1|OTTHUMG00000176262.1|OTTHUMT00000431694.1|ITPRID2-DT-201|ITPRID2-DT|3813|	0.194151	5.15355e-05	0.00214623
ENST00000660854.1|ENSG00000286541.1|OTTHUMG00000194272.1|OTTHUMT00000513641.1|ENST00000660854|ENSG00000286541|1531|	0.194129	5.162e-05	0.00214623
ENST00000654516.1|ENSG00000287900.1|OTTHUMG00000153808.2|OTTHUMT00000528897.1|ENST00000654516|ENSG00000287900|3954|	0.194021	5.2048e-05	0.00215826
ENST00000623674.1|ENSG00000279166.1|OTTHUMG00000187625.1|OTTHUMT00000475371.1|ENST00000623674|ENSG00000279166|2614|	0.193833	5.2794e-05	0.00218337
ENST00000606924.1|ENSG00000272341.1|OTTHUMG00000185677.1|OTTHUMT00000470976.1|ENST00000606924|ENSG00000272341|2538|	0.193737	5.31802e-05	0.00218975
ENST00000610193.1|ENSG00000273489.1|OTTHUMG00000186336.1|OTTHUMT00000472962.1|ENST00000610193|ENSG00000273489|3731|	0.193724	5.32299e-05	0.00218975
ENST00000556738.1|ENSG00000258768.2|OTTHUMG00000178843.1|OTTHUMT00000443563.1|ENST00000556738|ENSG00000258768|3829|	0.193664	5.34745e-05	0.00219401
ENST00000420572.2|ENSG00000233358.2|OTTHUMG00000014348.2|OTTHUMT00000039995.2|ENST00000420572|ENSG00000233358|871|	0.19361	5.36923e-05	0.00219715
ENST00000652566.1|ENSG00000286241.1|OTTHUMG00000192743.1|OTTHUMT00000498990.1|ENST00000652566|ENSG00000286241|3870|	0.193536	5.39945e-05	0.00220371
ENST00000652012.1|ENSG00000286208.1|OTTHUMG00000193314.1|OTTHUMT00000500697.1|ENST00000652012|ENSG00000286208|4030|	0.193344	5.47873e-05	0.00223022
ENST00000623178.1|ENSG00000278959.1|OTTHUMG00000173369.1|OTTHUMT00000422907.1|ENST00000623178|ENSG00000278959|2476|	0.193247	5.51885e-05	0.00224068
ENST00000652653.1|ENSG00000286049.1|OTTHUMG00000192803.1|OTTHUMT00000499203.1|ENST00000652653|ENSG00000286049|1837|	0.193209	5.53485e-05	0.00224132
ENST00000667165.1|ENSG00000287176.1|OTTHUMG00000195437.1|OTTHUMT00000526886.1|ENST00000667165|ENSG00000287176|2032|	0.193084	5.5872e-05	0.00225665
ENST00000660341.2|ENSG00000281649.3|OTTHUMG00000019910.17|OTTHUMT00000520545.1|EBLN3P-215|EBLN3P|4967|	0.192842	5.69032e-05	0.0022867
ENST00000606030.1|ENSG00000272108.1|OTTHUMG00000185595.1|OTTHUMT00000470804.1|ENST00000606030|ENSG00000272108|2086|	0.192822	5.6992e-05	0.0022867
ENST00000665670.2|ENSG00000167912.8|OTTHUMG00000164333.2|OTTHUMT00000527684.1|TOX-DT-205|TOX-DT|3213|	0.192807	5.70573e-05	0.0022867
ENST00000518973.1|ENSG00000253288.2|OTTHUMG00000164173.4|OTTHUMT00000377596.2|ENST00000518973|ENSG00000253288|4171|	0.192583	5.80287e-05	0.00231587
ENST00000649871.1|ENSG00000285851.1|OTTHUMG00000193362.2|OTTHUMT00000500962.1|ENST00000649871|ENSG00000285851|2686|	0.192571	5.80829e-05	0.00231587
ENST00000623374.1|ENSG00000277991.4|OTTHUMG00000189411.1|OTTHUMT00000479629.1|ENST00000623374|ENSG00000277991|7632|	0.192401	5.88299e-05	0.00233684
ENST00000608335.1|ENSG00000272983.1|OTTHUMG00000186215.1|OTTHUMT00000472430.1|ENST00000608335|ENSG00000272983|7063|	0.192383	5.89094e-05	0.00233684
ENST00000623582.1|ENSG00000279364.1|OTTHUMG00000172290.1|OTTHUMT00000417686.1|ENST00000623582|ENSG00000279364|1734|	0.192212	5.96753e-05	0.00235651
ENST00000667623.1|ENSG00000286582.1|OTTHUMG00000194998.1|OTTHUMT00000523623.1|ENST00000667623|ENSG00000286582|2618|	0.192205	5.97083e-05	0.00235651
ENST00000614629.1|ENSG00000275248.1|OTTHUMG00000187251.1|OTTHUMT00000474642.1|ENST00000614629|ENSG00000275248|552|	0.19217	5.98631e-05	0.00235664
ENST00000658112.1|ENSG00000286285.1|OTTHUMG00000195714.1|OTTHUMT00000528382.1|ENST00000658112|ENSG00000286285|3949|	0.191996	6.06531e-05	0.00238171
ENST00000504861.2|ENSG00000248858.7|OTTHUMG00000164159.1|OTTHUMT00000377517.1|FLJ46284-201|FLJ46284|3421|	0.191709	6.19801e-05	0.00242768
ENST00000562242.1|ENSG00000261451.1|OTTHUMG00000163781.2|OTTHUMT00000375444.2|ENST00000562242|ENSG00000261451|4641|	0.191498	6.29695e-05	0.00245988
ENST00000591222.1|ENSG00000267731.1|OTTHUMG00000180173.1|OTTHUMT00000450105.1|ENST00000591222|ENSG00000267731|2919|	0.191467	6.31186e-05	0.00245988
ENST00000562082.1|ENSG00000260400.1|OTTHUMG00000176181.1|OTTHUMT00000431604.1|ENST00000562082|ENSG00000260400|2295|	0.191421	6.33333e-05	0.00246208
ENST00000614959.1|ENSG00000277797.1|OTTHUMG00000187096.1|OTTHUMT00000474408.1|ENST00000614959|ENSG00000277797|2407|	0.191095	6.49068e-05	0.00251696
ENST00000641941.1|ENSG00000223914.5|OTTHUMG00000059745.6|OTTHUMT00000493109.1|LINC02471-202|LINC02471|4752|	0.191044	6.51557e-05	0.00252032
ENST00000667923.1|ENSG00000287645.1|OTTHUMG00000195780.1|OTTHUMT00000528714.1|ENST00000667923|ENSG00000287645|2506|	0.190903	6.585e-05	0.00254086
ENST00000659278.1|ENSG00000287109.1|OTTHUMG00000194645.1|OTTHUMT00000520282.1|ENST00000659278|ENSG00000287109|3590|	0.1908	6.63602e-05	0.00255421
ENST00000548575.1|ENSG00000257431.1|OTTHUMG00000170255.1|OTTHUMT00000408205.1|ENST00000548575|ENSG00000257431|3141|	0.190624	6.72377e-05	0.0025789
ENST00000686188.1|ENSG00000262198.2|OTTHUMG00000177836.1|-|ENST00000686188|ENSG00000262198|2563|	0.190606	6.73333e-05	0.0025789
ENST00000623586.3|ENSG00000290438.1|-|OTTHUMT00000479335.1|ENST00000623586|ENSG00000290438|3260|	0.19056	6.75633e-05	0.00257901
ENST00000668551.1|ENSG00000227082.3|OTTHUMG00000188235.4|OTTHUMT00000528225.1|LINC02798-205|LINC02798|3809|	0.190539	6.7668e-05	0.00257901
ENST00000561542.1|ENSG00000259994.1|OTTHUMG00000176157.1|OTTHUMT00000431578.1|ENST00000561542|ENSG00000259994|3241|	0.190495	6.78932e-05	0.00258127
ENST00000668097.1|ENSG00000287520.1|OTTHUMG00000195492.1|OTTHUMT00000527195.1|ENST00000668097|ENSG00000287520|4242|	0.190246	6.91732e-05	0.00262029
ENST00000662470.1|ENSG00000287844.1|OTTHUMG00000195020.1|OTTHUMT00000523778.1|ENST00000662470|ENSG00000287844|1981|	0.190208	6.93676e-05	0.00262029
ENST00000687345.1|ENSG00000289613.1|-|-|ENST00000687345|ENSG00000289613|1194|	0.190197	6.94252e-05	0.00262029
ENST00000578539.1|ENSG00000264853.1|OTTHUMG00000179609.1|OTTHUMT00000447300.1|ENST00000578539|ENSG00000264853|2790|	0.189984	7.05406e-05	0.00265595
ENST00000646875.1|ENSG00000285079.1|OTTHUMG00000192361.1|OTTHUMT00000493730.1|ENST00000646875|ENSG00000285079|2316|	0.18973	7.18942e-05	0.00270037
ENST00000668718.1|ENSG00000286625.1|OTTHUMG00000195400.1|OTTHUMT00000526772.1|ENST00000668718|ENSG00000286625|2149|	0.189658	7.22776e-05	0.00270699
ENST00000451707.1|ENSG00000235158.1|OTTHUMG00000154883.1|OTTHUMT00000337493.1|ENST00000451707|ENSG00000235158|3699|	0.189632	7.24185e-05	0.00270699
ENST00000556405.1|ENSG00000258998.2|OTTHUMG00000170717.3|OTTHUMT00000410081.1|LINC02302-201|LINC02302|2904|	0.189507	7.30977e-05	0.00272475
ENST00000686437.1|ENSG00000289401.1|-|-|ENST00000686437|ENSG00000289401|700|	0.189481	7.32441e-05	0.00272475
ENST00000567769.1|ENSG00000261501.1|OTTHUMG00000176031.1|OTTHUMT00000431404.1|BBS7-DT-201|BBS7-DT|2266|	0.189449	7.34195e-05	0.00272476
ENST00000658444.1|ENSG00000244055.2|OTTHUMG00000155862.3|OTTHUMT00000524708.1|ENST00000658444|ENSG00000244055|4933|	0.189276	7.43714e-05	0.00275351
ENST00000510049.1|ENSG00000249792.1|OTTHUMG00000162786.1|OTTHUMT00000370388.1|ENST00000510049|ENSG00000249792|657|	0.189215	7.47111e-05	0.00275952
ENST00000648197.1|ENSG00000285638.1|OTTHUMG00000192938.1|OTTHUMT00000499642.1|ENST00000648197|ENSG00000285638|2438|	0.18908	7.54664e-05	0.00277845
ENST00000435884.2|ENSG00000225386.2|OTTHUMG00000155650.2|OTTHUMT00000340978.2|LRRC3B-AS1-201|LRRC3B-AS1|5776|	0.189052	7.56223e-05	0.00277845
ENST00000668194.1|ENSG00000287671.1|OTTHUMG00000195190.1|OTTHUMT00000525178.1|ENST00000668194|ENSG00000287671|7037|	0.189028	7.57596e-05	0.00277845
ENST00000505348.1|ENSG00000248195.1|OTTHUMG00000162791.1|OTTHUMT00000370407.1|ENST00000505348|ENSG00000248195|785|	0.188821	7.69369e-05	0.00281499
ENST00000689443.1|ENSG00000288832.1|-|-|ENST00000689443|ENSG00000288832|1647|	0.188772	7.72175e-05	0.00281862
ENST00000554257.1|ENSG00000259091.1|OTTHUMG00000170594.2|OTTHUMT00000409761.2|LINC00517-202|LINC00517|3460|	0.188661	7.78561e-05	0.00282671
ENST00000567714.1|ENSG00000261051.1|OTTHUMG00000175832.1|OTTHUMT00000431153.1|ENST00000567714|ENSG00000261051|2095|	0.188651	7.79136e-05	0.00282671
ENST00000662448.1|ENSG00000287367.2|OTTHUMG00000195295.1|OTTHUMT00000525988.1|ENST00000662448|ENSG00000287367|4924|	0.188639	7.79845e-05	0.00282671
ENST00000622162.1|ENSG00000276842.1|OTTHUMG00000187127.1|OTTHUMT00000474461.1|ENST00000622162|ENSG00000276842|746|	0.188579	7.83347e-05	0.0028328
ENST00000691291.1|ENSG00000288876.1|-|-|ENST00000691291|ENSG00000288876|1287|	0.188375	7.95349e-05	0.00286953
ENST00000654821.1|ENSG00000287378.1|OTTHUMG00000195663.1|OTTHUMT00000528139.1|ENST00000654821|ENSG00000287378|2086|	0.188133	8.09749e-05	0.00291472
ENST00000659342.1|ENSG00000287962.1|OTTHUMG00000195102.1|OTTHUMT00000524471.1|ENST00000659342|ENSG00000287962|2525|	0.188034	8.15769e-05	0.00292961
ENST00000561473.1|ENSG00000261462.1|OTTHUMG00000173164.1|OTTHUMT00000422296.1|ENST00000561473|ENSG00000261462|1744|	0.187849	8.2705e-05	0.00295995
ENST00000623489.1|ENSG00000280077.1|OTTHUMG00000188613.1|OTTHUMT00000477734.1|ENST00000623489|ENSG00000280077|1903|	0.187831	8.28135e-05	0.00295995
ENST00000418968.5|ENSG00000236841.8|OTTHUMG00000153891.5|OTTHUMT00000332859.5|ENST00000418968|ENSG00000236841|4126|	0.187802	8.29927e-05	0.00295995
ENST00000569111.1|ENSG00000261298.1|OTTHUMG00000176300.1|OTTHUMT00000431737.1|ENST00000569111|ENSG00000261298|1201|	0.187361	8.57498e-05	0.00305026
ENST00000560066.1|ENSG00000291191.1|-|OTTHUMT00000417595.1|OR4F13P-202|OR4F13P|2054|	0.187335	8.59174e-05	0.00305026
ENST00000440955.1|ENSG00000224294.1|OTTHUMG00000021384.1|OTTHUMT00000056297.1|PINCR-201|PINCR|2228|	0.187255	8.64268e-05	0.00306136
ENST00000659320.1|ENSG00000286784.1|OTTHUMG00000195469.1|OTTHUMT00000527082.1|ENST00000659320|ENSG00000286784|1657|	0.187188	8.68556e-05	0.00306617
ENST00000684947.2|ENSG00000288947.2|-|-|ENST00000684947|ENSG00000288947|2206|	0.187172	8.69569e-05	0.00306617
ENST00000689282.2|ENSG00000289475.2|-|-|ENST00000689282|ENSG00000289475|2228|	0.18714	8.71617e-05	0.00306643
ENST00000623815.1|ENSG00000279403.1|OTTHUMG00000175932.1|OTTHUMT00000431286.1|ENST00000623815|ENSG00000279403|1166|	0.187031	8.78721e-05	0.00308445
ENST00000570140.1|ENSG00000261799.1|OTTHUMG00000172900.1|OTTHUMT00000421260.1|ENST00000570140|ENSG00000261799|3170|	0.186925	8.85649e-05	0.00310177
ENST00000666285.1|ENSG00000287880.1|OTTHUMG00000194781.1|OTTHUMT00000521916.1|ENST00000666285|ENSG00000287880|1236|	0.186821	8.92435e-05	0.00311482
ENST00000686249.1|ENSG00000289013.1|-|-|ENST00000686249|ENSG00000289013|2105|	0.186807	8.93383e-05	0.00311482
ENST00000641424.1|ENSG00000290650.1|-|OTTHUMT00000493223.1|ENST00000641424|ENSG00000290650|3046|	0.186691	9.0108e-05	0.00313463
ENST00000623934.1|ENSG00000279326.1|OTTHUMG00000173137.1|OTTHUMT00000422243.1|ENST00000623934|ENSG00000279326|2209|	0.186449	9.17303e-05	0.00317405
ENST00000585065.1|ENSG00000264112.1|OTTHUMG00000178780.1|OTTHUMT00000443327.1|ENST00000585065|ENSG00000264112|4722|	0.186434	9.18353e-05	0.00317405
ENST00000609827.1|ENSG00000272604.1|OTTHUMG00000186297.1|OTTHUMT00000472786.1|ENST00000609827|ENSG00000272604|2578|	0.186431	9.18537e-05	0.00317405
ENST00000660823.1|ENSG00000287989.1|OTTHUMG00000195715.1|OTTHUMT00000528384.1|ENST00000660823|ENSG00000287989|2417|	0.186349	9.24152e-05	0.00318136
ENST00000689708.1|ENSG00000288948.1|-|-|ENST00000689708|ENSG00000288948|2246|	0.18634	9.24743e-05	0.00318136
ENST00000657544.1|ENSG00000286512.1|OTTHUMG00000195562.1|OTTHUMT00000527554.1|ENST00000657544|ENSG00000286512|3542|	0.186072	9.4323e-05	0.0032357
ENST00000613826.1|ENSG00000277687.1|OTTHUMG00000186562.1|OTTHUMT00000473353.1|ENST00000613826|ENSG00000277687|1175|	0.186051	9.44699e-05	0.0032357
ENST00000660831.1|ENSG00000176659.11|OTTHUMG00000032880.3|OTTHUMT00000506367.1|LINC02910-203|LINC02910|2727|	0.186013	9.47313e-05	0.00323752
ENST00000455572.1|ENSG00000230046.1|OTTHUMG00000152106.1|OTTHUMT00000325221.1|BIRC6-AS1-201|BIRC6-AS1|697|	0.185604	9.76329e-05	0.00332937
ENST00000659408.1|ENSG00000287025.1|OTTHUMG00000195774.1|OTTHUMT00000528667.1|ENST00000659408|ENSG00000287025|2050|	0.18548	9.85278e-05	0.00335253
ENST00000669348.1|ENSG00000287499.1|OTTHUMG00000195350.1|OTTHUMT00000526523.1|ENST00000669348|ENSG00000287499|4088|	0.185374	9.9299e-05	0.0033714
ENST00000662020.1|ENSG00000287021.1|OTTHUMG00000195522.1|OTTHUMT00000527361.1|ENST00000662020|ENSG00000287021|3822|	0.18533	9.96184e-05	0.00337487
ENST00000585985.1|ENSG00000267172.1|OTTHUMG00000179872.1|OTTHUMT00000448734.1|ENST00000585985|ENSG00000267172|2593|	0.185271	0.000100055	0.00338229
ENST00000624542.1|ENSG00000279633.1|OTTHUMG00000172946.1|OTTHUMT00000421429.1|ENST00000624542|ENSG00000279633|1922|	0.185176	0.000100755	0.00339858
ENST00000692570.1|ENSG00000289194.1|-|-|ENST00000692570|ENSG00000289194|1054|	0.185102	0.000101306	0.00340975
ENST00000419578.1|ENSG00000224308.1|OTTHUMG00000012449.1|OTTHUMT00000034662.1|LINC01527-201|LINC01527|1997|	0.184677	0.000104515	0.00350767
ENST00000518739.1|ENSG00000253894.2|OTTHUMG00000164396.4|OTTHUMT00000378596.1|ENST00000518739|ENSG00000253894|3222|	0.184653	0.000104698	0.00350767
ENST00000666093.1|ENSG00000224893.7|OTTHUMG00000015852.12|OTTHUMT00000518737.2|LINC02840-210|LINC02840|4418|	0.184628	0.000104892	0.00350767
ENST00000561881.1|ENSG00000259946.1|OTTHUMG00000175887.1|OTTHUMT00000431238.1|ENST00000561881|ENSG00000259946|1810|	0.18451	0.000105798	0.00353039
ENST00000651726.1|ENSG00000286003.1|OTTHUMG00000192699.1|OTTHUMT00000498886.1|ENST00000651726|ENSG00000286003|1854|	0.184428	0.00010644	0.0035442
ENST00000669760.1|ENSG00000287215.1|OTTHUMG00000194747.1|OTTHUMT00000521488.1|ENST00000669760|ENSG00000287215|3627|	0.184228	0.000108015	0.00358848
ENST00000657432.1|ENSG00000286524.1|OTTHUMG00000195810.1|OTTHUMT00000528881.1|ENST00000657432|ENSG00000286524|1670|	0.1842	0.000108231	0.00358848
ENST00000607611.1|ENSG00000272033.1|OTTHUMG00000185366.1|OTTHUMT00000470335.1|ENST00000607611|ENSG00000272033|1893|	0.184096	0.000109064	0.00360841
ENST00000624376.1|ENSG00000279519.1|OTTHUMG00000175841.1|OTTHUMT00000431166.1|ENST00000624376|ENSG00000279519|2618|	0.183823	0.000111259	0.00367322
ENST00000624879.1|ENSG00000279623.1|OTTHUMG00000189129.1|OTTHUMT00000478897.1|ENST00000624879|ENSG00000279623|587|	0.183555	0.000113464	0.00373592
ENST00000652014.1|ENSG00000286021.3|OTTHUMG00000192687.4|OTTHUMT00000498846.2|LINC02822-201|LINC02822|1791|	0.183534	0.000113639	0.00373592
ENST00000624384.1|ENSG00000280202.1|OTTHUMG00000165347.2|OTTHUMT00000383537.2|ENST00000624384|ENSG00000280202|1697|	0.183494	0.00011397	0.00373888
ENST00000653453.1|ENSG00000288110.1|OTTHUMG00000195662.1|OTTHUMT00000528138.1|ENST00000653453|ENSG00000288110|2417|	0.183367	0.00011503	0.00376571
ENST00000419899.1|ENSG00000229325.1|OTTHUMG00000155905.1|OTTHUMT00000342226.1|ACAP2-IT1-201|ACAP2-IT1|690|	0.183017	0.000118009	0.00385512
ENST00000656173.1|ENSG00000233967.7|OTTHUMG00000015092.6|OTTHUMT00000522175.2|ENST00000656173|ENSG00000233967|4443|	0.182982	0.00011831	0.00385686
ENST00000663240.1|ENSG00000287241.1|OTTHUMG00000195050.1|OTTHUMT00000524037.1|ENST00000663240|ENSG00000287241|3170|	0.182951	0.000118578	0.0038575
ENST00000607014.1|ENSG00000272345.1|OTTHUMG00000185688.1|OTTHUMT00000470997.1|ENST00000607014|ENSG00000272345|887|	0.182744	0.000120382	0.00390801
ENST00000688027.1|ENSG00000289204.1|-|-|ENST00000688027|ENSG00000289204|2393|	0.182491	0.00012262	0.00397236
ENST00000569883.1|ENSG00000261019.1|OTTHUMG00000172765.1|OTTHUMT00000420384.1|ENST00000569883|ENSG00000261019|1368|	0.182348	0.000123897	0.00400064
ENST00000614876.1|ENSG00000273853.1|OTTHUMG00000187274.1|OTTHUMT00000474678.1|ENST00000614876|ENSG00000273853|543|	0.182336	0.000124007	0.00400064
ENST00000654329.1|ENSG00000287306.1|OTTHUMG00000195183.1|OTTHUMT00000525108.1|ENST00000654329|ENSG00000287306|2923|	0.182086	0.00012628	0.00406555
ENST00000691794.1|ENSG00000289163.1|-|-|ENST00000691794|ENSG00000289163|1728|	0.18194	0.000127629	0.00410048
ENST00000667650.1|ENSG00000287613.1|OTTHUMG00000195104.1|OTTHUMT00000524482.1|ENST00000667650|ENSG00000287613|2309|	0.181905	0.000127957	0.00410255
ENST00000547033.1|ENSG00000258178.1|OTTHUMG00000169845.1|OTTHUMT00000406211.1|ENST00000547033|ENSG00000258178|1258|	0.18175	0.000129407	0.00414049
ENST00000652817.1|ENSG00000287922.1|OTTHUMG00000195871.1|OTTHUMT00000529157.1|ENST00000652817|ENSG00000287922|2674|	0.181593	0.000130881	0.00417905
ENST00000620420.1|ENSG00000276542.1|OTTHUMG00000187517.1|OTTHUMT00000475203.1|ENST00000620420|ENSG00000276542|872|	0.181493	0.000131835	0.00419348
ENST00000618081.6|ENSG00000291090.1|-|OTTHUMT00000131970.3|CCDC144BP-208|CCDC144BP|8700|	0.181489	0.000131872	0.00419348
ENST00000562568.1|ENSG00000260600.1|OTTHUMG00000175403.1|OTTHUMT00000429879.1|ENST00000562568|ENSG00000260600|1995|	0.181427	0.000132475	0.00420405
ENST00000668117.1|ENSG00000286627.1|OTTHUMG00000195009.1|OTTHUMT00000523706.1|ENST00000668117|ENSG00000286627|3243|	0.18134	0.000133309	0.00421844
ENST00000624902.1|ENSG00000279190.1|OTTHUMG00000185836.1|OTTHUMT00000471465.1|ENST00000624902|ENSG00000279190|4547|	0.18132	0.000133506	0.00421844
ENST00000645861.1|ENSG00000285103.2|OTTHUMG00000192567.2|OTTHUMT00000496346.2|ENST00000645861|ENSG00000285103|8600|	0.181286	0.000133836	0.00421844
ENST00000641469.1|ENSG00000290814.1|-|OTTHUMT00000493510.1|ENST00000641469|ENSG00000290814|4627|	0.181267	0.000134013	0.00421844
ENST00000505326.6|ENSG00000250723.7|OTTHUMG00000160349.11|OTTHUMT00000360333.3|ENST00000505326|ENSG00000250723|2908|	0.181064	0.000136004	0.00427246
ENST00000669342.1|ENSG00000287749.1|OTTHUMG00000195619.1|OTTHUMT00000527870.1|ENST00000669342|ENSG00000287749|2680|	0.180928	0.000137342	0.00430579
ENST00000624727.1|ENSG00000279733.1|OTTHUMG00000167289.1|OTTHUMT00000394018.1|ENST00000624727|ENSG00000279733|2117|	0.180811	0.000138515	0.00432109
ENST00000622688.1|ENSG00000274964.1|OTTHUMG00000187236.2|OTTHUMT00000474620.2|ENST00000622688|ENSG00000274964|1357|	0.180808	0.000138547	0.00432109
ENST00000624724.1|ENSG00000279288.1|OTTHUMG00000173364.1|OTTHUMT00000422902.1|ENST00000624724|ENSG00000279288|2058|	0.180796	0.000138664	0.00432109
ENST00000623551.1|ENSG00000280304.1|OTTHUMG00000177231.1|OTTHUMT00000435939.1|ENST00000623551|ENSG00000280304|3497|	0.180501	0.00014165	0.0044053
ENST00000414227.1|ENSG00000243107.1|OTTHUMG00000155860.1|OTTHUMT00000342025.1|ENST00000414227|ENSG00000243107|1589|	0.180338	0.000143331	0.00444871
ENST00000648611.1|ENSG00000228061.7|OTTHUMG00000142920.3|OTTHUMT00000501294.1|ENST00000648611|ENSG00000228061|3945|	0.180172	0.000145053	0.00449318
ENST00000686186.1|ENSG00000288770.1|-|-|ENST00000686186|ENSG00000288770|540|	0.180084	0.000145985	0.00451307
ENST00000607148.1|ENSG00000272477.1|OTTHUMG00000185577.1|OTTHUMT00000470762.1|ENST00000607148|ENSG00000272477|956|	0.179937	0.000147533	0.00455187
ENST00000657254.1|ENSG00000287723.1|OTTHUMG00000194836.1|OTTHUMT00000522519.1|ENST00000657254|ENSG00000287723|2855|	0.179754	0.0001495	0.00460343
ENST00000665445.1|ENSG00000287026.1|OTTHUMG00000195703.1|OTTHUMT00000528322.1|ENST00000665445|ENSG00000287026|2504|	0.179663	0.000150474	0.00462426
ENST00000604982.2|ENSG00000271643.2|OTTHUMG00000185052.3|OTTHUMT00000498911.2|PDCD6IP-DT-201|PDCD6IP-DT|4524|	0.179628	0.000150854	0.00462679
ENST00000615828.1|ENSG00000274682.1|OTTHUMG00000187308.1|OTTHUMT00000474741.1|ENST00000615828|ENSG00000274682|501|	0.179509	0.000152158	0.0046576
ENST00000604845.1|ENSG00000270696.1|OTTHUMG00000185090.2|OTTHUMT00000469546.1|ENST00000604845|ENSG00000270696|1747|	0.17943	0.000153021	0.00467481
ENST00000602277.1|ENSG00000269902.1|OTTHUMG00000184078.1|OTTHUMT00000467991.1|ENST00000602277|ENSG00000269902|528|	0.17926	0.000154908	0.00471395
ENST00000641257.1|ENSG00000290744.1|-|OTTHUMT00000493362.1|ENST00000641257|ENSG00000290744|1534|	0.17926	0.000154909	0.00471395
ENST00000671017.1|ENSG00000287452.2|OTTHUMG00000196001.1|OTTHUMT00000528143.1|ENST00000671017|ENSG00000287452|3846|	0.179142	0.00015623	0.00474488
ENST00000605836.1|ENSG00000271553.1|OTTHUMG00000184226.1|OTTHUMT00000468356.1|ENST00000605836|ENSG00000271553|1114|	0.179024	0.000157555	0.00477579
ENST00000499642.1|ENSG00000246145.1|OTTHUMG00000164956.1|OTTHUMT00000381156.1|RRS1-DT-201|RRS1-DT|4366|	0.178927	0.000158654	0.00479598
ENST00000601500.1|ENSG00000259663.2|OTTHUMG00000171880.2|OTTHUMT00000465790.1|ISL1-DT-203|ISL1-DT|6762|	0.178911	0.000158838	0.00479598
ENST00000561507.1|ENSG00000261468.1|OTTHUMG00000175700.1|OTTHUMT00000430879.1|ENST00000561507|ENSG00000261468|1916|	0.178842	0.000159631	0.00480416
ENST00000661869.1|ENSG00000286675.1|OTTHUMG00000195612.1|OTTHUMT00000527783.1|ENST00000661869|ENSG00000286675|4630|	0.178816	0.000159924	0.00480416
ENST00000662587.1|ENSG00000260857.3|OTTHUMG00000183202.10|OTTHUMT00000509064.1|ENST00000662587|ENSG00000260857|1287|	0.178806	0.000160047	0.00480416
ENST00000441399.3|ENSG00000232160.7|OTTHUMG00000022425.4|OTTHUMT00000058317.2|RAP2C-AS1-202|RAP2C-AS1|3771|	0.17878	0.000160345	0.00480416
ENST00000623157.1|ENSG00000279778.1|OTTHUMG00000175865.1|OTTHUMT00000431198.1|ENST00000623157|ENSG00000279778|3087|	0.178734	0.000160868	0.00481058
ENST00000534653.1|ENSG00000255179.1|OTTHUMG00000165498.1|OTTHUMT00000384481.1|ENST00000534653|ENSG00000255179|529|	0.178654	0.000161797	0.00482905
ENST00000671135.1|ENSG00000288041.1|OTTHUMG00000195537.1|OTTHUMT00000527452.1|ENST00000671135|ENSG00000288041|2163|	0.1785	0.0001636	0.00487351
ENST00000606221.1|ENSG00000272046.1|OTTHUMG00000185728.1|OTTHUMT00000471083.1|ENST00000606221|ENSG00000272046|3599|	0.178413	0.000164616	0.00488641
ENST00000653163.1|ENSG00000272888.8|OTTHUMG00000149845.10|OTTHUMT00000505012.1|CHASERR-211|CHASERR|1704|	0.178408	0.000164679	0.00488641
ENST00000627173.1|ENSG00000281852.1|OTTHUMG00000189559.1|OTTHUMT00000479962.1|LINC00891-201|LINC00891|4113|	0.178383	0.000164975	0.00488641
ENST00000577199.1|ENSG00000266289.1|OTTHUMG00000178595.1|OTTHUMT00000442619.1|LINC02933-201|LINC02933|777|	0.178096	0.000168405	0.0049785
ENST00000622091.1|ENSG00000179577.4|OTTHUMG00000186799.1|OTTHUMT00000473803.1|ENST00000622091|ENSG00000179577|1989|	0.178061	0.000168823	0.00498141
ENST00000560339.2|ENSG00000259235.2|OTTHUMG00000172151.2|OTTHUMT00000417122.2|CTXN2-AS1-201|CTXN2-AS1|2694|	0.177996	0.000169614	0.00498795
ENST00000617603.1|ENSG00000277214.1|OTTHUMG00000187009.1|OTTHUMT00000474241.1|ENST00000617603|ENSG00000277214|606|	0.17799	0.000169687	0.00498795
ENST00000663846.2|ENSG00000230910.6|OTTHUMG00000014981.5|OTTHUMT00000041119.2|ADGRB3-DT-209|ADGRB3-DT|4345|	0.177817	0.000171793	0.00504034
ENST00000624003.1|ENSG00000279587.1|OTTHUMG00000175556.1|OTTHUMT00000430482.1|ENST00000624003|ENSG00000279587|1052|	0.177764	0.000172454	0.00505021
ENST00000618736.1|ENSG00000276564.1|OTTHUMG00000177380.1|OTTHUMT00000436630.1|ENST00000618736|ENSG00000276564|2403|	0.177438	0.000176514	0.00515939
ENST00000663862.1|ENSG00000233420.2|OTTHUMG00000153893.2|OTTHUMT00000523272.1|ENST00000663862|ENSG00000233420|3388|	0.177129	0.000180454	0.00526457
ENST00000418344.1|ENSG00000226053.1|OTTHUMG00000010681.1|OTTHUMT00000029438.1|LINC01776-201|LINC01776|2229|	0.177103	0.00018079	0.00526457
ENST00000657609.1|ENSG00000236778.8|OTTHUMG00000016944.9|OTTHUMT00000521063.1|INTS6-AS1-231|INTS6-AS1|2947|	0.176914	0.000183234	0.00532577
ENST00000648642.1|ENSG00000285704.1|OTTHUMG00000193160.1|OTTHUMT00000500325.1|ENST00000648642|ENSG00000285704|1161|	0.176874	0.000183758	0.00533105
ENST00000625142.1|ENSG00000280107.1|OTTHUMG00000175908.1|OTTHUMT00000431261.1|ENST00000625142|ENSG00000280107|1677|	0.176791	0.000184851	0.00535276
ENST00000642095.2|ENSG00000284612.2|OTTHUMG00000192347.1|OTTHUMT00000493637.1|ENST00000642095|ENSG00000284612|4213|	0.176686	0.000186244	0.00538307
ENST00000624987.1|ENSG00000280392.1|OTTHUMG00000176692.1|OTTHUMT00000433145.1|ENST00000624987|ENSG00000280392|3443|	0.176613	0.000187209	0.00540092
ENST00000567067.1|ENSG00000261600.1|OTTHUMG00000176044.2|OTTHUMT00000431417.2|ENST00000567067|ENSG00000261600|528|	0.176569	0.000187801	0.00540796
ENST00000616608.1|ENSG00000273771.1|OTTHUMG00000187028.1|OTTHUMT00000474280.1|ENST00000616608|ENSG00000273771|2797|	0.176507	0.000188628	0.00542175
ENST00000623308.1|ENSG00000279464.1|OTTHUMG00000176312.1|OTTHUMT00000431749.1|ENST00000623308|ENSG00000279464|2458|	0.176463	0.00018922	0.00542874
ENST00000562617.1|ENSG00000260217.1|OTTHUMG00000175847.2|OTTHUMT00000431173.2|ENST00000562617|ENSG00000260217|2109|	0.176296	0.000191477	0.00548176
ENST00000566282.1|ENSG00000259935.1|OTTHUMG00000172689.1|OTTHUMT00000419928.1|ENST00000566282|ENSG00000259935|540|	0.176274	0.000191773	0.00548176
ENST00000620519.1|ENSG00000275764.1|OTTHUMG00000187154.2|OTTHUMT00000474502.2|ENST00000620519|ENSG00000275764|1861|	0.175969	0.000195988	0.00558827
ENST00000412260.5|ENSG00000290659.1|-|OTTHUMT00000131967.23|ENST00000412260|ENSG00000290659|4329|	0.175952	0.000196218	0.00558827
ENST00000562669.1|ENSG00000260578.1|OTTHUMG00000176196.1|OTTHUMT00000431619.1|ENST00000562669|ENSG00000260578|3176|	0.175649	0.00020048	0.0056992
ENST00000658478.2|ENSG00000247828.10|OTTHUMG00000162704.21|OTTHUMT00000370018.3|TMEM161B-DT-226|TMEM161B-DT|3387|	0.175598	0.000201214	0.00570647
ENST00000608049.5|ENSG00000290877.1|-|OTTHUMT00000472417.1|ROCK1P1-203|ROCK1P1|2457|	0.17558	0.000201469	0.00570647
ENST00000685728.1|ENSG00000289591.2|-|-|ENST00000685728|ENSG00000289591|1640|	0.175458	0.000203222	0.00574564
ENST00000513560.7|ENSG00000248092.8|OTTHUMG00000162220.5|OTTHUMT00000367960.3|NNT-AS1-204|NNT-AS1|4803|	0.175388	0.000204231	0.00576368
ENST00000635484.1|ENSG00000282865.1|OTTHUMG00000191492.1|OTTHUMT00000488087.1|ENST00000635484|ENSG00000282865|2117|	0.175214	0.000206757	0.00582439
ENST00000667754.1|ENSG00000286293.1|OTTHUMG00000194992.1|OTTHUMT00000523562.1|ENST00000667754|ENSG00000286293|4140|	0.175171	0.000207392	0.00583172
ENST00000611946.1|ENSG00000276121.1|OTTHUMG00000186845.1|OTTHUMT00000473897.1|ENST00000611946|ENSG00000276121|526|	0.175038	0.000209358	0.0058764
ENST00000613291.1|ENSG00000274979.1|OTTHUMG00000187272.1|OTTHUMT00000474676.1|ENST00000613291|ENSG00000274979|5309|	0.174935	0.000210879	0.00590842
ENST00000663819.1|ENSG00000286749.1|OTTHUMG00000195214.1|OTTHUMT00000525365.1|ENST00000663819|ENSG00000286749|4152|	0.174876	0.000211761	0.00592245
ENST00000660339.1|ENSG00000236373.2|OTTHUMG00000018731.3|OTTHUMT00000519190.1|LINC02653-202|LINC02653|1495|	0.174796	0.000212972	0.00593497
ENST00000623972.1|ENSG00000279910.1|OTTHUMG00000175690.1|OTTHUMT00000430828.1|ENST00000623972|ENSG00000279910|4236|	0.174796	0.000212972	0.00593497
ENST00000653722.1|ENSG00000287899.1|OTTHUMG00000195818.1|OTTHUMT00000528903.1|ENST00000653722|ENSG00000287899|3200|	0.174733	0.000213918	0.00595067
ENST00000666957.1|ENSG00000286997.1|OTTHUMG00000180069.2|OTTHUMT00000449607.2|ENST00000666957|ENSG00000286997|4221|	0.174427	0.000218594	0.0060699
ENST00000624168.1|ENSG00000279341.1|OTTHUMG00000167255.1|OTTHUMT00000393885.1|ENST00000624168|ENSG00000279341|2567|	0.17422	0.000221809	0.00614817
ENST00000693113.1|ENSG00000289484.1|-|-|ENST00000693113|ENSG00000289484|2366|	0.174125	0.000223297	0.00617841
ENST00000624026.1|ENSG00000280348.1|OTTHUMG00000189131.1|OTTHUMT00000478901.1|ENST00000624026|ENSG00000280348|2130|	0.174067	0.000224217	0.00619285
ENST00000608748.1|ENSG00000272864.1|OTTHUMG00000186134.1|OTTHUMT00000472308.1|ENST00000608748|ENSG00000272864|565|	0.17401	0.000225112	0.00619891
ENST00000641004.1|ENSG00000290822.1|-|OTTHUMT00000493608.1|ENST00000641004|ENSG00000290822|1759|	0.174003	0.000225234	0.00619891
ENST00000689488.1|ENSG00000289468.1|-|-|ENST00000689488|ENSG00000289468|1074|	0.173958	0.000225946	0.00620754
ENST00000655887.1|ENSG00000287619.1|OTTHUMG00000194899.1|OTTHUMT00000523010.1|ENST00000655887|ENSG00000287619|1833|	0.173809	0.000228332	0.00624001
ENST00000654246.1|ENSG00000286855.1|OTTHUMG00000195051.1|OTTHUMT00000524038.1|ENST00000654246|ENSG00000286855|1483|	0.173804	0.000228403	0.00624001
ENST00000690578.1|ENSG00000289528.1|-|-|ENST00000690578|ENSG00000289528|1172|	0.173804	0.000228406	0.00624001
ENST00000608917.3|ENSG00000273129.3|OTTHUMG00000186484.1|OTTHUMT00000473226.1|PACERR-201|PACERR|2565|	0.173784	0.000228734	0.00624001
ENST00000611627.1|ENSG00000276417.1|OTTHUMG00000187118.1|OTTHUMT00000474448.1|ENST00000611627|ENSG00000276417|1414|	0.173708	0.000229954	0.00626231
ENST00000666097.1|ENSG00000287939.1|OTTHUMG00000195453.1|OTTHUMT00000526951.1|ENST00000666097|ENSG00000287939|1567|	0.17368	0.000230406	0.00626366
ENST00000662897.1|ENSG00000287731.1|OTTHUMG00000195566.1|OTTHUMT00000527562.1|ENST00000662897|ENSG00000287731|1906|	0.173587	0.00023192	0.00629382
ENST00000597755.2|ENSG00000236194.3|OTTHUMG00000132657.3|OTTHUMT00000255908.3|ENST00000597755|ENSG00000236194|1496|	0.173384	0.000235258	0.00637328
ENST00000661314.1|ENSG00000286875.1|OTTHUMG00000195521.1|OTTHUMT00000527359.1|ENST00000661314|ENSG00000286875|1460|	0.173131	0.000239485	0.0064765
ENST00000568817.1|ENSG00000260878.1|OTTHUMG00000176306.1|OTTHUMT00000431743.1|ENST00000568817|ENSG00000260878|668|	0.17309	0.000240165	0.00648362
ENST00000619055.1|ENSG00000277130.1|OTTHUMG00000187281.1|OTTHUMT00000474692.1|ENST00000619055|ENSG00000277130|682|	0.173005	0.000241606	0.00649705
ENST00000610058.2|ENSG00000273156.2|OTTHUMG00000186308.3|OTTHUMT00000472824.2|ENST00000610058|ENSG00000273156|1899|	0.172998	0.000241728	0.00649705
ENST00000557527.1|ENSG00000258804.1|OTTHUMG00000171357.1|OTTHUMT00000413105.1|LINC01148-201|LINC01148|1763|	0.172987	0.000241916	0.00649705
ENST00000688555.1|ENSG00000289361.1|-|-|ENST00000688555|ENSG00000289361|1549|	0.172903	0.000243354	0.00651389
ENST00000624506.1|ENSG00000279186.1|OTTHUMG00000189486.1|OTTHUMT00000479786.1|ENST00000624506|ENSG00000279186|2456|	0.172901	0.000243381	0.00651389
ENST00000445861.3|ENSG00000256040.2|OTTHUMG00000187226.1|OTTHUMT00000474605.1|PAPPA-AS1-201|PAPPA-AS1|2450|	0.17275	0.000245967	0.00657179
ENST00000561778.2|ENSG00000261754.2|OTTHUMG00000175768.2|OTTHUMT00000431047.2|ENST00000561778|ENSG00000261754|2757|	0.172689	0.000247019	0.00658436
ENST00000624660.1|ENSG00000279509.1|OTTHUMG00000177890.1|OTTHUMT00000439498.1|ENST00000624660|ENSG00000279509|743|	0.172666	0.000247433	0.00658436
ENST00000664733.1|ENSG00000257056.3|OTTHUMG00000170346.3|OTTHUMT00000522866.1|LINC02282-203|LINC02282|1812|	0.17265	0.000247707	0.00658436
ENST00000625474.1|ENSG00000281453.1|OTTHUMG00000189749.1|OTTHUMT00000481666.1|TGFB2-OT1-201|TGFB2-OT1|1371|	0.172593	0.000248697	0.00658841
ENST00000654891.1|ENSG00000286802.1|OTTHUMG00000195620.1|OTTHUMT00000527873.1|ENST00000654891|ENSG00000286802|3491|	0.172592	0.000248707	0.00658841
ENST00000440322.5|ENSG00000224490.5|OTTHUMG00000154082.1|OTTHUMT00000333766.1|TTC21B-AS1-201|TTC21B-AS1|2260|	0.172541	0.000249603	0.00659048
ENST00000624531.1|ENSG00000280296.1|OTTHUMG00000187322.1|OTTHUMT00000474760.1|ENST00000624531|ENSG00000280296|3099|	0.172539	0.000249633	0.00659048
ENST00000624647.1|ENSG00000280397.1|OTTHUMG00000175816.1|OTTHUMT00000431122.1|ENST00000624647|ENSG00000280397|3634|	0.172344	0.00025307	0.00666989
ENST00000476021.1|ENSG00000239519.1|OTTHUMG00000158987.1|OTTHUMT00000352814.1|CADM2-AS1-201|CADM2-AS1|2656|	0.172261	0.000254543	0.00669737
ENST00000499765.2|ENSG00000246308.4|OTTHUMG00000165807.2|OTTHUMT00000386304.2|ENST00000499765|ENSG00000246308|2428|	0.172141	0.000256694	0.00673845
ENST00000648644.1|ENSG00000285900.1|OTTHUMG00000192691.1|OTTHUMT00000498853.1|ENST00000648644|ENSG00000285900|2089|	0.172097	0.00025749	0.00673845
ENST00000670548.1|ENSG00000287881.1|OTTHUMG00000195846.1|OTTHUMT00000529020.1|ENST00000670548|ENSG00000287881|3223|	0.172094	0.000257537	0.00673845
ENST00000624256.1|ENSG00000279419.1|OTTHUMG00000173330.1|OTTHUMT00000422808.1|ENST00000624256|ENSG00000279419|2706|	0.172077	0.000257838	0.00673845
ENST00000646352.1|ENSG00000285041.1|OTTHUMG00000192364.1|OTTHUMT00000493738.1|ENST00000646352|ENSG00000285041|2636|	0.171991	0.000259399	0.00675472
ENST00000669840.1|ENSG00000226620.8|OTTHUMG00000017317.129|OTTHUMT00000521230.1|LINC00343-310|LINC00343|2367|	0.171955	0.000260059	0.00675472
ENST00000633881.1|ENSG00000279561.3|OTTHUMG00000191375.1|OTTHUMT00000487720.1|ENST00000633881|ENSG00000279561|4082|	0.17195	0.000260145	0.00675472
ENST00000503723.1|ENSG00000250472.1|OTTHUMG00000163154.1|OTTHUMT00000371858.1|TRIM36-IT1-201|TRIM36-IT1|881|	0.171947	0.000260198	0.00675472
ENST00000629535.3|ENSG00000281091.3|OTTHUMG00000189758.2|OTTHUMT00000481762.2|ENST00000629535|ENSG00000281091|2720|	0.171745	0.000263908	0.00683962
ENST00000606235.1|ENSG00000272425.1|OTTHUMG00000185499.1|OTTHUMT00000470610.1|ENST00000606235|ENSG00000272425|2172|	0.171707	0.000264609	0.00684637
ENST00000624147.1|ENSG00000279133.1|OTTHUMG00000179252.1|OTTHUMT00000445467.1|ENST00000624147|ENSG00000279133|3819|	0.171662	0.000265443	0.00685654
ENST00000601906.2|ENSG00000269570.2|OTTHUMG00000187460.1|OTTHUMT00000475023.1|ENST00000601906|ENSG00000269570|1524|	0.171544	0.000267629	0.00690154
ENST00000691431.1|ENSG00000289145.1|-|-|ENST00000691431|ENSG00000289145|2057|	0.171458	0.000269241	0.00693162
ENST00000656217.1|ENSG00000287231.1|OTTHUMG00000194911.1|OTTHUMT00000523073.1|ENST00000656217|ENSG00000287231|2004|	0.17114	0.000275275	0.00707524
ENST00000654804.1|ENSG00000253659.2|OTTHUMG00000164525.3|OTTHUMT00000527450.1|ENST00000654804|ENSG00000253659|1789|	0.171005	0.000277878	0.00713036
ENST00000590535.2|ENSG00000266968.2|OTTHUMG00000179043.2|OTTHUMT00000444541.2|ENST00000590535|ENSG00000266968|1785|	0.170751	0.000282832	0.00724553
ENST00000555985.6|ENSG00000259129.6|OTTHUMG00000170822.4|OTTHUMT00000410573.2|LINC00648-202|LINC00648|3173|	0.17071	0.000283655	0.00725465
ENST00000660040.1|ENSG00000225790.3|OTTHUMG00000157253.2|OTTHUMT00000528504.1|ENST00000660040|ENSG00000225790|3013|	0.170664	0.000284559	0.00726583
ENST00000641564.1|ENSG00000290411.1|-|OTTHUMT00000493360.1|ENST00000641564|ENSG00000290411|3163|	0.170513	0.000287568	0.00731868
ENST00000623107.1|ENSG00000280430.1|OTTHUMG00000167308.1|OTTHUMT00000394128.1|ENST00000623107|ENSG00000280430|614|	0.170512	0.00028757	0.00731868
ENST00000655396.1|ENSG00000249362.3|OTTHUMG00000162592.2|OTTHUMT00000516413.1|LINC02488-202|LINC02488|1557|	0.170453	0.000288762	0.00733701
ENST00000639316.2|ENSG00000263745.7|OTTHUMG00000178384.7|OTTHUMT00000492308.2|ENST00000639316|ENSG00000263745|4286|	0.170396	0.000289917	0.00735434
ENST00000504820.2|ENSG00000249494.6|OTTHUMG00000162961.2|OTTHUMT00000371175.2|DMXL1-DT-201|DMXL1-DT|4375|	0.170351	0.000290807	0.00735766
ENST00000623868.1|ENSG00000279885.1|OTTHUMG00000131573.3|OTTHUMT00000443621.1|ENST00000623868|ENSG00000279885|3174|	0.170342	0.000290994	0.00735766
ENST00000668831.1|ENSG00000287438.1|OTTHUMG00000193960.1|OTTHUMT00000507792.1|ENST00000668831|ENSG00000287438|1214|	0.170198	0.000293926	0.00741972
ENST00000641378.1|ENSG00000290765.1|-|OTTHUMT00000493176.1|ENST00000641378|ENSG00000290765|2919|	0.170167	0.000294561	0.0074237
ENST00000686493.1|ENSG00000288980.1|-|-|ENST00000686493|ENSG00000288980|1783|	0.1701	0.000295929	0.00743681
ENST00000624216.1|ENSG00000280099.1|OTTHUMG00000170856.1|OTTHUMT00000410684.1|ENST00000624216|ENSG00000280099|1717|	0.170089	0.000296161	0.00743681
ENST00000624796.1|ENSG00000279875.1|OTTHUMG00000172903.1|OTTHUMT00000421322.1|ENST00000624796|ENSG00000279875|1859|	0.170071	0.000296516	0.00743681
ENST00000452153.4|ENSG00000290544.1|-|OTTHUMT00000442329.2|ENST00000452153|ENSG00000290544|1150|	0.169911	0.000299844	0.00750487
ENST00000622965.1|ENSG00000279551.1|OTTHUMG00000169397.1|OTTHUMT00000403870.1|ENST00000622965|ENSG00000279551|1396|	0.169894	0.000300195	0.00750487
ENST00000641966.1|ENSG00000290829.1|-|OTTHUMT00000492978.1|ENST00000641966|ENSG00000290829|3141|	0.16976	0.000302988	0.00755622
ENST00000666312.1|ENSG00000248391.6|OTTHUMG00000161939.30|OTTHUMT00000507620.1|LINC02064-219|LINC02064|845|	0.169726	0.000303703	0.00755622
ENST00000660183.1|ENSG00000288057.1|OTTHUMG00000193768.1|OTTHUMT00000504544.1|ENST00000660183|ENSG00000288057|2858|	0.169726	0.000303706	0.00755622
ENST00000622038.1|ENSG00000274718.1|OTTHUMG00000187297.2|OTTHUMT00000474725.2|ENST00000622038|ENSG00000274718|2990|	0.169314	0.000312494	0.00776244
ENST00000689302.1|ENSG00000289309.1|-|-|ENST00000689302|ENSG00000289309|1534|	0.169236	0.000314186	0.00779201
ENST00000669594.1|ENSG00000229619.6|OTTHUMG00000186506.2|OTTHUMT00000528613.1|MBNL1-AS1-204|MBNL1-AS1|1934|	0.169157	0.000315906	0.00781042
ENST00000564741.1|ENSG00000261037.1|OTTHUMG00000173439.1|OTTHUMT00000423121.1|ENST00000564741|ENSG00000261037|3255|	0.169145	0.000316178	0.00781042
ENST00000565095.1|ENSG00000261167.1|OTTHUMG00000175784.1|OTTHUMT00000431071.1|ENST00000565095|ENSG00000261167|3473|	0.169133	0.000316435	0.00781042
ENST00000641173.1|ENSG00000290363.1|-|OTTHUMT00000493640.1|ENST00000641173|ENSG00000290363|1788|	0.169106	0.000317016	0.00781236
ENST00000685341.1|ENSG00000289507.1|-|-|ENST00000685341|ENSG00000289507|1319|	0.169007	0.00031919	0.00784231
ENST00000656053.1|ENSG00000267193.7|OTTHUMG00000179076.3|OTTHUMT00000522296.1|ENST00000656053|ENSG00000267193|2040|	0.169005	0.00031924	0.00784231
ENST00000621546.1|ENSG00000273989.1|OTTHUMG00000187168.2|OTTHUMT00000474520.2|ENST00000621546|ENSG00000273989|602|	0.168864	0.000322366	0.00789427
ENST00000655413.1|ENSG00000286330.1|OTTHUMG00000194834.1|OTTHUMT00000522491.1|ENST00000655413|ENSG00000286330|2709|	0.168864	0.00032237	0.00789427
ENST00000667394.1|ENSG00000287411.1|OTTHUMG00000194790.1|OTTHUMT00000522027.1|ENST00000667394|ENSG00000287411|1771|	0.168784	0.000324154	0.00792547
ENST00000624241.1|ENSG00000279139.1|OTTHUMG00000161536.1|OTTHUMT00000365226.1|ENST00000624241|ENSG00000279139|654|	0.168758	0.000324728	0.00792703
ENST00000652642.1|ENSG00000286211.1|OTTHUMG00000193131.1|OTTHUMT00000500252.1|ENST00000652642|ENSG00000286211|1050|	0.168657	0.000327016	0.00797037
ENST00000454040.5|ENSG00000227418.6|OTTHUMG00000154342.2|OTTHUMT00000334884.1|PCGEM1-201|PCGEM1|1590|	0.168613	0.000327998	0.00798111
ENST00000653744.1|ENSG00000287372.1|OTTHUMG00000195795.1|OTTHUMT00000528791.1|ENST00000653744|ENSG00000287372|2674|	0.168592	0.000328483	0.00798111
ENST00000623679.1|ENSG00000279518.1|OTTHUMG00000172341.1|OTTHUMT00000418011.1|ENST00000623679|ENSG00000279518|2186|	0.168546	0.000329516	0.00799371
ENST00000610061.1|ENSG00000272871.1|OTTHUMG00000185911.1|OTTHUMT00000471693.1|ENST00000610061|ENSG00000272871|1269|	0.168444	0.000331856	0.00803795
ENST00000691981.1|ENSG00000289369.1|-|-|ENST00000691981|ENSG00000289369|1768|	0.16828	0.000335617	0.00810678
ENST00000563184.1|ENSG00000260962.1|OTTHUMG00000176061.1|OTTHUMT00000431441.1|LINC00557-201|LINC00557|1279|	0.168257	0.000336147	0.00810678
ENST00000624116.1|ENSG00000279206.1|OTTHUMG00000173051.2|OTTHUMT00000478862.1|ENST00000624116|ENSG00000279206|600|	0.168252	0.000336262	0.00810678
ENST00000428732.1|ENSG00000234264.1|OTTHUMG00000009207.2|OTTHUMT00000474930.1|DEPDC1-AS1-201|DEPDC1-AS1|1247|	0.168061	0.000340713	0.00820137
ENST00000688245.2|ENSG00000288756.2|-|-|ENST00000688245|ENSG00000288756|1547|	0.167837	0.000346011	0.00831603
ENST00000413356.1|ENSG00000231175.1|OTTHUMG00000035556.1|OTTHUMT00000086305.1|LINC01720-201|LINC01720|2216|	0.167742	0.00034829	0.00835422
ENST00000569293.1|ENSG00000260142.1|OTTHUMG00000176276.1|OTTHUMT00000431712.1|ENST00000569293|ENSG00000260142|1028|	0.167726	0.000348674	0.00835422
ENST00000696259.1|ENSG00000289702.1|-|-|ENST00000696259|ENSG00000289702|2330|	0.167575	0.000352294	0.00842796
ENST00000619930.1|ENSG00000276593.1|OTTHUMG00000186858.1|OTTHUMT00000473920.1|ENST00000619930|ENSG00000276593|550|	0.167532	0.000353338	0.00843994
ENST00000666533.1|ENSG00000286934.1|OTTHUMG00000195592.1|OTTHUMT00000527657.1|ENST00000666533|ENSG00000286934|5786|	0.167503	0.000354054	0.00844407
ENST00000658911.1|ENSG00000287843.1|OTTHUMG00000194406.1|OTTHUMT00000515989.1|ENST00000658911|ENSG00000287843|879|	0.167332	0.000358236	0.00852623
ENST00000648749.1|ENSG00000233079.3|OTTHUMG00000008245.3|OTTHUMT00000500678.1|LINC01755-202|LINC01755|3146|	0.16731	0.000358783	0.00852623
ENST00000664029.1|ENSG00000286438.1|OTTHUMG00000195328.1|OTTHUMT00000526320.1|ENST00000664029|ENSG00000286438|2670|	0.167295	0.000359143	0.00852623
ENST00000624493.1|ENSG00000279696.1|OTTHUMG00000167487.1|OTTHUMT00000394788.1|ENST00000624493|ENSG00000279696|3152|	0.167272	0.000359717	0.00852684
ENST00000526448.1|ENSG00000255082.1|OTTHUMG00000167293.1|OTTHUMT00000394043.1|GRM5-AS1-201|GRM5-AS1|4821|	0.167235	0.000360626	0.00853537
ENST00000666058.1|ENSG00000286763.1|OTTHUMG00000195504.1|OTTHUMT00000527243.1|ENST00000666058|ENSG00000286763|2732|	0.167164	0.000362387	0.00856402
ENST00000521500.2|ENSG00000253207.3|OTTHUMG00000164895.3|OTTHUMT00000380837.2|ENST00000521500|ENSG00000253207|1584|	0.167098	0.000364038	0.00858996
ENST00000665783.1|ENSG00000225706.3|OTTHUMG00000019543.3|OTTHUMT00000522208.1|PTPRD-AS1-203|PTPRD-AS1|4188|	0.16704	0.000365475	0.00861082
ENST00000658526.1|ENSG00000286879.1|OTTHUMG00000195756.1|OTTHUMT00000528590.1|ENST00000658526|ENSG00000286879|2896|	0.166923	0.000368433	0.00866738
ENST00000664978.1|ENSG00000288557.1|OTTHUMG00000159196.72|OTTHUMT00000529031.1|ENST00000664978|ENSG00000288557|2919|	0.166879	0.000369537	0.0086802
ENST00000506330.1|ENSG00000248440.1|OTTHUMG00000162833.1|OTTHUMT00000370679.1|ENST00000506330|ENSG00000248440|566|	0.166708	0.0003739	0.00876945
ENST00000665703.1|ENSG00000286458.1|OTTHUMG00000194941.1|OTTHUMT00000523311.1|ENST00000665703|ENSG00000286458|2368|	0.166521	0.000378716	0.00886903
ENST00000546412.2|ENSG00000257986.3|OTTHUMG00000170315.4|OTTHUMT00000499598.2|LINC02306-201|LINC02306|2989|	0.166482	0.000379726	0.00887931
ENST00000438443.1|ENSG00000230968.1|OTTHUMG00000152841.1|OTTHUMT00000328224.1|ENST00000438443|ENSG00000230968|797|	0.166023	0.00039181	0.00914812
ENST00000653118.1|ENSG00000286579.1|OTTHUMG00000195436.1|OTTHUMT00000526885.1|ENST00000653118|ENSG00000286579|1253|	0.165802	0.000397761	0.00926441
ENST00000565493.2|ENSG00000260032.2|OTTHUMG00000175580.2|OTTHUMT00000430538.2|NORAD-201|NORAD|5401|	0.165794	0.000397983	0.00926441
ENST00000684874.1|ENSG00000289328.1|-|-|ENST00000684874|ENSG00000289328|1501|	0.165707	0.000400355	0.00929269
ENST00000641122.1|ENSG00000284656.1|OTTHUMG00000192348.1|OTTHUMT00000493643.1|ENST00000641122|ENSG00000284656|3727|	0.165706	0.000400392	0.00929269
ENST00000655441.1|ENSG00000286797.1|OTTHUMG00000195848.1|OTTHUMT00000529037.1|ENST00000655441|ENSG00000286797|3486|	0.165558	0.000404443	0.00937272
ENST00000624188.1|ENSG00000279050.1|OTTHUMG00000176879.1|OTTHUMT00000434200.1|PWAR1-201|PWAR1|2414|	0.165446	0.000407545	0.00943054
ENST00000588561.1|ENSG00000266900.1|OTTHUMG00000180171.1|OTTHUMT00000450103.1|ENST00000588561|ENSG00000266900|1603|	0.165387	0.000409191	0.00945456
ENST00000690469.1|ENSG00000288945.1|-|-|ENST00000690469|ENSG00000288945|1390|	0.165332	0.000410716	0.00947573
ENST00000624960.1|ENSG00000290724.1|-|OTTHUMT00000479362.1|XKRY-202|XKRY|1581|	0.165261	0.000412699	0.00950736
ENST00000614539.1|ENSG00000276115.1|OTTHUMG00000187242.2|OTTHUMT00000474630.2|ENST00000614539|ENSG00000276115|1796|	0.165036	0.000419064	0.00963972
ENST00000512678.1|ENSG00000251350.2|OTTHUMG00000160456.4|OTTHUMT00000360659.1|LINC02475-202|LINC02475|2622|	0.165014	0.00041971	0.00964031
ENST00000564401.1|ENSG00000259941.1|OTTHUMG00000176401.1|OTTHUMT00000431908.1|ENST00000564401|ENSG00000259941|2465|	0.16499	0.000420384	0.00964155
ENST00000511602.1|ENSG00000249842.1|OTTHUMG00000162579.1|OTTHUMT00000369662.1|ENST00000511602|ENSG00000249842|785|	0.164944	0.000421696	0.00965739
ENST00000604491.1|ENSG00000270562.1|OTTHUMG00000175716.2|OTTHUMT00000430895.2|FOXP1-DT-201|FOXP1-DT|2467|	0.164863	0.000424023	0.00969641
ENST00000499227.6|ENSG00000246366.7|OTTHUMG00000164429.3|OTTHUMT00000378742.2|LACTB2-AS1-201|LACTB2-AS1|3716|	0.16476	0.000427001	0.00973716
ENST00000658072.1|ENSG00000245275.9|OTTHUMG00000163570.7|OTTHUMT00000504979.1|SAP30L-AS1-207|SAP30L-AS1|4591|	0.164758	0.000427057	0.00973716
ENST00000608770.1|ENSG00000272732.1|OTTHUMG00000186148.1|OTTHUMT00000472322.1|ENST00000608770|ENSG00000272732|1655|	0.164684	0.000429215	0.00977202
ENST00000503695.4|ENSG00000250790.4|OTTHUMG00000167933.2|OTTHUMT00000397133.2|ENST00000503695|ENSG00000250790|3263|	0.164575	0.000432424	0.0098307
ENST00000623352.1|ENSG00000279390.1|OTTHUMG00000177446.1|OTTHUMT00000436942.1|ENST00000623352|ENSG00000279390|2191|	0.164464	0.00043569	0.00989047
ENST00000544842.1|ENSG00000256146.1|OTTHUMG00000168646.1|OTTHUMT00000400480.1|ENST00000544842|ENSG00000256146|3387|	0.164369	0.000438484	0.00993939
ENST00000657619.1|ENSG00000287081.1|OTTHUMG00000195162.1|OTTHUMT00000524887.1|ENST00000657619|ENSG00000287081|3912|	0.164331	0.000439629	0.00995085
ENST00000623268.1|ENSG00000280088.1|OTTHUMG00000170196.2|OTTHUMT00000407885.1|ENST00000623268|ENSG00000280088|1750|	0.164288	0.000440898	0.00996251
ENST00000670258.1|ENSG00000286559.1|OTTHUMG00000195019.1|OTTHUMT00000523776.1|ENST00000670258|ENSG00000286559|2805|	0.164271	0.000441426	0.00996251
ENST00000651480.1|ENSG00000250198.5|OTTHUMG00000161722.3|OTTHUMT00000499661.1|LINC02199-204|LINC02199|5612|	0.164205	0.000443409	0.00999276
ENST00000624993.1|ENSG00000279127.1|OTTHUMG00000175918.1|OTTHUMT00000431272.1|ENST00000624993|ENSG00000279127|2077|	0.164119	0.000445979	0.0100362
ENST00000662099.1|ENSG00000286545.1|OTTHUMG00000195700.1|OTTHUMT00000528302.1|ENST00000662099|ENSG00000286545|4045|	0.163778	0.000456408	0.010256
ENST00000616184.1|ENSG00000277806.1|OTTHUMG00000189065.1|OTTHUMT00000478597.1|ENST00000616184|ENSG00000277806|634|	0.163712	0.000458457	0.010286
ENST00000671279.1|ENSG00000287140.1|OTTHUMG00000195855.1|OTTHUMT00000529073.1|ENST00000671279|ENSG00000287140|4047|	0.163692	0.000459065	0.010286
ENST00000658522.1|ENSG00000288001.1|OTTHUMG00000194854.1|OTTHUMT00000522624.1|ENST00000658522|ENSG00000288001|2842|	0.163667	0.000459839	0.0102885
ENST00000611728.1|ENSG00000276390.1|OTTHUMG00000187397.1|OTTHUMT00000474892.1|ENST00000611728|ENSG00000276390|517|	0.163538	0.00046387	0.0103508
ENST00000568767.1|ENSG00000260695.1|OTTHUMG00000173313.1|OTTHUMT00000422728.1|ENST00000568767|ENSG00000260695|2673|	0.163515	0.0004646	0.0103508
ENST00000620503.1|ENSG00000273906.1|OTTHUMG00000188136.1|OTTHUMT00000476255.1|ENST00000620503|ENSG00000273906|2110|	0.163514	0.000464622	0.0103508
ENST00000562143.1|ENSG00000260093.1|OTTHUMG00000163777.1|OTTHUMT00000375424.1|MSRA-DT-201|MSRA-DT|3770|	0.163394	0.000468409	0.0104136
ENST00000619582.1|ENSG00000278532.1|OTTHUMG00000186670.1|OTTHUMT00000473585.1|ENST00000619582|ENSG00000278532|524|	0.163382	0.00046878	0.0104136
ENST00000659624.1|ENSG00000286908.1|OTTHUMG00000195063.1|OTTHUMT00000524190.1|ENST00000659624|ENSG00000286908|1813|	0.163174	0.000475423	0.0105419
ENST00000622993.1|ENSG00000279578.1|OTTHUMG00000187142.1|OTTHUMT00000474481.1|ENST00000622993|ENSG00000279578|3860|	0.163156	0.000476009	0.0105419
ENST00000671114.1|ENSG00000286410.1|OTTHUMG00000194332.1|OTTHUMT00000514520.1|ENST00000671114|ENSG00000286410|1674|	0.163138	0.000476589	0.0105419
ENST00000658845.1|ENSG00000286289.1|OTTHUMG00000194964.1|OTTHUMT00000523452.1|ENST00000658845|ENSG00000286289|3611|	0.163091	0.000478083	0.0105599
ENST00000594810.3|ENSG00000241158.7|OTTHUMG00000158723.8|OTTHUMT00000351902.4|ADAMTS9-AS1-207|ADAMTS9-AS1|4008|	0.163052	0.00047935	0.0105729
ENST00000498714.1|ENSG00000242094.1|OTTHUMG00000158796.1|OTTHUMT00000352242.1|FOXP1-IT1-201|FOXP1-IT1|3539|	0.162882	0.000484883	0.0106798
ENST00000658593.1|ENSG00000257126.6|OTTHUMG00000170343.2|OTTHUMT00000523848.1|FOXG1-AS1-205|FOXG1-AS1|2023|	0.162667	0.000491941	0.0108199
ENST00000612438.1|ENSG00000275226.1|OTTHUMG00000187339.1|OTTHUMT00000474784.1|LINC00547-201|LINC00547|3314|	0.162588	0.000494588	0.010854
ENST00000688655.1|ENSG00000289519.1|-|-|ENST00000688655|ENSG00000289519|1142|	0.162579	0.000494884	0.010854
ENST00000507387.1|ENSG00000250874.1|OTTHUMG00000162578.1|OTTHUMT00000369661.1|ENST00000507387|ENSG00000250874|1453|	0.162511	0.000497135	0.010888
ENST00000689277.1|ENSG00000281327.4|OTTHUMG00000189588.2|-|LINC01338-204|LINC01338|1628|	0.162372	0.000501828	0.0109753
ENST00000652892.1|ENSG00000286815.1|OTTHUMG00000194843.1|OTTHUMT00000522545.1|ENST00000652892|ENSG00000286815|811|	0.162306	0.000504057	0.0109943
ENST00000662806.1|ENSG00000230658.2|OTTHUMG00000152580.3|OTTHUMT00000326870.2|KLHL7-DT-202|KLHL7-DT|3578|	0.162304	0.000504112	0.0109943
ENST00000466454.1|ENSG00000291014.1|-|OTTHUMT00000344194.1|CLCA3P-203|CLCA3P|3412|	0.162266	0.000505418	0.0110074
ENST00000446520.2|ENSG00000224231.2|OTTHUMG00000153616.2|OTTHUMT00000331839.2|LINC01832-201|LINC01832|1832|	0.162228	0.000506702	0.0110199
ENST00000562127.1|ENSG00000260763.1|OTTHUMG00000175410.1|OTTHUMT00000429897.1|ENST00000562127|ENSG00000260763|3300|	0.162128	0.000510129	0.0110709
ENST00000587128.1|ENSG00000267058.1|OTTHUMG00000182208.1|OTTHUMT00000460022.1|ENST00000587128|ENSG00000267058|2193|	0.162118	0.000510471	0.0110709
ENST00000584509.2|ENSG00000264964.2|OTTHUMG00000179109.2|OTTHUMT00000444790.2|TWSG1-DT-201|TWSG1-DT|5142|	0.162064	0.000512313	0.0110953
ENST00000621705.1|ENSG00000276888.1|OTTHUMG00000170542.2|OTTHUMT00000409565.2|ENST00000621705|ENSG00000276888|2566|	0.1619	0.000517973	0.0112023
ENST00000624650.1|ENSG00000279394.1|OTTHUMG00000176725.1|OTTHUMT00000433310.1|ENST00000624650|ENSG00000279394|2260|	0.161805	0.000521315	0.011259
ENST00000663345.1|ENSG00000224318.6|OTTHUMG00000154872.4|OTTHUMT00000523128.2|CHL1-AS2-205|CHL1-AS2|2950|	0.161697	0.000525098	0.0113249
ENST00000668627.1|ENSG00000287227.1|OTTHUMG00000195077.1|OTTHUMT00000524287.1|ENST00000668627|ENSG00000287227|1715|	0.161485	0.000532609	0.011471
ENST00000664814.1|ENSG00000288025.1|OTTHUMG00000195574.1|OTTHUMT00000527577.1|ENST00000664814|ENSG00000288025|5159|	0.161349	0.000537476	0.0115598
ENST00000566968.1|ENSG00000260947.1|OTTHUMG00000175677.1|OTTHUMT00000430783.1|ENST00000566968|ENSG00000260947|3528|	0.161298	0.00053932	0.0115835
ENST00000568788.1|ENSG00000261030.1|OTTHUMG00000175492.1|OTTHUMT00000430270.1|ENST00000568788|ENSG00000261030|914|	0.161128	0.000545492	0.0116999
ENST00000664834.1|ENSG00000286965.1|OTTHUMG00000195573.1|OTTHUMT00000527576.1|ENST00000664834|ENSG00000286965|3858|	0.161084	0.000547083	0.0117178
ENST00000584957.2|ENSG00000265478.2|OTTHUMG00000186634.1|OTTHUMT00000473501.1|ENST00000584957|ENSG00000265478|985|	0.160929	0.000552806	0.0118241
ENST00000668291.1|ENSG00000288054.1|OTTHUMG00000195614.1|OTTHUMT00000527800.1|ENST00000668291|ENSG00000288054|3917|	0.160851	0.000555683	0.0118693
ENST00000446847.1|ENSG00000230063.1|OTTHUMG00000041460.1|OTTHUMT00000099334.1|ENST00000446847|ENSG00000230063|650|	0.160815	0.000557019	0.0118815
ENST00000651909.1|ENSG00000224897.9|OTTHUMG00000157170.13|OTTHUMT00000503918.1|POT1-AS1-210|POT1-AS1|3183|	0.160385	0.000573248	0.0122088
ENST00000602322.1|ENSG00000269939.1|OTTHUMG00000183952.1|OTTHUMT00000467572.1|PCF11-AS1-201|PCF11-AS1|1516|	0.160359	0.000574243	0.0122088
ENST00000603415.1|ENSG00000270277.1|OTTHUMG00000180305.1|OTTHUMT00000450681.1|ENST00000603415|ENSG00000270277|1798|	0.160347	0.000574717	0.0122088
ENST00000440698.1|ENSG00000231918.1|OTTHUMG00000144189.3|OTTHUMT00000291399.3|ENST00000440698|ENSG00000231918|3939|	0.159946	0.000590259	0.0125219
ENST00000641739.1|ENSG00000290479.1|-|OTTHUMT00000493091.1|ENST00000641739|ENSG00000290479|1652|	0.159846	0.000594199	0.0125883
ENST00000564771.1|ENSG00000260948.1|OTTHUMG00000176034.1|OTTHUMT00000431407.1|ENST00000564771|ENSG00000260948|2023|	0.159787	0.000596531	0.0126205
ENST00000624292.1|ENSG00000279004.1|OTTHUMG00000173212.1|OTTHUMT00000422479.1|ENST00000624292|ENSG00000279004|632|	0.15959	0.000604406	0.0127677
ENST00000623659.1|ENSG00000279527.1|OTTHUMG00000168624.1|OTTHUMT00000400415.1|ENST00000623659|ENSG00000279527|507|	0.159572	0.000605132	0.0127677
ENST00000687758.1|ENSG00000287776.2|OTTHUMG00000194341.1|-|ENST00000687758|ENSG00000287776|2787|	0.159527	0.000606948	0.0127887
ENST00000681309.1|ENSG00000288679.1|-|-|ENST00000681309|ENSG00000288679|4064|	0.159339	0.000614574	0.0129007
ENST00000655032.1|ENSG00000287029.1|OTTHUMG00000194859.1|OTTHUMT00000522668.1|ENST00000655032|ENSG00000287029|3915|	0.159336	0.000614706	0.0129007
ENST00000456049.1|ENSG00000224223.1|OTTHUMG00000156070.1|OTTHUMT00000342925.1|VSTM2A-OT1-201|VSTM2A-OT1|3031|	0.159335	0.000614753	0.0129007
ENST00000623872.1|ENSG00000280379.1|OTTHUMG00000167370.1|OTTHUMT00000394337.1|ENST00000623872|ENSG00000280379|773|	0.159303	0.000616047	0.0129104
ENST00000623718.1|ENSG00000279043.1|OTTHUMG00000187392.1|OTTHUMT00000474880.1|ENST00000623718|ENSG00000279043|5122|	0.159218	0.000619517	0.0129508
ENST00000561559.2|ENSG00000260101.2|OTTHUMG00000175896.1|OTTHUMT00000431248.1|AFTPH-DT-201|AFTPH-DT|1924|	0.159215	0.000619652	0.0129508
ENST00000415932.1|ENSG00000229876.1|OTTHUMG00000031831.1|OTTHUMT00000077916.1|CASC20-201|CASC20|1484|	0.159195	0.00062047	0.0129508
ENST00000670606.1|ENSG00000287474.1|OTTHUMG00000195740.1|OTTHUMT00000528541.1|ENST00000670606|ENSG00000287474|2843|	0.159121	0.000623525	0.0129911
ENST00000637719.1|ENSG00000290445.1|-|OTTHUMT00000047670.5|CCNYL2-202|CCNYL2|3311|	0.159108	0.000624072	0.0129911
ENST00000548029.1|ENSG00000257682.1|OTTHUMG00000169673.1|OTTHUMT00000405363.1|ENST00000548029|ENSG00000257682|729|	0.159036	0.000627052	0.0130356
ENST00000420186.2|ENSG00000231236.2|OTTHUMG00000078699.2|OTTHUMT00000171665.2|ENST00000420186|ENSG00000231236|2603|	0.159006	0.000628308	0.0130443
ENST00000500016.1|ENSG00000245466.1|OTTHUMG00000171332.1|OTTHUMT00000413015.1|TTC9-DT-201|TTC9-DT|2941|	0.158775	0.000638023	0.0132284
ENST00000696349.1|ENSG00000231040.3|OTTHUMG00000153712.1|-|LINC01911-214|LINC01911|2532|	0.158669	0.000642483	0.0133031
ENST00000661647.1|ENSG00000229855.9|OTTHUMG00000162941.12|OTTHUMT00000519531.1|ENST00000661647|ENSG00000229855|1385|	0.158473	0.000650887	0.0134592
ENST00000570186.1|ENSG00000260303.1|OTTHUMG00000176087.1|OTTHUMT00000431489.1|ENST00000570186|ENSG00000260303|4159|	0.158431	0.000652717	0.0134791
ENST00000623826.1|ENSG00000279844.1|OTTHUMG00000176253.1|OTTHUMT00000431681.1|ENST00000623826|ENSG00000279844|1364|	0.158342	0.000656542	0.0135401
ENST00000633154.1|ENSG00000282535.1|OTTHUMG00000180458.2|OTTHUMT00000451414.2|ENST00000633154|ENSG00000282535|1018|	0.158305	0.000658163	0.0135555
ENST00000693517.1|ENSG00000288881.1|-|-|ENST00000693517|ENSG00000288881|2306|	0.158218	0.00066197	0.0136112
ENST00000411553.3|ENSG00000228223.3|OTTHUMG00000014456.4|OTTHUMT00000040121.3|HCG11-201|HCG11|5696|	0.158203	0.000662618	0.0136112
ENST00000569927.2|ENSG00000260641.2|OTTHUMG00000175889.1|OTTHUMT00000431240.1|TSPAN5-DT-201|TSPAN5-DT|5657|	0.158053	0.000669194	0.0137282
ENST00000545709.1|ENSG00000250280.2|OTTHUMG00000168867.1|OTTHUMT00000401432.1|ENST00000545709|ENSG00000250280|3457|	0.157941	0.000674178	0.0138122
ENST00000695539.1|ENSG00000289687.1|-|-|ENST00000695539|ENSG00000289687|2406|	0.15784	0.0006787	0.0138866
ENST00000612725.1|ENSG00000278740.1|OTTHUMG00000186696.1|OTTHUMT00000473631.1|ENST00000612725|ENSG00000278740|619|	0.157793	0.000680782	0.0139108
ENST00000624772.1|ENSG00000279729.1|OTTHUMG00000177277.1|OTTHUMT00000436081.1|ENST00000624772|ENSG00000279729|1561|	0.15774	0.000683206	0.0139351
ENST00000623548.1|ENSG00000279636.2|OTTHUMG00000187383.1|OTTHUMT00000474864.1|LINC00216-201|LINC00216|1126|	0.157716	0.000684273	0.0139351
ENST00000624366.1|ENSG00000280269.1|OTTHUMG00000168116.1|OTTHUMT00000398259.1|ENST00000624366|ENSG00000280269|878|	0.157707	0.000684656	0.0139351
ENST00000569618.1|ENSG00000261696.1|OTTHUMG00000175506.1|OTTHUMT00000430309.1|ENST00000569618|ENSG00000261696|1459|	0.157637	0.000687826	0.0139813
ENST00000605892.2|ENSG00000272103.2|OTTHUMG00000185469.2|OTTHUMT00000470574.2|ENST00000605892|ENSG00000272103|2237|	0.157613	0.000688918	0.0139852
ENST00000652050.1|ENSG00000229643.2|OTTHUMG00000040955.2|OTTHUMT00000501654.1|LINC00280-202|LINC00280|2355|	0.157486	0.000694723	0.0140847
ENST00000673532.1|ENSG00000287243.2|OTTHUMG00000195122.2|OTTHUMT00000529533.1|THCAT155-203|THCAT155|5977|	0.157412	0.000698114	0.014135
ENST00000659981.1|ENSG00000287708.1|OTTHUMG00000194779.1|OTTHUMT00000521861.1|ENST00000659981|ENSG00000287708|4224|	0.157045	0.000715173	0.0144616
ENST00000654219.1|ENSG00000287172.1|OTTHUMG00000195586.1|OTTHUMT00000527612.1|ENST00000654219|ENSG00000287172|2438|	0.157008	0.000716944	0.0144786
ENST00000650086.1|ENSG00000285627.1|OTTHUMG00000193299.1|OTTHUMT00000500676.1|ENST00000650086|ENSG00000285627|3470|	0.156888	0.000722615	0.0145741
ENST00000688126.1|ENSG00000289443.1|-|-|ENST00000688126|ENSG00000289443|1889|	0.156809	0.000726351	0.0146305
ENST00000444796.2|ENSG00000230852.2|OTTHUMG00000015120.3|OTTHUMT00000041366.2|LINC02857-201|LINC02857|2300|	0.156646	0.000734198	0.0147694
ENST00000661396.2|ENSG00000237166.4|OTTHUMG00000154537.7|OTTHUMT00000335852.3|LINC01792-204|LINC01792|2846|	0.15662	0.000735442	0.0147754
ENST00000613623.1|ENSG00000275286.1|OTTHUMG00000187335.1|OTTHUMT00000474779.1|ENST00000613623|ENSG00000275286|543|	0.156578	0.000737452	0.0147966
ENST00000657329.1|ENSG00000227885.4|OTTHUMG00000014883.5|OTTHUMT00000527399.1|ENST00000657329|ENSG00000227885|3695|	0.156531	0.000739732	0.0148232
ENST00000655511.1|ENSG00000286823.1|OTTHUMG00000194432.1|OTTHUMT00000516193.1|ENST00000655511|ENSG00000286823|1258|	0.156478	0.000742333	0.0148253
ENST00000656007.1|ENSG00000232885.2|OTTHUMG00000017197.2|OTTHUMT00000515485.1|GPC5-AS2-202|GPC5-AS2|1123|	0.156474	0.000742493	0.0148253
ENST00000653384.1|ENSG00000253671.3|OTTHUMG00000163706.3|OTTHUMT00000527836.1|ENST00000653384|ENSG00000253671|3153|	0.15647	0.000742696	0.0148253
ENST00000625174.1|ENSG00000280022.1|OTTHUMG00000176047.1|OTTHUMT00000431420.1|ENST00000625174|ENSG00000280022|749|	0.15645	0.000743673	0.0148258
ENST00000617415.1|ENSG00000276517.1|OTTHUMG00000188158.1|OTTHUMT00000476392.1|ENST00000617415|ENSG00000276517|3004|	0.156302	0.000750919	0.0149443
ENST00000668379.1|ENSG00000287424.1|OTTHUMG00000195259.1|OTTHUMT00000525637.1|ENST00000668379|ENSG00000287424|1884|	0.156286	0.000751721	0.0149443
ENST00000462792.2|ENSG00000239572.3|OTTHUMG00000159002.5|OTTHUMT00000499593.2|ENST00000462792|ENSG00000239572|4256|	0.15627	0.000752499	0.0149443
ENST00000598952.1|ENSG00000269296.1|OTTHUMG00000182660.1|OTTHUMT00000462929.1|ENST00000598952|ENSG00000269296|3653|	0.155871	0.000772431	0.0153205
ENST00000690049.1|ENSG00000288780.1|-|-|ENST00000690049|ENSG00000288780|2048|	0.155804	0.000775806	0.0153679
ENST00000569267.1|ENSG00000260645.2|OTTHUMG00000175925.2|OTTHUMT00000431279.1|ENST00000569267|ENSG00000260645|2123|	0.155728	0.000779705	0.0154255
ENST00000624049.1|ENSG00000278971.1|OTTHUMG00000178786.1|OTTHUMT00000443341.1|ENST00000624049|ENSG00000278971|1576|	0.15565	0.000783653	0.0154839
ENST00000658976.1|ENSG00000287364.1|OTTHUMG00000195802.1|OTTHUMT00000528860.1|ENST00000658976|ENSG00000287364|5864|	0.155551	0.000788765	0.0155626
ENST00000623479.1|ENSG00000280406.1|OTTHUMG00000178471.1|OTTHUMT00000442121.1|ENST00000623479|ENSG00000280406|597|	0.155534	0.000789639	0.0155626
ENST00000664334.1|ENSG00000271850.2|OTTHUMG00000185756.2|OTTHUMT00000522061.1|LINC02343-202|LINC02343|2532|	0.155469	0.000793014	0.0155922
ENST00000653804.1|ENSG00000288019.1|OTTHUMG00000195470.1|OTTHUMT00000527085.1|ENST00000653804|ENSG00000288019|1834|	0.155466	0.000793148	0.0155922
ENST00000567102.1|ENSG00000260296.1|OTTHUMG00000176303.1|OTTHUMT00000431740.1|ENST00000567102|ENSG00000260296|1157|	0.155405	0.000796341	0.0156352
ENST00000527012.1|ENSG00000254691.1|OTTHUMG00000166652.2|OTTHUMT00000390985.2|ENST00000527012|ENSG00000254691|551|	0.155324	0.00080055	0.015698
ENST00000668244.1|ENSG00000249249.2|OTTHUMG00000155201.3|OTTHUMT00000525161.1|TICAM2-AS1-204|TICAM2-AS1|4176|	0.15518	0.000808121	0.0158265
ENST00000684924.1|ENSG00000288941.1|-|-|ENST00000684924|ENSG00000288941|2498|	0.155069	0.000813974	0.0159211
ENST00000685819.1|ENSG00000288918.1|-|-|ENST00000685819|ENSG00000288918|1482|	0.155	0.000817622	0.0159724
ENST00000422014.1|ENSG00000236666.1|OTTHUMG00000140316.1|OTTHUMT00000276920.1|POTEH-AS1-201|POTEH-AS1|2566|	0.15493	0.0008214	0.0160261
ENST00000439234.5|ENSG00000223770.5|OTTHUMG00000154779.1|OTTHUMT00000337033.1|CACNA2D1-AS1-201|CACNA2D1-AS1|2651|	0.154909	0.000822518	0.0160278
ENST00000668249.1|ENSG00000287352.1|OTTHUMG00000195404.1|OTTHUMT00000526781.1|ENST00000668249|ENSG00000287352|1177|	0.154818	0.000827392	0.0161026
ENST00000706486.1|ENSG00000291301.1|-|-|ENST00000706486|ENSG00000291301|5373|	0.154783	0.00082929	0.0161193
ENST00000668433.1|ENSG00000286592.2|OTTHUMG00000150934.5|OTTHUMT00000320594.2|LINC02885-202|LINC02885|2729|	0.154761	0.000830464	0.016122
ENST00000568270.1|ENSG00000260151.1|OTTHUMG00000176148.1|OTTHUMT00000431569.1|LINC02673-201|LINC02673|1395|	0.154738	0.000831738	0.0161266
ENST00000448407.1|ENSG00000232307.1|OTTHUMG00000041332.1|OTTHUMT00000099035.1|DAOA-AS1-201|DAOA-AS1|2482|	0.154658	0.000836036	0.0161767
ENST00000666710.1|ENSG00000287647.1|OTTHUMG00000195752.1|OTTHUMT00000528586.1|ENST00000666710|ENSG00000287647|2059|	0.154652	0.000836402	0.0161767
ENST00000688995.1|ENSG00000289405.1|-|-|ENST00000688995|ENSG00000289405|1891|	0.154611	0.000838632	0.0161997
ENST00000624253.1|ENSG00000279565.1|OTTHUMG00000175928.1|OTTHUMT00000431282.1|ENST00000624253|ENSG00000279565|3502|	0.154575	0.000840565	0.0162169
ENST00000562919.1|ENSG00000260526.1|OTTHUMG00000176315.1|OTTHUMT00000431753.1|AP1AR-DT-201|AP1AR-DT|2036|	0.154449	0.000847503	0.0163304
ENST00000664348.1|ENSG00000286995.2|OTTHUMG00000195047.1|OTTHUMT00000523956.1|ENST00000664348|ENSG00000286995|2971|	0.154383	0.00085115	0.0163533
ENST00000619851.1|ENSG00000274893.1|OTTHUMG00000188309.1|OTTHUMT00000476868.1|ENST00000619851|ENSG00000274893|2254|	0.154374	0.000851658	0.0163533
ENST00000662153.1|ENSG00000287488.1|OTTHUMG00000195226.1|OTTHUMT00000525449.1|ENST00000662153|ENSG00000287488|1141|	0.15437	0.000851843	0.0163533
ENST00000655624.1|ENSG00000251649.2|OTTHUMG00000161146.7|OTTHUMT00000363950.2|LINC02379-202|LINC02379|1822|	0.15432	0.000854644	0.0163868
ENST00000531742.1|ENSG00000254873.1|OTTHUMG00000166405.1|OTTHUMT00000389620.1|ENST00000531742|ENSG00000254873|2074|	0.154242	0.000859004	0.0164368
ENST00000606963.1|ENSG00000272010.1|OTTHUMG00000185471.1|OTTHUMT00000470579.1|ENST00000606963|ENSG00000272010|623|	0.154235	0.000859364	0.0164368
ENST00000623844.1|ENSG00000279479.1|OTTHUMG00000178469.1|OTTHUMT00000442106.1|ENST00000623844|ENSG00000279479|1929|	0.1542	0.000861324	0.0164538
ENST00000512300.1|ENSG00000248362.1|OTTHUMG00000163422.1|OTTHUMT00000373325.1|ENST00000512300|ENSG00000248362|793|	0.154181	0.000862371	0.0164538
ENST00000599320.2|ENSG00000269486.2|OTTHUMG00000182717.2|OTTHUMT00000463272.2|ERVK9-11-201|ERVK9-11|3336|	0.154104	0.000866687	0.0165159
ENST00000623510.1|ENSG00000279039.1|OTTHUMG00000175722.1|OTTHUMT00000430901.1|ENST00000623510|ENSG00000279039|2598|	0.153896	0.000878509	0.0166846
ENST00000589125.5|ENSG00000267013.6|OTTHUMG00000176191.4|OTTHUMT00000431614.1|LINC01929-201|LINC01929|3067|	0.153894	0.000878582	0.0166846
ENST00000500765.1|ENSG00000248019.3|OTTHUMG00000161035.2|OTTHUMT00000363504.1|FAM13A-AS1-201|FAM13A-AS1|3210|	0.153891	0.000878757	0.0166846
ENST00000585150.1|ENSG00000266456.1|OTTHUMG00000178258.1|OTTHUMT00000441200.1|ENST00000585150|ENSG00000266456|2106|	0.153844	0.00088144	0.0167151
ENST00000456389.1|ENSG00000231080.1|OTTHUMG00000009166.1|OTTHUMT00000025411.1|ENST00000456389|ENSG00000231080|861|	0.153797	0.000884175	0.0167466
ENST00000472120.1|ENSG00000239205.1|OTTHUMG00000158073.1|OTTHUMT00000350128.1|LINC02023-201|LINC02023|1948|	0.153655	0.000892308	0.01688
ENST00000687904.1|ENSG00000289192.1|-|-|ENST00000687904|ENSG00000289192|2822|	0.153602	0.000895376	0.0168908
ENST00000564593.1|ENSG00000261666.1|OTTHUMG00000176053.1|OTTHUMT00000431427.1|LINC00560-201|LINC00560|1599|	0.153596	0.000895718	0.0168908
ENST00000563631.1|ENSG00000261646.1|OTTHUMG00000176321.1|OTTHUMT00000431759.1|ENST00000563631|ENSG00000261646|2209|	0.153589	0.000896134	0.0168908
ENST00000687875.1|ENSG00000288921.1|-|-|ENST00000687875|ENSG00000288921|744|	0.153493	0.000901746	0.016976
ENST00000568179.1|ENSG00000266801.1|OTTHUMG00000178337.1|OTTHUMT00000441610.1|ENST00000568179|ENSG00000266801|641|	0.153441	0.0009048	0.0170129
ENST00000607490.1|ENSG00000271761.1|OTTHUMG00000185766.1|OTTHUMT00000471198.1|ENST00000607490|ENSG00000271761|540|	0.153302	0.000912953	0.0171454
ENST00000648788.1|ENSG00000285789.1|OTTHUMG00000192719.1|OTTHUMT00000498941.1|ENST00000648788|ENSG00000285789|1912|	0.153233	0.000917055	0.0172017
ENST00000570073.2|ENSG00000259810.2|OTTHUMG00000177769.2|OTTHUMT00000438894.2|ENST00000570073|ENSG00000259810|2792|	0.153131	0.000923121	0.0172946
ENST00000667756.1|ENSG00000231646.6|OTTHUMG00000155450.2|OTTHUMT00000528764.1|FSIP2-AS1-203|FSIP2-AS1|1539|	0.153087	0.000925751	0.0173101
ENST00000662246.1|ENSG00000249899.6|OTTHUMG00000162173.3|OTTHUMT00000524520.1|ITGA2-AS1-203|ITGA2-AS1|2162|	0.15308	0.000926177	0.0173101
ENST00000658044.1|ENSG00000287857.1|OTTHUMG00000195247.1|OTTHUMT00000525556.1|ENST00000658044|ENSG00000287857|2559|	0.153061	0.000927289	0.0173101
ENST00000655254.1|ENSG00000286943.1|OTTHUMG00000195363.1|OTTHUMT00000526567.1|ENST00000655254|ENSG00000286943|4477|	0.152906	0.000936635	0.0174636
ENST00000663710.1|ENSG00000235431.2|OTTHUMG00000151921.5|OTTHUMT00000513239.1|ENST00000663710|ENSG00000235431|1409|	0.15288	0.00093821	0.017472
ENST00000568095.5|ENSG00000260676.5|OTTHUMG00000176200.2|OTTHUMT00000431622.1|LINC01541-202|LINC01541|3105|	0.152817	0.000942017	0.017522
ENST00000623243.1|ENSG00000280228.1|OTTHUMG00000176146.1|OTTHUMT00000431567.1|ENST00000623243|ENSG00000280228|3868|	0.152731	0.000947269	0.0175986
ENST00000686897.1|ENSG00000289134.1|-|-|ENST00000686897|ENSG00000289134|1217|	0.152645	0.000952513	0.0176749
ENST00000655697.1|ENSG00000231969.4|OTTHUMG00000153745.4|OTTHUMT00000528680.1|MMADHC-DT-202|MMADHC-DT|4034|	0.152566	0.000957371	0.0177439
ENST00000602697.1|ENSG00000269983.1|OTTHUMG00000184032.1|OTTHUMT00000467833.1|ENST00000602697|ENSG00000269983|718|	0.152464	0.000963688	0.0178397
ENST00000663294.1|ENSG00000229956.11|OTTHUMG00000009733.12|OTTHUMT00000528317.1|ZRANB2-DT-241|ZRANB2-DT|1709|	0.152443	0.000965028	0.0178433
ENST00000554753.2|ENSG00000258814.2|OTTHUMG00000171368.2|OTTHUMT00000413188.2|LINC02329-201|LINC02329|1859|	0.152341	0.000971399	0.0179397
ENST00000617627.1|ENSG00000276308.1|OTTHUMG00000187123.1|OTTHUMT00000474456.1|ENST00000617627|ENSG00000276308|1749|	0.152259	0.000976554	0.0180135
ENST00000669006.1|ENSG00000248202.2|OTTHUMG00000162710.4|OTTHUMT00000521081.1|LINC02234-204|LINC02234|1594|	0.152216	0.000979227	0.0180414
ENST00000608159.1|ENSG00000273093.1|OTTHUMG00000186492.1|OTTHUMT00000473239.1|ENST00000608159|ENSG00000273093|533|	0.152107	0.000986163	0.0181441
ENST00000623342.1|ENSG00000279078.1|OTTHUMG00000189460.1|OTTHUMT00000479729.1|SND1-IT1-201|SND1-IT1|2481|	0.15209	0.000987185	0.0181441
ENST00000625093.1|ENSG00000278980.1|OTTHUMG00000167317.1|OTTHUMT00000394137.1|ENST00000625093|ENSG00000278980|753|	0.152073	0.00098832	0.0181441
ENST00000513955.1|ENSG00000251487.1|OTTHUMG00000161783.1|OTTHUMT00000366085.1|ENST00000513955|ENSG00000251487|898|	0.152055	0.000989467	0.0181441
ENST00000623774.1|ENSG00000278963.1|OTTHUMG00000177509.1|OTTHUMT00000437283.1|ENST00000623774|ENSG00000278963|2151|	0.152026	0.000991282	0.018156
ENST00000658010.1|ENSG00000286563.1|OTTHUMG00000194753.1|OTTHUMT00000521549.1|ENST00000658010|ENSG00000286563|1743|	0.151983	0.000994051	0.0181853
ENST00000433794.5|ENSG00000131007.9|OTTHUMG00000041950.3|OTTHUMT00000475186.1|TTTY9B-201|TTTY9B|1637|	0.151898	0.000999493	0.0182435
ENST00000661621.1|ENSG00000272800.3|OTTHUMG00000186271.4|OTTHUMT00000523347.1|ENST00000661621|ENSG00000272800|1592|	0.151886	0.00100026	0.0182435
ENST00000651076.1|ENSG00000286272.1|OTTHUMG00000193082.2|OTTHUMT00000500092.2|ENST00000651076|ENSG00000286272|1447|	0.151878	0.00100075	0.0182435
ENST00000495307.5|ENSG00000290720.1|-|OTTHUMT00000277133.1|ZNF542P-207|ZNF542P|3393|	0.151743	0.00100949	0.0183646
ENST00000614289.1|ENSG00000278254.4|OTTHUMG00000189027.1|OTTHUMT00000478445.1|ENST00000614289|ENSG00000278254|2218|	0.151739	0.00100976	0.0183646
ENST00000617117.1|ENSG00000278266.1|OTTHUMG00000168462.2|OTTHUMT00000399833.2|ENST00000617117|ENSG00000278266|2933|	0.151488	0.00102614	0.0186407
ENST00000563647.1|ENSG00000259969.1|OTTHUMG00000172945.1|OTTHUMT00000421428.1|ENST00000563647|ENSG00000259969|981|	0.151339	0.00103602	0.0187983
ENST00000606361.1|ENSG00000272037.1|OTTHUMG00000185512.1|OTTHUMT00000470631.1|ENST00000606361|ENSG00000272037|1430|	0.151251	0.00104184	0.0188819
ENST00000673087.1|ENSG00000288330.1|OTTHUMG00000195932.1|OTTHUMT00000529690.1|ENST00000673087|ENSG00000288330|1601|	0.151182	0.00104652	0.0189445
ENST00000673795.2|ENSG00000288582.2|OTTHUMG00000195942.2|OTTHUMT00000529874.1|ENST00000673795|ENSG00000288582|3541|	0.151091	0.00105261	0.0190327
ENST00000562796.1|ENSG00000260059.1|OTTHUMG00000176215.1|OTTHUMT00000431639.1|ENST00000562796|ENSG00000260059|2764|	0.150955	0.0010618	0.0191765
ENST00000635591.1|ENSG00000283122.1|OTTHUMG00000189750.2|OTTHUMT00000481687.2|HYMAI-201|HYMAI|3347|	0.150692	0.00107981	0.019476
ENST00000666835.1|ENSG00000288104.1|OTTHUMG00000195672.1|OTTHUMT00000528168.1|ENST00000666835|ENSG00000288104|2196|	0.150677	0.00108089	0.019476
ENST00000663947.1|ENSG00000286314.1|OTTHUMG00000195569.1|OTTHUMT00000527565.1|ENST00000663947|ENSG00000286314|3033|	0.150636	0.00108371	0.0194974
ENST00000659036.1|ENSG00000287960.1|OTTHUMG00000195281.1|OTTHUMT00000525797.1|ENST00000659036|ENSG00000287960|2713|	0.150623	0.00108458	0.0194974
ENST00000665144.1|ENSG00000287949.1|OTTHUMG00000195527.1|OTTHUMT00000527425.1|ENST00000665144|ENSG00000287949|2932|	0.150541	0.00109028	0.0195601
ENST00000656770.1|ENSG00000287302.1|OTTHUMG00000194291.1|OTTHUMT00000513972.1|ENST00000656770|ENSG00000287302|1220|	0.150528	0.0010912	0.0195601
ENST00000664027.1|ENSG00000256538.2|OTTHUMG00000169287.4|OTTHUMT00000403314.3|ENST00000664027|ENSG00000256538|2736|	0.150504	0.00109292	0.0195601
ENST00000674143.1|ENSG00000288536.1|OTTHUMG00000195947.1|OTTHUMT00000530077.1|ENST00000674143|ENSG00000288536|2624|	0.150501	0.0010931	0.0195601
ENST00000639259.2|ENSG00000279317.4|OTTHUMG00000154719.2|OTTHUMT00000492299.1|ENST00000639259|ENSG00000279317|3963|	0.150433	0.00109783	0.0196221
ENST00000663979.1|ENSG00000287460.1|OTTHUMG00000194762.1|OTTHUMT00000521725.1|ENST00000663979|ENSG00000287460|2735|	0.150391	0.00110079	0.0196524
ENST00000620598.1|ENSG00000278052.1|OTTHUMG00000186533.1|OTTHUMT00000473298.1|ENST00000620598|ENSG00000278052|500|	0.150301	0.00110717	0.0197436
ENST00000652126.1|ENSG00000258526.8|OTTHUMG00000170672.15|OTTHUMT00000502108.1|ENST00000652126|ENSG00000258526|3960|	0.150259	0.00111013	0.0197738
ENST00000651690.1|ENSG00000286121.1|OTTHUMG00000192882.1|OTTHUMT00000499463.1|ENST00000651690|ENSG00000286121|2524|	0.150208	0.00111377	0.0198159
ENST00000624769.1|ENSG00000279118.1|OTTHUMG00000173432.1|OTTHUMT00000423087.1|ENST00000624769|ENSG00000279118|2326|	0.150127	0.00111948	0.0198948
ENST00000442176.2|ENSG00000229108.4|OTTHUMG00000152388.2|OTTHUMT00000326053.1|LINC02587-201|LINC02587|2097|	0.150021	0.00112712	0.0200077
ENST00000505721.2|ENSG00000251011.6|OTTHUMG00000159722.2|OTTHUMT00000357036.2|TMEM108-AS1-202|TMEM108-AS1|3269|	0.149985	0.00112973	0.0200311
ENST00000566804.1|ENSG00000261734.1|OTTHUMG00000175701.1|OTTHUMT00000430880.1|ENST00000566804|ENSG00000261734|2314|	0.149451	0.00116879	0.0206802
ENST00000602749.1|ENSG00000270147.1|OTTHUMG00000183998.1|OTTHUMT00000467722.1|ENST00000602749|ENSG00000270147|560|	0.149444	0.0011693	0.0206802
ENST00000622996.1|ENSG00000279432.1|OTTHUMG00000185903.1|OTTHUMT00000471670.1|ENST00000622996|ENSG00000279432|3122|	0.14943	0.00117032	0.0206802
ENST00000668519.1|ENSG00000272622.2|OTTHUMG00000186320.2|OTTHUMT00000472878.2|ENST00000668519|ENSG00000272622|3296|	0.149305	0.00117965	0.0208214
ENST00000567834.1|ENSG00000260108.1|OTTHUMG00000176778.1|OTTHUMT00000433711.1|ENST00000567834|ENSG00000260108|2421|	0.149282	0.00118139	0.0208284
ENST00000664698.1|ENSG00000267064.2|OTTHUMG00000180159.2|OTTHUMT00000520771.1|UXT-AS1-204|UXT-AS1|3445|	0.149228	0.00118547	0.0208766
ENST00000637205.2|ENSG00000283415.2|OTTHUMG00000191628.2|OTTHUMT00000488916.2|ENST00000637205|ENSG00000283415|4823|	0.149194	0.00118801	0.0208977
ENST00000655945.1|ENSG00000229739.4|OTTHUMG00000196000.1|OTTHUMT00000528334.1|PDC-AS1-203|PDC-AS1|2156|	0.149107	0.00119457	0.0209893
ENST00000525716.2|ENSG00000255455.2|OTTHUMG00000165662.2|OTTHUMT00000448585.1|ENST00000525716|ENSG00000255455|3994|	0.149033	0.00120025	0.0210653
ENST00000563003.1|ENSG00000261502.4|OTTHUMG00000177973.3|OTTHUMT00000431637.1|ENST00000563003|ENSG00000261502|2571|	0.148985	0.00120385	0.0211048
ENST00000669239.1|ENSG00000287101.1|OTTHUMG00000195340.1|OTTHUMT00000526416.1|ENST00000669239|ENSG00000287101|1994|	0.148937	0.00120757	0.0211309
ENST00000647581.1|ENSG00000285739.1|OTTHUMG00000192949.2|OTTHUMT00000499669.2|ENST00000647581|ENSG00000285739|1510|	0.14893	0.00120806	0.0211309
ENST00000416218.1|ENSG00000224832.2|OTTHUMG00000078332.2|OTTHUMT00000171146.2|LINC01689-201|LINC01689|2007|	0.148851	0.00121417	0.0212139
ENST00000606629.1|ENSG00000272129.1|OTTHUMG00000185792.1|OTTHUMT00000471302.1|ENST00000606629|ENSG00000272129|1436|	0.148806	0.0012176	0.0212499
ENST00000623092.1|ENSG00000280255.1|OTTHUMG00000172768.2|OTTHUMT00000420389.2|ENST00000623092|ENSG00000280255|2671|	0.148737	0.00122296	0.0213196
ENST00000511346.1|ENSG00000250957.1|OTTHUMG00000160740.1|OTTHUMT00000362074.1|ENST00000511346|ENSG00000250957|1144|	0.148715	0.00122464	0.0213249
ENST00000669879.1|ENSG00000287327.1|OTTHUMG00000193940.1|OTTHUMT00000507389.1|ENST00000669879|ENSG00000287327|500|	0.148597	0.00123385	0.021444
ENST00000699483.1|ENSG00000236915.3|OTTHUMG00000175864.1|-|CLCA4-AS1-204|CLCA4-AS1|3668|	0.148592	0.00123424	0.021444
ENST00000657567.1|ENSG00000286474.1|OTTHUMG00000194845.1|OTTHUMT00000522555.1|ENST00000657567|ENSG00000286474|1560|	0.148528	0.00123927	0.0214862
ENST00000624746.1|ENSG00000280048.1|OTTHUMG00000172931.1|OTTHUMT00000421370.1|ENST00000624746|ENSG00000280048|3424|	0.148515	0.00124027	0.0214862
ENST00000670789.1|ENSG00000248898.4|OTTHUMG00000195983.1|OTTHUMT00000527222.1|PELO-AS1-202|PELO-AS1|2727|	0.148498	0.00124164	0.0214862
ENST00000666856.1|ENSG00000286536.1|OTTHUMG00000194657.1|OTTHUMT00000520403.1|ENST00000666856|ENSG00000286536|2813|	0.148491	0.00124219	0.0214862
ENST00000667191.1|ENSG00000257261.7|OTTHUMG00000169473.8|OTTHUMT00000474947.2|SLC38A4-AS1-209|SLC38A4-AS1|2256|	0.14842	0.00124774	0.0215581
ENST00000562632.1|ENSG00000260761.1|OTTHUMG00000161957.2|OTTHUMT00000366517.2|ENST00000562632|ENSG00000260761|1513|	0.148301	0.00125719	0.0216974
ENST00000606229.1|ENSG00000272054.1|OTTHUMG00000185598.1|OTTHUMT00000470809.1|ENST00000606229|ENSG00000272054|3803|	0.148138	0.00127023	0.0218887
ENST00000637582.3|ENSG00000283462.3|OTTHUMG00000191622.3|OTTHUMT00000488870.2|ENST00000637582|ENSG00000283462|2065|	0.148127	0.00127109	0.0218887
ENST00000607072.1|ENSG00000272542.1|OTTHUMG00000185768.1|OTTHUMT00000471205.1|ENST00000607072|ENSG00000272542|977|	0.148026	0.00127921	0.0220041
ENST00000620563.1|ENSG00000273584.1|OTTHUMG00000186669.1|OTTHUMT00000473584.1|ENST00000620563|ENSG00000273584|552|	0.14797	0.00128377	0.022047
ENST00000583493.1|ENSG00000263424.1|OTTHUMG00000178537.1|OTTHUMT00000442414.1|ENST00000583493|ENSG00000263424|3289|	0.147961	0.00128454	0.022047
ENST00000505668.1|ENSG00000251023.1|OTTHUMG00000162817.1|OTTHUMT00000370529.1|ENST00000505668|ENSG00000251023|3157|	0.147885	0.00129067	0.0221278
ENST00000664890.1|ENSG00000287920.1|OTTHUMG00000195376.1|OTTHUMT00000526681.1|ENST00000664890|ENSG00000287920|4243|	0.14784	0.00129433	0.0221603
ENST00000623854.1|ENSG00000280276.1|OTTHUMG00000185594.1|OTTHUMT00000470803.1|ENST00000623854|ENSG00000280276|1947|	0.147827	0.00129541	0.0221603
ENST00000648024.1|ENSG00000285830.1|OTTHUMG00000192887.1|OTTHUMT00000499480.1|ENST00000648024|ENSG00000285830|3154|	0.147796	0.00129793	0.0221788
ENST00000623740.1|ENSG00000280395.1|OTTHUMG00000189186.1|OTTHUMT00000479008.1|ENST00000623740|ENSG00000280395|3693|	0.147766	0.00130046	0.0221977
ENST00000623938.1|ENSG00000279221.1|OTTHUMG00000178691.1|OTTHUMT00000442977.1|ENST00000623938|ENSG00000279221|3577|	0.147698	0.00130601	0.0222186
ENST00000651075.1|ENSG00000286259.1|OTTHUMG00000192876.1|OTTHUMT00000499451.1|ENST00000651075|ENSG00000286259|2828|	0.14769	0.0013067	0.0222186
ENST00000562834.1|ENSG00000261116.1|OTTHUMG00000175921.1|OTTHUMT00000431275.1|ENST00000562834|ENSG00000261116|1933|	0.147678	0.00130763	0.0222186
ENST00000499418.2|ENSG00000245149.6|OTTHUMG00000165073.3|OTTHUMT00000381699.1|RNF139-DT-201|RNF139-DT|5654|	0.147675	0.00130795	0.0222186
ENST00000594472.1|ENSG00000229692.3|OTTHUMG00000153569.3|OTTHUMT00000462047.1|SOS1-IT1-202|SOS1-IT1|1191|	0.147664	0.00130883	0.0222186
ENST00000623208.1|ENSG00000279786.1|OTTHUMG00000164255.1|OTTHUMT00000377957.1|ENST00000623208|ENSG00000279786|1816|	0.147634	0.00131129	0.0222361
ENST00000651678.1|ENSG00000286201.1|OTTHUMG00000193438.1|OTTHUMT00000501678.1|ENST00000651678|ENSG00000286201|6653|	0.147591	0.00131485	0.0222489
ENST00000634803.1|ENSG00000283117.1|OTTHUMG00000191550.2|OTTHUMT00000488409.2|MGC4859-201|MGC4859|3118|	0.147587	0.00131516	0.0222489
ENST00000624442.1|ENSG00000280356.1|OTTHUMG00000189274.1|OTTHUMT00000479259.1|ENST00000624442|ENSG00000280356|10684|	0.147567	0.00131686	0.0222489
ENST00000609701.1|ENSG00000273284.1|OTTHUMG00000186223.1|OTTHUMT00000472441.1|ENST00000609701|ENSG00000273284|1003|	0.147556	0.00131776	0.0222489
ENST00000661895.1|ENSG00000287336.1|OTTHUMG00000195821.1|OTTHUMT00000528910.1|ENST00000661895|ENSG00000287336|2299|	0.147406	0.00133032	0.0224365
ENST00000541353.2|ENSG00000290896.1|-|OTTHUMT00000400800.2|ENST00000541353|ENSG00000290896|2751|	0.147322	0.00133733	0.0225303
ENST00000440763.6|ENSG00000253500.6|OTTHUMG00000163764.3|OTTHUMT00000375297.2|ENST00000440763|ENSG00000253500|1860|	0.147259	0.00134264	0.0225953
ENST00000692287.1|ENSG00000289265.1|-|-|ENST00000692287|ENSG00000289265|1668|	0.146999	0.00136478	0.022943
ENST00000662787.1|ENSG00000286861.1|OTTHUMG00000194955.1|OTTHUMT00000523412.1|ENST00000662787|ENSG00000286861|3125|	0.146959	0.00136821	0.0229759
ENST00000689827.1|ENSG00000289042.1|-|-|ENST00000689827|ENSG00000289042|1049|	0.146891	0.00137406	0.0230492
ENST00000623493.1|ENSG00000279059.1|OTTHUMG00000177839.1|OTTHUMT00000439184.1|ENST00000623493|ENSG00000279059|1667|	0.146873	0.00137563	0.0230507
ENST00000655603.1|ENSG00000257711.2|OTTHUMG00000170061.4|OTTHUMT00000526799.1|ENST00000655603|ENSG00000257711|4079|	0.146741	0.00138708	0.0232176
ENST00000452057.1|ENSG00000229127.2|OTTHUMG00000154698.2|OTTHUMT00000336642.1|KANSL1L-AS1-201|KANSL1L-AS1|2199|	0.146689	0.00139165	0.0232468
ENST00000660034.1|ENSG00000287139.1|OTTHUMG00000194648.1|OTTHUMT00000520288.1|ENST00000660034|ENSG00000287139|1811|	0.146687	0.00139182	0.0232468
ENST00000608826.1|ENSG00000272631.1|OTTHUMG00000186453.1|OTTHUMT00000473174.1|ENST00000608826|ENSG00000272631|6545|	0.146655	0.00139463	0.0232688
ENST00000655512.1|ENSG00000286891.1|OTTHUMG00000195387.1|OTTHUMT00000526728.1|ENST00000655512|ENSG00000286891|4027|	0.146567	0.00140232	0.023372
ENST00000661964.1|ENSG00000287059.1|OTTHUMG00000195806.1|OTTHUMT00000528870.1|ENST00000661964|ENSG00000287059|3351|	0.1465	0.00140824	0.0234455
ENST00000648967.1|ENSG00000285582.1|OTTHUMG00000192936.1|OTTHUMT00000499636.1|ENST00000648967|ENSG00000285582|6449|	0.146425	0.0014149	0.0235312
ENST00000659445.1|ENSG00000231427.6|OTTHUMG00000156067.12|OTTHUMT00000524571.1|LINC01445-205|LINC01445|6099|	0.146365	0.0014202	0.0235938
ENST00000661188.1|ENSG00000286846.1|OTTHUMG00000194705.1|OTTHUMT00000521032.1|ENST00000661188|ENSG00000286846|3714|	0.146348	0.00142173	0.0235938
ENST00000587320.1|ENSG00000267325.2|OTTHUMG00000179871.4|OTTHUMT00000448732.1|LINC01415-201|LINC01415|4071|	0.146332	0.00142321	0.0235938
ENST00000651702.2|ENSG00000272870.4|OTTHUMG00000186433.6|OTTHUMT00000499212.2|SAP30-DT-205|SAP30-DT|1489|	0.146263	0.0014293	0.0236694
ENST00000520155.1|ENSG00000254123.2|OTTHUMG00000164603.2|OTTHUMT00000379372.1|LINC02839-201|LINC02839|823|	0.146207	0.00143439	0.0237284
ENST00000612282.1|ENSG00000277245.1|OTTHUMG00000186901.1|OTTHUMT00000473983.1|ENST00000612282|ENSG00000277245|578|	0.146033	0.00145009	0.0239442
ENST00000569932.1|ENSG00000260743.1|OTTHUMG00000175849.1|OTTHUMT00000431175.1|ENST00000569932|ENSG00000260743|1566|	0.146028	0.00145051	0.0239442
ENST00000667357.1|ENSG00000286332.1|OTTHUMG00000195033.1|OTTHUMT00000523867.1|ENST00000667357|ENSG00000286332|3138|	0.145908	0.00146148	0.0240997
ENST00000648283.1|ENSG00000285530.1|OTTHUMG00000192916.1|OTTHUMT00000499580.1|ENST00000648283|ENSG00000285530|3788|	0.145812	0.00147025	0.0242186
ENST00000500695.2|ENSG00000247363.3|OTTHUMG00000169264.1|OTTHUMT00000403192.1|NUP107-DT-202|NUP107-DT|1733|	0.145741	0.0014768	0.0243008
ENST00000648470.1|ENSG00000285562.1|OTTHUMG00000193317.1|OTTHUMT00000500701.1|ENST00000648470|ENSG00000285562|2715|	0.145668	0.00148361	0.0243634
ENST00000589795.1|ENSG00000267199.1|OTTHUMG00000180776.1|OTTHUMT00000452981.1|ENST00000589795|ENSG00000267199|4910|	0.14566	0.00148433	0.0243634
ENST00000670702.1|ENSG00000286328.1|OTTHUMG00000194867.1|OTTHUMT00000522723.1|ENST00000670702|ENSG00000286328|1257|	0.145649	0.0014853	0.0243634
ENST00000687073.1|ENSG00000288897.1|-|-|ENST00000687073|ENSG00000288897|1120|	0.145616	0.00148836	0.0243878
ENST00000652376.1|ENSG00000286226.1|OTTHUMG00000193055.2|OTTHUMT00000500024.2|ENST00000652376|ENSG00000286226|919|	0.145537	0.00149578	0.0244835
ENST00000654305.1|ENSG00000234244.2|OTTHUMG00000017769.3|OTTHUMT00000516322.1|ENST00000654305|ENSG00000234244|874|	0.145491	0.00150007	0.0245279
ENST00000660095.1|ENSG00000286649.1|OTTHUMG00000194922.1|OTTHUMT00000523149.1|ENST00000660095|ENSG00000286649|2218|	0.145411	0.00150761	0.0246254
ENST00000430931.1|ENSG00000229495.1|OTTHUMG00000015069.1|OTTHUMT00000041295.1|ENST00000430931|ENSG00000229495|2632|	0.145354	0.00151296	0.0246708
ENST00000468186.5|ENSG00000206573.11|OTTHUMG00000164357.11|OTTHUMT00000378422.1|THUMPD3-AS1-202|THUMPD3-AS1|3253|	0.145348	0.00151356	0.0246708
ENST00000649875.1|ENSG00000285963.1|OTTHUMG00000192661.1|OTTHUMT00000498755.1|ENST00000649875|ENSG00000285963|1959|	0.145196	0.00152792	0.0248787
ENST00000641684.1|ENSG00000290754.1|-|OTTHUMT00000493515.1|ENST00000641684|ENSG00000290754|4384|	0.145168	0.00153065	0.024897
ENST00000656175.1|ENSG00000238207.2|OTTHUMG00000141319.2|OTTHUMT00000528547.1|ENST00000656175|ENSG00000238207|4021|	0.145039	0.00154293	0.0250706
ENST00000668454.1|ENSG00000287862.1|OTTHUMG00000195510.1|OTTHUMT00000527266.1|ENST00000668454|ENSG00000287862|1977|	0.144953	0.00155124	0.0251794
ENST00000624321.1|ENSG00000279427.1|OTTHUMG00000177924.1|OTTHUMT00000439764.1|ENST00000624321|ENSG00000279427|703|	0.144915	0.00155497	0.0251924
ENST00000658965.1|ENSG00000287944.1|OTTHUMG00000194506.1|OTTHUMT00000517666.1|ENST00000658965|ENSG00000287944|1635|	0.144911	0.00155529	0.0251924
ENST00000664489.1|ENSG00000228215.3|OTTHUMG00000041131.3|OTTHUMT00000526894.1|LINC02770-202|LINC02770|1531|	0.14489	0.00155738	0.0252001
ENST00000624300.1|ENSG00000279165.1|OTTHUMG00000176220.1|OTTHUMT00000431645.1|ENST00000624300|ENSG00000279165|1904|	0.144751	0.00157092	0.0253927
ENST00000640078.1|ENSG00000283839.3|OTTHUMG00000191989.1|OTTHUMT00000491861.1|ENST00000640078|ENSG00000283839|3465|	0.144693	0.00157658	0.0254577
ENST00000564852.1|ENSG00000261555.1|OTTHUMG00000177267.1|OTTHUMT00000436068.1|ENST00000564852|ENSG00000261555|1655|	0.144655	0.0015803	0.0254914
ENST00000561915.1|ENSG00000260171.1|OTTHUMG00000176286.1|OTTHUMT00000431722.1|ENST00000561915|ENSG00000260171|1105|	0.144602	0.00158552	0.025549
ENST00000620188.1|ENSG00000276687.1|OTTHUMG00000175868.2|OTTHUMT00000431203.2|ENST00000620188|ENSG00000276687|1965|	0.144547	0.00159092	0.0256096
ENST00000673983.1|ENSG00000288555.1|OTTHUMG00000195948.1|OTTHUMT00000530078.1|ENST00000673983|ENSG00000288555|2694|	0.144274	0.00161814	0.0260207
ENST00000690489.1|ENSG00000289264.1|-|-|ENST00000690489|ENSG00000289264|1325|	0.144226	0.00162299	0.0260614
ENST00000424690.1|ENSG00000226779.1|OTTHUMG00000157131.1|OTTHUMT00000347547.1|NAALADL2-AS2-201|NAALADL2-AS2|1038|	0.144192	0.00162638	0.0260614
ENST00000607783.1|ENSG00000271976.1|OTTHUMG00000185633.1|OTTHUMT00000470889.1|ENST00000607783|ENSG00000271976|2583|	0.144189	0.00162669	0.0260614
ENST00000419784.1|ENSG00000236485.1|OTTHUMG00000156217.1|OTTHUMT00000343538.1|LINC01945-201|LINC01945|840|	0.144183	0.00162737	0.0260614
ENST00000623708.1|ENSG00000279795.1|OTTHUMG00000176516.1|OTTHUMT00000432376.1|ENST00000623708|ENSG00000279795|983|	0.144132	0.00163245	0.0261159
ENST00000662767.1|ENSG00000287630.1|OTTHUMG00000195468.1|OTTHUMT00000527081.1|ENST00000662767|ENSG00000287630|2375|	0.144098	0.00163594	0.0261336
ENST00000436290.2|ENSG00000228824.8|OTTHUMG00000017166.7|OTTHUMT00000045413.2|MIR4500HG-201|MIR4500HG|1675|	0.144088	0.00163692	0.0261336
ENST00000686887.1|ENSG00000257443.2|OTTHUMG00000169941.1|-|LRIG3-DT-202|LRIG3-DT|1634|	0.144039	0.00164196	0.0261871
ENST00000527110.2|ENSG00000254575.2|OTTHUMG00000165500.2|OTTHUMT00000384493.2|ENST00000527110|ENSG00000254575|701|	0.143924	0.00165372	0.026345
ENST00000645232.1|ENSG00000285278.1|OTTHUMG00000192394.1|OTTHUMT00000493790.1|TFAP2A-AS2-201|TFAP2A-AS2|3427|	0.143909	0.00165525	0.026345
ENST00000660403.1|ENSG00000285847.2|OTTHUMG00000192950.2|OTTHUMT00000527960.1|ENST00000660403|ENSG00000285847|3664|	0.143886	0.00165763	0.026356
ENST00000607968.1|ENSG00000272918.1|OTTHUMG00000186296.1|OTTHUMT00000472764.1|ENST00000607968|ENSG00000272918|2646|	0.143861	0.0016602	0.0263698
ENST00000608299.1|ENSG00000272566.1|OTTHUMG00000186463.1|OTTHUMT00000473196.1|ENST00000608299|ENSG00000272566|610|	0.143839	0.00166242	0.0263781
ENST00000703577.1|ENSG00000260777.2|OTTHUMG00000175995.1|-|ENST00000703577|ENSG00000260777|2449|	0.143806	0.00166583	0.0264053
ENST00000609982.1|ENSG00000273226.1|OTTHUMG00000185921.1|OTTHUMT00000471715.1|ENST00000609982|ENSG00000273226|546|	0.143631	0.00168395	0.0266622
ENST00000609858.1|ENSG00000272745.1|OTTHUMG00000186159.1|OTTHUMT00000472337.1|ENST00000609858|ENSG00000272745|672|	0.143617	0.00168546	0.0266622
ENST00000692568.1|ENSG00000288740.1|-|-|ENST00000692568|ENSG00000288740|1801|	0.143579	0.00168944	0.026698
ENST00000559246.1|ENSG00000259336.1|OTTHUMG00000172320.1|OTTHUMT00000417821.1|ENST00000559246|ENSG00000259336|1342|	0.143557	0.00169174	0.0267071
ENST00000602594.1|ENSG00000269930.1|OTTHUMG00000183912.1|OTTHUMT00000467506.1|ENST00000602594|ENSG00000269930|792|	0.143474	0.00170038	0.0268164
ENST00000663764.1|ENSG00000287714.1|OTTHUMG00000195339.1|OTTHUMT00000526407.1|ENST00000663764|ENSG00000287714|1932|	0.143428	0.00170524	0.0268657
ENST00000641744.1|ENSG00000290653.1|-|OTTHUMT00000493269.1|ENST00000641744|ENSG00000290653|3467|	0.143381	0.00171027	0.0269178
ENST00000658889.1|ENSG00000229321.2|OTTHUMG00000154733.6|OTTHUMT00000528476.1|ENST00000658889|ENSG00000229321|3875|	0.143357	0.00171275	0.0269294
ENST00000623855.1|ENSG00000280415.1|OTTHUMG00000168491.1|OTTHUMT00000399906.1|ENST00000623855|ENSG00000280415|2258|	0.143249	0.00172427	0.0270832
ENST00000613696.1|ENSG00000278727.1|OTTHUMG00000187228.1|OTTHUMT00000474607.1|ENST00000613696|ENSG00000278727|3585|	0.14322	0.00172739	0.0271048
ENST00000688121.1|ENSG00000289175.1|-|-|ENST00000688121|ENSG00000289175|615|	0.143115	0.00173861	0.0272535
ENST00000603220.1|ENSG00000270720.1|OTTHUMG00000185169.1|OTTHUMT00000469717.1|ENST00000603220|ENSG00000270720|588|	0.14301	0.00174992	0.0274031
ENST00000641606.1|ENSG00000290648.1|-|OTTHUMT00000493222.1|ENST00000641606|ENSG00000290648|1038|	0.142976	0.00175359	0.027433
ENST00000604017.1|ENSG00000271382.1|OTTHUMG00000170327.2|OTTHUMT00000408524.2|ENST00000604017|ENSG00000271382|2773|	0.142886	0.00176336	0.0275192
ENST00000621847.1|ENSG00000276853.1|OTTHUMG00000187155.1|OTTHUMT00000474503.1|ENST00000621847|ENSG00000276853|656|	0.142876	0.0017644	0.0275192
ENST00000624364.1|ENSG00000280339.1|OTTHUMG00000167230.1|OTTHUMT00000393817.1|ENST00000624364|ENSG00000280339|3249|	0.142876	0.00176442	0.0275192
ENST00000669908.1|ENSG00000234215.3|OTTHUMG00000156644.4|OTTHUMT00000505991.1|CT66-202|CT66|1901|	0.142845	0.00176776	0.0275438
ENST00000510444.1|ENSG00000249584.1|OTTHUMG00000162198.1|OTTHUMT00000367833.1|LINC02225-201|LINC02225|4069|	0.142702	0.00178344	0.0277602
ENST00000508202.1|ENSG00000250497.1|OTTHUMG00000160355.1|OTTHUMT00000360341.1|ENST00000508202|ENSG00000250497|4781|	0.142529	0.00180252	0.0280292
ENST00000606898.1|ENSG00000272094.1|OTTHUMG00000185352.1|OTTHUMT00000470300.1|ENST00000606898|ENSG00000272094|879|	0.142472	0.00180893	0.0281008
ENST00000658852.1|ENSG00000249307.8|OTTHUMG00000160858.10|OTTHUMT00000507619.2|LINC01088-214|LINC01088|1838|	0.142398	0.00181721	0.0282012
ENST00000690174.1|ENSG00000289279.1|-|-|ENST00000690174|ENSG00000289279|2072|	0.14238	0.0018192	0.0282039
ENST00000649835.1|ENSG00000290597.1|-|OTTHUMT00000499372.1|ENST00000649835|ENSG00000290597|2711|	0.142344	0.00182319	0.0282376
ENST00000623514.1|ENSG00000279659.1|OTTHUMG00000175923.1|OTTHUMT00000431277.1|ENST00000623514|ENSG00000279659|1654|	0.142229	0.00183612	0.0284096
ENST00000618494.1|ENSG00000277087.1|OTTHUMG00000186604.1|OTTHUMT00000473457.1|ENST00000618494|ENSG00000277087|516|	0.14221	0.00183826	0.0284145
ENST00000686250.1|ENSG00000289138.1|-|-|ENST00000686250|ENSG00000289138|1651|	0.142171	0.00184274	0.0284555
ENST00000595906.2|ENSG00000269506.2|OTTHUMG00000187187.1|OTTHUMT00000474554.1|ENST00000595906|ENSG00000269506|1614|	0.142119	0.00184865	0.0285086
ENST00000641088.1|ENSG00000290821.1|-|OTTHUMT00000493648.1|ENST00000641088|ENSG00000290821|5937|	0.142108	0.00184985	0.0285086
ENST00000524295.5|ENSG00000254226.6|OTTHUMG00000163523.4|OTTHUMT00000373979.1|LINC01933-204|LINC01933|3591|	0.14206	0.00185535	0.0285651
ENST00000507248.2|ENSG00000234492.6|OTTHUMG00000161030.3|OTTHUMT00000363481.2|RPL34-DT-202|RPL34-DT|3729|	0.141988	0.0018636	0.0286637
ENST00000380970.2|ENSG00000205628.5|OTTHUMG00000156039.25|OTTHUMT00000342819.1|LINC01446-201|LINC01446|3484|	0.141937	0.00186947	0.0287255
ENST00000655645.1|ENSG00000267098.2|OTTHUMG00000179960.2|OTTHUMT00000522769.1|ENST00000655645|ENSG00000267098|1698|	0.141919	0.00187151	0.0287285
ENST00000517664.1|ENSG00000253636.1|OTTHUMG00000164580.1|OTTHUMT00000379313.1|ENST00000517664|ENSG00000253636|3549|	0.141858	0.00187849	0.0287859
ENST00000473756.1|ENSG00000240476.1|OTTHUMG00000159060.1|OTTHUMT00000353102.1|LINC00973-201|LINC00973|962|	0.141854	0.00187895	0.0287859
ENST00000624681.1|ENSG00000279482.1|OTTHUMG00000173140.1|OTTHUMT00000422247.1|ENST00000624681|ENSG00000279482|714|	0.141782	0.0018873	0.0288853
ENST00000566912.2|ENSG00000260455.2|OTTHUMG00000175902.2|OTTHUMT00000431254.2|NBAT1-201|NBAT1|3692|	0.141754	0.0018905	0.0288935
ENST00000693746.1|ENSG00000289270.1|-|-|ENST00000693746|ENSG00000289270|1996|	0.141745	0.00189155	0.0288935
ENST00000653932.1|ENSG00000286807.1|OTTHUMG00000195693.1|OTTHUMT00000528240.1|ENST00000653932|ENSG00000286807|2839|	0.141594	0.00190913	0.0291334
ENST00000512652.1|ENSG00000249425.1|OTTHUMG00000161427.1|OTTHUMT00000364886.1|LINC02477-201|LINC02477|1417|	0.141547	0.00191474	0.0291905
ENST00000603472.1|ENSG00000270681.1|OTTHUMG00000161448.1|OTTHUMT00000364977.1|ENST00000603472|ENSG00000270681|1113|	0.141521	0.00191771	0.029207
ENST00000646849.1|ENSG00000285108.1|OTTHUMG00000192613.1|OTTHUMT00000497281.1|ENST00000646849|ENSG00000285108|10728|	0.141476	0.00192309	0.0292603
ENST00000623323.1|ENSG00000279481.1|OTTHUMG00000161591.1|OTTHUMT00000365465.1|ENST00000623323|ENSG00000279481|2525|	0.141443	0.00192695	0.0292903
ENST00000615357.1|ENSG00000277550.1|OTTHUMG00000186833.1|OTTHUMT00000473868.1|ENST00000615357|ENSG00000277550|1438|	0.141423	0.00192931	0.0292976
ENST00000657004.1|ENSG00000287505.1|OTTHUMG00000195659.1|OTTHUMT00000528110.1|ENST00000657004|ENSG00000287505|2197|	0.141378	0.00193462	0.0293369
ENST00000624371.1|ENSG00000280190.1|OTTHUMG00000176929.1|OTTHUMT00000434350.1|ENST00000624371|ENSG00000280190|2072|	0.141369	0.00193567	0.0293369
ENST00000495159.1|ENSG00000244321.1|OTTHUMG00000158209.1|OTTHUMT00000350406.1|LINC01326-201|LINC01326|755|	0.141341	0.00193907	0.0293597
ENST00000615349.1|ENSG00000276957.1|OTTHUMG00000187286.1|OTTHUMT00000474706.1|ENST00000615349|ENSG00000276957|536|	0.141301	0.00194371	0.0294015
ENST00000655005.1|ENSG00000286313.2|OTTHUMG00000195567.1|OTTHUMT00000527563.1|ENST00000655005|ENSG00000286313|2129|	0.141117	0.0019658	0.0297067
ENST00000634588.1|ENSG00000282890.1|OTTHUMG00000191579.1|OTTHUMT00000488613.1|ENST00000634588|ENSG00000282890|2698|	0.141074	0.001971	0.0297564
ENST00000662499.1|ENSG00000287159.1|OTTHUMG00000193933.1|OTTHUMT00000507247.1|ENST00000662499|ENSG00000287159|1067|	0.141034	0.00197583	0.0298003
ENST00000623046.1|ENSG00000278898.1|OTTHUMG00000172340.1|OTTHUMT00000418010.1|ENST00000623046|ENSG00000278898|2468|	0.140988	0.00198132	0.0298542
ENST00000519427.1|ENSG00000253726.1|OTTHUMG00000164491.1|OTTHUMT00000378981.1|ENST00000519427|ENSG00000253726|1722|	0.140905	0.00199144	0.0299777
ENST00000654227.3|ENSG00000238142.4|OTTHUMG00000002204.5|OTTHUMT00000508711.1|ENST00000654227|ENSG00000238142|1666|	0.140843	0.00199897	0.0300618
ENST00000660950.1|ENSG00000287818.1|OTTHUMG00000195448.1|OTTHUMT00000526936.1|ENST00000660950|ENSG00000287818|1608|	0.140826	0.00200102	0.0300637
ENST00000518540.5|ENSG00000253658.6|OTTHUMG00000164460.16|OTTHUMT00000378873.1|LINC01592-202|LINC01592|2367|	0.140799	0.00200436	0.0300848
ENST00000668509.1|ENSG00000249460.2|OTTHUMG00000160700.3|OTTHUMT00000515136.1|LINC02500-202|LINC02500|1328|	0.14073	0.00201285	0.0301831
ENST00000659914.1|ENSG00000236206.2|OTTHUMG00000034564.4|OTTHUMT00000518112.1|ENST00000659914|ENSG00000236206|1150|	0.140591	0.00202997	0.0304104
ENST00000664094.1|ENSG00000235026.8|OTTHUMG00000153346.2|OTTHUMT00000527675.1|DPP10-AS1-203|DPP10-AS1|3965|	0.140433	0.00204968	0.0306761
ENST00000483636.7|ENSG00000291076.1|-|OTTHUMT00000357891.1|AADACP1-205|AADACP1|1400|	0.140246	0.00207311	0.0309679
ENST00000558671.1|ENSG00000259690.1|OTTHUMG00000172187.1|OTTHUMT00000417259.1|ENST00000558671|ENSG00000259690|3355|	0.140241	0.00207373	0.0309679
ENST00000660673.1|ENSG00000225280.7|OTTHUMG00000032023.3|OTTHUMT00000521960.1|ENST00000660673|ENSG00000225280|1066|	0.14023	0.00207515	0.0309679
ENST00000624242.1|ENSG00000279666.1|OTTHUMG00000176026.1|OTTHUMT00000431399.1|ENST00000624242|ENSG00000279666|1800|	0.13999	0.00210568	0.0313935
ENST00000656900.1|ENSG00000288030.1|OTTHUMG00000195858.1|OTTHUMT00000529077.1|ENST00000656900|ENSG00000288030|1851|	0.13996	0.00210957	0.0314213
ENST00000595532.1|ENSG00000290704.1|-|OTTHUMT00000462212.1|ENST00000595532|ENSG00000290704|1125|	0.139929	0.0021135	0.0314497
ENST00000638173.1|ENSG00000284052.1|OTTHUMG00000191990.1|OTTHUMT00000491875.1|ENST00000638173|ENSG00000284052|4744|	0.139898	0.00211755	0.0314798
ENST00000667608.1|ENSG00000247199.6|OTTHUMG00000163558.5|OTTHUMT00000524375.1|FBXO38-DT-211|FBXO38-DT|2991|	0.139834	0.00212572	0.0315475
ENST00000608512.1|ENSG00000273365.1|OTTHUMG00000186434.1|OTTHUMT00000473144.1|ENST00000608512|ENSG00000273365|729|	0.139831	0.00212616	0.0315475
ENST00000610119.1|ENSG00000272755.1|OTTHUMG00000186408.2|OTTHUMT00000473106.2|ENST00000610119|ENSG00000272755|565|	0.139788	0.00213173	0.0316
ENST00000642091.1|ENSG00000290478.1|-|OTTHUMT00000493093.1|ENST00000642091|ENSG00000290478|1883|	0.139772	0.00213386	0.0316015
ENST00000514840.1|ENSG00000249664.1|OTTHUMG00000162781.1|OTTHUMT00000370383.1|ENST00000514840|ENSG00000249664|825|	0.13973	0.00213932	0.0316287
ENST00000562820.1|ENSG00000260871.1|OTTHUMG00000174459.1|OTTHUMT00000426657.1|ENST00000562820|ENSG00000260871|896|	0.139717	0.0021409	0.0316287
ENST00000657704.1|ENSG00000287695.1|OTTHUMG00000195422.1|OTTHUMT00000526838.1|ENST00000657704|ENSG00000287695|1730|	0.13971	0.0021418	0.0316287
ENST00000624173.1|ENSG00000279968.3|OTTHUMG00000189248.2|OTTHUMT00000479168.1|CCDC28A-AS1-202|CCDC28A-AS1|2685|	0.139654	0.00214911	0.0317065
ENST00000623763.1|ENSG00000279512.1|OTTHUMG00000187122.1|OTTHUMT00000474454.1|ENST00000623763|ENSG00000279512|2049|	0.139598	0.00215654	0.0317859
ENST00000504339.1|ENSG00000248908.1|OTTHUMG00000161889.1|OTTHUMT00000366297.1|LINC02239-201|LINC02239|2290|	0.139558	0.00216169	0.0318317
ENST00000665990.1|ENSG00000286539.1|OTTHUMG00000195696.1|OTTHUMT00000528293.1|ENST00000665990|ENSG00000286539|2334|	0.139522	0.0021664	0.0318709
ENST00000591936.1|ENSG00000267298.1|OTTHUMG00000182077.1|OTTHUMT00000459163.1|ENST00000591936|ENSG00000267298|559|	0.139482	0.0021717	0.0319186
ENST00000623435.1|ENSG00000279513.1|OTTHUMG00000183891.1|OTTHUMT00000467348.1|ENST00000623435|ENSG00000279513|1492|	0.139443	0.00217688	0.03194
ENST00000624360.1|ENSG00000279598.1|OTTHUMG00000180306.1|OTTHUMT00000450682.1|ENST00000624360|ENSG00000279598|4406|	0.13944	0.00217726	0.03194
ENST00000604156.1|ENSG00000271427.1|OTTHUMG00000185248.1|OTTHUMT00000469974.1|ENST00000604156|ENSG00000271427|575|	0.139392	0.00218364	0.0320034
ENST00000609775.1|ENSG00000273232.1|OTTHUMG00000186240.1|OTTHUMT00000472467.1|ENST00000609775|ENSG00000273232|533|	0.139367	0.00218698	0.0320221
ENST00000514293.1|ENSG00000249847.1|OTTHUMG00000161221.1|OTTHUMT00000364202.1|ENST00000514293|ENSG00000249847|646|	0.13915	0.00221589	0.032407
ENST00000579651.1|ENSG00000264705.1|OTTHUMG00000178555.1|OTTHUMT00000442448.1|ENST00000579651|ENSG00000264705|2074|	0.139139	0.00221743	0.032407
ENST00000659759.1|ENSG00000225539.9|OTTHUMG00000154350.14|OTTHUMT00000506406.1|LINC01821-211|LINC01821|1974|	0.139117	0.00222026	0.0324179
ENST00000624777.1|ENSG00000278991.1|OTTHUMG00000177201.1|OTTHUMT00000435829.1|ENST00000624777|ENSG00000278991|1514|	0.138934	0.00224506	0.0327492
ENST00000653599.1|ENSG00000286523.1|OTTHUMG00000194988.1|OTTHUMT00000523541.1|ENST00000653599|ENSG00000286523|3066|	0.138854	0.00225593	0.0328769
ENST00000561961.2|ENSG00000261094.2|OTTHUMG00000175504.3|OTTHUMT00000430302.2|ENST00000561961|ENSG00000261094|1993|	0.138771	0.00226731	0.0330118
ENST00000653695.1|ENSG00000267144.2|OTTHUMG00000182308.2|OTTHUMT00000525754.1|ZNF222-DT-202|ZNF222-DT|1042|	0.138719	0.00227447	0.0330852
ENST00000578633.2|ENSG00000266304.2|OTTHUMG00000178698.1|OTTHUMT00000443006.1|LIVAR-201|LIVAR|812|	0.138698	0.00227742	0.033097
ENST00000686675.1|ENSG00000289413.1|-|-|ENST00000686675|ENSG00000289413|2277|	0.138532	0.00230032	0.0333987
ENST00000508713.1|ENSG00000250069.1|OTTHUMG00000163412.1|OTTHUMT00000373269.1|ENST00000508713|ENSG00000250069|3025|	0.138516	0.00230259	0.0334005
ENST00000624289.1|ENSG00000279344.1|OTTHUMG00000173214.1|OTTHUMT00000422487.1|ENST00000624289|ENSG00000279344|2594|	0.138482	0.00230733	0.0334381
ENST00000501169.3|ENSG00000248079.4|OTTHUMG00000172347.2|OTTHUMT00000418019.2|DPH6-DT-201|DPH6-DT|2716|	0.138428	0.00231476	0.0335144
ENST00000604855.3|ENSG00000271009.3|OTTHUMG00000185615.2|OTTHUMT00000470854.2|ENST00000604855|ENSG00000271009|2072|	0.138318	0.0023303	0.0336956
ENST00000578585.1|ENSG00000264215.1|OTTHUMG00000175982.1|OTTHUMT00000431344.1|ENST00000578585|ENSG00000264215|1514|	0.138308	0.0023316	0.0336956
ENST00000624218.1|ENSG00000278900.1|OTTHUMG00000162375.1|OTTHUMT00000368660.1|ENST00000624218|ENSG00000278900|587|	0.13828	0.00233561	0.0337222
ENST00000565748.1|ENSG00000261604.1|OTTHUMG00000175405.1|OTTHUMT00000429881.1|ENST00000565748|ENSG00000261604|2125|	0.138229	0.00234277	0.0337789
ENST00000660833.1|ENSG00000286954.1|OTTHUMG00000195232.1|OTTHUMT00000525471.1|ENST00000660833|ENSG00000286954|3196|	0.138221	0.00234389	0.0337789
ENST00000455947.2|ENSG00000238284.2|OTTHUMG00000155126.2|OTTHUMT00000338493.2|LINC01448-201|LINC01448|1181|	0.138145	0.00235475	0.0339041
ENST00000641135.1|ENSG00000290702.1|-|OTTHUMT00000493543.1|ENST00000641135|ENSG00000290702|1506|	0.138117	0.00235869	0.0339293
ENST00000654019.1|ENSG00000287060.1|OTTHUMG00000195512.1|OTTHUMT00000527287.1|ENST00000654019|ENSG00000287060|3597|	0.138034	0.00237045	0.034067
ENST00000651734.1|ENSG00000176728.10|OTTHUMG00000036505.19|OTTHUMT00000504141.1|TTTY14-214|TTTY14|7093|	0.138011	0.00237386	0.0340846
ENST00000507365.1|ENSG00000251632.1|OTTHUMG00000161349.1|OTTHUMT00000364620.1|LINC02172-201|LINC02172|2264|	0.137906	0.00238883	0.0342678
ENST00000663193.1|ENSG00000286652.1|OTTHUMG00000195581.1|OTTHUMT00000527604.1|ENST00000663193|ENSG00000286652|2199|	0.137843	0.00239788	0.034366
ENST00000642116.1|ENSG00000290826.1|-|OTTHUMT00000492680.1|ENST00000642116|ENSG00000290826|1414|	0.137717	0.00241615	0.0345958
ENST00000602342.1|ENSG00000269984.1|OTTHUMG00000184028.1|OTTHUMT00000467805.1|ENST00000602342|ENSG00000269984|3143|	0.137666	0.00242363	0.034671
ENST00000615947.1|ENSG00000215483.12|OTTHUMG00000016772.17|OTTHUMT00000474816.1|LINC00598-206|LINC00598|3541|	0.137617	0.00243072	0.0346974
ENST00000692305.1|ENSG00000288866.1|-|-|ENST00000692305|ENSG00000288866|1347|	0.137605	0.00243256	0.0346974
ENST00000659932.1|ENSG00000287044.1|OTTHUMG00000195366.1|OTTHUMT00000526639.1|ENST00000659932|ENSG00000287044|4211|	0.137604	0.00243273	0.0346974
ENST00000460754.1|ENSG00000272610.1|OTTHUMG00000186069.1|OTTHUMT00000472174.1|MAGI1-IT1-201|MAGI1-IT1|2567|	0.137578	0.0024365	0.0346974
ENST00000423715.1|ENSG00000230894.2|OTTHUMG00000020557.2|OTTHUMT00000053802.1|ENST00000423715|ENSG00000230894|4996|	0.137577	0.00243663	0.0346974
ENST00000620106.1|ENSG00000275854.1|OTTHUMG00000187264.1|OTTHUMT00000474662.1|ENST00000620106|ENSG00000275854|731|	0.137529	0.00244369	0.034766
ENST00000658004.1|ENSG00000246067.10|OTTHUMG00000167010.9|OTTHUMT00000507225.2|RAB30-DT-211|RAB30-DT|1719|	0.137514	0.00244592	0.034766
ENST00000619744.1|ENSG00000277342.1|OTTHUMG00000187209.1|OTTHUMT00000474581.1|ENST00000619744|ENSG00000277342|527|	0.137418	0.0024601	0.0349357
ENST00000620124.1|ENSG00000273951.1|OTTHUMG00000186892.1|OTTHUMT00000473971.1|ENST00000620124|ENSG00000273951|655|	0.137381	0.0024655	0.0349804
ENST00000651719.1|ENSG00000285999.1|OTTHUMG00000192864.1|OTTHUMT00000499410.1|ENST00000651719|ENSG00000285999|1759|	0.137302	0.00247728	0.0351156
ENST00000578701.5|ENSG00000260372.7|OTTHUMG00000131954.10|OTTHUMT00000446548.1|AQP4-AS1-202|AQP4-AS1|2177|	0.1372	0.00249253	0.0352995
ENST00000664048.1|ENSG00000287132.1|OTTHUMG00000195083.1|OTTHUMT00000524353.1|ENST00000664048|ENSG00000287132|2181|	0.13717	0.00249698	0.0353303
ENST00000659469.1|ENSG00000286975.1|OTTHUMG00000194982.1|OTTHUMT00000523525.1|ENST00000659469|ENSG00000286975|1690|	0.137021	0.0025194	0.0356152
ENST00000547179.1|ENSG00000258169.1|OTTHUMG00000169965.1|OTTHUMT00000406691.1|LINC00485-201|LINC00485|3722|	0.136868	0.00254265	0.0359106
ENST00000610578.4|ENSG00000291158.1|-|OTTHUMT00000038338.3|LINC00869-207|LINC00869|5734|	0.136853	0.00254492	0.0359106
ENST00000671380.1|ENSG00000287357.1|OTTHUMG00000194919.1|OTTHUMT00000523125.1|ENST00000671380|ENSG00000287357|2355|	0.136743	0.00256171	0.0361147
ENST00000666585.1|ENSG00000286558.1|OTTHUMG00000195572.1|OTTHUMT00000527570.1|ENST00000666585|ENSG00000286558|1466|	0.136718	0.00256561	0.0361369
ENST00000662407.1|ENSG00000286422.2|OTTHUMG00000194805.1|OTTHUMT00000522240.1|ENST00000662407|ENSG00000286422|1323|	0.136693	0.00256947	0.0361586
ENST00000609434.1|ENSG00000272791.1|OTTHUMG00000186447.1|OTTHUMT00000473164.1|ENST00000609434|ENSG00000272791|935|	0.136649	0.00257612	0.0362194
ENST00000625082.1|ENSG00000280120.1|OTTHUMG00000168850.1|OTTHUMT00000401363.1|ENST00000625082|ENSG00000280120|1054|	0.136629	0.00257924	0.0362305
ENST00000641304.1|ENSG00000284634.1|OTTHUMG00000164997.5|OTTHUMT00000492853.1|ENST00000641304|ENSG00000284634|2767|	0.13656	0.00258987	0.0363296
ENST00000651362.1|ENSG00000286060.1|OTTHUMG00000192682.1|OTTHUMT00000498832.1|ENST00000651362|ENSG00000286060|2508|	0.136553	0.00259097	0.0363296
ENST00000662570.1|ENSG00000286800.1|OTTHUMG00000194321.1|OTTHUMT00000514372.1|ENST00000662570|ENSG00000286800|934|	0.136493	0.00260027	0.0363963
ENST00000627671.1|ENSG00000280958.1|OTTHUMG00000189691.1|OTTHUMT00000480301.1|ENST00000627671|ENSG00000280958|721|	0.136493	0.0026004	0.0363963
ENST00000623230.1|ENSG00000279814.1|OTTHUMG00000183089.1|OTTHUMT00000465046.1|ENST00000623230|ENSG00000279814|1645|	0.136402	0.00261446	0.0365602
ENST00000667705.1|ENSG00000286844.1|OTTHUMG00000194423.1|OTTHUMT00000516121.1|ENST00000667705|ENSG00000286844|1281|	0.136236	0.00264055	0.0368915
ENST00000623707.1|ENSG00000279267.1|OTTHUMG00000176151.1|OTTHUMT00000431572.1|ENST00000623707|ENSG00000279267|2042|	0.136221	0.0026429	0.0368915
ENST00000607405.1|ENSG00000272515.1|OTTHUMG00000185757.1|OTTHUMT00000471171.1|ENST00000607405|ENSG00000272515|1328|	0.136178	0.00264973	0.0369536
ENST00000590604.1|ENSG00000267311.1|OTTHUMG00000179833.1|OTTHUMT00000448436.1|ENST00000590604|ENSG00000267311|1100|	0.136029	0.00267344	0.0372509
ENST00000612997.1|ENSG00000274281.1|OTTHUMG00000186811.1|OTTHUMT00000473820.1|ENST00000612997|ENSG00000274281|2127|	0.135982	0.00268101	0.0373229
ENST00000665012.1|ENSG00000254180.2|OTTHUMG00000163969.2|OTTHUMT00000527940.1|ENST00000665012|ENSG00000254180|3662|	0.135965	0.00268368	0.0373266
ENST00000457383.1|ENSG00000230001.1|OTTHUMG00000019462.1|OTTHUMT00000051556.1|ENST00000457383|ENSG00000230001|635|	0.135855	0.00270126	0.0375376
ENST00000608412.1|ENSG00000273319.1|OTTHUMG00000186335.1|OTTHUMT00000472960.1|ENST00000608412|ENSG00000273319|3198|	0.135756	0.00271729	0.0377267
ENST00000620266.1|ENSG00000278730.1|OTTHUMG00000186693.1|OTTHUMT00000473628.1|ENST00000620266|ENSG00000278730|2921|	0.135682	0.00272937	0.0378606
ENST00000658284.1|ENSG00000286420.1|OTTHUMG00000195280.1|OTTHUMT00000525786.1|ENST00000658284|ENSG00000286420|792|	0.135601	0.00274246	0.0380082
ENST00000663390.1|ENSG00000286327.1|OTTHUMG00000194701.1|OTTHUMT00000521000.1|ENST00000663390|ENSG00000286327|3341|	0.135574	0.00274694	0.0380365
ENST00000660274.1|ENSG00000286568.1|OTTHUMG00000195851.1|OTTHUMT00000529060.1|ENST00000660274|ENSG00000286568|1555|	0.135517	0.00275633	0.0381326
ENST00000660707.1|ENSG00000286529.1|OTTHUMG00000194893.1|OTTHUMT00000522959.1|ENST00000660707|ENSG00000286529|1467|	0.13548	0.00276233	0.0381816
ENST00000653117.1|ENSG00000287816.1|OTTHUMG00000195578.1|OTTHUMT00000527594.1|ENST00000653117|ENSG00000287816|1623|	0.135445	0.00276807	0.038227
ENST00000666335.2|ENSG00000287804.3|OTTHUMG00000194844.1|OTTHUMT00000522547.1|ENST00000666335|ENSG00000287804|1377|	0.135423	0.00277179	0.0382442
ENST00000669860.1|ENSG00000251244.3|OTTHUMG00000161799.3|OTTHUMT00000525217.1|ENST00000669860|ENSG00000251244|3487|	0.135236	0.00280276	0.0386373
ENST00000689236.1|ENSG00000288890.1|-|-|ENST00000689236|ENSG00000288890|1022|	0.135191	0.00281027	0.0387065
ENST00000411575.5|ENSG00000225564.6|OTTHUMG00000020399.3|OTTHUMT00000053466.2|LINC01492-201|LINC01492|3738|	0.135171	0.00281368	0.0387193
ENST00000541160.7|ENSG00000291130.1|-|OTTHUMT00000465070.1|ENST00000541160|ENSG00000291130|1129|	0.135132	0.00282009	0.0387731
ENST00000610128.2|ENSG00000273033.2|OTTHUMG00000185944.2|OTTHUMT00000471805.2|LINC02035-201|LINC02035|5476|	0.134985	0.00284482	0.0390785
ENST00000427439.1|ENSG00000233410.1|OTTHUMG00000035892.1|OTTHUMT00000087441.1|LINC01222-201|LINC01222|1785|	0.134925	0.00285508	0.0391849
ENST00000687415.1|ENSG00000289617.1|-|-|ENST00000687415|ENSG00000289617|813|	0.134728	0.0028886	0.0396101
ENST00000658143.1|ENSG00000287496.1|OTTHUMG00000193547.1|OTTHUMT00000503395.1|ENST00000658143|ENSG00000287496|1230|	0.134626	0.0029061	0.0398149
ENST00000614966.1|ENSG00000274667.1|OTTHUMG00000186904.1|OTTHUMT00000473988.1|ENST00000614966|ENSG00000274667|680|	0.134562	0.00291716	0.039929
ENST00000663058.1|ENSG00000254394.2|OTTHUMG00000164605.2|OTTHUMT00000527510.1|ENST00000663058|ENSG00000254394|1770|	0.134548	0.00291957	0.039929
ENST00000687924.2|ENSG00000288875.2|-|-|ENST00000687924|ENSG00000288875|2482|	0.134493	0.002929	0.0399823
ENST00000660712.1|ENSG00000241131.2|OTTHUMG00000159502.6|OTTHUMT00000528115.1|LINC02032-206|LINC02032|1430|	0.134479	0.00293146	0.0399823
ENST00000655828.1|ENSG00000236714.3|OTTHUMG00000059704.26|OTTHUMT00000515674.1|LINC01844-206|LINC01844|2855|	0.134464	0.00293416	0.0399823
ENST00000608422.1|ENSG00000272866.1|OTTHUMG00000185907.1|OTTHUMT00000471680.1|ENST00000608422|ENSG00000272866|615|	0.134454	0.00293593	0.0399823
ENST00000566976.1|ENSG00000260046.1|OTTHUMG00000172925.1|OTTHUMT00000421362.1|ENST00000566976|ENSG00000260046|1625|	0.134451	0.00293632	0.0399823
ENST00000665531.1|ENSG00000287048.1|OTTHUMG00000194676.1|OTTHUMT00000520571.1|ENST00000665531|ENSG00000287048|1624|	0.13441	0.00294354	0.0400455
ENST00000685133.1|ENSG00000289584.1|-|-|ENST00000685133|ENSG00000289584|619|	0.13433	0.0029574	0.040199
ENST00000658670.1|ENSG00000286432.1|OTTHUMG00000194461.1|OTTHUMT00000516651.1|ENST00000658670|ENSG00000286432|967|	0.134292	0.00296416	0.0402556
ENST00000426991.2|ENSG00000229152.2|OTTHUMG00000046190.2|OTTHUMT00000106495.2|ANKRD10-IT1-201|ANKRD10-IT1|800|	0.134274	0.00296723	0.0402622
ENST00000642086.1|ENSG00000290819.1|-|OTTHUMT00000492910.1|ENST00000642086|ENSG00000290819|985|	0.134256	0.00297045	0.0402707
ENST00000641132.1|ENSG00000290694.1|-|OTTHUMT00000493476.1|ENST00000641132|ENSG00000290694|1178|	0.134231	0.00297489	0.0402957
ENST00000503998.1|ENSG00000250511.1|OTTHUMG00000161116.2|OTTHUMT00000363853.2|ENST00000503998|ENSG00000250511|1447|	0.134106	0.00299693	0.0405537
ENST00000606298.1|ENSG00000271967.1|OTTHUMG00000185770.1|OTTHUMT00000471207.1|ENST00000606298|ENSG00000271967|543|	0.134086	0.00300042	0.0405537
ENST00000623911.1|ENSG00000279149.1|OTTHUMG00000187210.1|OTTHUMT00000474583.1|ENST00000623911|ENSG00000279149|2496|	0.134079	0.00300176	0.0405537
ENST00000655452.1|ENSG00000227863.3|OTTHUMG00000153911.13|OTTHUMT00000518338.1|ENST00000655452|ENSG00000227863|1177|	0.134012	0.00301357	0.040678
ENST00000665690.1|ENSG00000230645.2|OTTHUMG00000153755.4|OTTHUMT00000525005.1|LINC01818-203|LINC01818|1270|	0.133899	0.00303379	0.0408812
ENST00000357412.2|ENSG00000196741.5|OTTHUMG00000021445.1|OTTHUMT00000056417.1|LINC01560-201|LINC01560|1253|	0.133881	0.00303701	0.0408812
ENST00000620246.1|ENSG00000277767.1|OTTHUMG00000187282.1|OTTHUMT00000474694.1|ENST00000620246|ENSG00000277767|1824|	0.133872	0.0030386	0.0408812
ENST00000537616.1|ENSG00000257027.1|OTTHUMG00000168442.1|OTTHUMT00000399756.1|ENST00000537616|ENSG00000257027|2508|	0.133869	0.00303914	0.0408812
ENST00000631744.1|ENSG00000282798.1|OTTHUMG00000190399.1|OTTHUMT00000484821.1|ENST00000631744|ENSG00000282798|806|	0.133848	0.00304293	0.0408968
ENST00000615020.1|ENSG00000203334.5|OTTHUMG00000186821.1|OTTHUMT00000473840.1|ENST00000615020|ENSG00000203334|2080|	0.133686	0.00307212	0.0412324
ENST00000566420.2|ENSG00000261745.2|OTTHUMG00000175919.2|OTTHUMT00000431273.2|ENST00000566420|ENSG00000261745|503|	0.133665	0.00307604	0.0412324
ENST00000661767.1|ENSG00000259668.6|OTTHUMG00000172525.2|OTTHUMT00000526787.1|ENST00000661767|ENSG00000259668|3042|	0.133656	0.00307769	0.0412324
ENST00000661503.1|ENSG00000288101.1|OTTHUMG00000194986.1|OTTHUMT00000523536.1|ENST00000661503|ENSG00000288101|933|	0.133651	0.00307851	0.0412324
ENST00000657197.1|ENSG00000286429.1|OTTHUMG00000194270.1|OTTHUMT00000513605.1|ENST00000657197|ENSG00000286429|1206|	0.133554	0.00309622	0.041434
ENST00000657031.1|ENSG00000233124.2|OTTHUMG00000017237.2|OTTHUMT00000522717.1|LINC00456-202|LINC00456|4397|	0.133527	0.00310106	0.041463
ENST00000425636.6|ENSG00000227617.9|OTTHUMG00000153980.7|OTTHUMT00000333302.2|CERS6-AS1-201|CERS6-AS1|2890|	0.133474	0.0031109	0.0415405
ENST00000608095.1|ENSG00000272807.1|OTTHUMG00000186312.1|OTTHUMT00000472845.1|ENST00000608095|ENSG00000272807|740|	0.133467	0.00311219	0.0415405
ENST00000534336.2|ENSG00000251562.10|OTTHUMG00000166322.5|OTTHUMT00000389143.1|MALAT1-202|MALAT1|8762|	0.133442	0.00311669	0.0415647
ENST00000624916.1|ENSG00000280399.1|OTTHUMG00000175812.1|OTTHUMT00000431117.1|ENST00000624916|ENSG00000280399|3691|	0.133402	0.00312405	0.0416272
ENST00000687285.1|ENSG00000288828.1|-|-|ENST00000687285|ENSG00000288828|2183|	0.133298	0.00314331	0.0418396
ENST00000654632.1|ENSG00000286828.1|OTTHUMG00000195207.1|OTTHUMT00000525305.1|ENST00000654632|ENSG00000286828|2402|	0.133287	0.00314537	0.0418396
ENST00000663040.1|ENSG00000287245.1|OTTHUMG00000194904.1|OTTHUMT00000523036.1|ENST00000663040|ENSG00000287245|3696|	0.133199	0.00316165	0.0420202
ENST00000652284.1|ENSG00000286048.1|OTTHUMG00000192798.1|OTTHUMT00000499172.1|ENST00000652284|ENSG00000286048|1942|	0.133158	0.00316927	0.0420698
ENST00000591183.1|ENSG00000267724.1|OTTHUMG00000180357.1|OTTHUMT00000450927.1|ENST00000591183|ENSG00000267724|2117|	0.13315	0.00317079	0.0420698
ENST00000607624.1|ENSG00000272087.1|OTTHUMG00000185347.1|OTTHUMT00000470275.1|ENST00000607624|ENSG00000272087|649|	0.133096	0.00318077	0.0421662
ENST00000623656.1|ENSG00000279926.1|OTTHUMG00000187087.1|OTTHUMT00000474401.1|ENST00000623656|ENSG00000279926|1458|	0.133016	0.00319588	0.0423305
ENST00000621825.1|ENSG00000277935.1|OTTHUMG00000186750.1|OTTHUMT00000473714.1|ENST00000621825|ENSG00000277935|546|	0.132932	0.00321171	0.0424854
ENST00000539313.1|ENSG00000256588.1|OTTHUMG00000167727.1|OTTHUMT00000395917.1|ENST00000539313|ENSG00000256588|630|	0.132925	0.00321304	0.0424854
ENST00000657928.1|ENSG00000286634.1|OTTHUMG00000194638.1|-|ENST00000657928|ENSG00000286634|1225|	0.132822	0.00323253	0.0427067
ENST00000623685.1|ENSG00000280040.1|OTTHUMG00000186070.1|OTTHUMT00000472175.1|ENST00000623685|ENSG00000280040|672|	0.132778	0.00324089	0.0427809
ENST00000531549.1|ENSG00000254556.1|OTTHUMG00000165426.1|OTTHUMT00000383956.1|ENST00000531549|ENSG00000254556|1710|	0.132756	0.00324504	0.0427993
ENST00000654899.1|ENSG00000288036.1|OTTHUMG00000195026.1|OTTHUMT00000523826.1|ENST00000654899|ENSG00000288036|771|	0.132689	0.00325788	0.0429323
ENST00000617439.1|ENSG00000278576.1|OTTHUMG00000188630.1|OTTHUMT00000477766.1|ENST00000617439|ENSG00000278576|3178|	0.132643	0.00326665	0.0429893
ENST00000624663.1|ENSG00000280451.1|OTTHUMG00000175931.1|OTTHUMT00000431285.1|ENST00000624663|ENSG00000280451|1212|	0.132637	0.00326774	0.0429893
ENST00000379640.1|ENSG00000205325.4|OTTHUMG00000058812.5|OTTHUMT00000130001.1|ENST00000379640|ENSG00000205325|2998|	0.13262	0.003271	0.0429958
ENST00000414190.6|ENSG00000291026.1|-|OTTHUMT00000418579.1|ENST00000414190|ENSG00000291026|2337|	0.132541	0.00328633	0.0431609
ENST00000614934.1|ENSG00000277840.1|OTTHUMG00000187138.1|OTTHUMT00000474474.1|ENST00000614934|ENSG00000277840|690|	0.132524	0.00328953	0.0431663
ENST00000624383.1|ENSG00000279416.1|OTTHUMG00000180260.1|OTTHUMT00000450497.1|ENST00000624383|ENSG00000279416|1302|	0.132481	0.00329775	0.0432378
ENST00000581987.1|ENSG00000263720.1|OTTHUMG00000178494.1|OTTHUMT00000442210.1|ENST00000581987|ENSG00000263720|792|	0.132376	0.00331822	0.0434695
ENST00000690302.1|ENSG00000291144.1|-|-|ENST00000690302|ENSG00000291144|1622|	0.132292	0.00333452	0.0436063
ENST00000605991.1|ENSG00000272076.1|OTTHUMG00000185455.1|OTTHUMT00000470555.1|ENST00000605991|ENSG00000272076|572|	0.132288	0.00333532	0.0436063
ENST00000669633.1|ENSG00000287605.1|OTTHUMG00000195856.1|OTTHUMT00000529074.1|ENST00000669633|ENSG00000287605|1197|	0.132266	0.00333966	0.0436063
ENST00000611703.1|ENSG00000274340.1|OTTHUMG00000172312.1|OTTHUMT00000417789.1|ENST00000611703|ENSG00000274340|1549|	0.132265	0.00333987	0.0436063
ENST00000642115.2|ENSG00000285042.1|OTTHUMG00000161956.3|OTTHUMT00000493654.2|ENST00000642115|ENSG00000285042|720|	0.132208	0.003351	0.0437149
ENST00000607434.1|ENSG00000272356.1|OTTHUMG00000185816.1|OTTHUMT00000471369.1|ENST00000607434|ENSG00000272356|4315|	0.132166	0.00335923	0.0437855
ENST00000636819.1|ENSG00000249738.10|OTTHUMG00000163541.5|OTTHUMT00000489653.1|ENST00000636819|ENSG00000249738|4154|	0.132138	0.00336486	0.0438221
ENST00000415437.1|ENSG00000232892.1|OTTHUMG00000033126.1|OTTHUMT00000080684.1|RGS5-AS1-201|RGS5-AS1|2633|	0.132066	0.00337888	0.0439678
ENST00000552378.2|ENSG00000257294.2|OTTHUMG00000169926.2|OTTHUMT00000406593.2|ENST00000552378|ENSG00000257294|989|	0.132009	0.0033903	0.0440614
ENST00000613987.1|ENSG00000273786.1|OTTHUMG00000186815.1|OTTHUMT00000473824.1|ENST00000613987|ENSG00000273786|684|	0.132	0.003392	0.0440614
ENST00000648202.1|ENSG00000285902.1|OTTHUMG00000193152.1|OTTHUMT00000500306.1|ENST00000648202|ENSG00000285902|1287|	0.131987	0.00339457	0.0440614
ENST00000649504.1|ENSG00000285810.1|OTTHUMG00000192784.1|OTTHUMT00000499128.1|ENST00000649504|ENSG00000285810|2337|	0.131953	0.00340147	0.0441142
ENST00000651012.1|ENSG00000286000.1|OTTHUMG00000192884.2|OTTHUMT00000499472.2|ENST00000651012|ENSG00000286000|2772|	0.131894	0.00341307	0.0442277
ENST00000656694.1|ENSG00000287544.1|OTTHUMG00000195326.1|OTTHUMT00000526311.1|ENST00000656694|ENSG00000287544|2604|	0.131813	0.00342927	0.0444006
ENST00000656012.1|ENSG00000287283.1|OTTHUMG00000195655.1|OTTHUMT00000528078.1|ENST00000656012|ENSG00000287283|2154|	0.131771	0.00343768	0.0444383
ENST00000569694.1|ENSG00000261166.1|OTTHUMG00000176095.1|OTTHUMT00000431500.1|ENST00000569694|ENSG00000261166|1444|	0.13177	0.00343789	0.0444383
ENST00000584683.1|ENSG00000266378.1|OTTHUMG00000179687.1|OTTHUMT00000447654.1|ENST00000584683|ENSG00000266378|2140|	0.13173	0.00344596	0.0445056
ENST00000659560.1|ENSG00000286735.1|OTTHUMG00000195133.1|OTTHUMT00000524715.1|ENST00000659560|ENSG00000286735|1466|	0.131683	0.00345549	0.0445578
ENST00000562922.1|ENSG00000260390.1|OTTHUMG00000175783.1|OTTHUMT00000431069.1|ENST00000562922|ENSG00000260390|2084|	0.131682	0.00345574	0.0445578
ENST00000594721.1|ENSG00000268734.1|OTTHUMG00000183033.1|OTTHUMT00000464703.1|ENST00000594721|ENSG00000268734|748|	0.131655	0.00346123	0.0445917
ENST00000498997.3|ENSG00000246477.3|OTTHUMG00000165413.2|OTTHUMT00000383895.2|ENST00000498997|ENSG00000246477|5856|	0.131604	0.00347152	0.0446872
ENST00000566385.2|ENSG00000260388.2|OTTHUMG00000175994.2|OTTHUMT00000431361.2|LINC00562-201|LINC00562|2470|	0.131452	0.00350236	0.0450469
ENST00000658643.1|ENSG00000287901.1|OTTHUMG00000194918.1|OTTHUMT00000523122.1|ENST00000658643|ENSG00000287901|2426|	0.131321	0.00352915	0.0453539
ENST00000662263.1|ENSG00000234899.11|OTTHUMG00000132234.24|OTTHUMT00000509608.2|SOX9-AS1-224|SOX9-AS1|4476|	0.131294	0.0035347	0.0453878
ENST00000623128.1|ENSG00000279108.1|OTTHUMG00000182783.1|OTTHUMT00000463644.1|ENST00000623128|ENSG00000279108|1881|	0.131166	0.00356129	0.0456914
ENST00000562038.1|ENSG00000260804.3|OTTHUMG00000176293.1|OTTHUMT00000431729.1|LINC01963-201|LINC01963|3148|	0.131043	0.00358695	0.0459774
ENST00000427015.1|ENSG00000227681.5|OTTHUMG00000015769.1|OTTHUMT00000042615.1|ENST00000427015|ENSG00000227681|773|	0.13103	0.00358949	0.0459774
ENST00000641219.1|ENSG00000290809.1|-|OTTHUMT00000493325.1|ENST00000641219|ENSG00000290809|1686|	0.130987	0.00359846	0.0460543
ENST00000587106.6|ENSG00000235535.9|OTTHUMG00000015496.15|OTTHUMT00000042049.5|TRDN-AS1-205|TRDN-AS1|2984|	0.130967	0.00360273	0.046069
ENST00000641780.1|ENSG00000290781.1|-|OTTHUMT00000493463.1|ENST00000641780|ENSG00000290781|2063|	0.130954	0.00360553	0.046069
ENST00000610089.1|ENSG00000273375.1|OTTHUMG00000186171.1|OTTHUMT00000472356.1|ENST00000610089|ENSG00000273375|670|	0.130917	0.00361324	0.0461296
ENST00000624377.1|ENSG00000279707.1|OTTHUMG00000180286.1|OTTHUMT00000450582.1|ENST00000624377|ENSG00000279707|529|	0.13086	0.00362535	0.0462335
ENST00000624795.1|ENSG00000279439.1|OTTHUMG00000179534.1|OTTHUMT00000446964.1|ENST00000624795|ENSG00000279439|1862|	0.130837	0.00363017	0.0462335
ENST00000691393.1|ENSG00000289644.1|-|-|ENST00000691393|ENSG00000289644|1411|	0.130836	0.00363029	0.0462335
ENST00000702314.1|ENSG00000289986.1|-|-|ENST00000702314|ENSG00000289986|1576|	0.130784	0.00364132	0.046336
ENST00000502390.5|ENSG00000231683.6|OTTHUMG00000014879.2|OTTHUMT00000359959.1|ENST00000502390|ENSG00000231683|3653|	0.130702	0.00365867	0.0465186
ENST00000693478.1|ENSG00000288966.1|-|-|ENST00000693478|ENSG00000288966|1866|	0.130585	0.00368356	0.0467968
ENST00000434786.2|ENSG00000281195.1|OTTHUMG00000189547.1|OTTHUMT00000327430.2|ENST00000434786|ENSG00000281195|1615|	0.130515	0.00369867	0.0469505
ENST00000623353.1|ENSG00000279557.1|OTTHUMG00000185325.1|OTTHUMT00000470176.1|ENST00000623353|ENSG00000279557|1177|	0.130494	0.00370316	0.0469691
ENST00000455336.2|ENSG00000229587.2|OTTHUMG00000020030.2|OTTHUMT00000052701.2|ENST00000455336|ENSG00000229587|670|	0.130439	0.00371501	0.0470219
ENST00000607518.1|ENSG00000272209.1|OTTHUMG00000185343.1|OTTHUMT00000470252.1|ENST00000607518|ENSG00000272209|1143|	0.130433	0.00371638	0.0470219
ENST00000623873.1|ENSG00000279951.1|OTTHUMG00000175960.1|OTTHUMT00000431316.1|ENST00000623873|ENSG00000279951|1513|	0.130432	0.0037164	0.0470219
ENST00000621730.1|ENSG00000274776.1|OTTHUMG00000186545.1|OTTHUMT00000473321.1|ENST00000621730|ENSG00000274776|2599|	0.130385	0.00372668	0.0471137
ENST00000664032.1|ENSG00000286497.1|OTTHUMG00000194119.1|OTTHUMT00000511285.1|ENST00000664032|ENSG00000286497|1349|	0.130284	0.00374857	0.047352
ENST00000658878.1|ENSG00000286378.1|OTTHUMG00000195770.1|OTTHUMT00000528657.1|ENST00000658878|ENSG00000286378|3414|	0.130246	0.00375675	0.0474168
ENST00000681662.1|ENSG00000288685.1|-|-|ENST00000681662|ENSG00000288685|4813|	0.130216	0.00376341	0.0474623
ENST00000669705.1|ENSG00000286780.1|OTTHUMG00000194785.1|OTTHUMT00000521965.1|ENST00000669705|ENSG00000286780|2370|	0.130189	0.00376922	0.047497
ENST00000685046.1|ENSG00000288803.1|-|-|ENST00000685046|ENSG00000288803|2167|	0.130079	0.00379325	0.0477611
ENST00000625042.1|ENSG00000280345.1|OTTHUMG00000168677.1|OTTHUMT00000400581.1|ENST00000625042|ENSG00000280345|715|	0.13005	0.00379972	0.047804
ENST00000648493.1|ENSG00000291255.1|-|OTTHUMT00000501508.1|ENST00000648493|ENSG00000291255|1080|	0.130031	0.0038039	0.0478178
ENST00000608591.5|ENSG00000273492.6|OTTHUMG00000186038.2|OTTHUMT00000472109.1|APP-DT-201|APP-DT|1979|	0.129971	0.00381721	0.0479464
ENST00000603682.1|ENSG00000270661.1|OTTHUMG00000185109.1|OTTHUMT00000469618.1|ENST00000603682|ENSG00000270661|1931|	0.129948	0.00382219	0.0479702
ENST00000661060.1|ENSG00000286827.1|OTTHUMG00000195631.1|OTTHUMT00000527899.1|ENST00000661060|ENSG00000286827|2105|	0.129865	0.0038407	0.0481637
ENST00000656423.1|ENSG00000287414.1|OTTHUMG00000195783.1|OTTHUMT00000528721.1|ENST00000656423|ENSG00000287414|2919|	0.129788	0.0038577	0.048291
ENST00000638199.1|ENSG00000236283.5|OTTHUMG00000153999.6|OTTHUMT00000492650.1|ENST00000638199|ENSG00000236283|3611|	0.129785	0.00385843	0.048291
ENST00000644783.1|ENSG00000285361.1|OTTHUMG00000192373.1|OTTHUMT00000493753.1|ENST00000644783|ENSG00000285361|1318|	0.129764	0.0038631	0.048291
ENST00000426775.1|ENSG00000235782.1|OTTHUMG00000009400.1|OTTHUMT00000026080.1|ENST00000426775|ENSG00000235782|749|	0.129753	0.0038656	0.048291
ENST00000567508.2|ENSG00000259943.2|OTTHUMG00000175805.2|OTTHUMT00000431110.2|ZMPSTE24-DT-201|ZMPSTE24-DT|1639|	0.129749	0.00386638	0.048291
ENST00000685721.2|ENSG00000289106.2|-|-|ENST00000685721|ENSG00000289106|531|	0.129731	0.00387061	0.048305
ENST00000685556.1|ENSG00000288888.1|-|-|ENST00000685556|ENSG00000288888|1045|	0.12969	0.0038796	0.0483784
ENST00000667245.1|ENSG00000281128.2|OTTHUMG00000189560.2|OTTHUMT00000523188.1|PTENP1-AS-202|PTENP1-AS|3941|	0.129623	0.00389465	0.0485271
ENST00000702617.1|ENSG00000290040.1|-|-|ENST00000702617|ENSG00000290040|509|	0.129576	0.00390524	0.04862
ENST00000606010.1|ENSG00000272249.1|OTTHUMG00000185508.1|OTTHUMT00000470620.1|ENST00000606010|ENSG00000272249|545|	0.129528	0.00391617	0.0487171
ENST00000696101.1|ENSG00000289698.1|-|-|ENST00000696101|ENSG00000289698|3061|	0.129505	0.00392136	0.0487428
ENST00000661640.1|ENSG00000286364.1|OTTHUMG00000195456.1|OTTHUMT00000526965.1|ENST00000661640|ENSG00000286364|2957|	0.129446	0.00393483	0.0488266
ENST00000606482.1|ENSG00000272416.1|OTTHUMG00000185489.1|OTTHUMT00000470597.1|ENST00000606482|ENSG00000272416|759|	0.129437	0.00393683	0.0488266
ENST00000564748.1|ENSG00000261758.1|OTTHUMG00000175808.1|OTTHUMT00000431115.1|STAG1-DT-201|STAG1-DT|3151|	0.129427	0.00393899	0.0488266
ENST00000687294.2|ENSG00000289249.2|-|-|ENST00000687294|ENSG00000289249|890|	0.12942	0.00394067	0.0488266
ENST00000688666.1|ENSG00000288810.1|-|-|ENST00000688666|ENSG00000288810|1369|	0.129352	0.00395619	0.0489799
ENST00000548687.5|ENSG00000258168.6|OTTHUMG00000169498.4|OTTHUMT00000404428.2|ENST00000548687|ENSG00000258168|5903|	0.12928	0.00397267	0.0491304
ENST00000623546.1|ENSG00000279016.1|OTTHUMG00000161454.1|OTTHUMT00000364983.1|ENST00000623546|ENSG00000279016|606|	0.129271	0.00397466	0.0491304
ENST00000552558.1|ENSG00000257947.1|OTTHUMG00000169429.1|OTTHUMT00000403976.1|ENST00000552558|ENSG00000257947|567|	0.129208	0.00398925	0.0492715
ENST00000609356.1|ENSG00000273449.1|OTTHUMG00000186411.1|OTTHUMT00000473111.1|ENST00000609356|ENSG00000273449|927|	0.129175	0.00399686	0.0492895
ENST00000509798.1|ENSG00000250341.1|OTTHUMG00000161278.1|OTTHUMT00000364351.1|LINC02510-201|LINC02510|1576|	0.129174	0.00399704	0.0492895
ENST00000501016.2|ENSG00000245970.2|OTTHUMG00000164797.1|OTTHUMT00000380347.1|RPL30-AS1-201|RPL30-AS1|1989|	0.129114	0.00401076	0.0493929
ENST00000657854.2|ENSG00000245552.9|OTTHUMG00000167830.6|OTTHUMT00000396518.2|LNCRNA-IUR-209|LNCRNA-IUR|1531|	0.12911	0.00401178	0.0493929
ENST00000664091.1|ENSG00000273415.3|OTTHUMG00000186085.8|OTTHUMT00000511140.1|LINC02725-204|LINC02725|1519|	0.12907	0.00402108	0.0494681
ENST00000670781.1|ENSG00000288076.1|OTTHUMG00000195518.1|OTTHUMT00000527324.1|ENST00000670781|ENSG00000288076|3275|	0.128963	0.00404585	0.0497335
ENST00000659311.1|ENSG00000215244.4|OTTHUMG00000186111.5|OTTHUMT00000524603.1|LINC02649-202|LINC02649|1543|	0.128918	0.00405644	0.0498244
ENST00000554042.1|ENSG00000258850.1|OTTHUMG00000170696.1|OTTHUMT00000410045.1|ENST00000554042|ENSG00000258850|854|	0.128711	0.00410508	0.0503479
ENST00000652470.1|ENSG00000223715.3|OTTHUMG00000157301.5|OTTHUMT00000498940.1|LINC01208-204|LINC01208|3331|	0.128709	0.00410554	0.0503479
ENST00000689338.1|ENSG00000289256.2|-|-|ENST00000689338|ENSG00000289256|1082|	0.128655	0.00411817	0.050463
ENST00000669093.1|ENSG00000251620.3|OTTHUMG00000161180.3|OTTHUMT00000526112.1|STPG2-AS1-203|STPG2-AS1|2465|	0.12862	0.00412643	0.0505244
ENST00000615154.1|ENSG00000276631.1|OTTHUMG00000186712.1|OTTHUMT00000473659.1|ENST00000615154|ENSG00000276631|596|	0.128491	0.00415728	0.050862
ENST00000515789.1|ENSG00000248571.1|OTTHUMG00000161462.1|OTTHUMT00000365023.1|ENST00000515789|ENSG00000248571|2371|	0.128446	0.00416793	0.0509479
ENST00000663912.1|ENSG00000236333.4|OTTHUMG00000150370.4|OTTHUMT00000526627.1|TRHDE-AS1-216|TRHDE-AS1|1709|	0.128422	0.0041737	0.0509479
ENST00000621052.1|ENSG00000274827.4|OTTHUMG00000170514.4|OTTHUMT00000409457.2|LINC01297-202|LINC01297|4222|	0.12842	0.00417412	0.0509479
ENST00000603612.1|ENSG00000270996.1|OTTHUMG00000185093.1|OTTHUMT00000469549.1|ENST00000603612|ENSG00000270996|899|	0.128366	0.00418715	0.051023
ENST00000432163.1|ENSG00000229243.2|OTTHUMG00000155652.4|OTTHUMT00000341001.1|LINC01981-201|LINC01981|2833|	0.12836	0.00418853	0.051023
ENST00000652931.1|ENSG00000287440.1|OTTHUMG00000195840.1|OTTHUMT00000529000.1|ENST00000652931|ENSG00000287440|1392|	0.128354	0.00419012	0.051023
ENST00000657635.1|ENSG00000286841.1|OTTHUMG00000195336.1|OTTHUMT00000526400.1|ENST00000657635|ENSG00000286841|909|	0.128323	0.00419761	0.0510742
ENST00000658115.1|ENSG00000287950.1|OTTHUMG00000195368.1|OTTHUMT00000526647.1|ENST00000658115|ENSG00000287950|2486|	0.128276	0.00420896	0.0511723
ENST00000377300.3|ENSG00000204754.3|OTTHUMG00000163125.1|OTTHUMT00000371773.1|LINC01951-201|LINC01951|1925|	0.128245	0.00421633	0.0512219
ENST00000670834.1|ENSG00000224903.2|OTTHUMG00000151509.2|OTTHUMT00000524183.1|RNF32-AS1-202|RNF32-AS1|3727|	0.128211	0.00422448	0.0512808
ENST00000666179.1|ENSG00000258700.6|OTTHUMG00000170871.8|OTTHUMT00000514476.1|LINC00871-208|LINC00871|947|	0.128164	0.00423609	0.0513816
ENST00000619442.1|ENSG00000275450.1|OTTHUMG00000188453.2|OTTHUMT00000478820.1|PTGER4P2-CDK2AP2P2-201|PTGER4P2-CDK2AP2P2|3123|	0.128149	0.00423954	0.0513834
ENST00000657170.1|ENSG00000287284.1|OTTHUMG00000195590.1|OTTHUMT00000527636.1|ENST00000657170|ENSG00000287284|1264|	0.128116	0.00424776	0.0514428
ENST00000650170.1|ENSG00000285928.1|OTTHUMG00000192897.1|OTTHUMT00000499516.1|ENST00000650170|ENSG00000285928|1795|	0.12809	0.00425399	0.0514782
ENST00000664518.1|ENSG00000287128.1|OTTHUMG00000194470.1|OTTHUMT00000516864.1|ENST00000664518|ENSG00000287128|1581|	0.128039	0.0042665	0.0515895
ENST00000621046.2|ENSG00000281468.1|OTTHUMG00000189755.1|OTTHUMT00000481737.1|ENST00000621046|ENSG00000281468|635|	0.127958	0.00428641	0.0517744
ENST00000610233.1|ENSG00000273367.1|OTTHUMG00000185838.1|OTTHUMT00000471467.1|ENST00000610233|ENSG00000273367|626|	0.127949	0.00428845	0.0517744
ENST00000569178.1|ENSG00000261249.1|OTTHUMG00000175573.1|OTTHUMT00000430529.1|LINC01751-201|LINC01751|1770|	0.127926	0.00429421	0.0518037
ENST00000455071.1|ENSG00000234155.1|OTTHUMG00000015137.1|OTTHUMT00000041386.1|LINC02535-201|LINC02535|2513|	0.1279	0.00430058	0.0518403
ENST00000606384.1|ENSG00000272489.1|OTTHUMG00000185655.1|OTTHUMT00000470938.1|ENST00000606384|ENSG00000272489|1595|	0.127834	0.00431693	0.0519971
ENST00000652826.1|ENSG00000287149.1|OTTHUMG00000195830.1|OTTHUMT00000528948.1|ENST00000652826|ENSG00000287149|2435|	0.127764	0.0043343	0.052166
ENST00000665427.1|ENSG00000287696.1|OTTHUMG00000194901.1|OTTHUMT00000523024.1|ENST00000665427|ENSG00000287696|977|	0.127713	0.0043469	0.0522771
ENST00000316807.2|ENSG00000180458.2|OTTHUMG00000182015.1|OTTHUMT00000458665.1|ENST00000316807|ENSG00000180458|3267|	0.127576	0.004381	0.052636
ENST00000502400.5|ENSG00000250075.7|OTTHUMG00000160726.5|OTTHUMT00000361926.2|ENST00000502400|ENSG00000250075|1991|	0.127566	0.00438351	0.052636
ENST00000651715.1|ENSG00000286113.2|OTTHUMG00000193521.1|OTTHUMT00000502809.1|ENST00000651715|ENSG00000286113|2071|	0.127499	0.00440036	0.0527976
ENST00000652113.1|ENSG00000286047.1|OTTHUMG00000192741.1|OTTHUMT00000498988.1|ENST00000652113|ENSG00000286047|689|	0.127391	0.00442759	0.0530833
ENST00000650038.1|ENSG00000224616.5|OTTHUMG00000040490.5|OTTHUMT00000498991.1|RTCA-AS1-202|RTCA-AS1|2668|	0.127348	0.00443862	0.0531746
ENST00000608204.1|ENSG00000272744.1|OTTHUMG00000186441.1|OTTHUMT00000473151.1|ENST00000608204|ENSG00000272744|634|	0.127269	0.00445858	0.0533726
ENST00000658732.1|ENSG00000287008.1|OTTHUMG00000195838.1|OTTHUMT00000528984.1|ENST00000658732|ENSG00000287008|2181|	0.127249	0.00446378	0.0533937
ENST00000671607.1|ENSG00000249203.2|OTTHUMG00000162229.2|OTTHUMT00000521312.1|LINC02224-203|LINC02224|1094|	0.127174	0.00448277	0.0535796
ENST00000664941.1|ENSG00000286347.1|OTTHUMG00000195801.1|OTTHUMT00000528859.1|ENST00000664941|ENSG00000286347|1958|	0.127043	0.00451638	0.0539399
ENST00000438573.5|ENSG00000229688.8|OTTHUMG00000152466.4|OTTHUMT00000326295.1|CRPPA-AS1-202|CRPPA-AS1|2252|	0.126981	0.00453247	0.0540905
ENST00000620372.2|ENSG00000273723.2|OTTHUMG00000187324.1|OTTHUMT00000474765.1|SUGT1-DT-201|SUGT1-DT|1033|	0.126884	0.0045575	0.0543475
ENST00000624477.1|ENSG00000278967.1|OTTHUMG00000187053.1|OTTHUMT00000474345.1|ENST00000624477|ENSG00000278967|1819|	0.12683	0.0045715	0.0544727
ENST00000669685.1|ENSG00000249343.3|OTTHUMG00000162460.17|OTTHUMT00000368994.2|LINC01333-215|LINC01333|1932|	0.126761	0.00458961	0.0546065
ENST00000668950.1|ENSG00000233251.8|OTTHUMG00000152032.3|OTTHUMT00000527571.1|ENST00000668950|ENSG00000233251|3495|	0.12676	0.00458976	0.0546065
ENST00000701116.1|ENSG00000288781.2|-|-|ENST00000701116|ENSG00000288781|1794|	0.126704	0.00460448	0.0547398
ENST00000623627.1|ENSG00000279705.1|OTTHUMG00000176728.1|OTTHUMT00000433314.1|ENST00000623627|ENSG00000279705|1551|	0.126606	0.00463029	0.0550046
ENST00000685800.1|ENSG00000288916.1|-|-|ENST00000685800|ENSG00000288916|1251|	0.126571	0.00463955	0.0550717
ENST00000662485.1|ENSG00000286447.1|OTTHUMG00000195727.1|OTTHUMT00000528466.1|ENST00000662485|ENSG00000286447|2646|	0.126558	0.00464302	0.0550717
ENST00000632484.1|ENSG00000282393.1|OTTHUMG00000187448.2|OTTHUMT00000474989.2|ENST00000632484|ENSG00000282393|3021|	0.126475	0.00466474	0.0552871
ENST00000688500.1|ENSG00000288965.1|-|-|ENST00000688500|ENSG00000288965|1510|	0.126386	0.00468863	0.0555279
ENST00000393005.6|ENSG00000290976.1|-|OTTHUMT00000131101.1|ENST00000393005|ENSG00000290976|3846|	0.126343	0.00470008	0.0555834
ENST00000611894.4|ENSG00000238129.5|OTTHUMG00000032150.2|OTTHUMT00000476105.1|ENST00000611894|ENSG00000238129|948|	0.126341	0.00470047	0.0555834
ENST00000661725.1|ENSG00000186019.12|OTTHUMG00000182335.2|OTTHUMT00000528135.1|ZNF225-AS1-203|ZNF225-AS1|5693|	0.126298	0.0047121	0.0556325
ENST00000689647.1|ENSG00000288793.1|-|-|ENST00000689647|ENSG00000288793|1487|	0.126297	0.00471238	0.0556325
ENST00000624658.1|ENSG00000279667.1|OTTHUMG00000175831.1|OTTHUMT00000431152.1|ENST00000624658|ENSG00000279667|1005|	0.126286	0.00471534	0.0556325
ENST00000418902.5|ENSG00000290530.1|-|OTTHUMT00000207323.2|ENST00000418902|ENSG00000290530|1917|	0.126258	0.00472275	0.0556598
ENST00000649220.2|ENSG00000259248.7|OTTHUMG00000172432.7|OTTHUMT00000498845.2|USP3-AS1-211|USP3-AS1|4416|	0.12625	0.00472482	0.0556598
ENST00000667627.1|ENSG00000287981.1|OTTHUMG00000195638.1|OTTHUMT00000527933.1|ENST00000667627|ENSG00000287981|2188|	0.126229	0.00473058	0.0556773
ENST00000690643.1|ENSG00000289520.1|-|-|ENST00000690643|ENSG00000289520|1192|	0.126218	0.00473346	0.0556773
ENST00000399003.1|ENSG00000214797.3|OTTHUMG00000167437.1|OTTHUMT00000394611.1|ENST00000399003|ENSG00000214797|2805|	0.126196	0.00473929	0.0557037
ENST00000607858.1|ENSG00000272420.1|OTTHUMG00000185694.1|OTTHUMT00000471013.1|ENST00000607858|ENSG00000272420|568|	0.126132	0.00475652	0.0558639
ENST00000581788.1|ENSG00000265194.1|OTTHUMG00000179356.1|OTTHUMT00000445914.1|ENST00000581788|ENSG00000265194|3017|	0.126053	0.00477786	0.0560723
ENST00000611191.1|ENSG00000273797.1|OTTHUMG00000188631.1|OTTHUMT00000477781.1|ENST00000611191|ENSG00000273797|527|	0.126006	0.00479079	0.0561816
ENST00000659121.1|ENSG00000237298.11|OTTHUMG00000133536.16|OTTHUMT00000446058.3|TTN-AS1-276|TTN-AS1|6297|	0.125972	0.00479989	0.0562459
ENST00000661177.1|ENSG00000286612.1|OTTHUMG00000194697.1|OTTHUMT00000520958.1|ENST00000661177|ENSG00000286612|1554|	0.125937	0.00480939	0.0563148
ENST00000505162.1|ENSG00000251320.1|OTTHUMG00000163419.1|OTTHUMT00000373312.1|ENST00000505162|ENSG00000251320|593|	0.125822	0.00484095	0.0566417
ENST00000449272.1|ENSG00000226296.1|OTTHUMG00000018257.1|OTTHUMT00000048119.1|ENST00000449272|ENSG00000226296|597|	0.125728	0.00486686	0.0568884
ENST00000653348.1|ENSG00000253479.6|OTTHUMG00000165095.7|OTTHUMT00000519696.1|LINC01603-203|LINC01603|1260|	0.125719	0.00486935	0.0568884
ENST00000623947.1|ENSG00000280025.1|OTTHUMG00000189180.1|OTTHUMT00000479002.1|ENST00000623947|ENSG00000280025|4254|	0.125649	0.00488849	0.0570691
ENST00000607727.1|ENSG00000271755.1|OTTHUMG00000185710.1|OTTHUMT00000471038.1|ENST00000607727|ENSG00000271755|2955|	0.12562	0.00489658	0.0571206
ENST00000586473.2|ENSG00000290593.1|-|OTTHUMT00000452877.2|ENST00000586473|ENSG00000290593|583|	0.125583	0.00490683	0.0571973
ENST00000563737.1|ENSG00000260619.1|OTTHUMG00000173021.1|OTTHUMT00000421740.1|ENST00000563737|ENSG00000260619|2455|	0.125546	0.00491711	0.0572742
ENST00000665186.1|ENSG00000286746.1|OTTHUMG00000194842.1|OTTHUMT00000522535.1|ENST00000665186|ENSG00000286746|964|	0.125507	0.00492813	0.0573596
ENST00000664622.1|ENSG00000249464.8|OTTHUMG00000161162.34|OTTHUMT00000520726.1|LINC01091-216|LINC01091|1580|	0.125472	0.00493787	0.0574299
ENST00000663801.1|ENSG00000287158.3|OTTHUMG00000195777.1|OTTHUMT00000528671.1|ENST00000663801|ENSG00000287158|3609|	0.125458	0.00494178	0.0574325
ENST00000653602.1|ENSG00000286742.1|OTTHUMG00000195022.1|OTTHUMT00000523783.1|ENST00000653602|ENSG00000286742|1207|	0.125438	0.00494743	0.0574552
ENST00000634535.1|ENSG00000282997.1|OTTHUMG00000191491.1|OTTHUMT00000488086.1|ENST00000634535|ENSG00000282997|2006|	0.125298	0.00498655	0.0578663
ENST00000580311.1|ENSG00000266803.1|OTTHUMG00000179359.1|OTTHUMT00000445925.1|ENST00000580311|ENSG00000266803|689|	0.125279	0.00499198	0.0578862
ENST00000609553.1|ENSG00000273486.1|OTTHUMG00000185980.1|OTTHUMT00000471906.1|ENST00000609553|ENSG00000273486|1684|	0.125187	0.00501787	0.058143
ENST00000480639.6|ENSG00000243069.9|OTTHUMG00000159647.7|OTTHUMT00000356689.2|ARHGEF26-AS1-203|ARHGEF26-AS1|2730|	0.125148	0.00502915	0.0582303
ENST00000443406.1|ENSG00000232458.1|OTTHUMG00000155113.2|OTTHUMT00000338450.1|LINC01450-201|LINC01450|3263|	0.125091	0.00504524	0.0583731
ENST00000658594.1|ENSG00000243818.7|OTTHUMG00000159310.23|OTTHUMT00000524936.1|ENST00000658594|ENSG00000243818|1397|	0.125065	0.00505253	0.0583935
ENST00000624853.1|ENSG00000280036.1|OTTHUMG00000172520.1|OTTHUMT00000418924.1|ENST00000624853|ENSG00000280036|1854|	0.125058	0.00505451	0.0583935
ENST00000564402.1|ENSG00000260786.1|OTTHUMG00000173426.1|OTTHUMT00000423053.1|ENST00000564402|ENSG00000260786|3258|	0.12501	0.00506842	0.0585107
ENST00000592926.1|ENSG00000267356.1|OTTHUMG00000182058.1|OTTHUMT00000459044.1|ENST00000592926|ENSG00000267356|517|	0.12497	0.00507973	0.0585978
ENST00000499624.3|ENSG00000244879.10|OTTHUMG00000172396.6|OTTHUMT00000418307.2|GABPB1-AS1-202|GABPB1-AS1|16182|	0.124905	0.0050983	0.0587683
ENST00000567359.1|ENSG00000260862.1|OTTHUMG00000176637.1|OTTHUMT00000432934.1|ENST00000567359|ENSG00000260862|4037|	0.124878	0.0051062	0.0588158
ENST00000665826.1|ENSG00000258098.2|OTTHUMG00000170437.4|OTTHUMT00000409133.2|LINC02286-202|LINC02286|917|	0.124822	0.00512225	0.0589475
ENST00000646669.1|ENSG00000284846.1|OTTHUMG00000192382.1|OTTHUMT00000493770.1|ENST00000646669|ENSG00000284846|1638|	0.124812	0.00512521	0.0589475
ENST00000655656.1|ENSG00000287299.1|OTTHUMG00000195798.1|OTTHUMT00000528799.1|ENST00000655656|ENSG00000287299|5059|	0.124797	0.00512969	0.0589555
ENST00000520820.3|ENSG00000246263.4|OTTHUMG00000164878.2|OTTHUMT00000380742.2|UBR5-DT-202|UBR5-DT|2384|	0.124774	0.00513631	0.058988
ENST00000619665.1|ENSG00000275995.1|OTTHUMG00000186981.1|OTTHUMT00000474150.1|ENST00000619665|ENSG00000275995|545|	0.124742	0.00514544	0.0590491
ENST00000649052.1|ENSG00000285633.1|OTTHUMG00000193332.1|OTTHUMT00000500721.1|ENST00000649052|ENSG00000285633|4532|	0.124667	0.00516719	0.0592249
ENST00000602345.1|ENSG00000270104.1|OTTHUMG00000183903.1|OTTHUMT00000467428.1|ENST00000602345|ENSG00000270104|574|	0.124662	0.00516863	0.0592249
ENST00000662327.1|ENSG00000287589.1|OTTHUMG00000195749.1|OTTHUMT00000528583.1|ENST00000662327|ENSG00000287589|3645|	0.12465	0.00517218	0.0592249
ENST00000671044.1|ENSG00000286593.1|OTTHUMG00000194912.1|OTTHUMT00000523075.1|ENST00000671044|ENSG00000286593|2551|	0.124636	0.00517633	0.0592288
ENST00000656848.1|ENSG00000287180.1|OTTHUMG00000195106.1|OTTHUMT00000524492.1|ENST00000656848|ENSG00000287180|1927|	0.124617	0.00518185	0.0592483
ENST00000614316.1|ENSG00000278239.1|OTTHUMG00000188263.1|OTTHUMT00000476791.1|ENST00000614316|ENSG00000278239|2265|	0.124597	0.00518769	0.0592715
ENST00000645056.1|ENSG00000237505.8|OTTHUMG00000010024.8|OTTHUMT00000496142.2|PKN2-AS1-208|PKN2-AS1|3160|	0.124563	0.0051975	0.0592988
ENST00000624952.1|ENSG00000279296.1|OTTHUMG00000177909.1|OTTHUMT00000439663.1|PRAL-201|PRAL|3286|	0.124563	0.0051977	0.0592988
ENST00000655045.1|ENSG00000226846.2|OTTHUMG00000017059.20|OTTHUMT00000514044.1|LINC00348-204|LINC00348|1210|	0.124503	0.00521517	0.0594272
ENST00000647843.1|ENSG00000285579.1|OTTHUMG00000193365.1|OTTHUMT00000500969.1|ENST00000647843|ENSG00000285579|2597|	0.124498	0.0052166	0.0594272
ENST00000602802.1|ENSG00000270039.1|OTTHUMG00000183984.1|OTTHUMT00000467678.1|ENST00000602802|ENSG00000270039|578|	0.124357	0.00525815	0.0598567
ENST00000624698.1|ENSG00000280201.1|OTTHUMG00000167621.1|OTTHUMT00000395417.1|ENST00000624698|ENSG00000280201|740|	0.124323	0.00526819	0.059897
ENST00000623225.1|ENSG00000278878.1|OTTHUMG00000189469.1|OTTHUMT00000479759.1|ENST00000623225|ENSG00000278878|897|	0.124319	0.0052694	0.059897
ENST00000649105.1|ENSG00000285809.1|OTTHUMG00000193284.1|OTTHUMT00000500652.1|ENST00000649105|ENSG00000285809|3788|	0.124296	0.00527611	0.0599296
ENST00000647660.1|ENSG00000285817.1|OTTHUMG00000192684.1|OTTHUMT00000498838.1|ENST00000647660|ENSG00000285817|1992|	0.124256	0.00528822	0.0600232
ENST00000608834.1|ENSG00000272563.1|OTTHUMG00000186041.1|OTTHUMT00000472113.1|ENST00000608834|ENSG00000272563|3443|	0.124165	0.00531505	0.0602462
ENST00000660614.2|ENSG00000287209.2|OTTHUMG00000194932.1|OTTHUMT00000523221.1|ENST00000660614|ENSG00000287209|1578|	0.124162	0.00531598	0.0602462
ENST00000569106.1|ENSG00000260022.1|OTTHUMG00000172820.1|OTTHUMT00000420699.1|ENST00000569106|ENSG00000260022|530|	0.124151	0.00531948	0.0602462
ENST00000412730.1|ENSG00000146666.5|OTTHUMG00000155644.1|OTTHUMT00000340951.1|LINC00525-201|LINC00525|1188|	0.124073	0.00534283	0.0604665
ENST00000661821.1|ENSG00000287754.1|OTTHUMG00000195066.1|OTTHUMT00000524203.1|ENST00000661821|ENSG00000287754|3571|	0.124017	0.00535941	0.0606101
ENST00000616850.1|ENSG00000278012.1|OTTHUMG00000186867.1|OTTHUMT00000473933.1|ENST00000616850|ENSG00000278012|651|	0.123998	0.00536533	0.0606329
ENST00000685045.1|ENSG00000289017.1|-|-|ENST00000685045|ENSG00000289017|1128|	0.123977	0.00537165	0.0606602
ENST00000658087.1|ENSG00000286218.2|OTTHUMG00000192761.2|OTTHUMT00000528320.1|ENST00000658087|ENSG00000286218|3609|	0.123889	0.00539802	0.0609138
ENST00000242109.5|ENSG00000122548.5|OTTHUMG00000023321.2|OTTHUMT00000328273.1|KIAA0087-201|KIAA0087|4283|	0.123873	0.00540284	0.060924
ENST00000564956.1|ENSG00000261269.1|OTTHUMG00000173465.1|OTTHUMT00000423207.1|ENST00000564956|ENSG00000261269|2485|	0.1238	0.00542516	0.0611314
ENST00000602767.2|ENSG00000270084.2|OTTHUMG00000184089.2|OTTHUMT00000468012.2|GAS5-AS1-201|GAS5-AS1|814|	0.123783	0.00543036	0.0611456
ENST00000623577.1|ENSG00000278985.1|OTTHUMG00000176490.1|OTTHUMT00000432296.1|ENST00000623577|ENSG00000278985|1776|	0.12375	0.00544032	0.0611959
ENST00000441009.1|ENSG00000226983.3|OTTHUMG00000078331.2|OTTHUMT00000171145.1|LINC01692-201|LINC01692|2719|	0.123725	0.00544795	0.0611959
ENST00000453026.7|ENSG00000223960.9|OTTHUMG00000154423.5|OTTHUMT00000335154.3|CHROMR-206|CHROMR|2366|	0.123717	0.00545046	0.0611959
ENST00000602568.1|ENSG00000270116.1|OTTHUMG00000183922.1|OTTHUMT00000467529.1|ENST00000602568|ENSG00000270116|530|	0.123717	0.00545057	0.0611959
ENST00000412134.6|ENSG00000231532.6|OTTHUMG00000151581.5|OTTHUMT00000323189.2|LINC01249-201|LINC01249|2952|	0.123653	0.00546987	0.0613683
ENST00000569070.1|ENSG00000261035.1|OTTHUMG00000175574.1|OTTHUMT00000430530.1|ENST00000569070|ENSG00000261035|2208|	0.123574	0.00549434	0.0615984
ENST00000524338.3|ENSG00000246430.9|OTTHUMG00000164412.4|OTTHUMT00000378660.1|LINC00968-207|LINC00968|2843|	0.123527	0.00550883	0.0617163
ENST00000624981.1|ENSG00000280262.1|OTTHUMG00000175894.1|OTTHUMT00000431246.1|ENST00000624981|ENSG00000280262|2929|	0.123495	0.00551867	0.0617821
ENST00000548594.6|ENSG00000257703.6|OTTHUMG00000170036.4|OTTHUMT00000406971.2|ENST00000548594|ENSG00000257703|2039|	0.123461	0.0055292	0.0618554
ENST00000518570.2|ENSG00000253194.2|OTTHUMG00000164916.3|OTTHUMT00000380900.2|ENST00000518570|ENSG00000253194|1812|	0.123441	0.00553531	0.0618792
ENST00000428160.1|ENSG00000236897.1|OTTHUMG00000066612.1|OTTHUMT00000142819.1|ENST00000428160|ENSG00000236897|869|	0.123403	0.00554714	0.061967
ENST00000455229.1|ENSG00000226599.1|OTTHUMG00000015823.1|OTTHUMT00000042690.1|ENST00000455229|ENSG00000226599|614|	0.123388	0.00555161	0.0619724
ENST00000668998.1|ENSG00000287246.1|OTTHUMG00000195085.1|OTTHUMT00000524368.1|ENST00000668998|ENSG00000287246|1756|	0.12334	0.00556652	0.0620943
ENST00000609522.1|ENSG00000272908.1|OTTHUMG00000186227.1|OTTHUMT00000472447.1|ENST00000609522|ENSG00000272908|1968|	0.123214	0.00560599	0.06247
ENST00000670992.1|ENSG00000267374.3|OTTHUMG00000178312.57|OTTHUMT00000510511.1|MIR924HG-255|MIR924HG|1665|	0.123207	0.00560824	0.06247
ENST00000623623.1|ENSG00000279083.1|OTTHUMG00000187202.1|OTTHUMT00000474572.1|ENST00000623623|ENSG00000279083|1515|	0.123155	0.00562461	0.0626075
ENST00000547326.2|ENSG00000257497.2|OTTHUMG00000169758.2|OTTHUMT00000405726.2|GLIPR1-AS1-201|GLIPR1-AS1|1482|	0.123024	0.00566563	0.063019
ENST00000612106.1|ENSG00000275569.1|OTTHUMG00000186851.2|OTTHUMT00000473904.2|ENST00000612106|ENSG00000275569|557|	0.123003	0.00567251	0.0630504
ENST00000514599.5|ENSG00000250295.6|OTTHUMG00000164493.1|OTTHUMT00000378988.1|RDH10-AS1-201|RDH10-AS1|3261|	0.122986	0.00567765	0.0630625
ENST00000605924.5|ENSG00000290490.1|-|OTTHUMT00000471097.1|ENST00000605924|ENSG00000290490|2113|	0.12291	0.00570204	0.0632882
ENST00000531002.2|ENSG00000254489.4|OTTHUMG00000166160.2|OTTHUMT00000388162.2|MPPED2-AS1-202|MPPED2-AS1|2616|	0.122841	0.00572394	0.0634859
ENST00000606008.1|ENSG00000272077.1|OTTHUMG00000185519.1|OTTHUMT00000470638.1|ENST00000606008|ENSG00000272077|1953|	0.122767	0.00574742	0.0636607
ENST00000691001.1|ENSG00000228063.4|OTTHUMG00000041228.5|-|LYPLAL1-DT-218|LYPLAL1-DT|867|	0.122766	0.00574788	0.0636607
ENST00000566763.1|ENSG00000261671.1|OTTHUMG00000176141.1|OTTHUMT00000431562.1|ENST00000566763|ENSG00000261671|763|	0.122678	0.00577597	0.0639262
ENST00000661367.1|ENSG00000224018.2|OTTHUMG00000078333.3|OTTHUMT00000508979.1|ENST00000661367|ENSG00000224018|1089|	0.122659	0.00578219	0.0639495
ENST00000647176.1|ENSG00000290770.1|-|OTTHUMT00000494217.1|MFSD14CP-209|MFSD14CP|9746|	0.122557	0.00581526	0.0642696
ENST00000661943.3|ENSG00000182165.20|OTTHUMG00000130822.10|OTTHUMT00000253374.5|TP53TG1-210|TP53TG1|3173|	0.122491	0.00583666	0.0644601
ENST00000551229.3|ENSG00000257657.3|OTTHUMG00000169469.3|OTTHUMT00000404205.3|ENST00000551229|ENSG00000257657|2557|	0.122474	0.00584192	0.0644601
ENST00000671459.1|ENSG00000225484.7|OTTHUMG00000018585.17|OTTHUMT00000522828.1|NUTM2B-AS1-222|NUTM2B-AS1|1986|	0.122463	0.00584556	0.0644601
ENST00000512464.1|ENSG00000251490.1|OTTHUMG00000160299.1|OTTHUMT00000360096.1|ENST00000512464|ENSG00000251490|699|	0.122441	0.00585291	0.0644601
ENST00000671242.1|ENSG00000286348.1|OTTHUMG00000195680.1|OTTHUMT00000528192.1|ENST00000671242|ENSG00000286348|5848|	0.12244	0.00585322	0.0644601
ENST00000445107.1|ENSG00000235483.1|OTTHUMG00000021074.1|OTTHUMT00000055632.1|GYG2-AS1-201|GYG2-AS1|515|	0.122427	0.00585749	0.0644614
ENST00000605100.2|ENSG00000290918.1|-|OTTHUMT00000468255.1|METTL21EP-202|METTL21EP|2371|	0.122358	0.00587986	0.0646118
ENST00000654745.1|ENSG00000287408.1|OTTHUMG00000195876.1|OTTHUMT00000529178.1|ENST00000654745|ENSG00000287408|3169|	0.122356	0.00588068	0.0646118
ENST00000655372.1|ENSG00000288551.1|OTTHUMG00000015748.6|OTTHUMT00000526669.1|ENST00000655372|ENSG00000288551|1109|	0.122342	0.00588504	0.0646118
ENST00000635939.1|ENSG00000290817.1|-|OTTHUMT00000362141.2|ENST00000635939|ENSG00000290817|4271|	0.122334	0.00588777	0.0646118
ENST00000649962.1|ENSG00000285778.2|OTTHUMG00000192800.2|OTTHUMT00000499178.1|ENST00000649962|ENSG00000285778|1672|	0.122291	0.00590188	0.0647209
ENST00000624058.1|ENSG00000278962.1|OTTHUMG00000176143.1|OTTHUMT00000431564.1|ENST00000624058|ENSG00000278962|2272|	0.122252	0.00591458	0.0648145
ENST00000606839.1|ENSG00000271778.1|OTTHUMG00000185565.1|OTTHUMT00000470732.1|ENST00000606839|ENSG00000271778|578|	0.122203	0.00593067	0.064945
ENST00000647894.1|ENSG00000285876.1|OTTHUMG00000192881.2|OTTHUMT00000499461.2|ENST00000647894|ENSG00000285876|2240|	0.122155	0.00594654	0.0650544
ENST00000510753.1|ENSG00000251511.1|OTTHUMG00000161776.1|OTTHUMT00000366077.1|ENST00000510753|ENSG00000251511|993|	0.122148	0.00594903	0.0650544
ENST00000610120.1|ENSG00000272770.1|OTTHUMG00000185904.1|OTTHUMT00000471671.1|ENST00000610120|ENSG00000272770|626|	0.122109	0.0059617	0.0650848
ENST00000482609.1|ENSG00000241111.1|OTTHUMG00000158788.1|OTTHUMT00000352218.1|PRICKLE2-AS1-201|PRICKLE2-AS1|6505|	0.122107	0.0059625	0.0650848
ENST00000662830.1|ENSG00000287778.2|OTTHUMG00000195191.1|OTTHUMT00000525192.1|ENST00000662830|ENSG00000287778|3714|	0.122101	0.00596436	0.0650848
ENST00000454892.2|ENSG00000290652.1|-|OTTHUMT00000336610.3|ENST00000454892|ENSG00000290652|1450|	0.122084	0.00597011	0.0651018
ENST00000565085.1|ENSG00000259871.1|OTTHUMG00000177219.1|OTTHUMT00000435882.1|ENST00000565085|ENSG00000259871|1363|	0.121976	0.00600603	0.0654477
ENST00000653093.2|ENSG00000287301.3|OTTHUMG00000195570.1|OTTHUMT00000527567.1|ENST00000653093|ENSG00000287301|1415|	0.121925	0.00602316	0.0655883
ENST00000595842.2|ENSG00000268170.2|OTTHUMG00000187176.1|OTTHUMT00000474534.1|ENST00000595842|ENSG00000268170|1800|	0.121876	0.00603942	0.0656751
ENST00000528139.1|ENSG00000255366.1|OTTHUMG00000164145.2|OTTHUMT00000384713.1|ENST00000528139|ENSG00000255366|2491|	0.121874	0.00603992	0.0656751
ENST00000685409.1|ENSG00000288924.1|-|-|ENST00000685409|ENSG00000288924|1758|	0.121842	0.00605092	0.0656751
ENST00000447529.1|ENSG00000231114.1|OTTHUMG00000155710.2|OTTHUMT00000341341.2|ENST00000447529|ENSG00000231114|1835|	0.121827	0.00605573	0.0656751
ENST00000612986.1|ENSG00000276007.1|OTTHUMG00000187001.1|OTTHUMT00000474226.1|ENST00000612986|ENSG00000276007|1090|	0.121825	0.00605644	0.0656751
ENST00000526436.1|ENSG00000255433.5|OTTHUMG00000166934.3|OTTHUMT00000391947.1|LINC02735-201|LINC02735|2691|	0.121825	0.00605647	0.0656751
ENST00000517511.1|ENSG00000253297.1|OTTHUMG00000163564.1|OTTHUMT00000374234.1|ENST00000517511|ENSG00000253297|1704|	0.121661	0.00611175	0.0662283
ENST00000656215.1|ENSG00000287550.1|OTTHUMG00000195536.1|OTTHUMT00000527445.1|ENST00000656215|ENSG00000287550|3218|	0.121646	0.00611694	0.0662384
ENST00000564121.1|ENSG00000260163.1|OTTHUMG00000176163.1|OTTHUMT00000431586.1|ENST00000564121|ENSG00000260163|4476|	0.121622	0.00612515	0.0662812
ENST00000623719.1|ENSG00000280069.1|OTTHUMG00000178994.1|OTTHUMT00000444267.1|ENST00000623719|ENSG00000280069|2094|	0.121555	0.00614775	0.0664795
ENST00000582028.2|ENSG00000264232.2|OTTHUMG00000178488.2|OTTHUMT00000442193.2|LINC01916-201|LINC01916|1269|	0.121489	0.00617023	0.0666762
ENST00000436373.1|ENSG00000233236.1|OTTHUMG00000074606.1|OTTHUMT00000158340.1|LINC02573-201|LINC02573|864|	0.121473	0.00617564	0.0666884
ENST00000668818.1|ENSG00000286946.1|OTTHUMG00000195520.1|OTTHUMT00000527337.1|ENST00000668818|ENSG00000286946|1454|	0.12137	0.00621103	0.067024
ENST00000435306.1|ENSG00000231154.1|OTTHUMG00000022108.2|OTTHUMT00000057740.1|MORF4L2-AS1-201|MORF4L2-AS1|2086|	0.121307	0.00623276	0.0670945
ENST00000665508.1|ENSG00000286544.1|OTTHUMG00000194887.1|OTTHUMT00000522894.1|ENST00000665508|ENSG00000286544|1920|	0.121306	0.00623312	0.0670945
ENST00000661416.1|ENSG00000227165.10|OTTHUMG00000019169.7|OTTHUMT00000050704.2|WDR11-DT-209|WDR11-DT|4230|	0.121299	0.00623547	0.0670945
ENST00000649670.1|ENSG00000285813.1|OTTHUMG00000193274.2|OTTHUMT00000500635.2|ENST00000649670|ENSG00000285813|3770|	0.121299	0.00623551	0.0670945
ENST00000636386.1|ENSG00000283445.1|OTTHUMG00000191617.1|OTTHUMT00000488850.1|ENST00000636386|ENSG00000283445|2708|	0.121288	0.00623936	0.0670945
ENST00000664628.1|ENSG00000287018.1|OTTHUMG00000194926.1|OTTHUMT00000523176.1|ENST00000664628|ENSG00000287018|2333|	0.121272	0.00624468	0.0670945
ENST00000609609.1|ENSG00000272842.1|OTTHUMG00000185919.1|OTTHUMT00000471713.1|ENST00000609609|ENSG00000272842|560|	0.121263	0.00624777	0.0670945
ENST00000654635.1|ENSG00000227110.7|OTTHUMG00000154968.2|OTTHUMT00000528674.1|LMCD1-AS1-208|LMCD1-AS1|4540|	0.121164	0.00628224	0.0674178
ENST00000623747.1|ENSG00000279780.1|OTTHUMG00000176515.1|OTTHUMT00000432375.1|ENST00000623747|ENSG00000279780|986|	0.12115	0.00628712	0.0674178
ENST00000662663.1|ENSG00000287738.1|OTTHUMG00000195650.1|OTTHUMT00000527965.1|ENST00000662663|ENSG00000287738|3498|	0.121125	0.00629567	0.0674178
ENST00000653057.1|ENSG00000286647.1|OTTHUMG00000195416.1|OTTHUMT00000526818.1|ENST00000653057|ENSG00000286647|4144|	0.121122	0.0062968	0.0674178
ENST00000449219.2|ENSG00000290989.1|-|OTTHUMT00000478305.1|ENST00000449219|ENSG00000290989|758|	0.121114	0.00629955	0.0674178
ENST00000575953.1|ENSG00000262514.1|OTTHUMG00000177995.1|OTTHUMT00000440182.1|ENST00000575953|ENSG00000262514|1187|	0.121099	0.00630476	0.0674216
ENST00000446838.2|ENSG00000237750.2|OTTHUMG00000153947.2|OTTHUMT00000333138.2|KCNH7-AS1-201|KCNH7-AS1|2999|	0.121076	0.00631275	0.0674216
ENST00000583416.1|ENSG00000265912.1|OTTHUMG00000179315.1|OTTHUMT00000445719.1|ENST00000583416|ENSG00000265912|2474|	0.12107	0.00631474	0.0674216
ENST00000638012.2|ENSG00000225746.13|OTTHUMG00000029060.25|OTTHUMT00000488911.2|MEG8-222|MEG8|5163|	0.121063	0.00631725	0.0674216
ENST00000624609.1|ENSG00000280423.1|OTTHUMG00000175882.1|OTTHUMT00000431233.1|ENST00000624609|ENSG00000280423|2197|	0.12105	0.00632183	0.0674242
ENST00000415193.5|ENSG00000232225.6|OTTHUMG00000017173.2|OTTHUMT00000045423.2|LINC01047-201|LINC01047|778|	0.121036	0.0063269	0.067432
ENST00000696328.1|ENSG00000289703.1|-|-|ENST00000696328|ENSG00000289703|652|	0.12092	0.00636741	0.0678173
ENST00000501397.1|ENSG00000248027.1|OTTHUMG00000167576.1|OTTHUMT00000395130.1|ARHGAP42-AS1-201|ARHGAP42-AS1|1865|	0.120875	0.00638331	0.0679401
ENST00000426870.1|ENSG00000236193.3|OTTHUMG00000186255.1|OTTHUMT00000472502.1|LINC01953-201|LINC01953|717|	0.120827	0.00640006	0.0680339
ENST00000690653.2|ENSG00000235576.3|OTTHUMG00000151591.1|OTTHUMT00000323245.1|LINC01871-203|LINC01871|1925|	0.120825	0.00640088	0.0680339
ENST00000618386.1|ENSG00000275040.1|OTTHUMG00000187010.1|OTTHUMT00000474242.1|ENST00000618386|ENSG00000275040|642|	0.120776	0.0064182	0.0681714
ENST00000650616.2|ENSG00000285780.2|OTTHUMG00000192991.3|OTTHUMT00000499809.3|ENST00000650616|ENSG00000285780|966|	0.120674	0.00645436	0.0685001
ENST00000513220.1|ENSG00000249635.1|OTTHUMG00000161211.1|OTTHUMT00000364182.1|ENST00000513220|ENSG00000249635|3526|	0.120664	0.00645795	0.0685001
ENST00000500179.1|ENSG00000245384.2|OTTHUMG00000160977.2|OTTHUMT00000363222.1|CXXC4-AS1-201|CXXC4-AS1|2968|	0.120649	0.00646315	0.0685085
ENST00000589259.1|ENSG00000266979.1|OTTHUMG00000181821.1|OTTHUMT00000457808.1|LINC01180-201|LINC01180|2025|	0.120506	0.00651447	0.0690055
ENST00000432484.6|ENSG00000272243.6|OTTHUMG00000185194.4|OTTHUMT00000041237.3|ENST00000432484|ENSG00000272243|618|	0.120479	0.00652401	0.0690595
ENST00000563865.1|ENSG00000261763.1|OTTHUMG00000175813.1|OTTHUMT00000431119.1|ENST00000563865|ENSG00000261763|3945|	0.120367	0.00656434	0.0694391
ENST00000602605.1|ENSG00000269933.1|OTTHUMG00000183932.1|OTTHUMT00000467542.1|ENST00000602605|ENSG00000269933|649|	0.120345	0.00657222	0.0694751
ENST00000625077.1|ENSG00000279834.1|OTTHUMG00000173045.1|OTTHUMT00000421919.1|ENST00000625077|ENSG00000279834|2536|	0.120305	0.00658664	0.0695803
ENST00000452716.5|ENSG00000235885.8|OTTHUMG00000152865.7|OTTHUMT00000328290.4|LINC01828-203|LINC01828|3250|	0.120259	0.00660358	0.069712
ENST00000658903.1|ENSG00000287105.1|OTTHUMG00000195647.1|OTTHUMT00000527955.1|ENST00000658903|ENSG00000287105|3342|	0.120237	0.00661135	0.0697466
ENST00000662151.1|ENSG00000286571.1|OTTHUMG00000195074.1|OTTHUMT00000524263.1|ENST00000662151|ENSG00000286571|1610|	0.1202	0.00662475	0.0698406
ENST00000687650.1|ENSG00000288815.1|-|-|ENST00000687650|ENSG00000288815|828|	0.120101	0.006661	0.0701752
ENST00000625026.1|ENSG00000278981.1|OTTHUMG00000189144.1|OTTHUMT00000478945.1|ENST00000625026|ENSG00000278981|1619|	0.120069	0.00667272	0.0702511
ENST00000702714.1|ENSG00000290059.1|-|-|ENST00000702714|ENSG00000290059|1485|	0.120045	0.00668136	0.0702944
ENST00000691300.1|ENSG00000289417.1|-|-|ENST00000691300|ENSG00000289417|1308|	0.120019	0.00669119	0.0703305
ENST00000657178.1|ENSG00000286719.1|OTTHUMG00000195684.1|OTTHUMT00000528201.1|ENST00000657178|ENSG00000286719|1750|	0.120011	0.00669383	0.0703305
ENST00000456917.2|ENSG00000234883.7|OTTHUMG00000078367.2|OTTHUMT00000171187.1|MIR155HG-201|MIR155HG|1699|	0.119927	0.00672492	0.0705735
ENST00000665046.1|ENSG00000226149.6|OTTHUMG00000015548.10|OTTHUMT00000527380.1|ENST00000665046|ENSG00000226149|2743|	0.119924	0.00672604	0.0705735
ENST00000518362.1|ENSG00000254278.1|OTTHUMG00000164972.1|OTTHUMT00000381226.1|ENST00000518362|ENSG00000254278|1408|	0.119884	0.00674091	0.0706007
ENST00000561083.1|ENSG00000259293.1|OTTHUMG00000171977.1|OTTHUMT00000416216.1|LIPC-AS1-201|LIPC-AS1|2231|	0.119882	0.00674148	0.0706007
ENST00000682224.1|ENSG00000288719.1|-|-|ENST00000682224|ENSG00000288719|4252|	0.11988	0.00674226	0.0706007
ENST00000608028.1|ENSG00000273374.1|OTTHUMG00000185856.1|OTTHUMT00000471535.1|ENST00000608028|ENSG00000273374|3360|	0.119863	0.00674842	0.0706177
ENST00000608318.2|ENSG00000290791.1|-|OTTHUMT00000498320.1|ENST00000608318|ENSG00000290791|3612|	0.119838	0.00675787	0.0706463
ENST00000686328.1|ENSG00000289389.1|-|-|ENST00000686328|ENSG00000289389|856|	0.119832	0.00676024	0.0706463
ENST00000663609.1|ENSG00000287087.1|OTTHUMG00000194797.1|OTTHUMT00000522118.1|ENST00000663609|ENSG00000287087|1233|	0.119778	0.00678018	0.0707618
ENST00000656874.1|ENSG00000286907.1|OTTHUMG00000195054.1|OTTHUMT00000524103.1|ENST00000656874|ENSG00000286907|2163|	0.119777	0.00678039	0.0707618
ENST00000651343.1|ENSG00000285998.1|OTTHUMG00000192676.1|OTTHUMT00000498808.1|ENST00000651343|ENSG00000285998|1225|	0.119634	0.00683402	0.0712438
ENST00000565617.1|ENSG00000261087.1|OTTHUMG00000173422.1|OTTHUMT00000423045.1|ZNNT1-201|ZNNT1|2825|	0.119626	0.00683688	0.0712438
ENST00000625107.1|ENSG00000175746.7|OTTHUMG00000129843.2|OTTHUMT00000252083.1|LINC02915-202|LINC02915|3078|	0.119617	0.00684032	0.0712438
ENST00000657557.1|ENSG00000287355.1|OTTHUMG00000194488.1|OTTHUMT00000517185.1|ENST00000657557|ENSG00000287355|1537|	0.119578	0.00685468	0.0713456
ENST00000487512.1|ENSG00000242385.1|OTTHUMG00000159347.2|OTTHUMT00000354826.2|LINC00901-201|LINC00901|1452|	0.119554	0.00686368	0.0713914
ENST00000673707.1|ENSG00000288585.1|OTTHUMG00000195952.1|OTTHUMT00000530160.1|ENST00000673707|ENSG00000288585|5800|	0.119424	0.00691277	0.0718276
ENST00000664648.1|ENSG00000286787.3|OTTHUMG00000186544.2|OTTHUMT00000524955.1|ENST00000664648|ENSG00000286787|2154|	0.119419	0.00691485	0.0718276
ENST00000603280.1|ENSG00000271148.1|OTTHUMG00000184920.1|OTTHUMT00000469337.1|ENST00000603280|ENSG00000271148|584|	0.119361	0.00693677	0.0720072
ENST00000664054.1|ENSG00000250954.6|OTTHUMG00000160354.4|OTTHUMT00000521787.1|ENST00000664054|ENSG00000250954|1389|	0.119301	0.00695969	0.0721969
ENST00000502457.1|ENSG00000248464.1|OTTHUMG00000162233.1|OTTHUMT00000368031.1|FGF10-AS1-201|FGF10-AS1|1894|	0.119288	0.00696453	0.0721989
ENST00000415808.1|ENSG00000290836.1|-|OTTHUMT00000280614.1|PMCHL2-209|PMCHL2|1841|	0.119231	0.00698619	0.0723752
ENST00000642173.1|ENSG00000253522.6|OTTHUMG00000163553.2|OTTHUMT00000497197.1|MIR3142HG-202|MIR3142HG|2204|	0.119212	0.00699338	0.0724016
ENST00000686975.1|ENSG00000289003.1|-|-|ENST00000686975|ENSG00000289003|1275|	0.119084	0.00704265	0.0728631
ENST00000666168.1|ENSG00000270321.2|OTTHUMG00000185191.2|OTTHUMT00000528672.1|ENST00000666168|ENSG00000270321|2338|	0.119052	0.00705472	0.0729394
ENST00000701120.1|ENSG00000289856.1|-|-|ENST00000701120|ENSG00000289856|580|	0.119036	0.00706121	0.072958
ENST00000656940.1|ENSG00000288106.1|OTTHUMG00000194281.1|OTTHUMT00000513880.1|ENST00000656940|ENSG00000288106|2919|	0.119019	0.00706765	0.0729761
ENST00000418591.1|ENSG00000236295.1|OTTHUMG00000155313.1|OTTHUMT00000339430.1|ENST00000418591|ENSG00000236295|3135|	0.118994	0.00707732	0.0730274
ENST00000551399.1|ENSG00000257741.6|OTTHUMG00000170167.11|OTTHUMT00000407759.1|LINC01490-202|LINC01490|1260|	0.118937	0.00709928	0.0732054
ENST00000558675.1|ENSG00000246863.2|OTTHUMG00000172417.1|OTTHUMT00000418454.1|GPR176-DT-202|GPR176-DT|4811|	0.118887	0.00711868	0.0733569
ENST00000512200.1|ENSG00000250508.1|OTTHUMG00000173014.1|OTTHUMT00000421713.1|LINC02701-201|LINC02701|3252|	0.11877	0.00716424	0.0737334
ENST00000600539.1|ENSG00000242539.2|OTTHUMG00000133759.4|OTTHUMT00000348852.2|ENST00000600539|ENSG00000242539|1697|	0.118769	0.00716471	0.0737334
ENST00000664243.1|ENSG00000258603.5|OTTHUMG00000171669.4|OTTHUMT00000522888.1|ENST00000664243|ENSG00000258603|2920|	0.118715	0.00718563	0.0738998
ENST00000507794.2|ENSG00000281501.1|OTTHUMG00000189520.1|OTTHUMT00000479880.1|SEPSECS-AS1-201|SEPSECS-AS1|4055|	0.1187	0.00719172	0.0739136
ENST00000662488.1|ENSG00000286516.1|OTTHUMG00000195419.1|OTTHUMT00000526823.1|ENST00000662488|ENSG00000286516|902|	0.118656	0.00720896	0.0740418
ENST00000637973.1|ENSG00000283667.1|OTTHUMG00000191685.1|OTTHUMT00000489394.1|ENST00000637973|ENSG00000283667|1609|	0.118616	0.0072247	0.0741545
ENST00000522173.1|ENSG00000248510.2|OTTHUMG00000161181.2|OTTHUMT00000381034.1|LINC02267-202|LINC02267|799|	0.118595	0.00723281	0.0741888
ENST00000419499.2|ENSG00000235532.2|OTTHUMG00000017079.1|OTTHUMT00000045273.1|LINC00402-201|LINC00402|3396|	0.118539	0.0072549	0.0743663
ENST00000661959.1|ENSG00000287643.1|OTTHUMG00000195058.1|OTTHUMT00000524152.1|ENST00000661959|ENSG00000287643|4683|	0.118473	0.00728125	0.0745395
ENST00000500682.1|ENSG00000245648.2|OTTHUMG00000168533.8|OTTHUMT00000400338.1|KLRK1-AS1-201|KLRK1-AS1|2830|	0.118472	0.00728138	0.0745395
ENST00000652941.1|ENSG00000286484.1|OTTHUMG00000195168.1|OTTHUMT00000524930.1|ENST00000652941|ENSG00000286484|1077|	0.118431	0.00729784	0.0746588
ENST00000669750.1|ENSG00000231424.3|OTTHUMG00000035508.4|OTTHUMT00000528177.1|ENST00000669750|ENSG00000231424|2208|	0.118407	0.00730717	0.0747052
ENST00000652733.1|ENSG00000236885.2|OTTHUMG00000153781.2|OTTHUMT00000500411.1|ENST00000652733|ENSG00000236885|1435|	0.118378	0.00731875	0.0747744
ENST00000563989.1|ENSG00000259775.1|OTTHUMG00000173006.1|OTTHUMT00000421672.1|EIF5-DT-201|EIF5-DT|694|	0.118329	0.00733855	0.0749274
ENST00000605249.1|ENSG00000271204.1|OTTHUMG00000185224.1|OTTHUMT00000469909.1|ENST00000605249|ENSG00000271204|1998|	0.118306	0.00734771	0.0749717
ENST00000414098.2|ENSG00000234428.2|OTTHUMG00000169229.1|OTTHUMT00000402958.1|ENST00000414098|ENSG00000234428|876|	0.118291	0.00735361	0.0749828
ENST00000399869.1|ENSG00000215246.6|OTTHUMG00000161930.2|OTTHUMT00000366445.2|LINC02982-201|LINC02982|3482|	0.118255	0.00736785	0.0750787
ENST00000429581.2|ENSG00000226717.2|OTTHUMG00000019549.2|OTTHUMT00000051722.2|PTPRD-DT-201|PTPRD-DT|2838|	0.118228	0.00737867	0.0751397
ENST00000613990.1|ENSG00000275563.1|OTTHUMG00000170341.3|OTTHUMT00000408580.3|ENST00000613990|ENSG00000275563|2086|	0.118154	0.00740852	0.0753943
ENST00000624456.1|ENSG00000280169.1|OTTHUMG00000182528.1|OTTHUMT00000462186.1|ENST00000624456|ENSG00000280169|2203|	0.118135	0.00741637	0.0754248
ENST00000693590.1|ENSG00000289276.1|-|-|ENST00000693590|ENSG00000289276|1062|	0.118085	0.0074363	0.075578
ENST00000446301.1|ENSG00000229047.1|OTTHUMG00000074325.1|OTTHUMT00000157929.1|ENST00000446301|ENSG00000229047|562|	0.118021	0.00746212	0.075791
ENST00000641065.1|ENSG00000290405.1|-|OTTHUMT00000493358.1|ENST00000641065|ENSG00000290405|1569|	0.117984	0.00747716	0.0758941
ENST00000418927.2|ENSG00000235269.2|OTTHUMG00000150105.2|OTTHUMT00000316372.2|LINC02331-201|LINC02331|2312|	0.117886	0.00751724	0.0762512
ENST00000613917.1|ENSG00000274492.1|OTTHUMG00000187066.1|OTTHUMT00000474362.1|ENST00000613917|ENSG00000274492|2544|	0.117783	0.00755939	0.0766288
ENST00000692846.1|ENSG00000288903.1|-|-|ENST00000692846|ENSG00000288903|2082|	0.117768	0.00756533	0.076639
ENST00000685856.1|ENSG00000289581.1|-|-|ENST00000685856|ENSG00000289581|1219|	0.11774	0.00757692	0.0767064
ENST00000624659.1|ENSG00000280307.1|OTTHUMG00000167260.1|OTTHUMT00000393890.1|ENST00000624659|ENSG00000280307|623|	0.117718	0.00758572	0.0767456
ENST00000609144.1|ENSG00000273180.1|OTTHUMG00000186437.1|OTTHUMT00000473148.1|ENST00000609144|ENSG00000273180|554|	0.117704	0.00759175	0.0767566
ENST00000621778.1|ENSG00000274297.1|OTTHUMG00000186947.1|OTTHUMT00000474076.1|ENST00000621778|ENSG00000274297|588|	0.117674	0.00760405	0.0768311
ENST00000502521.1|ENSG00000250608.2|OTTHUMG00000159632.12|OTTHUMT00000356585.3|NUDT16-DT-202|NUDT16-DT|1978|	0.117638	0.00761891	0.0768924
ENST00000432360.2|ENSG00000225676.2|OTTHUMG00000150912.2|OTTHUMT00000320511.2|ENST00000432360|ENSG00000225676|2210|	0.117635	0.00762001	0.0768924
ENST00000651482.1|ENSG00000245164.10|OTTHUMG00000165025.4|OTTHUMT00000504081.1|LINC00861-205|LINC00861|1448|	0.117619	0.00762654	0.0769083
ENST00000557800.1|ENSG00000259744.1|OTTHUMG00000172181.1|OTTHUMT00000417200.1|ENST00000557800|ENSG00000259744|755|	0.117559	0.00765165	0.0770864
ENST00000608358.1|ENSG00000273381.1|OTTHUMG00000186454.1|OTTHUMT00000473175.1|ENST00000608358|ENSG00000273381|4125|	0.117537	0.00766064	0.0770864
ENST00000669133.1|ENSG00000285634.3|OTTHUMG00000192857.2|OTTHUMT00000522969.1|ENST00000669133|ENSG00000285634|3652|	0.117532	0.00766258	0.0770864
ENST00000658571.1|ENSG00000287957.1|OTTHUMG00000195450.1|OTTHUMT00000526946.1|ENST00000658571|ENSG00000287957|3876|	0.117529	0.00766402	0.0770864
ENST00000607752.1|ENSG00000271917.1|OTTHUMG00000185515.1|OTTHUMT00000470634.1|ENST00000607752|ENSG00000271917|1517|	0.117443	0.00769974	0.0773955
ENST00000513770.1|ENSG00000248165.1|OTTHUMG00000160828.1|OTTHUMT00000362496.1|ENST00000513770|ENSG00000248165|590|	0.117404	0.00771615	0.0775104
ENST00000667988.1|ENSG00000286476.1|OTTHUMG00000194634.1|OTTHUMT00000520199.1|ENST00000667988|ENSG00000286476|748|	0.117322	0.00775035	0.0778037
ENST00000568324.1|ENSG00000261129.1|OTTHUMG00000176043.1|OTTHUMT00000431416.1|ENST00000568324|ENSG00000261129|3102|	0.117281	0.00776765	0.077927
ENST00000621924.4|ENSG00000275496.4|OTTHUMG00000189367.2|OTTHUMT00000479469.1|ENST00000621924|ENSG00000275496|2380|	0.117127	0.00783232	0.0785025
ENST00000430983.6|ENSG00000291140.1|-|OTTHUMT00000255102.1|AMZ2P1-203|AMZ2P1|3430|	0.117121	0.0078351	0.0785025
ENST00000416437.1|ENSG00000232474.1|OTTHUMG00000153666.1|OTTHUMT00000331997.1|NCKAP5-IT1-201|NCKAP5-IT1|554|	0.117092	0.00784725	0.0785736
ENST00000602954.1|ENSG00000269906.1|OTTHUMG00000183927.1|OTTHUMT00000467537.1|ENST00000602954|ENSG00000269906|668|	0.11703	0.00787347	0.0787853
ENST00000435944.5|ENSG00000177640.16|OTTHUMG00000019127.9|OTTHUMT00000050577.5|CASC2-203|CASC2|3270|	0.11691	0.00792489	0.0792489
ENST00000702166.1|ENSG00000289967.1|-|-|ENST00000702166|ENSG00000289967|1102|	0.116844	0.00795279	0.0794767
ENST00000624511.1|ENSG00000279205.1|OTTHUMG00000176289.1|OTTHUMT00000431725.1|ENST00000624511|ENSG00000279205|1624|	0.116825	0.00796127	0.0795104
ENST00000655888.1|ENSG00000288584.1|OTTHUMG00000015979.14|OTTHUMT00000527574.1|ENST00000655888|ENSG00000288584|2595|	0.116776	0.00798239	0.0796702
ENST00000641612.1|ENSG00000290703.1|-|OTTHUMT00000493576.1|ENST00000641612|ENSG00000290703|1325|	0.116706	0.00801235	0.0799179
ENST00000358582.9|ENSG00000290988.1|-|OTTHUMT00000459496.3|ZNF781-202|ZNF781|3140|	0.116575	0.00806893	0.0804016
ENST00000416509.1|ENSG00000224844.1|OTTHUMG00000153018.1|OTTHUMT00000329029.1|ENST00000416509|ENSG00000224844|669|	0.11657	0.00807118	0.0804016
ENST00000623345.1|ENSG00000279368.1|OTTHUMG00000175895.1|OTTHUMT00000431247.1|ENST00000623345|ENSG00000279368|1837|	0.116503	0.00810051	0.0806421
ENST00000656790.1|ENSG00000287927.1|OTTHUMG00000195610.1|OTTHUMT00000527764.1|ENST00000656790|ENSG00000287927|2070|	0.116474	0.00811332	0.080718
ENST00000567886.1|ENSG00000260322.1|OTTHUMG00000175855.1|OTTHUMT00000431185.1|ENST00000567886|ENSG00000260322|1976|	0.116451	0.00812311	0.0807636
ENST00000453121.1|ENSG00000228853.1|OTTHUMG00000009732.1|OTTHUMT00000026852.1|NEGR1-IT1-201|NEGR1-IT1|534|	0.116394	0.00814793	0.0809586
ENST00000663587.1|ENSG00000248872.2|OTTHUMG00000160875.8|OTTHUMT00000362757.2|LINC02431-206|LINC02431|1826|	0.11638	0.0081544	0.0809713
ENST00000602585.2|ENSG00000270127.2|OTTHUMG00000177241.2|OTTHUMT00000435966.2|ENST00000602585|ENSG00000270127|2389|	0.116261	0.00820649	0.0814153
ENST00000454152.1|ENSG00000224382.2|OTTHUMG00000017573.2|OTTHUMT00000046508.1|LINC00703-202|LINC00703|2390|	0.116254	0.00820959	0.0814153
ENST00000702412.1|ENSG00000287124.2|OTTHUMG00000194767.1|-|ENST00000702412|ENSG00000287124|1262|	0.116218	0.00822566	0.0814239
ENST00000669513.1|ENSG00000257948.2|OTTHUMG00000170013.4|OTTHUMT00000510278.1|ENST00000669513|ENSG00000257948|971|	0.116215	0.00822682	0.0814239
ENST00000355909.7|ENSG00000197176.7|OTTHUMG00000171466.3|OTTHUMT00000413543.2|LINC02291-201|LINC02291|1670|	0.116211	0.00822886	0.0814239
ENST00000652546.1|ENSG00000286124.1|OTTHUMG00000192775.1|OTTHUMT00000499090.1|ENST00000652546|ENSG00000286124|1049|	0.116202	0.00823254	0.0814239
ENST00000668002.1|ENSG00000286363.1|OTTHUMG00000195860.1|OTTHUMT00000529081.1|ENST00000668002|ENSG00000286363|1001|	0.116193	0.00823664	0.0814239
ENST00000671258.1|ENSG00000287811.3|OTTHUMG00000194528.1|OTTHUMT00000517990.1|ENST00000671258|ENSG00000287811|1422|	0.116177	0.00824352	0.0814253
ENST00000607744.1|ENSG00000271993.1|OTTHUMG00000185491.1|OTTHUMT00000470599.1|ENST00000607744|ENSG00000271993|628|	0.116169	0.00824725	0.0814253
ENST00000509367.2|ENSG00000249797.2|OTTHUMG00000162888.6|OTTHUMT00000370950.2|LINC02147-201|LINC02147|1317|	0.116147	0.00825711	0.0814708
ENST00000587012.1|ENSG00000267745.1|OTTHUMG00000179887.1|OTTHUMT00000448826.1|ENST00000587012|ENSG00000267745|1212|	0.116082	0.00828592	0.0816657
ENST00000417843.2|ENSG00000225411.3|OTTHUMG00000058662.3|OTTHUMT00000129817.2|ENST00000417843|ENSG00000225411|2878|	0.116079	0.00828736	0.0816657
ENST00000567415.1|ENSG00000261229.6|OTTHUMG00000176724.1|OTTHUMT00000433308.1|ENST00000567415|ENSG00000261229|758|	0.115978	0.00833215	0.0819879
ENST00000647661.1|ENSG00000233397.3|OTTHUMG00000153861.3|OTTHUMT00000500588.1|ENST00000647661|ENSG00000233397|909|	0.115978	0.00833244	0.0819879
ENST00000510655.1|ENSG00000249532.6|OTTHUMG00000161565.1|OTTHUMT00000365317.1|MIR302CHG-203|MIR302CHG|640|	0.115954	0.00834313	0.0819879
ENST00000650579.1|ENSG00000205293.5|OTTHUMG00000164281.3|OTTHUMT00000499073.1|LINC01602-202|LINC01602|2296|	0.115952	0.00834408	0.0819879
ENST00000457162.2|ENSG00000231125.2|OTTHUMG00000078807.2|OTTHUMT00000171870.2|ENST00000457162|ENSG00000231125|794|	0.115946	0.00834642	0.0819879
ENST00000641352.1|ENSG00000284618.1|OTTHUMG00000192346.2|OTTHUMT00000493631.2|ENST00000641352|ENSG00000284618|4068|	0.115916	0.00836002	0.0820696
ENST00000624261.1|ENSG00000279094.3|OTTHUMG00000189365.2|OTTHUMT00000479452.1|LINC01670-202|LINC01670|936|	0.115877	0.00837754	0.08212
ENST00000669855.1|ENSG00000288011.1|OTTHUMG00000194809.1|OTTHUMT00000522262.1|ENST00000669855|ENSG00000288011|2623|	0.115851	0.00838939	0.08212
ENST00000668932.1|ENSG00000229385.2|OTTHUMG00000152910.2|OTTHUMT00000527630.1|CTNNA2-AS1-203|CTNNA2-AS1|1885|	0.115847	0.00839125	0.08212
ENST00000521074.1|ENSG00000235931.2|OTTHUMG00000018285.2|OTTHUMT00000379562.1|LINC01553-203|LINC01553|4329|	0.115838	0.00839493	0.08212
ENST00000666810.1|ENSG00000253177.2|OTTHUMG00000164158.5|OTTHUMT00000520842.1|ENST00000666810|ENSG00000253177|1821|	0.115837	0.00839566	0.08212
ENST00000562262.1|ENSG00000260599.1|OTTHUMG00000175727.1|OTTHUMT00000430906.1|ENST00000562262|ENSG00000260599|3355|	0.115834	0.00839683	0.08212
ENST00000686574.1|ENSG00000289574.1|-|-|ENST00000686574|ENSG00000289574|1580|	0.115687	0.00846331	0.0827181
ENST00000690782.1|ENSG00000289314.1|-|-|ENST00000690782|ENSG00000289314|1299|	0.115657	0.00847717	0.0828015
ENST00000658390.1|ENSG00000286944.1|OTTHUMG00000195011.1|OTTHUMT00000523726.1|ENST00000658390|ENSG00000286944|3583|	0.115635	0.00848708	0.0828462
ENST00000693369.1|ENSG00000289208.1|-|-|ENST00000693369|ENSG00000289208|1710|	0.115612	0.00849741	0.0828951
ENST00000655075.1|ENSG00000288029.1|OTTHUMG00000195857.1|OTTHUMT00000529075.1|ENST00000655075|ENSG00000288029|3934|	0.115582	0.008511	0.082928
ENST00000667385.1|ENSG00000287931.1|OTTHUMG00000195044.1|OTTHUMT00000523948.1|ENST00000667385|ENSG00000287931|1277|	0.115581	0.00851146	0.082928
ENST00000654655.1|ENSG00000232044.8|OTTHUMG00000151462.19|OTTHUMT00000528701.1|SILC1-209|SILC1|3614|	0.115553	0.00852429	0.0830011
ENST00000662947.1|ENSG00000226519.4|OTTHUMG00000016828.6|OTTHUMT00000522649.1|LINC00390-205|LINC00390|2579|	0.115493	0.00855181	0.0832006
ENST00000606988.1|ENSG00000272516.1|OTTHUMG00000185317.1|OTTHUMT00000470158.1|ENST00000606988|ENSG00000272516|584|	0.115485	0.00855548	0.0832006
ENST00000602443.1|ENSG00000270076.1|OTTHUMG00000183970.1|OTTHUMT00000467637.1|ENST00000602443|ENSG00000270076|707|	0.115425	0.00858291	0.0834151
ENST00000668325.1|ENSG00000288523.1|OTTHUMG00000168421.3|OTTHUMT00000525654.1|ENST00000668325|ENSG00000288523|2951|	0.115387	0.00860045	0.0835241
ENST00000691241.1|ENSG00000289624.1|-|-|ENST00000691241|ENSG00000289624|1189|	0.115377	0.00860486	0.0835241
ENST00000641168.1|ENSG00000290745.1|-|OTTHUMT00000493364.1|ENST00000641168|ENSG00000290745|1176|	0.115339	0.00862243	0.0836424
ENST00000434296.2|ENSG00000227502.4|OTTHUMG00000015405.4|OTTHUMT00000041902.3|MROCKI-201|MROCKI|2755|	0.115326	0.00862833	0.0836474
ENST00000412629.6|ENSG00000226258.7|OTTHUMG00000154912.7|OTTHUMT00000337646.2|GRM7-AS3-201|GRM7-AS3|1316|	0.115257	0.00866048	0.0838647
ENST00000460977.1|ENSG00000244327.1|OTTHUMG00000159252.1|OTTHUMT00000354098.1|ENST00000460977|ENSG00000244327|765|	0.115254	0.00866152	0.0838647
ENST00000562917.1|ENSG00000261670.1|OTTHUMG00000173365.2|OTTHUMT00000422903.1|ENST00000562917|ENSG00000261670|4597|	0.115198	0.00868758	0.0840646
ENST00000642024.1|ENSG00000245662.4|OTTHUMG00000161960.3|OTTHUMT00000493656.1|LINC02211-204|LINC02211|1070|	0.115167	0.00870212	0.0841529
ENST00000582080.1|ENSG00000263938.1|OTTHUMG00000179249.1|OTTHUMT00000445459.1|ENST00000582080|ENSG00000263938|776|	0.11512	0.0087241	0.0843131
ENST00000609071.1|ENSG00000272777.1|OTTHUMG00000186323.1|OTTHUMT00000472889.1|ENST00000609071|ENSG00000272777|870|	0.115105	0.00873076	0.0843251
ENST00000566476.2|ENSG00000260976.2|OTTHUMG00000176171.2|OTTHUMT00000431594.2|LINC01633-201|LINC01633|1423|	0.114971	0.00879361	0.0848793
ENST00000513540.1|ENSG00000272304.1|OTTHUMG00000160711.1|OTTHUMT00000361860.1|ENST00000513540|ENSG00000272304|552|	0.114871	0.00884087	0.0852826
ENST00000457577.7|ENSG00000232732.11|OTTHUMG00000154483.12|OTTHUMT00000335452.5|ENST00000457577|ENSG00000232732|740|	0.114819	0.00886541	0.0854663
ENST00000506032.1|ENSG00000251033.1|OTTHUMG00000161970.1|OTTHUMT00000366541.1|ENST00000506032|ENSG00000251033|685|	0.11472	0.00891226	0.0858647
ENST00000667590.2|ENSG00000231811.4|OTTHUMG00000014165.6|OTTHUMT00000527696.1|ENST00000667590|ENSG00000231811|3695|	0.114595	0.00897189	0.0863856
ENST00000496220.1|ENSG00000241098.1|OTTHUMG00000158294.1|OTTHUMT00000350597.1|LINC01994-201|LINC01994|1808|	0.114528	0.00900356	0.0865613
ENST00000602461.1|ENSG00000270069.3|OTTHUMG00000184015.3|OTTHUMT00000467990.2|MIR222HG-201|MIR222HG|1379|	0.114518	0.0090086	0.0865613
ENST00000670393.1|ENSG00000286721.1|OTTHUMG00000195580.1|OTTHUMT00000527597.1|ENST00000670393|ENSG00000286721|2231|	0.114511	0.00901192	0.0865613
ENST00000652795.1|ENSG00000283405.2|OTTHUMG00000191714.2|OTTHUMT00000525017.1|ENST00000652795|ENSG00000283405|2587|	0.11451	0.0090124	0.0865613
ENST00000508823.1|ENSG00000250716.1|OTTHUMG00000161633.1|OTTHUMT00000365547.1|LINC01017-201|LINC01017|768|	0.114487	0.00902327	0.0866122
ENST00000686653.1|ENSG00000289419.1|-|-|ENST00000686653|ENSG00000289419|1857|	0.114444	0.00904421	0.086627
ENST00000650204.1|ENSG00000285725.1|OTTHUMG00000193353.1|OTTHUMT00000500898.1|ENST00000650204|ENSG00000285725|1910|	0.11444	0.00904602	0.086627
ENST00000654325.1|ENSG00000233554.6|OTTHUMG00000019763.4|OTTHUMT00000052037.2|B4GALT1-AS1-203|B4GALT1-AS1|3752|	0.11444	0.00904614	0.086627
ENST00000652118.1|ENSG00000286191.1|OTTHUMG00000193499.1|OTTHUMT00000502347.1|ENST00000652118|ENSG00000286191|2165|	0.114427	0.00905245	0.086627
ENST00000607135.1|ENSG00000272112.1|OTTHUMG00000185606.1|OTTHUMT00000470828.1|ENST00000607135|ENSG00000272112|526|	0.114426	0.00905266	0.086627
ENST00000625074.1|ENSG00000279682.1|OTTHUMG00000175445.1|OTTHUMT00000429991.1|ENST00000625074|ENSG00000279682|1541|	0.114377	0.0090764	0.0868008
ENST00000690734.1|ENSG00000235100.6|OTTHUMG00000184077.2|-|ENST00000690734|ENSG00000235100|1873|	0.114328	0.00910003	0.0869733
ENST00000505002.1|ENSG00000248876.1|OTTHUMG00000163114.1|OTTHUMT00000371718.1|ENST00000505002|ENSG00000248876|744|	0.114258	0.00913376	0.087242
ENST00000686372.2|ENSG00000288937.2|-|-|ENST00000686372|ENSG00000288937|1104|	0.114244	0.00914097	0.0872567
ENST00000472838.1|ENSG00000241345.1|OTTHUMG00000157317.1|OTTHUMT00000348429.1|ENST00000472838|ENSG00000241345|1754|	0.114232	0.00914653	0.0872567
ENST00000415305.6|ENSG00000228021.7|OTTHUMG00000019230.5|OTTHUMT00000050916.3|ENST00000415305|ENSG00000228021|3149|	0.114172	0.0091758	0.0874824
ENST00000636095.1|ENSG00000283692.2|OTTHUMG00000191795.2|OTTHUMT00000490105.1|ENST00000636095|ENSG00000283692|1835|	0.113985	0.00926738	0.0883013
ENST00000499625.1|ENSG00000246225.7|OTTHUMG00000166073.3|OTTHUMT00000388547.1|ENST00000499625|ENSG00000246225|2029|	0.113851	0.00933364	0.0888782
ENST00000625000.1|ENSG00000279743.1|OTTHUMG00000177545.1|OTTHUMT00000437487.1|ENST00000625000|ENSG00000279743|2138|	0.113831	0.00934349	0.0889176
ENST00000468961.2|ENSG00000240549.2|OTTHUMG00000158760.2|OTTHUMT00000352066.2|THOC7-AS1-201|THOC7-AS1|673|	0.113812	0.00935282	0.0889519
ENST00000608373.1|ENSG00000273203.1|OTTHUMG00000186095.1|OTTHUMT00000472245.1|ENST00000608373|ENSG00000273203|2855|	0.113788	0.00936457	0.0889722
ENST00000418574.3|ENSG00000255871.2|OTTHUMG00000168856.2|OTTHUMT00000401401.2|ENST00000418574|ENSG00000255871|2178|	0.113785	0.00936639	0.0889722
ENST00000662507.1|ENSG00000286782.1|OTTHUMG00000194651.1|OTTHUMT00000520359.1|ENST00000662507|ENSG00000286782|1999|	0.113756	0.00938042	0.0890267
ENST00000503244.2|ENSG00000251423.3|OTTHUMG00000161749.3|OTTHUMT00000365987.3|ENST00000503244|ENSG00000251423|3912|	0.11375	0.00938358	0.0890267
ENST00000647189.1|ENSG00000231426.7|OTTHUMG00000015697.3|OTTHUMT00000497155.1|FILNC1-206|FILNC1|1502|	0.113687	0.00941479	0.0892683
ENST00000444442.1|ENSG00000233821.1|OTTHUMG00000016819.1|OTTHUMT00000044719.1|ENOX1-AS1-201|ENOX1-AS1|3907|	0.113673	0.0094217	0.0892794
ENST00000623520.1|ENSG00000280166.1|OTTHUMG00000184253.1|OTTHUMT00000468499.1|ENST00000623520|ENSG00000280166|619|	0.113552	0.00948223	0.0897982
ENST00000610421.1|ENSG00000275191.1|OTTHUMG00000186930.1|OTTHUMT00000474039.1|ENST00000610421|ENSG00000275191|561|	0.113501	0.00950825	0.0899898
ENST00000436383.2|ENSG00000238266.3|OTTHUMG00000193424.1|OTTHUMT00000046670.2|LINC00707-201|LINC00707|3098|	0.113458	0.00952953	0.0901363
ENST00000552780.1|ENSG00000257410.1|OTTHUMG00000169573.1|OTTHUMT00000404860.1|ENST00000552780|ENSG00000257410|1431|	0.113429	0.00954458	0.0902238
ENST00000625085.1|ENSG00000278875.1|OTTHUMG00000175760.1|OTTHUMT00000431039.1|ENST00000625085|ENSG00000278875|1802|	0.113349	0.0095849	0.0905106
ENST00000624476.1|ENSG00000279856.1|OTTHUMG00000176663.1|OTTHUMT00000433025.1|ENST00000624476|ENSG00000279856|1038|	0.113346	0.00958656	0.0905106
ENST00000665793.1|ENSG00000287007.1|OTTHUMG00000194847.1|OTTHUMT00000522580.1|ENST00000665793|ENSG00000287007|3623|	0.113279	0.00962013	0.0907725
ENST00000612592.1|ENSG00000275119.1|OTTHUMG00000169115.2|OTTHUMT00000402306.2|ENST00000612592|ENSG00000275119|512|	0.113147	0.00968759	0.0913535
ENST00000509655.2|ENSG00000251405.3|OTTHUMG00000163480.3|OTTHUMT00000373684.1|NIPAL4-DT-201|NIPAL4-DT|1992|	0.113068	0.00972808	0.0916681
ENST00000664990.1|ENSG00000287827.1|OTTHUMG00000195206.1|OTTHUMT00000525302.1|ENST00000664990|ENSG00000287827|912|	0.113058	0.00973315	0.0916681
ENST00000657831.1|ENSG00000287439.1|OTTHUMG00000195868.1|OTTHUMT00000529140.1|ENST00000657831|ENSG00000287439|4022|	0.113048	0.00973863	0.0916681
ENST00000662998.1|ENSG00000286694.1|OTTHUMG00000194835.1|OTTHUMT00000522517.1|ENST00000662998|ENSG00000286694|1965|	0.113007	0.00975956	0.0918096
ENST00000561121.1|ENSG00000259478.2|OTTHUMG00000172045.1|OTTHUMT00000416597.1|ENST00000561121|ENSG00000259478|1963|	0.112959	0.00978418	0.091949
ENST00000653062.1|ENSG00000229941.6|OTTHUMG00000154189.3|OTTHUMT00000528886.1|PDE11A-AS1-203|PDE11A-AS1|1506|	0.112955	0.00978621	0.091949
ENST00000618896.1|ENSG00000274331.1|OTTHUMG00000187260.1|OTTHUMT00000474657.1|ENST00000618896|ENSG00000274331|1708|	0.112908	0.00981048	0.0921213
ENST00000623235.1|ENSG00000279490.1|OTTHUMG00000176102.1|OTTHUMT00000431507.1|ENST00000623235|ENSG00000279490|2755|	0.112694	0.00992209	0.0931132
ENST00000609389.5|ENSG00000272568.6|OTTHUMG00000186196.2|OTTHUMT00000472401.1|CPVL-AS2-202|CPVL-AS2|3695|	0.11267	0.00993452	0.0931736
ENST00000608733.1|ENSG00000273447.1|OTTHUMG00000186339.1|OTTHUMT00000472968.1|ENST00000608733|ENSG00000273447|700|	0.112654	0.00994306	0.0931975
ENST00000668104.1|ENSG00000229621.2|OTTHUMG00000151807.4|OTTHUMT00000521474.1|LINC01822-204|LINC01822|2049|	0.112621	0.00996009	0.0932725
ENST00000443018.3|ENSG00000232721.3|OTTHUMG00000041573.2|OTTHUMT00000099556.2|ENST00000443018|ENSG00000232721|2743|	0.112615	0.00996306	0.0932725
ENST00000625121.2|ENSG00000279048.2|OTTHUMG00000173367.1|OTTHUMT00000422905.1|ENST00000625121|ENSG00000279048|2424|	0.112575	0.00998451	0.093417
ENST00000663119.1|ENSG00000227455.3|OTTHUMG00000015982.4|OTTHUMT00000043023.3|ENST00000663119|ENSG00000227455|1877|	0.112505	0.0100209	0.0937015
ENST00000493033.1|ENSG00000241490.1|OTTHUMG00000159333.1|OTTHUMT00000354698.1|ENST00000493033|ENSG00000241490|3023|	0.11245	0.0100503	0.0939194
ENST00000659670.1|ENSG00000260785.2|OTTHUMG00000176079.15|OTTHUMT00000514772.1|CASC17-203|CASC17|2096|	0.112408	0.0100724	0.0940697
ENST00000608943.1|ENSG00000273368.1|OTTHUMG00000186214.1|OTTHUMT00000472427.1|ENST00000608943|ENSG00000273368|513|	0.112383	0.0100858	0.0940914
ENST00000651788.1|ENSG00000286163.1|OTTHUMG00000193086.1|OTTHUMT00000500102.1|ENST00000651788|ENSG00000286163|1052|	0.112381	0.0100868	0.0940914
ENST00000658140.1|ENSG00000235160.3|OTTHUMG00000056666.5|OTTHUMT00000505916.1|LINC02248-203|LINC02248|1893|	0.112254	0.0101542	0.0946629
ENST00000702736.1|ENSG00000289408.2|-|-|ENST00000702736|ENSG00000289408|983|	0.112242	0.0101606	0.0946661
ENST00000592638.1|ENSG00000267414.1|OTTHUMG00000176180.1|OTTHUMT00000431603.1|SETBP1-DT-201|SETBP1-DT|2065|	0.112213	0.0101758	0.0946666
ENST00000624834.1|ENSG00000279606.1|OTTHUMG00000178120.1|OTTHUMT00000440599.1|ENST00000624834|ENSG00000279606|2506|	0.11221	0.0101776	0.0946666
ENST00000662357.1|ENSG00000285838.2|OTTHUMG00000192720.4|OTTHUMT00000512423.1|ENST00000662357|ENSG00000285838|1360|	0.112208	0.0101789	0.0946666
ENST00000657563.1|ENSG00000286577.1|OTTHUMG00000194711.1|OTTHUMT00000521110.1|ENST00000657563|ENSG00000286577|1492|	0.112162	0.0102033	0.0948364
ENST00000668622.1|ENSG00000286798.1|OTTHUMG00000195218.1|OTTHUMT00000525380.1|ENST00000668622|ENSG00000286798|992|	0.112102	0.0102354	0.0950776
ENST00000660873.1|ENSG00000269293.5|OTTHUMG00000184041.5|OTTHUMT00000509171.1|ZSCAN16-AS1-203|ZSCAN16-AS1|1646|	0.112073	0.0102513	0.0950919
ENST00000656603.1|ENSG00000286685.3|OTTHUMG00000194923.1|OTTHUMT00000523170.1|ENST00000656603|ENSG00000286685|2238|	0.112065	0.0102557	0.0950919
ENST00000531379.1|ENSG00000255321.1|OTTHUMG00000165328.1|OTTHUMT00000383463.1|ENST00000531379|ENSG00000255321|689|	0.112061	0.0102574	0.0950919
ENST00000688913.1|ENSG00000288910.1|-|-|ENST00000688913|ENSG00000288910|956|	0.112054	0.0102614	0.0950919
ENST00000667782.1|ENSG00000227088.2|OTTHUMG00000152843.2|OTTHUMT00000503643.1|ENST00000667782|ENSG00000227088|1159|	0.112029	0.0102746	0.0951579
ENST00000655907.1|ENSG00000288056.1|OTTHUMG00000194916.1|OTTHUMT00000523115.1|ENST00000655907|ENSG00000288056|1737|	0.112	0.0102905	0.095216
ENST00000651728.2|ENSG00000286136.2|OTTHUMG00000192921.2|OTTHUMT00000499591.2|ENST00000651728|ENSG00000286136|1310|	0.111995	0.0102931	0.095216
ENST00000581652.1|ENSG00000290858.1|-|OTTHUMT00000444575.1|ENST00000581652|ENSG00000290858|565|	0.111978	0.0103024	0.095245
ENST00000649541.1|ENSG00000213468.7|OTTHUMG00000022417.16|OTTHUMT00000501594.1|FIRRE-206|FIRRE|5506|	0.111929	0.010329	0.0954201
ENST00000640362.1|ENSG00000284240.1|OTTHUMG00000191927.2|OTTHUMT00000491423.1|LINC02801-201|LINC02801|3864|	0.11192	0.0103336	0.0954201
ENST00000658928.1|ENSG00000285681.2|OTTHUMG00000192983.2|OTTHUMT00000523422.1|ENST00000658928|ENSG00000285681|2116|	0.111888	0.0103512	0.0955263
ENST00000691797.1|ENSG00000289449.1|-|-|ENST00000691797|ENSG00000289449|625|	0.11187	0.0103608	0.0955428
ENST00000686474.2|ENSG00000245910.9|OTTHUMG00000164743.4|OTTHUMT00000380021.1|SNHG6-206|SNHG6|1821|	0.111862	0.0103653	0.0955428
ENST00000624004.1|ENSG00000279311.1|OTTHUMG00000175840.1|OTTHUMT00000431165.1|ENST00000624004|ENSG00000279311|1924|	0.111831	0.0103821	0.0956408
ENST00000702477.1|ENSG00000287958.2|OTTHUMG00000195648.1|-|ENST00000702477|ENSG00000287958|1365|	0.111812	0.0103923	0.0956781
ENST00000511291.1|ENSG00000251216.2|OTTHUMG00000160738.5|OTTHUMT00000362024.1|ENST00000511291|ENSG00000251216|1824|	0.111777	0.0104115	0.0957853
ENST00000455963.6|ENSG00000234336.7|OTTHUMG00000152771.3|OTTHUMT00000327759.2|JAZF1-AS1-203|JAZF1-AS1|3748|	0.111762	0.0104199	0.0957853
ENST00000667856.1|ENSG00000243701.8|OTTHUMG00000159173.27|OTTHUMT00000528830.1|DUBR-229|DUBR|3184|	0.111754	0.0104243	0.0957853
ENST00000660197.1|ENSG00000280241.4|OTTHUMG00000189143.2|OTTHUMT00000527289.1|ENST00000660197|ENSG00000280241|2660|	0.111745	0.0104289	0.0957853
ENST00000692021.1|ENSG00000289079.1|-|-|ENST00000692021|ENSG00000289079|1423|	0.111734	0.0104348	0.0957853
ENST00000667616.1|ENSG00000236340.6|OTTHUMG00000063970.3|OTTHUMT00000517077.1|GRM8-AS1-203|GRM8-AS1|1682|	0.111697	0.0104552	0.0959161
ENST00000435311.1|ENSG00000231987.1|OTTHUMG00000010690.2|OTTHUMT00000029470.2|LINC01787-201|LINC01787|1994|	0.111605	0.0105057	0.0962729
ENST00000596330.1|ENSG00000269271.1|OTTHUMG00000183032.2|OTTHUMT00000464702.2|ENST00000596330|ENSG00000269271|847|	0.111598	0.0105096	0.0962729
ENST00000666024.1|ENSG00000287567.1|OTTHUMG00000195656.1|OTTHUMT00000528086.1|ENST00000666024|ENSG00000287567|1012|	0.111592	0.0105126	0.0962729
ENST00000644706.1|ENSG00000285498.1|OTTHUMG00000192516.1|OTTHUMT00000494983.1|ENST00000644706|ENSG00000285498|1153|	0.111548	0.0105371	0.0964189
ENST00000660385.1|ENSG00000288066.1|OTTHUMG00000195803.1|OTTHUMT00000528866.1|ENST00000660385|ENSG00000288066|1912|	0.111541	0.010541	0.0964189
ENST00000624275.1|ENSG00000280078.1|OTTHUMG00000172976.1|OTTHUMT00000421578.1|ENST00000624275|ENSG00000280078|3931|	0.111511	0.0105574	0.0965121
ENST00000575094.5|ENSG00000291107.1|-|OTTHUMT00000439145.1|ENST00000575094|ENSG00000291107|2612|	0.11147	0.0105802	0.0966642
ENST00000669243.1|ENSG00000286415.1|OTTHUMG00000195658.1|OTTHUMT00000528091.1|ENST00000669243|ENSG00000286415|1812|	0.111445	0.0105938	0.0967143
ENST00000683051.1|ENSG00000228956.9|OTTHUMG00000155346.8|-|SATB1-AS1-273|SATB1-AS1|3394|	0.111429	0.010603	0.0967143
ENST00000420187.1|ENSG00000233128.2|OTTHUMG00000152401.2|OTTHUMT00000326080.1|LINC01794-201|LINC01794|549|	0.111426	0.0106044	0.0967143
ENST00000653710.1|ENSG00000287621.1|OTTHUMG00000195754.1|OTTHUMT00000528588.1|ENST00000653710|ENSG00000287621|2936|	0.111313	0.0106671	0.0972291
ENST00000512428.1|ENSG00000249604.1|OTTHUMG00000161086.1|OTTHUMT00000363710.1|ENST00000512428|ENSG00000249604|3147|	0.111297	0.010676	0.097254
ENST00000662838.1|ENSG00000287383.1|OTTHUMG00000195250.1|OTTHUMT00000525586.1|ENST00000662838|ENSG00000287383|2575|	0.111283	0.0106843	0.0972718
ENST00000515377.1|ENSG00000250001.1|OTTHUMG00000161717.1|OTTHUMT00000365859.1|ENST00000515377|ENSG00000250001|543|	0.111219	0.0107196	0.0975268
ENST00000670668.1|ENSG00000287391.1|OTTHUMG00000195869.1|OTTHUMT00000529152.1|ENST00000670668|ENSG00000287391|1812|	0.11121	0.0107248	0.0975268
ENST00000623250.1|ENSG00000279348.1|OTTHUMG00000176288.1|OTTHUMT00000431724.1|ENST00000623250|ENSG00000279348|2116|	0.111146	0.0107606	0.0977951
ENST00000517529.1|ENSG00000290674.1|-|OTTHUMT00000378306.1|ENST00000517529|ENSG00000290674|1589|	0.111091	0.0107917	0.0980203
ENST00000701517.1|ENSG00000289047.2|-|-|ENST00000701517|ENSG00000289047|3468|	0.111006	0.0108397	0.0983989
ENST00000655281.1|ENSG00000286958.1|OTTHUMG00000193970.1|OTTHUMT00000507901.1|ENST00000655281|ENSG00000286958|500|	0.110985	0.0108513	0.0984468
ENST00000641158.1|ENSG00000223812.8|OTTHUMG00000156168.30|OTTHUMT00000492854.1|PYDC2-AS1-204|PYDC2-AS1|1695|	0.110807	0.0109527	0.0993087
ENST00000507344.1|ENSG00000251527.1|OTTHUMG00000160708.1|OTTHUMT00000361850.1|ENST00000507344|ENSG00000251527|768|	0.110788	0.0109637	0.0993508
ENST00000564354.1|ENSG00000260209.1|OTTHUMG00000173206.1|OTTHUMT00000422466.1|ENST00000564354|ENSG00000260209|808|	0.110728	0.0109975	0.0995986
ENST00000545729.6|ENSG00000246695.9|OTTHUMG00000169126.6|OTTHUMT00000402340.2|RASSF8-AS1-208|RASSF8-AS1|3188|	0.110697	0.0110153	0.0996821
ENST00000562182.1|ENSG00000261020.1|OTTHUMG00000175987.1|OTTHUMT00000431349.1|ENST00000562182|ENSG00000261020|4710|	0.11069	0.0110195	0.0996821
ENST00000662873.1|ENSG00000287072.1|OTTHUMG00000195533.1|OTTHUMT00000527440.1|ENST00000662873|ENSG00000287072|1604|	0.110597	0.0110733	0.10011
ENST00000670062.1|ENSG00000288560.1|OTTHUMG00000195980.1|OTTHUMT00000527199.1|ENST00000670062|ENSG00000288560|1303|	0.110563	0.0110927	0.100206
ENST00000366376.3|ENSG00000203565.3|OTTHUMG00000017940.2|OTTHUMT00000047518.2|ENST00000366376|ENSG00000203565|1986|	0.110556	0.0110967	0.100206
ENST00000623892.1|ENSG00000280164.1|OTTHUMG00000189369.1|OTTHUMT00000479476.1|ENST00000623892|ENSG00000280164|1032|	0.110534	0.0111095	0.100263
ENST00000435295.1|ENSG00000235381.1|OTTHUMG00000015879.1|OTTHUMT00000042804.1|ENST00000435295|ENSG00000235381|3088|	0.110505	0.0111262	0.100306
ENST00000620532.1|ENSG00000276449.1|OTTHUMG00000183379.1|OTTHUMT00000466424.1|ENST00000620532|ENSG00000276449|3323|	0.110503	0.0111272	0.100306
ENST00000609599.1|ENSG00000272986.1|OTTHUMG00000186293.1|OTTHUMT00000472750.1|ENST00000609599|ENSG00000272986|745|	0.110487	0.0111363	0.100329
ENST00000654071.1|ENSG00000285664.2|OTTHUMG00000192708.2|OTTHUMT00000521871.1|ENST00000654071|ENSG00000285664|2569|	0.110469	0.0111468	0.100367
ENST00000628886.1|ENSG00000242290.2|OTTHUMG00000159367.2|OTTHUMT00000481213.1|ZBTB20-AS5-203|ZBTB20-AS5|819|	0.110437	0.0111657	0.100479
ENST00000657664.1|ENSG00000288074.1|OTTHUMG00000195805.1|OTTHUMT00000528869.1|ENST00000657664|ENSG00000288074|3813|	0.110409	0.0111818	0.100565
ENST00000624035.1|ENSG00000279880.1|OTTHUMG00000179781.1|OTTHUMT00000448103.1|ENST00000624035|ENSG00000279880|2139|	0.110394	0.0111903	0.100583
ENST00000655145.1|ENSG00000258903.2|OTTHUMG00000171107.2|OTTHUMT00000524107.1|ENST00000655145|ENSG00000258903|3113|	0.110327	0.0112294	0.100876
ENST00000584036.1|ENSG00000264596.1|OTTHUMG00000178896.1|OTTHUMT00000443805.1|ENST00000584036|ENSG00000264596|1613|	0.110299	0.0112459	0.100932
ENST00000652152.1|ENSG00000286245.1|OTTHUMG00000193318.1|OTTHUMT00000500703.1|ENST00000652152|ENSG00000286245|3913|	0.110294	0.0112485	0.100932
ENST00000552778.2|ENSG00000258302.2|OTTHUMG00000169945.2|OTTHUMT00000406651.2|ENST00000552778|ENSG00000258302|1711|	0.1101	0.0113624	0.101894
ENST00000606115.1|ENSG00000272505.1|OTTHUMG00000185404.1|OTTHUMT00000470441.1|ENST00000606115|ENSG00000272505|2860|	0.11008	0.0113742	0.101942
ENST00000663616.1|ENSG00000203999.10|OTTHUMG00000032719.15|OTTHUMT00000511263.1|LINC01270-211|LINC01270|2951|	0.110046	0.0113946	0.102066
ENST00000424345.5|ENSG00000238113.7|OTTHUMG00000013291.8|OTTHUMT00000128851.1|LINC01410-201|LINC01410|2877|	0.110024	0.0114075	0.102122
ENST00000702115.1|ENSG00000289959.1|-|-|ENST00000702115|ENSG00000289959|1477|	0.10998	0.0114338	0.102299
ENST00000641886.1|ENSG00000290813.1|-|OTTHUMT00000493509.1|ENST00000641886|ENSG00000290813|1107|	0.109927	0.0114648	0.102518
ENST00000614612.1|ENSG00000274204.1|OTTHUMG00000187299.1|OTTHUMT00000474730.1|ENST00000614612|ENSG00000274204|668|	0.109799	0.0115411	0.10314
ENST00000435858.1|ENSG00000226089.2|OTTHUMG00000015096.2|OTTHUMT00000041327.2|ENST00000435858|ENSG00000226089|784|	0.109784	0.0115502	0.103162
ENST00000690704.2|ENSG00000288732.2|-|-|ENST00000690704|ENSG00000288732|576|	0.109766	0.0115612	0.103202
ENST00000688991.1|ENSG00000289310.1|-|-|ENST00000688991|ENSG00000289310|1454|	0.10972	0.0115887	0.103387
ENST00000610270.1|ENSG00000272576.1|OTTHUMG00000186275.1|OTTHUMT00000472580.1|ENST00000610270|ENSG00000272576|610|	0.109688	0.0116075	0.103496
ENST00000685851.1|ENSG00000288836.1|-|-|ENST00000685851|ENSG00000288836|1198|	0.109654	0.0116282	0.103621
ENST00000506471.1|ENSG00000250544.2|OTTHUMG00000162607.4|OTTHUMT00000369751.1|LINC02059-202|LINC02059|2094|	0.10958	0.0116727	0.103958
ENST00000668879.1|ENSG00000287788.1|OTTHUMG00000195500.1|OTTHUMT00000527238.1|ENST00000668879|ENSG00000287788|2085|	0.109565	0.0116816	0.103978
ENST00000652140.1|ENSG00000258028.3|OTTHUMG00000170370.4|OTTHUMT00000502120.1|ENST00000652140|ENSG00000258028|2873|	0.109507	0.0117169	0.104232
ENST00000648514.1|ENSG00000284196.3|OTTHUMG00000191996.3|OTTHUMT00000499664.1|ENST00000648514|ENSG00000284196|3199|	0.109421	0.0117688	0.104634
ENST00000613982.1|ENSG00000273523.1|OTTHUMG00000187319.1|OTTHUMT00000474756.1|ENST00000613982|ENSG00000273523|3433|	0.109396	0.0117844	0.104705
ENST00000624221.1|ENSG00000280159.1|OTTHUMG00000173471.1|OTTHUMT00000423226.1|ENST00000624221|ENSG00000280159|2431|	0.109386	0.0117903	0.104705
ENST00000659561.1|ENSG00000286542.1|OTTHUMG00000195645.1|OTTHUMT00000527943.1|ENST00000659561|ENSG00000286542|722|	0.109282	0.0118539	0.10521
ENST00000664455.1|ENSG00000249436.2|OTTHUMG00000162504.15|OTTHUMT00000369241.2|LNCBRM-207|LNCBRM|1276|	0.109217	0.0118937	0.105503
ENST00000624361.1|ENSG00000278897.1|OTTHUMG00000182302.1|OTTHUMT00000460440.1|ENST00000624361|ENSG00000278897|2271|	0.109182	0.0119152	0.105634
ENST00000690247.1|ENSG00000289530.1|-|-|ENST00000690247|ENSG00000289530|595|	0.109142	0.0119397	0.10579
ENST00000566440.1|ENSG00000260008.1|OTTHUMG00000167321.1|OTTHUMT00000394149.1|ENST00000566440|ENSG00000260008|1957|	0.109069	0.0119851	0.106133
ENST00000655061.1|ENSG00000286693.1|OTTHUMG00000195555.1|OTTHUMT00000527534.1|ENST00000655061|ENSG00000286693|2491|	0.109028	0.0120099	0.106291
ENST00000703087.1|ENSG00000290126.1|-|-|ENST00000703087|ENSG00000290126|1562|	0.10898	0.01204	0.106493
ENST00000658597.1|ENSG00000253877.6|OTTHUMG00000164908.26|OTTHUMT00000507551.1|LINC01608-210|LINC01608|916|	0.108963	0.0120506	0.106493
ENST00000635272.1|ENSG00000282864.1|OTTHUMG00000191490.1|OTTHUMT00000488085.1|ENST00000635272|ENSG00000282864|1078|	0.108958	0.0120533	0.106493
ENST00000602747.1|ENSG00000269887.1|OTTHUMG00000184145.1|OTTHUMT00000468113.1|ENST00000602747|ENSG00000269887|715|	0.108908	0.0120847	0.106711
ENST00000607115.1|ENSG00000271843.1|OTTHUMG00000185740.1|OTTHUMT00000471120.1|ENST00000607115|ENSG00000271843|611|	0.108842	0.0121258	0.107012
ENST00000646480.1|ENSG00000284966.3|OTTHUMG00000192540.3|OTTHUMT00000495677.1|ENST00000646480|ENSG00000284966|5994|	0.108822	0.0121385	0.107064
ENST00000616244.1|ENSG00000276724.1|OTTHUMG00000186803.1|OTTHUMT00000473809.1|ENST00000616244|ENSG00000276724|701|	0.108745	0.0121866	0.107393
ENST00000303922.7|ENSG00000290336.1|-|OTTHUMT00000101930.1|RBMY2FP-202|RBMY2FP|2042|	0.10874	0.0121896	0.107393
ENST00000671278.1|ENSG00000254224.2|OTTHUMG00000164712.2|OTTHUMT00000527529.1|UQCRB-AS1-202|UQCRB-AS1|1416|	0.108714	0.0122061	0.107478
ENST00000614030.1|ENSG00000275649.1|OTTHUMG00000189109.1|OTTHUMT00000478823.1|ENST00000614030|ENSG00000275649|616|	0.108679	0.0122279	0.107608
ENST00000624047.1|ENSG00000279904.1|OTTHUMG00000176113.1|OTTHUMT00000431522.1|ENST00000624047|ENSG00000279904|895|	0.108664	0.0122373	0.10763
ENST00000510767.5|ENSG00000250033.5|OTTHUMG00000161284.2|OTTHUMT00000364382.1|SLC7A11-AS1-202|SLC7A11-AS1|4654|	0.108642	0.0122513	0.107692
ENST00000570809.1|ENSG00000262228.3|OTTHUMG00000177498.1|OTTHUMT00000437193.1|ENST00000570809|ENSG00000262228|1755|	0.108614	0.0122689	0.107786
ENST00000637785.1|ENSG00000283546.1|OTTHUMG00000191669.1|OTTHUMT00000489196.1|ENST00000637785|ENSG00000283546|708|	0.108414	0.0123959	0.10884
ENST00000662515.1|ENSG00000287876.1|OTTHUMG00000194719.1|OTTHUMT00000521189.1|ENST00000662515|ENSG00000287876|2101|	0.108382	0.0124158	0.108953
ENST00000441759.1|ENSG00000234034.1|OTTHUMG00000078247.1|OTTHUMT00000171049.1|ENST00000441759|ENSG00000234034|977|	0.108341	0.0124422	0.109123
ENST00000473426.1|ENSG00000283994.1|OTTHUMG00000131845.8|OTTHUMT00000332232.1|ENST00000473426|ENSG00000283994|1517|	0.10826	0.0124942	0.109518
ENST00000671059.1|ENSG00000233593.12|OTTHUMG00000010018.21|OTTHUMT00000527913.1|LINC02609-224|LINC02609|2118|	0.108246	0.0125029	0.109533
ENST00000512817.1|ENSG00000257127.6|OTTHUMG00000170103.2|OTTHUMT00000366641.1|CLLU1-203|CLLU1|2274|	0.108212	0.0125247	0.109662
ENST00000652498.1|ENSG00000286189.1|OTTHUMG00000193510.2|OTTHUMT00000502560.2|ENST00000652498|ENSG00000286189|551|	0.1082	0.0125326	0.109669
ENST00000701059.1|ENSG00000281357.5|OTTHUMG00000189546.2|-|ARRDC3-AS1-209|ARRDC3-AS1|2628|	0.108104	0.0125946	0.11015
ENST00000670564.1|ENSG00000287767.1|OTTHUMG00000194464.1|OTTHUMT00000516725.1|ENST00000670564|ENSG00000287767|1451|	0.108024	0.0126463	0.11054
ENST00000692173.1|ENSG00000291112.1|-|-|ENST00000692173|ENSG00000291112|4164|	0.108005	0.0126584	0.110583
ENST00000541888.2|ENSG00000256433.3|OTTHUMG00000168357.3|OTTHUMT00000399434.2|ENST00000541888|ENSG00000256433|1803|	0.107937	0.0127028	0.110909
ENST00000593619.1|ENSG00000291291.1|OTTHUMG00000074322.7|OTTHUMT00000461817.1|ENST00000593619|ENSG00000291291|599|	0.107789	0.0127993	0.111689
ENST00000555688.1|ENSG00000258441.1|OTTHUMG00000170756.1|OTTHUMT00000410217.1|LINC00641-202|LINC00641|1763|	0.107745	0.0128279	0.111819
ENST00000503602.6|ENSG00000250132.6|OTTHUMG00000185787.1|OTTHUMT00000471256.1|ENST00000503602|ENSG00000250132|3207|	0.107742	0.0128302	0.111819
ENST00000665073.1|ENSG00000287591.1|OTTHUMG00000195497.1|OTTHUMT00000527205.1|ENST00000665073|ENSG00000287591|2086|	0.107733	0.0128358	0.111819
ENST00000522190.1|ENSG00000254165.1|OTTHUMG00000164171.1|OTTHUMT00000377593.1|ENST00000522190|ENSG00000254165|708|	0.107701	0.0128566	0.111937
ENST00000499966.2|ENSG00000246898.2|OTTHUMG00000175510.1|OTTHUMT00000430314.1|LINC00920-201|LINC00920|2155|	0.107679	0.0128713	0.111976
ENST00000668669.1|ENSG00000251442.8|OTTHUMG00000160897.15|OTTHUMT00000527169.1|LINC01094-216|LINC01094|2476|	0.107662	0.0128825	0.111976
ENST00000669659.1|ENSG00000238217.7|OTTHUMG00000154493.5|OTTHUMT00000528967.1|LINC01877-211|LINC01877|3008|	0.107662	0.0128827	0.111976
ENST00000440197.2|ENSG00000236756.4|OTTHUMG00000018460.4|OTTHUMT00000048635.3|DNAJC9-AS1-204|DNAJC9-AS1|2865|	0.107612	0.0129151	0.112136
ENST00000623836.1|ENSG00000280083.1|OTTHUMG00000176273.1|OTTHUMT00000431709.1|ENST00000623836|ENSG00000280083|1953|	0.107607	0.0129187	0.112136
ENST00000664888.1|ENSG00000286951.1|OTTHUMG00000194886.1|OTTHUMT00000522893.1|ENST00000664888|ENSG00000286951|2720|	0.107596	0.012926	0.112136
ENST00000656348.1|ENSG00000286952.1|OTTHUMG00000195622.1|OTTHUMT00000527877.1|ENST00000656348|ENSG00000286952|2472|	0.10759	0.0129299	0.112136
ENST00000670278.1|ENSG00000242009.2|OTTHUMG00000159007.9|OTTHUMT00000524608.1|ENST00000670278|ENSG00000242009|1706|	0.107546	0.0129589	0.112325
ENST00000614647.1|ENSG00000274156.1|OTTHUMG00000187369.1|OTTHUMT00000474835.1|ENST00000614647|ENSG00000274156|523|	0.107503	0.0129873	0.112508
ENST00000477875.6|ENSG00000290604.1|-|OTTHUMT00000081454.2|FMO9P-202|FMO9P|1364|	0.107392	0.0130612	0.113077
ENST00000670186.1|ENSG00000288004.1|OTTHUMG00000194866.1|OTTHUMT00000522703.1|ENST00000670186|ENSG00000288004|714|	0.107383	0.0130675	0.113077
ENST00000623378.1|ENSG00000279025.1|OTTHUMG00000175983.1|OTTHUMT00000431345.1|ENST00000623378|ENSG00000279025|1080|	0.10731	0.0131161	0.113398
ENST00000654977.1|ENSG00000286711.1|OTTHUMG00000195160.1|OTTHUMT00000524879.1|ENST00000654977|ENSG00000286711|1371|	0.107306	0.0131191	0.113398
ENST00000449316.2|ENSG00000226203.2|OTTHUMG00000150168.2|OTTHUMT00000316666.2|LINC01733-201|LINC01733|4621|	0.107284	0.0131338	0.113406
ENST00000608314.1|ENSG00000272905.1|OTTHUMG00000186216.1|OTTHUMT00000472431.1|ENST00000608314|ENSG00000272905|668|	0.107282	0.0131347	0.113406
ENST00000609675.1|ENSG00000273487.1|OTTHUMG00000186163.1|OTTHUMT00000472344.1|ENST00000609675|ENSG00000273487|1293|	0.107253	0.0131542	0.113511
ENST00000507630.1|ENSG00000251456.1|OTTHUMG00000163254.1|OTTHUMT00000372360.1|ENST00000507630|ENSG00000251456|558|	0.107235	0.0131663	0.113553
ENST00000520085.2|ENSG00000289810.1|OTTHUMG00000164542.4|OTTHUMT00000372640.1|ENST00000520085|ENSG00000289810|1205|	0.10717	0.0132102	0.113868
ENST00000564305.1|ENSG00000261617.2|OTTHUMG00000177055.5|OTTHUMT00000435112.1|LINC02177-201|LINC02177|5298|	0.107132	0.0132357	0.114025
ENST00000604955.1|ENSG00000271156.1|OTTHUMG00000185114.1|OTTHUMT00000469623.1|ENST00000604955|ENSG00000271156|591|	0.107056	0.0132872	0.114405
ENST00000616116.1|ENSG00000275236.1|OTTHUMG00000186984.2|OTTHUMT00000474171.1|ENST00000616116|ENSG00000275236|1460|	0.10698	0.0133383	0.114781
ENST00000567141.1|ENSG00000261762.1|OTTHUMG00000177203.1|OTTHUMT00000435831.1|ENST00000567141|ENSG00000261762|2154|	0.106941	0.013365	0.114948
ENST00000667592.1|ENSG00000287015.1|OTTHUMG00000194364.1|OTTHUMT00000515219.1|ENST00000667592|ENSG00000287015|719|	0.106921	0.0133787	0.115002
ENST00000370624.1|ENSG00000180869.4|OTTHUMG00000009923.1|OTTHUMT00000027461.1|LINC01555-201|LINC01555|2884|	0.106897	0.013395	0.115078
ENST00000650159.1|ENSG00000257523.3|OTTHUMG00000170371.6|OTTHUMT00000497816.1|LINC02326-202|LINC02326|1184|	0.106858	0.0134214	0.115221
ENST00000624017.1|ENSG00000278928.1|OTTHUMG00000177971.1|OTTHUMT00000440033.1|ENST00000624017|ENSG00000278928|2304|	0.106821	0.0134472	0.115221
ENST00000623278.1|ENSG00000279741.1|OTTHUMG00000177940.1|OTTHUMT00000439841.1|ENST00000623278|ENSG00000279741|678|	0.106816	0.0134501	0.115221
ENST00000605586.1|ENSG00000271208.1|OTTHUMG00000185110.1|OTTHUMT00000469619.1|ENST00000605586|ENSG00000271208|594|	0.106814	0.0134514	0.115221
ENST00000580659.1|ENSG00000265555.1|OTTHUMG00000178543.1|OTTHUMT00000442420.1|LINC01903-201|LINC01903|2149|	0.106805	0.0134578	0.115221
ENST00000658142.1|ENSG00000226486.2|OTTHUMG00000035542.2|OTTHUMT00000520710.1|LINC01035-202|LINC01035|1311|	0.106798	0.0134628	0.115221
ENST00000586373.1|ENSG00000267603.1|OTTHUMG00000180348.1|OTTHUMT00000450875.1|LINC01028-201|LINC01028|1045|	0.106793	0.0134661	0.115221
ENST00000667035.1|ENSG00000286300.1|OTTHUMG00000195094.1|OTTHUMT00000524413.1|ENST00000667035|ENSG00000286300|1940|	0.106781	0.0134746	0.115221
ENST00000605885.1|ENSG00000271730.1|OTTHUMG00000185805.1|OTTHUMT00000471331.1|ENST00000605885|ENSG00000271730|644|	0.106771	0.0134812	0.115221
ENST00000543308.1|ENSG00000256218.1|OTTHUMG00000168647.1|OTTHUMT00000400481.1|ENST00000543308|ENSG00000256218|1727|	0.106764	0.0134856	0.115221
ENST00000619110.1|ENSG00000278601.1|OTTHUMG00000186514.1|OTTHUMT00000473277.1|ENST00000619110|ENSG00000278601|700|	0.106628	0.0135793	0.115957
ENST00000661054.1|ENSG00000287831.1|OTTHUMG00000195745.1|OTTHUMT00000528575.1|ENST00000661054|ENSG00000287831|2518|	0.106541	0.0136399	0.116401
ENST00000617300.1|ENSG00000273987.1|OTTHUMG00000187280.1|OTTHUMT00000474691.1|ENST00000617300|ENSG00000273987|689|	0.106531	0.0136463	0.116401
ENST00000609288.1|ENSG00000273181.1|OTTHUMG00000186108.1|OTTHUMT00000472266.1|ENST00000609288|ENSG00000273181|620|	0.106421	0.0137231	0.116876
ENST00000425296.1|ENSG00000224822.1|OTTHUMG00000155680.1|OTTHUMT00000341247.1|THRB-IT1-201|THRB-IT1|1754|	0.10642	0.0137236	0.116876
ENST00000437833.2|ENSG00000288670.1|-|-|ENST00000437833|ENSG00000288670|1807|	0.106419	0.0137244	0.116876
ENST00000660715.1|ENSG00000286471.1|OTTHUMG00000195637.1|OTTHUMT00000527931.1|ENST00000660715|ENSG00000286471|2094|	0.106369	0.0137595	0.11711
ENST00000624392.1|ENSG00000279314.1|OTTHUMG00000175978.1|OTTHUMT00000431340.1|ENST00000624392|ENSG00000279314|1622|	0.106352	0.0137714	0.117147
ENST00000509628.1|ENSG00000251488.1|OTTHUMG00000161298.1|OTTHUMT00000364453.1|ENST00000509628|ENSG00000251488|587|	0.106333	0.0137846	0.117195
ENST00000665274.1|ENSG00000288087.1|OTTHUMG00000195420.1|OTTHUMT00000526825.1|ENST00000665274|ENSG00000288087|1073|	0.106289	0.0138154	0.117393
ENST00000451062.1|ENSG00000290448.1|-|OTTHUMT00000472793.1|FAM197Y9-202|FAM197Y9|2332|	0.106225	0.0138602	0.117655
ENST00000510391.1|ENSG00000251294.1|OTTHUMG00000161879.1|OTTHUMT00000366279.1|ENST00000510391|ENSG00000251294|1791|	0.106223	0.0138614	0.117655
ENST00000554319.1|ENSG00000258845.1|OTTHUMG00000170730.1|OTTHUMT00000410126.1|ENST00000554319|ENSG00000258845|645|	0.106199	0.0138781	0.117733
ENST00000431369.1|ENSG00000225775.1|OTTHUMG00000014226.1|OTTHUMT00000039804.1|ENST00000431369|ENSG00000225775|661|	0.106141	0.0139193	0.117995
ENST00000656956.1|ENSG00000248869.7|OTTHUMG00000161243.6|OTTHUMT00000525591.1|LINC02511-205|LINC02511|2527|	0.10611	0.0139412	0.117995
ENST00000579833.1|ENSG00000264212.1|OTTHUMG00000179136.1|OTTHUMT00000444930.1|ENST00000579833|ENSG00000264212|922|	0.106104	0.0139451	0.117995
ENST00000651680.1|ENSG00000286225.1|OTTHUMG00000192898.1|OTTHUMT00000499518.1|ENST00000651680|ENSG00000286225|1760|	0.106102	0.0139463	0.117995
ENST00000482372.1|ENSG00000242428.6|OTTHUMG00000159203.2|OTTHUMT00000353817.1|CFAP20DC-AS1-202|CFAP20DC-AS1|2203|	0.106102	0.0139469	0.117995
ENST00000515860.1|ENSG00000249381.1|OTTHUMG00000161287.1|OTTHUMT00000364393.1|LINC00500-201|LINC00500|539|	0.10608	0.0139624	0.118019
ENST00000658557.1|ENSG00000259953.2|OTTHUMG00000175583.2|OTTHUMT00000521589.1|LINC02977-204|LINC02977|2285|	0.106076	0.013965	0.118019
ENST00000332881.3|ENSG00000183562.3|OTTHUMG00000187445.1|OTTHUMT00000474985.1|ENST00000332881|ENSG00000183562|1482|	0.106016	0.0140078	0.118316
ENST00000552736.2|ENSG00000257835.2|OTTHUMG00000169975.2|OTTHUMT00000406728.2|ENST00000552736|ENSG00000257835|652|	0.105988	0.0140272	0.118417
ENST00000687649.1|ENSG00000288895.2|-|-|ENST00000687649|ENSG00000288895|1548|	0.105966	0.0140429	0.118485
ENST00000602396.1|ENSG00000269945.1|OTTHUMG00000183951.1|OTTHUMT00000467569.1|ENST00000602396|ENSG00000269945|3625|	0.105909	0.0140831	0.11876
ENST00000670096.1|ENSG00000287992.1|OTTHUMG00000195540.1|OTTHUMT00000527458.1|ENST00000670096|ENSG00000287992|1398|	0.10588	0.0141038	0.11887
ENST00000561595.1|ENSG00000261743.1|OTTHUMG00000177082.1|OTTHUMT00000435212.1|ENST00000561595|ENSG00000261743|556|	0.105858	0.01412	0.118941
ENST00000661308.1|ENSG00000236387.2|OTTHUMG00000031781.3|OTTHUMT00000521969.1|ENST00000661308|ENSG00000236387|1160|	0.105824	0.0141441	0.11908
ENST00000666011.1|ENSG00000287662.1|OTTHUMG00000195549.1|OTTHUMT00000527516.1|ENST00000666011|ENSG00000287662|878|	0.105781	0.0141751	0.119276
ENST00000664574.1|ENSG00000253376.2|OTTHUMG00000164280.4|OTTHUMT00000503453.2|ENST00000664574|ENSG00000253376|1251|	0.105755	0.0141932	0.119302
ENST00000509964.1|ENSG00000250819.2|OTTHUMG00000160219.2|OTTHUMT00000359704.1|LINC02493-201|LINC02493|1704|	0.105743	0.0142024	0.119302
ENST00000653002.1|ENSG00000228412.9|OTTHUMG00000014330.26|OTTHUMT00000526948.1|LNC-LBCS-214|LNC-LBCS|3407|	0.105739	0.014205	0.119302
ENST00000625022.1|ENSG00000280053.1|OTTHUMG00000175765.1|OTTHUMT00000431044.1|ENST00000625022|ENSG00000280053|3362|	0.105734	0.0142089	0.119302
ENST00000640245.1|ENSG00000291181.1|-|OTTHUMT00000492402.4|ENST00000640245|ENSG00000291181|1707|	0.105655	0.0142653	0.119712
ENST00000624827.1|ENSG00000279697.1|OTTHUMG00000167617.1|OTTHUMT00000395413.1|ENST00000624827|ENSG00000279697|617|	0.105633	0.0142811	0.119765
ENST00000652633.1|ENSG00000270071.5|OTTHUMG00000184146.4|OTTHUMT00000500288.2|ENST00000652633|ENSG00000270071|1245|	0.105622	0.0142896	0.119765
ENST00000623151.1|ENSG00000279521.1|OTTHUMG00000170314.2|OTTHUMT00000408475.2|ENST00000623151|ENSG00000279521|2376|	0.105614	0.0142948	0.119765
ENST00000598988.1|ENSG00000268987.1|OTTHUMG00000182773.1|OTTHUMT00000463550.1|ENST00000598988|ENSG00000268987|540|	0.105602	0.0143038	0.119776
ENST00000500358.6|ENSG00000246090.9|OTTHUMG00000161232.6|OTTHUMT00000364248.1|ENST00000500358|ENSG00000246090|4825|	0.105544	0.0143459	0.120064
ENST00000430643.1|ENSG00000230896.1|OTTHUMG00000085067.1|OTTHUMT00000192833.1|ENST00000430643|ENSG00000230896|598|	0.105509	0.0143709	0.120208
ENST00000463645.1|ENSG00000290616.1|-|OTTHUMT00000332210.1|ENST00000463645|ENSG00000290616|656|	0.105471	0.0143986	0.120375
ENST00000671643.1|ENSG00000286288.2|OTTHUMG00000031681.10|OTTHUMT00000525444.1|ENST00000671643|ENSG00000286288|4575|	0.10545	0.0144136	0.120436
ENST00000669358.1|ENSG00000286703.1|OTTHUMG00000194164.1|OTTHUMT00000511799.1|ENST00000669358|ENSG00000286703|2415|	0.105436	0.0144237	0.120455
ENST00000607746.1|ENSG00000271856.1|OTTHUMG00000185591.1|OTTHUMT00000470793.1|LINC01215-201|LINC01215|2592|	0.105416	0.0144386	0.120516
ENST00000670154.1|ENSG00000287519.1|OTTHUMG00000195237.1|OTTHUMT00000525508.1|ENST00000670154|ENSG00000287519|2916|	0.105405	0.0144465	0.120517
ENST00000667537.1|ENSG00000286452.1|OTTHUMG00000194357.1|OTTHUMT00000514793.1|ENST00000667537|ENSG00000286452|1175|	0.105376	0.0144674	0.120626
ENST00000614061.1|ENSG00000278765.1|OTTHUMG00000186653.1|OTTHUMT00000473551.1|ENST00000614061|ENSG00000278765|590|	0.105355	0.0144828	0.12069
ENST00000522189.1|ENSG00000253693.1|OTTHUMG00000163870.1|OTTHUMT00000376060.1|ENST00000522189|ENSG00000253693|734|	0.105316	0.0145115	0.120864
ENST00000497988.1|ENSG00000244738.1|OTTHUMG00000158859.1|OTTHUMT00000352445.1|ENST00000497988|ENSG00000244738|3097|	0.105283	0.0145358	0.121002
ENST00000560740.1|ENSG00000259644.1|OTTHUMG00000172190.1|OTTHUMT00000417268.1|ENST00000560740|ENSG00000259644|1346|	0.105267	0.0145473	0.121005
ENST00000610630.1|ENSG00000275409.1|OTTHUMG00000187235.1|OTTHUMT00000474619.1|ENST00000610630|ENSG00000275409|553|	0.105261	0.0145517	0.121005
ENST00000658567.1|ENSG00000286370.1|OTTHUMG00000195390.1|OTTHUMT00000526734.1|ENST00000658567|ENSG00000286370|1036|	0.105247	0.0145623	0.121028
ENST00000663233.1|ENSG00000287936.1|OTTHUMG00000194880.1|OTTHUMT00000522849.1|ENST00000663233|ENSG00000287936|1994|	0.105217	0.0145841	0.121145
ENST00000623908.1|ENSG00000279952.1|OTTHUMG00000168448.1|OTTHUMT00000399776.1|ENST00000623908|ENSG00000279952|691|	0.105149	0.0146339	0.121493
ENST00000415237.1|ENSG00000203446.2|OTTHUMG00000155092.1|OTTHUMT00000338386.1|SUGCT-AS1-201|SUGCT-AS1|1771|	0.105122	0.0146541	0.121539
ENST00000624124.1|ENSG00000278989.1|OTTHUMG00000167216.1|OTTHUMT00000393766.1|ENST00000624124|ENSG00000278989|2359|	0.105121	0.014655	0.121539
ENST00000690077.1|ENSG00000289107.1|-|-|ENST00000690077|ENSG00000289107|2811|	0.105004	0.0147416	0.122192
ENST00000422909.1|ENSG00000232590.1|OTTHUMG00000020021.1|OTTHUMT00000052687.1|ENST00000422909|ENSG00000232590|624|	0.104975	0.0147629	0.122303
ENST00000624880.1|ENSG00000279090.1|OTTHUMG00000163670.3|OTTHUMT00000374716.3|ENST00000624880|ENSG00000279090|701|	0.104932	0.0147944	0.122499
ENST00000616350.1|ENSG00000273925.1|OTTHUMG00000186856.2|OTTHUMT00000473917.2|ENST00000616350|ENSG00000273925|526|	0.104905	0.0148146	0.122601
ENST00000623862.1|ENSG00000279860.1|OTTHUMG00000175432.1|OTTHUMT00000429944.1|ENST00000623862|ENSG00000279860|2313|	0.104877	0.0148353	0.122707
ENST00000426030.2|ENSG00000228686.2|OTTHUMG00000034984.2|OTTHUMT00000084670.2|ENST00000426030|ENSG00000228686|629|	0.104857	0.0148509	0.12277
ENST00000653824.2|ENSG00000229588.3|OTTHUMG00000034556.3|OTTHUMT00000520604.1|ENST00000653824|ENSG00000229588|2342|	0.104826	0.0148734	0.12287
ENST00000609969.1|ENSG00000272597.1|OTTHUMG00000185877.1|OTTHUMT00000471597.1|ENST00000609969|ENSG00000272597|533|	0.104819	0.0148787	0.12287
ENST00000662995.1|ENSG00000233828.5|OTTHUMG00000195982.1|OTTHUMT00000527135.1|MIR4280HG-202|MIR4280HG|2509|	0.104806	0.0148888	0.122888
ENST00000505448.3|ENSG00000251615.3|OTTHUMG00000160053.5|OTTHUMT00000359029.5|ENST00000505448|ENSG00000251615|3249|	0.104716	0.0149562	0.123379
ENST00000666258.1|ENSG00000286513.1|OTTHUMG00000195728.1|OTTHUMT00000528472.1|ENST00000666258|ENSG00000286513|985|	0.104664	0.0149955	0.123637
ENST00000662193.1|ENSG00000287596.1|OTTHUMG00000195881.1|OTTHUMT00000529215.1|ENST00000662193|ENSG00000287596|915|	0.10463	0.0150211	0.123783
ENST00000608605.1|ENSG00000273356.1|OTTHUMG00000175710.2|OTTHUMT00000430889.2|LINC02019-201|LINC02019|2060|	0.104591	0.0150499	0.123954
ENST00000660720.1|ENSG00000286674.1|OTTHUMG00000195598.1|OTTHUMT00000527697.1|ENST00000660720|ENSG00000286674|2058|	0.104579	0.0150594	0.123967
ENST00000667135.1|ENSG00000204860.5|OTTHUMG00000019948.3|OTTHUMT00000522588.1|FAM201A-205|FAM201A|3072|	0.104548	0.0150825	0.124078
ENST00000458007.2|ENSG00000241772.2|OTTHUMG00000153633.2|OTTHUMT00000331894.2|ENST00000458007|ENSG00000241772|744|	0.10454	0.0150889	0.124078
ENST00000565944.1|ENSG00000260331.1|OTTHUMG00000175734.1|OTTHUMT00000430922.1|ENST00000565944|ENSG00000260331|819|	0.104508	0.0151129	0.12421
ENST00000669986.1|ENSG00000224934.6|OTTHUMG00000018883.5|OTTHUMT00000522872.1|GOT1-DT-209|GOT1-DT|5667|	0.104475	0.0151377	0.124316
ENST00000366451.3|ENSG00000203644.3|OTTHUMG00000186578.1|OTTHUMT00000473409.1|ENST00000366451|ENSG00000203644|910|	0.10446	0.0151492	0.124316
ENST00000615979.1|ENSG00000275155.1|OTTHUMG00000186926.1|OTTHUMT00000474024.1|ENST00000615979|ENSG00000275155|615|	0.10446	0.0151497	0.124316
ENST00000666428.1|ENSG00000288084.1|OTTHUMG00000195464.1|OTTHUMT00000527064.1|ENST00000666428|ENSG00000288084|2311|	0.104434	0.0151688	0.124349
ENST00000564492.1|ENSG00000259974.5|OTTHUMG00000046240.3|OTTHUMT00000106574.2|LINC00261-202|LINC00261|4912|	0.104433	0.0151698	0.124349
ENST00000560153.2|ENSG00000259527.2|OTTHUMG00000171964.2|OTTHUMT00000416151.2|LINC00052-201|LINC00052|1966|	0.1044	0.0151951	0.124438
ENST00000647916.1|ENSG00000259039.3|OTTHUMG00000171319.3|OTTHUMT00000499235.1|ENST00000647916|ENSG00000259039|1277|	0.104396	0.0151979	0.124438
ENST00000663633.1|ENSG00000248673.2|OTTHUMG00000162462.3|OTTHUMT00000527068.1|LINC01331-203|LINC01331|1785|	0.104387	0.0152046	0.124438
ENST00000692712.2|ENSG00000289280.2|-|-|ENST00000692712|ENSG00000289280|1263|	0.104322	0.0152546	0.124781
ENST00000507838.1|ENSG00000249500.1|OTTHUMG00000161098.1|OTTHUMT00000363773.1|LINC01179-201|LINC01179|2163|	0.104285	0.0152831	0.124949
ENST00000569242.1|ENSG00000259841.6|OTTHUMG00000176250.2|OTTHUMT00000431678.2|LINC01566-202|LINC01566|2801|	0.10427	0.0152942	0.124974
ENST00000427229.2|ENSG00000243349.2|OTTHUMG00000018074.2|OTTHUMT00000470688.1|ENST00000427229|ENSG00000243349|3637|	0.10418	0.0153637	0.125476
ENST00000414512.1|ENSG00000236451.3|OTTHUMG00000153857.3|OTTHUMT00000332710.1|ENST00000414512|ENSG00000236451|2062|	0.104117	0.0154119	0.125782
ENST00000559302.1|ENSG00000259185.1|OTTHUMG00000172539.1|OTTHUMT00000419017.1|ENST00000559302|ENSG00000259185|510|	0.10411	0.0154174	0.125782
ENST00000609270.1|ENSG00000273073.1|OTTHUMG00000186045.1|OTTHUMT00000472121.1|ENST00000609270|ENSG00000273073|580|	0.104066	0.015451	0.12599
ENST00000566449.1|ENSG00000259791.1|OTTHUMG00000176019.1|OTTHUMT00000431390.1|ENST00000566449|ENSG00000259791|554|	0.10399	0.01551	0.126405
ENST00000624471.1|ENSG00000279758.1|OTTHUMG00000173043.1|OTTHUMT00000421917.1|ENST00000624471|ENSG00000279758|737|	0.103969	0.0155263	0.126471
ENST00000654316.1|ENSG00000287534.1|OTTHUMG00000195552.1|OTTHUMT00000527526.1|ENST00000654316|ENSG00000287534|2825|	0.103921	0.0155637	0.12671
ENST00000448131.1|ENSG00000230190.1|OTTHUMG00000152747.1|OTTHUMT00000327674.1|ENST00000448131|ENSG00000230190|1116|	0.103904	0.015577	0.126751
ENST00000515181.1|ENSG00000251329.1|OTTHUMG00000160346.1|OTTHUMT00000360314.1|LINC02353-201|LINC02353|849|	0.103865	0.0156071	0.12693
ENST00000607214.1|ENSG00000272182.1|OTTHUMG00000185735.1|OTTHUMT00000471115.1|ENST00000607214|ENSG00000272182|561|	0.10384	0.0156265	0.126975
ENST00000660705.1|ENSG00000287477.1|OTTHUMG00000194851.1|OTTHUMT00000522602.1|ENST00000660705|ENSG00000287477|3082|	0.103823	0.0156397	0.126975
ENST00000614212.1|ENSG00000274227.1|OTTHUMG00000187449.1|OTTHUMT00000474992.1|ENST00000614212|ENSG00000274227|627|	0.103822	0.0156407	0.126975
ENST00000652791.1|ENSG00000286728.1|OTTHUMG00000195800.1|OTTHUMT00000528841.1|ENST00000652791|ENSG00000286728|2647|	0.103808	0.0156518	0.126975
ENST00000660530.1|ENSG00000286983.1|OTTHUMG00000195057.1|OTTHUMT00000524145.1|ENST00000660530|ENSG00000286983|2711|	0.103799	0.0156587	0.126975
ENST00000619068.1|ENSG00000276778.1|OTTHUMG00000186522.1|OTTHUMT00000473287.1|LINC02227-201|LINC02227|3748|	0.103789	0.0156664	0.126975
ENST00000540399.1|ENSG00000256994.2|OTTHUMG00000168808.5|OTTHUMT00000401154.2|LINC02378-201|LINC02378|1003|	0.103783	0.0156709	0.126975
ENST00000660648.1|ENSG00000287732.1|OTTHUMG00000194598.1|OTTHUMT00000519402.1|ENST00000660648|ENSG00000287732|1029|	0.103774	0.0156779	0.126975
ENST00000625030.1|ENSG00000279256.1|OTTHUMG00000175495.1|OTTHUMT00000430273.1|ENST00000625030|ENSG00000279256|1899|	0.103725	0.0157167	0.127223
ENST00000692625.1|ENSG00000288928.1|-|-|ENST00000692625|ENSG00000288928|1766|	0.103691	0.015743	0.12737
ENST00000558905.1|ENSG00000259627.1|OTTHUMG00000172146.1|OTTHUMT00000417108.1|ENST00000558905|ENSG00000259627|691|	0.103652	0.0157744	0.127557
ENST00000450004.1|ENSG00000226957.1|OTTHUMG00000008097.1|OTTHUMT00000022172.1|ENST00000450004|ENSG00000226957|649|	0.103635	0.0157872	0.127594
ENST00000604271.2|ENSG00000270571.2|OTTHUMG00000185268.2|OTTHUMT00000470018.2|ENST00000604271|ENSG00000270571|3438|	0.103599	0.0158161	0.127761
ENST00000605334.1|ENSG00000271141.1|OTTHUMG00000185187.1|OTTHUMT00000469762.1|ENST00000605334|ENSG00000271141|543|	0.103576	0.0158337	0.127837
ENST00000637876.1|ENSG00000236197.5|OTTHUMG00000155562.4|OTTHUMT00000488876.1|PPP1R9A-AS1-203|PPP1R9A-AS1|1786|	0.103549	0.0158555	0.127947
ENST00000610494.1|ENSG00000278291.1|OTTHUMG00000187101.2|OTTHUMT00000474417.2|ENST00000610494|ENSG00000278291|4412|	0.103535	0.0158663	0.127967
ENST00000440244.1|ENSG00000225595.2|OTTHUMG00000084882.2|OTTHUMT00000192594.1|LINC01623-201|LINC01623|2458|	0.103487	0.0159042	0.128206
ENST00000445178.1|ENSG00000234653.1|OTTHUMG00000152840.1|OTTHUMT00000328223.1|LRRTM4-AS1-201|LRRTM4-AS1|1000|	0.103454	0.0159307	0.128304
ENST00000448006.5|ENSG00000290332.1|-|OTTHUMT00000099481.1|ENST00000448006|ENSG00000290332|2338|	0.103451	0.0159328	0.128304
ENST00000664129.1|ENSG00000224322.2|OTTHUMG00000133703.3|OTTHUMT00000519645.1|ENST00000664129|ENSG00000224322|811|	0.103418	0.0159589	0.128426
ENST00000654339.1|ENSG00000287195.1|OTTHUMG00000195514.1|OTTHUMT00000527295.1|ENST00000654339|ENSG00000287195|2038|	0.103409	0.0159662	0.128426
ENST00000624851.1|ENSG00000279065.1|OTTHUMG00000175962.1|OTTHUMT00000431318.1|ENST00000624851|ENSG00000279065|1594|	0.103401	0.0159727	0.128426
ENST00000648838.2|ENSG00000285894.2|OTTHUMG00000193212.3|OTTHUMT00000500468.3|ENST00000648838|ENSG00000285894|1406|	0.103356	0.0160083	0.128635
ENST00000658292.1|ENSG00000259807.2|OTTHUMG00000176712.4|OTTHUMT00000524556.1|ENST00000658292|ENSG00000259807|3168|	0.103347	0.0160153	0.128635
ENST00000583687.1|ENSG00000265533.1|OTTHUMG00000178538.1|OTTHUMT00000442415.1|DSEL-AS1-201|DSEL-AS1|2991|	0.103246	0.0160965	0.12922
ENST00000665330.1|ENSG00000232656.10|OTTHUMG00000017535.5|OTTHUMT00000046402.3|IDI2-AS1-206|IDI2-AS1|2149|	0.10321	0.0161254	0.129346
ENST00000658046.1|ENSG00000254055.2|OTTHUMG00000164414.6|OTTHUMT00000523057.1|ENST00000658046|ENSG00000254055|1261|	0.103205	0.0161288	0.129346
ENST00000425449.1|ENSG00000228035.1|OTTHUMG00000011974.1|OTTHUMT00000033101.1|NGF-AS1-201|NGF-AS1|2610|	0.103185	0.0161452	0.129411
ENST00000442145.5|ENSG00000237802.7|OTTHUMG00000193497.1|OTTHUMT00000099504.1|FAM197Y6-201|FAM197Y6|2340|	0.103169	0.0161578	0.129445
ENST00000511279.1|ENSG00000251517.1|OTTHUMG00000161042.1|OTTHUMT00000363529.1|ENST00000511279|ENSG00000251517|1128|	0.103133	0.0161866	0.129553
ENST00000670272.1|ENSG00000287171.1|OTTHUMG00000193770.1|OTTHUMT00000504595.1|ENST00000670272|ENSG00000287171|4076|	0.103132	0.0161879	0.129553
ENST00000414686.1|ENSG00000235795.1|OTTHUMG00000010830.1|OTTHUMT00000029895.1|ENST00000414686|ENSG00000235795|671|	0.103054	0.0162509	0.12999
ENST00000645747.1|ENSG00000285219.4|OTTHUMG00000160417.16|OTTHUMT00000495588.1|HULC-270|HULC|1783|	0.103034	0.0162666	0.130049
ENST00000433321.5|ENSG00000228383.7|OTTHUMG00000193496.1|OTTHUMT00000099501.1|FAM197Y7-201|FAM197Y7|2325|	0.102985	0.0163068	0.130303
ENST00000702894.1|ENSG00000290084.1|-|-|ENST00000702894|ENSG00000290084|1809|	0.102938	0.0163444	0.130537
ENST00000649628.1|ENSG00000285669.1|OTTHUMG00000192824.1|OTTHUMT00000499285.1|ENST00000649628|ENSG00000285669|4587|	0.102836	0.0164279	0.131079
ENST00000424650.1|ENSG00000224204.1|OTTHUMG00000021240.1|OTTHUMT00000056034.1|PHEX-AS1-201|PHEX-AS1|1906|	0.102834	0.0164292	0.131079
ENST00000525797.1|ENSG00000290498.1|-|OTTHUMT00000388976.1|ENST00000525797|ENSG00000290498|1754|	0.102798	0.0164583	0.131244
ENST00000658651.1|ENSG00000287399.1|OTTHUMG00000195741.1|OTTHUMT00000528548.1|ENST00000658651|ENSG00000287399|2075|	0.10274	0.0165059	0.131534
ENST00000624945.1|ENSG00000279159.1|OTTHUMG00000189264.1|OTTHUMT00000479246.1|ENST00000624945|ENSG00000279159|49287|	0.102733	0.0165115	0.131534
ENST00000670518.1|ENSG00000229236.3|OTTHUMG00000036431.10|OTTHUMT00000505660.1|TTTY10-213|TTTY10|2156|	0.10269	0.0165469	0.131748
ENST00000530045.5|ENSG00000255234.6|OTTHUMG00000167091.2|OTTHUMT00000393076.1|CCDC90B-AS1-201|CCDC90B-AS1|2643|	0.102625	0.0166003	0.132036
ENST00000670671.1|ENSG00000287937.1|OTTHUMG00000195699.1|OTTHUMT00000528299.1|ENST00000670671|ENSG00000287937|2562|	0.102621	0.0166037	0.132036
ENST00000428485.1|ENSG00000226159.2|OTTHUMG00000018728.2|OTTHUMT00000049336.1|LINC01375-201|LINC01375|1860|	0.102615	0.0166085	0.132036
ENST00000662953.1|ENSG00000225964.6|OTTHUMG00000151730.2|OTTHUMT00000524462.1|NRIR-203|NRIR|2055|	0.102541	0.0166695	0.132453
ENST00000667541.1|ENSG00000287181.1|OTTHUMG00000195490.1|OTTHUMT00000527190.1|ENST00000667541|ENSG00000287181|1745|	0.102488	0.0167132	0.132733
ENST00000659309.1|ENSG00000228127.3|OTTHUMG00000012009.10|OTTHUMT00000522018.1|LINC01649-203|LINC01649|1526|	0.102444	0.0167499	0.132933
ENST00000688501.1|ENSG00000234418.4|OTTHUMG00000157098.6|-|ENST00000688501|ENSG00000234418|2591|	0.102437	0.0167556	0.132933
ENST00000642149.1|ENSG00000232234.4|OTTHUMG00000192537.4|OTTHUMT00000495710.1|ENST00000642149|ENSG00000232234|1400|	0.102406	0.016781	0.133067
ENST00000685981.1|ENSG00000289209.1|-|-|ENST00000685981|ENSG00000289209|793|	0.102349	0.0168288	0.133279
ENST00000692011.1|ENSG00000289085.1|-|-|ENST00000692011|ENSG00000289085|1257|	0.102348	0.0168293	0.133279
ENST00000555291.1|ENSG00000258419.1|OTTHUMG00000171503.1|OTTHUMT00000413797.1|ENST00000555291|ENSG00000258419|656|	0.102343	0.0168335	0.133279
ENST00000647991.1|ENSG00000291261.1|-|OTTHUMT00000499430.1|ENST00000647991|ENSG00000291261|1926|	0.102279	0.0168873	0.133638
ENST00000427775.2|ENSG00000228772.2|OTTHUMG00000014347.2|OTTHUMT00000039994.2|ENST00000427775|ENSG00000228772|743|	0.102212	0.0169428	0.134009
ENST00000610917.1|ENSG00000273680.1|OTTHUMG00000187173.1|OTTHUMT00000474527.1|ENST00000610917|ENSG00000273680|651|	0.102192	0.0169603	0.134079
ENST00000663591.1|ENSG00000287092.1|OTTHUMG00000195482.1|OTTHUMT00000527178.1|ENST00000663591|ENSG00000287092|1470|	0.10208	0.0170544	0.134754
ENST00000653315.1|ENSG00000286709.1|OTTHUMG00000194957.1|OTTHUMT00000523417.1|ENST00000653315|ENSG00000286709|619|	0.102068	0.0170638	0.13476
ENST00000450653.2|ENSG00000235965.2|OTTHUMG00000074542.2|OTTHUMT00000158274.2|ENST00000450653|ENSG00000235965|790|	0.102009	0.0171137	0.135085
ENST00000648879.1|ENSG00000285773.1|OTTHUMG00000193316.1|OTTHUMT00000500700.1|ENST00000648879|ENSG00000285773|4177|	0.101995	0.017126	0.135097
ENST00000532961.2|ENSG00000254467.2|OTTHUMG00000166007.2|OTTHUMT00000387416.2|ENST00000532961|ENSG00000254467|2254|	0.101986	0.0171331	0.135097
ENST00000549710.1|ENSG00000257515.1|OTTHUMG00000169571.1|OTTHUMT00000404854.1|ENST00000549710|ENSG00000257515|577|	0.101977	0.0171413	0.135097
ENST00000674566.1|ENSG00000288615.1|-|-|ENST00000674566|ENSG00000288615|1050|	0.101945	0.0171682	0.135191
ENST00000663378.1|ENSG00000287135.1|OTTHUMG00000195764.1|OTTHUMT00000528635.1|ENST00000663378|ENSG00000287135|3083|	0.101942	0.0171705	0.135191
ENST00000569274.1|ENSG00000260465.1|OTTHUMG00000173475.1|OTTHUMT00000423238.1|ENST00000569274|ENSG00000260465|1790|	0.101916	0.0171928	0.135298
ENST00000518078.1|ENSG00000254050.1|OTTHUMG00000164345.1|OTTHUMT00000378351.1|ENST00000518078|ENSG00000254050|513|	0.101886	0.0172181	0.135428
ENST00000624524.1|ENSG00000279779.1|OTTHUMG00000173234.1|OTTHUMT00000422563.1|ENST00000624524|ENSG00000279779|529|	0.101872	0.0172304	0.135456
ENST00000665809.1|ENSG00000287597.1|OTTHUMG00000195525.1|OTTHUMT00000527403.1|ENST00000665809|ENSG00000287597|1929|	0.101804	0.0172883	0.135843
ENST00000662326.1|ENSG00000234142.2|OTTHUMG00000033267.3|OTTHUMT00000081457.2|LINC01675-202|LINC01675|1651|	0.10177	0.0173167	0.135997
ENST00000541092.1|ENSG00000255893.1|OTTHUMG00000167781.1|OTTHUMT00000396240.1|ENST00000541092|ENSG00000255893|581|	0.101635	0.017432	0.136834
ENST00000604692.1|ENSG00000270956.1|OTTHUMG00000185185.1|OTTHUMT00000469760.1|ENST00000604692|ENSG00000270956|675|	0.101598	0.0174643	0.137018
ENST00000627044.1|ENSG00000281721.1|OTTHUMG00000189563.1|OTTHUMT00000479972.1|LINC01080-201|LINC01080|2242|	0.101579	0.0174801	0.137073
ENST00000664543.1|ENSG00000287546.1|OTTHUMG00000194959.1|OTTHUMT00000523421.1|ENST00000664543|ENSG00000287546|2273|	0.101521	0.0175307	0.1374
ENST00000518750.1|ENSG00000253523.1|OTTHUMG00000164283.1|OTTHUMT00000378096.1|ENST00000518750|ENSG00000253523|877|	0.101407	0.0176295	0.138105
ENST00000671635.1|ENSG00000227627.5|OTTHUMG00000015856.4|OTTHUMT00000526932.1|ENST00000671635|ENSG00000227627|3246|	0.101323	0.0177024	0.138545
ENST00000409845.1|ENSG00000222017.1|OTTHUMG00000154488.1|OTTHUMT00000335479.1|ENST00000409845|ENSG00000222017|1032|	0.101321	0.0177034	0.138545
ENST00000623331.1|ENSG00000280061.1|OTTHUMG00000182315.1|OTTHUMT00000460484.1|ENST00000623331|ENSG00000280061|4103|	0.10124	0.0177748	0.139034
ENST00000702091.1|ENSG00000254377.8|OTTHUMG00000164360.5|-|MIR124-2HG-220|MIR124-2HG|1825|	0.101196	0.0178128	0.13926
ENST00000663330.1|ENSG00000259434.2|OTTHUMG00000172363.6|OTTHUMT00000418073.2|ENST00000663330|ENSG00000259434|1515|	0.101174	0.0178324	0.139343
ENST00000670718.1|ENSG00000287289.1|OTTHUMG00000195501.1|OTTHUMT00000527239.1|ENST00000670718|ENSG00000287289|2983|	0.101127	0.0178729	0.139585
ENST00000521706.1|ENSG00000254307.2|OTTHUMG00000164590.2|OTTHUMT00000379347.1|ENST00000521706|ENSG00000254307|796|	0.101118	0.0178812	0.139585
ENST00000637749.1|ENSG00000283436.1|OTTHUMG00000191869.1|OTTHUMT00000491010.1|LINC01958-201|LINC01958|1941|	0.101061	0.0179313	0.139906
ENST00000656724.1|ENSG00000286546.1|OTTHUMG00000195080.1|OTTHUMT00000524302.1|ENST00000656724|ENSG00000286546|2297|	0.10101	0.0179762	0.140185
ENST00000624036.1|ENSG00000279045.1|OTTHUMG00000167619.1|OTTHUMT00000395415.1|ENST00000624036|ENSG00000279045|666|	0.100997	0.0179878	0.140206
ENST00000624479.1|ENSG00000280227.1|OTTHUMG00000177925.1|OTTHUMT00000439766.1|ENST00000624479|ENSG00000280227|549|	0.100976	0.0180066	0.14022
ENST00000423153.1|ENSG00000233415.1|OTTHUMG00000032470.1|OTTHUMT00000079228.1|ENST00000423153|ENSG00000233415|640|	0.100965	0.0180161	0.14022
ENST00000563225.2|ENSG00000261211.2|OTTHUMG00000175893.1|OTTHUMT00000431245.1|ENST00000563225|ENSG00000261211|6640|	0.100964	0.0180166	0.14022
ENST00000606778.1|ENSG00000271930.1|OTTHUMG00000185510.1|OTTHUMT00000470622.1|ENST00000606778|ENSG00000271930|504|	0.100926	0.0180501	0.14041
[truncated: 13,551 more rows]
