# Supplementary material
Source: HighWire-hosted journal article supplement (doi:10.1101/rna.080188.124)
Supplement: Supplemental_Table_S2.xlsx [file Supplemental_Table_S2.xlsx]

## Sheet: Table_S2_Legend
Transcipt / Gene ID	transcript/gene IDs and transcript length from GENCODE v43 GTF
Length	transcript length in kb
Rep.A	# of significant hits to XIST Repeat A
Rep.F	# of significant hits to XIST Repeat F region
Rep.B1	# of significant hits to XIST Repeat B1
Rep.B2	# of significant hits to XIST Repeat B2
Rep.D	# of significant hits to XIST Repeat D
Rep.E	# of significant hits to XIST Repeat E
SUM	SUM of hits to XIST repeats
SUM_per_kb	SUM of hits to XIST repeats divided by length in kb
K_tot_1	total RNA-Seq TPM from K562, replicate 1
K_tot_2	total RNA-Seq TPM from K562, replicate 2
K_nuc_1	nucleoplasmic RNA-Seq TPM from K562, replicate 1
K_nuc_2	nucleoplasmic RNA-Seq TPM from K562, replicate 2
K_chrom_1	chromatin RNA-Seq TPM from K562, replicate 1
K_chrom_2	chromatin RNA-Seq TPM from K562, replicate 2
K_cyt_1	cytoplasmic RNA-Seq TPM from K562, replicate 1
K_cyt_2	cytoplasmic RNA-Seq TPM from K562, replicate 1
K_bru0_1	Bru-Seq TPM from K562, replicate 1
K_bru0_2	Bru-Seq TPM from K562, replicate 2
K_bru2_1	Bru-Chase 2hr TPM from K562, replicate 1
K_bru2_2	Bru-Chase 2hr TPM from K562, replicate 2
K_bru6_1	Bru-Chase 6hr TPM from K562, replicate 1
K_bru6_2	Bru-Chase 2hr TPM from K562, replicate 2
H_tot_1	total RNA-Seq TPM from HepG2, replicate 1
H_tot_2	total RNA-Seq TPM from HepG2, replicate 2
H_bru0_1	Bru-Seq TPM from HepG2, replicate 1
H_bru0_2	Bru-Seq TPM from HepG2, replicate 2
H_bru2_1	Bru-Chase 2hr TPM from HepG2, replicate 1
H_bru2_2	Bru-Chase 2hr TPM from HepG2, replicate 2
H_bru6_1	Bru-Chase 6hr TPM from HepG2, replicate 1
H_bru6_2	Bru-Chase 6hr TPM from HepG2, replicate 2

## Sheet: Table_S2_v43_lncRNA_ABDEF_count
Transcipt / Gene ID	length	Rep.A	Rep.F	Rep.B1	Rep.B2	Rep.D	Rep.E	SUM	SUM_per_kb	K_tot_1	K_tot_2	K_nuc_1	K_nuc_2	K_chrom_1	K_chrom_2	K_cyt_1	K_cyt_2	K_bru0_1	K_bru0_2	K_bru2_1	K_bru2_2	K_bru6_1	K_bru6_2	H_tot_1	H_tot_2	H_bru0_1	H_bru0_2	H_bru2_1	H_bru2_2	H_bru6_1	H_bru6_2
ENST00000626826.1|ENSG00000281344.1|OTTHUMG00000189570.1|OTTHUMT00000479989.1|HELLPAR-201|HELLPAR|205012	205.012	16	3	0	0	2	137	158	0.770687	0.141124	0.0934875	0.451333	0.976104	3.34111	0.569017	0.0118878	0.00478819	1.51656	1.9619	2.70024	2.17297	1.93255	1.76685	0.128002	0.0695448	1.43259	0.678051	1.42905	1.35633	0.488647	0.437153
ENST00000624628.1|ENSG00000279072.1|OTTHUMG00000189377.1|OTTHUMT00000479517.1|ENST00000624628|ENSG00000279072|24137	24.137	0	0	0	35	0	0	35	1.45006	0.00318814	0	0	0.00432214	0	0.00778046	0	0.00128836	0.00618311	0.0119355	0.0106883	0	0.0047629	0.0165235	0.0010751	0.00229931	0	0	0.00714453	0	0	0
ENST00000429829.6|ENSG00000229807.13|OTTHUMG00000021839.13|OTTHUMT00000057239.2|XIST-204|XIST|19245	19.245	3	3	1	1	12	14	34	1.76669	5.49878	4.16144	68.1554	94.886	643.069	164.535	1.14889	0.403035	31.6345	26.6169	32.552	28.332	57.3138	49.9351	0.000871742	0	0.258836	0.44053	0.0476497	0.209167	0.0818528	0.0162453
ENST00000501122.2|ENSG00000245532.11|OTTHUMG00000166321.8|OTTHUMT00000389142.3|NEAT1-202|NEAT1|22743	22.743	2	5	0	0	1	20	28	1.23115	4.12593	3.5134	120.521	204.677	1349.58	418.723	5.31223	2.42143	159.921	160.89	36.4654	54.1325	70.3062	73.7748	6.624	7.38677	201.102	210.003	106.296	182.217	147.892	302.035
ENST00000623075.1|ENSG00000280383.1|OTTHUMG00000189269.1|OTTHUMT00000479250.1|ENST00000623075|ENSG00000280383|23112	23.112	3	0	3	3	0	16	25	1.08169	0.00322314	0.0121212	0.0080497	0.0423869	0.0875349	0.0137462	0.0885764	0.108201	0.296554	0.41095	0.230272	0.106967	0.125	0.186567	0.0349737	0.00771333	0.289188	0.179903	0.14106	0.119614	0.0284509	0.10986
ENST00000568752.1|ENSG00000261200.1|OTTHUMG00000176465.1|OTTHUMT00000432131.1|ENST00000568752|ENSG00000261200|3971	3.971	5	0	0	3	5	5	18	4.53286	0	0	0.0495459	0.334119	0.392268	0.0986333	0.00691026	0.00350918	0.0265025	0	0	0.0254569	0	0.0201461	0	0	0	0	0	0	0.0178117	0
ENST00000587762.2|ENSG00000267519.6|OTTHUMG00000181848.2|OTTHUMT00000457941.2|MIR23AHG-201|MIR23AHG|19049	19.049	2	1	5	6	0	2	16	0.839939	0.70645	0.793292	2.26074	2.34145	9.58413	16.0666	1.38795	1.2806	15.7587	7.96981	2.02978	2.18265	0.866874	1.24132	0.125234	0.00867931	1.83907	2.13932	0.221987	0.446935	0.161443	0.301443
ENST00000458178.2|ENSG00000224086.6|OTTHUMG00000153510.3|OTTHUMT00000331447.2|PPM1F-AS1-201|PPM1F-AS1|37852	37.852	1	0	2	8	1	2	14	0.369862	0	0	0	0	0	0	0	0	0	0	0	0	0	0	0	0	0	0	0	0.00336174	0	0
ENST00000597346.1|ENSG00000269821.1|OTTHUMG00000171022.2|OTTHUMT00000411275.2|KCNQ1OT1-201|KCNQ1OT1|91667	91.667	1	2	2	6	1	2	14	0.152727	0.837059	0.748749	8.23562	12.9563	57.129	26.6053	0.118059	0.0499105	9.70644	7.00543	2.73645	3.72982	1.88973	4.27834	13.8213	2.41646	69.2399	62.5329	42.9187	47.0795	4.66228	3.96206
ENST00000609439.2|ENSG00000291208.1|-|OTTHUMT00000488441.1|ENST00000609439|ENSG00000291208|10247	10.247	1	0	1	12	0	0	14	1.36625	0.0964968	0.0466689	0.690334	0.820912	2.61997	4.23212	0.30481	0.275408	0.939714	0.897918	0.729309	0.877172	1.10211	0.930272	0.0518385	0.0326109	0.648917	0.457776	0.940769	0.741658	0.752035	0.697026
ENST00000624209.1|ENSG00000279036.1|OTTHUMG00000177920.1|OTTHUMT00000439715.1|ENST00000624209|ENSG00000279036|3578	3.578	3	0	5	5	0	1	14	3.9128	0	0	0	0	0	0	0	0	0	0	0	0	0	0	0	0	0	0	0	0	0	0
ENST00000648200.2|ENSG00000203930.13|OTTHUMG00000022548.18|OTTHUMT00000498173.3|LINC00632-210|LINC00632|21234	21.234	1	0	0	0	1	12	14	0.65932	0	0	0	0	0	0	0.000600708	0	0.00299082	0.00191621	0	0.0115167	0	0.000828988	0	0	0	0	0	0.0028719	0.00200669	0.00164899
ENST00000604411.1|ENSG00000270641.2|OTTHUMG00000184725.1|OTTHUMT00000469120.1|TSIX-201|TSIX|37027	37.027	1	4	1	0	0	6	12	0.324088	0.00519721	0.00176739	0.0300222	0.0343209	0.427822	0.106562	0	0	0.00258973	0	0.0628789	0.0272921	0.0154489	0.0137437	0.000609549	0	0	0	0	0.00326875	0	0.00141071
ENST00000605862.6|ENSG00000242588.7|OTTHUMG00000189725.4|OTTHUMT00000481525.3|ENST00000605862|ENSG00000242588|17286	17.286	1	0	2	7	0	2	12	0.694203	2.74201	2.37047	8.11464	8.77374	82.3503	57.0541	1.49363	1.75347	11.5243	11.4046	10.2191	10.7399	17.317	16.2483	1.43336	1.25311	6.10737	4.78589	7.12209	8.91751	6.46733	9.52337
ENST00000610177.1|ENSG00000273142.1|OTTHUMG00000186265.1|OTTHUMT00000472525.1|LINC02604-201|LINC02604|3441	3.441	2	0	0	6	0	3	11	3.19675	0.0919205	0.0790244	3.72165	5.05627	24.7546	20.9441	1.1412	1.51599	5.81719	5.94357	3.33889	4.24539	5.57954	4.42456	0.0612722	0	2.01804	2.43108	2.68403	2.51869	3.07636	3.57281
ENST00000624919.1|ENSG00000280434.1|OTTHUMG00000189193.1|OTTHUMT00000479016.1|ENST00000624919|ENSG00000280434|14262	14.262	1	2	0	4	0	4	11	0.77128	0	0	0.42026	1.35072	0.493464	1.87686	0.0112994	0	0.400403	0.693879	0.242037	0.740794	0.100791	0.326682	0	0	0	0	0	0	0	0.00199569
ENST00000635449.1|ENSG00000282961.1|OTTHUMG00000191472.1|OTTHUMT00000488007.1|PRNCR1-201|PRNCR1|12727	12.727	0	1	0	0	0	10	11	0.864304	0	0	0.00470977	0.0257311	0.15908	0	0.00213067	0	0	0	0	0	0	0.00774046	0.000583709	0	0	0	0.0159265	0.00343987	0.00600296	0.0346329
ENST00000671643.1|ENSG00000286288.2|OTTHUMG00000031681.10|OTTHUMT00000525444.1|ENST00000671643|ENSG00000286288|4575	4.575	2	0	4	1	2	2	11	2.40437	0	0	0	0.00597759	0	0	0	0	0	0	0	0	0	0.00826349	0	0	0	0	0	0	0	0
ENST00000506640.3|ENSG00000291215.1|-|OTTHUMT00000006889.2|ENST00000506640|ENSG00000291215|6469	6.469	2	0	1	7	0	0	10	1.54583	0.260374	0.236059	4.40926	4.17429	24.7892	26.1701	0.716054	0.933114	6.01331	5.32651	3.32848	3.66472	4.38776	3.88726	0.233214	0.138782	3.13979	2.31486	1.71704	1.81221	1.72692	2.07595
ENST00000622550.2|ENSG00000290535.1|-|OTTHUMT00000488436.1|ENST00000622550|ENSG00000290535|7213	7.213	1	0	2	7	0	0	10	1.38639	0.0986055	0.0689729	0.779773	0.969253	4.31682	3.95782	0.122947	0.167515	0.849891	0.753576	0.676051	0.830028	0.822974	0.928806	0.0813277	0.107888	0.491198	0.173116	0.46052	0.390959	0.45697	0.37826
ENST00000657488.1|ENSG00000286379.1|OTTHUMG00000195834.1|OTTHUMT00000528963.1|ENST00000657488|ENSG00000286379|4878	4.878	0	0	6	2	0	2	10	2.05002	0.0640186	0	0.599216	1.63645	4.9957	3.22451	0.150823	0.0394409	0.872145	0.431393	0.38148	1.01981	0.708404	0.85312	3.8e-08	0	0.290341	0.177554	0.138691	0	0.239258	0.173024
ENST00000665286.1|ENSG00000287431.1|OTTHUMG00000186721.2|OTTHUMT00000473669.2|RENO1-201|RENO1|6784	6.784	4	0	4	1	1	0	10	1.47406	0.336569	0.348251	0.723301	0.621835	4.93916	5.25543	0.244188	0.521859	11.5166	8.49825	2.40926	3.1603	0.989303	1.76859	0.158339	0.0247589	8.89577	4.49753	0.504849	0.62797	0.325168	0.395608
ENST00000562952.1|ENSG00000261654.1|OTTHUMG00000175996.1|OTTHUMT00000431363.1|ENST00000562952|ENSG00000261654|5985	5.985	0	0	0	0	0	9	9	1.50376	0.363175	0.156129	0.563457	0.711979	7.52409	0.660422	0.149758	0.0227071	8.8361	9.70807	4.27002	8.8432	5.17698	8.48588	0.168595	0.112637	3.67142	3.21236	2.77318	3.17217	1.62292	2.25149
ENST00000577309.1|ENSG00000265043.1|OTTHUMG00000175986.2|OTTHUMT00000431348.2|ENST00000577309|ENSG00000265043|3703	3.703	0	0	1	2	3	3	9	2.43046	0	0	0	0	0	0	0	0	0	0	0	0	0	0	0	0	0	0	0	0	0	0
ENST00000577684.1|ENSG00000220161.4|OTTHUMG00000179643.1|OTTHUMT00000447480.1|LINC02076-201|LINC02076|1871	1.871	2	0	2	2	1	2	9	4.81026	0	0.0188572	0	0	0	0	0	0	0	0	0	0	0	0.0489658	0	0	0	0	0	0	0	0
ENST00000583516.1|ENSG00000265992.1|OTTHUMG00000179678.1|OTTHUMT00000447578.1|ESRG-201|ESRG|3140	3.14	1	0	3	2	0	3	9	2.86624	0	0	0	0.116796	0.0546993	0	0.0381693	0.00196324	0	0	0	0	0	0	0	0	0	0	0.0227647	0	0	0.0563672
ENST00000653822.1|ENSG00000227392.3|OTTHUMG00000182475.3|OTTHUMT00000526100.1|HPN-AS1-202|HPN-AS1|3318	3.318	0	0	3	2	2	2	9	2.71248	NA	NA	NA	NA	NA	NA	NA	NA	NA	NA	NA	NA	NA	NA	NA	NA	NA	NA	NA	NA	NA	NA
ENST00000392097.5|ENSG00000213062.5|OTTHUMG00000186558.2|OTTHUMT00000473347.2|ENST00000392097|ENSG00000213062|14107	14.107	1	0	0	0	0	7	8	0.567094	0.375942	0.392561	0.631359	0.746348	3.79333	0.999248	0.878341	0.389812	2.60544	2.58442	0.805929	1.28895	0.623069	1.24618	0.471878	0.50929	3.59806	2.7045	1.93492	1.91632	0.631836	0.616975
ENST00000430027.3|ENSG00000231764.11|OTTHUMG00000154198.11|OTTHUMT00000334364.3|DLX6-AS1-201|DLX6-AS1|15364	15.364	0	0	0	0	0	8	8	0.520698	0	0	0	0	0	0	0	0	0	0	0	0	0	0	0	0	0	0	0	1.07964	0.290589	0.986458
ENST00000485071.2|ENSG00000274272.1|OTTHUMG00000187473.1|OTTHUMT00000475053.1|ENST00000485071|ENSG00000274272|4401	4.401	1	0	3	4	0	0	8	1.81777	0.292257	0.290751	2.98056	3.92027	11.3115	23.3535	0.329627	0.595627	1.66871	1.28148	0.857148	0.681464	2.7438	1.39732	0	0.0153251	0	0	0.173606	0.187333	0.444008	0.500141
ENST00000561746.1|ENSG00000261098.1|OTTHUMG00000172986.1|OTTHUMT00000421595.1|ENST00000561746|ENSG00000261098|4140	4.14	2	0	0	0	0	6	8	1.93237	0.601105	0.481013	3.69947	7.64786	28.0453	4.27328	0.669102	0.194625	8.95897	8.09476	9.21426	12.2988	5.58058	9.002	1.02687	0.797249	13.1175	12.5499	9.82728	9.98356	3.17195	4.20069
ENST00000617901.1|ENSG00000277151.1|OTTHUMG00000187329.1|OTTHUMT00000474773.1|ENST00000617901|ENSG00000277151|5305	5.305	1	0	0	0	0	7	8	1.50801	0.154131	0.100968	0.574132	0.968678	4.20123	0.709108	0.058005	0.0335126	8.34097	10.0923	2.59606	6.31877	1.2174	3.21134	0.286342	0.0637726	15.9003	12.0617	2.89783	3.7573	1.05302	2.04853
ENST00000640557.1|ENSG00000283849.1|OTTHUMG00000191918.1|OTTHUMT00000491120.1|ENST00000640557|ENSG00000283849|1818	1.818	0	0	4	4	0	0	8	4.40044	0.0184316	0.0536734	0.123901	0.199916	0.0174384	0.269288	0.00367846	0.0366495	0.166814	0.0675381	0.0712158	0.0925722	0.0170254	0	0.0432111	0.0589921	0.533021	0.874321	0.0417523	0	0	0.0611878
ENST00000652994.1|ENSG00000288049.1|OTTHUMG00000193885.1|OTTHUMT00000506175.1|ENST00000652994|ENSG00000288049|5625	5.625	0	0	0	0	0	8	8	1.42222	0	0	0	0	0	0	0	0	0.0181273	0	0	0	0	0.00627591	0.122511	0.0643259	0.0966329	0	0.193367	0.138257	0.205396	0.130388
ENST00000663028.1|ENSG00000286473.1|OTTHUMG00000195348.1|OTTHUMT00000526484.1|ENST00000663028|ENSG00000286473|6197	6.197	1	0	0	0	0	7	8	1.29095	0.0317269	0.0209725	0.115074	0.213826	0.537597	0.17065	0.12408	0.0131363	0	0.375089	0	0	0	0	0	0	0.697086	0	0	0	0	0
ENST00000665400.1|ENSG00000231881.2|OTTHUMG00000014754.2|OTTHUMT00000504949.1|ENST00000665400|ENSG00000231881|25672	25.672	0	0	1	5	0	2	8	0.311624	0	0.00218063	0	0	0	0	0.00196108	0	0.0216184	0	0.00255589	0	0	0	0.00262232	0	0	0	0	0	0.00248097	0.00204083
ENST00000422216.1|ENSG00000226252.1|OTTHUMG00000007844.1|OTTHUMT00000021634.1|ENST00000422216|ENSG00000226252|4036	4.036	1	0	3	2	0	1	7	1.73439	0.0875983	0.0334719	0.0855194	0.0871781	0.347027	0.1434	0.00267556	0.0206909	0.468538	0.431189	0.0177826	0.0750046	0	0.0197857	0	0	0	0	0	0	0	0
ENST00000433168.6|ENSG00000290920.1|-|OTTHUMT00000319398.1|ENST00000433168|ENSG00000290920|2310	2.31	1	0	2	3	1	0	7	3.0303	NA	NA	NA	NA	NA	NA	NA	NA	NA	NA	NA	NA	NA	NA	NA	NA	NA	NA	NA	NA	NA	NA
ENST00000441399.3|ENSG00000232160.7|OTTHUMG00000022425.4|OTTHUMT00000058317.2|RAP2C-AS1-202|RAP2C-AS1|3771	3.771	1	0	1	1	0	4	7	1.85627	0.047921	0.0494854	0.066284	0	0	0.0849685	0.14802	0.10333	0.376052	0.00487555	0.0995868	0.178367	0.358166	0.353878	0	0	0	0.0917603	0	0	0.0433394	0.138138
ENST00000562262.1|ENSG00000260599.1|OTTHUMG00000175727.1|OTTHUMT00000430906.1|ENST00000562262|ENSG00000260599|3355	3.355	1	0	0	0	0	6	7	2.08644	0	0	0	0	0	0	0	0	0	0	0	0	0	0	0	0	0	0	0	0	0	0
ENST00000562284.1|ENSG00000260918.1|OTTHUMG00000175912.2|OTTHUMT00000431265.2|ENST00000562284|ENSG00000260918|7000	7	0	0	0	0	1	6	7	1	0	0	0.00689972	0.00501754	0.039201	0	0	0	0	0.0366183	0	0.0550781	0.00854489	0.0544802	0	0	0	0	0	0	0	0
ENST00000572067.1|ENSG00000263126.1|OTTHUMG00000177492.1|OTTHUMT00000437175.1|ENST00000572067|ENSG00000263126|3907	3.907	1	0	2	2	1	1	7	1.79166	0.107514	0.103326	1.32762	1.47285	7.10002	7.12721	0.306548	0.156788	0.951454	0.864468	0.274967	0.170464	0.273303	0.319062	0.177961	0.190905	1.15262	0.983274	0.370974	0.427319	0.231502	0.496075
ENST00000586064.3|ENSG00000267629.3|OTTHUMG00000182219.3|OTTHUMT00000460115.3|ENST00000586064|ENSG00000267629|5409	5.409	1	0	3	2	0	1	7	1.29414	0	0	0	0	0	0	0	0	0	0	0	0	0	0	0.0147436	0	0	0.0433671	0	0.058991	0.0184521	0
ENST00000588701.2|ENSG00000266998.2|OTTHUMG00000177710.1|OTTHUMT00000438616.1|ENST00000588701|ENSG00000266998|3420	3.42	0	0	3	3	1	0	7	2.04678	0.0115637	0	0.014547	0.0211607	0.0413192	0.0592164	0.00320008	0	0.0626473	0	0.0214149	0	0.0186029	0.0238255	0.0616676	0	0.307898	0.263637	0.0412654	0.0198141	0	0.0170503
ENST00000609510.1|ENSG00000273295.1|OTTHUMG00000150777.2|OTTHUMT00000320041.2|ENST00000609510|ENSG00000273295|5637	5.637	0	0	0	3	1	3	7	1.2418	0.0647249	0.0404315	2.71774	4.6011	13.4401	11.1854	0.0400279	0.127207	1.14301	0.0073617	1.15843	0.832664	0.669537	0.815144	0.0782108	0.136638	0.300421	0	1.80953	2.25338	0.887901	2.08642
ENST00000611744.1|ENSG00000275880.1|OTTHUMG00000187271.1|OTTHUMT00000474675.1|ENST00000611744|ENSG00000275880|3272	3.272	2	0	3	2	0	0	7	2.13936	0.0121647	0.0476253	0.0686048	0.0776208	0.129947	0.268994	0.0370121	0.125528	0.329328	0.629136	0.0225201	0.0949736	0.0195544	0.125273	0.0502493	0.0175887	1.23055	0.792238	0.0651219	0.0833412	0.0660642	0.197821
ENST00000612722.1|ENSG00000275620.1|OTTHUMG00000187005.1|OTTHUMT00000474230.1|FLJ16779-201|FLJ16779|7638	7.638	0	0	2	4	0	1	7	0.91647	0	0	0	0	0	0	0	0	0	0	0	0	0	0	0	0.00730954	0.0256355	0	0	0.00836832	0	0.0213653
ENST00000620864.1|ENSG00000196167.10|OTTHUMG00000166658.3|OTTHUMT00000390999.2|COLCA1-205|COLCA1|8098	8.098	1	0	0	0	1	5	7	0.864411	0	0	0	0	0	0	0	0	0.0246466	0.0628124	0	0	0.00732948	0.0343117	0.416573	0.334503	4.26922	3.68124	0.47244	0.467992	0.288743	0.292441
ENST00000623414.1|ENSG00000279569.1|OTTHUMG00000177024.1|OTTHUMT00000434930.1|ENST00000623414|ENSG00000279569|4170	4.17	0	0	3	4	0	0	7	1.67866	0.00940913	0.016179	0.00590287	0	0	0.128027	0	0.00665947	0	0	0	0	0	0.0572456	0.0445474	0.0545706	0.0492909	0.0301445	0	0.015872	0.0669472	0.04099
ENST00000623833.1|ENSG00000279717.1|OTTHUMG00000186034.1|OTTHUMT00000472098.1|ENST00000623833|ENSG00000279717|2679	2.679	2	0	0	0	0	5	7	2.61292	0.298898	0.154165	0.0377553	0.0549256	0.911474	0.153932	0.10469	0	0.124406	0.475011	0	0	0.0983804	0.221077	0	0	0	0	0.0274316	0	0.166935	0
ENST00000624029.1|ENSG00000280347.1|OTTHUMG00000066284.1|OTTHUMT00000141831.1|ENST00000624029|ENSG00000280347|4975	4.975	1	0	0	0	0	6	7	1.40704	0.870478	0.539034	7.60702	16.0922	47.8434	6.06616	1.99927	0.859968	30.4616	32.9264	57.3409	52.0069	53.3055	63.9808	0.322209	0.864061	10.6348	10.031	10.1162	15.4817	5.54627	8.43696
ENST00000624409.1|ENSG00000279207.1|OTTHUMG00000178784.2|OTTHUMT00000443340.2|ENST00000624409|ENSG00000279207|5808	5.808	1	0	0	0	0	6	7	1.20523	0.902681	0.730264	0.893877	1.53155	4.21396	1.83437	1.87098	0.670211	4.51886	4.95786	7.08711	8.47015	9.22247	10.094	0.73897	1.49087	2.16273	3.54775	3.09708	5.39938	2.18853	5.14577
ENST00000630918.1|ENSG00000281591.1|OTTHUMG00000189731.1|OTTHUMT00000481584.1|DBET-201|DBET|3363	3.363	1	0	3	3	0	0	7	2.08147	0	0	0.0224904	0.0655148	0.130879	0.224136	0	0	0	0	0	0	0	0	0.00697413	0	0	0	0	0	0	0
ENST00000634862.1|ENSG00000290937.1|-|OTTHUMT00000488454.1|ENST00000634862|ENSG00000290937|6083	6.083	0	0	2	5	0	0	7	1.15075	0.0777579	0.0535738	2.54472	3.02311	7.73107	13.8892	0.312841	0.389673	1.51797	1.06191	0.778535	1.28811	1.46038	1.72199	0	0.0111012	0	0.0200662	0	0.0119394	0.023012	0.0444216
ENST00000641469.1|ENSG00000290814.1|-|OTTHUMT00000493510.1|ENST00000641469|ENSG00000290814|4627	4.627	1	0	0	1	0	5	7	1.51286	0	0	0	0	0	0	0	0	0	0	0	0	0.0133177	0	0	0	0	0	0	0	0	0
ENST00000647176.1|ENSG00000290770.1|-|OTTHUMT00000494217.1|MFSD14CP-209|MFSD14CP|9746	9.746	1	1	0	0	1	4	7	0.718243	1.94337	1.36164	3.19321	5.65193	16.2435	5.81901	4.31788	2.70191	2.7579	2.41452	2.10438	1.98565	3.47861	3.35896	0.379143	0.541519	1.04693	1.79411	1.66077	3.01169	1.74259	2.00429
ENST00000647856.1|ENSG00000285796.1|OTTHUMG00000192646.1|OTTHUMT00000498291.1|ENST00000647856|ENSG00000285796|8538	8.538	2	0	1	1	0	3	7	0.819864	0.308441	0.376567	0.728896	0.860271	1.86567	3.39492	0.107124	0.112958	1.94852	1.58957	0.111159	0.18983	0.0901451	0.141377	1.92915	0.626539	20.5851	12.1969	0.973863	0.874947	0.656413	0.823512
ENST00000647925.1|ENSG00000285852.1|OTTHUMG00000192942.2|OTTHUMT00000499648.2|ENST00000647925|ENSG00000285852|2349	2.349	3	0	1	2	0	1	7	2.97999	0	0	0	0	0	0	0.0566587	0	0	0	0	0	0	0	0	0	0	0	0	0	0	0
ENST00000661161.1|ENSG00000225793.5|OTTHUMG00000015048.4|OTTHUMT00000527482.1|TMEM30A-DT-207|TMEM30A-DT|5454	5.454	2	1	0	0	0	4	7	1.28346	0	0	0	0	0	0	0	0	0	0	0	0	0	0	0	0	0	0	0	0	0	0
ENST00000667505.1|ENSG00000250241.7|OTTHUMG00000161299.3|OTTHUMT00000364454.2|PCDH10-DT-211|PCDH10-DT|8044	8.044	0	0	0	0	0	7	7	0.870214	0	0.00782385	0.0114935	0	0.0269866	0	0.00228383	0	0	0	0	0	0.00514588	0.00964884	0	0	0	0	0.00810195	0	0	0
ENST00000415801.1|ENSG00000226237.4|OTTHUMG00000020143.3|OTTHUMT00000052930.1|GAS1RR-201|GAS1RR|4387	4.387	0	0	0	0	0	6	6	1.36768	0	0.0153667	0	0	0	0	0	0	0	0	0	0	0	0	0	0	0	0	0	0	0	0
ENST00000425493.1|ENSG00000229311.1|OTTHUMG00000067212.1|OTTHUMT00000143910.1|ENST00000425493|ENSG00000229311|3614	3.614	0	0	0	0	1	5	6	1.66021	0	0	0.000162288	0	0.0389787	0	0	0	0	0	0.0402412	0.0565733	0.00174883	0.044772	0	0	0	0	0	0	0	0
ENST00000435411.6|ENSG00000234663.7|OTTHUMG00000154205.10|OTTHUMT00000334384.3|LINC01934-205|LINC01934|11533	11.533	0	0	0	0	0	6	6	0.520246	0	0	0	0	0	0	0	0	0	0.0172219	0	0	0	0	0	0	0	0	0	0	0	0
ENST00000447086.2|ENSG00000236529.2|OTTHUMG00000156742.2|OTTHUMT00000345547.2|ENST00000447086|ENSG00000236529|2342	2.342	0	0	1	4	0	1	6	2.56191	0.0344742	0	0.600429	0.937075	3.78255	3.32692	0.657623	0.345361	0.778108	0.927935	0.866543	1.12409	0.835679	0.815573	0.061481	0.0251104	0.287909	0.998018	0.516277	0.431406	0.163606	0.185413
ENST00000501931.1|ENSG00000246877.2|OTTHUMG00000177189.1|OTTHUMT00000435768.1|DNM1P35-201|DNM1P35|3188	3.188	2	0	1	2	0	1	6	1.88206	0	0	0	0	0	0	0	0	0	0	0	0	0	0	0	0	0	0	0	0	0	0
ENST00000530045.5|ENSG00000255234.6|OTTHUMG00000167091.2|OTTHUMT00000393076.1|CCDC90B-AS1-201|CCDC90B-AS1|2643	2.643	1	0	2	1	2	0	6	2.27015	0	0	0	0	0	0.0966388	0.0060397	0.0525872	0	0	0.0288475	0	0	0	0	0	0	0.207319	0.200381	0	0.0801855	0.10273
ENST00000550290.2|ENSG00000257354.2|OTTHUMG00000169989.2|OTTHUMT00000406759.2|MIRLET7IHG-201|MIRLET7IHG|8693	8.693	0	0	0	0	0	6	6	0.690211	0	0	0	0	0.0526503	0	0	0	0	0	0	0.144407	0	0	0	0	0	0	0	0	0.0214892	0.276635
ENST00000559989.1|ENSG00000291211.1|-|OTTHUMT00000417043.1|ENST00000559989|ENSG00000291211|7790	7.79	0	0	1	3	0	2	6	0.770218	0.0297237	0.0258672	0.109279	0.0701559	0.646416	1.07208	0.021533	0.0741951	0.107159	0.113546	0	0.0509281	0.00770804	0.0358958	0	0	0.164484	0.202067	0.08543	0.061317	0.00674653	0.0348771
ENST00000560255.2|ENSG00000259642.2|OTTHUMG00000172079.2|OTTHUMT00000416730.2|ST20-AS1-201|ST20-AS1|4223	4.223	1	0	1	3	0	1	6	1.42079	0.601446	0.717243	0.547773	0.67033	0.828521	1.23232	0.667995	1.41277	5.99743	6.34207	0.457396	0.87978	0.560509	0.658599	0.771613	0.761285	3.50809	2.37801	1.78904	1.27439	0.80865	0.74108
ENST00000563417.1|ENSG00000260505.1|OTTHUMG00000176320.1|OTTHUMT00000431758.1|ENST00000563417|ENSG00000260505|2912	2.912	1	0	0	0	0	5	6	2.06044	0	0	0	0	0	0	0	0	0	0	0	0	0	0	0	0	0	0	0	0	0	0
ENST00000564121.1|ENSG00000260163.1|OTTHUMG00000176163.1|OTTHUMT00000431586.1|ENST00000564121|ENSG00000260163|4476	4.476	1	0	1	1	1	2	6	1.34048	0	0	0	0	0	0	0	0	0	0	0	0	0	0	0	0	0	0	0	0	0	0
ENST00000565493.2|ENSG00000260032.2|OTTHUMG00000175580.2|OTTHUMT00000430538.2|NORAD-201|NORAD|5401	5.401	0	4	1	0	0	1	6	1.11091	98.1573	87.9291	32.5959	82.3784	92.6313	33.8707	45.2399	44.0526	219.433	223.022	172.959	180.779	358.159	280.406	148.42	222.135	515.691	451.248	571.661	611.151	1014.67	1068.5
ENST00000566193.1|ENSG00000260197.1|OTTHUMG00000175431.1|OTTHUMT00000429943.1|ENST00000566193|ENSG00000260197|2666	2.666	1	0	0	0	0	5	6	2.25056	0	0	0	0	0	0	0	0	0	0	0	0	0	0.0317638	0.115943	0.0655632	5.25928	3.56884	3.39371	4.41015	1.56711	1.83948
ENST00000574616.2|ENSG00000263244.2|OTTHUMG00000178148.2|OTTHUMT00000440762.2|ENST00000574616|ENSG00000263244|8334	8.334	0	0	0	0	0	6	6	0.719942	20.2	17.4702	11.4458	21.527	49.131	15.8091	9.93802	4.89533	0.418484	4.58779	44.552	63.697	66.7506	87.3594	33.4631	57.0541	7.52933	29.6412	75.3444	68.7547	127.32	121.044
ENST00000575331.1|ENSG00000272884.1|OTTHUMG00000186449.1|OTTHUMT00000473168.1|ENST00000575331|ENSG00000272884|5553	5.553	0	0	2	3	1	0	6	1.0805	0	0.0178796	0.0533237	0	0	0.158339	0	0	0.0606981	0	0.0687319	0.212308	0.214411	0	0.0281568	0.00613707	0	0	0	0	0	0.0552612
ENST00000584382.1|ENSG00000266371.1|OTTHUMG00000179255.1|OTTHUMT00000445477.1|ENST00000584382|ENSG00000266371|2780	2.78	0	0	0	0	1	5	6	2.15827	0	0	0	0	1.0618	0	0.0117717	0	0	0	1.13e-07	1.63875	0.640395	0.366499	0	0	0	0	0.749223	0.525912	0.906772	1.17011
ENST00000584509.2|ENSG00000264964.2|OTTHUMG00000179109.2|OTTHUMT00000444790.2|TWSG1-DT-201|TWSG1-DT|5142	5.142	0	0	0	0	1	5	6	1.16686	0.00565129	0.00619387	0.0281914	0	0	0	0.0265526	0	0	0	0	0	0.0177309	0	0	0.0151927	0	0.126027	0.0227677	0	0.0578553	3.4e-09
ENST00000587534.1|ENSG00000233175.2|OTTHUMG00000180197.1|OTTHUMT00000450209.1|FMNL1-AS1-202|FMNL1-AS1|2003	2.003	0	0	2	2	1	1	6	2.99551	0.116755	0.0270604	0	8.72e-08	0.764638	4.61e-06	0.161385	0.169993	0	0	0.182633	0	0	0	0	0	0.116414	0	0	0	0.119291	0.0320696
ENST00000601203.1|ENSG00000268257.2|OTTHUMG00000183173.2|OTTHUMT00000465461.2|AIRN-201|AIRN|4374	4.374	0	0	3	2	0	1	6	1.37174	0	0	0	0	0.0318999	0	0	0	0	0	0	0	0	0	0	0	0	0	0	0	0	0
ENST00000606034.1|ENSG00000272512.1|OTTHUMG00000185581.1|OTTHUMT00000470770.1|ENST00000606034|ENSG00000272512|2086	2.086	1	0	1	3	0	1	6	2.87632	0.117061	0.167697	1.32582	1.56845	4.01154	9.78792	0.0834142	0.30108	3.58253	1.28099	0.652834	0.971256	1.06039	0.683367	0.371624	0.0569216	3.98316	3.046	2.23538	1.73923	0.755466	1.61629
ENST00000610085.1|ENSG00000273314.1|OTTHUMG00000186357.1|OTTHUMT00000472997.1|ENST00000610085|ENSG00000273314|2198	2.198	1	0	2	1	1	1	6	2.72975	1.62325	2.07705	0.432891	0.544709	2.79107	1.33782	0.926876	1.41757	4.67315	4.67409	1.04412	1.26483	1.02621	0.881001	0.471842	0.457148	4.87418	1.90327	0.802605	0.732228	0.601514	0.657853
ENST00000623187.1|ENSG00000279286.2|OTTHUMG00000168701.1|OTTHUMT00000400653.1|ENST00000623187|ENSG00000279286|2828	2.828	1	0	1	2	0	2	6	2.12164	0.014115	0.0485358	0	0.0129593	0	0	0.00394294	0	0	0	0	0	0	0	0	0	0	0	0	0	0	0
ENST00000623199.1|ENSG00000279442.1|OTTHUMG00000189267.1|OTTHUMT00000479248.1|ENST00000623199|ENSG00000279442|6179	6.179	1	0	0	0	0	5	6	0.971031	0	0	0	0	0.0222959	0	0	0	0	0.020903	0	0	0	0	0	0	0	0	0.0429216	0.0310619	0	0.00891805
ENST00000623726.1|ENSG00000279738.1|OTTHUMG00000189205.1|OTTHUMT00000479036.1|ENST00000623726|ENSG00000279738|19416	19.416	0	1	0	0	0	5	6	0.309023	0.118312	0.0938441	0.906738	1.52185	3.48925	3.69258	0.0656992	0.065267	1.65405	1.52345	0.841665	0.65325	0.477138	0.517054	0.257136	0.140406	2.31913	2.24347	0.619565	0.889005	0.626762	1.0113
ENST00000624649.1|ENSG00000279453.1|OTTHUMG00000175939.1|OTTHUMT00000431293.1|ENST00000624649|ENSG00000279453|2435	2.435	1	0	0	0	1	4	6	2.46407	1.24029	0.867132	1.16158	1.85738	5.61228	1.28092	1.68272	0.76308	9.19096	15.4731	7.1237	13.1847	7.56617	10.7186	0.5503	0.529774	18.2201	24.8996	6.18486	9.14534	8.20691	11.0475
ENST00000624650.1|ENSG00000279394.1|OTTHUMG00000176725.1|OTTHUMT00000433310.1|ENST00000624650|ENSG00000279394|2260	2.26	1	0	0	0	0	5	6	2.65487	0	0	0.373678	0.193903	1.0894	0.409502	0	0	0	0.101251	0	0	0	0.061679	0	0	0	0.227826	0	0	0	0
ENST00000624952.1|ENSG00000279296.1|OTTHUMG00000177909.1|OTTHUMT00000439663.1|PRAL-201|PRAL|3286	3.286	1	1	0	1	0	3	6	1.82593	0	0	0.0517589	0.03947	0.775927	0.123587	0.0133705	0	0	0	0.0375812	0.156912	0.135952	0.0486392	0	0.0175097	0	0.0788378	0.0216009	0.0829368	0.0657406	0.0535211
ENST00000624969.1|ENSG00000280105.1|OTTHUMG00000185593.1|OTTHUMT00000470799.1|ENST00000624969|ENSG00000280105|3585	3.585	0	1	0	0	0	5	6	1.67364	0	0	0.00219128	0	0.0394624	0	0	0	0.0527064	0	0.0853671	0.101907	0.0270163	0	0	0	0.111071	0.0673083	0	0.0650879	0	0
ENST00000625039.1|ENSG00000279091.1|OTTHUMG00000172042.1|OTTHUMT00000416592.1|ENST00000625039|ENSG00000279091|7739	7.739	1	0	0	0	1	4	6	0.775294	0	0.00859367	0.0037937	0.0237973	0.0893991	0.00842158	0.0188696	0.00347429	0.064604	0.0504556	0.070524	0.0495577	0.110693	0.0392799	0.00294693	0	0	0.0463795	0.00844008	0.040766	0.0342659	0
ENST00000625192.1|ENSG00000279189.1|OTTHUMG00000167117.1|OTTHUMT00000393277.1|ENST00000625192|ENSG00000279189|5446	5.446	0	0	0	0	1	5	6	1.10173	0	0	0	0	0	0	0	0	0	0	0	0	0	0	0	0	0	0	0	0	0	0
ENST00000633881.1|ENSG00000279561.3|OTTHUMG00000191375.1|OTTHUMT00000487720.1|ENST00000633881|ENSG00000279561|4082	4.082	0	0	0	0	0	6	6	1.46987	0	0.00863156	0.0120727	0.00878029	0.231364	0	0.0318914	0.0340677	0.0771165	0.196535	0.0702407	0.024689	0.0271433	0.0976914	0.864086	1.55472	5.53724	2.71633	3.26891	2.92524	2.54885	2.0273
ENST00000641308.1|ENSG00000284669.1|OTTHUMG00000191917.1|OTTHUMT00000491119.1|ENST00000641308|ENSG00000284669|4975	4.975	0	1	2	2	1	0	6	1.20603	0.00363743	0.0115346	0	0	0	0	0	0.00391449	0.0221256	0	0	0	0	0	0	0	0	0	0	0	0	0
ENST00000646849.1|ENSG00000285108.1|OTTHUMG00000192613.1|OTTHUMT00000497281.1|ENST00000646849|ENSG00000285108|10728	10.728	0	0	0	0	0	6	6	0.559284	0.870417	0.726308	2.70774	4.3388	9.93556	6.61067	0.876363	0.469302	9.27036	5.32829	0.671816	0.946064	0.296888	0.370099	0.00851907	0	0	0	0.0288416	0	0	0.00806628
ENST00000647794.1|ENSG00000285867.1|OTTHUMG00000192833.1|OTTHUMT00000499302.1|ENST00000647794|ENSG00000285867|3176	3.176	2	0	0	0	0	4	6	1.88917	0	0	0	0	0	0.0213759	0.00346949	0	0	0	0	0	0	0	0	0	0	0	0	0	0	0
ENST00000648942.1|ENSG00000285831.1|OTTHUMG00000193379.1|OTTHUMT00000501196.1|ENST00000648942|ENSG00000285831|4355	4.355	2	0	0	0	0	4	6	1.37773	0	0	0.00467541	0	0	0	0	0	0	0	0	0	0	0	0	0	0	0	0	0.0151295	0	0
ENST00000654041.1|ENSG00000288535.1|OTTHUMG00000152143.13|OTTHUMT00000528606.1|ENST00000654041|ENSG00000288535|4039	4.039	1	0	0	0	0	5	6	1.48552	0	0	0	0	0	0	0	0	0	0	0	0	0	0	0	0	0	0	0	0	0	0
ENST00000654329.1|ENSG00000287306.1|OTTHUMG00000195183.1|OTTHUMT00000525108.1|ENST00000654329|ENSG00000287306|2923	2.923	2	1	0	0	0	3	6	2.05269	0	0	0	0	0	0	0	0	0	0	0	0	0	0	0	0	0	0	0.0225361	0.0270023	0	0
ENST00000660341.2|ENSG00000281649.3|OTTHUMG00000019910.17|OTTHUMT00000520545.1|EBLN3P-215|EBLN3P|4967	4.967	0	0	1	1	0	4	6	1.20797	NA	NA	NA	NA	NA	NA	NA	NA	NA	NA	NA	NA	NA	NA	NA	NA	NA	NA	NA	NA	NA	NA
ENST00000669986.1|ENSG00000224934.6|OTTHUMG00000018883.5|OTTHUMT00000522872.1|GOT1-DT-209|GOT1-DT|5667	5.667	1	0	0	0	0	5	6	1.05876	0.263104	0.277872	2.68595	3.04504	10.8355	6.20974	3.46698	0.849485	3.4821	4.55078	0.98449	1.47451	0.414281	1.43084	0.180272	0.0782739	3.2105	1.77705	0.3098	0.296579	0.138266	0.11192
ENST00000670831.1|ENSG00000287475.1|OTTHUMG00000195126.1|OTTHUMT00000524621.1|ENST00000670831|ENSG00000287475|3557	3.557	1	0	1	2	0	2	6	1.68681	0	0	0.0279101	0.0203505	0.0794361	0	0	0	0.0168103	0	0	0	0.017801	0	0.00657511	0	0.294029	0.190308	0.0425652	0.0486203	0.100078	0
ENST00000686658.2|ENSG00000228288.9|OTTHUMG00000041399.3|-|PCAT6-205|PCAT6|1624	1.624	1	0	2	2	0	1	6	3.69458	0.0256037	0.0358333	1.26147	1.33505	4.61994	5.59436	1.1673	1.94653	2.68579	2.2466	0.409781	0.14873	0.695571	0.355969	0.0762723	0.112285	2.25683	0.841563	0.4726	0.510216	1.33775	0.806722
ENST00000690754.2|ENSG00000289560.2|-|-|ENST00000690754|ENSG00000289560|1551	1.551	1	0	2	3	0	0	6	3.86847	0	0	0	0.0753592	0	0.141557	0	0.0101822	0.0817954	0	0	0	0	0	0.322	0.118395	1.626	1.09454	0.33025	0.415979	0.0557678	0.267614
ENST00000692035.1|ENSG00000290911.1|-|-|ENST00000692035|ENSG00000290911|4870	4.87	1	0	0	0	0	5	6	1.23203	0	0	0.0163656	0.0272224	0.0903179	0	0	0.00564423	0	0.0142672	0.101231	0.101672	0.0629859	0.0482749	0.00734879	0.0116119	0	0	0	0.00721595	0.0140993	0
ENST00000696465.1|ENSG00000289707.1|-|-|ENST00000696465|ENSG00000289707|3335	3.335	1	0	0	0	0	5	6	1.7991	0	0	0	0	0	0	0	0	0	0	0	0	0	0	0	0	0.118743	0	0	0	0	0.0126431
ENST00000378340.1|ENSG00000205015.1|OTTHUMG00000175525.1|OTTHUMT00000430369.1|LINC02138-201|LINC02138|1326	1.326	0	0	2	2	1	0	5	3.77074	0.032063	0.0324679	0	0.0317851	0	0.239321	0.0121982	0	0.10148	0	0	0	0	0	0	0	0	0	0	0	0	0
ENST00000392630.7|ENSG00000180066.11|OTTHUMG00000019289.3|OTTHUMT00000051078.2|LINC02870-201|LINC02870|1846	1.846	1	0	2	2	0	0	5	2.70856	0	0	0	0.0393926	0.398992	0	0.0194334	0.0247982	0	0.0693529	0.0447947	0.0629292	0	0	0.0196555	0	0.0293277	0	0.0435723	0	0.0496244	0
ENST00000413053.2|ENSG00000229719.6|OTTHUMG00000066834.2|OTTHUMT00000143253.2|MIR194-2HG-201|MIR194-2HG|3647	3.647	0	0	0	3	1	1	5	1.37099	0.0540866	0.0185993	0.110314	0	0	0	0.107441	0.176948	0.0291398	0.334101	0	0	0.190419	0	0	0	0	0	0	0	0	0
ENST00000418747.2|ENSG00000234771.3|OTTHUMG00000020737.2|OTTHUMT00000054410.2|SLC25A25-AS1-201|SLC25A25-AS1|6391	6.391	0	1	0	2	1	1	5	0.78235	0.299013	0.40472	1.78085	3.02807	11.0668	10.9047	2.38328	1.3326	1.48108	1.4062	1.38949	1.42033	3.8246	2.23466	0.583963	0.429934	2.73671	4.32247	3.24146	4.16334	3.65963	5.18479
ENST00000435356.2|ENSG00000203392.3|OTTHUMG00000186972.1|OTTHUMT00000474130.1|ENST00000435356|ENSG00000203392|2205	2.205	0	0	2	1	1	1	5	2.26757	0.0183878	0.142214	0.559832	1.15785	2.31782	4.53901	0.240008	0.161441	0.836876	0.266064	0.322778	0.604759	0.247824	0.678129	0.0109354	0	0.1034	0.316079	0.0695164	0.165937	0	0.0285058
ENST00000437621.6|ENSG00000230487.9|OTTHUMG00000151452.4|OTTHUMT00000322709.1|PSMG3-AS1-201|PSMG3-AS1|5701	5.701	1	0	1	3	0	0	5	0.877039	0	0	0	0.0236286	0	0.0274921	0	0	0	0	0	0	0	0.0208421	0	0.15962	0	0	0	0	0.0422935	0
ENST00000441272.2|ENSG00000237588.2|OTTHUMG00000041297.2|OTTHUMT00000098960.2|ENST00000441272|ENSG00000237588|4122	4.122	0	0	1	3	0	1	5	1.213	0	0	0	0	0	0	0	0	0.0254299	0	0.0173712	0	0.0151143	0	0	0	0.0998572	0	0	0	0	0
ENST00000443374.7|ENSG00000226200.7|OTTHUMG00000018230.4|OTTHUMT00000048071.3|SGMS1-AS1-201|SGMS1-AS1|12408	12.408	0	0	0	0	0	5	5	0.402966	0.124547	0.0909926	0	0.0145535	0	0.0547349	0	0.00658478	0.0112471	0	0.0924399	0.330631	0	0.303515	0.029102	0.323433	0.0255256	0.0635129	0.675892	0.487627	0.815373	0.405558
ENST00000443633.1|ENSG00000232903.2|OTTHUMG00000019299.1|OTTHUMT00000051102.1|LINC01166-201|LINC01166|2619	2.619	2	0	2	1	0	0	5	1.90913	0	0	0	0	0	0	0	0	0	0	0	0	0	0	0	0	0	0	0	0	0	0
ENST00000453420.5|ENSG00000236532.6|OTTHUMG00000078706.2|OTTHUMT00000171679.1|LINC01695-203|LINC01695|4486	4.486	0	0	0	0	0	5	5	1.11458	0	0	0	0	0	0	0	0	0	0	0	0	0	0	0.00272436	0	0	0.00437403	0	0	0.079274	0
ENST00000461291.2|ENSG00000240707.3|OTTHUMG00000157745.4|OTTHUMT00000349546.2|LINC01168-201|LINC01168|5254	5.254	1	0	1	1	1	1	5	0.951656	0	0	0	0	0	0	0	0	0	0	0	0	0	0	0	0	0	0	0	0	0	0
ENST00000499624.3|ENSG00000244879.10|OTTHUMG00000172396.6|OTTHUMT00000418307.2|GABPB1-AS1-202|GABPB1-AS1|16182	16.182	0	1	1	0	0	3	5	0.308985	0.0396382	0.0412257	1.38305	3.83369	11.3262	1.47697	0.164014	0.00512877	0.479882	0.932844	0.409985	0.584454	0.0993486	0.609477	0.158468	0.062984	1.65742	0.505684	1.49092	2.83034	1.88177	4.86929
ENST00000501211.2|ENSG00000253284.2|OTTHUMG00000168904.1|OTTHUMT00000401571.1|ENST00000501211|ENSG00000253284|5391	5.391	0	0	0	0	0	5	5	0.927472	0.154378	0.058679	1.6e-10	0	0	0	0.00152713	0	2.24505	2.50731	3.16242	2.99153	1.55933	4.12236	0	0.0337207	3.60827	4.8074	1.90584	1.36262	0.746596	1.03962
ENST00000505448.3|ENSG00000251615.3|OTTHUMG00000160053.5|OTTHUMT00000359029.5|ENST00000505448|ENSG00000251615|3249	3.249	0	1	0	0	0	4	5	1.53894	0.0122007	0.0209777	0.00768007	0.0558599	0.0872567	0.0416966	0.0338425	0	0	0	0.0227022	0	0.0197111	0.101028	0.166337	0.141759	0.522328	0.279532	0.700301	1.07118	0.754832	1.30116
ENST00000520314.2|ENSG00000290469.1|-|OTTHUMT00000381543.3|ENST00000520314|ENSG00000290469|7870	7.87	0	0	0	2	0	3	5	0.635324	0	0	0	0	0.113428	0.0274631	0	0	0	0	0	0	0	0	0.132588	0.0508557	0.191683	0.207844	0.531533	0.43927	0.3403	0.216025
ENST00000526269.2|ENSG00000254703.4|OTTHUMG00000165793.2|OTTHUMT00000386230.2|SENCR-201|SENCR|1298	1.298	0	0	3	2	0	0	5	3.85208	0	0	0	0	0	0	0	0	0	0	0	0	0	0.0803154	0	0	0	0	0	0	0	0
ENST00000535913.2|ENSG00000204044.6|OTTHUMG00000032629.3|OTTHUMT00000471537.2|SLC12A5-AS1-202|SLC12A5-AS1|1957	1.957	1	0	2	2	0	0	5	2.55493	0.123602	0	0	0	0	0	0.0921314	0.376236	0	0	0	0	0	0	0.216025	0.355057	0.157294	0	0	0	0.0155006	0
ENST00000556430.1|ENSG00000258811.1|OTTHUMG00000170761.1|OTTHUMT00000410286.1|ENST00000556430|ENSG00000258811|3254	3.254	0	0	1	3	0	1	5	1.53657	0.0121811	0.010472	0.0306701	0.0557687	0.348457	0.270583	0.00675713	0	0.0331399	0.126616	0	0	0	0	0.00722032	0	0.391057	0.119589	0.109228	0.0209667	0.0221617	0.03608
ENST00000562242.1|ENSG00000261451.1|OTTHUMG00000163781.2|OTTHUMT00000375444.2|ENST00000562242|ENSG00000261451|4641	4.641	0	1	0	0	0	4	5	1.07735	0.00842348	0.0144845	0.110912	0.207291	0.98956	0.314675	0	0	0.156271	0.199183	0.060973	0.128598	0.13274	0.0508834	0.119575	0.036619	1.22644	1.07146	1.18663	2.24335	1.0406	1.1419
ENST00000562691.2|ENSG00000261324.2|OTTHUMG00000172902.2|OTTHUMT00000421264.2|ENST00000562691|ENSG00000261324|5428	5.428	1	0	0	0	0	4	5	0.92115	0	0	0	0	0.0256624	0.0242948	0	0	0.0376726	0.0240166	0.0385659	0.090383	0.0672306	0.143058	1.3893	0.460073	24.5972	16.147	2.07376	2.46342	0.739025	1.24008
ENST00000562866.1|ENSG00000261373.1|OTTHUMG00000173220.1|OTTHUMT00000422513.1|VPS9D1-AS1-202|VPS9D1-AS1|1753	1.753	0	0	2	3	0	0	5	2.85225	1.04213	0.940671	1.7238	1.96382	7.32316	14.4744	0.626259	2.23513	3.92505	3.07592	2.56022	2.35577	3.04314	1.94842	0.0140504	0	0.276225	0.0845069	0.0330993	0.017973	0.0335225	0
ENST00000563495.1|ENSG00000259921.1|OTTHUMG00000177239.1|OTTHUMT00000435964.1|ENST00000563495|ENSG00000259921|3910	3.91	0	0	0	1	0	4	5	1.27877	0	0	0.0102051	0	0	0	0.00952961	0.0101633	0	0	0.0382401	0	0.011661	0.0753495	0	0	0	0	0	0	0	0
ENST00000563592.5|ENSG00000260898.6|OTTHUMG00000173100.2|OTTHUMT00000422136.1|ADPGK-AS1-201|ADPGK-AS1|2730	2.73	0	1	2	2	0	0	5	1.8315	0.0263025	0.108187	0.122004	0.0698525	0.409176	0.509488	0.0674405	0.0414156	0.449227	0.778171	0.00663544	0.130437	0.0425106	0.0463592	0.0555785	0.0426172	0.355554	0.315247	0.0292359	0.0324235	0.0766617	0.0270968
ENST00000565862.1|ENSG00000260398.1|OTTHUMG00000173418.1|OTTHUMT00000423041.1|ENST00000565862|ENSG00000260398|3754	3.754	2	0	0	0	0	3	5	1.33191	0	0	0	0	0	0	0.00289261	0	0	0	0	0	0	0	0	0	0	0	0	0	0	0
ENST00000567769.1|ENSG00000261501.1|OTTHUMG00000176031.1|OTTHUMT00000431404.1|BBS7-DT-201|BBS7-DT|2266	2.266	1	0	0	0	0	4	5	2.20653	0	0	0.0113165	0.0329558	0.132207	0.0308016	0	0	0.050603	0.0643603	0	0	0	0.0771676	0	0	0.0999029	0	0.0336032	0	0	0
ENST00000567913.2|ENSG00000291201.1|-|OTTHUMT00000364170.2|ENST00000567913|ENSG00000291201|4395	4.395	0	0	0	5	0	0	5	1.13766	0.150768	0.161097	2.77395	2.03628	17.0169	24.0006	2.84878	2.89055	1.89583	1.99145	3.04172	3.73884	4.10936	3.85353	0.199751	0.103517	1.15028	1.9088	4.38399	4.07241	2.41974	2.94017
ENST00000567967.1|ENSG00000260385.1|OTTHUMG00000176075.1|OTTHUMT00000431476.1|ENST00000567967|ENSG00000260385|1923	1.923	1	0	0	0	0	4	5	2.6001	0	0	0	0	0	0	0	0	0	0	0	0	0	0	0	0	0	0	0	0	0	0
ENST00000568279.2|ENSG00000261807.2|OTTHUMG00000173092.3|OTTHUMT00000422126.2|LINC02141-201|LINC02141|6586	6.586	0	0	0	0	0	5	5	0.759186	0	0	0	0	0	0.00496679	0	0	0.00789006	0	0	0.00427459	0	0.000766382	0	0	0	0	0	0	0	0
ENST00000569852.1|ENSG00000269937.1|OTTHUMG00000177162.3|OTTHUMT00000475370.1|ENST00000569852|ENSG00000269937|3626	3.626	0	0	3	2	0	0	5	1.37893	0.0326384	0.0467663	0.123074	0.0994585	0.660324	0.667783	0.0540574	0.116125	0.557251	0.26154	0.32073	0.366358	0.418147	0.289934	0.0193319	0.0157884	0.230532	0.17624	0.231632	0.29678	0.0979189	0.462938
ENST00000569969.5|ENSG00000261067.7|OTTHUMG00000176707.1|OTTHUMT00000433224.1|ENST00000569969|ENSG00000261067|5296	5.296	2	0	1	2	0	0	5	0.944109	0.00886026	0.0262821	0.462135	0.229421	1.12189	7.31954	0.162615	0.0830634	0.0884587	0.17709	0.0430926	0	0.22373	0.0376114	0.130567	0.0784942	0	0	0.416509	0.291647	0.306384	0.387545
ENST00000572811.1|ENSG00000262420.3|OTTHUMG00000177468.1|OTTHUMT00000437065.1|ENST00000572811|ENSG00000262420|2597	2.597	0	0	2	2	0	1	5	1.9253	0.308893	0.199148	0.195207	0.511177	0.554421	0.903913	0.567973	0.190016	4.21498	4.10509	0.147263	0.662318	0.433571	0.360391	0.752094	0.337126	8.56187	5.34088	1.05338	0.789891	1.64584	1.07737
ENST00000577346.1|ENSG00000264727.1|OTTHUMG00000178265.1|OTTHUMT00000441216.1|ENST00000577346|ENSG00000264727|2607	2.607	0	0	0	0	0	5	5	1.91791	0	0	0	0	0	0	0	0	0	0	0	0	0	0	0	0	0	0	0	0	0	0
ENST00000578539.1|ENSG00000264853.1|OTTHUMG00000179609.1|OTTHUMT00000447300.1|ENST00000578539|ENSG00000264853|2790	2.79	0	0	0	0	0	5	5	1.79211	0.087738	0	2.84779	3.54724	39.5355	10.7013	0	0	3.32981	4.81421	2.0152	2.46599	0.0390641	1.69679	0.211684	0.133477	5.51541	6.66304	1.0429	1.62912	0.884128	1.58114
ENST00000579352.1|ENSG00000264177.1|OTTHUMG00000179473.1|OTTHUMT00000446568.1|ENST00000579352|ENSG00000264177|4955	4.955	0	0	1	4	0	0	5	1.00908	0	0	0	0	0	0	0	0	0	0	0	0	0	0	0	0	0	0	0	0	0	0
ENST00000592718.1|ENSG00000267719.1|OTTHUMG00000177461.2|OTTHUMT00000437037.2|LINC02078-201|LINC02078|4237	4.237	0	0	2	3	0	0	5	1.18008	0	0	0	0	0	0	0	0	0	0	0	0	0	0	0	0	0	0	0	0	0	0
ENST00000594169.3|ENSG00000268531.3|OTTHUMG00000187342.2|OTTHUMT00000474787.2|ENST00000594169|ENSG00000268531|2163	2.163	0	0	3	2	0	0	5	2.3116	0	0	0	0	0	0	0	0	0	0	0	0	0	0	0	0	0	0	0	0	0	0
ENST00000598970.2|ENSG00000268635.2|OTTHUMG00000165139.1|OTTHUMT00000382087.1|ENST00000598970|ENSG00000268635|3660	3.66	0	0	2	2	0	1	5	1.36612	0	0	0.00677042	0.0197032	0	0	0	0	0.406335	0.554626	0	0.111549	0.0689691	0	0.00638245	0	0	0.139515	0	0.0183553	0	0
ENST00000600671.1|ENSG00000267934.1|OTTHUMG00000183269.1|OTTHUMT00000465894.1|ENST00000600671|ENSG00000267934|5134	5.134	0	0	0	0	1	4	5	0.973899	0	0	0	0	0	0	0	0	0	0	0	0	0	0	0	0	0	0	0.0131143	0	0	0
ENST00000600936.1|ENSG00000269883.1|OTTHUMG00000187021.1|OTTHUMT00000474261.1|ENST00000600936|ENSG00000269883|2314	2.314	1	0	1	3	0	0	5	2.16076	0	0	0	0	0	0	0	0	0	0	0	0	0	0.0227125	0	0	0	0	0	0	0.0255335	0.0147287
ENST00000602455.1|ENSG00000270012.1|OTTHUMG00000184084.1|OTTHUMT00000468002.1|ENST00000602455|ENSG00000270012|2715	2.715	1	0	0	1	0	3	5	1.84162	1.17643	0.880285	2.87834	3.64312	8.58715	9.12717	6.01599	2.29588	3.74983	3.2051	1.49876	2.71138	0.449738	1.24167	0.976864	0.554593	9.22229	7.68977	0.68145	0.897669	0.65655	0.231093
ENST00000607453.1|ENSG00000272195.1|OTTHUMG00000185820.1|OTTHUMT00000471377.1|ENST00000607453|ENSG00000272195|1739	1.739	1	0	2	2	0	0	5	2.87522	0.380109	0.530859	0.621827	0.728282	3.61767	2.27676	0.185802	0.27502	3.94168	3.57556	0.193543	0.611702	0.291124	0.914665	0.297685	0.0694888	6.14104	3.50136	0.565617	0.223475	0.52548	0.537125
ENST00000608229.1|ENSG00000273372.1|OTTHUMG00000186448.1|OTTHUMT00000473167.1|SFTPD-AS1-201|SFTPD-AS1|5001	5.001	0	0	0	0	0	5	5	0.9998	0	0	0.00488328	0	0	0.0132635	0	0	0	0	0	0	0	0	0.00299001	0	0	0	0	0	0	0
ENST00000608517.1|ENSG00000273062.1|OTTHUMG00000186473.1|OTTHUMT00000473212.1|RALGPS2-AS1-201|RALGPS2-AS1|1980	1.98	2	1	1	1	0	0	5	2.52525	0	0	0.0131246	0	0.149087	0.0715383	0.0118145	0.0228454	0.179134	0.0758924	0	0	0	0	0.295007	0.331376	3.77989	1.87894	0.636875	0.454515	0.121059	0.357882
ENST00000608826.1|ENSG00000272631.1|OTTHUMG00000186453.1|OTTHUMT00000473174.1|ENST00000608826|ENSG00000272631|6545	6.545	1	0	0	0	1	3	5	0.763942	0.33742	0.254879	1.2902	1.38186	3.86467	2.58171	1.09422	0.634813	6.73738	7.84485	0.452227	1.00568	0.256911	0.456426	0.822724	0.685086	10.5714	5.94722	1.51322	1.43137	0.757655	1.17423
ENST00000610145.2|ENSG00000273175.2|OTTHUMG00000185822.1|OTTHUMT00000471386.1|ENST00000610145|ENSG00000273175|1514	1.514	2	0	0	1	0	2	5	3.30251	1.32771	1.25984	1.54371	2.58222	2.61985	2.66866	0.170815	0.0734095	17.4051	17.2568	0.232785	0.490343	0.398644	0.258801	0.942895	0.932637	21.3433	8.742	0.341525	0.376075	0.288339	0.230381
ENST00000614819.1|ENSG00000275807.1|OTTHUMG00000188139.1|OTTHUMT00000476276.1|ENST00000614819|ENSG00000275807|1539	1.539	1	2	1	1	0	0	5	3.24886	1.60271	1.23726	1.48027	1.64732	6.9228	5.33238	0.542152	0.729816	10.6619	9.7525	1.70742	2.79742	1.41395	1.13898	0.893242	0.159241	9.53118	3.41918	1.05711	0.735636	0.507332	0.405629
ENST00000621919.1|ENSG00000277287.1|OTTHUMG00000186579.1|OTTHUMT00000473410.1|ENST00000621919|ENSG00000277287|5678	5.678	2	0	1	2	0	0	5	0.880592	0	0.0117708	0.0214049	0.0186793	0.0243214	0.034777	0.00558606	0	0.0179456	0	0.0122459	0.01722	0.0106765	0	0.00809139	0	0.10553	0.21511	0	0.0226737	0	0.087873
ENST00000623128.1|ENSG00000279108.1|OTTHUMG00000182783.1|OTTHUMT00000463644.1|ENST00000623128|ENSG00000279108|1881	1.881	1	0	0	0	0	4	5	2.65816	0	0.0291611	0	0	1.20263	0	0.110166	0.00493515	0.587991	0.0259082	0	0.444874	0.535869	1.21914	0	0	0.840852	0.118076	0.270235	0.475862	0	0.239638
ENST00000623196.1|ENSG00000180539.8|OTTHUMG00000020959.4|OTTHUMT00000055213.3|LINC02908-202|LINC02908|4990	4.99	0	0	2	3	0	0	5	1.002	0	0	0	0	0	0	0	0	0	0	0	0.0198024	0	0	0	0	0	0	0	0	0	0
ENST00000623210.1|ENSG00000280138.1|OTTHUMG00000168768.1|OTTHUMT00000400950.1|ENST00000623210|ENSG00000280138|18662	18.662	0	1	0	0	0	4	5	0.267924	0.0502252	0.0122879	0.174473	0.25643	1.61548	0.172312	0	0	0	0	1.45389	2.67279	0.394067	1.19869	0	0.0336466	0	0.0909765	0.235708	0.378444	0.802349	0.238609
ENST00000623254.1|ENSG00000197322.4|OTTHUMG00000156883.2|OTTHUMT00000346435.1|TMEM132E-DT-201|TMEM132E-DT|3997	3.997	2	0	1	1	0	1	5	1.25094	0	0	0	0	0	0	0	0	0	0	0	0	0	0	0	0	0	0	0	0	0	0
ENST00000623391.1|ENSG00000280341.1|OTTHUMG00000189266.1|OTTHUMT00000479247.1|ENST00000623391|ENSG00000280341|6114	6.114	0	0	0	0	1	4	5	0.817795	0	0	0	0	0.0684589	0	0	0	0	0	0	0	0	0	0	0	0	0	0	0	0	0
ENST00000623453.1|ENSG00000279689.1|OTTHUMG00000187421.1|OTTHUMT00000474933.1|ENST00000623453|ENSG00000279689|3599	3.599	0	0	3	2	0	0	5	1.38927	0.21929	0.216806	0.737398	0.661627	2.38816	3.42158	0.342119	0.511202	2.98716	3.61695	0.0808602	0.142097	0.0527066	0.337366	0.0714413	0.0318253	1.33679	1.63514	0.155737	0.112232	0	0.0804894
ENST00000623543.1|ENSG00000280007.1|OTTHUMG00000189278.1|OTTHUMT00000479267.1|ENST00000623543|ENSG00000280007|20396	20.396	0	0	2	3	0	0	5	0.245146	0.00203365	0.00643775	0.00232598	0	0.0598385	0.00314212	0	0	0	0	0	0.00454376	0	0.00359531	0.113592	0.0216043	1.06856	1.1959	0.367662	0.481754	0.0501841	0.0662114
ENST00000623569.1|ENSG00000280213.1|OTTHUMG00000187354.1|OTTHUMT00000474801.1|UCKL1-AS1-201|UCKL1-AS1|3602	3.602	1	0	3	1	0	0	5	1.38812	0.0657926	0.0376779	0.0481986	0.0701133	1.13437	1.15826	0.0182725	0.0779756	0.177289	0.150566	0.0605883	0.141964	0.0702101	0.0449399	0.285715	0.111291	1.45167	0.67475	0.233385	0.224253	0.453833	0.337739
ENST00000623602.1|ENSG00000280106.1|OTTHUMG00000175770.1|OTTHUMT00000431049.1|ENST00000623602|ENSG00000280106|2168	2.168	1	0	0	0	0	4	5	2.30627	0.580304	0.595343	1.68656	2.35014	17.8098	3.36338	1.42568	0.288015	5.76653	9.77695	8.97107	12.2457	10.3709	13.3989	0.623701	0.928006	8.01629	8.84015	6.2832	7.37885	3.41936	4.33383
ENST00000623686.1|ENSG00000221953.5|OTTHUMG00000165196.2|OTTHUMT00000382614.2|LINC02897-201|LINC02897|2258	2.258	0	0	2	3	0	0	5	2.21435	0.179295	0.138759	0.40899	0.347095	0.645283	1.11316	0.106644	0.118026	3.10001	4.33055	0.0696777	0.195829	0.0602089	0.116251	0.181297	0.1829	3.81276	2.57794	0.270002	0.450913	0.581793	0.608992
ENST00000623740.1|ENSG00000280395.1|OTTHUMG00000189186.1|OTTHUMT00000479008.1|ENST00000623740|ENSG00000280395|3693	3.693	1	0	0	0	0	4	5	1.35391	0	0	0	0	0	0	0	0	0	0	0	0	0	0	0	0	0	0	0	0	0	0
ENST00000623789.1|ENSG00000278920.1|OTTHUMG00000189271.1|OTTHUMT00000479253.1|ENST00000623789|ENSG00000278920|16698	16.698	0	0	1	0	0	4	5	0.299437	0.00579445	0.00533315	0.00223962	0	0	0.005382	0.00141597	0	0.0118603	0.0621152	0	0	0	0	0.00937676	0.0041731	0.019671	0.011141	0	0	0	0
ENST00000624293.1|ENSG00000279694.1|OTTHUMG00000177202.1|OTTHUMT00000435830.1|ENST00000624293|ENSG00000279694|2550	2.55	1	0	2	1	0	1	5	1.96078	0	0	0	0	0	0	0	0	0	0	0	0	0	0	0	0	0	0	0	0	0	0
ENST00000625022.1|ENSG00000280053.1|OTTHUMG00000175765.1|OTTHUMT00000431044.1|ENST00000625022|ENSG00000280053|3362	3.362	1	0	0	0	1	3	5	1.48721	0.0117722	0.0101205	0.0666583	0.086191	0.252447	0.281423	0.00326026	0.0126067	0.383222	0.0813498	0.698716	0.521818	0.303432	0.437265	0.00697631	0	0	0.192016	0.105205	0.262628	0.0426918	0.104301
ENST00000625110.1|ENSG00000280351.2|OTTHUMG00000177659.1|OTTHUMT00000438276.1|ENST00000625110|ENSG00000280351|1798	1.798	1	0	3	1	0	0	5	2.78087	0.194848	0.248692	0	0	0	0	0.126227	0.27772	0	0	0	0.14209	0	0	0	0	0	0	0	0.0297039	0	0
ENST00000629393.1|ENSG00000281026.1|OTTHUMG00000189577.1|OTTHUMT00000479998.1|N4BP2L2-IT2-201|N4BP2L2-IT2|4890	4.89	0	0	0	0	0	5	5	1.02249	1.00227	0.597523	1.8555	2.38883	21.0882	2.75664	0.182209	0.0148543	9.06438	13.7011	6.80252	8.16686	2.93549	5.70544	1.54936	0.258307	20.495	21.7785	6.06819	10.1557	1.49089	0.677299
ENST00000632346.1|ENSG00000282024.1|OTTHUMG00000191399.1|OTTHUMT00000487787.1|ENST00000632346|ENSG00000282024|1026	1.026	1	0	2	2	0	0	5	4.87329	0.237317	0.295494	0.569533	0.654524	9.11134	7.13374	0.796281	1.30624	7.11192	12.6452	5.22577	10.4301	13.7729	24.3231	0.0259313	0	0	0	0	0	0	0.245028
ENST00000634317.1|ENSG00000291202.1|-|OTTHUMT00000488433.2|ENST00000634317|ENSG00000291202|5052	5.052	0	0	1	4	0	0	5	0.989707	0.0640966	0.0341773	0.535178	0.500757	4.99387	4.2844	0.77356	0.630977	0.724473	0.813906	0.316548	0.406632	0.555157	0.58076	0.154856	0.259307	1.049	0.316155	0.589381	0.859807	0.677152	0.589239
ENST00000636308.1|ENSG00000265479.7|OTTHUMG00000179528.3|OTTHUMT00000489280.1|DTX2P1-UPK3BP1-PMS2P11-203|DTX2P1-UPK3BP1-PMS2P11|4646	4.646	0	0	4	1	0	0	5	1.07619	0.0308582	0	0.0726093	0.0275097	0.652947	0.628083	0.0524538	0.102658	0.0381219	0.108012	0.0549981	0.0910903	0.0886735	0.210754	0	0.025372	0.372422	0.191607	0.226216	0.322949	0.165254	0.302244
ENST00000637205.2|ENSG00000283415.2|OTTHUMG00000191628.2|OTTHUMT00000488916.2|ENST00000637205|ENSG00000283415|4823	4.823	0	0	0	0	0	5	5	1.0367	0.164852	0.204868	0.235188	0.895961	0.349799	0.739307	0.0874244	0.201126	0	0.218585	0.310962	0.0945984	0.241372	0	0	0	0	0	0	0	0	0
ENST00000641216.1|ENSG00000284664.1|OTTHUMG00000192273.1|OTTHUMT00000493250.1|ENST00000641216|ENSG00000284664|2071	2.071	1	0	0	0	0	4	5	2.41429	0	0	0	0	0	0	0	0	0	0	0	0	0.0669777	0	0	0	0	0	0.000682046	0	0	0.0315051
ENST00000648391.1|ENSG00000285628.1|OTTHUMG00000166285.4|OTTHUMT00000499493.2|ENST00000648391|ENSG00000285628|4082	4.082	1	0	3	1	0	0	5	1.22489	0.122155	0.161285	0.226564	0.442971	3.9118	4.06319	0.0710256	0.0502273	0	0.0540617	0.066347	0	0.119365	0.0903741	0.27052	0.264623	0	0.1626	0.4997	0.350281	1.24089	1.67901
ENST00000652952.1|ENSG00000287536.1|OTTHUMG00000195652.1|OTTHUMT00000528056.1|ENST00000652952|ENSG00000287536|3327	3.327	0	0	0	0	1	4	5	1.50286	0	0	0	0	0	0	0	0	0	0	0	0	0	0	0	0	0	0	0	0	0	0
ENST00000653672.1|ENSG00000286520.1|OTTHUMG00000195438.1|OTTHUMT00000526891.1|ENST00000653672|ENSG00000286520|4270	4.27	0	0	0	0	0	5	5	1.17096	0	0	0.00575819	0	0	0	0	0	0	0	0	0	0	0	0	0	0	0	0	0	0	0
ENST00000654141.1|ENSG00000224687.2|OTTHUMG00000040865.2|OTTHUMT00000527912.1|RASAL2-AS1-204|RASAL2-AS1|2831	2.831	1	0	0	0	0	4	5	1.76616	0.0150519	0.048625	0.0794057	0.148399	0.758939	0	0.0196915	0.0253819	0	0	0.0532253	0.0374064	0.0463477	0.0888157	0.215618	0.0179457	0	0.316074	0.0231553	0.244683	0	0.0520618
ENST00000655519.1|ENSG00000287318.1|OTTHUMG00000195030.1|OTTHUMT00000523838.1|ENST00000655519|ENSG00000287318|3766	3.766	1	0	0	0	0	4	5	1.32767	0	0	0	0	0	0	0	0	0	0	0	0	0	0	0	0	0	0	0	0	0	0
ENST00000655749.1|ENSG00000291194.1|-|OTTHUMT00000467714.2|ENST00000655749|ENSG00000291194|6715	6.715	0	1	0	0	0	4	5	0.744602	0.527641	0.352342	0.068349	0.0157474	1.83475	0.120802	0	0.02425	0.155857	0.150953	0.281766	1.05544	0.592028	1.08321	0.0196539	0	0.00676468	0	0.114603	0.0796065	0.0925477	0.255575
ENST00000656997.1|ENSG00000224944.2|OTTHUMG00000015221.3|OTTHUMT00000526274.1|CASC6-203|CASC6|2577	2.577	2	0	0	0	0	3	5	1.94024	0	0	0	0	0	0	0	0	0	0	0	0	0	0	0	0	0	0	0	0	0	0
ENST00000657314.1|ENSG00000287400.1|OTTHUMG00000195668.1|OTTHUMT00000528148.1|ENST00000657314|ENSG00000287400|4437	4.437	1	0	0	0	0	4	5	1.12689	0	0	0	0	0	0	0	0	0.0382949	0	0.000606522	0	0	0	0.0093086	0	0.118013	0.138179	0	0.114067	0	0
ENST00000657329.1|ENSG00000227885.4|OTTHUMG00000014883.5|OTTHUMT00000527399.1|ENST00000657329|ENSG00000227885|3695	3.695	2	0	0	1	0	2	5	1.35318	0	0	0	0	0	0	0	0	0	0	0	0	0	0	0.00877363	0.142927	0.518172	0	0.201282	0.552166	0.0890362	0.105205
ENST00000658292.1|ENSG00000259807.2|OTTHUMG00000176712.4|OTTHUMT00000524556.1|ENST00000658292|ENSG00000259807|3168	3.168	0	1	0	0	0	4	5	1.57828	0	0	0	0	0	0	0	0	0	0	0	0	0	0	0	0	0	0	0	0.0216182	0	0
ENST00000660308.1|ENSG00000248801.7|OTTHUMG00000164449.3|OTTHUMT00000378853.3|C8orf34-AS1-209|C8orf34-AS1|2842	2.842	0	0	0	0	0	5	5	1.75932	NA	NA	NA	NA	NA	NA	NA	NA	NA	NA	NA	NA	NA	NA	NA	NA	NA	NA	NA	NA	NA	NA
ENST00000660360.2|ENSG00000257303.4|OTTHUMG00000170366.3|OTTHUMT00000524524.1|CNPY2-AS1-203|CNPY2-AS1|3558	3.558	1	0	2	2	0	0	5	1.40528	0.111053	0.18736	0	0	0	0.730155	0.256116	0.273592	0.332299	0	0.141727	0	0.188935	0.143738	0.193839	0.18167	0.0320809	0.404395	0.367979	0.424552	0	0.204549
ENST00000660627.1|ENSG00000287177.1|OTTHUMG00000195841.1|OTTHUMT00000529004.1|ENST00000660627|ENSG00000287177|4401	4.401	2	0	0	0	0	3	5	1.13611	0	0	0	0	0	0	0	0	0	0	0	0	0	0	0	0	0	0	0	0	0	0
ENST00000660707.1|ENSG00000286529.1|OTTHUMG00000194893.1|OTTHUMT00000522959.1|ENST00000660707|ENSG00000286529|1467	1.467	0	0	2	1	1	1	5	3.40832	0	0	0	0.0267733	0	0	0.0338221	0	0	0	0	0	0.0519822	0	0	0	0	0	0	0	0.0445362	0.118356
ENST00000661640.1|ENSG00000286364.1|OTTHUMG00000195456.1|OTTHUMT00000526965.1|ENST00000661640|ENSG00000286364|2957	2.957	1	0	0	0	0	4	5	1.6909	0	0	0	0	0.0422965	0	0	0	0	0	0	0.0017299	0	0	0.000733312	0	0	0	0	0	0	0
ENST00000663663.1|ENSG00000272274.4|OTTHUMG00000185758.6|OTTHUMT00000523104.1|LINC00551-204|LINC00551|2666	2.666	1	0	0	0	0	4	5	1.87547	0	0	0	0	0	0	0	0	0	0	0	0	0	0	0	0	0	0	0	0	0	0
ENST00000664457.1|ENSG00000287562.1|OTTHUMG00000193845.2|OTTHUMT00000505315.2|ENST00000664457|ENSG00000287562|4799	4.799	1	0	0	1	0	3	5	1.04188	0.862578	0.755615	5.39804	7.29713	30.0014	22.9129	1.43895	0.814088	4.99362	5.76165	3.24855	3.84326	3.48147	4.67771	0.534655	0.306735	2.40678	2.40142	1.55319	2.9109	0.845372	1.19464
ENST00000664772.1|ENSG00000287650.1|OTTHUMG00000194808.1|OTTHUMT00000522248.1|ENST00000664772|ENSG00000287650|2345	2.345	1	0	0	0	0	4	5	2.1322	0	0	0.0109017	0	0	0	0	0	0	0	0	0	0	0	0	0	0	0	0	0	0	0
ENST00000665595.1|ENSG00000286274.1|OTTHUMG00000195576.1|OTTHUMT00000527583.1|ENST00000665595|ENSG00000286274|3895	3.895	1	0	0	0	0	4	5	1.2837	0	0.00864893	0	0.00387417	0	0.0410837	0	0	0.035535	0.058122	0	0	0.0687521	0	0.0331515	0.0146882	0	0.26414	0	0.0677624	0	0
ENST00000666016.1|ENSG00000287307.1|OTTHUMG00000195049.1|OTTHUMT00000524035.1|ENST00000666016|ENSG00000287307|4429	4.429	0	0	0	0	0	5	5	1.12892	0	0	0	0	0	0	0	0	0	0	0	0	0	0.0159628	0	0	0	0	0	0	0	0
ENST00000668456.1|ENSG00000287578.1|OTTHUMG00000195375.1|OTTHUMT00000526678.1|ENST00000668456|ENSG00000287578|5936	5.936	0	0	0	0	0	5	5	0.842318	0	0	0	0	0	0	0	0	0	0	0	0	0	0	0	0	0	0	0	0	0	0
ENST00000669760.1|ENSG00000287215.1|OTTHUMG00000194747.1|OTTHUMT00000521488.1|ENST00000669760|ENSG00000287215|3627	3.627	0	0	0	0	0	5	5	1.37855	NA	NA	NA	NA	NA	NA	NA	NA	NA	NA	NA	NA	NA	NA	NA	NA	NA	NA	NA	NA	NA	NA
ENST00000670781.1|ENSG00000288076.1|OTTHUMG00000195518.1|OTTHUMT00000527324.1|ENST00000670781|ENSG00000288076|3275	3.275	0	0	0	1	1	3	5	1.52672	0	0	0	0	0.0432607	0	0.0369038	0	0	0.0418989	0	0	0	0	0	0	0	0	0	0	0	0
ENST00000673624.1|ENSG00000288586.1|OTTHUMG00000195966.1|OTTHUMT00000530293.1|ENST00000673624|ENSG00000288586|1703	1.703	1	0	2	2	0	0	5	2.936	0.218751	0.0626672	0.372657	0.406703	0.970016	1.0174	0.0846644	0.191011	3.32666	3.67314	0.49727	0.908025	0.598074	0.774113	0.449735	0.497825	11.0464	5.17912	1.55098	1.5157	1.22799	0.709588
ENST00000674627.1|ENSG00000204055.5|OTTHUMG00000020777.2|-|IER5L-AS1-206|IER5L-AS1|3339	3.339	0	0	1	3	1	0	5	1.49745	0	0.022254	0	0	0	0	0.00365765	0	0	0	0	0	0	0	0	0	0	0	0	0	0	0
ENST00000686267.2|ENSG00000289412.2|-|-|ENST00000686267|ENSG00000289412|1085	1.085	1	0	2	2	0	0	5	4.60829	0	0	0.0262485	0.0382123	0	0.0722258	0	0	0.136724	0.172766	0	0.133084	0	0.1054	0.0242661	0	2.2011	0.842398	0.094218	0.524326	0.285961	0.149397
ENST00000688847.1|ENSG00000289479.1|-|-|ENST00000688847|ENSG00000289479|1764	1.764	0	0	2	2	0	1	5	2.83447	0	0	0	0	0	0	0.00676579	0.0290614	0	0	0	0	0	0	0	0	0	0	0	0	0	0
ENST00000690278.2|ENSG00000289183.2|-|-|ENST00000690278|ENSG00000289183|1790	1.79	1	0	1	1	0	2	5	2.7933	0.207183	0.237421	1.58578	1.68786	3.83598	2.72422	2.37386	1.03725	6.1039	5.6857	1.77099	1.96406	3.32717	1.55476	1.62017	1.51436	57.794	45.5591	18.3736	16.3178	5.9317	10.9414
ENST00000692381.2|ENSG00000289453.2|-|-|ENST00000692381|ENSG00000289453|1527	1.527	1	0	0	1	1	2	5	3.27439	0	0.0941883	0.0351426	0.0767128	0.0997841	0.240217	0.00804941	0.134912	1.58695	0.635798	0.230089	0.161558	0.0492664	0.127904	0.114688	0	0.498296	0.609883	0.0562461	0	0.0569857	0
ENST00000692840.1|ENSG00000288751.1|-|-|ENST00000692840|ENSG00000288751|1393	1.393	1	0	2	2	0	0	5	3.58938	0.667523	0.912555	0.937365	1.30739	1.77426	2.35272	0.225415	0.546399	5.20818	3.96122	0.522546	0.641941	0.836613	0.943907	0.345299	0.133657	4.53072	2.42639	0.12815	0.180821	0.129797	0.361615
ENST00000698129.1|ENSG00000289740.1|-|-|TALAM1-201|TALAM1|8121	8.121	1	0	2	0	0	2	5	0.615688	0.555557	0.408285	3.34437	6.36329	36.3873	9.80904	0.0128204	0.00826132	0.196384	0.140908	0.309654	0.0941579	0.482309	0.204896	0.311097	0.0892535	0.120147	0.073467	0.0721875	0.0542472	0.0488466	0.0867957
ENST00000313737.5|ENSG00000177340.5|OTTHUMG00000187470.1|OTTHUMT00000475045.1|FLJ13224-201|FLJ13224|1514	1.514	0	0	2	2	0	0	4	2.64201	0.193624	0.213934	0.0354876	0.0258222	0.201527	0.291127	0	0.0314612	0.253472	0.643112	0	0.0817238	0.099661	0	0.281214	0.202747	3.1931	0.925624	0.113842	0.10745	0.115336	0.0460762
ENST00000315293.6|ENSG00000290573.1|-|OTTHUMT00000143966.2|ENST00000315293|ENSG00000290573|3739	3.739	0	0	0	1	1	2	4	1.0698	0	0	0	0.00968406	0	0	0	0	0	0	0	0	0.0168369	0	0	0	0	0	0	0.0207613	0	0
ENST00000336600.6|ENSG00000181577.16|OTTHUMG00000014753.5|OTTHUMT00000040702.4|LINC03040-201|LINC03040|5250	5.25	0	0	1	2	0	1	4	0.761905	0.102381	0.114813	0	0	0	0.192045	0.0608021	0.158991	0.0107338	0	0.026655	0	0	0	0.0181942	0.0322313	0.0109668	0	0.0127987	0	0	0
ENST00000339021.4|ENSG00000274751.1|OTTHUMG00000047845.7|OTTHUMT00000431991.2|ENST00000339021|ENSG00000274751|3867	3.867	0	0	1	2	0	1	4	1.03439	0	0	0.236403	0.418222	0.907433	0.831751	0.210115	0.0938828	0.245659	0.0695554	0.149204	0.0262211	0.0324383	0.041502	0.00602434	0.01476	0.64336	0.393464	0.0897455	0.155333	0.0182114	0.029711
ENST00000342892.4|ENSG00000204380.4|OTTHUMG00000153965.2|OTTHUMT00000333244.1|PKP4-AS1-201|PKP4-AS1|4067	4.067	0	0	0	0	1	3	4	0.983526	0	0	0	0.00363553	0.0692827	0	0	0	0	0	0	0	0	0	0	0	0	0	0	0	0	0
ENST00000371390.1|ENSG00000203987.3|OTTHUMG00000180102.2|OTTHUMT00000449768.1|ENST00000371390|ENSG00000203987|3222	3.222	0	0	1	3	0	0	4	1.24146	0	0	0	0	0	0	0	0	0	0	0	0	0	0	0	0	0	0	0	0	0	0
ENST00000375644.3|ENSG00000182776.4|OTTHUMG00000021545.1|OTTHUMT00000056604.1|ENST00000375644|ENSG00000182776|2369	2.369	0	0	1	2	1	0	4	1.68848	0	0	0	0	0	0	0	0	0	0	0	0	0	0	0	0	0	0	0	0	0	0
ENST00000377300.3|ENSG00000204754.3|OTTHUMG00000163125.1|OTTHUMT00000371773.1|LINC01951-201|LINC01951|1925	1.925	0	0	1	0	1	2	4	2.07792	0	0	0	0	0.0695838	0	0	0	0	0	0	0	0	0.0461605	0.0110652	0	0.107497	0	0	0.0352274	0	0
ENST00000382225.3|ENSG00000205890.3|OTTHUMG00000177453.1|OTTHUMT00000436993.1|ENST00000382225|ENSG00000205890|3061	3.061	0	0	1	3	0	0	4	1.30676	0	0	0	0	0.0093195	0.00500353	0	0	0	0.0114564	0	0	0	0	0.0154034	0	0	0	0	0	0	0
ENST00000400362.4|ENSG00000223768.4|OTTHUMG00000090403.3|OTTHUMT00000496787.1|LINC00205-201|LINC00205|7553	7.553	0	0	0	1	0	3	4	0.529591	1.65857	1.83098	0.242669	0.449352	1.72e-07	3.54521	2.67384	2.24527	0	0.0381502	0	0.183462	0.282632	0.126355	4.32513	4.6713	0.307442	0	0.777126	0.826215	2.71822	1.21309
ENST00000408887.3|ENSG00000221949.6|OTTHUMG00000169983.2|OTTHUMT00000406740.2|LINC01465-201|LINC01465|1940	1.94	1	0	1	2	0	0	4	2.06186	0.27426	0.199461	0.241643	0.0781321	0.304986	0.365947	0.0181482	0.14817	2.20512	2.64667	0.336423	0.531739	0.253648	0.607979	0.377074	0.308048	11.8789	5.41366	1.3075	1.55441	1.57398	0.967925
ENST00000409786.1|ENSG00000222033.1|OTTHUMG00000154054.1|OTTHUMT00000333672.1|LINC01124-201|LINC01124|2117	2.117	2	0	1	1	0	0	4	1.88947	0.586194	0.324662	0	0	0	0.620796	0.253372	0.401559	0.15466	0	0	0	0.00592725	0	5.3528	4.80474	31.2686	20.0374	7.42151	5.1669	1.7263	1.66415
ENST00000414544.1|ENSG00000235865.2|OTTHUMG00000020586.1|OTTHUMT00000053874.1|GSN-AS1-201|GSN-AS1|4763	4.763	0	0	1	2	0	1	4	0.839807	0.0164019	0	0.0462368	0.0358851	0.262681	0.257337	0.00448376	0.00527862	0.0657387	0	0	0.0208333	0	0	0.0294389	0.0237646	0.425736	0.762947	0.0178108	0.0411437	0.0144473	0.0178551
ENST00000415556.2|ENSG00000235296.2|OTTHUMG00000154387.1|OTTHUMT00000335007.1|ENST00000415556|ENSG00000235296|2483	2.483	0	0	2	2	0	0	4	1.61095	0.012986	0.00837938	0.0256053	0.042683	0	0.0595388	0	0.00478112	0	0	0	0	0	0.0223917	0	0.0235815	0	0.0259525	0.0601018	0	0	0
ENST00000416860.3|ENSG00000238164.6|OTTHUMG00000000818.3|OTTHUMT00000002185.2|TNFRSF14-AS1-201|TNFRSF14-AS1|3542	3.542	0	0	2	2	0	0	4	1.12931	0	0	0	0.0203904	0	0	0	0	0	0.178035	0	0	0.0715418	0	0.154686	0	0	0	0.0439845	0	0.251074	0
ENST00000422679.1|ENSG00000227518.5|OTTHUMG00000019418.1|OTTHUMT00000051446.1|MIR1302-9HG-201|MIR1302-9HG|2923	2.923	1	0	1	1	0	1	4	1.36846	0.0204463	0	0.139175	0.261803	0	0	0	0	0.473777	0.86188	0	0.108123	0	0	0	0	0.271032	0.225596	0.049493	0	0	0.102007
ENST00000422956.6|ENSG00000189223.15|OTTHUMG00000153340.15|OTTHUMT00000330808.3|PAX8-AS1-202|PAX8-AS1|11799	11.799	1	0	0	0	0	3	4	0.339012	0.0180051	0	0	0	0.0566781	0	0.0597324	0.0212818	0.0155346	0	0	0	0	0	0	0	0	0	0	0	0	0
ENST00000424774.2|ENSG00000227959.2|OTTHUMG00000009528.1|OTTHUMT00000026325.1|EPHA2-AS1-201|EPHA2-AS1|1758	1.758	1	0	1	2	0	0	4	2.27531	0	0	0.0512237	0.0436033	0.145402	0.549816	0	0	0.0694088	0.164759	0	0	0	0	0.189358	0.275151	0	1.74841	0.430055	0.870763	0.568799	1.04987
ENST00000427076.5|ENSG00000214783.9|OTTHUMG00000186388.2|OTTHUMT00000473169.1|POLR2J4-202|POLR2J4|6466	6.466	0	0	2	1	0	1	4	0.61862	0.0930303	0.0813538	0.126595	0.108543	0.799993	1.17823	0.466413	0.599731	0.132129	0.156659	0.164068	0.0984202	0.16295	0.109216	0.126308	0.160168	0.217263	0.300346	0.407159	0.938383	0.450553	0.527903
ENST00000427229.2|ENSG00000243349.2|OTTHUMG00000018074.2|OTTHUMT00000470688.1|ENST00000427229|ENSG00000243349|3637	3.637	0	0	1	0	1	2	4	1.09981	0	0	0	0.0156897	0	0.0338639	0	0.0115751	0	0	0	0.0280855	0	0	0	0	0	0	0	0	0	0
ENST00000429019.4|ENSG00000228919.5|OTTHUMG00000043201.5|OTTHUMT00000101519.3|ENST00000429019|ENSG00000228919|1296	1.296	0	0	2	2	0	0	4	3.08642	0	0	0	0	0	0	0	0	0	0	0	0	0	0	0	0	0	0	0	0	0	0
ENST00000433310.6|ENSG00000232855.7|OTTHUMG00000078747.6|OTTHUMT00000171732.3|ENST00000433310|ENSG00000232855|6103	6.103	0	0	0	0	0	4	4	0.655415	0.0148445	0	0	0	0	0.0204078	0.00578936	0	0	0.0211808	0	0	0	0	0.0123334	0.024414	0	0	0	0.0116856	0	0.0155375
ENST00000433433.1|ENSG00000229743.6|OTTHUMG00000153064.3|OTTHUMT00000329325.1|LINC01159-201|LINC01159|3103	3.103	0	0	1	2	0	1	4	1.28908	0	0	0	0	0	0	0	0	0	0	0	0	0	0	0	0	0	0	0	0	0	0
ENST00000434301.1|ENSG00000230393.1|OTTHUMG00000153210.1|OTTHUMT00000330101.1|ENST00000434301|ENSG00000230393|2586	2.586	1	0	1	2	0	0	4	1.54679	0	0	0	0	0	0	0	0	0	0	0	0	0	0	0	0	0	0	0	0	0	0
ENST00000436140.2|ENSG00000231422.2|OTTHUMG00000017831.3|OTTHUMT00000047247.2|LINC01516-201|LINC01516|2992	2.992	0	0	0	0	1	3	4	1.3369	0	0	0	0	0	0	0	0	0	0	0	0	0	0	0	0	0	0	0	0	0	0
ENST00000444037.1|ENSG00000240219.1|OTTHUMG00000040691.1|OTTHUMT00000097796.1|ENST00000444037|ENSG00000240219|2219	2.219	1	0	0	0	1	2	4	1.80261	0	0	0	0	0	0.0315205	0	0	0	0	0	0	0	0	0	0	0	0	0.0344862	0	0	0
ENST00000446874.5|ENSG00000290758.1|-|OTTHUMT00000339613.1|ENST00000446874|ENSG00000290758|3193	3.193	0	0	1	3	0	0	4	1.25274	0.0810683	0.0502401	0	0	0	0.0451841	0.00478763	0.119525	0	0	0	0.0266029	0.0128832	0.0176556	0.0478643	0.0498742	0	0	0	0	0.102962	0.0305604
ENST00000447119.3|ENSG00000237512.7|OTTHUMG00000018423.2|OTTHUMT00000048542.2|UNC5B-AS1-201|UNC5B-AS1|717	0.717	0	0	2	2	0	0	4	5.5788	0.198529	0.0568157	0	0	0	0	0	0.0590255	0	0	0	0	0	0	0	0.0993316	0	0	0	0	0	0
ENST00000448049.1|ENSG00000188660.5|OTTHUMG00000086866.2|OTTHUMT00000195624.1|LINC00319-202|LINC00319|3507	3.507	0	0	2	2	0	0	4	1.14058	0	0	0	0	0	0	0	0	0	0	0	0	0	0	0.00667352	0	0	0	0	0	0	0
ENST00000451317.2|ENSG00000233183.3|OTTHUMG00000014537.17|OTTHUMT00000040212.3|ENST00000451317|ENSG00000233183|3630	3.63	0	0	1	2	0	1	4	1.10193	0	0	0	0	0	0.0161153	0	0	0	0	0	0	0	0	0	0	0	0	0	0	0	0
ENST00000451762.4|ENSG00000180769.10|OTTHUMG00000141281.8|OTTHUMT00000280506.3|WDFY3-AS2-202|WDFY3-AS2|6593	6.593	1	0	0	1	0	2	4	0.606704	0.00916147	0	0	0	0	0.0216319	0.0136152	0.0171514	0	0.0341312	0.00771329	0	0	0.0281994	0.0107792	0.00480497	0	0	0	0.00683108	0.0163767	0.0286073
ENST00000453026.7|ENSG00000223960.9|OTTHUMG00000154423.5|OTTHUMT00000335154.3|CHROMR-206|CHROMR|2366	2.366	2	0	0	0	0	2	4	1.69062	0.702819	0.574351	0.10644	0.0818405	1.76707	0.628186	1.01068	0.269724	0.301877	1.31308	0.584212	1.67312	1.84589	2.32112	0.13113	0.379515	0	0	0.435593	0.0944187	0.582024	0.347665
ENST00000454196.1|ENSG00000234696.1|OTTHUMG00000024165.1|OTTHUMT00000060873.1|GPR50-AS1-201|GPR50-AS1|1620	1.62	1	0	1	2	0	0	4	2.46914	0	0	0	0	0	0	0	0	0	0	0	0	0	0	0	0	0	0	0	0	0	0
ENST00000455929.1|ENSG00000233061.1|OTTHUMG00000009973.1|OTTHUMT00000027639.1|TTLL7-IT1-201|TTLL7-IT1|2921	2.921	1	0	0	0	0	3	4	1.36939	0	0.020349	0	0.160404	0	0	0	0	0	0.234247	0	0.320388	0.0147162	0.27525	0	0	0.231759	0	0.0222622	0.0381007	0	0
ENST00000457402.1|ENSG00000235407.1|OTTHUMG00000022783.2|OTTHUMT00000059079.2|CYMP-AS1-201|CYMP-AS1|2351	2.351	0	0	1	3	0	0	4	1.7014	0	0	0	0	0	0	0	0	0	0	0	0	0	0	0	0	0	0	0	0	0	0
ENST00000458001.2|ENSG00000233695.2|OTTHUMG00000017396.2|OTTHUMT00000045949.2|GAS6-AS1-201|GAS6-AS1|7169	7.169	0	0	1	2	1	0	4	0.557958	0	0.00724406	0	0	0	0	0	0	0	0.0249931	0	0	0	0.0339623	0.00187174	0.0049426	0	0.00725173	0.00557989	0.00536688	0.00929082	0
ENST00000458180.1|ENSG00000224614.2|OTTHUMG00000155738.2|OTTHUMT00000341447.1|TNK2-AS1-203|TNK2-AS1|2096	2.096	0	0	1	3	0	0	4	1.9084	0.047858	0	0.0692263	0.0801353	0.140065	0.42058	0.0331822	0.0427748	0.277012	0.633985	0.0212467	0.244387	0	0	0.0115531	0	0.219973	0	0	0	0	0
ENST00000460754.1|ENSG00000272610.1|OTTHUMG00000186069.1|OTTHUMT00000472174.1|MAGI1-IT1-201|MAGI1-IT1|2567	2.567	0	1	0	0	0	3	4	1.55824	0	0	0	0	0	0	0	0.0187287	0	0	0	0	0	0	0	0	1.28952	0	0	0	0	0
ENST00000473358.1|ENSG00000243485.5|OTTHUMG00000000959.2|OTTHUMT00000002840.1|MIR1302-2HG-202|MIR1302-2HG|712	0.712	1	0	1	1	0	1	4	5.61798	0	0	0	0	0	0	0	0.0340354	0	0	0	0	0	0	0.0408509	0	0.088901	0.378376	0	0	0	0
ENST00000473798.2|ENSG00000225880.6|OTTHUMG00000141258.2|OTTHUMT00000280398.2|LINC00115-201|LINC00115|3312	3.312	1	0	1	1	0	1	4	1.20773	0.806433	0.839349	2.32397	3.59045	20.3814	5.09946	2.08756	3.45838	23.7171	23.118	1.83727	4.91106	2.26975	3.26827	0.576196	0.414536	14.866	8.76691	1.16428	0.600254	1.76322	0.841962
ENST00000499227.6|ENSG00000246366.7|OTTHUMG00000164429.3|OTTHUMT00000378742.2|LACTB2-AS1-201|LACTB2-AS1|3716	3.716	1	0	0	0	1	2	4	1.07643	0	0	0	0	0	0.0516558	0	0	0	0	0	0	0.00251348	0	0	0	0	0	0	0	0	0
ENST00000500118.4|ENSG00000246089.5|OTTHUMG00000163617.3|OTTHUMT00000374529.1|MCPH1-DT-201|MCPH1-DT|2437	2.437	1	0	2	0	0	1	4	1.64136	0.236469	0.759126	0	4.07e-08	0	0	0.170961	2.46852	0.246716	0.39739	0.172149	0	0	0	0.176863	0	0	0	0	0	0	0.0642476
ENST00000501050.1|ENSG00000246095.2|OTTHUMG00000160090.1|OTTHUMT00000359164.1|LINC01096-201|LINC01096|1263	1.263	1	0	2	1	0	0	4	3.16706	0	0	0	0	0	0	0	0	0	0	0	0	0	0	0	0	0	0	0	0.0791208	0	0.178172
ENST00000501338.5|ENSG00000247121.8|OTTHUMG00000162867.2|OTTHUMT00000370858.1|ENST00000501338|ENSG00000247121|2245	2.245	1	0	1	1	0	1	4	1.78174	0.231257	0.306734	0.339178	0.317719	1.32655	1.17063	0.562961	1.57143	3.67761	2.1927	0.651821	0.696758	0.472554	0.430309	0.417186	0.258258	3.83237	0.964109	1.29918	0.634504	0.673657	0.78787
ENST00000503611.5|ENSG00000248429.5|OTTHUMG00000161654.6|OTTHUMT00000365616.3|GASK1B-AS1-201|GASK1B-AS1|2917	2.917	0	0	1	0	1	2	4	1.37127	0	0	0	0	0	0.0153472	0	0	0	0	0	0	0	0	1.28397	1.29347	0.594329	0.490836	1.3283	1.81024	3.53802	2.65745
ENST00000504820.2|ENSG00000249494.6|OTTHUMG00000162961.2|OTTHUMT00000371175.2|DMXL1-DT-201|DMXL1-DT|4375	4.375	1	0	0	0	0	3	4	0.914286	0	0	0	0	0	0	0	0	0	0	0	0	0	0	0.00529719	0	0	0	0	0	0	0
ENST00000505153.2|ENSG00000250493.2|OTTHUMG00000166092.1|OTTHUMT00000387802.1|ENST00000505153|ENSG00000250493|6314	6.314	1	0	0	0	0	3	4	0.633513	0	0.00528423	0	0	0	0	0	0	0	0	0	0	0	0	0	0	0	0	0	0	0	0
ENST00000506601.1|ENSG00000248332.6|OTTHUMG00000165692.1|OTTHUMT00000385827.1|TUB-AS1-201|TUB-AS1|2021	2.021	0	0	1	1	1	1	4	1.97922	0	0	0	0	0	0.00894991	0	0	0	0	0	0	0	0	0	0	0	0	0	0	0	0
ENST00000508713.1|ENSG00000250069.1|OTTHUMG00000163412.1|OTTHUMT00000373269.1|ENST00000508713|ENSG00000250069|3025	3.025	1	0	0	0	0	3	4	1.32231	0	0.0833699	2.37732	4.34725	18.6265	2.92818	0	0	3.71949	3.52313	2.88683	3.41222	1.19646	3.16093	0.0484815	0	2.77749	1.69409	0.495324	1.11781	0.293881	0.276742
ENST00000512693.1|ENSG00000249476.2|OTTHUMG00000162848.2|OTTHUMT00000370753.1|ENST00000512693|ENSG00000249476|5471	5.471	0	0	1	1	0	2	4	0.731128	0.234792	0.13857	0.305256	0.671403	2.2032	0.86096	0.0301364	0.00967154	5.17686	4.95636	1.52098	2.72876	0.372011	1.54216	0.211551	0	4.79996	8.98924	3.69542	8.15041	1.22932	2.72452
ENST00000526704.6|ENSG00000230724.9|OTTHUMG00000165114.4|OTTHUMT00000381923.2|LINC01001-201|LINC01001|2553	2.553	0	0	0	4	0	0	4	1.56678	0.0210792	0	1.7901	2.0852	5.81292	12.6832	1.24651	1.35331	0.297735	0.731226	0.2089	0.396929	0.300736	0.234652	0	0	0	0	0	0	0.018017	0
ENST00000530490.3|ENSG00000290957.1|-|OTTHUMT00000387319.2|ENST00000530490|ENSG00000290957|1332	1.332	0	0	1	1	0	2	4	3.003	NA	NA	NA	NA	NA	NA	NA	NA	NA	NA	NA	NA	NA	NA	NA	NA	NA	NA	NA	NA	NA	NA
ENST00000532597.6|ENSG00000255435.7|OTTHUMG00000166407.3|OTTHUMT00000389623.2|TTC36-AS1-203|TTC36-AS1|2069	2.069	1	0	0	0	2	1	4	1.9333	0	0	0	0	0	0	0	0	0	0	0	0	0	0	0.0195362	0	0	0	0	0	0	0.0924169
ENST00000548760.2|ENSG00000257167.3|OTTHUMG00000170209.3|OTTHUMT00000407972.3|TMPO-AS1-202|TMPO-AS1|3357	3.357	0	0	2	0	0	2	4	1.19154	0	0	9.9e-10	0.661093	5.98401	0	0.0615486	0.0631533	3.61216	3.9925	0	1.60592	0	1.3012	0	0	0	0.00185829	0.368531	0	0.83412	0.3225
ENST00000553259.1|ENSG00000258334.1|OTTHUMG00000169733.1|OTTHUMT00000405659.1|TROAP-AS1-201|TROAP-AS1|4166	4.166	0	0	1	3	0	0	4	0.960154	0.0144251	0	0.0569986	0.0502112	0.189836	0.329666	0.011939	0.00626729	0	0.135764	0	0	0.00543705	0.00974165	0	0	0	0.084013	0	0	0	0
ENST00000553639.1|ENSG00000258730.1|OTTHUMG00000171263.1|OTTHUMT00000412683.1|ITPK1-AS1-201|ITPK1-AS1|4701	4.701	0	0	1	2	1	0	4	0.850883	0	0	0	0	0	0.0141125	0	0	0	0.0561185	0	0	0	0.0167244	0	0	0	0	0	0	0	0
ENST00000557373.1|ENSG00000258738.1|OTTHUMG00000170792.1|OTTHUMT00000410376.1|BAZ1A-AS1-201|BAZ1A-AS1|2117	2.117	0	0	2	2	0	0	4	1.88947	0.979381	0.874831	0.256022	0.195118	1.73115	0.531259	0.317098	0.831629	3.29829	3.56456	1.96076	2.01336	1.6924	2.18077	3.28004	3.61306	12.8186	5.71535	12.2149	10.944	4.15296	7.42692
ENST00000558208.1|ENSG00000259175.1|OTTHUMG00000172165.1|OTTHUMT00000417158.1|ENST00000558208|ENSG00000259175|2520	2.52	0	0	0	1	1	2	4	1.5873	0	0	0	0	0	0	0	0	0	0	0	0.0429	0	0	0	0	0	0	0	0	0	0
ENST00000559946.1|ENSG00000259230.1|OTTHUMG00000171913.1|OTTHUMT00000415849.1|LINC02323-201|LINC02323|1603	1.603	1	0	1	2	0	0	4	2.49532	1.26524	1.60622	0	0	0	4.18216	0.62477	5.36908	0	0	0.0605852	0	0.0419559	0	1.98273	2.36982	0.407829	1.08298	1.17045	0.67971	0.390036	0.422343
ENST00000561542.1|ENSG00000259994.1|OTTHUMG00000176157.1|OTTHUMT00000431578.1|ENST00000561542|ENSG00000259994|3241	3.241	1	0	0	0	0	3	4	1.23419	0.550516	0.389089	0.562115	1.28816	2.8874	0.689808	0.654924	0.218984	10.0872	9.58182	4.89474	4.83254	5.19851	4.43244	0.566769	0.817263	4.91067	5.1259	3.0067	3.8334	1.75886	4.78431
ENST00000561778.2|ENSG00000261754.2|OTTHUMG00000175768.2|OTTHUMT00000431047.2|ENST00000561778|ENSG00000261754|2757	2.757	1	0	0	0	0	3	4	1.45085	0.260855	0.174678	0.00696229	0.032533	0	0.135984	0.168666	0.0761542	0	0	0.22096	0.018095	0.536216	0.351962	0	0	0	0	0	0	0	0.00818943
ENST00000563777.1|ENSG00000260852.1|OTTHUMG00000176767.1|OTTHUMT00000255534.2|FBXL19-AS1-201|FBXL19-AS1|3951	3.951	0	0	1	2	0	1	4	1.0124	1.0448	0.941029	2.67978	2.58048	9.90083	12.9078	2.5349	2.88967	4.23758	5.53528	3.40504	3.50725	3.57934	3.50493	2.01577	1.16902	19.2091	20.9027	5.60667	8.30751	4.01764	6.88971
ENST00000564224.1|ENSG00000261215.1|OTTHUMG00000170835.1|OTTHUMT00000410636.1|ENST00000564224|ENSG00000261215|3264	3.264	0	0	2	2	0	0	4	1.22549	0.149577	0.143586	0.245762	0.22076	1.66329	1.12e-06	0.0420195	0.11542	0.568791	0	0	0	0.364608	0.215326	0	0.0249789	0.480054	0	0	0	0.0674489	0
ENST00000564237.2|ENSG00000290792.1|-|OTTHUMT00000498321.1|ENST00000564237|ENSG00000290792|6440	6.44	0	0	0	0	0	4	4	0.621118	2.50418	2.15416	5.1573	9.67716	35.9672	7.64407	4.10094	1.20005	43.5258	39.7498	7.81091	18.041	6.79116	20.611	1.27784	0.627319	25.8747	17.6356	3.52068	4.82448	2.32308	4.38598
ENST00000564541.1|ENSG00000261366.1|OTTHUMG00000175933.1|OTTHUMT00000431287.1|MANEA-DT-201|MANEA-DT|2268	2.268	1	0	0	0	0	3	4	1.76367	0.66	0.551983	2.02371	3.42128	13.1001	3.38483	0.869014	0.0976924	24.0108	31.5031	3.84636	9.69026	1.49726	5.3574	0.392481	0.181965	17.6638	13.1865	2.24897	2.01825	0.306334	0.330404
ENST00000565467.1|ENSG00000260807.7|OTTHUMG00000172822.3|OTTHUMT00000420706.2|CEROX1-206|CEROX1|3726	3.726	1	0	1	2	0	0	4	1.07354	NA	NA	NA	NA	NA	NA	NA	NA	NA	NA	NA	NA	NA	NA	NA	NA	NA	NA	NA	NA	NA	NA
ENST00000567832.1|ENSG00000260855.1|OTTHUMG00000176476.1|OTTHUMT00000432176.1|ENST00000567832|ENSG00000260855|3472	3.472	0	0	0	0	0	4	4	1.15207	0.22766	0.156577	1.50323	2.54073	12.6061	3.74891	0.135363	0.0405749	5.29675	8.39437	1.91574	3.28508	0.841347	1.73321	0.701396	0.297436	14.9517	12.3284	6.97632	8.8628	8.51786	10.2249
ENST00000568768.5|ENSG00000291025.1|-|OTTHUMT00000431504.1|ENST00000568768|ENSG00000291025|6624	6.624	0	0	1	3	0	0	4	0.603865	0.731345	0.655572	0.612566	0.392809	6.55586	2.4802	0.0244253	0.199155	0.0170456	0	0.248772	0.0363678	0.232541	0.0327667	0	0	0	0	0	0	0	0
ENST00000568885.2|ENSG00000260816.2|OTTHUMG00000176931.2|OTTHUMT00000434352.2|ENST00000568885|ENSG00000260816|4284	4.284	0	0	0	0	0	4	4	0.933707	0	0	0	0	0	0	0	0	0	0	0	0	0	0	0	0	0	0	0.684224	1.21414	0	0.414348
ENST00000569832.5|ENSG00000261713.7|OTTHUMG00000172831.1|OTTHUMT00000420783.1|SSTR5-AS1-204|SSTR5-AS1|2864	2.864	0	0	2	2	0	0	4	1.39665	0	0	0	0	0	0	0	0	0	0	0.0262556	0.0704977	0	0.0170054	0	0.0585821	0	0	0.0393869	0.0180993	0.0611804	0.0121312
ENST00000570140.1|ENSG00000261799.1|OTTHUMG00000172900.1|OTTHUMT00000421260.1|ENST00000570140|ENSG00000261799|3170	3.17	0	0	0	0	0	4	4	1.26183	0.913912	0.882537	1.02488	1.73171	7.88209	1.75514	1.24813	0.295762	6.55519	10.3912	3.94626	5.31759	4.72266	6.10486	1.91494	2.41876	18.3349	17.1703	8.4433	14.6034	6.46388	13.1403
ENST00000570269.2|ENSG00000259976.3|OTTHUMG00000175755.2|OTTHUMT00000431034.2|ENST00000570269|ENSG00000259976|15214	15.214	0	0	0	0	0	4	4	0.262916	0	0.0147184	0	0	0	0	0	0.000909305	0	0	0	0.0729688	0.0200837	0.185829	0.237389	0.001803	1.69744	2.58626	1.67708	2.15032	0	0
ENST00000571452.1|ENSG00000263278.2|OTTHUMG00000182019.1|OTTHUMT00000458687.1|ENST00000571452|ENSG00000263278|4204	4.204	1	1	0	0	1	1	4	0.951475	0	0	0	0.00791673	0	0	0	0	0	0	0	0	0	0	0	0	0	0	0	0	0	0
ENST00000573103.2|ENSG00000262075.3|OTTHUMG00000188592.1|OTTHUMT00000477690.1|DKFZP434A062-201|DKFZP434A062|5021	5.021	1	0	1	1	1	0	4	0.796654	0	0.0400678	0.0291784	0.0282938	0.16577	0.764115	0.031799	0.0191258	0.143445	0.0783688	0	0	0.0121875	0.0155655	0	0	0.0401905	0	0	0	0	0
ENST00000576365.1|ENSG00000261997.1|OTTHUMG00000177970.1|OTTHUMT00000440031.1|ENST00000576365|ENSG00000261997|3828	3.828	0	0	0	0	0	4	4	1.04493	0.203983	0.122295	0.0826142	0.124113	0.0937593	0.0272414	0.0294509	0	0.121669	0.249192	0.439007	1.18615	0.149059	1.21254	0.17462	0.0290804	2.04817	1.477	0.984722	0.894456	0.0361672	0
ENST00000577698.2|ENSG00000265100.2|OTTHUMG00000179801.1|OTTHUMT00000448260.1|ENST00000577698|ENSG00000265100|1313	1.313	1	0	1	1	0	1	4	3.04646	0.551395	0.36725	1.25522	1.64423	1.54424	2.12261	0.514896	0.814087	8.74745	5.99712	0.781755	1.5962	0.968787	0.55294	0.486682	0.151134	6.57756	5.15821	0.768703	0.786683	0.919939	0.786214
ENST00000578427.1|ENSG00000264707.1|OTTHUMG00000178852.1|OTTHUMT00000443624.1|L3MBTL4-AS1-201|L3MBTL4-AS1|2044	2.044	1	0	0	0	0	3	4	1.95695	0	0	0.0253431	0.0185207	0	0	0	0	0	0	0	0	0	0.0438036	0	0	0	0	0	0	0	0
ENST00000580891.1|ENSG00000266805.1|OTTHUMG00000178671.1|OTTHUMT00000442872.1|ENST00000580891|ENSG00000266805|3485	3.485	0	0	0	0	0	4	4	1.14778	0	0	0.652379	1.18132	7.22415	0	0	0	0	0	0.307235	1.27006	0	1.24626	0	0	0	0	0.133046	0	0.0842608	0
ENST00000580942.1|ENSG00000264954.2|OTTHUMG00000178593.3|OTTHUMT00000442607.1|PRR29-AS1-202|PRR29-AS1|2926	2.926	0	0	1	2	1	0	4	1.36705	0	0	0.0385105	0.0934931	0.0722977	0.0758639	0.0113911	0	0.0513086	0.0476509	0	0.121607	0	0	0.00807965	0	0	0	0.0247167	0	0	0
ENST00000580979.1|ENSG00000264456.1|OTTHUMG00000179051.1|OTTHUMT00000444570.1|ENST00000580979|ENSG00000264456|1661	1.661	1	0	0	0	0	3	4	2.40819	0	0	0	0	0	0.0515712	0	0	0.0495176	0.0902543	0	0	0	0.15762	0	0	0	0	0	0.0322807	0.0438755	0.0367981
ENST00000581080.1|ENSG00000265666.1|OTTHUMG00000179631.1|OTTHUMT00000447446.1|RARA-AS1-201|RARA-AS1|1790	1.79	0	0	2	2	0	0	4	2.23464	0.843208	1.15639	0.0437168	0	0	0	1.21988	4.50144	0.386963	0	0.306137	0.442579	0.481037	0.156958	0.370717	0.504786	0.181033	0.426244	0.298096	0.423603	0.0919644	0.0739281
ENST00000581719.3|ENSG00000265179.9|OTTHUMG00000178281.4|OTTHUMT00000441339.2|ENST00000581719|ENSG00000265179|3904	3.904	1	0	1	2	0	0	4	1.02459	0.0201498	0	0	0	0	0	0.00831886	0	0	0	0	0	0.0160489	0.0128368	0	0	0	0	0	0	0	0
ENST00000583864.3|ENSG00000225194.4|OTTHUMG00000020288.3|OTTHUMT00000442499.2|LINC00092-203|LINC00092|1872	1.872	2	0	0	1	0	1	4	2.13675	0	0	0	0	0	0	0	0	0	0	0	0	0	0	0	0	0	0	0.0427865	0	0	0
ENST00000584772.1|ENSG00000265489.1|OTTHUMG00000178329.1|OTTHUMT00000441565.1|ARHGAP44-AS1-201|ARHGAP44-AS1|3679	3.679	0	0	0	0	2	2	4	1.08725	0	0	0	0	0	0	0	0	0	0	0	0	0	0	0	0	0	0	0	0	0	0
ENST00000588040.1|ENSG00000267152.1|OTTHUMG00000182110.1|OTTHUMT00000459508.1|ENST00000588040|ENSG00000267152|1360	1.36	1	0	0	0	0	3	4	2.94118	0	0	0	0	0.287	0	0.0635966	0	1.66463	1.11685	1.84216	2.72913	1.12958	1.73845	0	0	1.28259	2.46822	2.3225	4.06033	0.738759	1.51279
ENST00000589496.2|ENSG00000267520.2|OTTHUMG00000179927.2|OTTHUMT00000448990.2|ENST00000589496|ENSG00000267520|5702	5.702	2	0	0	0	0	2	4	0.701508	0	0	0	0	0	0	0	0	0	0	0	0	0	0	0	0	0	0	0	0	1.03e-09	0
ENST00000589723.1|ENSG00000267287.1|OTTHUMG00000180269.1|OTTHUMT00000450522.1|ENST00000589723|ENSG00000267287|4167	4.167	0	0	0	4	0	0	4	0.959923	0	0	0	0	0	0	0	0	0	0	0	0	0	0	0	0	0	0	0	0	0	0
ENST00000599109.5|ENSG00000268230.5|OTTHUMG00000183515.1|OTTHUMT00000466957.1|ENST00000599109|ENSG00000268230|3322	3.322	3	0	0	0	0	1	4	1.20409	0.0176045	0.0122336	0.00970656	0	0.132891	0.0566836	0	0.0499971	0	0	0	0	0	0	0	0	0.300865	0	0.1611	0.208372	0.292069	0
ENST00000600534.1|ENSG00000267858.8|OTTHUMG00000183549.3|OTTHUMT00000467109.1|MZF1-AS1-202|MZF1-AS1|2567	2.567	0	0	2	1	0	1	4	1.55824	0.0869319	0.220257	0	0	0.112027	0.0296414	0.210343	0.533766	0	0	0	0	0	0	0.430222	1.03908	0	0	0	0	0.0936841	0.126132
ENST00000601375.1|ENSG00000290776.1|-|OTTHUMT00000464523.1|ENST00000601375|ENSG00000290776|790	0.79	0	0	0	0	2	2	4	5.06329	0	0	0	0	0	0	0	0	0	0	0	0	0	0	0	0	0	0	0	0	0	0
ENST00000601500.1|ENSG00000259663.2|OTTHUMG00000171880.2|OTTHUMT00000465790.1|ISL1-DT-203|ISL1-DT|6762	6.762	0	0	1	1	0	2	4	0.591541	0	0	0	0	0	0	0	0	0	0	0	0	0	0	0	0	0	0	0	0	0	0
ENST00000602502.1|ENSG00000270021.1|OTTHUMG00000171136.2|OTTHUMT00000411869.2|ENST00000602502|ENSG00000270021|2017	2.017	0	0	2	1	0	1	4	1.98314	0.323668	0.208649	0.231459	0.130966	0.584276	0.280304	0.196573	0.111796	1.28375	0.890076	0.24027	0.225058	0.172663	0.267218	0.0120462	0	0.230798	0.211801	0.155506	0.0740188	0.078827	0.0317929
ENST00000603791.1|ENSG00000270504.1|OTTHUMG00000185108.1|OTTHUMT00000469606.1|ENST00000603791|ENSG00000270504|2761	2.761	1	0	1	2	0	0	4	1.44875	0	0	0	0	0	0	0	0	0	0.0509584	0	0	0	0	0.902178	0.736888	2.05019	2.89391	2.11732	2.94006	1.42277	3.18251
ENST00000605200.1|ENSG00000271119.1|OTTHUMG00000185137.1|OTTHUMT00000469651.1|ENST00000605200|ENSG00000271119|1661	1.661	2	0	0	0	1	1	4	2.40819	0	0	1.07e-09	0.0137693	0	0	0.00734686	0	0	0	0	0	0	0	0.0248427	0.0313459	0.359234	0.401452	0	0	0.148244	0
ENST00000605794.5|ENSG00000270580.5|OTTHUMG00000168168.2|OTTHUMT00000398563.1|PKD1P6-NPIPP1-202|PKD1P6-NPIPP1|2902	2.902	0	0	2	2	0	0	4	1.37836	2.06301	2.40898	7.45259	5.3118	39.1872	72.9812	3.90837	5.62877	3.29668	1.55566	0.943383	1.11165	2.14303	1.01729	1.89504	1.82401	1.27606	1.11577	1.78026	1.91495	3.78095	5.4856
ENST00000606771.2|ENSG00000272269.2|OTTHUMG00000185678.1|OTTHUMT00000470978.1|NUP153-AS1-201|NUP153-AS1|1251	1.251	1	0	1	2	0	0	4	3.19744	1.16405	1.47085	0.354271	0.2256	0.628602	1.15412	1.12621	4.40984	3.30993	2.2351	1.06782	0.749357	1.4916	1.61057	0.719342	0.806246	4.41439	1.21604	1.05226	0.984688	1.598	1.38512
ENST00000607058.2|ENSG00000272163.2|OTTHUMG00000185424.2|OTTHUMT00000470495.2|ENST00000607058|ENSG00000272163|2555	2.555	1	0	1	1	0	1	4	1.56556	0	0	0	0	0	0	0	0	0	0	0	0	0	0	0	0	0	0	0	0	0	0
ENST00000608412.1|ENSG00000273319.1|OTTHUMG00000186335.1|OTTHUMT00000472960.1|ENST00000608412|ENSG00000273319|3198	3.198	0	0	1	0	0	3	4	1.25078	0.0124045	0	0.0156206	0.0113615	0.0443678	0.0212038	0	0	0	0	0	0	0	0	0.286794	0.180181	1.32972	1.78923	0.66863	1.19764	0.0226097	0.294406
ENST00000608430.2|ENSG00000272668.2|OTTHUMG00000192504.1|OTTHUMT00000494810.1|ENST00000608430|ENSG00000272668|7134	7.134	0	1	1	2	0	0	4	0.560695	0	0	0.00263181	0	0	0	0	0	0	0	0	0	0	0	0	0	0	0	0	0	0	0
ENST00000608694.2|ENSG00000273329.2|OTTHUMG00000186330.1|OTTHUMT00000472943.1|ENST00000608694|ENSG00000273329|7124	7.124	1	1	0	0	0	2	4	0.561482	1.40902	1.2646	7.45058	9.96903	30.9541	18.338	1.37034	0.709842	28.0844	26.4373	4.75731	6.63612	2.16406	3.66839	1.87466	0.52595	38.9968	27.4744	4.32207	3.4972	1.2814	0.973548
ENST00000609200.2|ENSG00000272692.2|OTTHUMG00000186431.2|OTTHUMT00000473138.2|ENST00000609200|ENSG00000272692|1905	1.905	0	0	1	1	0	2	4	2.09974	0	0	0.0273971	0.0797275	0.233405	0	0.0247181	0.0159325	0.0626694	0	0	0	0	0.0478574	0.0838804	0	1.23931	0	0.705789	0.255168	0.551454	0.328156
ENST00000609975.2|ENSG00000272913.2|OTTHUMG00000186024.1|OTTHUMT00000472064.1|ENST00000609975|ENSG00000272913|1882	1.882	1	0	0	2	0	1	4	2.1254	0.130808	0.112427	0.0138848	0	0	0.0757236	0.0376087	0.0404025	0	0	0	0	0	0	0	0	0	0.0770872	0.0424918	0	0.0430728	0
ENST00000610494.1|ENSG00000278291.1|OTTHUMG00000187101.2|OTTHUMT00000474417.2|ENST00000610494|ENSG00000278291|4412	4.412	0	0	1	1	0	2	4	0.906618	0.0621287	0.0610465	0.0500807	0.0404695	0.31676	0.105576	0.119179	0.219436	0.825854	0.240579	0.0966855	0.203913	0.196387	0.08965	1.0292	1.29935	3.01009	1.44434	1.45628	1.08876	1.25761	0.885982
ENST00000612330.2|ENSG00000277969.2|OTTHUMG00000188496.1|OTTHUMT00000477429.1|ENST00000612330|ENSG00000277969|2299	2.299	0	0	3	1	0	0	4	1.73989	3.19977	3.82342	2.71803	2.88478	6.07419	8.5792	4.5023	7.81092	10.4428	7.71666	3.68118	3.44872	6.24589	4.28408	2.64472	2.45923	19.7294	13.9305	6.17284	6.33403	2.41007	2.84398
ENST00000612496.1|ENSG00000275512.1|OTTHUMG00000178602.2|OTTHUMT00000442658.2|ENST00000612496|ENSG00000275512|2533	2.533	0	0	0	0	1	3	4	1.57916	0	0	0	0.0145937	0	0	0	0	0	0	0.0303382	0	0.0525237	0	0.00949016	0.0232274	0.261986	0.106837	0.176018	0.28056	0.238018	0.168854
ENST00000614781.1|ENSG00000276980.1|OTTHUMG00000186561.1|OTTHUMT00000473352.1|ENST00000614781|ENSG00000276980|1357	1.357	0	0	1	1	1	1	4	2.94768	0	0	0.0230171	0.3835	0.693935	0.799187	0.00418623	0.088022	0.655958	0.836622	0.168954	0.0588439	0.0136619	0.116477	0	0.851845	56.7506	33.4326	17.9071	18.6484	36.2341	26.8583
ENST00000617035.1|ENSG00000274092.1|OTTHUMG00000186828.1|OTTHUMT00000473856.1|ENST00000617035|ENSG00000274092|715	0.715	1	0	1	2	0	0	4	5.59441	0	0	0	0	0	0.124818	0	0	0	0	0	0	0	0	0	0	1.22141	1.49849	0	0.190139	0	0.160852
ENST00000618081.6|ENSG00000291090.1|-|OTTHUMT00000131970.3|CCDC144BP-208|CCDC144BP|8700	8.7	0	0	0	0	0	4	4	0.45977	0.0884348	0.0812045	0.00548064	0.00805861	0.330705	0.00950702	0.00374394	0	0	0	0.049858	0.00324911	0.000516417	0.107979	0	0.000828804	0.0376784	0	0	0	0	0.00146518
ENST00000619092.1|ENSG00000276248.1|OTTHUMG00000187227.1|OTTHUMT00000474606.1|ENST00000619092|ENSG00000276248|3362	3.362	2	0	0	0	0	2	4	1.18977	0.113418	0	0.606861	1.21693	7.39081	1.85246	0.385598	0.0658586	0.644254	0.574089	1.11878	2.0219	0.207714	2.03987	0	0.0344462	0.682698	0.276655	0.3658	1.23759	0.499356	0.126694
ENST00000620192.1|ENSG00000260337.4|OTTHUMG00000173074.5|OTTHUMT00000422054.2|ENST00000620192|ENSG00000260337|3815	3.815	0	0	0	0	0	4	4	1.04849	0	0	0	0	0	0	0	0	0	0	0	0	0.0164646	0	0	0	0	0	0	0	0	0
ENST00000620769.1|ENSG00000275897.1|OTTHUMG00000186663.1|OTTHUMT00000473572.1|ENST00000620769|ENSG00000275897|2573	2.573	2	0	1	1	0	0	4	1.55461	0	0	0.0690107	0.0143424	0.0560002	0.134023	0	0	0	0	0.0595572	0.0418525	0	0.0662503	0.0927951	0	3.53657	3.35547	1.38186	3.05677	1.54746	3.07828
ENST00000620778.1|ENSG00000277837.1|OTTHUMG00000172421.1|OTTHUMT00000418461.1|ENST00000620778|ENSG00000277837|4980	4.98	1	0	1	2	0	0	4	0.803213	0	0	0	0	0	0	0	0	0	0	0	0	0	0	0	0	0	0	0	0	0	0
ENST00000621230.1|ENSG00000276791.1|OTTHUMG00000177359.2|OTTHUMT00000436445.2|ENST00000621230|ENSG00000276791|3250	3.25	0	0	1	1	1	1	4	1.23077	1.38512	1.1534	3.25528	4.08762	5.75706	11.171	0.957421	1.66139	8.09745	7.48078	0.453885	0.733756	0.472902	0.454466	0.947089	0.584568	9.46385	5.34915	0.52504	0.356934	0.532634	0.505828
ENST00000621575.1|ENSG00000276672.1|OTTHUMG00000187333.1|OTTHUMT00000474777.1|ENST00000621575|ENSG00000276672|4636	4.636	1	0	0	0	0	3	4	0.862813	1.18447	0.703345	1.43665	2.01251	11.0628	2.68201	0.87913	0.771164	12.8861	15.7565	8.43558	8.30406	7.53001	8.5922	1.81498	1.65458	13.3777	7.59127	15.1662	9.10656	10.3302	5.59175
ENST00000622438.1|ENSG00000273618.1|OTTHUMG00000187059.1|OTTHUMT00000474351.1|ENST00000622438|ENSG00000273618|1686	1.686	0	0	1	3	0	0	4	2.37248	0	0	0	0	0	0.0983611	0	0	0	0	0	0.0577741	0.0376041	0	0	0	0	0	0	0	0	0
ENST00000622936.1|ENSG00000278954.1|OTTHUMG00000179963.1|OTTHUMT00000449097.1|ENST00000622936|ENSG00000278954|2466	2.466	0	0	2	2	0	0	4	1.62206	0.0326326	0.056102	0.0825771	0.105119	0.469056	0.224594	0.0321666	0.0710803	1.92047	1.27992	0.187944	0.264136	0.352362	0.627178	0.00969433	0	0.180353	0.0551615	0	0	0.0307303	0.0249021
ENST00000622996.1|ENSG00000279432.1|OTTHUMG00000185903.1|OTTHUMT00000471670.1|ENST00000622996|ENSG00000279432|3122	3.122	0	0	0	0	0	4	4	1.28123	0.0608136	0.0530245	5.2221	9.45562	19.7675	7.77422	0.143529	0.0768142	3.92276	4.18953	1.20125	2.90613	0.673359	2.19222	0.191999	0.062945	3.68449	2.80253	1.29808	0.238015	0.837952	0.525745
ENST00000623096.1|ENSG00000280309.1|OTTHUMG00000177186.1|OTTHUMT00000435765.1|ENST00000623096|ENSG00000280309|5025	5.025	0	0	2	2	0	0	4	0.79602	0	0	0	0	0	0	0	0	0	0	0	0	0	0	0	0	0	0	0	0	0	0
ENST00000623206.1|ENSG00000278975.1|OTTHUMG00000176672.1|OTTHUMT00000433076.1|ENST00000623206|ENSG00000278975|1676	1.676	1	0	0	1	0	2	4	2.38663	0.0236097	0	0	0	0	0	0	0	0	0	0	0	0	0	0	0	0	0	0	0	0	0
ENST00000623279.1|ENSG00000280117.1|OTTHUMG00000168553.1|OTTHUMT00000400218.1|ENST00000623279|ENSG00000280117|4394	4.394	0	0	0	0	1	3	4	0.910332	0.00939605	0.00767697	0.358227	0.521636	1.36533	0.879098	0	0.00314854	0.73476	0.573939	0.113309	0.432425	0.183176	0.198119	0.0106099	0.0129231	0	0	0.046688	0.0149817	0	0.0257962
ENST00000623323.1|ENSG00000279481.1|OTTHUMG00000161591.1|OTTHUMT00000365465.1|ENST00000623323|ENSG00000279481|2525	2.525	1	1	0	0	0	2	4	1.58416	0	0	0	0.0476465	0	0.013744	0	0	0	0	0	0.0271939	0	0	0	0	0.650493	0.712425	0.59753	0.180241	0.259101	0
ENST00000623357.1|ENSG00000280305.1|OTTHUMG00000173436.1|OTTHUMT00000423100.1|ENST00000623357|ENSG00000280305|3446	3.446	0	0	0	0	1	3	4	1.16077	0	0	0	0	0	0	0	0	0.0621141	0.276914	0.0212319	0.119392	0	0.0472438	0.00679764	0	0	0.0373396	0	0	0	0
ENST00000623443.1|ENSG00000280417.1|OTTHUMG00000159078.1|OTTHUMT00000353206.1|ENST00000623443|ENSG00000280417|1957	1.957	0	0	1	2	0	1	4	2.04394	0.229889	0.269442	0.106363	0.15476	0.22654	0.398632	0.077846	0.192987	0.72706	0.847022	0.0831849	0.116872	0.107536	0.138768	0.074699	0.0610245	1.31868	0.66009	0.282831	0.115308	0.327681	0.0990409
ENST00000623613.1|ENSG00000280177.1|OTTHUMG00000178975.1|OTTHUMT00000444184.1|ENST00000623613|ENSG00000280177|2777	2.777	0	0	3	1	0	0	4	1.4404	0	0	0.00908127	0	0	0.0987083	0	0	0	0.0506177	0	0	0	0	0	0	0	0	0	0	0	0
ENST00000623722.1|ENSG00000278917.1|OTTHUMG00000182207.1|OTTHUMT00000460021.1|ENST00000623722|ENSG00000278917|4179	4.179	0	0	0	0	0	4	4	0.957167	0.0187979	0	0.0706771	0.128523	0.702676	0.0479024	0.0180428	0	0.0751417	0.287268	0.32507	0.457042	0.133989	0.285546	0.0559679	0	0.491732	0.421014	0.806306	0.791709	0.116876	0.204463
ENST00000623760.1|ENSG00000279712.1|OTTHUMG00000189277.1|OTTHUMT00000479265.1|ENST00000623760|ENSG00000279712|9537	9.537	0	0	0	2	2	0	4	0.419419	0	0	0	0	0	0.118672	0.000101498	0	0	0	0	0	0	0	0	0.00405478	0	0.00943033	0	0	0	0
ENST00000623947.1|ENSG00000280025.1|OTTHUMG00000189180.1|OTTHUMT00000479002.1|ENST00000623947|ENSG00000280025|4254	4.254	1	0	0	0	0	3	4	0.940291	0	0	0	0	0	0	0	0	0.131159	0.0970443	0.0549971	0.034948	0.155238	0.209963	0	0	0	0	0	0	0	0
ENST00000623958.1|ENSG00000279212.1|OTTHUMG00000176144.1|OTTHUMT00000431565.1|ENST00000623958|ENSG00000279212|2535	2.535	1	2	0	1	0	0	4	1.57791	0	0.0716484	0.323604	0.544835	0.0639621	0.292776	0.0225447	0.0963637	1.06136	1.35321	0	0	0	0.0436366	0.0655812	0.138381	3.83884	1.06112	0.0969926	0.0251173	0.0553441	0.130984
ENST00000623980.1|ENSG00000279110.1|OTTHUMG00000189169.1|OTTHUMT00000478989.1|ENST00000623980|ENSG00000279110|13120	13.12	0	0	1	2	0	1	4	0.304878	0	0	0	0.00264249	0	0	0	0	0	0	0	0	0	0	0.00172129	0	0	0	0	0	0	0
ENST00000623981.1|ENSG00000278950.1|OTTHUMG00000176514.1|OTTHUMT00000432374.1|ENST00000623981|ENSG00000278950|2256	2.256	0	0	0	0	1	3	4	1.77305	0	0	0.234082	0.853035	1.588	0.0371822	0.202368	0.0575173	0	0	0	0	0	0	0	0	0.54484	1.11537	0.393577	0.611215	0.282629	0.0756165
ENST00000624147.1|ENSG00000279133.1|OTTHUMG00000179252.1|OTTHUMT00000445467.1|ENST00000624147|ENSG00000279133|3819	3.819	1	0	0	0	0	3	4	1.04739	0.866281	0.794184	4.83996	8.93021	12.35	3.91143	0.58118	0.322723	3.43866	1.04836	1.55966	2.75144	0.982656	1.55985	3.74317	4.19113	6.4853	2.80982	4.38562	2.51191	6.16285	4.10846
ENST00000624384.1|ENSG00000280202.1|OTTHUMG00000165347.2|OTTHUMT00000383537.2|ENST00000624384|ENSG00000280202|1697	1.697	1	0	0	0	0	3	4	2.3571	0.990732	0.640124	0.122468	0.575256	0	0	3.38447	1.88049	0	0	3.39996	1.90439	5.27716	4.57537	0.00534896	0	0.019829	0	0.170969	0.176588	0.181819	0.209598
ENST00000624418.1|ENSG00000280222.1|OTTHUMG00000175756.1|OTTHUMT00000431035.1|ENST00000624418|ENSG00000280222|6473	6.473	1	0	1	1	1	0	4	0.617951	0	0	0	0	0	0	0	0	0	0	0	0	0	0	0	0	0	0	0	0	0	0
ENST00000624705.2|ENSG00000279602.2|OTTHUMG00000176042.2|OTTHUMT00000431415.2|ENST00000624705|ENSG00000279602|1329	1.329	2	1	0	0	0	1	4	3.00978	0.151449	0.44881	0.027675	0	0	0.190336	0.0840797	0.0311773	0.643007	0.959129	0.497591	0.856356	0.510613	1.30099	11.0689	4.06621	200.185	103.728	10.9147	13.2321	15.2576	31.6954
ENST00000624917.1|ENSG00000279161.1|OTTHUMG00000175773.1|OTTHUMT00000431052.1|ENST00000624917|ENSG00000279161|2352	2.352	1	1	0	1	0	1	4	1.70068	0	0	0.195662	0.252951	1.91339	1.27135	0.0630213	0.0687392	0.241919	0.246192	0.0663149	0.232984	0.114682	0.0368813	0	0	0	0	0	0.061314	0	0.0263522
ENST00000624926.1|ENSG00000279388.1|OTTHUMG00000168305.1|OTTHUMT00000399229.1|ENST00000624926|ENSG00000279388|4191	4.191	0	2	0	0	1	1	4	0.954426	0	0	0	0	0	0	0	0	0.000264009	0	0	0	0	0	0	0	0	0	0	0	0	0
ENST00000625127.3|ENSG00000279762.3|OTTHUMG00000189117.2|OTTHUMT00000478844.2|ENST00000625127|ENSG00000279762|3153	3.153	0	0	2	2	0	0	4	1.26863	0.0503603	0.082995	0.0979806	0.188803	0.509838	0.177326	0	0	0	0	0	0	0	0	0.0487449	0	0.192937	0	0.0581845	0	0.0196719	0
ENST00000625268.2|ENSG00000280776.2|OTTHUMG00000189552.2|OTTHUMT00000479955.2|LINC01202-201|LINC01202|4388	4.388	0	0	0	0	0	4	4	0.911577	0.0072385	0.0069487	0	0	0	0	0	0	0	0	0	0	0	0	0	0	0	0	0	0.0396538	0	0
ENST00000627173.1|ENSG00000281852.1|OTTHUMG00000189559.1|OTTHUMT00000479962.1|LINC00891-201|LINC00891|4113	4.113	0	0	0	0	0	4	4	0.972526	0.0190886	0.0246169	0.238424	0.261063	4.39439	0.524145	0.0288402	0.0168962	0.0282315	0	0.196413	0.441562	0.265879	0.273513	0.00564884	0	0	0	0	0	0	0
ENST00000627498.2|ENSG00000291217.1|-|OTTHUMT00000481523.1|LINC01347-205|LINC01347|3841	3.841	0	0	1	3	0	0	4	1.0414	0.523028	0.463789	1.57721	0.91443	10.3397	9.84814	0.613304	0.843545	3.52539	3.18634	1.71791	1.78216	1.89327	1.92496	0.0639117	0.0195195	0	0	0.00807619	0.0174171	0.0145146	0.045129
ENST00000627566.1|ENSG00000280650.1|OTTHUMG00000189553.1|OTTHUMT00000479956.1|KCNIP4-IT1-201|KCNIP4-IT1|9848	9.848	0	0	0	0	0	4	4	0.406174	0	0.00298279	0	0.00187546	0	0.00213798	0	0	0	0.00882352	0	0	0	0	0.00317989	0	0	0	0	0	0	0
ENST00000628855.1|ENSG00000281332.1|OTTHUMG00000189740.1|OTTHUMT00000481619.1|LINC00997-201|LINC00997|2646	2.646	0	0	1	1	1	1	4	1.51172	0.302842	0.273348	0.937433	2.48382	8.20478	1.37813	0.755782	0.525411	8.49924	8.35364	6.10748	6.88344	4.06735	5.41595	0.321498	0.198277	9.12031	11.6138	6.31972	9.85802	7.87798	10.081
ENST00000630447.1|ENSG00000280639.1|OTTHUMG00000189720.1|OTTHUMT00000481345.1|LINC02204-201|LINC02204|3206	3.206	0	0	0	0	0	4	4	1.24766	0.0340597	0.0559642	0.0436815	0	0	0	0.0507011	0.0114562	0	0.062765	0	0.0625488	0.0372971	0	0.0202151	0.00480492	0	0	0.0317975	0	0.102445	0
ENST00000633055.1|ENSG00000279663.3|OTTHUMG00000191354.1|OTTHUMT00000487695.1|ENST00000633055|ENSG00000279663|4006	4.006	0	0	0	0	0	4	4	0.998502	0	0	0	0	0	0	0	0	0	0.100329	0	0.0252097	0.0155976	0.159603	0	0	0	0	0	0	0	0
ENST00000635687.1|ENSG00000228526.8|OTTHUMG00000001762.6|OTTHUMT00000488406.2|MIR34AHG-204|MIR34AHG|4211	4.211	1	1	0	1	1	0	4	0.949893	0.0084969	0.0160159	0.0938964	0.0886751	0.397183	0.344814	0.0329979	0.0197701	0.00737465	0.121417	0.00636118	0.00253957	0.0107719	0.0741895	6.26848	0.937972	4.2292	6.56405	1.51073	5.10118	0.18767	1.21494
ENST00000636668.1|ENSG00000283638.2|OTTHUMG00000191855.1|OTTHUMT00000490838.1|ENST00000636668|ENSG00000283638|3863	3.863	1	1	0	0	0	2	4	1.03546	0	0	0	0	0	0	0	0	0	0	0	0	0	0	0	0	0	0	0	0	0	0
ENST00000638776.2|ENSG00000283743.2|OTTHUMG00000191999.2|OTTHUMT00000491902.2|ENST00000638776|ENSG00000283743|3761	3.761	0	0	2	1	1	0	4	1.06355	0	0	0	0	0.185983	0.134501	0	0.0141313	0	0.0050212	0	0	0	0	0	0	0	0	0	0	0	0
ENST00000639346.1|ENSG00000279588.2|OTTHUMG00000192058.1|OTTHUMT00000492118.1|ENST00000639346|ENSG00000279588|3773	3.773	0	0	0	0	2	2	4	1.06016	0	0	0	0	0	0	0	0	0	0	0	0	0	0	0	0	0	0	0	0	0	0
ENST00000641135.1|ENSG00000290702.1|-|OTTHUMT00000493543.1|ENST00000641135|ENSG00000290702|1506	1.506	1	0	0	0	1	2	4	2.65604	0	0	0	0	0	0	0	0	0	0	0	0	0	0.0651696	0	0	0	0	0	0	0	0
ENST00000642028.1|ENSG00000290695.1|-|OTTHUMT00000493478.1|ENST00000642028|ENSG00000290695|5216	5.216	1	0	0	0	0	3	4	0.766871	0	0	0	0	0	0	0	0	0	0	0	0	0	0	0	0	0	0	0	0	0	0
ENST00000643016.1|ENSG00000284848.2|OTTHUMG00000168496.15|OTTHUMT00000494395.1|LINC02359-203|LINC02359|5493	5.493	0	0	0	0	0	4	4	0.7282	0	0	0	0	0	0.011185	0	0	0	0	0	0	0	0	0	0	0	0	0	0	0.0247302	0
ENST00000649072.1|ENSG00000285811.1|OTTHUMG00000192870.1|OTTHUMT00000499428.1|ENST00000649072|ENSG00000285811|3685	3.685	1	0	0	0	0	3	4	1.08548	0	0	0	0	0	0	0	0	0	0	0	0	0	0	0	0	0	0	0	0	0	0
ENST00000649288.1|ENSG00000182257.8|OTTHUMG00000150407.1|OTTHUMT00000317994.1|PRR34-201|PRR34|2817	2.817	1	0	1	2	0	0	4	1.41995	0	0	0	0	0	0	0	0	0	0	0	0	0	0	0	0	0	0	0	0	0	0
ENST00000649858.3|ENSG00000291088.1|-|OTTHUMT00000499434.1|NPEPPSP1-204|NPEPPSP1|1832	1.832	1	1	1	1	0	0	4	2.18341	NA	NA	NA	NA	NA	NA	NA	NA	NA	NA	NA	NA	NA	NA	NA	NA	NA	NA	NA	NA	NA	NA
ENST00000651403.1|ENSG00000224271.8|OTTHUMG00000150321.16|OTTHUMT00000502267.1|EPIC1-230|EPIC1|7916	7.916	0	3	0	0	0	1	4	0.505306	0.010544	0.0171899	0.014586	0.00523653	0.0393117	0.0608483	0.247582	0.0336299	0	0	0	0.0156923	0	0	0	0	0	0	0	0	0	0
ENST00000652926.1|ENSG00000286937.1|OTTHUMG00000195632.1|OTTHUMT00000527903.1|ENST00000652926|ENSG00000286937|1873	1.873	1	0	0	0	0	3	4	2.13561	0	0	0	0	0	0	0	0	0	0	0	0	0	0	0	0	0	0	0	0	0	0
ENST00000653247.1|ENSG00000259341.2|OTTHUMG00000171950.2|OTTHUMT00000504903.1|ENST00000653247|ENSG00000259341|11392	11.392	0	0	0	2	1	1	4	0.351124	0	0	0	0	0	0.00567031	0	0	0	0	0	0	0	0	0	0	0	0	0.0056274	0	0	0
ENST00000655601.2|ENSG00000286482.2|OTTHUMG00000193846.1|OTTHUMT00000505316.1|ENST00000655601|ENSG00000286482|3981	3.981	2	0	0	2	0	0	4	1.00477	0.582489	0.424396	1.28901	1.53243	3.94308	2.31905	0.162918	0.265977	6.47503	6.36468	0.270841	0.533101	0.157059	0.522335	0.169485	0.0572751	3.21786	1.52358	0.0521185	0.183807	0.0528813	0.0863
ENST00000655874.1|ENSG00000227486.4|OTTHUMG00000021664.6|OTTHUMT00000523055.1|ENST00000655874|ENSG00000227486|4651	4.651	0	0	0	0	0	4	4	0.86003	0	0	0	0	0	0	0	0	0	0	0	0	0	0.0238339	0.00481201	0	0.108921	0	0.0210198	0	0	0
ENST00000656748.1|ENSG00000286470.1|OTTHUMG00000195178.1|OTTHUMT00000524993.1|ENST00000656748|ENSG00000286470|1837	1.837	0	0	1	1	1	1	4	2.17746	0	0	0	0	0	0	0	0	0	0	0.041524	0	0.0775891	0	0	0	0	0.0736633	0.129863	0.124939	0	0
ENST00000658072.1|ENSG00000245275.9|OTTHUMG00000163570.7|OTTHUMT00000504979.1|SAP30L-AS1-207|SAP30L-AS1|4591	4.591	0	0	0	0	0	4	4	0.87127	0	0	0	0	0	0	0	0	0	0	0	0	0	0	0	0	0	0	0	0	0	0
ENST00000659121.1|ENSG00000237298.11|OTTHUMG00000133536.16|OTTHUMT00000446058.3|TTN-AS1-276|TTN-AS1|6297	6.297	1	0	0	0	0	3	4	0.635223	0.0203228	0.00694068	0.00862973	0.0125538	0.16496	0.0646515	0	0	0	0	0.0119922	0	0.0555913	0	0	0	0	0	0	0.0111882	0	0.0194026
ENST00000659278.1|ENSG00000287109.1|OTTHUMG00000194645.1|OTTHUMT00000520282.1|ENST00000659278|ENSG00000287109|3590	3.59	0	0	0	0	0	4	4	1.11421	0	0.00945096	0	0	0	0.00598316	0.00303583	0	0	0.0377824	0.0348228	0.0204341	0	0.0387319	0	0	0	0	0	0	0.00720263	0
ENST00000659778.1|ENSG00000286976.1|OTTHUMG00000195024.1|OTTHUMT00000523796.1|ENST00000659778|ENSG00000286976|4179	4.179	1	0	0	0	1	2	4	0.957167	0	0	0.0117801	0.0171352	0	0.00123781	0	0	0.0500945	0	0	0.0240549	0.0148876	0	0.00555696	0	0	0	0	0	0	0
ENST00000660072.1|ENSG00000247796.3|OTTHUMG00000162191.4|OTTHUMT00000527154.1|MOCS2-DT-207|MOCS2-DT|5930	5.93	1	2	0	0	0	1	4	0.674536	0.103661	0.131018	0.0235776	0.022632	0.40026	0.114563	0.187719	0.12497	0.0378441	0	0.0354821	0	0.0224505	0.0567022	0.0521472	0.120179	0	0	0	0.0381811	0	0.0209483
ENST00000660705.1|ENSG00000287477.1|OTTHUMG00000194851.1|OTTHUMT00000522602.1|ENST00000660705|ENSG00000287477|3082	3.082	0	0	1	1	0	2	4	1.29786	0	0	0	0	0	0	0	0	0	0	0	0	0	0	0	0	0	0	0	0	0	0
ENST00000661028.1|ENSG00000287907.1|OTTHUMG00000194944.1|OTTHUMT00000523321.1|ENST00000661028|ENSG00000287907|3361	3.361	0	0	0	0	0	4	4	1.19012	0	0	0	0	0	0	0	0	0	0	0	0	0	0	0	0	0	0	0	0	0	0
ENST00000661319.1|ENSG00000287356.1|OTTHUMG00000193849.2|OTTHUMT00000505327.2|ENST00000661319|ENSG00000287356|5675	5.675	1	0	1	2	0	0	4	0.704846	0	0.00937529	0	0	0.0363902	0.0319048	0	0.00788685	0	0	0	0.0172298	0	0	0.0250457	0.0332363	0	0	0	0	0	0.0293076
ENST00000661802.1|ENSG00000286786.1|OTTHUMG00000195373.1|OTTHUMT00000526667.1|ENST00000661802|ENSG00000286786|6449	6.449	0	0	0	0	0	4	4	0.620251	0.25634	0.125682	0.00320872	0.203404	1.83848	0	9.98e-06	0.0293995	0.262084	3.55291	0.0174552	10.1474	1.42446	9.11873	0	0.0957016	1.41625	3.14788	3.71639	2.46317	0.992484	1.22151
ENST00000662667.1|ENSG00000242628.6|OTTHUMG00000151893.2|OTTHUMT00000528213.1|ENST00000662667|ENSG00000242628|4658	4.658	1	0	0	0	0	3	4	0.858738	0	0	0	0	0	0.0284976	0.00459124	0	0	0	0	0.00816975	0.0132212	0	0	0	0	0.0266793	0.0145908	0	0.0296119	0
ENST00000663390.1|ENSG00000286327.1|OTTHUMG00000194701.1|OTTHUMT00000521000.1|ENST00000663390|ENSG00000286327|3341	3.341	0	0	0	0	1	3	4	1.19725	0	0	0.234964	1.16029	1.66943	1.36853	0	0	0	0.134313	0	0	0.212961	0	0	0.0631503	0	0	0.149864	0.00265707	0	0.006044
ENST00000665660.1|ENSG00000234775.2|OTTHUMG00000043020.2|OTTHUMT00000527733.1|ENST00000665660|ENSG00000234775|2819	2.819	0	0	2	2	0	0	4	1.41894	0	0	0	0	0	0	0	0	0	0	0	0	0	0	0	0	0	0	0	0	0	0
ENST00000666115.1|ENSG00000288015.1|OTTHUMG00000194965.1|OTTHUMT00000523454.1|ENST00000666115|ENSG00000288015|2230	2.23	1	0	0	0	0	3	4	1.79372	0	0	0	0	0.110316	0.0313491	0	0	0	0.0235321	0	0	0.00580615	0	0	0	0	0	0	0	0	0
ENST00000666926.1|ENSG00000255197.7|OTTHUMG00000167691.2|OTTHUMT00000522640.1|ENST00000666926|ENSG00000255197|2732	2.732	0	0	0	1	1	2	4	1.46413	NA	NA	NA	NA	NA	NA	NA	NA	NA	NA	NA	NA	NA	NA	NA	NA	NA	NA	NA	NA	NA	NA
ENST00000667135.1|ENSG00000204860.5|OTTHUMG00000019948.3|OTTHUMT00000522588.1|FAM201A-205|FAM201A|3072	3.072	0	0	0	1	0	3	4	1.30208	NA	NA	NA	NA	NA	NA	NA	NA	NA	NA	NA	NA	NA	NA	NA	NA	NA	NA	NA	NA	NA	NA
ENST00000667245.1|ENSG00000281128.2|OTTHUMG00000189560.2|OTTHUMT00000523188.1|PTENP1-AS-202|PTENP1-AS|3941	3.941	0	0	0	1	0	3	4	1.01497	0.086482	0.0332862	0	0	0.0959811	0	0	0.00175943	0	0.171525	0.127769	0.16049	0	0	0	0	0	0	0	0	0	0
ENST00000667590.2|ENSG00000231811.4|OTTHUMG00000014165.6|OTTHUMT00000527696.1|ENST00000667590|ENSG00000231811|3695	3.695	0	0	0	0	0	4	4	1.08254	NA	NA	NA	NA	NA	NA	NA	NA	NA	NA	NA	NA	NA	NA	NA	NA	NA	NA	NA	NA	NA	NA
ENST00000668194.1|ENSG00000287671.1|OTTHUMG00000195190.1|OTTHUMT00000525178.1|ENST00000668194|ENSG00000287671|7037	7.037	0	0	0	0	0	4	4	0.568424	0	0	0	0.00862147	0	0.0273859	0	0	0.014276	0	0	0	0	0	0.00242286	0	0	0.0170978	0	0	0	0
ENST00000669335.1|ENSG00000288565.1|OTTHUMG00000153065.3|OTTHUMT00000528852.1|ENST00000669335|ENSG00000288565|4963	4.963	0	0	0	0	1	3	4	0.805964	0	0	0	0	0	0	0	0	0	0	0	0	0	0	0	0	0	0	0	0	0	0
ENST00000670132.1|ENSG00000286282.1|OTTHUMG00000195531.1|OTTHUMT00000527435.1|ENST00000670132|ENSG00000286282|4224	4.224	0	0	0	0	0	4	4	0.94697	NA	NA	NA	NA	NA	NA	NA	NA	NA	NA	NA	NA	NA	NA	NA	NA	NA	NA	NA	NA	NA	NA
ENST00000670210.1|ENSG00000287232.1|OTTHUMG00000195784.1|OTTHUMT00000528735.1|ENST00000670210|ENSG00000287232|2594	2.594	1	0	1	1	1	0	4	1.54202	0.0118885	0	0	0	0	0	0	0	0	0	0	0	0	0	0.0268507	0	0	0	0	0	0	0
ENST00000670595.1|ENSG00000286551.1|OTTHUMG00000194972.1|OTTHUMT00000523487.1|ENST00000670595|ENSG00000286551|2232	2.232	1	0	0	1	0	2	4	1.79211	0	0	0	0	0	0	0	0	0	0	0	0	0	0	0	0	0	0	0	0	0	0
ENST00000670804.1|ENSG00000232685.5|OTTHUMG00000016475.6|OTTHUMT00000506227.1|LINC00442-204|LINC00442|1276	1.276	0	0	1	2	0	1	4	3.1348	0	0	0	0	0	0	0.0201469	0	0	0	0	0	0	0	0	0	0	0	0	0	0	0
ENST00000685479.1|ENSG00000288739.1|-|-|ENST00000685479|ENSG00000288739|1567	1.567	1	0	1	1	0	1	4	2.55265	0.186409	0.137312	0.341218	0.372415	0.775099	1.35228	0.296387	0.47262	3.38867	2.45721	0.499891	0.312019	0.333258	0.617543	0	0	0	0	0.0542668	0	0	0.0439937
ENST00000685848.1|ENSG00000289594.1|-|-|ENST00000685848|ENSG00000289594|1828	1.828	1	1	0	0	0	2	4	2.18818	0	0	0.100397	0.354779	0.407286	0.273861	0.214053	0.0919828	1.58466	0.671042	0.136083	0.191171	0.0780709	0.100887	0.228077	0	4.97035	2.2408	1.01507	0.628632	0.581544	0.75567
ENST00000685999.2|ENSG00000289144.2|-|-|ENST00000685999|ENSG00000289144|1295	1.295	0	0	2	2	0	0	4	3.0888	0	0	0	0	0	0	0	0	0	0	0	0	0	0	0	0	0	0	0	0	0	0
ENST00000687429.1|ENSG00000289283.1|-|-|ENST00000687429|ENSG00000289283|1309	1.309	1	0	0	0	0	3	4	3.05577	0	0.124902	3.28667	8.86202	20.2081	1.65804	0	0	8.79668	6.10052	3.79389	16.1633	1.52017	21.5318	0.164844	0.0399403	16.5469	9.0292	0.323732	1.42141	0	0
ENST00000687527.1|ENSG00000289054.1|-|-|ENST00000687527|ENSG00000289054|2670	2.67	0	0	0	0	0	4	4	1.49813	0	0	0.00546948	0.00598832	0	0	0	0	0	0	0.0221519	0	0.0181001	0.027589	0	0	0	0	0	0	0	0
ENST00000689170.1|ENSG00000231050.3|OTTHUMG00000000941.1|-|GNB1-DT-204|GNB1-DT|988	0.988	1	0	1	1	0	1	4	4.04858	NA	NA	NA	NA	NA	NA	NA	NA	NA	NA	NA	NA	NA	NA	NA	NA	NA	NA	NA	NA	NA	NA
ENST00000689915.1|ENSG00000289122.2|-|-|ENST00000689915|ENSG00000289122|2393	2.393	1	0	2	1	0	0	4	1.67154	0	0	0	0	0	0	0	0	0	0	0	0	0	0	0	0	0	0	0	0	0	0
ENST00000690000.1|ENSG00000245598.7|OTTHUMG00000165987.1|-|DACT3-AS1-204|DACT3-AS1|2871	2.871	0	0	2	2	0	0	4	1.39324	0.011464	0.00985709	0	0	0	0.125343	0.00137367	0.00512571	0.00205707	0	0.0261811	0	0	0	0	0	0.0635404	0	0	0	0	0
ENST00000690934.1|ENSG00000291142.1|-|-|ENST00000690934|ENSG00000291142|2962	2.962	0	0	0	0	0	4	4	1.35044	NA	NA	NA	NA	NA	NA	NA	NA	NA	NA	NA	NA	NA	NA	NA	NA	NA	NA	NA	NA	NA	NA
ENST00000691930.1|ENSG00000289392.1|-|-|ENST00000691930|ENSG00000289392|1388	1.388	1	0	0	0	0	3	4	2.88184	0	0	0	0	0	0	0	0	0	0	0	0	0	0	0	0	0	0	0	0	0	0
ENST00000692441.2|ENSG00000289222.2|-|-|ENST00000692441|ENSG00000289222|1863	1.863	0	0	2	2	0	0	4	2.14707	0.440847	0.511514	0.940843	1.06255	1.83434	3.79132	0.348878	1.07124	6.12347	7.04301	0.619818	1.18174	0.800417	0.787746	0.236512	0.35424	5.23341	2.34291	0.387497	0.40906	0.0872862	0.491774
ENST00000692606.1|ENSG00000289308.2|-|-|ENST00000692606|ENSG00000289308|1948	1.948	1	0	0	0	1	2	4	2.05339	0	0	0	0	0	0	0	0	0	0	0	0	0	0	0	0	0	0	0	0	0	0
ENST00000695562.1|ENSG00000289688.1|-|-|ENST00000695562|ENSG00000289688|13861	13.861	0	0	0	0	1	3	4	0.288579	0.0694372	0.0531761	0.0195126	0.0245417	0.0498936	0.0241643	0.0333731	0.0268372	0.15496	0.197246	0.0384536	0.0281479	0.0367188	0.0569744	0.0881622	0.0872193	0.013774	0.0098594	0.0137787	0	0.0279742	0.0121418
ENST00000697478.1|ENSG00000289731.1|-|-|FAM153B-201|FAM153B|8121	8.121	0	0	0	0	0	4	4	0.49255	0	0	0	0	0	0	0	0	0	0	0	0	0	0	0	0	0	0	0	0	0	0
ENST00000701128.1|ENSG00000289858.1|-|-|ENST00000701128|ENSG00000289858|1804	1.804	2	1	0	1	0	0	4	2.21729	2.4424	1.96182	1.19357	1.14371	11.6562	4.20935	2.81327	7.44041	10.811	12.027	2.35308	2.52778	2.81818	1.79576	1.3749	1.36795	9.57983	5.86145	2.64936	1.36401	1.82057	1.13451
ENST00000701163.1|ENSG00000282885.3|OTTHUMG00000191575.5|-|ENST00000701163|ENSG00000282885|1348	1.348	1	0	1	1	0	1	4	2.96736	NA	NA	NA	NA	NA	NA	NA	NA	NA	NA	NA	NA	NA	NA	NA	NA	NA	NA	NA	NA	NA	NA
ENST00000702329.1|ENSG00000289987.1|-|-|ENST00000702329|ENSG00000289987|766	0.766	0	0	2	2	0	0	4	5.22193	0	0	0	0	0	0	0	0	0	0	0	0	0	0	0	0	0	0	0	0	0	0
ENST00000285274.9|ENSG00000290687.1|-|OTTHUMT00000131052.3|ZNF286B-202|ZNF286B|5145	5.145	0	0	0	0	0	3	3	0.58309	0	0	0	0	0	0	0	0	0	0	0	0	0.762584	0.914893	0.218523	0.501319	0	0	0.599443	1.18769	0.510241	0.757386
ENST00000319817.3|ENSG00000179755.3|OTTHUMG00000176223.2|OTTHUMT00000431648.2|ENST00000319817|ENSG00000179755|2481	2.481	0	0	1	2	0	0	3	1.20919	0	0	0	0	0	0	0	0	0	0	0	0	0	0	0	0	0	0	0	0	0	0
ENST00000341853.5|ENSG00000290767.1|-|OTTHUMT00000313543.1|ENST00000341853|ENSG00000290767|3831	3.831	0	0	1	1	1	0	3	0.783085	0	0	0	0	0.0377372	0.0180534	0	0	0	0	0	0	0	0	0	0.0134991	0	0	0	0.00375958	0	0
ENST00000377320.3|ENSG00000179840.5|OTTHUMG00000001452.1|OTTHUMT00000004245.1|PIK3CD-AS1-201|PIK3CD-AS1|1823	1.823	0	0	2	1	0	0	3	1.64564	0	0	0	0	0	0	0	0	0	0	0	0	0	0	0	0	0	0	0	0	0	0
ENST00000378417.1|ENSG00000205037.2|OTTHUMG00000175541.1|OTTHUMT00000430445.1|ENST00000378417|ENSG00000205037|3468	3.468	0	0	1	2	0	0	3	0.865052	0	0.00979782	0	0	0	0.0194483	0	0	0	0	0	0	0	0	0	0	0	0	0	0	0	0
ENST00000381796.1|ENSG00000205790.1|OTTHUMG00000182047.1|OTTHUMT00000458999.1|DPP9-AS1-201|DPP9-AS1|3071	3.071	1	0	0	2	0	0	3	0.97688	0.0129429	0.0111267	0	0	0	0	0.00160733	0.00928022	0.00901873	0	0.0242176	0	0	0	0	0	0	0	0	0.00576485	0	0
ENST00000393264.2|ENSG00000213279.2|OTTHUMG00000150298.1|OTTHUMT00000317429.1|ENST00000393264|ENSG00000213279|2379	2.379	0	0	1	1	0	1	3	1.26103	0	0	0	0.312008	0	0	0	0	0	0	0	0	0	0	0	0	0	0	0	0	0	0
ENST00000398469.5|ENSG00000290861.1|-|OTTHUMT00000255984.1|KRT42P-202|KRT42P|2864	2.864	0	1	0	2	0	0	3	1.04749	0	0	0	0	0	0.0181081	0	0.0103838	0.0383663	0	0	0	0	0	0	0	0	0	0	0	0	0
ENST00000399003.1|ENSG00000214797.3|OTTHUMG00000167437.1|OTTHUMT00000394611.1|ENST00000399003|ENSG00000214797|2805	2.805	0	0	0	0	0	3	3	1.06952	0	0	0	0	0	0	0	0	0	0	0	0	0	0	0	0	0	0	0.0109953	0	0	0.0214002
ENST00000399869.1|ENSG00000215246.6|OTTHUMG00000161930.2|OTTHUMT00000366445.2|LINC02982-201|LINC02982|3482	3.482	0	1	0	0	0	2	3	0.861574	0	0.0146446	0	0.00215137	0.090889	0	0.0502111	0.03236	0	0.041936	0.00165067	0.0589982	0.0182312	0.0359324	0.00338749	0	0	0	0.0404271	0.0194155	0.0410143	0
ENST00000400385.2|ENSG00000215458.8|OTTHUMG00000086882.1|OTTHUMT00000195677.1|AATBC-201|AATBC|4598	4.598	0	0	1	2	0	0	3	0.652458	0	0	0	0	0.0492787	0	0	0	0	0	0	0	0	0	0.010013	0	0.088503	0	0.0296018	0	0.030038	0.0122722
ENST00000407635.2|ENSG00000219159.4|OTTHUMG00000152264.2|OTTHUMT00000325630.2|ENST00000407635|ENSG00000219159|3398	3.398	0	0	0	1	0	2	3	0.882872	0.0116419	0	0	0	0	0	0	0	0	0	0	0	0	0	0.0068986	0	0	0	0	0	0	0
ENST00000408988.2|ENSG00000221845.4|OTTHUMG00000155550.1|OTTHUMT00000340616.1|LINC02902-201|LINC02902|2911	2.911	0	0	1	1	1	0	3	1.03057	0	0	0	0	0	0	0	0	0	0	0	0	0	0	0	0	0	0	0	0	0.050446	0
ENST00000411440.5|ENSG00000290769.1|-|OTTHUMT00000339837.1|ENST00000411440|ENSG00000290769|1249	1.249	0	0	2	1	0	0	3	2.40192	0	0	0	0	0	0	0	0	0	0	0	0	0	0	0	0	0	0	0	0	0	0
ENST00000411553.3|ENSG00000228223.3|OTTHUMG00000014456.4|OTTHUMT00000040121.3|HCG11-201|HCG11|5696	5.696	0	2	0	1	0	0	3	0.526685	10.7217	9.6045	2.82041	5.06737	12.6417	3.80275	7.108	4.5421	33.1583	38.7433	12.4117	18.4314	19.9826	24.4312	0.016152	0.0197882	0	0	0.0117146	0.0112983	0.0118886	0.00973052
ENST00000412260.5|ENSG00000290659.1|-|OTTHUMT00000131967.23|ENST00000412260|ENSG00000290659|4329	4.329	0	0	0	0	0	3	3	0.693001	0	0	0	0	0	0	0	0	0.00733632	0	0	0	0	0	0	0	0	0	0	0	0	0
ENST00000413035.5|ENSG00000231871.5|OTTHUMG00000035809.1|OTTHUMT00000087101.1|IPO9-AS1-201|IPO9-AS1|839	0.839	1	0	1	1	0	0	3	3.57569	0.414463	1.00546	0.417212	0.285587	1.42689	1.18687	0.587786	2.4241	3.8251	2.6744	2.51262	1.43928	1.65973	1.19004	0.452373	0.242929	4.19028	0.687374	2.07282	0.763655	1.20944	0.687562
ENST00000413987.1|ENSG00000242125.3|OTTHUMG00000003657.2|OTTHUMT00000474593.1|SNHG3-201|SNHG3|2201	2.201	0	2	0	0	0	1	3	1.36302	50.315	48.9029	56.7642	74.4735	282.182	143.46	489.191	186.791	286.846	193.504	82.1303	87.967	92.4796	57.6523	16.2202	19.071	108.116	94.3609	44.0683	50.694	68.039	50.664
ENST00000414656.1|ENSG00000228544.1|OTTHUMG00000020946.1|OTTHUMT00000055132.1|CCDC183-AS1-201|CCDC183-AS1|2386	2.386	0	0	1	2	0	0	3	1.25733	0.265078	0.108239	0.0638088	0.0491333	0.56016	0.464467	0.152126	0.101977	0	0	0	0.108649	0	0	0.14381	0	0.151383	0.348362	0	0	0	0.154329
ENST00000415675.3|ENSG00000225670.4|OTTHUMG00000037178.4|OTTHUMT00000090334.3|CADM3-AS1-201|CADM3-AS1|5044	5.044	0	1	1	1	0	0	3	0.594766	0	0	0	0	0	0	0	0	0	0.0639046	0	0	0	0	0	0	0	0	0	0	0	0
ENST00000416774.1|ENSG00000223823.1|OTTHUMG00000000827.1|OTTHUMT00000002221.1|LINC01342-201|LINC01342|1620	1.62	0	0	1	2	0	0	3	1.85185	0	0	0	0	0	0	0	0	0	0	0	0	0	0	0.00999704	0	1.32415	2.08312	0.843523	1.01659	1.07083	0.0105787
ENST00000417510.5|ENSG00000290977.1|-|OTTHUMT00000131123.1|ENST00000417510|ENSG00000290977|1873	1.873	1	0	1	1	0	0	3	1.60171	0	0	0	0	0	0	0	0	0	0	0	0	0	0	0	0	0	0	0	0	0	0
ENST00000419766.5|ENSG00000197085.11|OTTHUMG00000153007.5|OTTHUMT00000475243.1|NPSR1-AS1-202|NPSR1-AS1|4821	4.821	0	0	0	0	0	3	3	0.622278	0	0	0	0	0	0	0	0	0	0	0	0	0.00486729	0	2.01067	4.63523	1.88865	2.61687	9.35572	14.5026	9.47807	26.9708
ENST00000420905.1|ENSG00000231560.1|OTTHUMG00000150192.1|OTTHUMT00000316755.1|CLEC12A-AS1-201|CLEC12A-AS1|3956	3.956	1	0	0	0	0	2	3	0.758342	0	0	0	0	0	0	0	0	0	0	0	0	0	0	0	0	0	0	0	0	0	0
ENST00000421331.1|ENSG00000235927.4|OTTHUMG00000040531.4|OTTHUMT00000097547.2|NEXN-AS1-201|NEXN-AS1|2292	2.292	0	0	1	2	0	0	3	1.3089	0	0.0151814	0	0	0	0.0164974	0	0.0171095	0.0862806	0	0	0	0	0	0.0172774	0	0.112933	0	0	0.0660577	0	0.0224657
ENST00000423600.1|ENSG00000229178.1|OTTHUMG00000155836.1|OTTHUMT00000341955.1|ENST00000423600|ENSG00000229178|1684	1.684	2	0	0	0	0	1	3	1.78147	0.147634	0.205284	0.0968166	0.580855	0	0	1.88877	1.8148	0	0	0.112567	0.402256	0.660186	0.0688432	0.329874	0.0544637	0	0	0.0492025	0.0619159	0.456251	0
ENST00000424650.1|ENSG00000224204.1|OTTHUMG00000021240.1|OTTHUMT00000056034.1|PHEX-AS1-201|PHEX-AS1|1906	1.906	1	0	0	0	0	2	3	1.57398	0	0	0	0	0	0	0	0	0	0	0	0	0	0	0	0	0	0	0	0	0	0
ENST00000428207.4|ENSG00000234608.9|OTTHUMG00000141273.9|OTTHUMT00000280462.2|MAPKAPK5-AS1-201|MAPKAPK5-AS1|2290	2.29	0	0	1	2	0	0	3	1.31004	7.73835	7.34939	1.03522	0.905858	7.08885	4.88267	9.89558	4.59173	4.57506	3.6865	23.9061	13.9756	35.4128	21.4742	1.57989	4.31618	1.57712	1.6366	8.48739	5.45259	3.12161	4.26791
ENST00000428709.2|ENSG00000233651.2|OTTHUMG00000067237.2|OTTHUMT00000143935.2|ENST00000428709|ENSG00000233651|3325	3.325	0	0	0	0	0	3	3	0.902256	0	0	0.0149878	0	0	0	0	0	0	0	0	0	0	0	0	0	0	0	0	0	0	0
ENST00000429630.3|ENSG00000232533.3|OTTHUMG00000152694.1|OTTHUMT00000327419.1|FAM131B-AS2-201|FAM131B-AS2|1198	1.198	1	0	1	1	0	0	3	2.50417	1.70118	2.23086	0.549885	0	0	0.379793	1.06788	5.85669	0	1.27996	0.554486	0.829341	2.28182	1.19736	0.998601	0.857021	0.742229	0	0.409484	0.863242	1.65127	2.8904
ENST00000429892.5|ENSG00000212694.8|OTTHUMG00000128905.2|OTTHUMT00000250874.1|LINC01089-202|LINC01089|1521	1.521	1	0	1	1	0	0	3	1.97239	1.55497	1.84913	0.938668	1.00365	5.37547	5.91138	0.276249	0.221689	0.433651	0.228947	0.644715	0.866947	0.430318	0.220508	0.292724	0.613859	0	0.215792	0.255349	0.569304	0.518374	0.481142
ENST00000439004.1|ENSG00000234754.2|OTTHUMG00000037427.15|OTTHUMT00000091116.2|LINC02817-202|LINC02817|4340	4.34	0	0	0	0	0	3	3	0.691244	0	0	0	0	0	0	0	0	0	0	0	0	0	0	0	0	0	0.0636074	0.0252399	0.0166568	0.0973723	0.0607492
ENST00000439824.2|ENSG00000233424.2|OTTHUMG00000058152.2|OTTHUMT00000128846.2|ENST00000439824|ENSG00000233424|3224	3.224	0	0	0	0	0	3	3	0.930521	0	0	0	0	0	0	0	0	0.0334908	0	0	0	0	0	0	0	0	0	0	0	0	0
ENST00000440016.6|ENSG00000237380.7|OTTHUMG00000154174.4|OTTHUMT00000334239.2|HOXD-AS2-202|HOXD-AS2|999	0.999	1	0	1	1	0	0	3	3.003	0	0	0	0	0	0	0	0	0	0	0	0	0	0	0	0	0	0	0	0	0	0
ENST00000441095.2|ENSG00000233922.4|OTTHUMG00000090408.4|OTTHUMT00000206834.2|LINC01694-202|LINC01694|6721	6.721	0	0	0	2	0	1	3	0.446362	7.47188	6.81479	5.97878	4.38234	18.1791	27.6578	17.5271	9.04065	5.79781	6.22802	8.68747	10.0598	14.6663	11.0212	0.197591	0.283974	0.643998	0.488142	0.564587	0.518232	0.575595	0.489652
ENST00000441184.1|ENSG00000225174.2|OTTHUMG00000015320.3|OTTHUMT00000041713.2|OSTM1-AS1-202|OSTM1-AS1|3334	3.334	1	0	1	1	0	0	3	0.89982	0	0	0	0	0	0	0	0	0	0	0	0	0	0	0	0	0	0	0	0	0	0
ENST00000441253.2|ENSG00000290671.1|-|OTTHUMT00000255606.2|PYY2-202|PYY2|1076	1.076	0	0	2	1	0	0	3	2.7881	0	0	0.0345547	0	0	0	0	0.00214482	0	0	0	0.134862	0	0.260178	0.0490123	0.0600949	0	0	0	0.32072	0.483221	0.75916
ENST00000441418.2|ENSG00000237941.2|OTTHUMG00000009942.3|OTTHUMT00000027530.3|KCNQ1DN-201|KCNQ1DN|1093	1.093	1	0	1	1	0	0	3	2.74474	0	0	0	0.0378734	0	0	0	0.0318136	0	0	0	0	0	0	0	0	0	0	0	0	0	0
ENST00000442166.2|ENSG00000224729.6|OTTHUMG00000156674.3|OTTHUMT00000356401.1|PCOLCE-AS1-201|PCOLCE-AS1|2537	2.537	0	0	0	2	1	0	3	1.1825	0	0	0	0	0.199355	0.198111	0.0172802	0.00033393	0	0	0.0746294	0	0.00787626	0.207748	0	0	0.0116628	0	0	0.0182178	0	0
ENST00000443018.3|ENSG00000232721.3|OTTHUMG00000041573.2|OTTHUMT00000099556.2|ENST00000443018|ENSG00000232721|2743	2.743	1	0	0	0	0	2	3	1.09369	0	0	0	0	0	0	0	0	0	0	0	0	0	0.0307186	0	0	0	0	0	0	0	0
ENST00000445345.2|ENSG00000225981.3|OTTHUMG00000151454.1|OTTHUMT00000322715.1|MICALL2-DT-201|MICALL2-DT|1222	1.222	1	0	2	0	0	0	3	2.45499	0.171303	0.126877	0.117894	0	0	0.0503221	0.1425	0.17107	0	0	0	0	0	0	0.0418249	0	0	0	0	0.0728173	0	0
ENST00000447651.1|ENSG00000223486.1|OTTHUMG00000024099.2|OTTHUMT00000060663.2|ENST00000447651|ENSG00000223486|2691	2.691	1	0	1	1	0	0	3	1.11483	0	0	0	0	0	0	0	0	0	0	0	0	0	0	0	0	0.243825	0	0	0.0522398	0.027675	0
ENST00000455963.6|ENSG00000234336.7|OTTHUMG00000152771.3|OTTHUMT00000327759.2|JAZF1-AS1-203|JAZF1-AS1|3748	3.748	0	0	1	1	0	1	3	0.800427	NA	NA	NA	NA	NA	NA	NA	NA	NA	NA	NA	NA	NA	NA	NA	NA	NA	NA	NA	NA	NA	NA
ENST00000456353.5|ENSG00000224596.9|OTTHUMG00000018559.3|OTTHUMT00000048940.1|ZMIZ1-AS1-203|ZMIZ1-AS1|2878	2.878	0	0	1	1	0	1	3	1.04239	0.0712928	0.106672	0.0113212	0	0	0.0299601	0.428623	0.0616369	0	0	0	0	0.0206315	0	0.24749	0.204541	0.0751125	0.208272	0.511067	0.77673	0.311729	0.423034
ENST00000456775.1|ENSG00000227199.1|OTTHUMG00000039524.1|OTTHUMT00000095366.1|ST7-AS1-201|ST7-AS1|1889	1.889	0	0	1	1	0	1	3	1.58814	2.38851	2.12755	0.760515	0.985864	2.51309	2.07373	1.31683	1.57689	9.62749	9.65769	0.913445	1.89438	2.65959	1.25769	1.77295	1.99819	15.2985	6.98167	7.3158	4.46126	5.52977	6.627
ENST00000468186.5|ENSG00000206573.11|OTTHUMG00000164357.11|OTTHUMT00000378422.1|THUMPD3-AS1-202|THUMPD3-AS1|3253	3.253	1	0	0	0	0	2	3	0.922226	NA	NA	NA	NA	NA	NA	NA	NA	NA	NA	NA	NA	NA	NA	NA	NA	NA	NA	NA	NA	NA	NA
ENST00000473572.2|ENSG00000248101.2|OTTHUMG00000181895.1|OTTHUMT00000458193.1|ENST00000473572|ENSG00000248101|1130	1.13	1	0	1	1	0	0	3	2.65487	3.71398	3.74343	2.31779	2.05304	7.32725	12.5125	5.69697	10.1313	3.7592	1.86617	1.91976	1.36505	4.48212	2.04776	1.18966	0.191006	0.893108	0.172819	1.09634	0.565061	1.24521	0.932161
ENST00000477288.5|ENSG00000288473.1|OTTHUMG00000031263.3|OTTHUMT00000076565.2|ENST00000477288|ENSG00000288473|6054	6.054	0	0	2	1	0	0	3	0.49554	0.427189	0.492701	1.20398	0.848032	1.78632	7.97803	0.231234	1.27831	0.612057	0.723118	1.31742	0.24912	3.10126	1.37431	0.113091	0	0.720268	0.464727	1.47423	0.716535	2.32539	2.20167
ENST00000479102.1|ENSG00000290818.1|-|OTTHUMT00000349972.1|ENST00000479102|ENSG00000290818|1990	1.99	0	0	0	0	1	2	3	1.50754	NA	NA	NA	NA	NA	NA	NA	NA	NA	NA	NA	NA	NA	NA	NA	NA	NA	NA	NA	NA	NA	NA
ENST00000484550.1|ENSG00000240859.3|OTTHUMG00000151398.4|OTTHUMT00000322469.1|LINC03014-203|LINC03014|5008	5.008	1	1	0	1	0	0	3	0.599042	0	0	0.00975237	0	0	0	0.00212576	0	0.0616496	0	0	0	0	0.0312188	0.00924461	0	0	0	0	0	0	0
ENST00000484682.2|ENSG00000128254.16|OTTHUMG00000195986.1|-|YWHAH-AS1-201|YWHAH-AS1|2494	2.494	0	0	1	0	1	1	3	1.20289	0.0219275	0	0	0	0	0.0429527	0	0	0	0	0	0	0.053492	0.0289522	0.0466587	0	0	0.0486434	0	0	0	0
ENST00000499418.2|ENSG00000245149.6|OTTHUMG00000165073.3|OTTHUMT00000381699.1|RNF139-DT-201|RNF139-DT|5654	5.654	1	0	0	0	0	2	3	0.530598	0	0	0	0	0	0	0.0106428	0.00417104	0	0.0470553	0	0.0686598	0.079666	0.122835	0.0119062	0.0700661	0.0614248	0	0.141498	0.182747	0.21755	0.164503
ENST00000499521.2|ENSG00000230551.4|OTTHUMG00000163462.2|OTTHUMT00000470933.1|ENST00000499521|ENSG00000230551|8636	8.636	0	0	0	0	0	3	3	0.347383	3.40868	2.60291	3.48649	8.38464	41.4954	4.08171	1.49891	0.455018	6.07258	9.49333	19.6832	24.0381	16.8377	25.7307	3.00585	1.61531	17.1771	13.5524	15.4177	19.4226	10.456	14.3026
ENST00000501448.5|ENSG00000248015.7|OTTHUMG00000168079.4|OTTHUMT00000449737.1|ENST00000501448|ENSG00000248015|3571	3.571	0	0	2	1	0	0	3	0.840101	0.154757	0.228081	0.206523	0.205698	0.790222	1.85519	0.442939	1.14523	0.000638304	0.200883	0.142757	0.0916711	0.102743	0.113449	2.15538	0.962614	9.15956	8.04141	9.40521	9.37508	15.4187	13.9901
ENST00000505700.1|ENSG00000250451.5|OTTHUMG00000160024.1|OTTHUMT00000358934.1|HOXC-AS1-201|HOXC-AS1|548	0.548	1	0	1	1	0	0	3	5.47445	0.477536	0.438101	0	0	0	0	0.46756	0.564053	0.774807	1.47348	1.18584	1.69418	1.15679	0	0	0.286809	0	0	0	0	0	0.33544
ENST00000506633.1|ENSG00000251015.1|OTTHUMG00000163473.1|OTTHUMT00000373637.1|SLC25A30-AS1-201|SLC25A30-AS1|701	0.701	1	0	1	1	0	0	3	4.2796	0.0680795	0	0	0	0	0	0	0	0	0	0	0	0	0	0.0923911	0	0	0	0.455534	0.0807824	0	0.0314393
ENST00000506902.1|ENSG00000251279.3|OTTHUMG00000162242.2|OTTHUMT00000368079.1|SMIM15-AS1-201|SMIM15-AS1|796	0.796	1	0	1	1	0	0	3	3.76884	0.109183	0	0	0	0	0	0.183516	0.0102021	0	0	0	0	0	0	0	0.0684269	0	0	0	0	0	0
ENST00000507031.2|ENSG00000251417.2|OTTHUMG00000175740.2|OTTHUMT00000431010.2|ENST00000507031|ENSG00000251417|1963	1.963	0	0	0	1	0	2	3	1.52827	0.0732011	0.0556651	0.104166	0.0344287	0.0744823	0.330681	0.145798	0.0496746	0	0.103201	0	0.270478	0.0952555	0	0.10924	0.0967201	0	0	0.0577523	0.236659	0	0.154738
ENST00000507035.2|ENSG00000249082.2|OTTHUMG00000163077.2|OTTHUMT00000371600.2|EPIST-201|EPIST|843	0.843	0	0	1	2	0	0	3	3.55872	0	0	0	0	0	0	0	0	0	0	0	0	0	0	0	0	0	0	0	0	0	0
ENST00000507934.1|ENSG00000249690.1|OTTHUMG00000161447.1|OTTHUMT00000364976.1|ENST00000507934|ENSG00000249690|2209	2.209	0	0	2	1	0	0	3	1.35808	0	0	0	0	0	0	0	0	0	0	0	0	0	0	0	0	0	0	0	0	0	0
ENST00000509655.2|ENSG00000251405.3|OTTHUMG00000163480.3|OTTHUMT00000373684.1|NIPAL4-DT-201|NIPAL4-DT|1992	1.992	0	0	0	0	0	3	3	1.50602	0	0	0	0	0	0	0	0	0	0	0	0	0	0	0	0	0	0.135703	0	0	0.0400435	0
ENST00000509999.2|ENSG00000251409.2|OTTHUMG00000162741.1|OTTHUMT00000370276.1|ENST00000509999|ENSG00000251409|872	0.872	0	0	0	1	0	2	3	3.44037	0	0	0	0	0	0	0	0	0	0	0.126211	0	0	0	0	0	0	0	0	0	0	0
ENST00000511928.1|ENSG00000250986.1|OTTHUMG00000159831.5|OTTHUMT00000357609.4|LINC02600-201|LINC02600|4525	4.525	0	0	0	1	2	0	3	0.662983	0	0	0.010839	0	0	0.0587507	0	0	0	0	0	0	0	0	5.59e-10	3.89e-06	0	0.391679	0	0	0.163868	0.101363
ENST00000512206.1|ENSG00000273046.1|OTTHUMG00000186499.2|OTTHUMT00000473247.1|ENST00000512206|ENSG00000273046|1389	1.389	1	0	0	2	0	0	3	2.15983	0.21135	0	0.05081	0	0	0.52451	0.422998	0.259109	0	0	0.0319945	0.0568909	0.00109327	0.119761	0	0	0	0	0.0411354	0	0	0
ENST00000512241.1|ENSG00000248339.1|OTTHUMG00000161813.2|OTTHUMT00000366141.2|LINC02504-201|LINC02504|4949	4.949	0	0	0	0	0	3	3	0.606183	0	0	0	0	0	0	0	0	0	0	0	0	0	0	0	0	0	0	0	0	0	0
ENST00000514902.2|ENSG00000251533.2|OTTHUMG00000171894.1|OTTHUMT00000415685.1|LINC00605-201|LINC00605|1558	1.558	0	1	0	1	0	1	3	1.92555	0	0	0	0	0.0913265	0.0938821	0	0	0	0	0	0	0	0	0	0	0	0.0988958	0	0	0	0.0443339
ENST00000517604.1|ENSG00000253302.1|OTTHUMG00000164568.1|OTTHUMT00000379275.1|STAU2-AS1-201|STAU2-AS1|2076	2.076	0	0	1	1	0	1	3	1.44509	0	0	0	0	0	0	0	0	0	0	0	0	0	0	0	0	0	0	0	0	0	0
ENST00000517664.1|ENSG00000253636.1|OTTHUMG00000164580.1|OTTHUMT00000379313.1|ENST00000517664|ENSG00000253636|3549	3.549	0	0	0	0	1	2	3	0.845309	0	0	1.41592	3.62612	3.66763	1.19721	0.228289	0.0564952	0.960289	2.03124	0	1.17231	0.369666	1.0265	0	0	1.42758	0.574736	0.208849	0.756766	0	0
ENST00000518418.1|ENSG00000253298.2|OTTHUMG00000163542.3|OTTHUMT00000374080.1|LINC01845-201|LINC01845|2012	2.012	0	0	1	1	1	0	3	1.49105	0	0	0	0	0	0	0	0	0	0	0	0	0	0	0	0	0	0	0	0	0	0
ENST00000518570.2|ENSG00000253194.2|OTTHUMG00000164916.3|OTTHUMT00000380900.2|ENST00000518570|ENSG00000253194|1812	1.812	1	0	0	0	0	2	3	1.65563	0.0764894	0.069424	0.0185676	0	0.618466	0.0773042	0	0	0	0	0.0093808	0	0.0686548	0	0.0378294	0.088502	0	0	0	0	0	0
ENST00000525716.2|ENSG00000255455.2|OTTHUMG00000165662.2|OTTHUMT00000448585.1|ENST00000525716|ENSG00000255455|3994	3.994	0	0	0	0	1	2	3	0.751127	0	0	0	0	0	0	0	0	0	0	0	0	0	0	0	0	0	0	0	0	0	0
ENST00000527857.5|ENSG00000291172.1|-|OTTHUMT00000052810.2|SPATA31D5P-202|SPATA31D5P|4863	4.863	0	0	1	1	1	0	3	0.616903	0	0	0	0	0	0	0	0	0	0	0	0	0	0	0	0	0	0	0	0	0	0
ENST00000529785.1|ENSG00000290966.1|-|OTTHUMT00000384777.1|KRT87P-202|KRT87P|1700	1.7	1	0	1	1	0	0	3	1.76471	0	0	0	0	0	0	0	0	0	0	0	0	0	0	0	0	0	0	0	0	0	0
ENST00000530842.2|ENSG00000255236.3|OTTHUMG00000167388.3|OTTHUMT00000394458.2|CHKA-DT-202|CHKA-DT|1848	1.848	0	0	1	0	1	1	3	1.62338	0.0735015	0.0770219	0.0199976	0.178321	0.193987	0	0.0263104	0.0385002	0.332766	0.366435	0	0.0112731	0	0.0280886	0.142595	0.0942312	0	0	0	0.118797	0	0.122269
ENST00000534336.2|ENSG00000251562.10|OTTHUMG00000166322.5|OTTHUMT00000389143.1|MALAT1-202|MALAT1|8762	8.762	0	1	0	1	0	1	3	0.342388	NA	NA	NA	NA	NA	NA	NA	NA	NA	NA	NA	NA	NA	NA	NA	NA	NA	NA	NA	NA	NA	NA
ENST00000539086.5|ENSG00000257069.6|OTTHUMG00000167818.4|OTTHUMT00000396431.2|KCNK4-TEX40-201|KCNK4-TEX40|2733	2.733	1	0	0	2	0	0	3	1.09769	0	0	0	0	0	0	0.0154463	0	0	0	0	0	0	0	0	0	0	0	0	0	0	0
ENST00000544578.1|ENSG00000290383.1|-|OTTHUMT00000400310.1|ENST00000544578|ENSG00000290383|727	0.727	1	0	1	1	0	0	3	4.12655	0	0	0	0	0	0	0	0	0	0	0	0	0	0	0	0	0	0	0	0	0	0
ENST00000546324.1|ENSG00000257038.1|OTTHUMG00000167970.2|OTTHUMT00000397364.2|ARHGEF17-AS1-201|ARHGEF17-AS1|1695	1.695	1	0	1	1	0	0	3	1.76991	0	0	0.0156099	0	0	0	0	0	0	0	0	0	0	0	0	0	0	0	0.247405	0.184998	0.352635	0.118908
ENST00000548687.5|ENSG00000258168.6|OTTHUMG00000169498.4|OTTHUMT00000404428.2|ENST00000548687|ENSG00000258168|5903	5.903	0	1	0	0	0	2	3	0.508216	0.569292	0.503309	0	0	0.0646542	0	0.0180187	0.0429319	0	0.0541426	0	0.0290411	0.0113026	0	0.87674	1.51749	0	0.240204	1.03088	1.04691	1.80987	1.97967
ENST00000548801.1|ENSG00000257178.5|OTTHUMG00000170223.1|OTTHUMT00000408085.1|ENST00000548801|ENSG00000257178|2630	2.63	2	0	0	0	0	1	3	1.14068	0.886512	0.802536	3.76667	1.33861	19.5164	22.5384	0.0249167	0.00368214	0	1.04388	0	0	0	0	0	0	0	0	0	0	0	0.0187148
ENST00000553596.2|ENSG00000258655.2|OTTHUMG00000170588.2|OTTHUMT00000409732.2|ARHGAP5-AS1-201|ARHGAP5-AS1|1848	1.848	0	0	1	1	0	1	3	1.62338	0.489202	0.401346	0.113356	0.226792	0.804751	0.425108	0.486692	1.13101	3.90727	3.55758	0.447327	0.691264	0.731579	0.994904	1.36544	1.72203	10.9631	7.1022	2.52363	2.39713	1.19081	2.66169
ENST00000554749.1|ENSG00000258634.3|OTTHUMG00000170608.1|OTTHUMT00000409809.1|ENST00000554749|ENSG00000258634|4216	4.216	0	0	0	1	0	2	3	0.711575	1.56331	1.38732	0	0	0	0	3.27818	3.38451	0	0	0.324974	0	3.40662	0	1.05831	1.20087	0	0	0.462427	1.67979	1.02517	2.58455
ENST00000555107.1|ENSG00000258661.1|OTTHUMG00000170732.1|OTTHUMT00000410133.1|ENST00000555107|ENSG00000258661|2613	2.613	0	0	2	1	0	0	3	1.14811	0	0	0	0	0	0	0	0	0	0.0410388	0	0	0	0	0	0	0	0	0	0	0	0
ENST00000555918.1|ENSG00000258938.1|OTTHUMG00000170615.1|OTTHUMT00000409824.1|ENST00000555918|ENSG00000258938|2867	2.867	1	0	1	1	0	0	3	1.04639	0.011626	0.0102872	0.0980664	0.113003	0	0.0757169	0.0102448	0.072893	0.238866	0.033584	0.0109956	0.0850639	0	0	0.0795023	0	1.09371	0.118879	5.56e-09	0	0.035881	0.0360601
ENST00000555968.1|ENSG00000258727.1|OTTHUMG00000171522.1|OTTHUMT00000413878.1|AP1G2-AS1-201|AP1G2-AS1|3243	3.243	1	0	1	1	0	0	3	0.925069	0.177279	0.0555986	0.0785368	0	1.4e-07	0.470757	0.0903808	0.111137	0.0885338	0	0.129732	0.077875	0	0.118865	0.0264542	0	0	0.243741	0.22426	0.152662	0.400868	0.343803
ENST00000557359.6|ENSG00000258548.6|OTTHUMG00000170580.5|OTTHUMT00000409672.3|LINC00645-202|LINC00645|3495	3.495	0	0	0	0	0	3	3	0.858369	NA	NA	NA	NA	NA	NA	NA	NA	NA	NA	NA	NA	NA	NA	NA	NA	NA	NA	NA	NA	NA	NA
ENST00000557527.1|ENSG00000258804.1|OTTHUMG00000171357.1|OTTHUMT00000413105.1|LINC01148-201|LINC01148|1763	1.763	0	0	0	0	0	3	3	1.70164	0.0177102	0	0	0	0	0	0	0	0	0	0	0	0	0	0	0	0	0	0.00168879	0	0	0
ENST00000559786.1|ENSG00000259436.1|OTTHUMG00000171961.1|OTTHUMT00000416146.1|ENST00000559786|ENSG00000259436|1955	1.955	0	0	1	2	0	0	3	1.53453	0	0	0	0	0	0	0	0	0	0	0	0	0	0	0	0	0	0	0	0	0	0
ENST00000560376.1|ENSG00000259584.1|OTTHUMG00000172393.1|OTTHUMT00000418272.1|ENST00000560376|ENSG00000259584|864	0.864	1	0	0	1	0	1	3	3.47222	0.056326	0	0.0816665	0.154206	0.207044	0.582198	0	0	0.164635	0	0	0	0	0	0	0	0	0.0656695	0.687742	1.23056	1.57995	1.19265
ENST00000560400.1|ENSG00000259623.1|OTTHUMG00000172022.1|OTTHUMT00000416526.1|ENST00000560400|ENSG00000259623|2930	2.93	0	0	0	0	0	3	3	1.02389	0	0	0	1.19906	0	0	2.91e-10	0	1.38e-06	1.96398	3.76637	6.83827	7.51491	10.5753	0	0	6.00937	5.42178	14.2281	14.7735	0.944436	5.38648
ENST00000561145.1|ENSG00000259553.6|OTTHUMG00000172274.2|OTTHUMT00000417603.1|ENST00000561145|ENSG00000259553|712	0.712	1	0	1	1	0	0	3	4.21348	0.230093	0.0247944	0	0	0	0	0.120217	0.0340354	0	0	0	0.293339	0	0	0.0408509	0	0.088901	0	0	0	0	0
ENST00000561598.1|ENSG00000260759.1|OTTHUMG00000176127.1|OTTHUMT00000431547.1|ENST00000561598|ENSG00000260759|3710	3.71	0	0	0	1	0	2	3	0.808625	0	0	0	0	0	0	0	0	0	0	0	0	0	0	0	0	0	0	0	0	0	0
ENST00000562127.1|ENSG00000260763.1|OTTHUMG00000175410.1|OTTHUMT00000429897.1|ENST00000562127|ENSG00000260763|3300	3.3	0	0	0	0	0	3	3	0.909091	0	0	0	0	0	0	0	0	0	0	0.0223024	0	0	0	0	0	0	0	0	0	0	0
ENST00000562617.1|ENSG00000260217.1|OTTHUMG00000175847.2|OTTHUMT00000431173.2|ENST00000562617|ENSG00000260217|2109	2.109	0	0	0	0	0	3	3	1.42248	0	0	0	0	0	0	0	0	0	0	0	0	0	0	0	0	0	0	0	0	0.0372565	0
ENST00000563286.1|ENSG00000259959.1|OTTHUMG00000176325.1|OTTHUMT00000431763.1|ENST00000563286|ENSG00000259959|4218	4.218	0	1	0	0	0	2	3	0.711238	0.967018	0.807411	1.4173	2.91842	10.7689	1.69186	0.967197	0.305893	14.9	14.2805	11.6844	13.5235	11.2291	14.9227	1.61222	2.30525	17.6183	17.799	12.7843	15.2179	5.60192	9.16094
ENST00000564211.1|ENSG00000261136.1|OTTHUMG00000173059.1|OTTHUMT00000421969.1|ENST00000564211|ENSG00000261136|3047	3.047	1	0	0	0	0	2	3	0.984575	0.104399	0.224373	1.46371	2.76325	6.49298	2.30011	1.30357	0.692689	15.8252	12.6906	1.7595	2.16413	0.402861	0.598106	0.208957	0.0379259	14.4106	9.28698	0.49505	0.271279	0.119566	0.136135
ENST00000564585.1|ENSG00000260792.1|OTTHUMG00000173007.1|OTTHUMT00000421673.1|LINC02280-201|LINC02280|3816	3.816	0	0	1	0	0	2	3	0.786164	0	0	0.0324065	0.0471545	0.40489	0	0	0	0.221616	0.0352945	0.0916293	0.266128	0.128759	0.105305	0.0368333	0.0149663	0	0.26624	0.0728779	0	0.121297	0
ENST00000564619.1|ENSG00000260254.1|OTTHUMG00000168212.2|OTTHUMT00000398854.2|ENST00000564619|ENSG00000260254|8400	8.4	0	0	0	1	0	2	3	0.357143	0	0	0	0	0	0	0	0	0	0	0	0	0	0	0	0	0	0	0	0.00747933	0	0
ENST00000564748.1|ENSG00000261758.1|OTTHUMG00000175808.1|OTTHUMT00000431115.1|STAG1-DT-201|STAG1-DT|3151	3.151	0	0	0	0	0	3	3	0.952079	0.0755908	0.0541533	0.777556	1.22344	3.74097	1.48642	0.101491	0.0676633	5.56902	5.47205	0.282146	0.627979	0.224486	0.418524	0.29131	0.0732078	10.3888	5.12893	0.385436	0.326277	0.138	0.430424
ENST00000564832.1|ENSG00000260838.3|OTTHUMG00000164521.2|OTTHUMT00000379092.2|ENST00000564832|ENSG00000260838|3296	3.296	0	1	0	0	0	2	3	0.910194	0	0	0	0.0110029	0	0	0	0	0	0	0	0	0	0	0	0	0	0	0	0	0	0
ENST00000565254.1|ENSG00000261668.1|OTTHUMG00000176114.1|OTTHUMT00000431523.1|ENST00000565254|ENSG00000261668|3843	3.843	0	0	0	0	0	3	3	0.78064	0.18434	0.0880457	1.09331	2.83453	7.89173	2.3373	0.0789711	0.0327168	2.83098	3.78205	0.957814	2.24434	0.571603	0.961205	0.0727639	0.044569	3.50924	0.69338	0.994143	0.39973	0.0916969	0.0747945
ENST00000565297.2|ENSG00000261618.2|OTTHUMG00000173421.2|OTTHUMT00000423044.2|LINC02605-201|LINC02605|5219	5.219	1	0	0	0	0	2	3	0.574823	0	0	0	0.00487184	0	0	0	0	0	0	0	0	0	0	0.621953	0.212776	4.4924	2.74477	1.24456	1.26901	0.861759	0.773111
ENST00000565581.1|ENSG00000261529.1|OTTHUMG00000176881.1|OTTHUMT00000434205.1|ENST00000565581|ENSG00000261529|1603	1.603	0	0	0	0	0	3	3	1.87149	0	0	0	0	0	0.0370407	0	0	0.00102055	0	3.32399	7.86721	0.826657	5.13363	0	0	0	0	0.263439	0	0	0
ENST00000565617.1|ENSG00000261087.1|OTTHUMG00000173422.1|OTTHUMT00000423045.1|ZNNT1-201|ZNNT1|2825	2.825	0	0	0	0	1	2	3	1.06195	0.226093	0.218656	0.891585	1.71208	5.21657	1.42926	1.00663	0.300212	3.89811	4.51564	13.2859	14.2121	15.7959	17.7478	0.0670828	0.26711	2.2261	2.58237	5.07456	8.78479	6.66262	9.67817
ENST00000565882.1|ENSG00000261334.1|OTTHUMG00000175667.1|OTTHUMT00000430763.1|ENST00000565882|ENSG00000261334|1934	1.934	0	0	1	2	0	0	3	1.55119	0.148174	0.163742	0.808246	1.17602	2.52479	3.92924	0.121426	0.133054	3.13607	2.65691	0.0844357	0.118627	0.109126	0.0939017	0.0504472	0	0.730145	0.893426	0.0820447	0.156049	0.0831712	0.0335068
ENST00000566527.1|ENSG00000261757.1|OTTHUMG00000173470.1|OTTHUMT00000423225.1|ENST00000566527|ENSG00000261757|1640	1.64	0	0	0	0	0	3	3	1.82927	0	0	0.032404	0.0471538	0.184025	0.0885104	0.00738167	0	0	0.192868	0	0.0734036	0	0.0581099	0	0	0	1.10746	0.203969	1.06182	0	0.165662
ENST00000566738.1|ENSG00000261513.1|OTTHUMG00000176869.1|OTTHUMT00000434145.1|ENST00000566738|ENSG00000261513|777	0.777	0	0	1	2	0	0	3	3.861	0	0	0	0	0.227039	0	0	0	0	0	0	0	0	0	0.0365033	0	0	0	0	0	0	0
ENST00000566954.1|ENSG00000260996.1|OTTHUMG00000175633.1|OTTHUMT00000430680.1|ENST00000566954|ENSG00000260996|1854	1.854	1	0	1	1	0	0	3	1.61812	0.0221584	0	0.0988287	0.102716	1.52352	1.61723	0.0574152	0.197378	0	0.329587	0.0445475	0.125165	0.0383476	0.099079	0.0132096	0	0.128441	0.314339	0	0	0	0
ENST00000567058.1|ENSG00000260834.2|OTTHUMG00000172810.2|OTTHUMT00000420598.2|ENST00000567058|ENSG00000260834|1337	1.337	0	0	2	1	0	0	3	2.24383	0	0	0	0	0	0	0	0	0	0	0	0	0	0	0	0	0	0	0	0	0	0
ENST00000567292.1|ENSG00000291229.1|-|OTTHUMT00000419799.1|ENST00000567292|ENSG00000291229|2276	2.276	0	0	0	2	0	1	3	1.3181	0	0	0.0225246	0.0492673	0.12794	0.0621742	0	0	0	0	0	0	0	0	0	0.0517927	0	0.121573	0.0668423	0	0	0.0548333
ENST00000568177.1|ENSG00000260285.1|OTTHUMG00000172764.2|OTTHUMT00000420383.1|TRMT61A-DT-201|TRMT61A-DT|4063	4.063	0	0	0	2	1	0	3	0.738371	0.393195	0.340184	1.25616	1.10404	4.27583	5.4603	1.55392	1.28053	2.45466	1.77795	0.51189	0.52116	0.675679	0.68739	0.30373	0.217598	3.50074	3.22692	0.135845	0.0653426	0.241212	0.210928
ENST00000568270.1|ENSG00000260151.1|OTTHUMG00000176148.1|OTTHUMT00000431569.1|LINC02673-201|LINC02673|1395	1.395	0	0	0	0	0	3	3	2.15054	0	0	0	0	0	0	0	0	0	0	0	0	0	0	0	0	0	0	0	0	0	0.051556
ENST00000570809.1|ENSG00000262228.3|OTTHUMG00000177498.1|OTTHUMT00000437193.1|ENST00000570809|ENSG00000262228|1755	1.755	0	0	0	0	0	3	3	1.7094	0	0	0.256942	1.03567	0.959925	0	0.0178327	0	0	0.869332	0.120459	0.689484	0	0	0	0	0	0.240651	0	0	0	0
ENST00000572453.1|ENSG00000267532.5|OTTHUMG00000180219.1|OTTHUMT00000450300.1|MIR497HG-202|MIR497HG|3838	3.838	1	1	1	0	0	0	3	0.781657	0	0	0.0178877	0.0432802	0.344405	0.171643	0	0	0.212789	0.125077	0	0	0	0	0	0	0	0	0	0	0	0
ENST00000572877.1|ENSG00000263120.1|OTTHUMG00000178130.1|OTTHUMT00000440637.1|ENST00000572877|ENSG00000263120|2356	2.356	0	0	1	0	0	2	3	1.27334	0	0	0.052264	0.059483	0	0	0	0	0.445655	0.109339	0	0	0	0.16656	0	0	0.455526	0.483816	0	0.0216297	0	4.84e-06
ENST00000573063.1|ENSG00000262691.1|OTTHUMG00000177484.1|OTTHUMT00000437139.1|ENST00000573063|ENSG00000262691|2677	2.677	0	1	0	1	0	1	3	1.12066	0.0164263	0.0249829	0.0733211	0.74231	4.25683	0	0	0	2.14646	1.52236	0.822787	1.25887	1.03296	1.27436	0	0	0.469503	0.313702	0.0879964	0	0.135797	0.00313832
ENST00000577087.2|ENSG00000262681.2|OTTHUMG00000178220.2|OTTHUMT00000441032.2|ENST00000577087|ENSG00000262681|3370	3.37	0	0	1	1	1	0	3	0.890208	0	0	0	0	0.0419687	0	0	0	0	0.0405659	0.0435519	0	0	0.024227	0	0	0.0626204	0	0.167869	0.0402954	0	0.0346735
ENST00000577781.1|ENSG00000263826.1|OTTHUMG00000178374.1|OTTHUMT00000441755.1|ENST00000577781|ENSG00000263826|2400	2.4	1	0	2	0	0	0	3	1.25	0.403051	0.230973	0.27639	0.572228	0.905734	0.578382	0.151621	0.158798	6.75356	8.11117	0.25888	0.363817	0.251907	0.323953	0.219577	0.0978325	4.84484	2.56471	0.187903	0.149605	0.0635176	0.33438
ENST00000578070.5|ENSG00000290928.1|-|OTTHUMT00000444256.1|ENST00000578070|ENSG00000290928|929	0.929	1	0	1	1	0	0	3	3.22928	2.68179	3.32922	0.11802	0.160456	2.8998	0.386406	0.123235	0.375992	0.180333	0.962504	0.136899	0	0.411159	0.58278	0.857874	0.425452	0	0	0.322519	0	0	0.313872
ENST00000578730.1|ENSG00000196810.5|OTTHUMG00000160166.3|OTTHUMT00000447762.1|CTBP1-DT-205|CTBP1-DT|2757	2.757	1	0	1	1	0	0	3	1.08814	0.859099	0.857006	0.108726	0.756385	0.542544	1.68157	0.50065	2.18753	2.65164	2.71117	1.01538	0.039399	1.0547	0.792965	2.39947	3.20907	7.37674	3.70642	3.21903	3.60371	2.95484	3.17067
ENST00000580528.2|ENSG00000232956.10|OTTHUMG00000179544.6|OTTHUMT00000447035.2|SNHG15-206|SNHG15|2998	2.998	0	0	1	1	0	1	3	1.00067	7.38564	6.21072	3.88444	4.38702	11.8324	9.58733	3.76797	4.16635	15.0342	15.0236	25.2845	16.7539	27.5297	22.0324	0	0	0	0.329828	0.236522	0.117954	0	0.162277
ENST00000580996.1|ENSG00000264739.1|OTTHUMG00000179142.1|OTTHUMT00000444955.1|ENST00000580996|ENSG00000264739|2166	2.166	0	0	1	2	0	0	3	1.38504	0.037476	0.0161063	0.142671	0.121144	0.202589	0.259378	0.015976	0.0137295	0.908718	0.679717	0.0733164	0.0515111	0.0633079	0	0.0225471	0.0273216	0.105598	0.1292	0	0.0338863	0	0
ENST00000582106.1|ENSG00000265688.2|OTTHUMG00000178435.1|OTTHUMT00000441951.1|MILIP-201|MILIP|1895	1.895	0	0	1	2	0	0	3	1.58311	2.10909	1.75949	0.091046	0.184685	0.497454	0.936176	1.1058	4.15969	0.477443	0.321966	0.297669	0.45957	0.259661	0.363816	1.70095	2.12245	1.76616	0.85804	0.696551	0.648307	0.116421	0.155945
ENST00000584805.1|ENSG00000266290.1|OTTHUMG00000179240.1|OTTHUMT00000445409.1|DYNLL2-DT-201|DYNLL2-DT|6113	6.113	0	0	0	0	1	2	3	0.490757	0	0.0327378	0	0	0	0	0.0103393	0.00444179	0	0	0	0	0	0	0	0.00918605	0.194956	0	0	0.0314208	0	0
ENST00000585065.1|ENSG00000264112.1|OTTHUMG00000178780.1|OTTHUMT00000443327.1|ENST00000585065|ENSG00000264112|4722	4.722	0	0	0	0	0	3	3	0.635324	0.12751	0.375236	0.0668221	0.157031	0.875269	0.354212	0.250581	0.0449237	0.130419	1.41795	3.09313	6.11215	9.41528	5.9783	0.805373	0.0493656	1.55464	1.56066	4.14174	6.30135	4.32681	9.3553
ENST00000586076.1|ENSG00000267801.1|OTTHUMG00000179917.1|OTTHUMT00000448941.1|ENST00000586076|ENSG00000267801|3175	3.175	0	0	1	2	0	0	3	0.944882	0	0.0107468	0.00787046	0.0114491	0	0.0641043	0	0.00894704	0.340803	0.0434	0	0.0327654	0.0202327	0.0259313	0.57804	0.181559	5.095	3.60826	0.20227	0.280328	0.250789	0.519471
ENST00000586101.1|ENSG00000266896.1|OTTHUMG00000180499.1|OTTHUMT00000451632.1|ENST00000586101|ENSG00000266896|1630	1.63	1	0	0	0	0	2	3	1.84049	0	0	0	0	0	0	0.0312055	0	0	0	0	0	0	0	0	0	0	0	0	0	0	0
ENST00000587587.1|ENSG00000267551.3|OTTHUMG00000180671.1|OTTHUMT00000452515.1|GNA15-DT-201|GNA15-DT|2319	2.319	0	1	0	0	1	1	3	1.29366	0.0246817	0.00337746	0.840183	0.797373	4.17387	3.12864	0.0726166	0.0727798	0	0	0	0	0.0332388	0	0	0	0	0	0	0	0	0
ENST00000588717.1|ENSG00000267353.1|OTTHUMG00000180902.1|OTTHUMT00000453561.1|ENST00000588717|ENSG00000267353|2197	2.197	1	0	0	0	0	2	3	1.3655	0	0	0	0	0	0	0	0	0	0	0	0	0	0	0	0	0	0	0	0	0	0
ENST00000588946.2|ENSG00000267774.2|OTTHUMG00000180091.2|OTTHUMT00000449692.2|ENST00000588946|ENSG00000267774|1081	1.081	0	0	1	1	0	1	3	2.77521	0	0	0	0	0	0	0	0	0	0	0	0	0	0	0	0	0	0	0	0	0	0
ENST00000590024.1|ENSG00000267784.1|OTTHUMG00000180308.1|OTTHUMT00000450684.1|ENST00000590024|ENSG00000267784|3590	3.59	0	0	0	0	0	3	3	0.835655	0	0	0	0	0	0	0	0	0	0	0	0	0	0	0	0	0	0	0	0	0	0
ENST00000590513.3|ENSG00000266962.3|OTTHUMG00000180244.2|OTTHUMT00000450398.2|HSD17B1-AS1-201|HSD17B1-AS1|2411	2.411	0	0	1	2	0	0	3	1.2443	3.60985	4.25226	2.90888	2.75463	8.41167	18.6461	5.54333	19.6441	13.6214	8.78423	3.21826	2.98505	3.28491	2.61323	7.37937	6.52264	13.7133	13.3197	6.85152	6.3383	1.54755	2.22557
ENST00000590535.2|ENSG00000266968.2|OTTHUMG00000179043.2|OTTHUMT00000444541.2|ENST00000590535|ENSG00000266968|1785	1.785	0	0	1	0	0	2	3	1.68067	0.023001	0	0	0	0.0746543	0	0	0	0	0	0	0	0	0	0	0	0	0	0	0	0	0
ENST00000591143.6|ENSG00000267014.6|OTTHUMG00000181996.9|OTTHUMT00000458560.3|LINC01532-202|LINC01532|3336	3.336	0	0	1	2	0	0	3	0.899281	NA	NA	NA	NA	NA	NA	NA	NA	NA	NA	NA	NA	NA	NA	NA	NA	NA	NA	NA	NA	NA	NA
ENST00000591558.1|ENSG00000267642.1|OTTHUMG00000176156.1|OTTHUMT00000431577.1|ASXL3-DT-201|ASXL3-DT|2492	2.492	0	0	1	1	0	1	3	1.20385	0	0	0	0	0	0	0	0	0	0	0	0	0	0	0	0	0	0	0	0	0	0
ENST00000592918.5|ENSG00000283633.1|OTTHUMG00000141300.11|OTTHUMT00000459901.1|ENST00000592918|ENSG00000283633|1576	1.576	1	0	2	0	0	0	3	1.90355	0.183462	0.108423	6.3722	7.85358	28.0105	24.0683	32.3109	18.6905	22.1728	32.3765	19.8757	23.7437	50.256	20.9041	0	0	0	0	0	0	0	0
ENST00000592982.2|ENSG00000267296.2|OTTHUMG00000180429.2|OTTHUMT00000451326.2|CEBPA-DT-201|CEBPA-DT|2198	2.198	1	0	1	1	0	0	3	1.36488	0.018446	0.0158554	0.0233995	0.0170222	0.132908	0.127412	0.0104732	0.0337516	0.315044	0.200318	0	0.0505931	0.0310972	0.120136	3.51138	3.65718	13.1707	8.75504	2.72188	1.16491	0.67228	0.343228
ENST00000593393.1|ENSG00000232098.3|OTTHUMG00000183534.1|OTTHUMT00000467029.1|ZNF584-DT-202|ZNF584-DT|3059	3.059	0	0	0	2	1	0	3	0.980713	0	0	0	0	0	0	0.842108	0.984514	0	0	0	0	0	0	0	0	0	0	0	0	0	0
ENST00000593427.1|ENSG00000268205.1|OTTHUMG00000183241.1|OTTHUMT00000465778.1|ENST00000593427|ENSG00000268205|4258	4.258	0	0	0	0	0	3	3	0.704556	5.80762	4.41738	4.0253	7.44274	32.7109	6.84154	4.32254	1.068	12.4395	21.1057	27.584	35.7907	52.2561	53.0486	8.82055	20.8504	28.5608	32.8124	51.6344	75.6263	54.7146	90.9814
ENST00000593581.6|ENSG00000269386.6|OTTHUMG00000182274.1|OTTHUMT00000460329.1|RAB11B-AS1-201|RAB11B-AS1|1020	1.02	1	0	1	1	0	0	3	2.94118	3.58211	4.01138	0.0636041	0.0566101	1.95674	3.2855	3.40075	12.2405	0.355006	0.403489	0.630079	0.530327	0.747774	1.17689	2.91234	3.73192	2.14042	1.7219	2.51081	3.69257	2.88951	2.19594
ENST00000594299.1|ENSG00000269653.1|OTTHUMG00000182401.1|OTTHUMT00000461015.1|ENST00000594299|ENSG00000269653|1890	1.89	0	0	1	1	1	0	3	1.5873	0	0	0	0	0	0	0.0103225	0.0812847	0	0	0.0194118	0	0	0	0	0	0	0	0	0	0	0
ENST00000594922.5|ENSG00000268066.5|OTTHUMG00000182466.1|OTTHUMT00000461472.1|FMR1-AS1-201|FMR1-AS1|2005	2.005	0	0	0	0	1	2	3	1.49626	0	0.0349991	0.074371	4.77e-08	0.477343	0	0.0815043	0	0	0.187722	0	0	0	0	0	0	0	0	0.0343823	0	0	0
ENST00000598007.2|ENSG00000268628.2|OTTHUMG00000186707.1|OTTHUMT00000473647.1|ENST00000598007|ENSG00000268628|1648	1.648	1	0	1	0	1	0	3	1.82039	0	0	0	0	0	0	0	0	0	0	0	0	0	0.0577365	0.0150461	0	1.64827	0.916902	0.101314	0.143865	0.102668	0
ENST00000598846.1|ENSG00000268575.1|OTTHUMG00000183552.1|OTTHUMT00000467163.1|ENST00000598846|ENSG00000268575|5079	5.079	0	0	0	0	0	3	3	0.590667	0.182039	0.38056	0.443793	0.346043	4.78086	1.5157	0.586781	0.208222	0.443994	0.775087	0.256804	0.288268	0.5573	0.698522	0.148023	0.0324471	0.925139	0.697864	0.426845	0.408488	0.687555	1.28599
ENST00000601296.2|ENSG00000268858.2|OTTHUMG00000187033.1|OTTHUMT00000474290.1|ENST00000601296|ENSG00000268858|3082	3.082	0	0	0	2	1	0	3	0.973394	3.6878	3.29225	9.28522	8.33121	29.8109	74.6927	8.58081	20.1885	15.0552	11.4485	1.49532	1.79684	1.15108	1.04643	7.69213	5.75171	20.7429	11.1595	4.39664	2.94512	2.59577	1.99623
ENST00000602306.2|ENSG00000270175.2|OTTHUMG00000183931.1|OTTHUMT00000467540.1|ENST00000602306|ENSG00000270175|1425	1.425	1	0	1	1	0	0	3	2.10526	2.27793	2.08459	2.13052	2.1317	7.23732	10.4133	1.67413	7.08577	8.80929	9.19147	1.26541	0.888363	1.24358	0.844017	1.84201	1.73676	11.5176	7.83228	1.55034	1.22622	0.439708	0.550608
ENST00000602388.1|ENSG00000269935.1|OTTHUMG00000183883.1|OTTHUMT00000467269.1|ENST00000602388|ENSG00000269935|1665	1.665	1	0	1	1	0	0	3	1.8018	0	0	0	0	0	0	0	0	0.0744758	0	0	0	0	0	0	0	0	0	0	0	0	0
ENST00000602918.2|ENSG00000256092.4|OTTHUMG00000168679.2|OTTHUMT00000467685.1|SBNO1-AS1-202|SBNO1-AS1|1941	1.941	1	0	1	1	0	0	3	1.5456	1.08523	0.894683	0.0451708	0.486337	2.51169	2.1401	1.11367	0.801106	0	0	1.19034	0	0.378253	0.342988	0.398421	0.074167	0	0	0.194288	1.71716	0.805812	1.7731
ENST00000603175.2|ENSG00000257702.5|OTTHUMG00000170509.3|OTTHUMT00000469711.1|LBX2-AS1-202|LBX2-AS1|2540	2.54	0	0	0	3	0	0	3	1.1811	0.513989	0.445777	0.801867	1.02276	1.74631	2.95215	0.301056	0.307124	7.15244	6.29233	3.26578	2.66466	4.12961	2.84386	6.32057	8.05677	44.8263	33.1702	18.6492	16.3495	7.20583	6.5491
ENST00000604845.1|ENSG00000270696.1|OTTHUMG00000185090.2|OTTHUMT00000469546.1|ENST00000604845|ENSG00000270696|1747	1.747	0	0	0	0	0	3	3	1.71723	0	0	0.269384	0.652751	0	0.0582089	0.457151	1.16206	0	0	0	0	0	0	0	0	0	0	0	0	0	0
ENST00000605896.1|ENSG00000272374.1|OTTHUMG00000185743.1|OTTHUMT00000471124.1|ENST00000605896|ENSG00000272374|4261	4.261	0	0	0	1	0	2	3	0.70406	0.230028	0.158214	2.60846	4.32298	9.63883	5.72574	0.396334	0.227756	2.01035	2.18705	0.45212	1.15364	0.145732	0.503058	0.283123	0.0800363	3.46505	2.14851	1.0628	1.37931	0.130716	0.146759
ENST00000605920.1|ENSG00000272447.1|OTTHUMG00000185658.1|OTTHUMT00000470940.1|ENST00000605920|ENSG00000272447|1701	1.701	1	0	0	2	0	0	3	1.76367	2.17407	3.15846	1.11931	0.96915	3.08136	5.48514	2.22697	8.59334	1.5099	1.13699	1.50161	1.03962	1.56715	0.664586	2.5748	2.77629	2.2878	2.34761	2.46237	1.88767	2.82431	3.97401
ENST00000605955.1|ENSG00000272502.1|OTTHUMG00000185517.1|OTTHUMT00000470636.1|ENST00000605955|ENSG00000272502|1141	1.141	0	0	1	1	0	1	3	2.62927	0	0	0	0	0	0	0	0	0	0	0	0	0	0	3.61377	1.57033	78.9973	62.3651	24.476	19.7104	57.7949	48.9887
ENST00000606050.1|ENSG00000290964.1|-|OTTHUMT00000493523.1|ENST00000606050|ENSG00000290964|1525	1.525	1	0	0	1	0	1	3	1.96721	0	0	0	0	0	0.0348915	0	0	0	0	0.149409	0	0	0.064066	0	0	0.0721546	0	0.122705	0	0	0
ENST00000606054.2|ENSG00000272523.2|OTTHUMG00000185544.1|OTTHUMT00000470689.1|LINC01023-201|LINC01023|2616	2.616	0	0	0	0	1	2	3	1.14679	1.62455	1.38332	1.19112	1.69057	5.72083	2.63262	2.82539	1.65189	12.5796	13.947	1.34318	2.33925	2.09887	2.72845	0.145612	0.133804	4.53818	1.02812	0.225779	0.108016	0.772838	0.510856
ENST00000606217.1|ENSG00000272121.1|OTTHUMG00000185495.1|OTTHUMT00000470604.1|ENST00000606217|ENSG00000272121|1069	1.069	0	0	2	1	0	0	3	2.80636	0	0	0	0	0	0	0	0	0	0	0	0	0	0	0	0	0	0	0	0	0	0
ENST00000606270.1|ENSG00000271714.1|OTTHUMG00000185527.1|OTTHUMT00000470654.1|FAM169A-AS1-201|FAM169A-AS1|1962	1.962	1	0	0	2	0	0	3	1.52905	0	0	0	0	0	0	0	0	0	0	0.041459	0	0	0	0.223473	0.121709	7.88654	3.58222	1.20817	0.498067	2.53125	1.02016
ENST00000606511.1|ENSG00000271933.1|OTTHUMG00000185666.1|OTTHUMT00000470945.1|ENST00000606511|ENSG00000271933|2163	2.163	0	1	1	1	0	0	3	1.38696	0.0938293	0.080651	0.0714438	0.0866213	0.202897	0.0324229	0	0.0687568	1.07089	1.36173	0.110162	0.103198	0.158536	0.245051	0.0223308	0	0.634672	0.517688	0.178004	0.0678879	0.0360969	0.087505
ENST00000606756.1|ENSG00000272472.1|OTTHUMG00000185409.1|OTTHUMT00000470462.1|ENST00000606756|ENSG00000272472|1384	1.384	0	1	0	0	0	2	3	2.16763	0	0	0	0	0	0	0.227847	0.0148164	0	0	0	0	2.75e-05	0	0.0209352	0	0	0.0808261	0	0.150202	0	0.0239505
ENST00000606967.2|ENSG00000272205.2|OTTHUMG00000185307.1|OTTHUMT00000470131.1|POU2F1-DT-201|POU2F1-DT|767	0.767	1	0	0	1	0	1	3	3.91134	0.304297	0.574835	1.38407	2.43128	5.08127	3.96307	1.62348	2.14676	22.9639	6.00544	1.42439	4.23511	2.33023	2.76444	0.111333	0	8.86267	3.19672	0.183137	0.163174	0.184657	0.138411
ENST00000606994.2|ENSG00000272086.2|OTTHUMG00000185453.1|OTTHUMT00000470550.1|GOLPH3-DT-201|GOLPH3-DT|1314	1.314	1	0	1	1	0	0	3	2.28311	3.85465	3.56265	2.1737	2.70744	4.98452	4.69749	4.38623	4.69212	23.0271	22.0092	2.83962	3.1889	3.75004	5.44443	3.41871	2.90493	20.7362	11.1847	5.09562	4.51847	1.55506	3.02924
ENST00000607056.1|ENSG00000272335.1|OTTHUMG00000185479.1|OTTHUMT00000470586.1|ENST00000607056|ENSG00000272335|2517	2.517	0	1	0	0	0	2	3	1.1919	2.87379	2.67664	2.39273	4.65601	18.3512	2.25126	2.48778	0.301238	37.6665	40.4893	41.2361	52.8419	50.9058	69.7054	2.80498	7.05017	14.1667	19.8613	13.9529	17.1298	14.3905	17.4258
ENST00000607222.1|ENSG00000272106.1|OTTHUMG00000185588.1|OTTHUMT00000470789.1|ENST00000607222|ENSG00000272106|2038	2.038	0	0	1	1	0	1	3	1.47203	3.38082	2.64798	5.26306	5.549	9.67547	14.4779	19.2286	10.3171	9.04453	6.37113	4.38786	6.66506	8.55799	6.50672	4.18078	4.29109	8.20144	6.41129	10.3595	7.59924	12.8368	14.3123
ENST00000607622.2|ENSG00000272192.2|OTTHUMG00000185473.1|OTTHUMT00000470581.1|PDE7A-DT-201|PDE7A-DT|1208	1.208	0	0	1	1	0	1	3	2.48344	0.320592	0.21424	0.623083	0.201547	1.31026	1.26704	0.140528	0.0696952	3.83256	5.7323	0	0	0.0682142	0.35718	0.256812	0	3.48958	1.42421	0.158634	0.148159	0.08029	0.0634056
ENST00000607862.5|ENSG00000234377.8|OTTHUMG00000185746.4|OTTHUMT00000471155.1|OBI1-AS1-214|OBI1-AS1|6001	6.001	0	0	0	0	1	2	3	0.499917	0	0	0	0	0	0	0	0	0	0	0	0	0	0	0	0	0	0	0	0	0	0
ENST00000608012.2|ENSG00000273084.2|OTTHUMG00000186132.1|OTTHUMT00000472303.1|ENST00000608012|ENSG00000273084|2383	2.383	0	1	1	1	0	0	3	1.25892	0.236899	0.18909	0.299958	0.374054	1.0953	2.53562	0.0334349	0.00615696	3.61994	5.57461	0.359018	0.917349	0.338725	0.290431	2.98702	2.83426	71.9837	47.9427	9.44536	7.12189	5.79833	5.29205
ENST00000608450.1|ENSG00000272768.1|OTTHUMG00000186249.1|OTTHUMT00000472495.1|ENST00000608450|ENSG00000272768|1441	1.441	1	0	0	2	0	0	3	2.08189	0.555149	0.728138	1.446	2.5417	1.27967	1.7473	0.103734	0.211765	6.77738	7.7919	0.685235	0.78721	0.426035	0.831007	0.489701	0.12862	5.21932	1.65223	0.427224	0.574936	1.051	0.88722
ENST00000608502.2|ENSG00000207955.5|OTTHUMG00000185897.2|OTTHUMT00000471662.2|MIR219A2HG-201|MIR219A2HG|1504	1.504	0	0	1	2	0	0	3	1.99468	0	0	0	0	0	0	0	0	0	0	0	0	0	0	0	0	0	0	0	0	0	0
ENST00000608591.5|ENSG00000273492.6|OTTHUMG00000186038.2|OTTHUMT00000472109.1|APP-DT-201|APP-DT|1979	1.979	0	0	0	0	0	3	3	1.51592	NA	NA	NA	NA	NA	NA	NA	NA	NA	NA	NA	NA	NA	NA	NA	NA	NA	NA	NA	NA	NA	NA
ENST00000608799.1|ENSG00000272843.1|OTTHUMG00000186270.1|OTTHUMT00000472568.1|ENST00000608799|ENSG00000272843|708	0.708	1	1	1	0	0	0	3	4.23729	0.268934	0.634941	1.58702	1.45343	1.54334	3.29061	1.44866	1.1146	41.0071	30.6307	2.9769	2.67459	2.7475	2.59191	0.082305	0.20197	8.75181	4.21851	0.222028	0.38893	1.11772	1.31553
ENST00000608941.1|ENSG00000272729.1|OTTHUMG00000186066.1|OTTHUMT00000472162.1|ENST00000608941|ENSG00000272729|1553	1.553	1	0	1	1	0	0	3	1.93175	0	0	0	0	0	0	0	0	0	0	0	0	0	0	0	0	0	0	0	0	0	0
ENST00000609144.1|ENSG00000273180.1|OTTHUMG00000186437.1|OTTHUMT00000473148.1|ENST00000609144|ENSG00000273180|554	0.554	1	0	1	0	0	1	3	5.41516	0	0	0	0	0	0	0	0	0	0	0	0	0	0	0	0	0	0.80025	0.497475	0	0.992091	0.322844
ENST00000609434.1|ENSG00000272791.1|OTTHUMG00000186447.1|OTTHUMT00000473164.1|ENST00000609434|ENSG00000272791|935	0.935	1	0	0	0	1	1	3	3.20856	2.10858	1.23487	1.41884	1.69888	6.80077	3.65841	5.96713	2.70303	6.10498	6.81334	3.28554	5.45802	2.7454	4.05356	0.493015	0.640192	2.12402	2.81903	1.22219	0.447614	0.494077	0.667971
ENST00000609485.2|ENSG00000272583.2|OTTHUMG00000186402.1|OTTHUMT00000473095.1|ENST00000609485|ENSG00000272583|1237	1.237	1	0	1	1	0	0	3	2.42522	0.0346756	0.0297937	0	0	0	0	0	0	0	0	0	0	0	0.17238	1.31175	1.27625	21.5485	11.4051	3.51742	2.28838	8.59273	4.59175
ENST00000609776.1|ENSG00000272944.1|OTTHUMG00000186317.1|OTTHUMT00000472862.1|ENST00000609776|ENSG00000272944|1949	1.949	0	0	1	2	0	0	3	1.53925	0	0	0	0	0	0	0	0	0	0	0	0	0	0	0	0	0	0	0	0	0	0
ENST00000609827.1|ENSG00000272604.1|OTTHUMG00000186297.1|OTTHUMT00000472786.1|ENST00000609827|ENSG00000272604|2578	2.578	1	0	0	0	0	2	3	1.16369	0.62261	0.521827	0.501739	1.51711	5.9236	1.36416	0.533321	0.259204	6.89801	8.50211	5.94202	5.5536	3.36991	4.9904	0.55842	0.906087	3.76264	2.30156	1.78994	1.6847	0.699109	1.34662
ENST00000609976.1|ENSG00000272582.1|OTTHUMG00000186180.1|OTTHUMT00000472369.1|ENST00000609976|ENSG00000272582|814	0.814	1	1	0	0	0	1	3	3.6855	0.0570687	0	0.0376424	0	0.640793	0.20893	0	0	0	0	0	0.220701	0.389765	0.174881	0	0	0	0	0.160742	0.289271	0	0.122911
ENST00000610046.2|ENSG00000272701.3|OTTHUMG00000186331.3|OTTHUMT00000472944.3|MESTIT1-201|MESTIT1|4118	4.118	0	0	2	1	0	0	3	0.728509	0	0	0	0	0.101935	0	0.00785528	0	0	0	0	0	0	0.0967448	0.0169357	0	0	0.0305675	0.0167274	0.032188	0.0169726	0.0554166
ENST00000610331.1|ENSG00000276334.1|OTTHUMG00000188157.1|OTTHUMT00000476391.1|ENST00000610331|ENSG00000276334|1621	1.621	1	0	0	0	0	2	3	1.85071	1.25556	0.692722	9.08534	19.1288	36.3432	7.24442	1.05577	0.48123	4.56928	5.68332	10.8952	19.7544	22.9188	28.422	0.655369	1.18768	5.06701	4.87053	12.3254	20.2754	4.31673	9.37656
ENST00000612093.1|ENSG00000290947.1|-|OTTHUMT00000409585.2|ENST00000612093|ENSG00000290947|3411	3.411	0	0	1	2	0	0	3	0.879507	0.0506166	0.057465	0.302081	0.233426	1.22333	2.73037	0.00990113	0.0582833	0.0709701	0.076822	0	0.0381279	0	0.0383204	0.0585729	0	0	0.014793	0.083822	0	0	0.041621
ENST00000612689.1|ENSG00000274425.1|OTTHUMG00000186597.1|OTTHUMT00000473447.1|ENST00000612689|ENSG00000274425|2813	2.813	0	0	2	1	0	0	3	1.06648	1.03619	1.26902	1.15541	1.04237	2.28951	5.30529	2.22508	4.17174	4.58338	2.69285	3.00289	2.03503	4.53205	2.1475	0.690716	0.990726	2.7001	1.13249	1.13911	0.719174	0.105038	0.170635
ENST00000613696.1|ENSG00000278727.1|OTTHUMG00000187228.1|OTTHUMT00000474607.1|ENST00000613696|ENSG00000278727|3585	3.585	0	0	0	0	0	3	3	0.83682	0	0	0	0	0	0	0	0	0	0	0	0	0	0	0	0	0	0	0	0	0	0
ENST00000613982.1|ENSG00000273523.1|OTTHUMG00000187319.1|OTTHUMT00000474756.1|ENST00000613982|ENSG00000273523|3433	3.433	0	0	1	1	0	1	3	0.873871	0	0.00990208	0.0144886	0	0.0411536	0.0196592	0	0	0	0.158911	0	0.0299761	0.0370474	0	0.00682469	0	0.122629	0.112501	0.0205434	0.0197292	0.0208416	0.0169773
ENST00000614046.1|ENSG00000290793.1|-|OTTHUMT00000473632.1|ENST00000614046|ENSG00000290793|2005	2.005	0	0	2	1	0	0	3	1.49626	0.467877	0.34293	0.129758	0.0106689	1.2409	0.703032	0.0301753	0.131639	0.591051	0	0	0	0.479638	0.35658	2.17417	1.90133	4.36422	3.24313	3.7383	4.2353	4.56257	6.22436
ENST00000614316.1|ENSG00000278239.1|OTTHUMG00000188263.1|OTTHUMT00000476791.1|ENST00000614316|ENSG00000278239|2265	2.265	0	0	0	0	0	3	3	1.3245	0	0.015356	0	0	0	0	0	0	0	0.0649361	0	0	0	0	0	0	0	0	0	0	0	0
ENST00000615131.2|ENSG00000275734.2|OTTHUMG00000187153.3|OTTHUMT00000474501.2|ENST00000615131|ENSG00000275734|3077	3.077	0	0	0	0	0	3	3	0.974976	0.0203571	0.0391644	1.00933	0.898463	4.03491	4.90242	0.416341	0.202445	0.232713	0.109217	0.0933301	0.149177	0.268802	0	0.0482497	0.0475887	0	0.180519	0.0145136	0	0.290946	0
ENST00000615671.2|ENSG00000285410.1|OTTHUMG00000192411.1|OTTHUMT00000493899.1|GABPB1-IT1-201|GABPB1-IT1|5926	5.926	1	0	0	0	0	2	3	0.506244	2.86314	2.57011	3.87786	6.29208	30.9861	9.23764	3.02261	2.48086	29.1674	32.8296	3.05289	7.51055	1.78543	4.3702	2.86961	2.70801	29.2103	19.2626	3.59718	3.34848	4.06347	3.70211
ENST00000615847.3|ENSG00000183250.13|OTTHUMG00000090294.4|-|LINC01547-203|LINC01547|3312	3.312	0	0	1	2	0	0	3	0.905797	0.581418	0.594732	0.648156	0.686198	0	3.56612	0.200734	0.630974	2.75395	2.91073	0.097689	0.382172	0.234598	0.366725	0.387679	0.222592	1.37944	0.316273	0.220428	0.220658	0.14799	0.20179
ENST00000616616.1|ENSG00000268181.3|OTTHUMG00000188126.1|OTTHUMT00000476230.1|ENST00000616616|ENSG00000268181|2281	2.281	1	0	0	0	1	1	3	1.31521	0	0	0	0	0	0	0	0	0	0	0	0	0	0	0	0	0	0	0	0	0	0
ENST00000617004.2|ENSG00000273796.2|OTTHUMG00000186524.1|OTTHUMT00000473289.1|ENST00000617004|ENSG00000273796|1135	1.135	0	0	1	2	0	0	3	2.64317	0.0764947	0	0.0994389	0.0361885	0.282278	0.615013	0.961898	1.67909	0	0.161266	0	0	0	0	0.299177	0	0.256118	0.313632	0.262599	0.16288	0.531478	0.487587
ENST00000617013.1|ENSG00000277152.1|OTTHUMG00000186940.1|OTTHUMT00000474056.1|ENST00000617013|ENSG00000277152|6721	6.721	0	0	1	0	1	1	3	0.446362	0.00575922	0	0.215834	0.282523	1.34889	0.691274	0.0015606	0.00603392	0.104921	0.40142	0.0613433	0.17253	0.0624455	0.136527	0.0170064	0	0.0880843	0.448858	0.303982	0.378644	0.0497612	0.122311
ENST00000617058.1|ENSG00000273599.1|OTTHUMG00000186571.1|OTTHUMT00000473380.1|ENST00000617058|ENSG00000273599|5428	5.428	0	0	1	2	0	0	3	0.55269	0	0	0	0	0	0	0	0	0.0188363	0	0	0	0	0	0.0296597	0.0103803	0.0738592	0.361331	0.074057	0.249912	0.0125259	0.450938
ENST00000617439.1|ENSG00000278576.1|OTTHUMG00000188630.1|OTTHUMT00000477766.1|ENST00000617439|ENSG00000278576|3178	3.178	0	0	0	0	0	3	3	0.94399	0	0	0.639896	1.55779	1.50417	0.771541	0.0833233	0.0363697	1.15608	0.449733	0.963076	1.37372	0.446006	0.324691	0	0.216386	1.57781	1.02853	0.845741	0.903407	1.23066	0.24785
ENST00000617440.1|ENSG00000275322.1|OTTHUMG00000187030.1|OTTHUMT00000474287.1|ENST00000617440|ENSG00000275322|1133	1.133	2	0	0	0	0	1	3	2.64784	0.199812	0.201016	0.467572	0.597471	0	0.819619	0.00316877	0	0.265371	0	0	1.4347	0	0	0.0808344	0.0999022	0	0.832858	0.797879	3.82e-06	0.474912	0.000193846
ENST00000617854.1|ENSG00000275139.1|OTTHUMG00000187467.1|OTTHUMT00000475041.1|ENST00000617854|ENSG00000275139|3955	3.955	1	0	0	0	1	1	3	0.758534	0	0	0	0	0	0	0	0	0	0	0	0	0	0	0	0	0	0	0	0	0	0
ENST00000617896.1|ENSG00000275329.1|OTTHUMG00000187245.1|OTTHUMT00000474633.1|ENST00000617896|ENSG00000275329|1843	1.843	0	0	1	1	0	1	3	1.62778	0.133812	0.0575039	0.127911	0.227479	0.565029	0.5427	0.141335	0.198766	0.130691	0.166036	0.224441	0	0.424992	0.149754	0.0930739	0.260704	0.517711	0.158378	0.349319	0.622096	0.619639	0.462952
ENST00000618749.1|ENSG00000276633.1|OTTHUMG00000186525.1|OTTHUMT00000473290.1|ENST00000618749|ENSG00000276633|2492	2.492	1	0	0	1	0	1	3	1.20385	0	0	0	0	0	0	0	0	0	0	0	0	0	0.0602828	0	0	0	0	0	0	0	0
ENST00000619017.1|ENSG00000273729.1|OTTHUMG00000187016.2|OTTHUMT00000474250.2|ENST00000619017|ENSG00000273729|3487	3.487	1	0	1	1	0	0	3	0.860338	0.147315	0.146256	0.413289	0.580456	1.41679	2.2045	0.209929	0.262504	2.08391	2.30315	0.293293	0.353415	0.145615	0.512773	0.121092	0.115285	2.83119	2.39471	0.302707	0.465217	0.511841	0.283575
ENST00000619442.1|ENSG00000275450.1|OTTHUMG00000188453.2|OTTHUMT00000478820.1|PTGER4P2-CDK2AP2P2-201|PTGER4P2-CDK2AP2P2|3123	3.123	0	0	1	2	0	0	3	0.960615	0	0	0	0	0	0.0217491	0.00353412	0.0385733	0	0	0	0	0.0412321	0	0	0	0	0.134272	0.0458169	0	0.0464778	0.0567183
ENST00000619492.1|ENSG00000275850.1|OTTHUMG00000187095.1|OTTHUMT00000474407.1|ENST00000619492|ENSG00000275850|2400	2.4	0	0	0	1	0	2	3	1.25	0	0	0	0	0	0	0	0	0.00209554	0	0	0	0	0	0	0	0	0	0	0	0	0
ENST00000620001.1|ENSG00000277619.1|OTTHUMG00000187902.1|OTTHUMT00000475677.1|ENST00000620001|ENSG00000277619|1374	1.374	0	0	1	2	0	0	3	2.18341	0	0.261137	0	0	0	0.560895	0.130765	0.276613	2.2881	2.04564	0	0	0	0	0.332181	0	2.62849	0.40482	0	0	0.0386205	0
ENST00000620266.1|ENSG00000278730.1|OTTHUMG00000186693.1|OTTHUMT00000473628.1|ENST00000620266|ENSG00000278730|2921	2.921	1	0	0	0	0	2	3	1.02705	2.78315	2.73291	0.83834	1.19897	5.94958	2.23751	1.31645	1.00851	1.40116	2.54787	2.54193	2.85958	3.32619	4.10357	10.5187	17.7023	11.1726	10.0208	22.098	21.7922	35.868	39.1673
ENST00000620594.2|ENSG00000177410.13|OTTHUMG00000032698.11|OTTHUMT00000474061.2|ZFAS1-209|ZFAS1|4526	4.526	0	0	0	0	0	3	3	0.662837	0.019823	0	0	0.00988902	0	0	0.03063	0.0175918	0	0	0	0	0.0335348	0	0	0	0	0	0	0	0.0176511	0.0145445
ENST00000620617.2|ENSG00000275964.2|OTTHUMG00000187050.1|OTTHUMT00000474335.1|ENST00000620617|ENSG00000275964|2492	2.492	0	0	1	2	0	0	3	1.20385	0.709964	0.943174	0.591922	0.460266	2.43474	1.1657	0.272477	0.43318	4.56112	6.26322	0.216538	0.956447	0.160628	0.860239	0.0766989	0.0234902	0.890497	0.708133	0.269278	0.0858147	0.0303432	0.122967
ENST00000622917.1|ENSG00000279700.1|OTTHUMG00000168017.1|OTTHUMT00000397540.1|ENST00000622917|ENSG00000279700|1355	1.355	0	0	1	1	1	0	3	2.21402	0	0	2.3759	2.17663	46.2498	41.2177	0	0	9.33064	4.75998	1.22279	1.64456	0.990984	1.28037	0	0	1.77746	1.02855	0.971615	0.93545	0	0.361897
ENST00000622968.1|ENSG00000279759.1|OTTHUMG00000182601.1|OTTHUMT00000462608.1|ENST00000622968|ENSG00000279759|4765	4.765	0	0	0	1	0	2	3	0.629591	0.186576	0.0121706	4.41137	7.80608	28.7198	21.6133	0.38133	0.179455	5.68227	8.64391	1.038	2.30894	2.61196	2.7707	0.0836969	0.0137173	4.78968	2.5902	1.40349	1.26908	0.811322	0.649985
ENST00000622993.1|ENSG00000279578.1|OTTHUMG00000187142.1|OTTHUMT00000474481.1|ENST00000622993|ENSG00000279578|3860	3.86	0	0	0	0	0	3	3	0.777202	0	0	0	0	0	0	0	0	0	0	0	0	0	0	0	0	0	0	0	0	0	0
ENST00000623012.1|ENSG00000279376.1|OTTHUMG00000175959.1|OTTHUMT00000431315.1|ENST00000623012|ENSG00000279376|4159	4.159	0	0	0	0	1	2	3	0.721327	0	0	0	0	0	0	0	0	0	0	0	0	0	0	0	0	0	0	0	0	0	0
ENST00000623057.2|ENSG00000279255.2|OTTHUMG00000186665.1|OTTHUMT00000473580.1|ENST00000623057|ENSG00000279255|2167	2.167	0	0	2	0	0	1	3	1.3844	0	0	0.0118832	0.0345784	0.0674956	0.19414	0.00532252	0	0	0	0	0	0.0316362	0	0	0	0	0	0.0355187	0	0	0
ENST00000623174.1|ENSG00000278899.1|OTTHUMG00000192185.1|OTTHUMT00000492461.1|ENST00000623174|ENSG00000278899|1268	1.268	1	0	1	1	0	0	3	2.36593	0.539497	0.347666	0.326891	0.761277	0.866176	0.597698	0.182787	0.196409	3.67853	1.37008	0.0747713	0.104949	0.0636126	0.166202	0.505888	0.347285	8.86985	4.10532	0.957267	0.413741	1.04377	1.00386
ENST00000623180.1|ENSG00000280279.1|OTTHUMG00000189255.1|OTTHUMT00000479188.1|LINC02887-201|LINC02887|2096	2.096	0	0	0	3	0	0	3	1.4313	0	0	1.0553	2.17313	5.75872	9.54472	0.386802	0.108767	0.145187	0.211003	0.136922	0.114066	0.089864	0.381684	0	0	0.421591	0.0683279	0	0.0705703	0.312776	0.209196
ENST00000623208.1|ENSG00000279786.1|OTTHUMG00000164255.1|OTTHUMT00000377957.1|ENST00000623208|ENSG00000279786|1816	1.816	0	0	0	0	1	2	3	1.65198	0	0	0	0	0	0	0.101797	0.00429366	0.492436	0	0	0	0.324869	1.61e-07	0	0.0498088	0	0	0.137848	0	0	0
ENST00000623257.1|ENSG00000279605.1|OTTHUMG00000165144.1|OTTHUMT00000382170.1|ENST00000623257|ENSG00000279605|4947	4.947	0	0	1	2	0	0	3	0.606428	0.0290445	0.0288496	0.00987743	0.00718339	0	0.0561785	0.0064606	0	0	0.0265466	0	0	0	0	0.00987428	0	0	0	0	0	0	0.0113314
ENST00000623268.1|ENSG00000280088.1|OTTHUMG00000170196.2|OTTHUMT00000407885.1|ENST00000623268|ENSG00000280088|1750	1.75	0	0	0	0	0	3	3	1.71429	0.66105	0.455518	0.322721	1.07627	0	0	3.56915	1.523	0	0	1.0711	0.8253	1.48524	0.291512	2.16637	4.58711	0	0	2.99793	3.05618	4.27272	3.51123
ENST00000623300.1|ENSG00000280135.1|OTTHUMG00000175936.1|OTTHUMT00000431290.1|ENST00000623300|ENSG00000280135|2920	2.92	0	0	0	0	0	3	3	1.0274	0	0	0	0	0	0	0	0	0	0	0	0	0	0	0	0	0	0	0.0247763	0	0	0
ENST00000623305.1|ENSG00000279756.1|OTTHUMG00000177102.1|OTTHUMT00000435299.1|ENST00000623305|ENSG00000279756|2251	2.251	0	0	2	1	0	0	3	1.33274	0	0	0	0	0.0647458	0	0	0	0	0	0	0	0	0	0.278047	0	3.52512	3.32711	1.45684	1.90746	1.75208	2.11172
ENST00000623308.1|ENSG00000279464.1|OTTHUMG00000176312.1|OTTHUMT00000431749.1|ENST00000623308|ENSG00000279464|2458	2.458	0	0	0	0	0	3	3	1.2205	0.589871	0.408146	2.01992	3.51803	6.35169	2.36662	0.677978	0.196188	22.584	19.5649	5.37728	5.65683	2.53044	2.62342	0.15601	0.119194	5.52229	4.70707	1.06475	1.51203	0.43192	0.974946
ENST00000623340.1|ENSG00000279426.1|OTTHUMG00000182193.1|OTTHUMT00000459952.1|ENST00000623340|ENSG00000279426|601	0.601	0	0	1	1	1	0	3	4.99168	0	0	0	0	0	0	0	0	0	0	0	0	0	0	0	0	0	0	0	0	0	0
ENST00000623346.1|ENSG00000279713.1|OTTHUMG00000179179.1|OTTHUMT00000445159.1|ENST00000623346|ENSG00000279713|1952	1.952	0	0	2	1	0	0	3	1.53689	0	0.0180125	0.0266663	0.0193999	0	0.0363431	0	0.00774253	0	0.0772475	0	0	0	0	0	0	0	0	0	0	0	0
ENST00000623381.1|ENSG00000279806.1|OTTHUMG00000176039.1|OTTHUMT00000431412.1|ENST00000623381|ENSG00000279806|1736	1.736	0	0	1	1	1	0	3	1.72811	0	0	0.0455879	0.066336	0.086302	0.165907	0	0	0.0705442	0.0895874	0	0.136239	0.125043	0	0	0.0348109	0.559541	2.56778	0.377944	1.38866	0	0.730586
ENST00000623440.1|ENSG00000279175.1|OTTHUMG00000189192.1|OTTHUMT00000479015.1|ENST00000623440|ENSG00000279175|13454	13.454	0	1	0	1	0	1	3	0.222982	0	0	0.0105415	0.00736899	0.0267223	0.044142	0	0	0.1692	0.217789	0	0.0444769	0.0082546	0	0	0	0	0	0	0	0	0.0103609
ENST00000623466.1|ENSG00000290893.1|-|OTTHUMT00000478873.1|ENST00000623466|ENSG00000290893|3066	3.066	0	0	2	0	0	1	3	0.978474	0	0	0	0	0	0	0	0	0	0	0	0	0	0	0	0	0	0	0	0	0	0
ENST00000623533.1|ENSG00000279042.1|OTTHUMG00000178814.1|OTTHUMT00000443408.1|ENST00000623533|ENSG00000279042|2529	2.529	0	0	0	1	2	0	3	1.18624	0	0	0	0	0	0	0	0	0.0887561	0	0.0303953	0	0	0	0	0	0	0	0	0.0281077	0.0298089	0.0483343
ENST00000623583.1|ENSG00000279631.1|OTTHUMG00000176140.1|OTTHUMT00000431561.1|ENST00000623583|ENSG00000279631|2518	2.518	1	0	1	1	0	0	3	1.19142	0	0	0	0	0	0	0	0	0	0.0567607	0	0	0	0	0	0	0	0	0	0	0	0
ENST00000623619.1|ENSG00000279092.1|OTTHUMG00000186808.1|OTTHUMT00000473817.1|ENST00000623619|ENSG00000279092|4824	4.824	0	0	0	1	1	1	3	0.621891	0	0	0	0	0.021308	0	0.391175	0.164696	1.65959	3.35248	1.86224	3.23542	1.20964	2.19165	0	0.000198003	3.00214	2.85757	0.962999	1.24795	0.82787	1.29682
ENST00000623634.1|ENSG00000280038.1|OTTHUMG00000172494.1|OTTHUMT00000418798.1|DNM1P41-201|DNM1P41|3350	3.35	0	0	0	3	0	0	3	0.895522	0.0118164	0.0353515	0.468243	0.658007	1.09329	2.1289	0.0589138	0.121884	2.37279	1.7561	0.526172	0.523942	0.133288	0.463438	0.0210156	0	0.18914	0.80976	0.190147	0.202843	0.0214336	0.122179
ENST00000623664.1|ENSG00000278996.1|OTTHUMG00000189417.1|OTTHUMT00000479651.1|ENST00000623664|ENSG00000278996|2498	2.498	1	0	0	0	0	2	3	1.20096	0	0	0	0	0	0.013854	0.00227321	0	0	0	0	0	0	0	0	0	0	0	0	0	0.0151765	0
ENST00000623801.1|ENSG00000279891.1|OTTHUMG00000187182.1|OTTHUMT00000474546.1|FLJ42393-201|FLJ42393|2270	2.27	0	0	0	0	0	3	3	1.32159	0	0	0	0	0.118583	0	0	0	0	0	0.025941	0.0284238	0	0	0.292056	0.0710194	0	0.22447	3.87206	7.43143	3.0748	2.15
ENST00000623895.1|ENSG00000280087.1|OTTHUMG00000180843.1|OTTHUMT00000453244.1|ENST00000623895|ENSG00000280087|5594	5.594	1	0	0	0	0	2	3	0.536289	0	0.0395211	0.0677772	0.0735462	0.12672	0.302962	0.0038921	0.0170646	0.184086	0.187359	0.413903	0.159064	0.175365	0.0277682	0.229795	0.0996476	1.50136	0.989606	0.372695	0.629722	0.584678	0.558883
ENST00000623921.1|ENSG00000279019.1|OTTHUMG00000175517.1|OTTHUMT00000430339.1|ENST00000623921|ENSG00000279019|3691	3.691	0	0	0	3	0	0	3	0.812788	0.0213601	0.0459093	0.0805257	0.214745	0.114365	0.364069	0.023568	0.0265797	0.258761	0.256399	0.353686	0.248619	0.392861	0.174894	0.0126503	0	0	0.172745	0.0945896	0.200006	0.0959684	0.10954
ENST00000623944.1|ENSG00000279827.1|OTTHUMG00000182427.1|OTTHUMT00000461132.1|ENST00000623944|ENSG00000279827|1028	1.028	0	0	2	1	0	0	3	2.91829	0.128643	0.110509	0.0280338	0.204072	0.954852	0.154479	0	0.0345721	0.744797	0.188054	0.103543	0	0	0	0.0776134	0.253785	0.300584	0	0	0.0953234	0	0
ENST00000623953.1|ENSG00000279725.1|OTTHUMG00000186887.1|OTTHUMT00000473962.1|ENST00000623953|ENSG00000279725|2435	2.435	1	0	1	1	0	0	3	1.23203	0	0	0	0	0	0	0	0	0	0	0	0	0	0	0	0	0	0	0	0	0	0
ENST00000624072.1|ENSG00000279080.1|OTTHUMG00000189202.1|OTTHUMT00000479032.1|ENST00000624072|ENSG00000279080|20397	20.397	0	0	1	1	0	1	3	0.14708	0	0.0033164	0.00118857	0.0068655	0	0.00997325	0.00509038	0.00515969	0.00481923	0	0	0	0	0	0.00322579	0	0	0.00605148	0.00316862	0.0119229	0.00500559	0
ENST00000624111.2|ENSG00000279685.2|OTTHUMG00000177993.2|OTTHUMT00000440179.2|MAPT-IT1-201|MAPT-IT1|3016	3.016	2	0	0	0	0	1	3	0.994695	0.0344044	0.0196639	0.0521491	0.0997481	1.44674	0.540384	0	0	0.271299	0.0332881	0.00509999	0.0061404	0	0.159596	0	0	0.156681	0.0564219	0.0454592	0	0.0781992	0
ENST00000624119.1|ENSG00000279034.1|OTTHUMG00000176176.1|OTTHUMT00000431599.1|ENST00000624119|ENSG00000279034|3569	3.569	0	0	0	0	0	3	3	0.840572	0	0	0	0	0	0	0	0	0	0	0	0	0	0	0	0	0	0	0	0	0	0
ENST00000624150.1|ENSG00000278879.1|OTTHUMG00000165536.1|OTTHUMT00000384729.1|ENST00000624150|ENSG00000278879|1937	1.937	0	0	0	0	0	3	3	1.54879	0	0	0	0	0	0	0.111696	0	0	0	0	0	1.34187	0.0973343	0.00175746	0.498826	0	0	0.678721	1.2897	0.986982	1.7676
ENST00000624215.1|ENSG00000280011.1|OTTHUMG00000189263.1|OTTHUMT00000479245.1|ENST00000624215|ENSG00000280011|19071	19.071	0	1	0	1	1	0	3	0.157307	0	0.00172085	0	0	0	0	0	0	0	0	0	0.0097325	0	0	0	0	0	0	0.00407456	0	0	0
ENST00000624251.1|ENSG00000279693.1|OTTHUMG00000177439.1|OTTHUMT00000436915.1|ENST00000624251|ENSG00000279693|2938	2.938	0	0	1	1	1	0	3	1.0211	0.032841	0.00218553	0.0367539	0	0.484293	0.298361	0	0.013672	0.000658823	0.0170995	0.0600026	0	0.058814	0	0	0	0	0	0	0	0.0476687	0
ENST00000624264.1|ENSG00000279217.1|OTTHUMG00000189182.1|OTTHUMT00000479004.1|ENST00000624264|ENSG00000279217|14574	14.574	0	0	0	0	0	3	3	0.205846	0.00268437	0.00491792	0.00817117	0.0215853	0.090249	0.0247896	0	0	0.0201283	0.0170843	0	0.0128209	0.00398575	0.0152172	0	0	0	0	0	0.00423267	0	0
ENST00000624300.1|ENSG00000279165.1|OTTHUMG00000176220.1|OTTHUMT00000431645.1|ENST00000624300|ENSG00000279165|1904	1.904	0	0	0	0	0	3	3	1.57563	0.0783568	0.0430406	0.0685327	0.0232961	0.475624	0.0454529	0.020777	0	0.0627108	0.0796866	0	0	0	0	0	0	0	0.1519	0	0.0397906	0.0848617	0
ENST00000624324.2|ENSG00000279198.2|OTTHUMG00000182135.1|OTTHUMT00000459676.1|ENST00000624324|ENSG00000279198|3104	3.104	1	0	1	1	0	0	3	0.966495	0.243173	0.286068	0.346675	0.504313	1.00757	1.44486	0.935723	0.403595	2.20325	1.73678	0.215294	0.67253	0.352916	0.372581	0.121441	0.111569	4.19725	1.05212	0.230712	0.265559	0.210635	0.152309
ENST00000624379.1|ENSG00000279511.1|OTTHUMG00000175981.1|OTTHUMT00000431343.1|ENST00000624379|ENSG00000279511|3752	3.752	0	0	0	0	0	3	3	0.799574	0.0419978	0.00902663	0.0197867	0.0575637	0.449627	0.196793	0	0	0.0564589	0	0	0.0271213	0	0	0.00621754	0.0914009	0.443673	0.339179	0.185705	0.160663	0.13189	0.0153643
ENST00000624417.1|ENSG00000279692.1|OTTHUMG00000176097.1|OTTHUMT00000431502.1|ENST00000624417|ENSG00000279692|1536	1.536	0	0	1	2	0	0	3	1.95312	0	0	0.0349076	0	0.0991174	0.0954361	0	0.0309108	0.331468	0.210277	0.0570649	0	0	0	3.66217	3.15191	16.4769	11.0916	16.5133	12.7496	12.322	8.45021
ENST00000624451.1|ENSG00000278922.1|OTTHUMG00000176945.1|OTTHUMT00000434394.1|ENST00000624451|ENSG00000278922|1377	1.377	0	0	1	2	0	0	3	2.17865	0.122944	0.184879	0.178125	0.144024	0.22477	1.13824	0.0365914	0.31846	0.577385	0.731825	0	0.466057	0	0.147602	0.14731	0	0.959546	0.234919	0.0651579	0.061261	0.329962	0.0525004
ENST00000624480.1|ENSG00000279192.1|OTTHUMG00000184194.1|OTTHUMT00000468274.1|PWAR5-201|PWAR5|3180	3.18	0	1	0	0	0	2	3	0.943396	0.0525886	0.00729944	0.0120714	0.0152306	0.0058095	0.033926	0	0	0.0287684	0.0622655	0.0168222	0.133012	0.15983	0.0473493	12.8209	21.4261	18.8618	17.2416	24.3233	29.0034	22.7048	16.217
ENST00000624508.1|ENSG00000280160.1|OTTHUMG00000176775.1|OTTHUMT00000433690.1|ENST00000624508|ENSG00000280160|2218	2.218	0	0	1	2	0	0	3	1.35257	0.0182717	0.0157044	0.0579219	0.101136	0.0658071	0.126145	0.00518261	0	0.20773	0.0660446	0.0356072	0.200143	0	0.0396042	0.0108671	0.0266288	1.33325	1.00383	0.103516	0.164594	0.0699757	0.141443
ENST00000624520.1|ENSG00000279773.1|OTTHUMG00000187360.1|OTTHUMT00000474815.1|ENST00000624520|ENSG00000279773|1839	1.839	0	0	2	1	0	0	3	1.63132	0	0	0	0	0	0	0	0	0	0	0	0	0	0	0	0	0	0	0	0	0	0
ENST00000624531.1|ENSG00000280296.1|OTTHUMG00000187322.1|OTTHUMT00000474760.1|ENST00000624531|ENSG00000280296|3099	3.099	0	0	1	0	0	2	3	0.968054	0	0	0	0	0	0	0	0	0	0	0	0	0	0	0	0.0186266	0.137871	0.042163	0.0231145	0.0665128	0.0468954	0
ENST00000624591.1|ENSG00000278895.1|OTTHUMG00000182102.1|OTTHUMT00000459471.1|ENST00000624591|ENSG00000278895|1969	1.969	0	0	0	0	1	2	3	1.52362	0	0	0	0.0192326	0	0	0	0	0	0	0	0	0	0	0	0	0	0	0	0	0	0
ENST00000624646.1|ENSG00000280422.1|OTTHUMG00000175712.1|OTTHUMT00000430891.1|ENST00000624646|ENSG00000280422|2054	2.054	1	0	0	0	0	2	3	1.46056	0	0	0.0252072	0.036676	0	0.103033	0	0.0218933	0	0	0	0.220016	0	0.26123	0	0	0.676795	0.621077	0.949766	1.12162	0.2311	1.05686
ENST00000624727.1|ENSG00000279733.1|OTTHUMG00000167289.1|OTTHUMT00000394018.1|ENST00000624727|ENSG00000279733|2117	2.117	1	0	0	0	0	2	3	1.4171	0.0711487	0.0476006	0.00311273	0.0112372	0	0	0	0	0	0.0933536	0	0.206958	0	0	0	0	0.0886522	0.00155843	0	0	0	0.0276899
ENST00000624769.1|ENSG00000279118.1|OTTHUMG00000173432.1|OTTHUMT00000423087.1|ENST00000624769|ENSG00000279118|2326	2.326	0	0	0	0	0	3	3	1.28977	0	0.0149284	0.0769907	0.17602	0.37484	0.299906	0.0392747	0.0696118	0.147102	0.436604	0.100818	0.188906	0.17432	0.11214	0.0930045	0.17085	1.3548	1.71674	0.585714	0.932122	0.098991	0.507432
ENST00000624861.1|ENSG00000279853.1|OTTHUMG00000173300.1|OTTHUMT00000422709.1|ENST00000624861|ENSG00000279853|2153	2.153	0	1	0	0	0	2	3	1.3934	0	0	0.0718078	0.0174126	0.0679768	0.0325895	0	0	0.0538484	0.0684711	0.147723	0	0	0.0821505	0.0112216	0	0	0.195248	0.0716148	0.273101	0.108919	0.0293342
ENST00000624866.1|ENSG00000280294.1|OTTHUMG00000163823.1|OTTHUMT00000375785.1|ENST00000624866|ENSG00000280294|3352	3.352	0	0	1	1	0	1	3	0.894988	0	0	0	0	0	0	0	0	0	0	0	0	0	0	0	0	0	0	0	0	0	0
ENST00000624914.4|ENSG00000174407.15|OTTHUMG00000048000.1|OTTHUMT00000109262.1|MIR1-1HG-202|MIR1-1HG|1229	1.229	0	0	1	1	0	1	3	2.44101	NA	NA	NA	NA	NA	NA	NA	NA	NA	NA	NA	NA	NA	NA	NA	NA	NA	NA	NA	NA	NA	NA
ENST00000624916.1|ENSG00000280399.1|OTTHUMG00000175812.1|OTTHUMT00000431117.1|ENST00000624916|ENSG00000280399|3691	3.691	0	0	0	1	0	2	3	0.812788	0	0	0	0	0.0381234	0	0	0	0	0	0.0196492	0	0	0	0.114742	0.0313394	0.225963	0.0690981	0.472948	0.472741	0.0383874	0.10954
ENST00000624920.1|ENSG00000280407.3|OTTHUMG00000178833.1|OTTHUMT00000443504.1|ENST00000624920|ENSG00000280407|2778	2.778	0	0	2	1	0	0	3	1.07991	0	0	0	0	0	0	0	0	0	0	0	0	0.00110063	0	0	0	0	0	0	0	0	0
ENST00000624923.1|ENSG00000279467.1|OTTHUMG00000189174.1|OTTHUMT00000478995.1|ENST00000624923|ENSG00000279467|8030	8.03	0	0	0	0	0	3	3	0.373599	0	0	0	0	0	0.00810769	0	0	0	0.0476222	0	0	0	0	0	0	0	0	0	0	0	0
ENST00000625075.1|ENSG00000279358.1|OTTHUMG00000186081.1|OTTHUMT00000472220.1|ENST00000625075|ENSG00000279358|2265	2.265	0	0	0	0	0	3	3	1.3245	0	0	0	0	0	0	0	0	0.0292407	0	0	0.0224361	0	0	0	0	0	0	0	0	0	0
ENST00000625094.1|ENSG00000279035.1|OTTHUMG00000179347.1|OTTHUMT00000445864.1|ENST00000625094|ENSG00000279035|2161	2.161	2	0	0	1	0	0	3	1.38825	0.207224	0.145316	0.166871	0.173418	0.812524	1.03859	0.0213579	0.0825959	0.75047	0.272778	0.183813	0	0.0952282	0.0817767	0.111766	0.0273901	0.741297	0.51828	0.0712838	0.13593	0.216832	0.175208
ENST00000625151.1|ENSG00000279770.1|OTTHUMG00000186842.1|OTTHUMT00000473881.1|LINC00552-201|LINC00552|2579	2.579	0	0	1	1	1	0	3	1.16324	0.0155589	0.040124	0	0.0429192	0.167579	0.187158	0	0.0168973	0	0	0	0	0	0	0	0	0	0	0	0	0	0
ENST00000625156.1|ENSG00000279135.1|OTTHUMG00000186834.1|OTTHUMT00000473871.1|ENST00000625156|ENSG00000279135|1716	1.716	0	0	1	0	0	2	3	1.74825	0	0	0.038399	0	0.284642	0.159936	0	0	0.0397008	0	0	0.150857	0.112222	0.0833622	0	0	0.546866	0.955242	0	0.0686273	0.0463357	2.61e-05
ENST00000626198.1|ENSG00000281912.1|OTTHUMG00000189536.1|OTTHUMT00000479926.1|LINC01144-201|LINC01144|1710	1.71	0	0	1	2	0	0	3	1.75439	0.822696	0.644667	0.494588	0.517281	1.14111	2.32068	0.589754	0.615489	3.16513	5.93735	0.593525	0.486319	0.467445	0.714969	0.577672	0.14159	7.84776	4.62733	0.289217	0.456847	0.146554	0.196059
ENST00000628401.1|ENSG00000281183.1|OTTHUMG00000189514.1|OTTHUMT00000479843.1|NPTN-IT1-201|NPTN-IT1|2283	2.283	0	1	0	0	0	2	3	1.31406	0.179693	0.231697	1.32147	1.1367	9.09265	5.46987	0.832757	0.134658	0	0	8.58918	4.64196	9.96899	13.1546	0.507376	0.0934373	0	1.58959	5.06089	8.08299	0.31566	2.10199
ENST00000628780.1|ENSG00000279141.4|OTTHUMG00000189535.1|OTTHUMT00000479925.1|LINC01451-202|LINC01451|3402	3.402	1	0	1	1	0	0	3	0.881834	0.0074615	0	0.00123537	0.031919	0.0511899	0	0.0284753	0	0	0	0	0	0	0	0	0	0	0	0	0	0	0
ENST00000629776.1|ENSG00000281832.1|OTTHUMG00000189549.1|OTTHUMT00000479952.1|LINC00602-201|LINC00602|2065	2.065	0	0	1	2	0	0	3	1.45278	0	0	0	0	0	0	0	0	0	0	0	0	0	0	0	0	0	0	0	0	0	0
ENST00000634905.2|ENSG00000291068.1|-|OTTHUMT00000488432.1|ENST00000634905|ENSG00000291068|2975	2.975	0	0	2	1	0	0	3	1.0084	1.32745	1.06904	1.44684	1.17538	13.8102	13.8399	3.75492	4.08573	6.37414	6.32075	4.03123	3.26725	4.91332	4.09451	0.587472	0.56273	3.22228	2.09704	2.80443	1.65265	1.94344	1.74492
ENST00000635019.1|ENSG00000283097.1|OTTHUMG00000191493.1|OTTHUMT00000488088.1|ENST00000635019|ENSG00000283097|2587	2.587	1	0	0	0	0	2	3	1.15964	0.182543	0.150248	0.716199	2.29277	8.23086	1.07925	0	0	1.35719	1.18373	0.263582	0.954221	0.82012	0.674177	0	0	0	0.0346575	0.0499079	0.206549	0.0546945	0
ENST00000636354.1|ENSG00000283213.1|OTTHUMG00000191620.1|OTTHUMT00000488864.1|ENST00000636354|ENSG00000283213|4683	4.683	0	0	0	0	0	3	3	0.640615	0	0	0	0.0152111	0	0	0	0	0	0	0	0	0	0	0	0	0	0	0	0	0	0
ENST00000636467.2|ENSG00000283503.4|OTTHUMG00000191634.2|OTTHUMT00000488947.2|LINC01902-201|LINC01902|7784	7.784	0	0	0	0	0	3	3	0.385406	0	0	0	0	0	0	0	0	0	0	0	0.0246142	0	0	0	0	0	0	0	0	0	0
ENST00000638446.1|ENSG00000284237.1|OTTHUMG00000191985.1|OTTHUMT00000491853.1|LINC02767-201|LINC02767|7440	7.44	0	0	1	1	0	1	3	0.403226	0.0415328	0	0	0	0.0368222	0	0.00102427	0.0162844	0	0	0.00917908	0.0258173	0	0	0.00674392	0	0	0	0	0	0	0
ENST00000641088.1|ENSG00000290821.1|-|OTTHUMT00000493648.1|ENST00000641088|ENSG00000290821|5937	5.937	0	0	0	0	0	3	3	0.505306	0	0	2.22e-05	3.72e-05	0	0	0	0	0	0	0	0	0	0	0	0	0	0	0	0.0328691	0.0227371	0
ENST00000641454.1|ENSG00000290647.1|-|OTTHUMT00000493221.1|ENST00000641454|ENSG00000290647|2853	2.853	0	0	0	0	1	2	3	1.05152	0	0	0	0	0	0	0	0	0	0.0452278	0	0	0	0	0	0	0	0	0	0	0	0
ENST00000641519.1|ENSG00000290668.1|-|OTTHUMT00000493468.1|ENST00000641519|ENSG00000290668|1479	1.479	0	0	0	0	1	2	3	2.0284	0	0	0	0	0	0	0	0	0	0	0	0	0	0	0	0	0	0	0	0	0	0
ENST00000642139.1|ENSG00000284703.1|OTTHUMG00000192282.1|OTTHUMT00000493391.1|ENST00000642139|ENSG00000284703|4817	4.817	0	0	0	0	0	3	3	0.622794	0	0.00697117	0	0	0.0288462	0	0.00221521	0	0	0	0	0	0	0	0	0	0.0420518	0	0	0	0	0
ENST00000642310.1|ENSG00000285424.1|OTTHUMG00000192590.2|OTTHUMT00000496923.2|ENST00000642310|ENSG00000285424|3989	3.989	1	0	0	0	0	2	3	0.752068	0.0058799	0.00557283	0	0	0	0	0	0	0	0	0	0	0	0	0	0	0	0	0	0	0	0
ENST00000643862.2|ENSG00000285205.2|OTTHUMG00000192395.2|OTTHUMT00000493797.2|ENST00000643862|ENSG00000285205|4588	4.588	2	0	0	0	0	1	3	0.65388	0	0	0	0	0	0	0	0	0.0226063	0	0.0308727	0.0217043	0	0.0171759	0	0	0	0	0	0	0	0
ENST00000644612.1|ENSG00000232998.3|OTTHUMG00000020054.2|OTTHUMT00000496810.1|VPS13A-AS1-201|VPS13A-AS1|701	0.701	0	0	2	1	0	0	3	4.2796	0	0	0	0	0	0	0	0	0.042519	0.381748	0	0	0	0	0	0	0	0	0	0	0	0
ENST00000645805.1|ENSG00000214049.8|OTTHUMG00000182287.49|OTTHUMT00000471995.4|UCA1-229|UCA1|2365	2.365	0	0	1	0	2	0	3	1.2685	1.56683	1.4618	0	0	0	0.497581	15.5805	5.71723	0.891536	2.58554	1.60791	4.60351	1.80861	2.5004	0	0.0853205	0.0948395	0	0	0	0	0.17071
ENST00000646352.1|ENSG00000285041.1|OTTHUMG00000192364.1|OTTHUMT00000493738.1|ENST00000646352|ENSG00000285041|2636	2.636	0	0	0	0	0	3	3	1.13809	0.0152029	0	0.00385916	0	0	0	0.0213198	0.0164887	0	0	0	0	0.0112266	0.0321906	0	0	0.0832846	0	0	0	0	0
ENST00000647772.1|ENSG00000285961.1|OTTHUMG00000192738.1|OTTHUMT00000498982.1|ENST00000647772|ENSG00000285961|2720	2.72	0	0	0	0	0	3	3	1.10294	0	0	0	0	0	0	0	0	0	0	0	0	0	0	0	0	0	0	0	0	0	0
ENST00000648143.1|ENSG00000285523.1|OTTHUMG00000192989.1|OTTHUMT00000499802.1|ENST00000648143|ENSG00000285523|2908	2.908	0	0	0	0	0	3	3	1.03164	0	0	0	0	0	0	0	0	0	0	0	0	0	0	0	0	0	0	0	0	0	0
ENST00000648191.1|ENSG00000285859.1|OTTHUMG00000193335.1|OTTHUMT00000500495.1|ENST00000648191|ENSG00000285859|2052	2.052	0	0	0	0	1	2	3	1.46199	0.0205714	0.00448946	0	0	0	0	0	0	0	0	0	0	0.0394951	0	0.00771713	0	0	0	0	0	0	0
ENST00000648197.1|ENSG00000285638.1|OTTHUMG00000192938.1|OTTHUMT00000499642.1|ENST00000648197|ENSG00000285638|2438	2.438	0	0	0	0	0	3	3	1.23052	0	0	0	0	0	0	0	0	0	0	0	0	0	0	0	0	0	0	0	0	0	0
ENST00000648218.1|ENSG00000285958.1|OTTHUMG00000193041.2|OTTHUMT00000499979.2|ENST00000648218|ENSG00000285958|6744	6.744	0	0	2	1	0	0	3	0.44484	0.0746089	0.0690853	1.0112	0.869503	8.90987	4.02517	0.805552	0.492155	0.612311	0.34283	0.268779	0.211148	0.56498	0.256176	0	0	0	0	0.0330357	0	0.109076	0.048747
ENST00000648283.1|ENSG00000285530.1|OTTHUMG00000192916.1|OTTHUMT00000499580.1|ENST00000648283|ENSG00000285530|3788	3.788	0	1	0	0	0	2	3	0.791975	0	0.0167568	0.0172426	0.0332972	0.04211	0.00462744	0.00572918	0.00738432	0.0246741	0.134024	0.020122	0	0.0030013	0	0.00615689	0	0.0357675	0.0180027	0	0.0332694	0	0
ENST00000648286.1|ENSG00000285719.2|OTTHUMG00000192749.2|OTTHUMT00000499009.1|ENST00000648286|ENSG00000285719|1950	1.95	0	0	0	0	0	3	3	1.53846	0	0	0	0	0	0	0	0	0	0.154692	0	0	0	0	0	0	0	0	0	0	0	0
ENST00000648355.1|ENSG00000253521.2|OTTHUMG00000164645.2|OTTHUMT00000498750.1|HPYR1-202|HPYR1|2147	2.147	1	0	1	0	0	1	3	1.3973	0	0	0	0.00755197	0	0	0	0	0	0	0	0	0	0	0	0	0	0	0	0	0	0
ENST00000648611.1|ENSG00000228061.7|OTTHUMG00000142920.3|OTTHUMT00000501294.1|ENST00000648611|ENSG00000228061|3945	3.945	0	0	0	0	0	3	3	0.760456	0	0	0.00608348	0.0126563	0.0467947	0.00307719	0.0109678	0	0	0	0	0	0	0	0	0	0	0	0	0	0	0
ENST00000649025.1|ENSG00000285563.1|OTTHUMG00000193374.1|OTTHUMT00000501138.1|ENST00000649025|ENSG00000285563|3700	3.7	0	0	0	0	0	3	3	0.810811	0	0	0	0	0	0	0	0	0	0	0	0	0	0	0	0	0	0	0	0	0	0
ENST00000649808.1|ENSG00000285734.1|OTTHUMG00000192786.1|OTTHUMT00000499135.1|ENST00000649808|ENSG00000285734|3191	3.191	1	0	0	0	1	1	3	0.940144	0	0.00470135	0	0	0	0	0.0646272	0.0386207	0	0	0	0	0	0	0	0	0	0	0	0	0	0
ENST00000651012.1|ENSG00000286000.1|OTTHUMG00000192884.2|OTTHUMT00000499472.2|ENST00000651012|ENSG00000286000|2772	2.772	0	0	0	0	0	3	3	1.08225	0	0	0	0.0350689	0	0.0715983	0	0	0	0	0.37897	0	0.991773	0.561876	0.0469186	0	0.221824	0.311683	0.554489	3.5e-07	0.256156	0.820197
ENST00000651233.1|ENSG00000245060.8|OTTHUMG00000162270.19|OTTHUMT00000502471.1|LINC00847-206|LINC00847|4044	4.044	1	0	1	1	0	0	3	0.74184	0	0	0	0	0	0	0.072141	0.242833	0	0	0	0	0.142739	0.180323	0	0	0	0	0	0	0.0519599	0.014135
ENST00000651462.1|ENSG00000286181.1|OTTHUMG00000193478.2|OTTHUMT00000502008.1|ENST00000651462|ENSG00000286181|3780	3.78	0	0	0	0	0	3	3	0.793651	0	0.0274256	0	0	0.25294	0.236055	0	0.0188604	0	0	0	0	0.0101287	0	0.00250446	0.0151154	0	0	0	0	0.0186841	0
ENST00000651482.1|ENSG00000245164.10|OTTHUMG00000165025.4|OTTHUMT00000504081.1|LINC00861-205|LINC00861|1448	1.448	0	0	1	0	1	1	3	2.07182	0.767468	0.798163	0.118528	0.106554	0.73028	0.542106	0.279517	0.102537	0	0.248542	0.185629	0	0.199686	0	0	0	0	0	0	0	0	0
ENST00000651727.1|ENSG00000290611.1|-|OTTHUMT00000499300.1|CYP2G1P-203|CYP2G1P|1721	1.721	1	0	0	0	0	2	3	1.74317	0	0	0.0115972	0.0321385	0	0	0.00790637	0	0	0	0	0	0	0	0	0	0	0	0	0	0.0452745	0
ENST00000651734.1|ENSG00000176728.10|OTTHUMG00000036505.19|OTTHUMT00000504141.1|TTTY14-214|TTTY14|7093	7.093	1	0	0	1	0	1	3	0.422952	0	0	0	0.00872249	0	0	0	0	0	0	0	0	0.00608391	0.0173008	0.00708836	0.000799988	0	0	0.0175477	0.00122305	0.0309154	0
ENST00000651844.1|ENSG00000286214.1|OTTHUMG00000193470.2|OTTHUMT00000501995.2|COPG2IT1-201|COPG2IT1|7947	7.947	0	3	0	0	0	0	3	0.377501	0	0	0	0	0	0	0	0	0	0.0800831	0.00856209	0.0361235	0.0299029	0.0190565	0.0057307	0	1.42589	1.23268	0.648314	1.41916	1.91578	2.05595
ENST00000651909.1|ENSG00000224897.9|OTTHUMG00000157170.13|OTTHUMT00000503918.1|POT1-AS1-210|POT1-AS1|3183	3.183	0	0	0	0	0	3	3	0.942507	0	0	0	0	0	0	0	0	0	0	0	0	0	0	0	0	0	0	0	0	0	0
ENST00000652012.1|ENSG00000286208.1|OTTHUMG00000193314.1|OTTHUMT00000500697.1|ENST00000652012|ENSG00000286208|4030	4.03	0	0	0	0	0	3	3	0.744417	1.99099	1.52736	5.10312	5.45327	58.3369	15.1652	1.65581	0.0720526	2.97814	1.0284	6.19402	6.35114	6.59174	8.65203	0.0115083	0	0	0.232546	0.323097	0.383755	0.164673	0.0286699
ENST00000652367.1|ENSG00000286010.1|OTTHUMG00000193743.1|OTTHUMT00000504082.1|ENST00000652367|ENSG00000286010|4601	4.601	0	1	0	0	0	2	3	0.652032	0	0	0.0106522	0	0	0	0	0	0	0	0	0	0	0	0.00291246	0	0	0	0.0295805	0.0569739	0.0248863	0.0122634
ENST00000652517.1|ENSG00000286157.1|OTTHUMG00000193176.1|OTTHUMT00000500368.1|ENST00000652517|ENSG00000286157|1406	1.406	0	0	2	1	0	0	3	2.13371	0	0	0	0	0	0	0	0	0	0	0	0	0	0	0	0	0	0	0	0	0	0
ENST00000653041.1|ENSG00000286643.1|OTTHUMG00000194542.1|OTTHUMT00000518478.1|ENST00000653041|ENSG00000286643|2138	2.138	0	0	1	0	0	2	3	1.40318	0	0	0	0	0	0	0	0	0	0	0	0	0	0	0	0	0	0	0	0	0	0
ENST00000653769.1|ENSG00000228392.3|OTTHUMG00000020686.2|OTTHUMT00000523079.1|ENST00000653769|ENSG00000228392|3318	3.318	0	0	0	0	0	3	3	0.904159	0	0	0.00751098	0.010937	0	0	0	0	0	0	0	0	0	0	0	0	0	0	0	0	0	0
ENST00000654083.2|ENSG00000269893.10|OTTHUMG00000183991.6|OTTHUMT00000467703.2|SNHG8-207|SNHG8|6166	6.166	0	1	0	0	0	2	3	0.486539	0.250469	0.149894	0.0192701	0.0744581	0	0.372007	2.43546	3.0134	9.51508	6.77715	0.573059	0.563702	0.55183	0.425433	0.151179	0.342159	8.45585	7.42025	0.714192	0.912945	1.28236	1.03119
ENST00000654189.1|ENSG00000287796.1|OTTHUMG00000195043.1|OTTHUMT00000523934.1|ENST00000654189|ENSG00000287796|3691	3.691	0	0	0	0	0	3	3	0.812788	0	0.218248	0.0573531	0	0.000261699	0.0377551	0	0	0.128344	0.0961801	0	0.888964	0.130325	0.441278	0	0	0.141682	0.034549	0.0378358	0.0181823	0.0191937	0.0156486
ENST00000654383.1|ENSG00000256925.3|OTTHUMG00000019301.4|OTTHUMT00000522559.1|ADGRA1-AS1-203|ADGRA1-AS1|3295	3.295	0	0	1	1	1	0	3	0.91047	0	0	0	0	0	0	0	0	0	0	0	0	0	0	0	0	0.0642493	0	0	0	0	0
ENST00000654612.1|ENSG00000287823.1|OTTHUMG00000193811.1|OTTHUMT00000504974.1|ENST00000654612|ENSG00000287823|5552	5.552	0	0	1	1	0	1	3	0.540346	0	0	0	0	0	0	0	0	0	0	0	0	0	0	0	0	0	0	0	0	0	0
ENST00000654745.1|ENSG00000287408.1|OTTHUMG00000195876.1|OTTHUMT00000529178.1|ENST00000654745|ENSG00000287408|3169	3.169	1	0	0	0	0	2	3	0.946671	0	0	0	0	0.0204957	0	0	0	0	0	0	0	0	0	0	0	0	0	0	0	0	0
ENST00000655032.1|ENSG00000287029.1|OTTHUMG00000194859.1|OTTHUMT00000522668.1|ENST00000655032|ENSG00000287029|3915	3.915	0	0	0	0	0	3	3	0.766284	0	0	0	0	0	0	0	0	0	0	0	0	0	0	0	0	0	0	0	0	0	0
ENST00000655061.1|ENSG00000286693.1|OTTHUMG00000195555.1|OTTHUMT00000527534.1|ENST00000655061|ENSG00000286693|2491	2.491	0	0	0	0	1	2	3	1.20434	0	0	0	0	0	0	0	0	0	0	0	0	0	0	0	0	0	0	0	0	0	0
ENST00000656024.1|ENSG00000227354.7|OTTHUMG00000017131.5|OTTHUMT00000521796.1|RBM26-AS1-206|RBM26-AS1|4770	4.77	0	0	0	0	0	3	3	0.628931	0	0.044911	0	0	0	0	0.102888	0	0	0.0296292	0	0	0.0252625	0	0	0.0606964	0	0.0276119	0.0425611	0.102713	0.393147	0.793076
ENST00000656173.1|ENSG00000233967.7|OTTHUMG00000015092.6|OTTHUMT00000522175.2|ENST00000656173|ENSG00000233967|4443	4.443	0	0	0	0	1	2	3	0.675219	0.144677	0.049557	0.00353565	0.0951579	0.955274	0.216874	0.00481445	0.0175452	0.0400835	0	0	0	0.239096	0	0.173309	0.0237238	0.0110615	0.111131	0.490587	0.573707	0.566622	0.602152
ENST00000656215.1|ENSG00000287550.1|OTTHUMG00000195536.1|OTTHUMT00000527445.1|ENST00000656215|ENSG00000287550|3218	3.218	0	0	0	0	1	2	3	0.932256	NA	NA	NA	NA	NA	NA	NA	NA	NA	NA	NA	NA	NA	NA	NA	NA	NA	NA	NA	NA	NA	NA
ENST00000656552.1|ENSG00000286884.1|OTTHUMG00000194560.1|OTTHUMT00000518683.1|ENST00000656552|ENSG00000286884|1462	1.462	0	0	0	0	1	2	3	2.05198	0	0	0	0.041503	0	0	0	0	0.0545624	0	0	0	0	0	0	0	0	0	0	0	0	0
ENST00000656674.1|ENSG00000288068.1|OTTHUMG00000195880.1|OTTHUMT00000529213.1|ENST00000656674|ENSG00000288068|4007	4.007	0	1	0	0	0	2	3	0.74869	0.00756876	0	0	0.00635723	0.0108651	0	0	0.0139012	0	0	0	0	0	0	0	0	0	0	0	0	0	0
ENST00000657332.1|ENSG00000287554.1|OTTHUMG00000195293.1|OTTHUMT00000525980.1|ENST00000657332|ENSG00000287554|3376	3.376	0	0	0	0	0	3	3	0.888626	0.0117212	0	0.00353581	0	0	0.0200128	0	0	0.0317854	0	0.000170566	0.0239995	0.00186336	0	0	0	0	0	0.0209409	0	0	0.0173019
ENST00000657572.1|ENSG00000267278.6|OTTHUMG00000180362.4|OTTHUMT00000524569.1|MAP3K14-AS1-212|MAP3K14-AS1|2191	2.191	1	0	0	1	0	1	3	1.36924	NA	NA	NA	NA	NA	NA	NA	NA	NA	NA	NA	NA	NA	NA	NA	NA	NA	NA	NA	NA	NA	NA
ENST00000657742.1|ENSG00000236404.12|OTTHUMG00000019448.5|OTTHUMT00000522679.1|VLDLR-AS1-210|VLDLR-AS1|4163	4.163	0	0	0	0	1	2	3	0.720634	NA	NA	NA	NA	NA	NA	NA	NA	NA	NA	NA	NA	NA	NA	NA	NA	NA	NA	NA	NA	NA	NA
ENST00000657841.1|ENSG00000198496.12|OTTHUMG00000192466.2|OTTHUMT00000526261.1|NBR2-204|NBR2|1895	1.895	0	0	0	1	0	2	3	1.58311	0.970106	0.749536	3.35405	2.78919	14.8813	13.035	6.22695	5.4752	2.40497	3.84055	3.59992	6.10628	5.70113	9.53768	1.43911	3.02518	0	0	2.92474	3.80751	4.33115	5.64374
ENST00000658020.1|ENSG00000242671.2|OTTHUMG00000159455.2|OTTHUMT00000355496.2|LINC02010-203|LINC02010|4232	4.232	0	0	0	0	0	3	3	0.708885	0	0	0.00581233	0	0.0660406	0.0157568	0	0	0	0	0	0	0	0	0	0	0	0	0	0	0	0
ENST00000658492.1|ENSG00000259070.9|OTTHUMG00000170746.9|OTTHUMT00000522743.1|LINC00639-210|LINC00639|5789	5.789	0	0	0	1	0	2	3	0.518224	NA	NA	NA	NA	NA	NA	NA	NA	NA	NA	NA	NA	NA	NA	NA	NA	NA	NA	NA	NA	NA	NA
ENST00000658651.1|ENSG00000287399.1|OTTHUMG00000195741.1|OTTHUMT00000528548.1|ENST00000658651|ENSG00000287399|2075	2.075	0	0	0	0	1	2	3	1.44578	0.0196214	0.0168652	0.0250928	0.0362668	0.213959	0.0340492	0	0	0	0	0	0	0	0	0	0	0	0	0	0	0	0
ENST00000659131.1|ENSG00000287867.1|OTTHUMG00000195827.1|OTTHUMT00000528939.1|ENST00000659131|ENSG00000287867|6246	6.246	0	0	0	0	0	3	3	0.480307	0	0	0	0	0	0	0	0	0	0	0	0	0	0	0	0	0	0	0	0	0	0
ENST00000659310.1|ENSG00000286416.1|OTTHUMG00000194868.1|OTTHUMT00000522727.1|ENST00000659310|ENSG00000286416|3514	3.514	0	0	1	1	0	1	3	0.853728	0.188166	0.146532	0.124647	0.110188	0.646719	0.370154	0.563457	0.360342	0.240479	0.408613	0.0844956	1.28e-09	0.0407238	0.0218133	0.278868	0.402911	0.61843	0.478264	0.0549412	0.0379738	0.0289831	0.0706861
ENST00000660123.1|ENSG00000268686.2|OTTHUMG00000183172.4|OTTHUMT00000521936.2|ENST00000660123|ENSG00000268686|3387	3.387	1	0	0	0	0	2	3	0.88574	0.203083	0.106788	0.00170701	0.113995	0.518284	0.152805	0.0161702	0.0565579	0.302341	0.241779	0.0762602	0.250426	0.162254	0.166002	0	0	0	0	0	0	0	0
ENST00000660403.1|ENSG00000285847.2|OTTHUMG00000192950.2|OTTHUMT00000527960.1|ENST00000660403|ENSG00000285847|3664	3.664	1	0	0	0	0	2	3	0.818777	0	0.00529966	0	0.00327653	0	0	0	0	0	0	0	0	0	0	0	0	0	0	0	0	0	0
ENST00000660831.1|ENSG00000176659.11|OTTHUMG00000032880.3|OTTHUMT00000506367.1|LINC02910-203|LINC02910|2727	2.727	0	0	0	0	0	3	3	1.10011	0	0	0.00844878	0	0	0	0	0	0	0	0	0	0	0	0	0	0	0	0	0.0723786	0	0
ENST00000661103.1|ENSG00000224957.7|OTTHUMG00000154876.4|OTTHUMT00000528599.1|LINC01266-206|LINC01266|4567	4.567	0	0	0	0	0	3	3	0.656886	NA	NA	NA	NA	NA	NA	NA	NA	NA	NA	NA	NA	NA	NA	NA	NA	NA	NA	NA	NA	NA	NA
ENST00000661218.1|ENSG00000224404.2|OTTHUMG00000150930.2|OTTHUMT00000515316.1|ENST00000661218|ENSG00000224404|4586	4.586	0	0	0	0	1	2	3	0.654165	0	0	0	0	0	0	0	0	0	0	0	0	0	0	0	0	0	0	0	0	0	0
ENST00000661869.1|ENSG00000286675.1|OTTHUMG00000195612.1|OTTHUMT00000527783.1|ENST00000661869|ENSG00000286675|4630	4.63	1	0	0	1	0	1	3	0.647948	0.000916278	0.00294855	0.0127429	0.00769646	0	0	0	0.00595552	0.109168	0.00750879	0	0	0	0.0149265	0.0167481	0.00908291	0.143519	0.0746708	0.0208728	0.0257398	0.121463	0.0447303
ENST00000661895.1|ENSG00000287336.1|OTTHUMG00000195821.1|OTTHUMT00000528910.1|ENST00000661895|ENSG00000287336|2299	2.299	1	0	0	0	0	2	3	1.30492	0.0175811	0	0.0111395	0	0	0.0303152	0.0149247	0	0	0	0	0	0	0	0	0	0	0	0	0	0	0
ENST00000662953.1|ENSG00000225964.6|OTTHUMG00000151730.2|OTTHUMT00000524462.1|NRIR-203|NRIR|2055	2.055	0	0	0	1	0	2	3	1.45985	0	0	0	0	0	0	0.0191976	0	0	0	0	0	0	0	0	0	0	0	0	0	0	0
ENST00000663040.1|ENSG00000287245.1|OTTHUMG00000194904.1|OTTHUMT00000523036.1|ENST00000663040|ENSG00000287245|3696	3.696	0	0	0	0	0	3	3	0.811688	0.0766616	0.030613	0	0	0	0	0.00925215	0.0640834	0	0	0.108021	0	0.0170654	0	0	0	0	0	0	0	0	0
ENST00000663117.1|ENSG00000287286.1|OTTHUMG00000195649.1|OTTHUMT00000527959.1|ENST00000663117|ENSG00000287286|6656	6.656	0	0	0	0	0	3	3	0.450721	0	0	0.0109003	0.00528455	0	0	0	0	0.0151442	0	0	0.014527	0	0	0.0230484	0.00841679	0	0.00374114	0.128807	0	0.0603366	0
ENST00000663545.1|ENSG00000287373.1|OTTHUMG00000195241.1|OTTHUMT00000525531.1|ENST00000663545|ENSG00000287373|3585	3.585	0	0	0	0	0	3	3	0.83682	0	0	0	0.0032769	0	0	0	0	0	0.147029	0.0803321	0.310258	0.209424	0.20331	0	0	0.0583777	0.0357035	0.0960793	0.147843	0	0.063968
ENST00000663568.1|ENSG00000287344.1|OTTHUMG00000195769.1|OTTHUMT00000528648.1|ENST00000663568|ENSG00000287344|2185	2.185	0	0	0	0	0	3	3	1.373	0	0	0	0	0	0	0	0	0	0	0	0	0	0	0	0	0	0	0	0	0	0
ENST00000663846.2|ENSG00000230910.6|OTTHUMG00000014981.5|OTTHUMT00000041119.2|ADGRB3-DT-209|ADGRB3-DT|4345	4.345	0	0	0	0	0	3	3	0.690449	NA	NA	NA	NA	NA	NA	NA	NA	NA	NA	NA	NA	NA	NA	NA	NA	NA	NA	NA	NA	NA	NA
ENST00000663941.1|ENSG00000241231.2|OTTHUMG00000158223.9|OTTHUMT00000528823.1|ENST00000663941|ENSG00000241231|1757	1.757	0	0	0	0	0	3	3	1.70746	NA	NA	NA	NA	NA	NA	NA	NA	NA	NA	NA	NA	NA	NA	NA	NA	NA	NA	NA	NA	NA	NA
ENST00000664032.1|ENSG00000286497.1|OTTHUMG00000194119.1|OTTHUMT00000511285.1|ENST00000664032|ENSG00000286497|1349	1.349	0	1	0	0	0	2	3	2.22387	0	0	0.0202698	0	0.230196	0	0.0563219	0	0	0.251019	0	0.383874	0	0.151971	0	0	0	0	0	0	0	0
ENST00000664186.1|ENSG00000287979.1|OTTHUMG00000194126.1|OTTHUMT00000511484.1|ENST00000664186|ENSG00000287979|1312	1.312	1	1	0	0	0	1	3	2.28659	16.1345	14.2951	26.1027	40.5597	39.7018	32.3241	1.42925	0.653082	180.187	143.694	14.8697	23.2702	13.1532	22.6164	5.34876	2.67525	27.7782	12.7209	0.839536	1.70635	0.920979	4.32889
ENST00000664243.1|ENSG00000258603.5|OTTHUMG00000171669.4|OTTHUMT00000522888.1|ENST00000664243|ENSG00000258603|2920	2.92	1	0	0	0	0	2	3	1.0274	0	0	0	0	0	0	0	0	0	0	0	0	0	0	0	0	0	0	0	0	0	0
ENST00000664446.1|ENSG00000287032.1|OTTHUMG00000195117.1|OTTHUMT00000524574.1|ENST00000664446|ENSG00000287032|2689	2.689	1	0	0	0	0	2	3	1.11566	0.021695	0	0.115702	0.191065	0.568578	0	0	0	0	0	0.705218	0.980604	1.11945	1.05546	0	0	0.368298	0.114719	0.632614	0.899197	0.374854	0.624516
ENST00000664490.1|ENSG00000269934.3|OTTHUMG00000183900.3|OTTHUMT00000505230.1|ENST00000664490|ENSG00000269934|3188	3.188	0	2	0	1	0	0	3	0.941029	0	1.31e-08	0	0	0	0.0710408	0	0	0	0	0	0.0420336	0	0	0	0	0	0	0	0	0	0
ENST00000664698.1|ENSG00000267064.2|OTTHUMG00000180159.2|OTTHUMT00000520771.1|UXT-AS1-204|UXT-AS1|3445	3.445	0	0	0	0	0	3	3	0.870827	0	0	0.0106377	0.0650517	0.317368	0	0	0.0372258	0	0	0	0	0	0	0	0	0	0	0	0	0	0
ENST00000664890.1|ENSG00000287920.1|OTTHUMG00000195376.1|OTTHUMT00000526681.1|ENST00000664890|ENSG00000287920|4243	4.243	0	0	0	0	0	3	3	0.707047	0	0	0	0	0.132755	0	0	0	0.0738933	0	0.0336474	0	0	0.0374382	0.0382834	0.0133987	0	0.0887099	0	0	0.0164165	0.0402125
ENST00000665362.1|ENSG00000287535.1|OTTHUMG00000195486.1|OTTHUMT00000527184.1|ENST00000665362|ENSG00000287535|1595	1.595	0	0	1	1	0	1	3	1.88088	0	0	0.0668836	0.0486651	0.0949577	0.0456899	0	0	0	0	0.108475	0.152347	0	0.180911	0.0156042	0	0	0	0	0	0	0
ENST00000666058.1|ENSG00000286763.1|OTTHUMG00000195504.1|OTTHUMT00000527243.1|ENST00000666058|ENSG00000286763|2732	2.732	0	0	0	0	0	3	3	1.0981	0	0	0	0	0	0	0	0	0	0	0	0	0	0	0.00533803	0	0.243122	0.241179	0.0479826	0.066012	0	0
ENST00000666094.1|ENSG00000225683.6|OTTHUMG00000187105.3|OTTHUMT00000526498.1|PACRG-AS3-224|PACRG-AS3|2586	2.586	1	0	0	0	0	2	3	1.16009	NA	NA	NA	NA	NA	NA	NA	NA	NA	NA	NA	NA	NA	NA	NA	NA	NA	NA	NA	NA	NA	NA
ENST00000666338.1|ENSG00000250377.2|OTTHUMG00000162631.5|OTTHUMT00000526565.1|ENST00000666338|ENSG00000250377|2803	2.803	0	0	1	1	0	1	3	1.07028	0	0	0	0	0	0	0	0	0	0	0	0	0	0	0	0	0	0	0	0	0	0
ENST00000667165.1|ENSG00000287176.1|OTTHUMG00000195437.1|OTTHUMT00000526886.1|ENST00000667165|ENSG00000287176|2032	2.032	0	0	0	0	0	3	3	1.47638	0	0	0	0	0.0495867	0	0	0	0	0	0	0	0	0	0	0	0	0	0	0	0	0
ENST00000667337.1|ENSG00000287156.1|OTTHUMG00000194974.1|OTTHUMT00000523490.1|ENST00000667337|ENSG00000287156|2032	2.032	1	0	0	2	0	0	3	1.47638	0	0	0	0	0	0	0	0	0	0	0	0	0	0	0.0152567	0.00920205	0.450572	0.626026	0.271338	0.0300756	0.021483	0.094505
ENST00000667357.1|ENSG00000286332.1|OTTHUMG00000195033.1|OTTHUMT00000523867.1|ENST00000667357|ENSG00000286332|3138	3.138	0	0	0	0	0	3	3	0.956023	0	0	0	0	0	0	0	0	0	0	0	0	0	0	0	0	0	0	0	0	0	0
ENST00000667541.1|ENSG00000287181.1|OTTHUMG00000195490.1|OTTHUMT00000527190.1|ENST00000667541|ENSG00000287181|1745	1.745	0	0	0	0	1	2	3	1.7192	0.0473354	0	0	0	0	0	0	0	0	0	0	0.0676631	0	0.0535632	0	0	0	0	0	0.0444956	0	0
ENST00000667623.1|ENSG00000286582.1|OTTHUMG00000194998.1|OTTHUMT00000523623.1|ENST00000667623|ENSG00000286582|2618	2.618	0	0	0	0	0	3	3	1.14591	0	0	0	0	0	0	0	0	0	0	0	0	0	0	0	0	0	0	0	0	0	0
ENST00000667650.1|ENSG00000287613.1|OTTHUMG00000195104.1|OTTHUMT00000524482.1|ENST00000667650|ENSG00000287613|2309	2.309	1	0	0	0	0	2	3	1.29926	0	0	0	0	0	0	0	0	0	0	0	0	0	0	0	0	0	0	0	0	0	0
ENST00000667754.1|ENSG00000286293.1|OTTHUMG00000194992.1|OTTHUMT00000523562.1|ENST00000667754|ENSG00000286293|4140	4.14	1	0	0	0	0	2	3	0.724638	0	0	0.0233358	0	0.0741374	0	0	0	0	0	0	0	0	0	0	0	0	0	0	0	0	0
ENST00000668057.1|ENSG00000286984.1|OTTHUMG00000195551.1|OTTHUMT00000527522.1|ENST00000668057|ENSG00000286984|2478	2.478	1	0	0	0	0	2	3	1.21065	0	0	0	0.0149382	0	0	0	0	0	0	0.0311428	0	0	0	0	0	0	0	0.0903728	0	0	0
ENST00000668244.1|ENSG00000249249.2|OTTHUMG00000155201.3|OTTHUMT00000525161.1|TICAM2-AS1-204|TICAM2-AS1|4176	4.176	1	0	0	1	0	1	3	0.718391	NA	NA	NA	NA	NA	NA	NA	NA	NA	NA	NA	NA	NA	NA	NA	NA	NA	NA	NA	NA	NA	NA
ENST00000668717.1|ENSG00000238194.2|OTTHUMG00000137388.2|OTTHUMT00000525118.1|PHACTR3-AS1-204|PHACTR3-AS1|2244	2.244	0	0	0	1	1	1	3	1.3369	0	0	0	0	0	0	0	0	0	0	0	0	0	0	0	0	0	0	0	0	0	0
ENST00000668822.1|ENSG00000286424.1|OTTHUMG00000194858.1|OTTHUMT00000522661.1|ENST00000668822|ENSG00000286424|1391	1.391	0	0	0	0	1	2	3	2.15672	0	0	0	0	0	0	0	0	0	0	0	0	0	0	0	0	0	0	0	0	0	0
ENST00000668912.1|ENSG00000286402.1|OTTHUMG00000195272.1|OTTHUMT00000525742.1|ENST00000668912|ENSG00000286402|4425	4.425	0	0	0	0	0	3	3	0.677966	0	0	0.00329319	0	0	0	0	0	0	0	0	0	0	0	0	0	0	0	0	0.0128747	0	0
ENST00000668993.1|ENSG00000287781.1|OTTHUMG00000195653.1|OTTHUMT00000528065.1|ENST00000668993|ENSG00000287781|1353	1.353	0	0	1	1	1	0	3	2.21729	0	0	0	0	0	0	0	0	0	0	0	0	0	0	0	0	0	0	0	0	0	0
ENST00000670606.1|ENSG00000287474.1|OTTHUMG00000195740.1|OTTHUMT00000528541.1|ENST00000670606|ENSG00000287474|2843	2.843	0	0	0	0	1	2	3	1.05522	1.03156	1.0792	0.0102998	0.0263731	0	0.814758	0.0932467	0	0	0.113021	0	0	0.0622115	0.0420521	0.00683801	0	0	0.0341634	0.020101	0	0	0
ENST00000670763.1|ENSG00000286496.1|OTTHUMG00000195718.1|OTTHUMT00000528406.1|ENST00000670763|ENSG00000286496|2188	2.188	0	0	0	1	0	2	3	1.37112	0	0	0	0	0	0	0	0	0	0	0	0	0	0	0	0	0	0	0	0	0	0
ENST00000671014.1|ENSG00000258573.6|OTTHUMG00000171009.2|OTTHUMT00000507964.1|RNASE11-AS1-206|RNASE11-AS1|1980	1.98	0	2	0	0	1	0	3	1.51515	0	0	0	0.000359547	0	0	0	0	0	0	0.0299759	0	0.0289002	0.0455813	0	0	0	0	0	0	0	0
ENST00000671073.2|ENSG00000235706.9|OTTHUMG00000150190.6|OTTHUMT00000522002.1|DICER1-AS1-207|DICER1-AS1|3364	3.364	0	0	1	0	1	1	3	0.891795	0	0	0	0	0	0	3.73e-07	0	0	0	0	0	0	0	0	0	0	0	0	0	0.0222458	0
ENST00000671317.1|ENSG00000286713.1|OTTHUMG00000194368.1|OTTHUMT00000515321.1|ENST00000671317|ENSG00000286713|1638	1.638	1	0	0	0	0	2	3	1.8315	0	0	0	0	0	0	0	0	0	0	0	0	0	0	0	0	0	0	0	0	0	0
ENST00000671994.1|ENSG00000288398.1|OTTHUMG00000195922.1|OTTHUMT00000529628.1|ENST00000671994|ENSG00000288398|2662	2.662	0	0	2	1	0	0	3	1.12697	6.47494	5.86411	2.75608	3.35969	10.689	15.9648	8.75125	10.9487	2.42318	2.18009	1.34442	1.56796	1.58876	1.49554	0.72363	0.768296	0.0823224	0.0503547	0.138203	0.185184	0.112137	0.113748
ENST00000673429.1|ENSG00000288300.1|OTTHUMG00000195914.1|OTTHUMT00000529570.1|ENST00000673429|ENSG00000288300|2229	2.229	0	0	1	2	0	0	3	1.3459	0	0	0	0	0	0	0	0	0	0	0	0	0	0	0	0	0	0	0	0	0	0
ENST00000673707.1|ENSG00000288585.1|OTTHUMG00000195952.1|OTTHUMT00000530160.1|ENST00000673707|ENSG00000288585|5800	5.8	0	0	0	0	0	3	3	0.517241	0	0	0	0.0121821	0.047585	0.0113397	0	0	0	0.0670971	0	0.0336615	0	0	0.00396225	0	0.10314	0.105119	0	0.0332421	0	0.0190866
ENST00000675324.1|ENSG00000232677.11|OTTHUMG00000048145.6|-|LINC00665-228|LINC00665|976	0.976	1	0	1	0	1	0	3	3.07377	0.194486	0	0.627104	1.1051	1.47288	2.90561	1.03331	0.726179	0.580534	0.315417	0	0.261294	0.149165	0.656159	0	0	0	0	0	0	0	0
ENST00000676186.1|ENSG00000288638.1|-|-|LNCDAT-207|LNCDAT|1967	1.967	0	0	1	1	0	1	3	1.52517	NA	NA	NA	NA	NA	NA	NA	NA	NA	NA	NA	NA	NA	NA	NA	NA	NA	NA	NA	NA	NA	NA
ENST00000681309.1|ENSG00000288679.1|-|-|ENST00000681309|ENSG00000288679|4064	4.064	1	0	0	0	0	2	3	0.738189	0	0	0.00606438	0.0264633	0	0	0	0	0	0	0.0352931	0	0	0.0196344	0	0	0	0	0	0	0	0.014058
ENST00000684908.1|ENSG00000289128.1|-|-|ENST00000684908|ENSG00000289128|1551	1.551	1	0	0	1	0	1	3	1.93424	0.0187764	0	0.0501816	0.119479	0	0.149696	0	0	0.246109	0.215389	0	0	0	0	0	0	0	0	0	0	0	0.0437682
ENST00000685055.2|ENSG00000289103.2|-|-|ENST00000685055|ENSG00000289103|1310	1.31	0	0	1	2	0	0	3	2.29008	0.162516	0.111715	0.922925	1.19065	3.33488	3.9671	0.0681916	0.0125608	6.40132	4.18542	0.570432	1.20111	0.72893	0.317011	0.448326	0.143366	9.69247	7.32137	0.701204	0.85505	0.0710052	0.394395
ENST00000685149.2|ENSG00000289481.2|-|-|ENST00000685149|ENSG00000289481|799	0.799	1	0	1	1	0	0	3	3.75469	0.289415	0.695879	3.81836	3.87636	8.3163	15.6383	0.520849	0.646876	41.8644	24.5043	3.10866	2.74858	2.1529	2.35956	0.246639	0.0864384	13.3927	7.62297	0.16728	0.300154	0.674947	0.509867
ENST00000685176.2|ENSG00000288871.2|-|-|ENST00000685176|ENSG00000288871|2378	2.378	0	1	0	2	0	0	3	1.26156	0.22047	0.306137	0.569076	0.546742	2.2566	4.14812	0.114907	0.345611	1.57577	1.39715	0.0654413	0.183934	0.339572	0.218375	0.362882	0.148209	1.31897	0.633947	0.190026	0.121015	0.22482	0.312082
ENST00000685341.1|ENSG00000289507.1|-|-|ENST00000685341|ENSG00000289507|1319	1.319	0	0	0	0	0	3	3	2.27445	0.511919	0.582193	0.811527	1.24177	3.072	1.19761	0.956087	0.261496	1.84042	0.90675	3.54011	2.37863	5.29433	3.13896	0.212773	0.663812	0.816709	0.624885	1.24938	0.716416	0.281152	0.725318
ENST00000685687.1|ENSG00000231064.9|OTTHUMG00000035709.2|OTTHUMT00000086850.1|THBS3-AS1-207|THBS3-AS1|1632	1.632	0	0	2	1	0	0	3	1.83824	NA	NA	NA	NA	NA	NA	NA	NA	NA	NA	NA	NA	NA	NA	NA	NA	NA	NA	NA	NA	NA	NA
ENST00000686540.2|ENSG00000288873.2|-|-|ENST00000686540|ENSG00000288873|879	0.879	0	0	1	2	0	0	3	3.41297	0.257885	0.132892	0.136367	0.099305	0.386988	1.60416	0.117079	0.0647077	0	1.22309	0.136041	0	0.226097	0	0.281515	0.153459	0.396426	2.18601	0.54989	0.874966	0.833129	0.745002
ENST00000686897.1|ENSG00000289134.1|-|-|ENST00000686897|ENSG00000289134|1217	1.217	0	0	0	0	0	3	3	2.46508	0	0	0.0182562	0	0.091135	0	0	0	0.107147	0.106559	0	0	0	0.0423961	0	0	0.00100822	0.239771	0	0	0	0
ENST00000687170.1|ENSG00000289411.1|-|-|ENST00000687170|ENSG00000289411|562	0.562	0	0	1	1	1	0	3	5.33808	0	0	0	0	0	0	0	0	0	0	0	0	0	0	0	0	0	0	0	0	0	0
ENST00000687171.2|ENSG00000289447.2|-|-|ENST00000687171|ENSG00000289447|883	0.883	2	0	1	0	0	0	3	3.39751	2.87266	2.73157	7.38914	6.02259	24.6245	18.4794	1.39566	0.921343	98.5545	97.8007	7.95938	18.1456	3.81317	5.24149	0.622097	0	21.2253	18.5435	1.09006	0.123959	0.412903	1.37225
ENST00000687415.1|ENSG00000289617.1|-|-|ENST00000687415|ENSG00000289617|813	0.813	0	0	0	0	1	2	3	3.69004	0	0	0	0	0	0	0	0	0	0	0	0	0	0	0	0	0	0	0	0	0	0
ENST00000687730.2|ENSG00000289038.2|-|-|ENST00000687730|ENSG00000289038|681	0.681	1	0	1	1	0	0	3	4.40529	0.0706183	0.242491	1.00456	1.04556	2.17072	2.67539	0.54845	0.578551	20.2859	13.4451	0.700149	1.30373	1.12215	1.55089	0.216555	0.318876	16.5021	10.1301	0.245928	0.426343	0.989426	1.07956
ENST00000688255.1|ENSG00000288899.1|-|-|ENST00000688255|ENSG00000288899|881	0.881	1	0	0	0	0	2	3	3.40522	2.62328	1.94379	12.0336	12.3771	120.391	17.4993	7.63489	1.39735	31.3718	42.1528	55.272	98.5096	109.783	135.496	5.30274	10.4825	64.7368	59.7377	112.911	125.222	146.536	171.812
ENST00000688804.1|ENSG00000289182.1|-|-|ENST00000688804|ENSG00000289182|1351	1.351	1	0	1	1	0	0	3	2.22058	0.267265	0.136806	0.245304	0.49332	0.412118	0.610355	0.538573	0.45174	0.59749	0.389431	0.036914	0.07375	0.0536125	0.13423	0.238949	0.184533	6.93378	4.69244	0	0	0.110406	0.14928
ENST00000689436.2|ENSG00000289615.2|-|-|ENST00000689436|ENSG00000289615|764	0.764	1	0	1	0	0	1	3	3.9267	0	0	0	0	0	0	0	0	0	0	0	0	0	0	0.0745943	0	0	0	0	0	0	0
ENST00000689787.1|ENSG00000233077.2|OTTHUMG00000032720.1|-|LINC01271-202|LINC01271|4896	4.896	1	0	1	0	0	1	3	0.612745	0	0	0	0	0	0	0.000430899	0.00764343	0	0	0	0	0	0.0381917	0	0	0	0	0.0662204	0	0.00832952	0.0422974
ENST00000690174.1|ENSG00000289279.1|-|-|ENST00000690174|ENSG00000289279|2072	2.072	0	0	0	0	0	3	3	1.44788	0.0406175	0	0	0	0	0	0.00525401	0	0	0	0	0	0	0	0	0	0	0	0	0	0	0
ENST00000690654.1|ENSG00000289602.1|-|-|ENST00000690654|ENSG00000289602|1039	1.039	1	0	1	1	0	0	3	2.88739	0	0	0	0	0	0	0	0	0.146431	0	0.101748	0	0	0.113023	0.510901	0.250583	10.6313	9.40446	1.31739	0.56209	0.614977	1.60058
ENST00000690777.1|ENSG00000288917.1|-|-|ENST00000690777|ENSG00000288917|909	0.909	1	0	1	1	0	0	3	3.30033	0.150058	0	0.343341	0.445086	1.60564	0.839313	0	0	0.6591	1.48276	1.12303	0.30485	2.96262	0	0.507537	0.0752352	0	0	2.33749	3.04386	2.68409	3.2541
ENST00000691300.1|ENSG00000289417.1|-|-|ENST00000691300|ENSG00000289417|1308	1.308	1	0	0	0	0	2	3	2.29358	0	0	0.00684418	0	0.13535	0.0237726	0	0	0	0	0	0	0	0	0	0	0	0	0	0	0	0
ENST00000691474.2|ENSG00000289370.2|-|-|ENST00000691474|ENSG00000289370|1111	1.111	1	0	1	0	0	1	3	2.70027	0.0395103	0.0336752	0.229568	0.59412	0.579254	0.701488	0.422392	0.435762	0.922503	0.499766	0.182764	0.512802	0.540737	1.62447	0.0471965	0.057866	1.05963	0.973237	0.181239	0.336762	0.275076	0.575905
ENST00000691915.1|ENSG00000288955.1|-|-|ENST00000691915|ENSG00000288955|1390	1.39	1	0	1	0	0	1	3	2.15827	0.304151	0.156815	0.352391	0.484373	0.333504	0.268033	0.0361637	0.0116569	1.89957	1.56513	0.0655171	0.459922	0.0559396	0.145658	0	0.0446618	1.13615	0.115897	0	0.0604563	0	0
ENST00000691922.1|ENSG00000289210.1|-|-|ENST00000691922|ENSG00000289210|2324	2.324	0	0	0	0	0	3	3	1.29088	0.347589	0.268902	0.473386	1.13718	3.31419	0.53923	0.211308	0.0633454	4.76121	8.80352	3.29683	6.4295	3.1119	5.65025	0.206646	0.27852	3.97179	4.38523	1.95444	2.0528	1.5525	3.07448
ENST00000692862.1|ENSG00000289590.1|-|-|ENST00000692862|ENSG00000289590|690	0.69	1	0	1	1	0	0	3	4.34783	0	0	0	0	0	0	0	0	0	0	0	0	0	0	0	0	0	0	0	0	0	0
ENST00000693690.1|ENSG00000289201.1|-|-|ENST00000693690|ENSG00000289201|1220	1.22	2	0	0	0	0	1	3	2.45902	NA	NA	NA	NA	NA	NA	NA	NA	NA	NA	NA	NA	NA	NA	NA	NA	NA	NA	NA	NA	NA	NA
ENST00000693691.2|ENSG00000286039.3|OTTHUMG00000192679.1|-|ENST00000693691|ENSG00000286039|2000	2	0	0	1	1	0	1	3	1.5	0	0	0	0	0	0	0	0	0	0	0	0.0568633	0	0	0	0	0	0	0	0	0	0.0321295
ENST00000699473.1|ENSG00000213963.7|OTTHUMG00000132531.15|-|ENST00000699473|ENSG00000213963|4833	4.833	0	0	0	0	0	3	3	0.620732	0	0.0319517	0	0	0	0	0.00479698	0	0	0	0	0	0	0	0	0	0	0	0	0.0319204	0	0
ENST00000701501.1|ENSG00000231563.3|OTTHUMG00000039975.2|-|ENST00000701501|ENSG00000231563|988	0.988	0	0	1	0	1	1	3	3.03644	0.165146	0.142176	0	0	0.929534	0	0.43676	0.175047	0	0	0	0	0.324527	0	0	0	0	0	0	0	0	0
ENST00000702633.1|ENSG00000290045.1|-|-|ENST00000702633|ENSG00000290045|1379	1.379	1	0	1	1	0	0	3	2.17549	0	0	0	0	0	0	0	0	0	0	0	0	0	0	0	0	0	0	0	0	0	0
ENST00000703580.1|ENSG00000290199.1|-|-|ENST00000703580|ENSG00000290199|1586	1.586	0	0	2	1	0	0	3	1.89155	0.268208	0.471995	0.0358597	0.0381755	0	1.46994	1.10769	1.72653	0	0	0.138679	0	0.0963075	0	0.275704	0.194395	0	0.337441	0.426344	0	0	0.29961
ENST00000305709.5|ENSG00000170161.7|OTTHUMG00000013294.6|OTTHUMT00000037077.1|FAM88B-201|FAM88B|2541	2.541	0	0	1	0	0	1	2	0.787092	0.07777	0.0271734	0.0199857	0	0	0.0651162	0.00888591	0	0.264782	0.529934	0	0	0	0.0672419	0.00938816	0	0.696004	0.372523	0	0	0.0296396	0.024032
ENST00000310771.8|ENSG00000272752.6|OTTHUMG00000186252.1|OTTHUMT00000472500.1|STAG3L5P-PVRIG2P-PILRB-201|STAG3L5P-PVRIG2P-PILRB|3634	3.634	0	0	0	1	1	0	2	0.550358	11.7151	11.4163	17.6252	14.9573	83.284	141.554	10.0251	11.8276	5.72354	6.13661	1.42843	2.00916	4.81544	3.1265	5.41282	1.9162	1.70975	1.77559	3.64292	3.41151	5.75741	6.70803
ENST00000317008.4|ENSG00000178412.4|OTTHUMG00000180271.2|OTTHUMT00000450524.1|CTDP1-DT-201|CTDP1-DT|1111	1.111	0	0	1	1	0	0	2	1.80018	0.0574293	0.0207226	0	0	0	0.13548	0	0.104328	0	0	0	0	0	0	0.0123665	0.0477489	0	0	0	0	0	0.0125079
ENST00000322495.4|ENSG00000290586.1|-|OTTHUMT00000474594.1|ENST00000322495|ENSG00000290586|2599	2.599	0	0	0	1	0	1	2	0.769527	0	0	0	0	0	0	0	0	0	0	0	0	0	0.0981994	0	0	0	0	0	0.0272128	0	0
ENST00000326341.8|ENSG00000178803.12|OTTHUMG00000150735.9|OTTHUMT00000319994.3|ADORA2A-AS1-201|ADORA2A-AS1|2557	2.557	0	0	1	1	0	0	2	0.782167	0	0	0	0	0	0	0	0	0	0	0	0	0	0	0	0	0	0	0	0	0	0
ENST00000333487.2|ENSG00000184068.2|OTTHUMG00000151272.1|OTTHUMT00000322047.1|SREBF2-AS1-201|SREBF2-AS1|2989	2.989	0	0	1	1	0	0	2	0.66912	0.0802352	2.6e-05	0.21823	0.183153	0.950721	0.706697	0.018544	0.0430243	0.876487	0.511485	0.199887	0.280972	0.130046	0.38915	0.289712	0.135514	1.48684	1.6706	0	0.30047	0.171184	0.556711
ENST00000340510.8|ENSG00000188185.13|OTTHUMG00000155273.10|OTTHUMT00000339278.1|LINC00265-201|LINC00265|3049	3.049	0	0	0	2	0	0	2	0.655953	0.0551559	0.0372881	0	0.0530096	0.176616	0.673011	0.0540652	0.0955139	0.0888048	0	0.0634955	0	0.215452	0.0786585	0.0576503	0.116844	0	0	0.162998	0.188842	0.133921	0.047073
ENST00000342991.10|ENSG00000290788.1|-|OTTHUMT00000268795.1|ENST00000342991|ENSG00000290788|1971	1.971	2	0	0	0	0	0	2	1.01471	0	0.0534755	0.0263819	0	0.255061	0.246213	0	0	0	0	0	0	0	0	0.425414	0.151377	1.13473	2.01097	3.55605	3.95876	6.91529	11.0571
ENST00000355358.1|ENSG00000197308.9|OTTHUMG00000156966.1|OTTHUMT00000346864.1|GATA3-AS1-201|GATA3-AS1|2214	2.214	0	0	1	1	0	0	2	0.903342	0	0	0	0	0	0	0	0	0	0	0	0	0	0	0	0	0.102785	0	0	0	0	0
ENST00000357802.7|ENSG00000291035.1|-|OTTHUMT00000320446.1|RRP7BP-202|RRP7BP|2387	2.387	0	0	1	0	1	0	2	0.837872	0	0	0	0	0	0	0.0385861	0	0	0	0	0	0	8.99e-09	0	0	0.131273	0.32459	0.164218	0.291978	0.339872	0.258624
ENST00000360035.6|ENSG00000290811.1|-|OTTHUMT00000095720.1|NXF4-202|NXF4|3617	3.617	0	0	0	0	0	2	2	0.552944	0.113069	0.0688826	0.0474382	0.0370403	0.0604014	0.126802	0	0.00602142	0.0294108	0.0475687	0.05031	0.0372791	0	0.0985574	0	0	0	0	0	0	0	0
ENST00000360083.3|ENSG00000196096.3|OTTHUMG00000154847.1|OTTHUMT00000337357.1|SPAG16-DT-201|SPAG16-DT|1727	1.727	0	0	0	0	0	2	2	1.15808	0	0	0	0	0.0414684	0.0417224	0	0	0	0	0	0	0	0	0.0199985	0.0165851	0	0	0.0681177	0	0	0
ENST00000361350.5|ENSG00000198711.5|OTTHUMG00000008365.2|OTTHUMT00000023027.2|SSBP3-AS1-201|SSBP3-AS1|2624	2.624	0	0	0	1	1	0	2	0.762195	0.0611058	0.039396	0.0868689	0.0140418	1.15137	0.314869	0.0214289	0.0386705	0.25494	0.10815	0.0872832	0.122675	0.050395	0.194187	0.00907112	0	0	0.2561	0.168716	0.484324	0.199636	0.323924
ENST00000366218.2|ENSG00000203395.2|OTTHUMG00000152574.1|OTTHUMT00000326816.1|ENST00000366218|ENSG00000203395|1416	1.416	0	0	1	0	0	1	2	1.41243	0.029793	0	0	0	0	0	0	0	0	0	0	0	0	0	0	0	0	0	0	0	0	0
ENST00000370257.1|ENSG00000203900.2|OTTHUMG00000032958.2|OTTHUMT00000280681.1|ENST00000370257|ENSG00000203900|3264	3.264	0	0	1	1	0	0	2	0.612745	0	0	0	0	0	0	0	0	0	0	0	0	0	0	0	0	0	0	0	0.0208935	0	0
ENST00000373171.3|ENSG00000226070.2|OTTHUMG00000014659.1|OTTHUMT00000040481.1|LINC00951-201|LINC00951|9313	9.313	0	0	0	1	0	1	2	0.214754	0	0	0	0	0	0	0	0	0	0	0	0	0	0	0	0	0	0	0	0	0	0
ENST00000376617.3|ENSG00000256943.1|OTTHUMG00000167981.1|OTTHUMT00000397298.2|ENST00000376617|ENSG00000256943|1766	1.766	0	0	1	1	0	0	2	1.1325	0	0	0	0	0	0	0	0	0	0	0	0	0	0	0	0	0	0	0	0	0	0
ENST00000377652.4|ENSG00000204850.4|OTTHUMG00000186768.2|OTTHUMT00000473742.2|ENST00000377652|ENSG00000204850|1995	1.995	1	0	0	1	0	0	2	1.00251	0	0	0	0	0	0	0	0	0	0	0	0	0	0	0	0	0	0	0	0	0	0
ENST00000378347.2|ENSG00000205018.2|OTTHUMG00000175522.2|OTTHUMT00000430363.2|ENST00000378347|ENSG00000205018|1812	1.812	0	0	0	1	0	1	2	1.10375	0	0	0	0	0	0	0	0	0	0	0	0	0	0	0	0	0	0	0	0	0	0
ENST00000378432.1|ENSG00000205041.1|OTTHUMG00000178320.1|OTTHUMT00000441512.1|ENST00000378432|ENSG00000205041|1462	1.462	0	0	0	1	1	0	2	1.36799	0	0.000399356	0	0	0	0.298502	0.723265	0.651904	0	0	0	0	0	0	0	0	0	0	0	0	0	0
ENST00000379317.1|ENSG00000205231.1|OTTHUMG00000000850.1|OTTHUMT00000002419.1|TTLL10-AS1-201|TTLL10-AS1|3532	3.532	0	0	1	1	0	0	2	0.566251	0	0	0	0	0	0	0	0	0.0302067	0	0	0	0	0	0	0	0	0	0	0	0	0
ENST00000379640.1|ENSG00000205325.4|OTTHUMG00000058812.5|OTTHUMT00000130001.1|ENST00000379640|ENSG00000205325|2998	2.998	0	0	0	0	0	2	2	0.667111	0	0	0	0	0	0	0	0	0	0	0	0	0	0	0	0	0	0	0	0	0	0
ENST00000380334.6|ENSG00000290746.1|-|OTTHUMT00000055884.3|CA5BP1-204|CA5BP1|1264	1.264	0	0	1	1	0	0	2	1.58228	0.81711	0.519479	0.0814726	0	0	0.109876	4.67023	13.4082	0.173973	0	0	0.638681	3.52198	0	0.846212	1.48824	0	0.526071	0	0.624005	2.13994	1.15889
ENST00000380970.2|ENSG00000205628.5|OTTHUMG00000156039.25|OTTHUMT00000342819.1|LINC01446-201|LINC01446|3484	3.484	0	0	0	0	0	2	2	0.574053	0.312534	0.0786362	0	0	0.0815754	0	0.0574571	0.0720577	0	0	0.233591	0	0.424534	0.107955	0	0	0	0	0	0	0	0
ENST00000381051.6|ENSG00000197182.16|OTTHUMG00000150446.2|OTTHUMT00000316783.1|MIRLET7BHG-202|MIRLET7BHG|875	0.875	0	0	1	1	0	0	2	2.28571	NA	NA	NA	NA	NA	NA	NA	NA	NA	NA	NA	NA	NA	NA	NA	NA	NA	NA	NA	NA	NA	NA
ENST00000381078.1|ENSG00000205653.2|OTTHUMG00000179311.2|OTTHUMT00000445712.1|ENST00000381078|ENSG00000205653|2007	2.007	0	0	1	1	0	0	2	0.996512	0	0	0	0	0	0	0	0	0	0	0	0	0	0	0	0	0	0	0	0	0	0
ENST00000390681.5|ENSG00000291300.1|OTTHUMG00000191915.2|OTTHUMT00000316380.2|PRSS30P-209|PRSS30P|2881	2.881	0	0	1	1	0	0	2	0.694203	0	0	0	0.0201536	0.396742	0.50696	0	0.00175177	0.26673	0.0970193	0.036079	0.0366518	0	0	0.0665125	0	0	0.0917738	0	0	0	0
ENST00000392620.5|ENSG00000182352.8|OTTHUMG00000067611.4|OTTHUMT00000145090.3|CD300LD-AS1-202|CD300LD-AS1|2525	2.525	1	0	0	0	0	1	2	0.792079	0	0	0	0	0	0	0	0	0	0	0	0	0	0	0	0	0	0	0	0	0	0
ENST00000399186.2|ENSG00000290882.1|-|OTTHUMT00000397578.1|ENST00000399186|ENSG00000290882|2014	2.014	1	0	0	1	0	0	2	0.993049	0	0	0.01288	0	0	0	0	0	0	0	0	0.0563693	0	0	0	0	0	0	0	0	0	0
ENST00000399702.6|ENSG00000291228.1|-|OTTHUMT00000250833.2|ENST00000399702|ENSG00000291228|2762	2.762	0	0	2	0	0	0	2	0.724113	0.519311	0.521779	1.73178	1.16429	9.15835	12.1201	1.22393	1.40463	3.23432	3.45348	1.99958	2.55908	2.71814	2.79624	0.431993	0.514554	3.29203	1.10159	2.01145	2.45066	1.53816	2.83127
ENST00000400221.1|ENSG00000215403.1|OTTHUMG00000150539.1|OTTHUMT00000318811.1|LL22NC01-81G9.3-201|LL22NC01-81G9.3|992	0.992	0	0	0	0	1	1	2	2.01613	0	0	0	0	0	0	0	0	0	0	0.109885	0	0	0	0	0	0	0	0	0	0	0
ENST00000401008.6|ENSG00000290705.1|-|OTTHUMT00000039109.1|ENST00000401008|ENSG00000290705|3498	3.498	0	0	1	0	0	1	2	0.571755	0	0	0.112051	0.0455224	0.511164	0.982942	0.000264958	0	1.01122	1.23928	0.38952	0.0281665	0.186407	0.227114	0.0175653	0	1.12296	0.800223	0.161804	0.20116	0.0318513	0.0824519
ENST00000402221.4|ENSG00000176349.11|OTTHUMG00000151497.1|OTTHUMT00000322896.1|ENST00000402221|ENSG00000176349|2967	2.967	0	0	0	1	1	0	2	0.674082	NA	NA	NA	NA	NA	NA	NA	NA	NA	NA	NA	NA	NA	NA	NA	NA	NA	NA	NA	NA	NA	NA
ENST00000406213.1|ENSG00000218537.1|OTTHUMG00000150772.2|OTTHUMT00000320008.2|MIF-AS1-201|MIF-AS1|1476	1.476	0	0	1	1	0	0	2	1.35501	0	0	0	0	0.333362	0	0.0806082	1.23391	0.323996	0.229298	0.361694	0.0906614	0	0.332384	0.0974678	0.061387	1.22066	0.567261	0.795807	0.562955	0.0437052	0
ENST00000409873.5|ENSG00000290738.1|-|OTTHUMT00000336117.1|URAHP-203|URAHP|1349	1.349	0	0	1	1	0	0	2	1.48258	0.405003	0.399064	0.082479	0.0874048	0.161779	1.09793	1.38471	1.76218	0.396175	0	0	0.191937	0.335526	0.130085	0.259943	0.366136	0.725453	0.362917	0.782601	0.173227	0.402941	0.208424
ENST00000412114.2|ENSG00000290444.1|-|OTTHUMT00000047265.2|FAM238A-202|FAM238A|1091	1.091	0	0	1	1	0	0	2	1.83318	0	0	0	0	0.203435	0	0	0	0	0	0	0	0	0	0	0	0	0	0	0	0	0
ENST00000412674.1|ENSG00000233304.7|OTTHUMG00000000499.5|OTTHUMT00000001241.1|LINC01346-201|LINC01346|3242	3.242	1	0	0	0	0	1	2	0.616903	0	0	0	0	0	0	0.013569	0	0	0	0	0	0	0	0	0	0	0	0	0	0	0
ENST00000413483.1|ENSG00000238184.1|OTTHUMG00000009760.2|OTTHUMT00000143277.1|CD81-AS1-201|CD81-AS1|1460	1.46	0	0	1	1	0	0	2	1.36986	0	0.0183284	0.0303892	0	0	0	0	0.18189	0	0	0	0	0	0	0	0	0	0	0	0	0	0
ENST00000414098.2|ENSG00000234428.2|OTTHUMG00000169229.1|OTTHUMT00000402958.1|ENST00000414098|ENSG00000234428|876	0.876	0	0	0	0	0	2	2	2.28311	0	0	0	0	0.165449	0	0	0	0	0	0	0	0	0	0	0	0	0	0.138398	0	0	0
ENST00000414227.1|ENSG00000243107.1|OTTHUMG00000155860.1|OTTHUMT00000342025.1|ENST00000414227|ENSG00000243107|1589	1.589	0	1	0	0	0	1	2	1.25865	0	0	1.90888	0.352679	0	2.80051	0	0	0	0	0	0	0	0	0.186843	0	0	0	0	0	0.841879	0
ENST00000414532.6|ENSG00000186056.11|OTTHUMG00000003706.3|OTTHUMT00000010461.1|MATN1-AS1-201|MATN1-AS1|3925	3.925	0	0	1	1	0	0	2	0.509554	1.67793	2.1136	2.16145	1.38508	3.05063	10.2304	3.0001	3.21833	1.31773	1.80969	0	0	0	0	0.0409909	0	0.337956	0.43897	0	0	0	0
ENST00000415019.1|ENSG00000176320.2|OTTHUMG00000022444.1|OTTHUMT00000058352.1|ENST00000415019|ENSG00000176320|1999	1.999	0	0	0	0	0	2	2	1.0005	0	0	0	0	0	0	0	0	0	0	0	0	0	0	0	0	0	0	0	0	0	0
ENST00000415992.5|ENSG00000273066.5|OTTHUMG00000186354.1|OTTHUMT00000472993.1|ENST00000415992|ENSG00000273066|4244	4.244	0	0	1	1	0	0	2	0.471254	0.093694	0.310595	0.0455367	0.0253278	0.764664	0.0833539	0.0295509	0.2705	2.17571	0.0429022	1.86348	2.83612	3.03479	0.890475	1.00744	1.00099	4.46575	1.56121	1.18708	0.499752	1.26726	1.06909
ENST00000416069.6|ENSG00000226803.9|OTTHUMG00000014917.6|OTTHUMT00000041041.3|ZNF451-AS1-201|ZNF451-AS1|899	0.899	0	0	1	1	0	0	2	2.22469	0	0	0	0	0	0	0.0362049	0	0	0	0	0	0	0	0.212089	0	0	0	0	0	0	0
ENST00000416951.5|ENSG00000226917.6|OTTHUMG00000067927.5|OTTHUMT00000316000.2|LINC01276-201|LINC01276|816	0.816	0	0	1	1	0	0	2	2.45098	0	0	0	0	0	0	0	0	0	0	0	0	0	0	0	0	0	0	0	0	0	0
ENST00000417404.2|ENSG00000290450.1|-|OTTHUMT00000256203.2|ENST00000417404|ENSG00000290450|4742	4.742	0	0	0	0	0	2	2	0.421763	0	0.0017693	0	0	0	0	0.000623077	0.018321	0.120497	0.319786	0.0765063	0.387944	0.0182784	0.0533134	0.508146	0.861271	0.642317	3.23558	2.98886	5.08817	2.62216	5.59515
ENST00000417786.1|ENSG00000225300.1|OTTHUMG00000040132.1|OTTHUMT00000096784.1|ENST00000417786|ENSG00000225300|1960	1.96	1	1	0	0	0	0	2	1.02041	0	0	0	0	0	0	0	0	0	0	0	0	0	0	0	0	0	0	0	0	0	0
ENST00000418006.1|ENSG00000235049.1|OTTHUMG00000168112.1|OTTHUMT00000398243.1|LINC00940-201|LINC00940|2350	2.35	0	0	1	0	0	1	2	0.851064	0	0	0	0	0	0	0	0	0	0	0	0	0	0.133366	0	0	0	0	0	0	0	0.016109
ENST00000418218.5|ENSG00000233392.5|OTTHUMG00000151847.3|OTTHUMT00000324351.1|UICLM-201|UICLM|2274	2.274	0	0	0	2	0	0	2	0.879507	0	0	0	0	0.0640315	0	0	0	0	0	0	0	0	0	0.720783	0.135558	0	0	0.340256	0.0216459	0	0
ENST00000418273.2|ENSG00000272734.1|OTTHUMG00000185998.2|OTTHUMT00000471962.2|ADIRF-AS1-201|ADIRF-AS1|2627	2.627	0	1	0	1	0	0	2	0.761325	0	0	0	0	0	0	0	0.00551731	0	0	0	0	0	0.0323208	0	0	0	0.0511507	0	0	0	0
ENST00000418602.1|ENSG00000227741.1|OTTHUMG00000031606.1|OTTHUMT00000077411.1|ENST00000418602|ENSG00000227741|1578	1.578	0	0	1	1	0	0	2	1.26743	0.0693081	0.0531113	0	0	0.343238	0.264606	0.0171142	0.0772208	0	0	0	0	0.146984	0.11296	0	0	0	0	0	0	0.0298641	0.0730484
ENST00000418660.2|ENSG00000229520.2|OTTHUMG00000017364.1|OTTHUMT00000045819.1|LINC00404-201|LINC00404|1166	1.166	0	0	1	1	0	0	2	1.71527	0	0	0	0	0	0	0	0	0	0	0	0	0	0	0	0	0	0	0	0	0	0
ENST00000419080.3|ENSG00000226416.3|OTTHUMG00000012474.2|OTTHUMT00000034755.2|MRPL23-AS1-201|MRPL23-AS1|1949	1.949	0	0	0	2	0	0	2	1.02617	0	0	0.0507839	0.0674544	0.381558	0.730615	0.395085	0.727813	0.0972649	0	0	0.0587383	0	0	0.770056	1.19031	0.147192	0.475	0.123348	0.147532	0.063407	0.157809
ENST00000419499.2|ENSG00000235532.2|OTTHUMG00000017079.1|OTTHUMT00000045273.1|LINC00402-201|LINC00402|3396	3.396	0	0	0	0	0	2	2	0.588928	0	0	0	0	0	0	0	0	0	0	0	0	0	0	0	0	0	0	0	0	0	0
ENST00000420572.2|ENSG00000233358.2|OTTHUMG00000014348.2|OTTHUMT00000039995.2|ENST00000420572|ENSG00000233358|871	0.871	0	0	0	0	0	2	2	2.29621	0.0501186	0	0	0	0	0	0	0	0	0	0	0	0	0	0	0	0	0	0	0	0	0
ENST00000420724.1|ENSG00000235725.1|OTTHUMG00000152797.1|OTTHUMT00000327959.1|LINC03050-201|LINC03050|1656	1.656	0	0	1	1	0	0	2	1.20773	0	0	0	0	0	0	0	0.00940834	0	0	0	0	0	0	0	0	0	0	0	0	0	0
ENST00000420777.1|ENSG00000229950.1|OTTHUMG00000014233.1|OTTHUMT00000039812.1|TFAP2A-AS1-201|TFAP2A-AS1|1575	1.575	1	0	1	0	0	0	2	1.26984	0	0	0.0254309	0	0	0	0	0	0	0	0	0	0	0	0	0	0	0.0974492	0	0	0	0
ENST00000420866.1|ENSG00000231453.1|OTTHUMG00000154148.1|OTTHUMT00000334113.1|LINC01305-201|LINC01305|3123	3.123	0	0	1	1	0	0	2	0.64041	0.207653	0.193925	0.0464321	0.014269	0	0.529304	0.45224	0.174514	0	0.312764	0.16628	0.135352	0.023977	2.82e-05	0	0	0	0	0	0	0	0
ENST00000421297.1|ENSG00000226206.1|OTTHUMG00000067508.1|OTTHUMT00000144686.1|ENST00000421297|ENSG00000226206|916	0.916	1	0	0	0	0	1	2	2.18341	0	0	0	0	0	0	0	0	0	0	0	0	0	0	0	0	0	0	0	0	0	0
ENST00000422049.1|ENSG00000227198.1|OTTHUMG00000057503.2|OTTHUMT00000127781.2|C6orf47-AS1-203|C6orf47-AS1|673	0.673	0	0	1	1	0	0	2	2.97177	0	0	0.0792238	0.00534776	0.361753	0.10952	0	0.133818	0	0	0.202784	0	0	0	0.15242	0	0	0	0.116498	0.818607	0.657441	1.76606
ENST00000422194.7|ENSG00000291017.1|-|OTTHUMT00000489474.1|ENST00000422194|ENSG00000291017|703	0.703	0	0	1	1	0	0	2	2.84495	0.212516	0.00830193	0	0	0	0	0.0288222	0	0	0	0	0	0	0	0	0	0	0	0	0	0	0
ENST00000422631.1|ENSG00000225341.1|OTTHUMG00000153979.1|OTTHUMT00000333301.1|ENST00000422631|ENSG00000225341|727	0.727	1	0	0	0	0	1	2	2.75103	0	0	0	0	0	0	0	0	0	0	0	0	0	0	0	0	0	0	0	0	0	0
ENST00000422718.1|ENSG00000226482.1|OTTHUMG00000156514.1|OTTHUMT00000344470.1|ADIPOQ-AS1-201|ADIPOQ-AS1|3443	3.443	0	0	0	0	0	2	2	0.580889	0	0.00987206	0	0.0420277	0	0	0.0243617	0.0450413	0	0	0.0212528	0	0.0369265	0	0	0	0	0	0	0	0	0
ENST00000423083.1|ENSG00000290838.1|-|OTTHUMT00000345924.1|NCF1B-202|NCF1B|1516	1.516	0	0	1	1	0	0	2	1.31926	0	0	0	0	0	0	0	0	0	0	0	0	0	0	0	0	0.242852	0	0	0	0	0
ENST00000423917.5|ENSG00000290423.1|-|OTTHUMT00000047272.1|ENST00000423917|ENSG00000290423|1220	1.22	0	0	1	1	0	0	2	1.63934	0	0.0848911	0.0172791	0.0331994	0.340027	0.0626016	0	0	0	0.144873	0.0791712	0.22222	0.0672414	0.0710662	0	0	0	0	0	0	0	0
ENST00000424133.2|ENSG00000291272.1|-|OTTHUMT00000398566.1|ENST00000424133|ENSG00000291272|2493	2.493	0	0	1	1	0	0	2	0.802246	2.87999	2.86777	4.95333	2.76369	27.1277	63.5292	2.12155	8.58045	4.61027	4.93516	2.38562	1.86886	7.46227	4.77488	1.28289	0.322577	2.20497	2.10387	5.52864	5.47719	7.74593	11.4013
ENST00000424148.1|ENSG00000233930.4|OTTHUMG00000165546.4|OTTHUMT00000384772.1|KRTAP5-AS1-201|KRTAP5-AS1|2265	2.265	0	0	1	0	0	1	2	0.883002	0.0148817	0.0395644	0	0	0	0	0	0	0	0	0	0	0	0	0	0	0	0	0	0	0	0
ENST00000425499.2|ENSG00000228843.2|OTTHUMG00000019883.2|OTTHUMT00000052386.2|ENST00000425499|ENSG00000228843|696	0.696	0	0	1	1	0	0	2	2.87356	0	0	0	0.138797	0	0	0.0240357	0	0	0	0	0	0	0	0	0	0	0.799486	0	0	0	0
ENST00000426044.1|ENSG00000291101.1|-|OTTHUMT00000344136.1|ENST00000426044|ENSG00000291101|917	0.917	0	0	1	1	0	0	2	2.18103	0	0.161382	0	0	0	0	0.0118808	0	0	0	0	0	0	0	0.224719	0.407168	0	0	0	0.252431	0.407862	0.346991
ENST00000426775.1|ENSG00000235782.1|OTTHUMG00000009400.1|OTTHUMT00000026080.1|ENST00000426775|ENSG00000235782|749	0.749	0	0	0	0	0	2	2	2.67023	0	0	0	0	0	0	0	0	0	0	0	0	0	0	0	0	0	0	0	0	0	0
ENST00000428066.7|ENSG00000130600.21|OTTHUMG00000012477.7|OTTHUMT00000142905.4|H19-206|H19|1243	1.243	0	0	1	0	0	1	2	1.60901	NA	NA	NA	NA	NA	NA	NA	NA	NA	NA	NA	NA	NA	NA	NA	NA	NA	NA	NA	NA	NA	NA
ENST00000428495.2|ENSG00000229771.2|OTTHUMG00000032473.2|OTTHUMT00000079231.2|ENST00000428495|ENSG00000229771|1669	1.669	0	0	0	0	1	1	2	1.19832	0	0	0	0	0	0	0	0	0	0	0	0	0	0	0	0	0	0	0	0	0	0
ENST00000428828.1|ENSG00000241832.1|OTTHUMG00000150063.1|OTTHUMT00000316076.1|CECR3-201|CECR3|1915	1.915	0	0	0	1	0	1	2	1.04439	0	0	0	0	0	0	0	0	0.0573616	0	0	0	0	0	0	0	0	0	0	0.0169518	0	0
ENST00000429214.1|ENSG00000236514.1|OTTHUMG00000017979.1|OTTHUMT00000047605.1|ENST00000429214|ENSG00000236514|826	0.826	0	0	1	1	0	0	2	2.42131	0.194457	0.69163	0	0.242307	0.590242	0.340098	0.183407	0.117742	2.31785	0.242538	0.306277	0	0	0.360011	0	0	0	0	0	0.202106	0.356996	0
ENST00000430666.1|ENSG00000227375.6|OTTHUMG00000155484.4|OTTHUMT00000340294.1|DLG1-AS1-202|DLG1-AS1|1694	1.694	0	0	1	1	0	0	2	1.18064	0.133669	0.0684285	0.0203704	0	0	0	0	0	0	0	0.356095	0	0.139269	0.0717856	0.0609446	0.185635	0.180987	0	0.179787	0.375154	0.000326115	0.260614
ENST00000431020.1|ENSG00000230923.2|OTTHUMG00000152633.3|OTTHUMT00000327085.1|LINC00309-201|LINC00309|3307	3.307	0	0	0	1	0	1	2	0.604778	0	0	0	0	0.0350098	0	0	0	0	0	0	0	0	0	0	0.0173926	0	0	0	0	0	0
ENST00000431202.1|ENSG00000235143.1|OTTHUMG00000043647.1|OTTHUMT00000102020.1|ENST00000431202|ENSG00000235143|1747	1.747	0	0	1	0	0	1	2	1.14482	0	0	0.0150887	0	0	0	0	0	0	0	0	0	0	0	0	0	0	0	0	0	0	0
ENST00000431442.2|ENSG00000234156.3|OTTHUMG00000020611.4|OTTHUMT00000502262.1|ENST00000431442|ENSG00000234156|4982	4.982	0	0	0	0	1	1	2	0.401445	0.00999431	0	0	0	0.044357	0	0	0	0	0	0.0145725	0	0	0.0313961	0.0213292	0	0	0	0	0.000124478	0.0234541	0
ENST00000432163.1|ENSG00000229243.2|OTTHUMG00000155652.4|OTTHUMT00000341001.1|LINC01981-201|LINC01981|2833	2.833	0	0	0	0	1	1	2	0.705965	0	0	0	0	0	0	0	0	0	0	0	0	0	0	0	0	0	0	0	0	0	0
ENST00000434017.1|ENSG00000233002.2|OTTHUMG00000059148.2|OTTHUMT00000131040.1|TBC1D26-AS1-202|TBC1D26-AS1|746	0.746	0	0	1	1	0	0	2	2.68097	0.0516974	0	0	0	0	0	0	0	0	0	0	0	0	0	0	0	0	0	0	0	0	0
ENST00000434051.1|ENSG00000231528.3|OTTHUMG00000020516.4|OTTHUMT00000144713.2|FAM225A-201|FAM225A|6100	6.1	0	0	0	1	0	1	2	0.327869	NA	NA	NA	NA	NA	NA	NA	NA	NA	NA	NA	NA	NA	NA	NA	NA	NA	NA	NA	NA	NA	NA
ENST00000435044.2|ENSG00000232643.2|OTTHUMG00000016664.2|OTTHUMT00000044345.2|LINC00385-201|LINC00385|1132	1.132	0	0	1	1	0	0	2	1.76678	0	0	0	0	0	0	0	0	0	0	0	0	0	0	0	0	0	0	0	0	0	0
ENST00000435478.1|ENSG00000230698.1|OTTHUMG00000156715.1|OTTHUMT00000345424.1|ENST00000435478|ENSG00000230698|544	0.544	0	0	1	1	0	0	2	3.67647	0	0	0	0	0	0	0	0	0	0	0	0	0	0	0	0	0	0	0	0	0	0
ENST00000435586.1|ENSG00000237357.2|OTTHUMG00000013230.1|OTTHUMT00000036994.1|FAM88E-202|FAM88E|2579	2.579	0	0	0	1	0	1	2	0.775494	0	0.0187406	0.0295017	0.0286128	0	0	0	0	0.390275	0.110367	0	0	0	0.0330338	0	0	0	0	0	0	0	0
ENST00000436286.2|ENSG00000231703.2|OTTHUMG00000033066.2|OTTHUMT00000080413.2|ENST00000436286|ENSG00000231703|3280	3.28	0	0	0	0	1	1	2	0.609756	0.00798328	0	0	0	0	0	0	0	0.057778	0	0	0.0163862	0	0	0.00376882	0.11974	0	0	0	0.0545442	0.114858	0.208242
ENST00000436857.5|ENSG00000290832.1|-|OTTHUMT00000347341.2|ENST00000436857|ENSG00000290832|1033	1.033	0	0	1	1	0	0	2	1.93611	0	0.0429646	0	0	0	0	0	0.0412378	0	0.186605	0.102719	0	0.086455	0.233945	0.0280211	0	0.298165	0	0	0.126035	0.103513	0.452012
ENST00000437916.2|ENSG00000259439.3|OTTHUMG00000172199.2|OTTHUMT00000417295.1|LINC01833-203|LINC01833|2880	2.88	0	0	0	1	0	1	2	0.694444	0	0	0	0.012705	0	0	0	0	0	0	0	0	0	0	0	0	0	0	0	0	0.032754	0
ENST00000438293.1|ENSG00000231437.3|OTTHUMG00000011992.2|OTTHUMT00000470314.1|LINC01750-202|LINC01750|3068	3.068	0	0	1	1	0	0	2	0.65189	0	0	0	0	0	0	0	0	0	0	0	0	0	0	0	0	0	0	0	0	0	0
ENST00000438816.2|ENSG00000228400.2|OTTHUMG00000153351.2|OTTHUMT00000330858.2|CNTNAP5-DT-201|CNTNAP5-DT|3154	3.154	1	0	1	0	0	0	2	0.634115	0	0	0	0	0	0	0	0	0	0	0	0	0	0	0	0	0	0	0	0	0	0
ENST00000438872.1|ENSG00000244380.1|OTTHUMG00000156589.2|OTTHUMT00000344705.2|ENST00000438872|ENSG00000244380|885	0.885	1	0	0	1	0	0	2	2.25989	0.146481	0.233634	0	0	0	0	0	0.0165742	0	0	0	0	0	0.0958696	0.107142	0.0760882	0	0	0	0	0	0.105128
ENST00000439412.6|ENSG00000228414.8|OTTHUMG00000152126.4|OTTHUMT00000325763.2|REL-DT-201|REL-DT|2620	2.62	0	0	0	0	1	1	2	0.763359	0	0.00384278	0	0	0	0	0	0	0	0	0.00421857	0	0	0	0	0	0	0	0	0	0.0537699	0
ENST00000439898.1|ENSG00000230454.1|OTTHUMG00000156937.1|OTTHUMT00000346668.1|ENST00000439898|ENSG00000230454|2625	2.625	0	0	0	2	0	0	2	0.761905	0	0.000357347	0.41356	0.566515	3.74e-09	0	0.0998249	0	0.239777	0.301806	0	0.0689204	0	0.0761366	4.5e-09	0.473214	1.68573	0.811334	0.643058	0.116013	1.23919	0.674585
ENST00000440197.2|ENSG00000236756.4|OTTHUMG00000018460.4|OTTHUMT00000048635.3|DNAJC9-AS1-204|DNAJC9-AS1|2865	2.865	0	0	0	0	0	2	2	0.69808	0.0017579	0.0590546	0.0103933	0	0	0	0	0.00549406	0	0	0	0	0.0276435	0.117631	0.0400892	0	0	0	0.286414	0.0676897	0	0
ENST00000440322.5|ENSG00000224490.5|OTTHUMG00000154082.1|OTTHUMT00000333766.1|TTC21B-AS1-201|TTC21B-AS1|2260	2.26	0	0	0	0	0	2	2	0.884956	0	0	0	0	0	0	0.0101456	0	0	0	0	0	0	0	0	0	0	0	0	0	0	0
ENST00000440406.2|ENSG00000224888.4|OTTHUMG00000156775.4|OTTHUMT00000345698.2|ENST00000440406|ENSG00000224888|1539	1.539	0	0	0	2	0	0	2	1.29955	0	0.0233446	0.0105457	0	0	0	0	0	0	0.0909531	0	0	0	0	0	0	0	0	0	0	0	0
ENST00000440496.5|ENSG00000223546.9|OTTHUMG00000022077.9|OTTHUMT00000057664.1|LINC00630-205|LINC00630|2101	2.101	1	0	0	0	0	1	2	0.951928	NA	NA	NA	NA	NA	NA	NA	NA	NA	NA	NA	NA	NA	NA	NA	NA	NA	NA	NA	NA	NA	NA
ENST00000440698.1|ENSG00000231918.1|OTTHUMG00000144189.3|OTTHUMT00000291399.3|ENST00000440698|ENSG00000231918|3939	3.939	0	0	0	0	0	2	2	0.507743	0	0	0	0	0	0	0	0	0	0	0	0	0	0	0	0	0	0	0	0	0	0
ENST00000440887.2|ENSG00000229414.2|OTTHUMG00000011704.2|OTTHUMT00000383080.1|KCNQ1-AS1-201|KCNQ1-AS1|1084	1.084	1	0	0	0	1	0	2	1.84502	0	0.0330417	0	0	0	0	0	0	0	0	0	0	0	0	0	0	0	0	0	0	0	0
ENST00000441052.1|ENSG00000235314.1|OTTHUMG00000155351.1|OTTHUMT00000339589.1|LINC00957-202|LINC00957|2590	2.59	0	0	1	1	0	0	2	0.772201	0.178019	0.199753	0.107677	0.0981109	0.240433	0.54121	0.271316	0.241042	0	0.0549082	0.118188	0	0	0.0328677	0.0738923	0.0481867	0.170087	0.15606	0.0286962	0.136623	0.0582268	0.070668
ENST00000441531.1|ENSG00000229589.1|OTTHUMG00000156031.1|OTTHUMT00000342775.1|ACVR2B-AS1-201|ACVR2B-AS1|2517	2.517	0	0	1	1	0	0	2	0.794597	0.0684069	0.0783375	0.0594417	0.158574	0.624254	0.198043	0.0649571	0	0.116796	0	0.0105631	0	0	0	0.33325	0.650967	0	0.359276	0.948729	0.2575	1.61422	1.2854
ENST00000441587.3|ENSG00000230002.3|OTTHUMG00000152785.3|OTTHUMT00000327862.3|ALMS1-IT1-201|ALMS1-IT1|2105	2.105	0	0	0	0	0	2	2	0.950119	1.17186	1.01904	0.791635	2.18099	15.1982	1.13126	0	0	3.09584	2.24882	3.72898	4.6632	6.56204	9.14926	0.530228	0.203495	3.71313	1.68232	0.279465	0.473704	0.808701	0.414683
ENST00000441716.2|ENSG00000235994.4|OTTHUMG00000016038.3|OTTHUMT00000043184.2|ENST00000441716|ENSG00000235994|757	0.757	0	0	0	2	0	0	2	2.64201	0	0	0	0	0	0	0	0	0	0	0	0	0	0	0	0	0	0	0	0	0	0
ENST00000442318.1|ENSG00000224717.1|OTTHUMG00000037202.1|OTTHUMT00000090406.1|LEMD1-DT-201|LEMD1-DT|2885	2.885	1	0	1	0	0	0	2	0.693241	0	0	0	0	0	0	0	0	0	0	0	0	0	0	0	0	0	0	0	0	0	0
ENST00000442815.1|ENSG00000237989.2|OTTHUMG00000086865.1|OTTHUMT00000195623.1|LINC01679-201|LINC01679|2798	2.798	0	0	1	1	0	0	2	0.714796	0.0142746	0	0	0	0	0	0	0	0	0	0	0	0	0	0.00847138	0	0	0	0	0	0	0
ENST00000442969.5|ENSG00000290660.1|-|OTTHUMT00000044167.2|ENST00000442969|ENSG00000290660|2796	2.796	0	1	0	0	1	0	2	0.715308	0.537518	0.635786	0.164204	0.279275	1.74565	0.505571	0.111805	0.0721742	0.859813	0.7289	0.734717	1.41648	1.90057	2.42539	0	0.0207736	0	0	0.0121504	0.0249751	0.0793437	0
ENST00000443224.1|ENSG00000224215.1|OTTHUMG00000017817.1|OTTHUMT00000047212.1|C10orf67-AS1-201|C10orf67-AS1|892	0.892	0	0	1	1	0	0	2	2.24215	0	0	0	0	0	0	0	0	0	0	0	0	0	0	0	0	0	0	0	0	0	0
ENST00000443246.2|ENSG00000235824.5|OTTHUMG00000017876.7|OTTHUMT00000047376.2|LINC00837-201|LINC00837|3991	3.991	0	0	0	0	0	2	2	0.501128	0.0295411	0	0.0618085	0.0306614	0.0989436	0.169817	0.0785315	0.0907472	0.421685	0.0671644	0.0900285	0	0.219274	0.0356105	0	0	0	0	0	0	0	0
ENST00000444431.1|ENSG00000151303.11|OTTHUMG00000018667.2|OTTHUMT00000049193.1|ENST00000444431|ENSG00000151303|4560	4.56	0	0	0	0	0	2	2	0.438596	0.0553395	0.0568058	0.0586368	0.0479452	0.720542	0.211319	0.030671	0.0027058	0	0	0.404331	1.0134	1.19022	1.62185	0	0	0	0	0	0	0	0
ENST00000445000.2|ENSG00000244041.7|OTTHUMG00000014128.5|OTTHUMT00000255317.2|LINC01011-201|LINC01011|2811	2.811	0	0	0	2	0	0	2	0.711491	0.086158	0	0.0315252	0	0	0.060794	0.194064	0.555691	0.170021	0	0	0	0.216302	0.223217	0	0	0	0	0	0	0	0
ENST00000445997.1|ENSG00000237339.5|OTTHUMG00000020912.1|OTTHUMT00000055006.1|LINC01502-201|LINC01502|2471	2.471	0	0	0	2	0	0	2	0.809389	0	0	0	0	0	0	0	0	0	0	0	0	0	0	0	0	0	0	0	0	0	0
ENST00000446136.1|ENSG00000230368.2|OTTHUMG00000002469.1|OTTHUMT00000007021.1|FAM41C-203|FAM41C|1807	1.807	0	0	0	1	0	1	2	1.10681	0	0	0.0199714	0.0638869	0.0714531	0.108653	0	0	0	0	0	0.0517465	0	0	0	0	0	0	0	0.0340186	0	0.0730384
ENST00000447565.1|ENSG00000232530.1|OTTHUMG00000150909.1|OTTHUMT00000320507.1|LIF-AS1-201|LIF-AS1|808	0.808	0	0	1	1	0	0	2	2.47525	0	0	0	0	0	0	0	0	0	0	0	0	0	0	0	0	0	0	0	0	0	0
ENST00000448407.1|ENSG00000232307.1|OTTHUMG00000041332.1|OTTHUMT00000099035.1|DAOA-AS1-201|DAOA-AS1|2482	2.482	1	0	0	0	0	1	2	0.805802	0	0	0	0	0	0	0	0	0	0	0	0	0	0	0	0	0	0	0	0	0	0
ENST00000448869.1|ENSG00000229953.1|OTTHUMG00000033321.1|OTTHUMT00000081838.1|BCAN-AS2-201|BCAN-AS2|758	0.758	0	0	1	1	0	0	2	2.63852	1.71067	1.68582	6.23918	5.6708	11.0641	37.5022	54.4107	174.508	14.8329	16.3399	5.04172	6.04083	4.90945	4.29692	2.98257	3.02771	14.2534	12.6839	11.5169	9.15763	10.3842	13.5564
ENST00000448901.1|ENSG00000227007.1|OTTHUMG00000151457.1|OTTHUMT00000322744.1|LINC01247-201|LINC01247|4209	4.209	0	0	0	0	0	2	2	0.475172	0	0	0	0	0	0	0	0	0	0	0	0.0247981	0.014771	0.0377726	0	0	0.0487847	0.0596696	0.0489737	0.0316239	0	0
ENST00000448963.5|ENSG00000232229.8|OTTHUMG00000018726.3|OTTHUMT00000049333.1|LINC00865-202|LINC00865|4272	4.272	1	0	0	0	0	1	2	0.468165	0.123145	0.0900938	0.0254721	0.016743	0	0.0156018	0.00503494	0.00648939	0.084442	0.311552	0.0602429	0.0407095	0.097567	0.185788	0	0	0	0	0.0542529	0.0436035	0.130342	0.0266078
ENST00000449248.1|ENSG00000235027.1|OTTHUMG00000045360.2|OTTHUMT00000105341.2|PRADX-201|PRADX|2015	2.015	0	0	1	1	0	0	2	0.992556	0	0.034812	0	0	0	0.0350768	0	0	0	0	0	0	0	0	0	0	0	0	0	0	0	0
ENST00000450750.1|ENSG00000236117.1|OTTHUMG00000150565.1|OTTHUMT00000318937.1|LINC01639-201|LINC01639|951	0.951	1	0	0	0	0	1	2	2.10305	0	0	0	0	0	0.085232	0	0	0	0	0	0	0	0	0.0692998	0.13936	0	0	0	0	0	0.0926815
ENST00000451298.1|ENSG00000217576.7|OTTHUMG00000185730.1|OTTHUMT00000471093.1|ENST00000451298|ENSG00000217576|3796	3.796	0	0	0	0	0	2	2	0.52687	1.89664	1.27894	0.400919	0.480978	13.6408	0.997891	0.524437	0.191559	0.586127	0	0.254638	0.518493	1.50934	1.25559	0	0	0	0	0	0	0	0
ENST00000451318.2|ENSG00000224992.2|OTTHUMG00000020846.2|OTTHUMT00000054805.2|ENST00000451318|ENSG00000224992|1019	1.019	1	0	0	1	0	0	2	1.96271	0	0	0	0	0.102825	0	0	0.0500992	0	0	0	0	0	0	0	0	0	0	0	0	0.101848	0
ENST00000451340.2|ENSG00000237009.2|OTTHUMG00000019461.1|OTTHUMT00000051555.1|GLIS3-AS1-201|GLIS3-AS1|734	0.734	0	0	1	1	0	0	2	2.7248	0	0	0	0	0	0	0	0	0	0	0	0	0	0	0	0	0	0	0	0	0	0
ENST00000451775.2|ENSG00000224738.2|OTTHUMG00000132079.1|OTTHUMT00000255106.1|ENST00000451775|ENSG00000224738|1524	1.524	0	0	1	1	0	0	2	1.31234	0.298556	0.286216	0.152496	0.0494321	0	0.977979	0.778212	0.559377	0	0	0.213375	0.206205	0.233088	0.128246	0.715726	1.35624	1.34957	0	0.429394	0.118642	0.307407	0.365496
ENST00000453174.7|ENSG00000283913.1|OTTHUMG00000191903.1|OTTHUMT00000491090.1|ENST00000453174|ENSG00000283913|1963	1.963	0	0	0	0	0	2	2	1.01885	0	0.00995003	0	0	0	0	0	0	0	0.0767094	0.0414324	0	0	0	0	0	0	0	0	0	0	0
ENST00000453229.1|ENSG00000235545.1|OTTHUMG00000009136.1|OTTHUMT00000025322.1|DOCK7-DT-201|DOCK7-DT|1228	1.228	0	0	1	0	0	1	2	1.62866	0.0665855	0.0464839	0.271889	0	1.12779	0.0483342	0.204643	0.09996	0	0	0.0367819	0.438697	0.162277	0	0.183736	0.772478	4.71901	1.29459	4.56908	3.44706	2.96017	3.39581
ENST00000453677.1|ENSG00000239569.5|OTTHUMG00000157280.1|OTTHUMT00000348305.1|KMT2E-AS1-201|KMT2E-AS1|736	0.736	0	0	1	1	0	0	2	2.71739	0	0	0	0	0	0.4259	0	0	0	0	0	0	0	0	0	0	0	0	0	0	0	0
ENST00000454482.2|ENSG00000230366.9|OTTHUMG00000086655.2|OTTHUMT00000194797.2|DSCR9-201|DSCR9|1644	1.644	0	0	1	1	0	0	2	1.21655	0.0921711	0.121172	0.3947	0.244453	0.295807	1.66867	0.0982292	0.191984	0	0	0.273893	0.797114	0.564594	0.141064	0.321655	0.348704	0	0	0.0713434	0.661511	0.492307	0.193783
ENST00000455647.2|ENSG00000290768.1|-|OTTHUMT00000052246.5|ENST00000455647|ENSG00000290768|3752	3.752	0	0	0	2	0	0	2	0.533049	0	0	0	0	0	0	0	0	0	0	0	0	0	0	0	0	0	0	0	0	0	0
ENST00000455931.2|ENSG00000226530.4|OTTHUMG00000021532.2|OTTHUMT00000056580.1|ENST00000455931|ENSG00000226530|1190	1.19	0	0	1	1	0	0	2	1.68067	NA	NA	NA	NA	NA	NA	NA	NA	NA	NA	NA	NA	NA	NA	NA	NA	NA	NA	NA	NA	NA	NA
ENST00000456328.2|ENSG00000290825.1|-|OTTHUMT00000362751.1|DDX11L2-202|DDX11L2|1657	1.657	0	0	1	1	0	0	2	1.207	0.0654954	0.141914	0.207359	0.206087	1.57356	1.35654	4.11e-09	0.0514732	0.599572	0.380585	0.051553	0	0	0.114644	0.124953	0	0.892556	0.546162	0.0502855	0.178498	0	0
ENST00000456585.5|ENSG00000229921.7|OTTHUMG00000016036.3|OTTHUMT00000043181.2|KIF25-AS1-202|KIF25-AS1|2795	2.795	0	0	1	1	0	0	2	0.715564	NA	NA	NA	NA	NA	NA	NA	NA	NA	NA	NA	NA	NA	NA	NA	NA	NA	NA	NA	NA	NA	NA
ENST00000457079.3|ENSG00000224652.4|OTTHUMG00000155713.9|OTTHUMT00000341345.2|LINC00885-201|LINC00885|1951	1.951	0	0	1	1	0	0	2	1.02512	NA	NA	NA	NA	NA	NA	NA	NA	NA	NA	NA	NA	NA	NA	NA	NA	NA	NA	NA	NA	NA	NA
ENST00000457113.1|ENSG00000227407.1|OTTHUMG00000065547.1|OTTHUMT00000140522.1|ENST00000457113|ENSG00000227407|529	0.529	0	0	1	1	0	0	2	3.78072	0	0.0208443	0	0	0	0	0	0	0	0	0	0	0	0	0	0	0	0	0	0	0.0304359	0
ENST00000457898.1|ENSG00000226029.1|OTTHUMG00000002314.1|OTTHUMT00000006685.1|LINC01772-201|LINC01772|3245	3.245	0	0	0	0	0	2	2	0.616333	0.0917621	0.179809	0.343769	0.0595871	3.77941	4.20205	0.142097	0.0346158	2.27488	2.15763	1.30211	0.450462	0.74248	0.941183	0.14824	0.17199	1.2308	1.19595	0.197904	0.481635	0.60584	1.16943
ENST00000458463.1|ENSG00000203527.2|OTTHUMG00000150677.1|OTTHUMT00000319580.1|SCUBE1-AS1-201|SCUBE1-AS1|1951	1.951	0	0	1	0	0	1	2	1.02512	0	0	0	0	0	0	0	0	0	0	0	0	0	0	0	0	0	0	0	0	0	0
ENST00000458633.1|ENSG00000233627.2|OTTHUMG00000137496.2|OTTHUMT00000268793.2|C4A-AS1-204|C4A-AS1|2095	2.095	0	0	0	2	0	0	2	0.954654	0	0	0.00616616	0	0	0	0	0	0	0	0	0	0	0	0	0	0	0	0	0	0	0
ENST00000460955.5|ENSG00000244198.7|OTTHUMG00000158007.3|OTTHUMT00000349987.1|ARHGEF35-AS1-201|ARHGEF35-AS1|569	0.569	0	0	1	1	0	0	2	3.51494	NA	NA	NA	NA	NA	NA	NA	NA	NA	NA	NA	NA	NA	NA	NA	NA	NA	NA	NA	NA	NA	NA
ENST00000462083.3|ENSG00000242048.3|OTTHUMG00000157325.3|OTTHUMT00000348457.3|PRKAG2-AS2-201|PRKAG2-AS2|2383	2.383	0	0	1	1	0	0	2	0.839278	0	0	0	0	0	0	0	0	0	0	0	0	0	0	0	0	0	0	0	0	0	0
ENST00000462773.6|ENSG00000290574.1|-|OTTHUMT00000252904.2|ENST00000462773|ENSG00000290574|1622	1.622	0	0	1	1	0	0	2	1.23305	0	0.0440675	0	0	0	0	0.0523636	0.0192882	0	0	0	0	0	0	0.713158	0.431582	0	0	0.0517623	0	0	0.0926603
ENST00000462792.2|ENSG00000239572.3|OTTHUMG00000159002.5|OTTHUMT00000499593.2|ENST00000462792|ENSG00000239572|4256	4.256	0	0	1	0	0	1	2	0.469925	0.164476	0.107722	0	0	0	0	0.00752029	0.014239	0	0	0.0801427	0	0.134955	0.0080289	0	0	0	0	0	0	0	0
ENST00000465549.1|ENSG00000241456.1|OTTHUMG00000157352.1|OTTHUMT00000348552.1|ENST00000465549|ENSG00000241456|564	0.564	0	0	0	1	1	0	2	3.5461	0	0	0	0	0	0	0	0	0	0	0	0	0	0	0	0	0	0	0	0	0	0
ENST00000468356.3|ENSG00000242686.4|OTTHUMG00000159908.4|OTTHUMT00000358106.4|PDE6B-AS1-201|PDE6B-AS1|2120	2.12	0	1	0	1	0	0	2	0.943396	0	0	0	0	0.138277	0	0	0	0	0	0	0	0	0	0	0	0	0	0	0	0	0
ENST00000472120.1|ENSG00000239205.1|OTTHUMG00000158073.1|OTTHUMT00000350128.1|LINC02023-201|LINC02023|1948	1.948	1	0	0	0	0	1	2	1.02669	0	0	0	0	0	0	0	0	0	0	0	0	0	0	0	0	0	0	0	0	0	0
ENST00000472240.1|ENSG00000268818.2|OTTHUMG00000187476.1|OTTHUMT00000475056.1|ENST00000472240|ENSG00000268818|852	0.852	0	0	1	1	0	0	2	2.34742	0	0	0	0	0	0	0	0	0	0	0	0	0	0	0	0	0	0	0	0	0	0
ENST00000475115.4|ENSG00000287115.2|OTTHUMG00000193812.1|OTTHUMT00000504976.1|LINC02993-201|LINC02993|553	0.553	0	0	1	1	0	0	2	3.61664	0.884544	1.67106	0	0.176862	0	0.521142	0.545255	0.787302	0	1.43	0	0	0.64824	0	0	0	0	0	0	0	0	0
ENST00000475197.1|ENSG00000231177.4|OTTHUMG00000155362.1|OTTHUMT00000339647.1|LINC00852-201|LINC00852|1328	1.328	0	0	0	0	1	1	2	1.50602	0.801577	0.656823	12.6761	17.5097	54.5504	49.4185	1.01258	0.369653	10.3101	5.19346	5.77121	2.83266	8.34441	4.35721	1.06538	0.928259	11.4255	7.58001	8.68802	10.1467	8.51757	7.09327
ENST00000476886.5|ENSG00000239265.5|OTTHUMG00000159846.2|OTTHUMT00000357695.2|CLRN1-AS1-202|CLRN1-AS1|2223	2.223	0	0	0	0	0	2	2	0.899685	0	0	0	0	0	0	0	0.0132106	0	0	0	0	0	0	0	0	0	0	0	0	0	0
ENST00000478806.1|ENSG00000284644.1|OTTHUMG00000192268.1|OTTHUMT00000493083.1|ENST00000478806|ENSG00000284644|573	0.573	0	0	1	1	0	0	2	3.4904	NA	NA	NA	NA	NA	NA	NA	NA	NA	NA	NA	NA	NA	NA	NA	NA	NA	NA	NA	NA	NA	NA
ENST00000483544.1|ENSG00000197503.4|OTTHUMG00000159485.1|OTTHUMT00000355725.1|LINC00477-201|LINC00477|1710	1.71	1	0	0	0	0	1	2	1.16959	0	0	0.0154559	0.00704902	0	0	0.063188	0.0181026	0	0.0757083	0	0	0.0388435	0	0	0	0	0	0	0	0	0
ENST00000488000.6|ENSG00000261606.5|OTTHUMG00000172966.2|OTTHUMT00000421539.1|ENST00000488000|ENSG00000261606|4565	4.565	0	0	1	1	0	0	2	0.438116	NA	NA	NA	NA	NA	NA	NA	NA	NA	NA	NA	NA	NA	NA	NA	NA	NA	NA	NA	NA	NA	NA
ENST00000489723.5|ENSG00000290455.1|-|OTTHUMT00000354295.2|ENST00000489723|ENSG00000290455|1254	1.254	0	0	1	1	0	0	2	1.5949	0	0	0	0	0	0	0	0	0	0	0	0	0.0646299	0	0	0	0	0	0	0	0	0
ENST00000490139.1|ENSG00000243795.1|OTTHUMG00000159355.1|OTTHUMT00000354629.1|LINC02044-201|LINC02044|2502	2.502	0	1	0	0	0	1	2	0.799361	0	0	0	0	0	0	0	0	0	0	0	0	0	0	0	0	0	0	0	0	0	0
ENST00000490162.3|ENSG00000228742.11|OTTHUMG00000157590.11|OTTHUMT00000500905.1|LINC02577-202|LINC02577|983	0.983	0	0	1	1	0	0	2	2.03459	0.319715	0.165225	0.300416	0.63845	0.414548	0.361376	2.16234	0.463279	0.641134	0.607634	1.04406	0.813614	2.61361	0.991489	0	0	0	0	0	0	0	0
ENST00000495287.1|ENSG00000244578.1|OTTHUMG00000159892.1|OTTHUMT00000358016.1|LINC01391-203|LINC01391|3538	3.538	0	0	1	1	0	0	2	0.565291	0	0	0.0148861	0.0151788	0	0.120714	0.0448479	0.176928	0	0	0	0	0	0	0	0	0	0	0	0	0	0
ENST00000495536.1|ENSG00000242407.1|OTTHUMG00000159903.1|OTTHUMT00000358091.1|ENST00000495536|ENSG00000242407|532	0.532	1	0	0	0	0	1	2	3.7594	0	0	0	0	0	0	0	0	0	0	0	0	0	0	0	0	0	0	0	0	0	0
ENST00000496220.1|ENSG00000241098.1|OTTHUMG00000158294.1|OTTHUMT00000350597.1|LINC01994-201|LINC01994|1808	1.808	0	0	0	0	0	2	2	1.10619	0	0	0	0	0	0	0	0	0	0	0	0	0	0	0	0	0	0	0	0	0	0
ENST00000497988.1|ENSG00000244738.1|OTTHUMG00000158859.1|OTTHUMT00000352445.1|ENST00000497988|ENSG00000244738|3097	3.097	0	0	0	0	0	2	2	0.645786	0.0102491	0.00884457	0.00217232	0.0372422	0.066031	0.00951963	0	0	0.0584786	0.00712351	0	0	0	0	0	0	0.133328	0.0365662	0.0171107	0	0	0
ENST00000498871.3|ENSG00000246763.7|OTTHUMG00000162743.5|OTTHUMT00000370290.2|RGMB-AS1-201|RGMB-AS1|1917	1.917	0	0	0	2	0	0	2	1.0433	0	0	0	0	0.0772614	0	0	0	0	0.111827	0	0.0599793	0	0	0.0206128	0.108574	0	0	0	0.00319305	0.543499	0.0216623
ENST00000498967.3|ENSG00000247373.3|OTTHUMG00000168693.2|OTTHUMT00000400605.2|TMED2-DT-201|TMED2-DT|8279	8.279	0	0	1	1	0	0	2	0.241575	0	0.0397633	0.031379	0	0	0	0	0	0	0	0	0	0.244062	0.091341	0	0	0	0	0.0693402	0.0257665	0.101262	0.0942506
ENST00000499481.2|ENSG00000245651.3|OTTHUMG00000170485.11|OTTHUMT00000409363.1|ENST00000499481|ENSG00000245651|3507	3.507	0	0	0	1	0	1	2	0.570288	0	0	0	0	0	0	0	0	0	0	0	0.0214104	0	0	0	0	0	0	0	0	0	0
ENST00000499525.1|ENSG00000246350.1|OTTHUMG00000166291.1|OTTHUMT00000388959.1|ZBED9-AS1-201|ZBED9-AS1|2874	2.874	0	0	0	1	0	1	2	0.695894	0.071823	0.143154	0.603963	1.22241	0.418193	0.361858	0	0.00499228	0.318697	0.340522	0	0.0367556	0	0.0101312	1.66278	0.00384776	0	2.88269	0.201942	0.0567555	0	0
ENST00000499579.1|ENSG00000248050.1|OTTHUMG00000165635.1|OTTHUMT00000385523.1|SYBU-AS1-201|SYBU-AS1|3075	3.075	1	0	0	0	0	1	2	0.650407	0	0.0111115	0.0570028	0	0	0	0	0	0.17675	0.495139	0.0241813	0	0	0.0269017	0	0	0	0	0.0699727	0.0359236	0.0473206	0.0192447
ENST00000499765.2|ENSG00000246308.4|OTTHUMG00000165807.2|OTTHUMT00000386304.2|ENST00000499765|ENSG00000246308|2428	2.428	0	0	0	0	0	2	2	0.823723	0	0	0.0481166	0	0	0	0.0708178	0	0	0	0.0375942	0	0	0.0468401	0	0	0	0	0.0142565	0.0742408	0.534068	0.534315
ENST00000500682.1|ENSG00000245648.2|OTTHUMG00000168533.8|OTTHUMT00000400338.1|KLRK1-AS1-201|KLRK1-AS1|2830	2.83	0	0	0	0	0	2	2	0.706714	0.30011	0.175296	0	0.0766827	0	0.166361	0.98948	0.14612	0	0.143107	0.321427	0.531307	0.356912	0.202938	0	0	0	0	0.0206056	0.094673	0.166475	0
ENST00000500929.2|ENSG00000245975.2|OTTHUMG00000171982.1|OTTHUMT00000416227.1|MINDY2-DT-201|MINDY2-DT|1396	1.396	0	1	0	0	0	1	2	1.43266	0.287287	0.454432	1.46419	1.78853	1.51601	1.66619	0.177361	0	0	0.431882	0	0	0.385026	0	0.545753	0.589866	1.0097	0.343484	0.161478	0.0155227	0	0
ENST00000501541.1|ENSG00000244953.1|OTTHUMG00000166556.1|OTTHUMT00000390398.1|ENST00000501541|ENSG00000244953|2045	2.045	0	0	1	1	0	0	2	0.977995	0	0	0	0	0	0	0	0	0.0573646	0.0577465	0	0	0	0	0	0	0	0	0	0	0	0
ENST00000501718.2|ENSG00000247011.3|OTTHUMG00000162317.1|OTTHUMT00000368558.1|ENST00000501718|ENSG00000247011|2054	2.054	0	1	0	1	0	0	2	0.97371	0.311659	0.302634	0.178328	0.109629	0.745083	1.42165	0.0464018	0.0307468	2.0735	2.01338	0.0972315	0.0805387	0.256458	0.254029	0.506967	0.246721	9.69477	5.02019	0.568424	0.432217	0.276722	0.146002
ENST00000502156.1|ENSG00000245719.1|OTTHUMG00000172251.1|OTTHUMT00000417506.1|ENST00000502156|ENSG00000245719|1986	1.986	0	0	1	1	0	0	2	1.00705	0	0	0	0	0	0	0	0	0	0	0	0	0	0	0.0562527	0	0	0	0.0396512	0	0	0
ENST00000502284.1|ENSG00000251143.1|OTTHUMG00000167782.1|OTTHUMT00000396243.1|ENST00000502284|ENSG00000251143|4233	4.233	0	0	0	0	0	2	2	0.472478	0.0463207	0.0318594	0	0	0.492433	0.209668	0.0101692	0.0327669	0.157814	0	0	0.0711473	0	0.0656806	0.0158372	0.0402938	0	0.185622	0.0496587	0	0.0953651	0.307812
ENST00000502515.1|ENSG00000249109.1|OTTHUMG00000163404.1|OTTHUMT00000373223.1|ENST00000502515|ENSG00000249109|1517	1.517	0	0	1	1	0	0	2	1.31839	0	0	0	0	0	0	0	0	0	0	0	0	0	0	0	0	0	0	0	0	0	0
ENST00000503244.2|ENSG00000251423.3|OTTHUMG00000161749.3|OTTHUMT00000365987.3|ENST00000503244|ENSG00000251423|3912	3.912	0	0	0	0	0	2	2	0.511247	0	0	0	0.00732575	0	0	0	0	0	0	0	0	0	0	0	0	0	0	0	0	0.0179762	0
ENST00000504583.2|ENSG00000250734.2|OTTHUMG00000150102.2|OTTHUMT00000316343.2|ENST00000504583|ENSG00000250734|535	0.535	0	0	1	1	0	0	2	3.73832	0	0	0	0	0	0	0	0	0	0	0	0	0	0	0	0	0	0	0	0.443733	0	0
ENST00000505632.1|ENSG00000250046.3|OTTHUMG00000161567.1|OTTHUMT00000365333.1|ENST00000505632|ENSG00000250046|740	0.74	0	1	0	0	0	1	2	2.7027	0	0	0	0	0	0	0	0	0	0	0	0	0	0	0	0	0	0	0	0	0	0
ENST00000505807.6|ENSG00000250208.7|OTTHUMG00000168379.2|OTTHUMT00000399504.2|FZD10-AS1-201|FZD10-AS1|10193	10.193	0	0	0	1	0	1	2	0.196213	0	0	0	0	0	0	0	0	0	0	0	0	0	0	0	0	0	0	0	0	0	0
ENST00000506090.5|ENSG00000249487.7|OTTHUMG00000171852.4|OTTHUMT00000415445.2|LINC01586-201|LINC01586|1840	1.84	0	0	0	1	0	1	2	1.08696	0	0	0	0	0.0726023	0	0	0	0	0	0	0	0	0	0.0148635	0	0	0	0	0	0	0
ENST00000506460.1|ENSG00000248408.1|OTTHUMG00000161747.1|OTTHUMT00000365982.1|LINC02469-201|LINC02469|741	0.741	0	0	1	0	1	0	2	2.69906	0	0	0	0	0	0	0	0	0	0	0	0	0	0	0	0	0	0	0	0	0	0
ENST00000506859.1|ENSG00000249996.1|OTTHUMG00000162982.1|OTTHUMT00000371253.1|PPIC-AS1-201|PPIC-AS1|561	0.561	0	0	1	1	0	0	2	3.56506	0.171328	0	0	0	0.0968607	0	0	0	0.558053	0	0	0	0.252781	0	0.252555	0.216105	0	0	1.39973	0	0	0
ENST00000506884.2|ENSG00000152931.9|OTTHUMG00000162213.5|OTTHUMT00000368802.2|PART1-202|PART1|3240	3.24	0	0	0	0	1	1	2	0.617284	0	0	0	0	0	0	0	0	0	0	0	0	0	0	0	0	0	0	0	0	0	0.0454538
ENST00000506895.1|ENSG00000249084.1|OTTHUMG00000160720.1|OTTHUMT00000361912.1|ENST00000506895|ENSG00000249084|753	0.753	0	0	0	0	1	1	2	2.65604	0	0	0	0	0.332151	0	0	0	0	0	0	0	0	0	0	0	0	0	0	0	0	0
ENST00000507313.6|ENSG00000249267.8|OTTHUMG00000168492.5|OTTHUMT00000399908.2|LINC00939-202|LINC00939|2877	2.877	0	1	0	0	0	1	2	0.695169	0	0	0	0.0331776	0.423294	0	0	0	0	0	0.00566285	0	0	0	0	0.0176753	0	0	0	0.0167677	0.00826745	0
ENST00000508452.1|ENSG00000251045.1|OTTHUMG00000163111.2|OTTHUMT00000371696.2|SLC25A48-AS1-201|SLC25A48-AS1|2141	2.141	0	0	1	0	1	0	2	0.934143	0	0	0	0	0	0	0	0	0	0	0	0	0	0	0	0	0	0	0	0	0	0
ENST00000510767.5|ENSG00000250033.5|OTTHUMG00000161284.2|OTTHUMT00000364382.1|SLC7A11-AS1-202|SLC7A11-AS1|4654	4.654	0	0	0	0	0	2	2	0.429738	0.0215916	0.0249881	0.00982469	0	0.214005	0	0.0114605	0.0142956	0.0859321	0.00910398	0.0758803	0	0.0397714	0	0.0102434	0	0.0474292	0	0.00131648	0.025184	0.0382959	0.00685893
ENST00000511627.1|ENSG00000253102.1|OTTHUMG00000162080.3|OTTHUMT00000367174.1|ENST00000511627|ENSG00000253102|715	0.715	0	0	1	1	0	0	2	2.7972	0	0.114029	0.268433	0.0651826	0	0.0386456	0	0.0592837	0	0	0	0	0	0.363011	0.128914	0.0996942	0	0	0	0	0.218094	0.160852
ENST00000511921.2|ENSG00000250274.2|OTTHUMG00000163119.1|OTTHUMT00000371723.1|ENST00000511921|ENSG00000250274|2272	2.272	0	0	0	1	1	0	2	0.880282	0.0178043	0	0.0225679	0.00978178	0.128186	0	0.0151268	0.0048026	0	0	0	0	0	0	0	0	0	0	0	0	0	0
ENST00000512642.3|ENSG00000248925.3|OTTHUMG00000161587.1|OTTHUMT00000365461.1|PDCD6-DT-201|PDCD6-DT|1085	1.085	0	0	1	0	0	1	2	1.84332	0.827611	0.539342	0	0.165209	0	0	0.907452	0.791334	0.222718	0	0.500355	0.191866	0.944945	0.765852	0	0	0	0	0.0399647	0.122152	0	0.0691734
ENST00000512675.1|ENSG00000248469.1|OTTHUMG00000163185.2|OTTHUMT00000371957.2|ENST00000512675|ENSG00000248469|1516	1.516	0	0	1	1	0	0	2	1.31926	0	0	0	0	0	0	0	0	0	0	0	0	0	0	0	0	0	0	0	0	0	0
ENST00000513690.3|ENSG00000250103.3|OTTHUMG00000161118.2|OTTHUMT00000363858.2|PANCR-202|PANCR|602	0.602	0	0	1	1	0	0	2	3.32226	NA	NA	NA	NA	NA	NA	NA	NA	NA	NA	NA	NA	NA	NA	NA	NA	NA	NA	NA	NA	NA	NA
ENST00000513886.1|ENSG00000290355.1|-|OTTHUMT00000420565.1|DDX11L16-202|DDX11L16|1652	1.652	0	0	1	1	0	0	2	1.21065	0.00724973	0.153759	0.380234	0.607655	2.75981	2.47368	0	0.103812	0	0	0	0.0726987	0	0	0.0314586	0	0	0	0	0.0597968	0	0
ENST00000513955.1|ENSG00000251487.1|OTTHUMG00000161783.1|OTTHUMT00000366085.1|ENST00000513955|ENSG00000251487|898	0.898	1	0	0	0	0	1	2	2.22717	0.0274392	0.150178	0.776923	1.50373	4.6386	1.19947	1.04022	0.516416	0	0	0	0	0.284716	0	0	0	0	0	0	0	0	0
ENST00000515213.1|ENSG00000249574.1|OTTHUMG00000160233.1|OTTHUMT00000359792.1|ENST00000515213|ENSG00000249574|2146	2.146	0	0	1	1	0	0	2	0.931966	0	0	0	0	0	0.0981214	0	0.00693827	0	0	0	0	0	0	0.0112613	0.110391	0.106815	0.0653457	0	0	0	0.0294514
ENST00000515343.1|ENSG00000251152.1|OTTHUMG00000160040.1|OTTHUMT00000358985.1|ENST00000515343|ENSG00000251152|4019	4.019	0	0	0	0	0	2	2	0.497636	0	0.00638451	0	0	0	0	0	0	0	0	0	0	0	0	0	0	0	0	0	0	0	0
ENST00000515614.3|ENSG00000249628.3|OTTHUMG00000168151.2|OTTHUMT00000398456.2|LINC00942-201|LINC00942|2210	2.21	0	0	1	1	0	0	2	0.904977	2.80901	2.47659	0.0563569	6.1e-05	1.08547	0.944926	1.20835	1.38652	0.117221	0.170379	0.412529	0.48858	0.273726	0.230416	0	0.0267331	0	0	0	0.0544183	0.14058	0.251496
ENST00000517384.1|ENSG00000254230.1|OTTHUMG00000163842.1|OTTHUMT00000375893.1|ENST00000517384|ENSG00000254230|585	0.585	0	0	1	1	0	0	2	3.4188	0	0	0	0	0	0	0	0	0	0	0	0	0	0	0	0	0	0	0	0	0	0
ENST00000518639.1|ENSG00000253106.1|OTTHUMG00000165069.1|OTTHUMT00000381671.1|ENST00000518639|ENSG00000253106|2355	2.355	0	0	0	0	0	2	2	0.849257	0.516702	0.14423	0.366297	0	2.7438	0.289913	0.000703649	0	8.6707	7.64147	2.11635	3.27421	2.13001	4.30721	0.382736	0.485082	5.52118	4.35265	1.8494	1.93851	3.32187	5.15834
ENST00000518739.1|ENSG00000253894.2|OTTHUMG00000164396.4|OTTHUMT00000378596.1|ENST00000518739|ENSG00000253894|3222	3.222	0	0	0	0	0	2	2	0.620732	0	0	0	0	0	0	0	0	0	0	0	0	0	0	0	0	0	0	0	0	0	0
ENST00000518880.1|ENSG00000254027.1|OTTHUMG00000164598.1|OTTHUMT00000379362.1|LNMICC-202|LNMICC|620	0.62	1	0	1	0	0	0	2	3.22581	0	0	0.10924	0	0	0.153521	0	0	0	0	0	0	0	0	0.108235	0.0698532	1.69654	0.308963	0	0.272269	0.325821	0
ENST00000520820.3|ENSG00000246263.4|OTTHUMG00000164878.2|OTTHUMT00000380742.2|UBR5-DT-202|UBR5-DT|2384	2.384	0	0	0	1	0	1	2	0.838926	0.474263	0.282335	0.0176256	0	1.24108	0.0476585	0.605831	0.829566	0.352471	0.257427	0.392707	0.669348	0.177872	0.468545	0.316568	0.295857	0.196992	0	0.659136	0.26746	0.61103	0.486729
ENST00000521025.1|ENSG00000253200.1|OTTHUMG00000163843.2|OTTHUMT00000375894.2|ENST00000521025|ENSG00000253200|2750	2.75	0	0	1	1	0	0	2	0.727273	0.726881	0.762324	0.816757	0.640821	5.78639	6.48416	0.235906	0.519031	2.41323	2.2014	1.62436	1.16091	1.86098	1.53135	0.465953	0.317154	2.85207	1.84143	1.14346	2.36815	0.997958	1.27019
ENST00000521292.2|ENSG00000253563.2|OTTHUMG00000163889.2|OTTHUMT00000376235.2|NKX2-1-AS1-201|NKX2-1-AS1|1775	1.775	0	0	1	1	0	0	2	1.12676	0	0	0	0	0	0	0	0	0	0	0	0	0	0	0	0	0	0	0	0	0	0
ENST00000522768.1|ENSG00000253944.1|OTTHUMG00000163705.1|OTTHUMT00000374850.1|MTUS1-DT-201|MTUS1-DT|510	0.51	0	0	1	1	0	0	2	3.92157	0	0	0	0	0	0	0	0	0	0	0	0	0	0	0.752637	0.281232	11.4414	2.4298	0	0	0	0.348534
ENST00000522817.3|ENSG00000253738.3|OTTHUMG00000164022.3|OTTHUMT00000376786.2|OTUD6B-AS1-201|OTUD6B-AS1|4935	4.935	0	0	0	0	0	2	2	0.405268	0.264362	0.167406	0.0106947	0.087827	0	0.106378	0.133503	0.111966	0.381159	0	0.707067	0.402207	0.98355	0.687655	0.150494	0.154014	0.108259	0.308037	0.18544	0.473264	0.449093	1.06982
ENST00000523871.1|ENSG00000254162.1|OTTHUMG00000164576.1|OTTHUMT00000379297.1|ENST00000523871|ENSG00000254162|3766	3.766	1	0	0	0	0	1	2	0.531067	0	0.00899657	0	0	0	0	0	0	0	0	0	0	0	0	0	0	0	0	0.0185068	0	0	0
ENST00000524295.5|ENSG00000254226.6|OTTHUMG00000163523.4|OTTHUMT00000373979.1|LINC01933-204|LINC01933|3591	3.591	0	0	0	0	0	2	2	0.556948	0.00994914	0.00172571	0.00567362	0	0	0.0248451	0.0390615	0.00778065	0	0	0.00312679	0	0	0	0.0513102	0	0	0	0.0732125	0	0.963475	0.362541
ENST00000525678.1|ENSG00000218109.6|OTTHUMG00000165805.2|OTTHUMT00000386284.2|KIRREL3-AS3-201|KIRREL3-AS3|1768	1.768	0	0	1	1	0	0	2	1.13122	0	0	0	0	0	0	0	0	0	0	0	0	0	0	0	0	0	0	0	0	0	0
ENST00000526036.1|ENSG00000254837.2|OTTHUMG00000150368.2|OTTHUMT00000317865.2|LIPT2-AS1-201|LIPT2-AS1|2493	2.493	0	0	1	1	0	0	2	0.802246	1.17163	1.20542	0.046381	0.0172643	0	0.0501277	0.41954	0.534928	0.0261106	0.219188	0	0.212934	0.793904	0.0865054	0.767313	1.1604	9.2e-09	0.69474	0.893712	0.631716	0.341248	0.272921
ENST00000527035.1|ENSG00000254545.1|OTTHUMG00000165113.1|OTTHUMT00000381911.1|ENST00000527035|ENSG00000254545|537	0.537	0	0	1	1	0	0	2	3.72439	0	0	0	0	0	0	0	0	0	0	0	0	0	0	0	0	0	0	0	0	0	0
ENST00000527067.1|ENSG00000255559.1|OTTHUMG00000165204.1|OTTHUMT00000382672.1|ZNF252P-AS1-201|ZNF252P-AS1|3236	3.236	0	0	0	1	0	1	2	0.618047	0.416569	0.410784	0.8407	1.20053	3.11121	2.15659	1.69956	0.692237	7.92727	10.7454	1.23155	1.7633	0.554422	2.00446	0.167041	0.07118	8.13334	4.41287	0.417731	0.358697	0.111519	0.163389
ENST00000527110.2|ENSG00000254575.2|OTTHUMG00000165500.2|OTTHUMT00000384493.2|ENST00000527110|ENSG00000254575|701	0.701	0	0	0	0	0	2	2	2.85307	0	0	0	0	0	0	0	0	0	0	0	0	0	0	0	0	0	0	0	0	0	0
ENST00000527209.1|ENSG00000204666.3|OTTHUMG00000165525.1|OTTHUMT00000384643.1|ZNF473CR-201|ZNF473CR|1525	1.525	1	0	1	0	0	0	2	1.31148	0	0	0.0058348	0	0.0151554	0	0.108616	0.00712833	0	0	0	0	0.104802	2.16e-09	0	0	0	0	0	0	0	0
ENST00000527285.1|ENSG00000254966.1|OTTHUMG00000166097.1|OTTHUMT00000387815.1|IGSF22-AS1-201|IGSF22-AS1|874	0.874	0	0	1	1	0	0	2	2.28833	0.0507879	0	0.0300896	0.0407419	0	0.0472507	0.0337316	0.17322	0	0	0	0	0	0	0	0	0	0	0	0	0	0
ENST00000527562.1|ENSG00000254488.1|OTTHUMG00000165821.1|OTTHUMT00000386379.1|ENST00000527562|ENSG00000254488|983	0.983	0	0	1	0	0	1	2	2.03459	0	0	0	0	0.11855	0	0.0142589	0	0	0	0	0	0	0	0	0	0	0	0	0	0	0
ENST00000528139.1|ENSG00000255366.1|OTTHUMG00000164145.2|OTTHUMT00000384713.1|ENST00000528139|ENSG00000255366|2491	2.491	0	0	0	0	0	2	2	0.80289	0	0	0	0	0	0	0	0	0	0	0	0	0	0	0	0	0	0	0	0	0	0
ENST00000529296.3|ENSG00000254531.3|OTTHUMG00000166283.1|OTTHUMT00000388907.1|FLJ20021-202|FLJ20021|1197	1.197	0	0	1	1	0	0	2	1.67084	NA	NA	NA	NA	NA	NA	NA	NA	NA	NA	NA	NA	NA	NA	NA	NA	NA	NA	NA	NA	NA	NA
ENST00000530201.2|ENSG00000251364.9|OTTHUMG00000165526.3|OTTHUMT00000525500.1|SYT9-AS1-207|SYT9-AS1|1868	1.868	0	0	1	1	0	0	2	1.07066	0.0809217	0.101729	0.0322325	0.0206138	0.00258501	0.232678	0.0210959	0.0383886	0.215013	0.0164466	0	0	0.10179	0	0.0545539	0.0600924	0.280578	0.0676712	4.06e-09	0	0.0810874	0.0705582
ENST00000530283.1|ENSG00000254980.1|OTTHUMG00000166719.1|OTTHUMT00000391180.1|ENST00000530283|ENSG00000254980|1155	1.155	1	0	0	1	0	0	2	1.7316	0	0	0	0	0	0	0	0	0	0	0	0	0	0	0	0	0	0	0	0	0.0861429	0
ENST00000530583.1|ENSG00000233220.3|OTTHUMG00000165763.1|OTTHUMT00000386085.1|PRDM10-DT-201|PRDM10-DT|1419	1.419	1	0	1	0	0	0	2	1.40944	0.237783	0.536369	0.649921	1.02935	1.6282	1.04648	0.0264339	0	7.10703	8.07452	0.254579	0.536163	0.108761	0.424501	0.614933	0.043627	8.27584	5.51529	0.06239	0	0	0.251742
ENST00000532191.2|ENSG00000285338.1|OTTHUMG00000192502.1|OTTHUMT00000494792.1|ENST00000532191|ENSG00000285338|1349	1.349	0	0	1	1	0	0	2	1.48258	2.39612	2.65146	0.839728	0.642187	0.99508	8.05416	10.5498	16.451	0.230854	0.19312	0	0.108303	0.361506	0.686839	2.92625	4.04531	0.205604	0	0.302153	0.590546	0.398023	0.944817
ENST00000533954.5|ENSG00000255240.6|OTTHUMG00000167434.3|OTTHUMT00000394603.2|ENST00000533954|ENSG00000255240|2810	2.81	0	0	0	2	0	0	2	0.711744	0.0116694	0	0	0	0	0	0	0	0	0	0	0.0593304	0	0	0	0	0	0	0	0	0	0
ENST00000535370.2|ENSG00000256810.2|OTTHUMG00000168349.2|OTTHUMT00000399381.2|ENST00000535370|ENSG00000256810|2028	2.028	0	0	2	0	0	0	2	0.986193	0	0	0	0	0	0	0	0	0	0	0	0	0	0	0	0	0	0	0	0	0	0
ENST00000535939.5|ENSG00000290537.1|-|OTTHUMT00000359306.2|ENST00000535939|ENSG00000290537|2353	2.353	0	0	0	0	0	2	2	0.849979	0.191646	0.262165	0.506677	0.622968	6.24422	0.0328769	0.514255	0.14063	0	0.223652	1.08962	0.61656	1.21758	1.90274	0.363907	0.279627	0	0.197858	3.515	3.22913	1.34748	1.12138
ENST00000536986.5|ENSG00000250685.7|OTTHUMG00000176733.1|OTTHUMT00000433393.1|ENST00000536986|ENSG00000250685|2689	2.689	0	0	1	1	0	0	2	0.743771	NA	NA	NA	NA	NA	NA	NA	NA	NA	NA	NA	NA	NA	NA	NA	NA	NA	NA	NA	NA	NA	NA
ENST00000537616.1|ENSG00000257027.1|OTTHUMG00000168442.1|OTTHUMT00000399756.1|ENST00000537616|ENSG00000257027|2508	2.508	0	0	0	0	0	2	2	0.797448	0.00309331	0.0610491	0.988232	0.462632	21.6438	2.73551	0.596851	0	3.05016	3.82484	2.1923	5.27498	2.07826	2.85596	0.108426	0.00396058	5.32957	2.67068	6.37386	5.79399	3.57805	3.55393
ENST00000537889.1|ENSG00000290391.1|-|OTTHUMT00000398420.1|ENST00000537889|ENSG00000290391|514	0.514	0	0	1	1	0	0	2	3.89105	0	0	0	0	0	0	0	0	0	0.188761	0	0	0	0	0	0	0	0	0	0	0	0
ENST00000538094.2|ENSG00000214851.5|OTTHUMG00000168288.1|OTTHUMT00000399174.1|LINC00612-201|LINC00612|2210	2.21	0	0	1	1	0	0	2	0.904977	0	0	0	0	0	0	0	0	0.0521609	0	0	0	0	0	0.0126252	0.0726862	0	0.534706	0.0114023	0	0.0451475	0.104835
ENST00000538407.2|ENSG00000256508.2|OTTHUMG00000172940.1|OTTHUMT00000421418.1|MRGPRF-AS1-201|MRGPRF-AS1|1490	1.49	0	0	0	1	1	0	2	1.34228	0	0	0	0	0	0	0	0	0	0	0	0	0	0	0	0	0	0	0	0	0	0
ENST00000539278.1|ENSG00000214248.2|OTTHUMG00000182572.2|OTTHUMT00000462471.2|ENST00000539278|ENSG00000214248|4739	4.739	1	0	0	1	0	0	2	0.42203	0.47814	0.411224	2.22075	2.05827	6.51365	9.64196	0.0991733	0.153968	4.27696	3.44899	0.119189	0.209486	0.0519026	0.265245	0.307263	0.071668	2.35453	1.36135	0.0858993	0.0275809	0.058111	0.0237478
ENST00000539813.1|ENSG00000256642.1|OTTHUMG00000176379.1|OTTHUMT00000431840.1|LINC00273-201|LINC00273|1452	1.452	0	0	2	0	0	0	2	1.37741	0	0	0	0	0	0	0	0	0	0	0	0	0	0	0	0	0	0	0	0	0	0
ENST00000542219.1|ENSG00000255970.1|OTTHUMG00000169091.1|OTTHUMT00000402224.1|LINC02421-201|LINC02421|3135	3.135	0	0	0	0	1	1	2	0.637959	0	0	0.0312909	0	0.0604686	0	0	0	0	0	0.0296102	0	0	0.0179981	0	0	0.0466005	0.0350051	0.0228068	0.0587178	0.0195144	0.0188233
ENST00000542466.2|ENSG00000255737.2|OTTHUMG00000170286.1|OTTHUMT00000408368.1|AGAP2-AS1-201|AGAP2-AS1|1500	1.5	0	0	1	1	0	0	2	1.33333	0	0	0	0	0	0	0	0	0	0	0	0	0	0	2.12677	2.21515	0.189809	0	0.671059	0.133845	1.42634	0.768924
ENST00000543008.2|ENSG00000205488.9|OTTHUMG00000168090.2|OTTHUMT00000398076.2|CALML3-AS1-202|CALML3-AS1|8739	8.739	0	0	0	0	0	2	2	0.228859	0	0.00757859	0	0.00399678	0	0	0.00594199	0	0.0100802	0	0	0	0.00676753	0	0.0256229	0.00637066	0	0.0528561	0.00576151	0.012686	0.0376787	0.0309106
ENST00000544842.1|ENSG00000256146.1|OTTHUMG00000168646.1|OTTHUMT00000400480.1|ENST00000544842|ENSG00000256146|3387	3.387	0	0	0	0	1	1	2	0.590493	0.110442	0	0.247384	0.710752	1.77948	0	0	0	0.681538	1.07652	0	0.0745775	0.063734	0.0523868	0	0	0	0	0	0	0	0
ENST00000545254.1|ENSG00000256633.1|OTTHUMG00000167928.2|OTTHUMT00000397127.1|PDE2A-AS2-201|PDE2A-AS2|664	0.664	0	0	1	1	0	0	2	3.01205	0	0	0	0	0	0	0	0	0	0	0.497318	0	0	0	0	0	0	0	0	0	0	0
ENST00000545709.1|ENSG00000250280.2|OTTHUMG00000168867.1|OTTHUMT00000401432.1|ENST00000545709|ENSG00000250280|3457	3.457	0	1	0	0	0	1	2	0.578536	0	0	0	0	0	0.0373981	0	0	0	0	1.51e-06	0.122192	0.112001	0.0967125	0	0	0	0.795086	0	0.124864	0.100715	0.10168
ENST00000547326.2|ENSG00000257497.2|OTTHUMG00000169758.2|OTTHUMT00000405726.2|GLIPR1-AS1-201|GLIPR1-AS1|1482	1.482	0	0	0	0	0	2	2	1.34953	0.094029	0.17706	0	0.172873	0	0.00803123	3.08689	1.1802	0	0	3.49511	1.14678	4.72222	1.38526	0.036002	0.441155	0	0	1.92635	2.39059	1.68126	4.46826
ENST00000547799.5|ENSG00000257433.8|OTTHUMG00000169669.6|OTTHUMT00000405347.1|RPAP3-DT-201|RPAP3-DT|3299	3.299	0	0	0	2	0	0	2	0.606244	0	0.0356306	0	0	0.047972	0.105972	0.00779017	0.0681709	0	0	0	0	0	0	0.0228752	0	0	0	0	0	0	0
ENST00000548231.1|ENSG00000258010.4|OTTHUMG00000169345.2|OTTHUMT00000403632.1|ENST00000548231|ENSG00000258010|1891	1.891	0	0	2	0	0	0	2	1.05764	0	0	0.00636636	0	0	0.0376594	0	0	0	0	0	0	0	0	0.0258525	0	0	0	0	0	0.0361923	0
ENST00000549278.2|ENSG00000246363.4|OTTHUMG00000169910.3|OTTHUMT00000498998.1|LINC02458-202|LINC02458|4177	4.177	0	0	0	0	0	2	2	0.478813	0.520248	0.662768	0	0.00261921	0	0	0.00236702	0	0	0	0	0	0	0	0.00452296	0	0	0	0	0	0	0.0263288
ENST00000549303.1|ENSG00000257180.1|OTTHUMG00000170520.1|OTTHUMT00000409508.1|ENST00000549303|ENSG00000257180|776	0.776	0	1	0	0	0	1	2	2.57732	0	0	0	0	0	0	0	0	0	0	0	0	0	0	0	0	0	0	0	0	0	0
ENST00000549950.5|ENSG00000290678.1|-|OTTHUMT00000409299.2|ENST00000549950|ENSG00000290678|1693	1.693	0	0	1	1	0	0	2	1.18133	0	0	0	0	0	0	0	0	0	0	0	0	0	0	0	0	0	0	0	0	0	0
ENST00000550135.5|ENSG00000176593.8|OTTHUMG00000169805.2|OTTHUMT00000405971.1|ENST00000550135|ENSG00000176593|6438	6.438	0	0	0	1	0	1	2	0.310655	0	0	0	0	0	0	0	0.00471474	0	0	0	0.0149356	0	0.00143718	0	0	0	0	0.0645956	0	0	0.072982
ENST00000550538.5|ENSG00000290692.1|-|OTTHUMT00000409340.6|ENST00000550538|ENSG00000290692|1693	1.693	0	0	1	1	0	0	2	1.18133	0	0	0	0	0	0	0	0	0	0	0	0	0	0	0	0	0	0	0	0	0	0.0397251
ENST00000551194.1|ENSG00000291295.1|OTTHUMG00000167140.8|OTTHUMT00000404378.1|ENST00000551194|ENSG00000291295|564	0.564	0	0	1	1	0	0	2	3.5461	0	0	0	0	0	0	0	0	0	0	0	0	0	0	0	0	0	0	0	0	0	0
ENST00000551271.5|ENSG00000251602.7|OTTHUMG00000170424.2|OTTHUMT00000409066.1|MTA1-DT-202|MTA1-DT|2279	2.279	0	0	1	1	0	0	2	0.877578	0	0.226004	0	0	0.194854	0.154612	0.197927	0.129912	0.193445	0	0	0	0.169888	0.0383164	1.40729	2.5646	0.225721	0.648651	0.343055	0.279669	0.197863	0.540147
ENST00000552378.2|ENSG00000257294.2|OTTHUMG00000169926.2|OTTHUMT00000406593.2|ENST00000552378|ENSG00000257294|989	0.989	0	0	0	0	0	2	2	2.02224	0	0	0	0	0	0	0	0	0	0	0	0	0	0	0	0	0	0	0	0	0	0
ENST00000552576.3|ENSG00000258056.3|OTTHUMG00000170187.2|OTTHUMT00000407841.2|CD63-AS1-201|CD63-AS1|1458	1.458	0	0	1	1	0	0	2	1.37174	3.2636	3.63062	0.334604	0.165752	0	0	0.798074	1.48068	0	0.485591	1.04311	2.63778	0.821605	1.34261	1.27651	1.80972	0	0.966628	1.03736	0.940786	0.294696	1.01855
ENST00000552806.1|ENSG00000257378.1|OTTHUMG00000170041.1|OTTHUMT00000406986.1|ENST00000552806|ENSG00000257378|560	0.56	0	0	1	1	0	0	2	3.57143	0	0	0	0	0	0	0	0	0	0	0	0	0	0	0	0	0	0	0	0	0	0
ENST00000553321.1|ENSG00000258384.1|OTTHUMG00000171683.1|OTTHUMT00000414747.1|RCCD1-AS1-201|RCCD1-AS1|1858	1.858	0	0	2	0	0	0	2	1.07643	0.0754409	0.103458	0	0	0	0	0	0	0	0.00680784	0	0.0624104	0	0	0.0395946	0.03246	0.148177	0.134783	0.129618	0	0.0437957	0
ENST00000554161.1|ENSG00000258572.1|OTTHUMG00000171637.1|OTTHUMT00000414554.1|ENST00000554161|ENSG00000258572|993	0.993	0	0	1	1	0	0	2	2.0141	0	0	0	0	0	0	0	0	0	0	0	0	0	0	0.225164	0.396815	1.12023	1.17115	0.54811	0.302858	0.11084	0.258536
ENST00000554614.2|ENSG00000258376.2|OTTHUMG00000171434.2|OTTHUMT00000413383.2|PAPLN-AS1-201|PAPLN-AS1|3050	3.05	0	0	1	1	0	0	2	0.655738	0.0523269	0.0336703	0.0164289	0	0.0933271	0.200768	0	0.0280516	0.0356825	0.0454348	0	0	0	0.0543117	0	0	0	0	0	0	0	0.0388517
ENST00000555043.1|ENSG00000258377.1|OTTHUMG00000170874.1|OTTHUMT00000410795.1|ENST00000555043|ENSG00000258377|2469	2.469	0	0	1	1	0	0	2	0.810045	0.0162952	0	0.113394	0.179966	0.526993	0	0	0	1.24e-08	1.45236	0.312786	0.263752	0.118782	0.261389	0	0	0	0.196209	0	0	0	0
ENST00000555187.1|ENSG00000258869.1|OTTHUMG00000171468.1|OTTHUMT00000413580.1|LINC02312-201|LINC02312|3046	3.046	0	0	0	0	0	2	2	0.656599	0	0	0	0	0	0	0	0	0	0	0	0	0	0	0	0	0	0	0	0	0	0
ENST00000556738.1|ENSG00000258768.2|OTTHUMG00000178843.1|OTTHUMT00000443563.1|ENST00000556738|ENSG00000258768|3829	3.829	0	0	0	0	0	2	2	0.52233	0.0396616	0	0	0	0	0	0.11914	0.0507966	0	0	0	0	0	0	0	0.0305781	0	0	0.189189	0.0519227	0.30696	0.166996
ENST00000556948.1|ENSG00000290326.1|-|OTTHUMT00000414853.1|ENST00000556948|ENSG00000290326|3036	3.036	0	0	0	0	0	2	2	0.658762	0.226235	0.111195	0.117046	0.108992	0.186172	0.071374	0	0.00948594	0.0801136	0	0.30681	0.462224	0.398766	0.488251	0	0.0245781	0.0705903	0	0.277408	0.265939	0.384225	0.331989
ENST00000558801.1|ENSG00000290690.1|-|OTTHUMT00000471721.1|ENST00000558801|ENSG00000290690|8752	8.752	0	0	0	0	0	2	2	0.228519	0.0505146	0.00671215	0.232485	0.236308	1.93059	2.67314	0.0100112	0.184436	0	0.208737	0.0675656	0.188047	0.0395833	0.160778	0.0445015	0	0	0	0.0222381	0	0.00857626	0.0225498
ENST00000559749.1|ENSG00000259213.1|OTTHUMG00000172628.1|OTTHUMT00000419536.1|ENST00000559749|ENSG00000259213|742	0.742	0	0	2	0	0	0	2	2.69542	0	0	0	0	0	0	0	0	0	0	0	0	0	0	0	0	0	0	0	0	0	0
ENST00000560066.1|ENSG00000291191.1|-|OTTHUMT00000417595.1|OR4F13P-202|OR4F13P|2054	2.054	0	0	0	0	0	2	2	0.97371	0	0	0	0	0	0	0	0	0	0	0	0	0	0	0	0	0	0	0	0	0	0
ENST00000560650.1|ENSG00000259462.3|OTTHUMG00000172386.3|OTTHUMT00000418253.1|CPEB1-AS1-201|CPEB1-AS1|2138	2.138	0	0	1	1	0	0	2	0.935454	0.279714	0.152543	0.000104282	0	0.182698	0.133087	0.0443924	0.0493711	0.178707	0.412774	0.110305	0	0.0796236	0.025084	0	0	0	0	0	0	0	0
ENST00000560994.3|ENSG00000256802.3|OTTHUMG00000172189.1|OTTHUMT00000417262.1|ENST00000560994|ENSG00000256802|984	0.984	0	0	1	1	0	0	2	2.03252	0.0537815	0.075686	0	0	0	0	0	0.0183621	0	0	0	0	0.058178	0	0.0379489	0.0396876	0.0141226	0	0.320302	0	0	0
ENST00000561083.1|ENSG00000259293.1|OTTHUMG00000171977.1|OTTHUMT00000416216.1|LIPC-AS1-201|LIPC-AS1|2231	2.231	0	0	1	0	1	0	2	0.896459	0	0	0	0	0	0	0	0	0	0	0	0	0	0	0	0	0	0	0	0	0	0
ENST00000561182.1|ENSG00000259530.1|OTTHUMG00000171938.1|OTTHUMT00000415993.1|ENST00000561182|ENSG00000259530|925	0.925	0	0	1	0	1	0	2	2.16216	0	0	0	0	0	0	0	0	0	0	0	0	0	0	0	0	0	0	0	0	0	0
ENST00000561403.6|ENSG00000291027.1|-|OTTHUMT00000499248.1|UBE2Q2P1-207|UBE2Q2P1|1631	1.631	0	1	0	1	0	0	2	1.22624	0.917858	0.817883	1.19553	0.701124	18.9829	8.39873	0.479692	0.463909	4.63963	4.93583	2.08737	1.92011	2.58842	2.65816	0.93229	0.215098	5.11226	2.56292	2.76501	2.86203	3.22977	3.29377
ENST00000561587.1|ENSG00000260683.1|OTTHUMG00000175443.1|OTTHUMT00000429989.1|ENST00000561587|ENSG00000260683|1900	1.9	0	0	0	0	0	2	2	1.05263	0	0.0185841	0.013741	0.0399867	0.388281	0.112402	0	0.0241217	1.76056	1.11856	0	0	0	0	0	0	0.497884	0.0761542	0.0839427	0	0.0850923	0
ENST00000561622.1|ENSG00000260772.1|OTTHUMG00000176834.1|OTTHUMT00000433979.1|ENST00000561622|ENSG00000260772|1588	1.588	0	0	0	0	0	2	2	1.25945	0.529686	0	0	1.99176	0	0	3.18093	0	0.896208	4.56543	12.8566	8.94575	18.5219	16.052	0.294878	6.13255	12.2652	14.5966	33.0607	40.886	13.4934	47.4824
ENST00000561847.2|ENSG00000260293.2|OTTHUMG00000177151.2|OTTHUMT00000435642.2|ENST00000561847|ENSG00000260293|5616	5.616	0	0	0	0	0	2	2	0.356125	0.143825	0.0646868	1.24427	1.68187	8.52005	7.60041	0.180737	0.209139	6.08392	4.40277	3.01756	3.82264	0.698766	1.94301	0.169904	0.281206	4.16334	1.51625	0.95874	0.899399	0.729739	0.364961
ENST00000561973.1|ENSG00000260118.1|OTTHUMG00000175555.2|OTTHUMT00000430475.1|ENST00000561973|ENSG00000260118|1432	1.432	0	0	0	0	0	2	2	1.39665	0	0	0	0	0	0	0	0.009866	0	0	0	0	0	0	0.0029269	0	0	0	0.259493	0.844732	0.0125595	0.271071
ENST00000562038.1|ENSG00000260804.3|OTTHUMG00000176293.1|OTTHUMT00000431729.1|LINC01963-201|LINC01963|3148	3.148	0	1	0	0	1	0	2	0.635324	0.882773	0.683013	0.548018	0.866517	1.30841	1.25073	0.507984	0.537357	5.19652	4.77681	7.74397	5.3932	3.73868	4.68735	3.46185	5.23963	8.53032	7.20494	6.03759	6.51089	5.45699	3.99044
ENST00000562166.1|ENSG00000261093.1|OTTHUMG00000177171.1|OTTHUMT00000435703.1|ENST00000562166|ENSG00000261093|1838	1.838	0	0	1	1	0	0	2	1.08814	0	0	0	0	0	0	0	0	0	0.0833034	0	0	0	0.0500919	0.0413341	0	0.129882	0.16529	0.17528	0.374556	0.0888338	0.178675
ENST00000562182.1|ENSG00000261020.1|OTTHUMG00000175987.1|OTTHUMT00000431349.1|ENST00000562182|ENSG00000261020|4710	4.71	0	0	0	0	1	1	2	0.424628	0.0580732	0.0499297	0.207907	0.338127	1.94187	0.521118	0.00226869	0.023392	0.637065	0.840026	0.29998	0.54833	0.300438	0.400546	0	0	0	0	0	0	0	0
ENST00000562189.1|ENSG00000290824.1|-|OTTHUMT00000417615.1|DDX11L16-206|DDX11L16|1652	1.652	0	0	1	1	0	0	2	1.21065	1.1e-05	0	0	1.35e-09	0	0	0.0576915	0.000506147	0	0	0	0	0	0	0	0	0	0	0	0	0	0
ENST00000562672.2|ENSG00000260369.2|OTTHUMG00000176094.2|OTTHUMT00000431496.2|ENST00000562672|ENSG00000260369|995	0.995	0	0	1	1	0	0	2	2.01005	0.356361	0.650497	1.8677	3.01675	4.63845	6.92073	0.44865	0.470134	14.296	8.12653	0.218654	0.613178	0.0917844	0.364271	0.914644	0.461832	9.84528	4.474	0.764636	0.603678	0	0.687134
ENST00000562917.1|ENSG00000261670.1|OTTHUMG00000173365.2|OTTHUMT00000422903.1|ENST00000562917|ENSG00000261670|4597	4.597	0	0	0	0	0	2	2	0.435066	0	0	0.0266547	0.0542804	0	0.0144702	0.00931217	0	0	0	0.893387	0.931284	0.362135	0.497035	0	0.0123284	0.177048	0.0541365	0.236895	0.199599	0.0751129	0.159577
ENST00000562992.1|ENSG00000260693.1|OTTHUMG00000175650.1|OTTHUMT00000430714.1|ENST00000562992|ENSG00000260693|701	0.701	0	0	0	0	1	1	2	2.85307	0	0	0	0.0592284	0	0	0	0	0	0	0	0	0	0	0	0	0	0	0	0	0	0
ENST00000563044.2|ENSG00000260978.2|OTTHUMG00000176418.1|OTTHUMT00000431943.1|ENST00000563044|ENSG00000260978|2565	2.565	1	0	0	0	0	1	2	0.779727	0.14084	0.107616	0.0890269	0.18708	0.168566	0.0537912	0.0703413	0.0510021	3.31688	4.83177	0.149444	0.118332	0	0.199486	0.0185885	0	0.688246	0.473618	0.0288966	0	0.0586135	0
ENST00000563554.1|ENSG00000261476.1|OTTHUMG00000177068.1|OTTHUMT00000435197.1|ENST00000563554|ENSG00000261476|852	0.852	0	0	0	0	1	1	2	2.34742	0.140223	0	0.660752	3.00477	3.18745	1.36519	0	0	8.8198	4.86275	0.529996	0.768569	0.256792	0.514315	0.259863	0	1.8027	5.12429	0	0.0570272	0.346102	0.745531
ENST00000563624.1|ENSG00000261168.1|OTTHUMG00000176093.1|OTTHUMT00000431495.1|ENST00000563624|ENSG00000261168|1536	1.536	0	0	1	1	0	0	2	1.30208	0	0.0233949	0.331622	0.507997	1.685	2.09959	0.0879101	0	0.828671	0.420554	0.11413	0.160276	0.0488834	0.126888	0	0.0398976	1.31815	1.41166	0.446306	0.105368	0.452182	0.316318
ENST00000563727.1|ENSG00000248540.3|OTTHUMG00000173053.2|OTTHUMT00000421953.1|ENST00000563727|ENSG00000248540|2924	2.924	0	0	1	1	0	0	2	0.683995	NA	NA	NA	NA	NA	NA	NA	NA	NA	NA	NA	NA	NA	NA	NA	NA	NA	NA	NA	NA	NA	NA
ENST00000563962.6|ENSG00000260448.7|OTTHUMG00000177185.2|OTTHUMT00000435758.2|LCMT1-AS1-202|LCMT1-AS1|1991	1.991	0	0	0	1	0	1	2	1.00452	0.0711637	0.188389	0.175621	0.247374	0.958518	0.720745	0.826279	0.729402	0.54148	0.342496	0.152593	0.322165	0.521888	0.250922	0	0	0	0	0.00136797	0	0.0801382	0
ENST00000564055.1|ENSG00000259780.3|OTTHUMG00000177085.1|OTTHUMT00000435235.1|ENST00000564055|ENSG00000259780|1225	1.225	0	0	1	1	0	0	2	1.63265	0.140243	0.240995	0.476661	0.462544	2.57752	8.16054	0.0636952	0.396973	0.113771	0.144011	0.7082	1.21478	0.133688	0.524689	0.105287	0.206516	0.455551	0.836642	0.388101	0.507867	0.235732	0.496863
ENST00000564074.1|ENSG00000260198.1|OTTHUMG00000176970.1|OTTHUMT00000434534.1|ENST00000564074|ENSG00000260198|1777	1.777	0	0	1	1	0	0	2	1.12549	0	0	0	0	0	0	0	0	0	0	0	0	0	0	0	0	0	0	0	0	0	0
ENST00000564458.1|ENSG00000290984.1|-|OTTHUMT00000432373.1|ENST00000564458|ENSG00000290984|1164	1.164	0	0	0	0	1	1	2	1.71821	0	0	0	0	0	0	0.0353054	0.0226035	0	0.100025	0	0	0	0	0	0	0	0	0	0	0	0
ENST00000564549.1|ENSG00000261033.1|OTTHUMG00000175977.2|OTTHUMT00000431339.2|SPECC1-DT-201|SPECC1-DT|1184	1.184	0	0	1	1	0	0	2	1.68919	0.145776	0.0939355	0.0472686	0.206418	0.402562	0.064908	0.0332885	0.114467	0.239307	0.302781	0.0828265	0	0.491728	0.184078	0.0219056	0.0537111	0	0	0	0.0763481	0	0
ENST00000564834.1|ENSG00000261455.1|OTTHUMG00000173415.1|OTTHUMT00000423022.1|LINC01003-201|LINC01003|1764	1.764	2	0	0	0	0	0	2	1.13379	8.06955	7.7194	5.46278	7.92723	22.5482	15.8443	13.8022	19.1716	24.6707	20.0115	2.61229	4.00314	6.49335	6.39067	1.6884	1.67582	8.76729	5.78351	3.46884	2.89579	4.40644	7.23183
ENST00000564841.1|ENSG00000260738.1|OTTHUMG00000176067.1|OTTHUMT00000431449.1|LINC00554-201|LINC00554|3011	3.011	0	0	1	1	0	0	2	0.664231	0	0	0	0	0	0	0	0	0	0	0	0	0	0	0	0	0	0	0	0	0	0
ENST00000564950.5|ENSG00000260280.5|OTTHUMG00000176758.2|OTTHUMT00000475165.1|SLX1B-SULT1A4-203|SLX1B-SULT1A4|2225	2.225	1	0	1	0	0	0	2	0.898876	NA	NA	NA	NA	NA	NA	NA	NA	NA	NA	NA	NA	NA	NA	NA	NA	NA	NA	NA	NA	NA	NA
ENST00000564956.1|ENSG00000261269.1|OTTHUMG00000173465.1|OTTHUMT00000423207.1|ENST00000564956|ENSG00000261269|2485	2.485	0	0	0	0	1	1	2	0.804829	0	0	0	0	0	0	0	0	0	0	0	0	0	0	0	0	0	0	0	0	0	0
ENST00000565053.1|ENSG00000259881.1|OTTHUMG00000175521.1|OTTHUMT00000430362.1|ENST00000565053|ENSG00000259881|2566	2.566	0	0	0	2	0	0	2	0.779423	0.0156424	0	0.0197754	0	0	0	0.00439441	0	0	0	0	0	0	0	0	0	0	0	0	0	0	0
ENST00000565058.2|ENSG00000260711.2|OTTHUMG00000172989.2|OTTHUMT00000421598.2|ENST00000565058|ENSG00000260711|6943	6.943	0	0	0	0	0	2	2	0.28806	0.53871	0.251798	0.10067	0.17233	0.53177	0.0742332	0.0299589	0.00126557	0.446285	0.39994	0.682504	0.312994	0.329489	0.397336	0.00606983	0	0.0137289	0	0.00604578	0	0.00805071	0
ENST00000565137.1|ENSG00000260740.2|OTTHUMG00000132464.3|OTTHUMT00000432893.1|ENST00000565137|ENSG00000260740|578	0.578	0	0	1	1	0	0	2	3.46021	0	0	0	0	0	0	0	0	0	0	0	0	0	0	0	0	0	0	0	0.680149	0	0
ENST00000565399.1|ENSG00000259828.1|OTTHUMG00000175944.1|OTTHUMT00000431299.1|ENST00000565399|ENSG00000259828|3996	3.996	0	0	0	0	0	2	2	0.500501	0	0	0	0	0	0	0	0	0	0	0	0	0	0	0	0	0	0	0	0	0	0
ENST00000565521.1|ENSG00000260774.1|OTTHUMG00000161585.1|OTTHUMT00000365458.1|ENST00000565521|ENSG00000260774|2881	2.881	1	0	0	0	0	1	2	0.694203	0.0567969	0.0767683	0.6407	0.896084	6.93748	0.36952	0.374756	0.0209806	0	0	0.14804	0	0	0	0.00112733	0.0677368	0	0	0	0.16393	0	0
ENST00000565797.3|ENSG00000261526.3|OTTHUMG00000175708.2|OTTHUMT00000430887.2|ENST00000565797|ENSG00000261526|1689	1.689	1	0	0	0	0	1	2	1.18413	5.98434	6.8083	9.5915	8.78021	33.1104	35.5174	23.6633	21.229	54.9702	42.9726	13.5726	17.8639	17.8749	15.8185	3.67492	4.48576	25.6708	16.1515	11.9577	13.1395	3.9732	9.76272
ENST00000565811.1|ENSG00000261520.5|OTTHUMG00000176106.1|OTTHUMT00000431514.1|DLGAP1-AS5-202|DLGAP1-AS5|2594	2.594	0	0	0	0	0	2	2	0.77101	0	0	0.00987556	0.0130618	0	0	0	0	0	0	0	0.0317905	0	0	0	0	0.254663	0.0438947	0	0.0272749	0	0
ENST00000565959.1|ENSG00000261610.1|OTTHUMG00000172750.1|OTTHUMT00000420359.1|ENST00000565959|ENSG00000261610|1782	1.782	0	0	0	0	0	2	2	1.12233	0.0462657	0.0795268	0.221353	0.107364	0.67048	0.120797	0.120521	0.0258537	1.15959	2.94576	0.937512	1.77791	0.645038	1.51166	0.0413947	0.0676383	1.08152	0.909888	0.730165	0.21652	0.462539	0.52048
ENST00000566036.1|ENSG00000260235.1|OTTHUMG00000172791.1|OTTHUMT00000420496.1|ENST00000566036|ENSG00000260235|560	0.56	0	0	1	1	0	0	2	3.57143	0	0	0	0	0	0	0	0	0	0.68663	0	0	0	0	0	0	0	0	0	0	0	0
ENST00000566170.2|ENSG00000261071.2|OTTHUMG00000175899.1|OTTHUMT00000431251.1|ENST00000566170|ENSG00000261071|1090	1.09	1	0	0	0	0	1	2	1.83486	0.8815	0.722874	1.54006	1.78599	3.11197	5.38626	2.03038	2.73012	30.95	24.016	8.85298	8.19118	9.30481	6.06869	2.19626	2.01222	48.8866	34.6178	12.5295	9.02242	17.1227	10.1601
ENST00000566287.1|ENSG00000261641.2|OTTHUMG00000176553.1|OTTHUMT00000432521.1|ENST00000566287|ENSG00000261641|1124	1.124	0	0	0	2	0	0	2	1.77936	0	0.0332285	0	0.0366151	0	0	0	0	0	0	0	0	0	0	0	0	0	0	0	0	0	0
ENST00000566293.1|ENSG00000260412.1|OTTHUMG00000175585.1|OTTHUMT00000430554.1|ENST00000566293|ENSG00000260412|6881	6.881	0	0	0	0	0	2	2	0.290655	0	0	0	0	0	0	0	0	0	0	0	0	0	0	0	0	0	0	0	0	0	0
ENST00000566366.1|ENSG00000261798.1|OTTHUMG00000175804.1|OTTHUMT00000431109.1|ENST00000566366|ENSG00000261798|1196	1.196	1	0	0	1	0	0	2	1.67224	0.612476	0.464321	1.23768	1.12174	3.44729	3.46251	0.876092	1.42625	5.0684	8.35261	0.489427	0.45788	0.346078	0.271939	0.0216504	0	1.41719	1.01222	0	0	0.0815444	0
ENST00000566457.1|ENSG00000261026.1|OTTHUMG00000173366.1|OTTHUMT00000422904.1|ENST00000566457|ENSG00000261026|4997	4.997	0	0	0	1	0	1	2	0.40024	0	0	0.0390988	0.0781953	0.166598	0.304529	0	0	0.0617968	0.0787765	0.0281234	0	0.0245016	0.0625871	0	0	0.0404009	0	0	0	0	0
ENST00000566529.1|ENSG00000261146.1|OTTHUMG00000175811.1|OTTHUMT00000431116.1|ENST00000566529|ENSG00000261146|4706	4.706	0	0	0	0	0	2	2	0.424989	0	0	0.145664	0.272406	0.502437	0.352419	0	0	0.747596	0.448429	0.120103	0.0844369	0.0784476	0.0501148	0	0	0	0	0	0	0	0
ENST00000566747.1|ENSG00000261578.1|OTTHUMG00000165240.1|OTTHUMT00000382875.1|ENST00000566747|ENSG00000261578|4192	4.192	0	0	1	0	0	1	2	0.477099	0.159086	0.0643641	0.798377	1.18691	3.56848	2.76921	0.426441	0.211905	1.39785	1.24058	1.07416	1.3904	1.18695	1.91608	0.348893	0.203521	1.42112	1.34861	0.754324	1.76735	0.332779	1.24974
ENST00000566840.1|ENSG00000260476.1|OTTHUMG00000175723.1|OTTHUMT00000430902.1|ENST00000566840|ENSG00000260476|1248	1.248	0	0	0	2	0	0	2	1.60256	0	0	0	0	0	0	0	0	0	0	0	0	0	0	0	0	0	0	0.150874	0.0705838	0	0
ENST00000566847.2|ENSG00000260475.2|OTTHUMG00000176194.1|OTTHUMT00000431617.1|SLC25A28-DT-201|SLC25A28-DT|1075	1.075	1	0	0	0	0	1	2	1.86047	0.447857	0.524656	0.451266	0.579668	0.452096	1.09587	0.277494	0.13013	5.68764	2.80425	0	0.135062	0.324965	0.427873	0.515195	0.180483	4.74785	2.05228	0.287038	0.443414	0.677555	0.227388
ENST00000566974.1|ENSG00000261054.1|OTTHUMG00000177237.1|OTTHUMT00000435962.1|SYNM-AS2-201|SYNM-AS2|2562	2.562	1	0	0	0	0	1	2	0.78064	0	0	0.00990439	0	0.0562598	0	0	0	0	0	0.0299304	0	0.025913	0	0.0204649	0	0	0	0	0	0	0.20828
ENST00000567093.1|ENSG00000260417.1|OTTHUMG00000176284.1|OTTHUMT00000431720.1|ENST00000567093|ENSG00000260417|3455	3.455	0	0	0	1	0	1	2	0.578871	0	0	4.66206	6.47801	58.685	58.8617	0.0680455	0.0119622	11.0065	9.27913	4.22019	8.13292	2.60812	4.86585	0.0056236	0	1.14335	1.15593	0.636529	0.123166	0.00370456	0
ENST00000567122.1|ENSG00000261396.1|OTTHUMG00000172863.1|OTTHUMT00000420959.1|ENST00000567122|ENSG00000261396|530	0.53	0	0	1	1	0	0	2	3.77358	0	0	0	0	0	0	0	0	0	0	0	0	0	0	0	0	0	0	0	0	0	0
ENST00000567381.1|ENSG00000261439.1|OTTHUMG00000176968.1|OTTHUMT00000434532.1|GNAO1-AS1-201|GNAO1-AS1|1905	1.905	0	0	2	0	0	0	2	1.04987	0	0.0184932	0	0	0	0	0	0	0	0	0	0	0	0	0	0	0	0	0	0	0	0
ENST00000567415.1|ENSG00000261229.6|OTTHUMG00000176724.1|OTTHUMT00000433308.1|ENST00000567415|ENSG00000261229|758	0.758	0	0	0	0	0	2	2	2.63852	0	0	1.24668	1.16523	0	2.84749	0	0	0	0.310759	0	0	0	0	0	0	0	0	0	0	0	0
ENST00000567544.1|ENSG00000260259.1|OTTHUMG00000173427.1|OTTHUMT00000423075.1|LINC02166-201|LINC02166|721	0.721	0	0	1	1	0	0	2	2.77393	0	0	0	0.0587749	0	0	0	0	0	0	0.163907	0	0.165201	0	0.188962	0.0928225	0	0	0.212104	0	0	0
ENST00000567613.2|ENSG00000260634.2|OTTHUMG00000176160.1|OTTHUMT00000431580.1|ENST00000567613|ENSG00000260634|2290	2.29	0	0	0	1	0	1	2	0.873362	0	0	0	0	0	0	0	0	0	0	0	0	0	0	0	0	0	0	0	0	0	0
ENST00000567788.1|ENSG00000214039.9|OTTHUMG00000168373.3|OTTHUMT00000399498.1|LINC02418-202|LINC02418|4592	4.592	0	0	0	0	0	2	2	0.43554	0	0	0	0	0	0	0	0	0	0	0	0	0	0	0.0222302	0	0.0837941	0	0.0126734	0	0	0
ENST00000568093.3|ENSG00000260648.3|OTTHUMG00000176889.3|OTTHUMT00000434230.3|ENST00000568093|ENSG00000260648|4028	4.028	0	0	0	2	0	0	2	0.496524	0.00016314	0.0176233	0.447015	0.558764	0	1.76125	0	0	0.117903	0	0.249714	0.15262	0.141406	0	0	0	0	0	0.144298	0.148047	0.0285724	0
ENST00000568457.1|ENSG00000260997.1|OTTHUMG00000173373.1|OTTHUMT00000422923.1|ENST00000568457|ENSG00000260997|1911	1.911	0	0	1	1	0	0	2	1.04657	0	0	0.0409524	0.238348	0.232592	0.0744349	0	0	0.249688	0	0.0428623	0	0	0.047667	0	0	0	0.0755951	0.0416596	0	0.0422306	0
ENST00000568500.1|ENSG00000261840.5|OTTHUMG00000176915.3|OTTHUMT00000434317.1|ENST00000568500|ENSG00000261840|1142	1.142	1	0	1	0	0	0	2	1.75131	0	0.000836583	0	0	0	0	0	0	0	0	0	0	0	0	0	0	0	0	0	0	0	0
ENST00000568593.2|ENSG00000260236.2|OTTHUMG00000175709.1|OTTHUMT00000430888.1|PTPN23-DT-201|PTPN23-DT|2431	2.431	0	1	0	1	0	0	2	0.822707	0.911134	0.754727	0.576584	0.930348	2.02461	1.36877	0.424964	0.433416	9.39502	6.27233	1.56139	2.68693	1.29565	1.13423	0.846597	0.434217	13.394	8.08101	1.47993	1.53214	1.06309	1.7731
ENST00000568767.1|ENSG00000260695.1|OTTHUMG00000173313.1|OTTHUMT00000422728.1|ENST00000568767|ENSG00000260695|2673	2.673	0	0	0	0	0	2	2	0.748223	0	0	0	0	0	0	0	0	0	0	0	0	0	0	0	0	0	0	0	0	0	0
ENST00000568976.2|ENSG00000259869.2|OTTHUMG00000176167.2|OTTHUMT00000431590.2|ENST00000568976|ENSG00000259869|3120	3.12	0	0	1	1	0	0	2	0.641026	0.0127297	0.0218869	0.0160364	0	0	0	0.0108401	0	0	0	0	0	0	0	0	0	0	0	0	0	0	0.0189269
ENST00000569111.1|ENSG00000261298.1|OTTHUMG00000176300.1|OTTHUMT00000431737.1|ENST00000569111|ENSG00000261298|1201	1.201	0	0	0	0	0	2	2	1.66528	0	0	0	0	0	0	0	0	0	0	0	0	0	0	0	0	0	0	0	0	0	0
ENST00000569134.1|ENSG00000260317.1|OTTHUMG00000174444.1|OTTHUMT00000426635.1|LINC02986-201|LINC02986|1805	1.805	0	0	0	0	0	2	2	1.10803	0.114062	0.156851	0.0727337	0.232834	0.4957	0.079372	0	0	2.54986	1.96047	1.52149	2.97936	1.90391	2.92244	0.312906	0.63354	3.4569	2.52187	3.99359	6.21887	1.68281	4.16909
ENST00000569214.1|ENSG00000260806.1|OTTHUMG00000171440.1|OTTHUMT00000413410.1|PAPOLA-DT-201|PAPOLA-DT|1512	1.512	0	0	1	1	0	0	2	1.32275	1.77287	1.59495	1.13732	1.34479	2.92655	3.45028	2.24864	2.20585	8.46413	10.5228	1.16603	1.55555	0.998369	2.07414	1.85546	1.62439	11.112	4.63654	1.42565	1.34554	1.03994	0.969333
ENST00000569285.1|ENSG00000261693.1|OTTHUMG00000164869.1|OTTHUMT00000380686.1|ENST00000569285|ENSG00000261693|3377	3.377	0	0	1	1	0	0	2	0.592242	0	0.120883	0.0516013	0.0965083	0.12563	0.680222	0.00324448	0.0125457	0.254198	0.323768	0.0434494	0.0305404	0.0188697	0.0725098	0.0694372	0.0340266	0.437308	0.191044	0	0	0	0
ENST00000569460.1|ENSG00000260585.1|OTTHUMG00000176478.1|OTTHUMT00000432179.1|ENST00000569460|ENSG00000260585|4997	4.997	0	0	0	0	0	2	2	0.40024	0.702492	0.597279	1.46132	2.93588	18.6034	2.22439	0.0127843	0	3.00744	2.75718	3.88103	4.36967	3.52823	3.97428	0	0	0.0404009	0	0.0135077	0.0130164	0.0411223	0
ENST00000569854.1|ENSG00000259831.1|OTTHUMG00000176071.1|OTTHUMT00000431454.1|LINC00567-201|LINC00567|3409	3.409	0	0	0	0	0	2	2	0.586682	0	0	0.00729834	0	0	0	0	0	0	0	0.0214933	0	0.0373408	0	0	0	0	0	0	0.0795462	0.0210094	0.0171125
ENST00000569927.2|ENSG00000260641.2|OTTHUMG00000175889.1|OTTHUMT00000431240.1|TSPAN5-DT-201|TSPAN5-DT|5657	5.657	0	0	0	0	0	2	2	0.353544	0	0	0.0343786	0.056253	0.122074	0.011637	0.00560786	0.0120459	0.0180172	0.0229722	0	0.0172888	0.010719	0.0136812	0	0	0.105952	0.0215971	0	0.0113821	0	0.0294079
ENST00000570073.2|ENSG00000259810.2|OTTHUMG00000177769.2|OTTHUMT00000438894.2|ENST00000570073|ENSG00000259810|2792	2.792	0	0	0	0	0	2	2	0.716332	0	0	0	0	0	0	0	0	0	0	0	0	0	0	0.00874355	0	0	0	0	0	0	0
ENST00000570141.1|ENSG00000260698.1|OTTHUMG00000176475.1|OTTHUMT00000432175.1|ENST00000570141|ENSG00000260698|2968	2.968	0	1	0	0	0	1	2	0.673854	0.107321	0.115325	0.287535	0.356771	4.32361	3.26175	0.100919	0.149364	1.10454	0.984406	3.37553	2.65567	5.52808	2.74635	0.0716163	0.0194978	0.942084	1.10811	1.40984	3.3788	1.18353	3.32743
ENST00000571085.1|ENSG00000262115.1|OTTHUMG00000177843.1|OTTHUMT00000439205.1|ENST00000571085|ENSG00000262115|805	0.805	0	0	1	1	0	0	2	2.48447	0	0	0	0	0	0	0	0	0	0	0	0	0	0	0	0	0	0	0	0	0	0
ENST00000571340.1|ENSG00000262714.1|OTTHUMG00000176690.2|OTTHUMT00000433143.2|ENST00000571340|ENSG00000262714|2142	2.142	0	0	0	0	0	2	2	0.933707	0	0	0	0	0	0	0	0	0	0.0688995	0	0.0522217	0	0.124005	0.0112841	0	0	0	0.0360375	0.0343532	0.0365392	0.0590377
ENST00000571724.3|ENSG00000262877.5|OTTHUMG00000177951.5|OTTHUMT00000439901.3|ENST00000571724|ENSG00000262877|1565	1.565	0	0	1	1	0	0	2	1.27796	0.307461	0.460712	0.494452	0.533006	0.533207	3.46551	0	0	0	0	0.273201	0	0	0.175792	0	0	0	0	0	0	0	0
ENST00000572594.1|ENSG00000262410.1|OTTHUMG00000177848.1|OTTHUMT00000439235.1|ENST00000572594|ENSG00000262410|642	0.642	0	0	0	0	1	1	2	3.11526	0.0443153	0.26901	3.35307	4.73978	21.0029	9.27684	0.816608	0.399341	4.73825	7.63284	2.84533	5.16978	1.04455	7.2549	1.85565	0.149842	7.95444	8.10022	5.6412	2.36627	1.57032	0
ENST00000573866.2|ENSG00000262202.4|OTTHUMG00000178158.2|OTTHUMT00000440781.2|ENST00000573866|ENSG00000262202|637	0.637	1	0	0	0	0	1	2	3.13972	20.4889	22.2318	31.945	68.8496	18.4009	20.548	0.97073	3.69469	176.766	119.334	193.283	95.4898	183.705	81.3667	0.842141	0.120129	1.69101	0	0	0	0	0.64516
ENST00000574180.1|ENSG00000261512.2|OTTHUMG00000175597.2|OTTHUMT00000439485.1|ENST00000574180|ENSG00000261512|1591	1.591	0	0	1	1	0	0	2	1.25707	0.253512	0.218984	0.0696745	0	0.0985651	0.432704	0.581636	0.850077	0	0.205303	0.172576	0.467264	0.654124	0.432212	1.33084	1.39922	1.34988	0.895014	0.996893	2.3067	1.07887	3.15994
ENST00000574826.1|ENSG00000262112.1|OTTHUMG00000178125.1|OTTHUMT00000440617.1|ENST00000574826|ENSG00000262112|538	0.538	0	0	1	1	0	0	2	3.71747	0	0	0	0	0	0	0	0	0	0	0	0	0	0	0	0	0	0	0	0	0	0
ENST00000574885.1|ENSG00000262884.1|OTTHUMG00000177666.1|OTTHUMT00000438369.1|ENST00000574885|ENSG00000262884|2546	2.546	0	0	0	2	0	0	2	0.785546	0	0	0	0	0	0	0	0	0	0	0.030154	0	0	0	0	0	0	0	0	0	0	0
ENST00000575034.5|ENSG00000263069.6|OTTHUMG00000177592.3|OTTHUMT00000437955.1|RNF213-AS1-203|RNF213-AS1|3651	3.651	0	0	0	2	0	0	2	0.547795	0	0.0100805	0	0	0	0	0	0	0	0	0	0	0	0.0247073	0	0.0303733	0	0	0	0	0	0.0849512
ENST00000575312.2|ENSG00000262049.2|OTTHUMG00000178170.1|OTTHUMT00000440811.1|ENST00000575312|ENSG00000262049|1994	1.994	0	0	1	1	0	0	2	1.00301	3.48175	3.69675	2.4613	1.78112	6.50894	14.1956	3.62675	5.9593	14.975	16.0245	4.83431	5.3653	3.53745	4.92464	9.06296	8.01164	23.4153	13.3943	12.229	9.12307	2.95943	3.483
ENST00000575722.1|ENSG00000263146.3|OTTHUMG00000178053.2|OTTHUMT00000440354.1|LINC01896-206|LINC01896|1256	1.256	1	0	0	1	0	0	2	1.59236	0	0	0	0	0	0	0	0	0	0	0	0	0	0	0	0	0	0	0	0	0	0
ENST00000575922.5|ENSG00000260005.6|OTTHUMG00000132137.2|OTTHUMT00000439327.1|ENST00000575922|ENSG00000260005|4506	4.506	0	0	0	1	1	0	2	0.443853	0	0	0	0.00791754	0	0.0295052	0	0	0	0	0.0944698	0	0	0	0.00513729	0	0	0	0.015135	0.0728652	0	0.0250935
ENST00000575985.1|ENSG00000262678.1|OTTHUMG00000177765.1|OTTHUMT00000438880.1|CAMTA2-AS1-201|CAMTA2-AS1|542	0.542	0	0	1	1	0	0	2	3.69004	0	0	0	0	0	0	0	0	0	0	0	0	0	0	0	0	0	0	0	0.421916	0	0
ENST00000577853.1|ENSG00000264207.1|OTTHUMG00000178927.1|OTTHUMT00000444006.1|ENST00000577853|ENSG00000264207|1234	1.234	1	0	0	0	0	1	2	1.62075	0	0	0.0450049	0.163769	0.127766	0.0617483	0.0315478	0.067799	0.450224	0.142487	0	0.218479	0.132282	0	0	0	0.225283	0.137912	0	0	0	0
ENST00000578036.5|ENSG00000291117.1|-|OTTHUMT00000445597.2|ENST00000578036|ENSG00000291117|4318	4.318	0	0	1	1	0	0	2	0.463177	0.946035	0.896635	0.530657	0.32743	3.26461	7.11903	0.43796	0.879244	0	0	0.0637235	0	0	0	0.371441	0.160568	0	0	0	0	0.0860128	0.0422558
ENST00000578387.1|ENSG00000251359.4|OTTHUMG00000160677.1|OTTHUMT00000361702.1|WWC2-AS2-201|WWC2-AS2|2183	2.183	0	0	1	1	0	0	2	0.91617	0.185817	0.143748	0.0707269	0.0343006	0.468678	0.0320947	0.0316669	0.0272139	2.54145	1.88522	0.0726157	0.255096	0	0.282681	0.596953	0.325094	8.78507	4.22267	0.281556	0.570573	0.107057	0.432633
ENST00000578492.5|ENSG00000215769.8|OTTHUMG00000179291.1|OTTHUMT00000445591.1|ARHGAP27P1-BPTFP1-KPNA2P3-201|ARHGAP27P1-BPTFP1-KPNA2P3|2732	2.732	0	0	1	1	0	0	2	0.732064	1.11125	1.15488	0.768777	0.792414	12.97	4.8843	0.983039	0.689011	0.68377	1.12394	0.88837	1.19627	0.568303	0.780617	1.52614	0.644719	2.22323	1.52796	2.82463	2.6704	2.78941	3.35059
ENST00000578897.1|ENSG00000265413.1|OTTHUMG00000178912.1|OTTHUMT00000443934.1|ENST00000578897|ENSG00000265413|2315	2.315	0	0	1	0	0	1	2	0.863931	0	0	0	0	0	0	0	0	0	0	0	0	0	0	0	0	0	0	0.0438784	0.389527	0.70318	0.770979
ENST00000581067.1|ENSG00000264575.1|OTTHUMG00000178804.1|OTTHUMT00000443370.1|LINC00526-201|LINC00526|1875	1.875	0	0	1	1	0	0	2	1.06667	3.9234	3.69657	2.33243	2.09775	6.84796	6.64216	9.01868	6.81737	6.25789	3.45023	4.05062	1.90993	3.24657	4.58118	7.86258	9.88941	12.0399	7.09341	18.2753	15.3117	8.16773	14.3579
ENST00000581489.1|ENSG00000265692.1|OTTHUMG00000178661.1|OTTHUMT00000442824.1|LINC01970-201|LINC01970|1810	1.81	0	0	0	1	1	0	2	1.10497	0	0	0	0	0	0	0.0429114	0.0753145	0	0	0.0548	0	0	0	0	0.0760289	0	0	0	0	0	0
ENST00000581621.1|ENSG00000264772.6|OTTHUMG00000178274.1|OTTHUMT00000441295.1|ENST00000581621|ENSG00000264772|4554	4.554	0	0	1	1	0	0	2	0.439174	1.32303	2.08732	3.99221	3.96061	14.7917	26.8531	2.3697	1.65885	8.96428	10.5476	8.52727	6.80686	13.3148	8.83585	2.19211	1.01977	14.1437	11.6682	4.90889	5.76332	8.92546	7.9494
ENST00000582866.1|ENSG00000263731.1|OTTHUMG00000178529.2|OTTHUMT00000442382.1|ENST00000582866|ENSG00000263731|2682	2.682	0	0	0	0	0	2	2	0.745712	5.6425	5.60356	6.1467	9.79308	21.7779	18.5263	8.24766	6.84126	15.4061	14.4953	14.035	14.0277	19.282	15.5812	6.44266	8.29526	9.13888	6.18895	6.24608	5.69037	9.39151	9.22327
ENST00000583253.1|ENSG00000266783.1|OTTHUMG00000178364.1|OTTHUMT00000441727.1|ENST00000583253|ENSG00000266783|1049	1.049	1	0	0	0	0	1	2	1.90658	0.265398	0.189513	0.649537	1.82123	3.88638	0.421522	0.480395	0.010096	0	0	0.170216	3.12448	1.67727	3.71598	0.200986	0.426934	0	0.498892	0.832564	0.860214	0.485828	0
ENST00000583712.2|ENSG00000264985.4|OTTHUMG00000178451.4|OTTHUMT00000490471.1|ENST00000583712|ENSG00000264985|4315	4.315	0	0	0	1	1	0	2	0.463499	0	0	0	0	0	0	0	0	0	0	0	0	0.00486542	0	0	0	0	0	0	0	0	0
ENST00000584036.1|ENSG00000264596.1|OTTHUMG00000178896.1|OTTHUMT00000443805.1|ENST00000584036|ENSG00000264596|1613	1.613	0	0	0	0	0	2	2	1.23993	0	0	0	0	0	0	0	0	0	0	0	0	0	0	0.217903	0.0325951	0	0.858334	0.0846329	0.675626	0.360098	0.744392
ENST00000584727.1|ENSG00000265579.1|OTTHUMG00000178982.1|OTTHUMT00000444209.1|ENST00000584727|ENSG00000265579|2206	2.206	0	0	0	0	0	2	2	0.906618	0	0	0	0	0	0	0	0	0	0	0.0288528	0	0	0	0	0	0	0	0	0	0	0
ENST00000586694.1|ENSG00000267141.1|OTTHUMG00000179995.1|OTTHUMT00000449216.1|ENST00000586694|ENSG00000267141|607	0.607	0	0	1	1	0	0	2	3.29489	0	0	0	0	0	0	0	0	0	0	0	0	0	0	0	0	0	0	0	0	0	0
ENST00000586923.1|ENSG00000276570.1|OTTHUMG00000180703.1|OTTHUMT00000452661.1|ENST00000586923|ENSG00000276570|3061	3.061	1	1	0	0	0	0	2	0.653381	0.664728	0.790494	5.77361	8.09946	21.6738	39.8609	0.577698	1.00235	5.22955	6.94178	3.5774	3.46611	4.88266	5.22811	0.809499	0.818014	4.94951	4.38167	3.17567	3.3501	4.25976	7.21181
ENST00000587128.1|ENSG00000267058.1|OTTHUMG00000182208.1|OTTHUMT00000460022.1|ENST00000587128|ENSG00000267058|2193	2.193	0	0	0	0	0	2	2	0.911993	0.332665	0.365405	0.45055	0.0550849	1.31659	1.06284	0.237395	0.0678525	0.380092	0.648906	0.00253407	0.314481	0.521574	0.245007	0.401087	0.965233	2.01507	0.288375	0.865275	0.534352	0.579073	0.57796
ENST00000587267.1|ENSG00000267342.1|OTTHUMG00000179918.1|OTTHUMT00000448944.1|ENST00000587267|ENSG00000267342|1419	1.419	0	0	1	1	0	0	2	1.40944	0.0790296	0.267491	0.0926766	0.0793521	0	0.368772	0.0139504	0.0263222	0.361856	0.884891	0	0	0	0	0.0133283	0	0.105091	0.445931	0	0.0587353	0	0
ENST00000588097.5|ENSG00000267750.6|OTTHUMG00000132629.4|OTTHUMT00000255876.2|RUNDC3A-AS1-202|RUNDC3A-AS1|5203	5.203	0	0	0	0	0	2	2	0.384394	0.0117974	0.0103036	0.0278458	0.0423756	0	0.108852	0.00951398	0.0171958	0.0256195	0.0452127	0	0	0.0254364	0	0.0180949	0.0216982	0	0.0623354	0	0	0.0310292	0
ENST00000588104.1|ENSG00000267078.1|OTTHUMG00000180302.1|OTTHUMT00000450653.1|ENST00000588104|ENSG00000267078|1449	1.449	0	0	1	1	0	0	2	1.38026	0	0	0	0	0	0	0	0	3.5173	3.17144	0	0.0575463	0	0	0	0	0	1.75475	0	1.40362	0	1.15202
ENST00000588279.2|ENSG00000260793.4|OTTHUMG00000176046.2|OTTHUMT00000457736.1|ENST00000588279|ENSG00000260793|1494	1.494	1	0	0	1	0	0	2	1.33869	0.0535311	0.0250656	0.369269	0.750675	5.27135	0	0.0611394	0	0	0	0.152592	0.752888	0.00819964	0.375298	0.0985391	0.123482	0	0	0	0	0.424679	0.222195
ENST00000588387.2|ENSG00000267169.2|OTTHUMG00000182142.3|OTTHUMT00000459718.2|ADGRL1-AS1-201|ADGRL1-AS1|2894	2.894	0	0	2	0	0	0	2	0.691085	0.337812	0.341085	0.198743	0.0949674	1.62318	2.11434	0.244194	0.433726	0.54887	0.444776	0.105858	0.211028	0.139336	0.663651	0.10649	0.0597714	0	0.0542118	0.143785	0.135866	0.0293661	0.274413
ENST00000588672.1|ENSG00000267690.1|OTTHUMG00000181929.1|OTTHUMT00000458344.1|LDLRAD4-AS1-201|LDLRAD4-AS1|2190	2.19	0	0	0	1	0	1	2	0.913242	0	0	0	0	0	0	0	0	0	0	0	0	0	0	0	0	0	0	0	0	0	0
ENST00000589360.1|ENSG00000267436.1|OTTHUMG00000181924.1|OTTHUMT00000458321.1|ENST00000589360|ENSG00000267436|565	0.565	0	0	1	1	0	0	2	3.53982	0	0.0461846	0.222991	0	0.19749	0.636287	0.0326199	0	0	0	0	0	0	0	0	0	0	0	0	0	0	0
ENST00000589379.1|ENSG00000267607.1|OTTHUMG00000180404.2|OTTHUMT00000451213.1|ICAM4-AS1-201|ICAM4-AS1|3219	3.219	0	0	1	1	0	0	2	0.621311	0.665269	0.591845	2.10967	2.38066	10.6626	17.1314	0.191451	0.330493	5.97191	5.12717	1.07838	1.45141	0.27887	0.612626	0	0	0.197966	0.24216	0.0442397	0	0	0.0365271
ENST00000589716.5|ENSG00000197291.9|OTTHUMG00000180647.2|OTTHUMT00000452373.1|RAMP2-AS1-202|RAMP2-AS1|1985	1.985	0	0	1	1	0	0	2	1.00756	0	0	0	0.0190518	0.0744293	0	0	0	0	0	0	0.0574022	0	0	0.360751	0.0919836	0.308762	0.220717	0	0.292494	0.125439	0.187763
ENST00000589795.1|ENSG00000267199.1|OTTHUMG00000180776.1|OTTHUMT00000452981.1|ENST00000589795|ENSG00000267199|4910	4.91	0	0	0	0	0	2	2	0.407332	0.0673866	0	0	0.0853112	1.17869	0	0.0605195	0	0	0	0.0848347	0.0113459	0	0	0	0.0416822	0	0.179034	0.14409	0.207505	0.0267411	0
ENST00000589796.2|ENSG00000267288.2|OTTHUMG00000180194.2|OTTHUMT00000450189.2|ENST00000589796|ENSG00000267288|2053	2.053	0	0	0	2	0	0	2	0.974184	0	0	0	0	0	0	0	0.00730187	0	0	0	0	0	0	0.126451	0.0991531	0	0	0.566915	0.656281	1.15874	0.783674
ENST00000589967.1|ENSG00000266985.1|OTTHUMG00000180471.1|OTTHUMT00000451442.1|ENST00000589967|ENSG00000266985|1389	1.389	0	0	1	1	0	0	2	1.43988	0	0	0	0	0	0	0	0	0	0	0	0	0	0	0	0	0	0	0	0	0	0
ENST00000590226.1|ENSG00000291024.1|-|OTTHUMT00000451403.1|ENST00000590226|ENSG00000291024|5589	5.589	0	0	0	0	0	2	2	0.357846	0	0	0.00258668	0	0	0	0	0.00212894	0	0.224183	0.0321712	0	0.0490636	0.0468274	0	0	0	0	0	0	0	0
ENST00000590966.2|ENSG00000267365.2|OTTHUMG00000180350.1|OTTHUMT00000450887.1|KCNJ2-AS1-201|KCNJ2-AS1|2444	2.444	0	0	0	2	0	0	2	0.818331	0	0	0	0	0	0	0	0	0.0462155	0.0587995	0	0	0	0	0	0	0.0911529	0	0	0	0	0
ENST00000591212.1|ENSG00000267204.1|OTTHUMG00000180236.1|OTTHUMT00000450352.1|LINC01782-201|LINC01782|2908	2.908	0	1	0	0	0	1	2	0.687758	0	0	0	0	0	0	0	0	0	0	0	0	0	0	0	0	0	0	0	0	0	0
ENST00000591237.1|ENSG00000267632.1|OTTHUMG00000181855.1|OTTHUMT00000457976.1|ENST00000591237|ENSG00000267632|1736	1.736	0	1	0	1	0	0	2	1.15207	0.522472	0.553864	3.36385	1.61888	34.093	35.5033	0.0401434	0	5.88364	8.75869	4.5955	2.5716	0.195457	0	0.461823	0.0782123	2.66103	4.1097	0	0	1.18429	0
ENST00000591705.1|ENSG00000267075.1|OTTHUMG00000178379.2|OTTHUMT00000441761.2|ENST00000591705|ENSG00000267075|4582	4.582	0	0	0	1	0	1	2	0.436491	0	0	0	0	0	0	0	0	0	0	0	0	0	0	0	0	0	0	0	0	0	0
ENST00000592034.1|ENSG00000267769.1|OTTHUMG00000182006.1|OTTHUMT00000458641.1|ENST00000592034|ENSG00000267769|510	0.51	0	0	1	1	0	0	2	3.92157	0.207325	0.00351564	0	0	0	0	0	0	0	0	0.187199	0	1.6303	0.398342	0.0712211	0	1.14877	0	0	0	2.12939	0
ENST00000592174.1|ENSG00000221857.7|OTTHUMG00000182360.1|OTTHUMT00000460765.1|ENST00000592174|ENSG00000221857|728	0.728	0	0	1	1	0	0	2	2.74725	NA	NA	NA	NA	NA	NA	NA	NA	NA	NA	NA	NA	NA	NA	NA	NA	NA	NA	NA	NA	NA	NA
ENST00000592440.1|ENSG00000267765.1|OTTHUMG00000180644.1|OTTHUMT00000452346.1|ENST00000592440|ENSG00000267765|719	0.719	0	0	1	1	0	0	2	2.78164	0.0904734	0.00636071	0	0	0	0	0	0	0	0.0375273	0.202897	0	0	0	0.0450267	0	0	0	0	0	0	0
ENST00000592465.1|ENSG00000267077.1|OTTHUMG00000177884.1|OTTHUMT00000439467.1|ENST00000592465|ENSG00000267077|720	0.72	0	0	1	1	0	0	2	2.77778	0.123994	0	0	0	0	0	0	0	0	0	0	0	0	0	0	0	0	0	0.212836	0	0	0
ENST00000592843.1|ENSG00000267778.1|OTTHUMG00000180142.3|OTTHUMT00000449957.3|CBARP-DT-201|CBARP-DT|844	0.844	0	0	1	1	0	0	2	2.36967	0.108317	0.279068	0	0	0	0	0.0331602	0.0916047	0	0	0	0	0	0	0.0657895	0.161397	0	0	0	0	0	0
ENST00000594230.1|ENSG00000269397.1|OTTHUMG00000183390.1|OTTHUMT00000466446.1|ENST00000594230|ENSG00000269397|1500	1.5	0	0	0	0	0	2	2	1.33333	0.929593	0.423499	2.67451	5.33576	12.0975	3.69274	1.79378	0.529011	0	9.98109	0.5634	5.61899	2.51824	4.04547	0	0	0	0	0	0	0	0
ENST00000595059.1|ENSG00000269473.1|OTTHUMG00000183538.1|OTTHUMT00000467037.1|ZNF132-DT-201|ZNF132-DT|5402	5.402	0	1	0	0	0	1	2	0.370233	0.367889	0.37817	0.450947	0.67595	3.17857	1.96629	0.394548	0.379896	0.662692	0.506992	0.142158	0.381617	0.405524	0.359576	0.277455	0.3548	0.259874	0.204308	0.148964	0.143594	0.0881778	0.103038
ENST00000595748.2|ENSG00000231412.3|OTTHUMG00000182827.1|OTTHUMT00000463917.1|ENST00000595748|ENSG00000231412|721	0.721	0	0	1	0	1	0	2	2.77393	0	0	0	0	0.250938	0.123362	0	0	0	0	0	0	0	0	0	0	0	0	0	0	0	0
ENST00000595783.1|ENSG00000269037.1|OTTHUMG00000182959.1|OTTHUMT00000464428.1|LINC01838-201|LINC01838|1657	1.657	0	0	1	0	1	0	2	1.207	0	0	0	0	0	0	0	0	0	0	0	0	0	0	0	0	0	0	0	0	0	0
ENST00000595842.2|ENSG00000268170.2|OTTHUMG00000187176.1|OTTHUMT00000474534.1|ENST00000595842|ENSG00000268170|1800	1.8	0	0	0	0	0	2	2	1.11111	0.0228813	0.0393312	0.364798	0.700673	3.14918	0.796211	0	0	0.404039	0	0.0462711	0	0.159218	0.205818	0	0	0.133437	0	0.135107	0.213736	0.0456471	0.183505
ENST00000596207.2|ENSG00000267857.2|OTTHUMG00000187465.1|OTTHUMT00000475038.1|ENST00000596207|ENSG00000267857|608	0.608	0	0	1	1	0	0	2	3.28947	0	0	0	0	0	0	0	0	0	0	0	0	0	0	0	0	0	0	0	0	0	0
ENST00000596350.1|ENSG00000268231.1|OTTHUMG00000183148.1|OTTHUMT00000465239.1|ENST00000596350|ENSG00000268231|813	0.813	0	0	0	1	0	1	2	2.46002	0	0.0608783	0	0	0.101567	0.763712	0	0	0	0	0	0	0	0	0	0	0	0	0	0	0	0
ENST00000597411.1|ENSG00000268030.1|OTTHUMG00000183108.1|OTTHUMT00000465111.1|ENST00000597411|ENSG00000268030|2001	2.001	0	0	1	1	0	0	2	0.9995	0	0	0	0	0.0736798	0	0	0	0	0	0	0	0.0348731	0	0	0	0	0	0.078545	0.0373793	0.0398144	0.128438
ENST00000597592.1|ENSG00000269350.1|OTTHUMG00000182666.1|OTTHUMT00000462945.1|ENST00000597592|ENSG00000269350|661	0.661	0	0	1	1	0	0	2	3.02572	0	0	0	0	0	0	0	0	0	0	0	0	0	0	0	0	0	0	0	0	0	0
ENST00000597973.1|ENSG00000268678.1|OTTHUMG00000183244.1|OTTHUMT00000465781.1|ENST00000597973|ENSG00000268678|1045	1.045	0	0	1	1	0	0	2	1.91388	0.0420711	0.144566	0.0274764	0.320016	0	0	0	0	0.870522	0	0	0	0	0	0.0761119	0.0622174	2.63264	0.179139	0.100349	0	0	0.158582
ENST00000597983.1|ENSG00000269243.1|OTTHUMG00000182239.1|OTTHUMT00000460193.1|ENST00000597983|ENSG00000269243|2987	2.987	0	0	1	1	0	0	2	0.669568	0.0133254	0.0662727	0	0	0	0	0	0	0	0	0	0	0	0	0	0	0.0579443	0	0	0	0	0
ENST00000598590.1|ENSG00000269846.1|OTTHUMG00000187317.1|OTTHUMT00000474752.1|ENST00000598590|ENSG00000269846|1394	1.394	0	0	1	1	0	0	2	1.43472	0.363812	0.182365	0.0975611	0.198785	0.221598	0.480833	0.171162	0.174226	1.2298	1.43902	0.130505	0.183227	0.334316	0.29014	0.453971	0.534194	2.45164	0.577123	0.768102	0.421491	0.194493	0
ENST00000599050.1|ENSG00000268366.1|OTTHUMG00000182596.1|OTTHUMT00000462576.1|SERTAD3-AS1-201|SERTAD3-AS1|558	0.558	0	0	1	1	0	0	2	3.58423	0	0	0	0	0	0	0.107546	0	0	0	0	0	0	0	0.0569094	0	0	0	0	0	0	0
ENST00000599198.5|ENSG00000291083.1|-|OTTHUMT00000465180.1|CYP2B7P-203|CYP2B7P|2956	2.956	0	0	0	0	0	2	2	0.67659	0	0	0	0.00659251	0	0.038201	0.0134549	0.0048395	0.00873123	0	0	0	0	0	0	0.0195817	0	0	0	0.0404272	0	0
ENST00000599515.2|ENSG00000268069.2|OTTHUMG00000187385.2|OTTHUMT00000474866.2|ENST00000599515|ENSG00000268069|1080	1.08	0	0	1	1	0	0	2	1.85185	0.728939	0.452274	1.68934	1.80608	6.14396	7.40922	0.438715	0.921391	2.47889	3.65415	0.0955744	0.804393	0.322648	1.59267	0.121994	0.0598315	0.554392	0.169742	0	0	0.76841	0.150486
ENST00000599640.6|ENSG00000227733.12|OTTHUMG00000013881.20|OTTHUMT00000351198.4|ENST00000599640|ENSG00000227733|4994	4.994	0	0	0	1	0	1	2	0.400481	0	0	0	0	0.00894026	0	0	0	0	0.036965	0	0	0	0	0	0.0223908	0	0.012435	0	0	0.00657386	0
ENST00000599784.1|ENSG00000267898.1|OTTHUMG00000183331.1|OTTHUMT00000466231.1|ENST00000599784|ENSG00000267898|819	0.819	0	0	1	1	0	0	2	2.442	0	0	0	0.147414	0.371988	0	0	0.0123984	0	0	0	0	0.32395	0.673562	0	0	0	0	1.05411	0	0	0.495677
ENST00000600169.2|ENSG00000269559.2|OTTHUMG00000187203.1|OTTHUMT00000474573.1|ENST00000600169|ENSG00000269559|1863	1.863	0	0	1	1	0	0	2	1.07354	0.573101	0.606239	0.351061	0.592543	1.83434	0.804219	0.0761189	0.0490643	6.05901	6.87922	0.841181	0.497574	0.838532	0.935448	0.157675	0.096611	1.27644	1.71814	0.473608	0.40906	0.174572	0.21076
ENST00000600669.1|ENSG00000269194.1|OTTHUMG00000183160.1|OTTHUMT00000465313.1|ENST00000600669|ENSG00000269194|520	0.52	0	0	1	1	0	0	2	3.84615	0.100901	0	0	0	0	0	0	0	0	0	0	0	0	0	0.0630024	0	0	0	0	0	0	0
ENST00000600805.2|ENSG00000268509.2|OTTHUMG00000187143.1|OTTHUMT00000474482.1|ENST00000600805|ENSG00000268509|1127	1.127	0	0	1	1	0	0	2	1.77462	0	0.106253	0.0508568	0.0364978	0.290319	0	0.011841	0.122156	0.128921	0	0	0	0	0	0.0464105	0	0	0	0	0	0.0895933	0
ENST00000602342.1|ENSG00000269984.1|OTTHUMG00000184028.1|OTTHUMT00000467805.1|ENST00000602342|ENSG00000269984|3143	3.143	0	0	0	0	0	2	2	0.636335	0	0	0.0159115	0.0115731	0.22597	0.043202	0	0	0.0344766	0	0.0235809	0	0	0	0.0149791	0	0	0	0	0	0	0
ENST00000602385.1|ENSG00000270141.3|OTTHUMG00000184024.2|OTTHUMT00000467796.2|TERC-201|TERC|541	0.541	1	0	0	1	0	0	2	3.69686	33.1499	39.236	75.6736	84.2954	59.157	120.495	0.976921	2.01947	294.493	245.146	395.267	252.014	391.918	150.944	43.7886	8.00092	472.173	437.711	299.677	280.376	280.455	339.057
ENST00000602396.1|ENSG00000269945.1|OTTHUMG00000183951.1|OTTHUMT00000467569.1|ENST00000602396|ENSG00000269945|3625	3.625	0	0	0	0	0	2	2	0.551724	0.0108826	0	0.00684258	0.00453017	0.038868	0	0	0	0	0	0	0	0	0.0223096	0.0128917	0	0	0	0	0	0	0
ENST00000602431.1|ENSG00000269892.1|OTTHUMG00000183941.1|OTTHUMT00000467556.1|ENST00000602431|ENSG00000269892|657	0.657	1	0	0	0	0	1	2	3.04414	0	0.0634576	0.100588	0.219879	0.285226	0.422705	0.159008	0	0.356717	0	0	0	1.21885	0.565795	0.0454291	0	0.754748	0	0.815847	0.69916	0.273229	0.196364
ENST00000602663.1|ENSG00000270055.1|OTTHUMG00000183910.1|OTTHUMT00000467504.1|ENST00000602663|ENSG00000270055|2351	2.351	0	0	0	0	0	2	2	0.850702	1.82301	1.51269	5.50453	9.24515	49.4067	7.36996	3.54702	1.05502	12.666	13.4141	14.1061	19.2831	20.7146	26.8789	0.943175	0.617544	7.15562	6.90857	10.2077	10.6266	4.59972	7.45345
ENST00000603415.1|ENSG00000270277.1|OTTHUMG00000180305.1|OTTHUMT00000450681.1|ENST00000603415|ENSG00000270277|1798	1.798	0	0	0	0	0	2	2	1.11235	1.44805	1.01209	7.23838	13.0999	64.0101	14.2754	1.47675	1.02986	6.09274	10.2295	14.8233	12.3176	9.11734	12.8231	0.35129	0.126799	4.35914	1.89125	4.41234	2.91918	1.04417	0.881976
ENST00000603468.1|ENSG00000270607.1|OTTHUMG00000185180.1|OTTHUMT00000469731.1|NAV2-AS6-201|NAV2-AS6|1686	1.686	1	0	1	0	0	0	2	1.18624	0	0.063358	0.0471115	0.091406	0.17837	0	0	0	0.439608	0.744219	0	0.0707731	0.0432751	0	0.0440096	0	0	0	0	0	0.0497834	0
ENST00000604014.2|ENSG00000270761.2|OTTHUMG00000185189.1|OTTHUMT00000469771.1|CD2AP-DT-201|CD2AP-DT|953	0.953	0	0	1	1	0	0	2	2.09864	1.31195	1.69053	1.78559	2.46571	4.19443	5.44023	1.11693	1.72834	16.5464	16.1754	1.17695	1.3199	0.886457	0.914875	0.595085	0.556023	8.89802	4.19289	0.826074	0.108259	1.31213	0.554098
ENST00000604017.1|ENSG00000271382.1|OTTHUMG00000170327.2|OTTHUMT00000408524.2|ENST00000604017|ENSG00000271382|2773	2.773	0	0	0	0	0	2	2	0.721241	0.0144104	0.0123878	0.200097	0.317556	1.18831	0.271871	0.00402985	0.0051944	0.238992	0.253512	0.299907	0.191608	0.236295	0.333627	0.0342105	0	0	0.14396	0.157986	0.252172	0.160244	0.10844
ENST00000604070.1|ENSG00000271533.1|OTTHUMG00000184205.1|OTTHUMT00000468302.1|ENST00000604070|ENSG00000271533|3685	3.685	0	0	0	0	0	2	2	0.542741	1.31343	0.815675	2.25544	5.28298	21.3377	1.15764	0.291301	0.0407837	2.29683	1.25943	5.56787	4.58039	1.33852	1.57699	1.59157	0.507632	8.09747	7.15775	11.1054	18.5612	6.30077	10.9632
ENST00000604104.1|ENSG00000271155.1|OTTHUMG00000185271.1|OTTHUMT00000470022.1|ENST00000604104|ENSG00000271155|1402	1.402	0	0	1	1	0	0	2	1.42653	0.481996	0.388298	0.581503	0.394943	1.65102	3.1841	0.178889	0.668879	3.8479	5.11597	1.16512	0.727042	0.884539	0.935403	1.29897	0.928782	16.8358	14.7694	5.96726	5.01749	1.02878	1.48474
ENST00000604634.1|ENSG00000271360.1|OTTHUMG00000185156.1|OTTHUMT00000469677.1|USP6NL-AS1-201|USP6NL-AS1|923	0.923	0	0	1	1	0	0	2	2.16685	0.194645	0.334369	0.640916	0.79336	0	0.354258	0	0	5.17252	4.94289	0.373505	0.174494	0	0.41471	0.0294608	0	1.44925	1.33169	0.125196	0	0	0
ENST00000604760.1|ENSG00000270964.1|OTTHUMG00000185153.1|OTTHUMT00000469673.1|MAP2K5-DT-201|MAP2K5-DT|1533	1.533	0	0	1	1	0	0	2	1.30463	0.954872	0.937815	0.734697	1.06918	1.68876	2.24782	1.3939	1.2807	9.804	9.48718	1.25876	2.16946	1.17625	1.33586	0.326241	0.399853	5.78235	3.48006	1.34256	0.528237	1.98367	0.951455
ENST00000604982.2|ENSG00000271643.2|OTTHUMG00000185052.3|OTTHUMT00000498911.2|PDCD6IP-DT-201|PDCD6IP-DT|4524	4.524	0	0	0	0	0	2	2	0.442087	0	0	0	0	0	0	0	0	0.17314	0	0	0	0	0	0	0	0.270033	0	0.119839	0	0	0
ENST00000604992.2|ENSG00000270194.2|OTTHUMG00000185097.1|OTTHUMT00000469553.1|GOLGA4-AS1-201|GOLGA4-AS1|2414	2.414	1	0	0	0	0	1	2	0.8285	0.784438	0.760379	1.23593	1.33704	1.86007	2.40193	0.513073	1.5066	8.16075	6.9812	0.642691	1.35482	0.50035	1.35828	1.79527	1.92015	15.1731	8.43263	2.95414	2.7633	0.756839	1.73694
ENST00000605056.1|ENSG00000270210.1|OTTHUMG00000185292.1|OTTHUMT00000470097.1|ENST00000605056|ENSG00000270210|775	0.775	0	0	0	0	0	2	2	2.58065	0	0	0	0	0	0	0	0	0	0	0	0.2438	0	0	0.0366232	0	0	0.312613	0.715625	0.958143	0	0.677511
ENST00000605085.1|ENSG00000271380.1|OTTHUMG00000185142.1|OTTHUMT00000469658.1|ENST00000605085|ENSG00000271380|799	0.799	0	0	1	1	0	0	2	2.50313	0.752479	1.24264	0.347124	0.168538	0.65655	1.39245	0.231488	1.69183	2.79096	0.291718	0.163614	0.458096	0.134556	0.181505	1.86741	1.55589	14.8276	2.93191	1.00368	1.05054	0.50621	0.509867
ENST00000605249.1|ENSG00000271204.1|OTTHUMG00000185224.1|OTTHUMT00000469909.1|ENST00000605249|ENSG00000271204|1998	1.998	0	0	0	0	0	2	2	1.001	0.604376	0.241207	1.71024	3.28621	13.4032	2.20563	0	0	10.1729	10.7189	1.99823	3.8827	0.67153	0.220651	0.889376	0.0764012	12.6919	14.1104	2.83816	2.73724	2.64155	2.41872
ENST00000605298.1|ENSG00000258940.2|OTTHUMG00000170769.2|OTTHUMT00000469934.1|MIA2-AS1-202|MIA2-AS1|1359	1.359	0	0	1	1	0	0	2	1.47167	0.552114	0.160815	0.210725	0.11492	1.14114	0.770685	0.325506	0.52359	2.54853	2.60867	0.219313	0.0949653	0.519375	0.451143	0.776794	0.824825	7.43112	4.66806	1.39484	0.624113	1.74898	1.337
ENST00000605739.1|ENSG00000271151.1|OTTHUMG00000185087.1|OTTHUMT00000469543.1|ENST00000605739|ENSG00000271151|1068	1.068	0	0	0	0	0	2	2	1.87266	0.164092	0.35242	1.20405	1.71393	16.8693	3.82989	0.698437	0.213335	17.6598	27.4442	1.26493	3.27558	0.902726	2.16189	0.276138	0	32.7426	17.1122	2.12805	1.97148	0.880669	0.229751
ENST00000605778.1|ENSG00000271122.1|OTTHUMG00000185082.1|OTTHUMT00000469537.1|HERPUD2-AS1-201|HERPUD2-AS1|4200	4.2	1	0	0	1	0	0	2	0.47619	2.73219	2.14515	1.87479	1.6297	7.46524	6.28971	3.44564	3.05315	13.9242	10.4434	2.92646	3.10984	3.37572	3.57798	1.28783	1.86868	8.1175	5.89142	3.17453	2.51947	2.14187	2.76535
ENST00000606070.1|ENSG00000272476.1|OTTHUMG00000185803.1|OTTHUMT00000471328.1|ENST00000606070|ENSG00000272476|2574	2.574	0	0	1	1	0	0	2	0.777001	1.93438	1.64957	0.936181	1.27596	2.01517	2.25064	0.888958	1.04991	5.60675	4.53537	1.6073	0.794832	1.00508	1.05952	0.213008	0.456191	3.16989	2.25342	0.834482	0.880826	0.408574	0.189345
ENST00000606125.1|ENSG00000272316.1|OTTHUMG00000185767.1|OTTHUMT00000471199.1|ENST00000606125|ENSG00000272316|5352	5.352	0	1	0	0	0	1	2	0.373692	0.556917	0.43924	0.680723	1.17618	4.64334	0.620492	0.608512	0.167073	1.42312	2.3651	1.9697	3.47909	1.85204	3.92789	0.43477	0.11047	4.49973	3.01481	3.19919	4.44064	0.868652	1.39234
ENST00000606221.1|ENSG00000272046.1|OTTHUMG00000185728.1|OTTHUMT00000471083.1|ENST00000606221|ENSG00000272046|3599	3.599	0	0	0	0	0	2	2	0.55571	0.0548225	0.028279	0	0.0100246	0.11745	0	0.00321114	0.0039023	0	0.11303	0.0404301	0.142097	0	0.0224911	0.00649466	0	0.116243	0.0355466	0.0778687	0.0748212	0.0197505	0.0482936
ENST00000606274.1|ENSG00000272008.1|OTTHUMG00000185794.1|OTTHUMT00000471304.1|ENST00000606274|ENSG00000272008|4127	4.127	1	0	0	1	0	0	2	0.484614	0.152172	0.163536	0.0835427	0.104159	0.644115	0.177968	0.0470215	0.0740727	0.330146	0.291258	0	0.0487814	0.0603766	0.0772088	0.0506599	0.124117	0.34903	0.152467	0.0166867	0.0160551	0.0169314	0.0276415
ENST00000606287.1|ENSG00000272183.1|OTTHUMG00000185364.1|OTTHUMT00000470328.1|ENST00000606287|ENSG00000272183|649	0.649	1	0	1	0	0	0	2	3.08166	0.150198	0	1.27925	0.52201	2.90186	4.87734	0.0270721	0.139652	0.735557	0	1.0556	1.10451	3.55553	1.75256	1.524	0.566762	17.1639	8.62449	2.81862	6.97592	1.69866	1.21519
ENST00000606401.1|ENSG00000272323.1|OTTHUMG00000185459.1|OTTHUMT00000470559.1|TTC23L-AS1-201|TTC23L-AS1|1565	1.565	0	0	1	0	0	1	2	1.27796	0.346676	0.263618	0.0113859	0	0.679197	0.186796	0.070306	0.251784	0.43907	0	0.111278	0	0.190754	0.0618606	0.3567	0.976745	0	0.643592	0.491915	0.416959	0.605893	0.39662
ENST00000606533.1|ENSG00000271806.1|OTTHUMG00000185365.1|OTTHUMT00000470331.1|ENST00000606533|ENSG00000271806|4196	4.196	0	0	0	1	0	1	2	0.476644	0	0.00803757	0	0	0	0	0	0	0	0	0	0	0	0	0	0	0	0	0	0	0	0
ENST00000606723.2|ENSG00000272462.4|OTTHUMG00000185699.10|OTTHUMT00000471019.2|LINC02980-201|LINC02980|4130	4.13	0	0	0	0	0	2	2	0.484262	0.827539	0.551132	1.51604	1.91294	5.30124	3.16701	1.74582	0.838479	0.692351	0	1.83227	2.74784	2.35867	3.38877	0.918955	0.831462	1.90206	2.64819	2.77373	2.36888	5.3773	4.07514
ENST00000606915.1|ENSG00000268592.3|OTTHUMG00000185354.1|OTTHUMT00000470302.1|RAET1E-AS1-203|RAET1E-AS1|1210	1.21	0	0	0	2	0	0	2	1.65289	0.0320947	0	0	0.00607781	0	0	0.00876844	0.0410796	0	0	0	0	0	0	0.115213	0	0	0.0449316	0.0509741	0.132108	0.289051	0.230441
ENST00000606966.2|ENSG00000272473.2|OTTHUMG00000181787.1|OTTHUMT00000457601.1|ENST00000606966|ENSG00000272473|1650	1.65	0	0	1	1	0	0	2	1.21212	0	0.0216527	0	0.0468306	0	0.0439485	0.0219836	0.0188974	0	0	0	0	0	0.0577053	0.451666	0.33147	2.99201	1.0985	0.505741	0.478782	0.9225	0.534112
ENST00000607014.1|ENSG00000272345.1|OTTHUMG00000185688.1|OTTHUMT00000470997.1|ENST00000607014|ENSG00000272345|887	0.887	0	0	0	0	0	2	2	2.25479	0.306127	0.350564	2.89826	5.15359	9.37253	2.89082	0.808789	0.234144	17.9832	28.168	15.2517	18.5582	7.56634	14.5549	0.525848	1.13815	12.4721	23.4018	5.80777	10.5729	5.18453	5.75854
ENST00000607286.5|ENSG00000225138.8|OTTHUMG00000167373.5|OTTHUMT00000470449.1|SLC9A3-AS1-207|SLC9A3-AS1|1357	1.357	0	1	0	1	0	0	2	1.47384	0	0	0.0567413	0	0	0.0997981	0.0325151	0	0	0	0	0	0	0	0	0	0	0	0	0	0	0
ENST00000607421.2|ENSG00000272173.2|OTTHUMG00000185702.1|OTTHUMT00000471024.1|ENST00000607421|ENSG00000272173|1123	1.123	0	0	1	1	0	0	2	1.78094	0	0.066525	0.151077	0.183272	0.428858	0.41538	0.487777	0.644356	0.907378	0.819421	0.449282	0.126066	0.152006	0.499184	0.0233023	0.171418	1.56263	0.797328	0.623347	0.579548	0.810981	0
ENST00000607541.1|ENSG00000272202.1|OTTHUMG00000185634.1|OTTHUMT00000470890.1|ENST00000607541|ENSG00000272202|1159	1.159	0	0	1	1	0	0	2	1.72563	0	0.0962488	0.024244	0.0352914	0.275293	0	0	0.0294293	0.864841	0.156273	0	0	0.072497	0	0.0224573	0.0550652	0.99157	0.910636	0.0846503	0	0	0
ENST00000607572.1|ENSG00000271989.1|OTTHUMG00000185648.1|OTTHUMT00000470922.1|ENST00000607572|ENSG00000271989|797	0.797	1	0	0	1	0	0	2	2.50941	0.348363	0.548436	0.928713	0.845468	2.41527	4.83635	0.58095	0.849176	4.90824	5.8626	0.164447	0	0.135199	0.182426	0.141383	0.086713	7.21119	2.65245	0.336351	0	0	0.384299
ENST00000607876.2|ENSG00000272848.2|OTTHUMG00000185870.2|OTTHUMT00000471579.2|ENST00000607876|ENSG00000272848|4107	4.107	0	0	1	1	0	0	2	0.486973	0.0270585	0.0230492	0.017277	0	0	0.00893283	0.0681519	0.0939015	0	0	0	0	0.00822519	0	0.0522823	0.0177603	0	0	0.0773114	0	0.166138	0.128298
ENST00000607893.2|ENSG00000273428.4|OTTHUMG00000186202.1|OTTHUMT00000472412.1|ENST00000607893|ENSG00000273428|1978	1.978	1	0	0	0	0	1	2	1.01112	0.0619788	0	0.159742	0.342302	3.31e-07	0.530475	0.137572	0.0304963	0.215632	0.0656344	0	0	0.136545	0	0	0	0	0	0	0.160294	0	0
ENST00000608335.1|ENSG00000272983.1|OTTHUMG00000186215.1|OTTHUMT00000472430.1|ENST00000608335|ENSG00000272983|7063	7.063	0	0	0	0	0	2	2	0.283166	0	0	0	0.0428528	0.0708907	0	0.000124752	0.00522184	0	0	0.0229843	0	0	0	0	0	0.0369386	0	0	0.0406291	0	0
ENST00000608358.1|ENSG00000273381.1|OTTHUMG00000186454.1|OTTHUMT00000473175.1|ENST00000608358|ENSG00000273381|4125	4.125	0	1	0	0	0	1	2	0.484848	0.0441276	0.025989	0.293501	0.336518	2.09987	0.666988	0.0215413	0	0.366732	0.516873	0.284627	0	0.175511	0.108257	0.260255	0.162511	4.60137	4.78856	0.908387	1.72623	1.12728	1.02344
ENST00000608442.2|ENSG00000272620.2|OTTHUMG00000186238.2|OTTHUMT00000472463.2|AFAP1-AS1-201|AFAP1-AS1|6808	6.808	0	0	0	2	0	0	2	0.293772	3.62652	2.94193	0.518413	0.377735	7.82196	0.998277	17.5587	10.8533	0.270398	0.619435	6.09457	6.07077	15.5842	12.2442	0	0	0	0	0	0	0	0.0210227
ENST00000608477.1|ENSG00000273270.1|OTTHUMG00000186328.1|OTTHUMT00000472940.1|ENST00000608477|ENSG00000273270|7054	7.054	0	0	1	1	0	0	2	0.283527	1.43771	1.21022	0.760108	0.811251	3.30598	3.35312	0.255232	0.395879	3.52854	4.35769	0.358819	0.707743	0.296251	0.539211	0.564717	0.420724	2.33392	0.983912	0.495224	0.285305	0.311918	0.255263
ENST00000608792.1|ENSG00000233117.4|OTTHUMG00000017572.17|OTTHUMT00000472229.2|LINC00702-203|LINC00702|6300	6.3	0	0	0	0	0	2	2	0.31746	0	0	0	0	0	0	0	0	0	0	0	0	0	0	0	0	0	0	0	0	0	0
ENST00000608834.1|ENSG00000272563.1|OTTHUMG00000186041.1|OTTHUMT00000472113.1|ENST00000608834|ENSG00000272563|3443	3.443	0	0	0	0	0	2	2	0.580889	0	0	0	0.0630334	0.0410316	0.0195985	0	0	0.0310876	0	0.192445	0	0.0553897	0	0.00692339	0	0.550012	0.336389	0.327603	0.511273	0.270042	0.169216
ENST00000609422.1|ENSG00000273302.1|OTTHUMG00000185935.1|OTTHUMT00000471752.1|ENST00000609422|ENSG00000273302|791	0.791	0	0	0	0	0	2	2	2.52845	0	0	0.312661	1.02471	0.887034	0.542892	0.0195914	0	0.94893	1.48724	0	0.701289	0.274332	0	0.0356853	0	0.48835	0.299391	0	0	0	0
ENST00000609436.1|ENSG00000272767.1|OTTHUMG00000186280.1|OTTHUMT00000472626.1|JMJD1C-AS1-201|JMJD1C-AS1|1335	1.335	0	0	1	1	0	0	2	1.49813	1.49556	1.80461	0.656564	0.866006	1.74756	1.85526	2.04493	5.2979	2.81435	2.16506	0.346944	0.0974091	0.591564	0.539888	0.743944	1.07561	0.601917	0.368426	0.613645	0.0640138	0.414289	0.493602
ENST00000609602.2|ENSG00000236499.3|OTTHUMG00000186112.1|OTTHUMT00000472273.1|LINC00896-201|LINC00896|2145	2.145	0	0	1	1	0	0	2	0.932401	0.908867	0.732388	5.03509	4.98289	12.8319	28.3717	1.53479	1.97152	31.2122	22.9732	1.26141	2.08527	0.480454	0.660222	0.0338009	0	0	0.130767	0	0	0	0
ENST00000609661.5|ENSG00000229373.9|OTTHUMG00000017394.3|OTTHUMT00000473163.1|LINC00452-202|LINC00452|2896	2.896	0	0	0	1	0	1	2	0.690608	0	0	0.00335868	0	0	0.0157309	0	0	0	0	0	0	0	0	0	0	0	0	0	0	0	0
ENST00000609803.3|ENSG00000273015.3|OTTHUMG00000185943.2|OTTHUMT00000471803.2|LINC00938-201|LINC00938|9815	9.815	0	0	0	0	0	2	2	0.20377	2.06794	2.05093	1.55973	2.33941	8.69599	2.34995	2.52615	1.40361	21.9677	23.4279	3.47244	6.13837	3.9033	5.10164	0.987022	1.28485	12.6083	8.22748	2.51747	3.03779	1.64797	1.88375
ENST00000609837.1|ENSG00000273106.1|OTTHUMG00000185892.1|OTTHUMT00000471654.1|PPM1B-DT-201|PPM1B-DT|1235	1.235	0	0	1	1	0	0	2	1.61943	0.243174	0.17909	0.202328	0.13089	0.127644	0.37013	0.0735347	0.0406369	2.69814	2.13479	0.46645	0.872865	0.0660637	0.691177	0.229464	0.102291	5.40022	3.44361	0.383278	0.358416	0.155208	0.061369
ENST00000610061.1|ENSG00000272871.1|OTTHUMG00000185911.1|OTTHUMT00000471693.1|ENST00000610061|ENSG00000272871|1269	1.269	0	0	0	0	0	2	2	1.57604	0.269509	0.115786	0.239498	0.190143	2.22525	0.597135	0.0710123	0.117726	0.864551	0.821117	1.56838	1.78207	2.03332	0.83005	0.343692	0.0495671	7.3469	5.8201	9.56126	8.19642	3.94673	4.06985
ENST00000610122.1|ENSG00000234432.4|OTTHUMG00000186131.1|OTTHUMT00000472302.1|LINC02983-201|LINC02983|2651	2.651	0	0	1	1	0	0	2	0.754432	0.120895	0.0909341	0.190924	0.166652	0.27113	0.648731	0.0296591	0.0163845	0.839647	0.694601	0.0574895	0.080817	0.0497963	0.0639516	1.09465	0.637605	10.4236	5.11082	1.22221	0.505098	0.676152	0.525793
ENST00000610185.2|ENSG00000273355.2|OTTHUMG00000186207.1|OTTHUMT00000472418.1|ENST00000610185|ENSG00000273355|1370	1.37	1	0	0	0	0	1	2	1.45985	3.40027	2.47027	4.91754	5.85312	10.9659	11.2328	5.49628	5.10429	29.4634	34.1486	2.67496	3.00434	3.13874	2.30439	1.35202	1.58916	12.7585	5.20601	2.23187	0.925549	1.928	1.69207
ENST00000610263.1|ENSG00000272817.1|OTTHUMG00000186460.1|OTTHUMT00000473189.1|ENST00000610263|ENSG00000272817|571	0.571	0	0	1	1	0	0	2	3.50263	0.177679	0.102095	0	0.0898653	0	0.174144	0	0	0	0	0	0	0	0	0.426818	0.828645	0	0	0	0.16533	0.437181	0
ENST00000610658.2|ENSG00000277182.2|OTTHUMG00000188502.1|OTTHUMT00000477453.1|ENST00000610658|ENSG00000277182|2414	2.414	0	0	0	0	0	2	2	0.8285	0.600846	0.545177	0.982403	1.44461	2.40009	3.01724	0.611922	0.970814	6.61302	3.87844	1.31752	0.993533	2.16818	1.67998	0.515767	0.559031	2.9606	1.52806	0.497539	0.415981	0.378419	0.561952
ENST00000610945.1|ENSG00000277895.1|OTTHUMG00000168795.1|OTTHUMT00000401129.1|ENST00000610945|ENSG00000277895|1311	1.311	0	0	1	1	0	0	2	1.52555	0.259803	0.251143	0.167655	0.488034	0.951972	0.746747	0.301699	0.451752	3.81599	2.35176	0.427352	0.399928	0.364074	0.158331	0.545312	0.14324	1.85394	2.14353	0.140081	0.197103	0	0.225123
ENST00000611178.1|ENSG00000274937.1|OTTHUMG00000186953.1|OTTHUMT00000474090.1|ENST00000611178|ENSG00000274937|834	0.834	0	0	0	1	1	0	2	2.39808	0	0	0	0.053127	0	0	0	0	0	0	0	0	0	0	0.0333874	0.0819088	0	0.268834	0	0.137965	0	0
ENST00000611182.1|ENSG00000276071.1|OTTHUMG00000186726.2|OTTHUMT00000473676.2|ENST00000611182|ENSG00000276071|1303	1.303	0	2	0	0	0	0	2	1.53492	0.0326997	0	0.126645	0.337937	1.79777	0.289307	0	0	0.832317	0.790743	0.431157	0.10087	0.183612	0.0798692	0.725662	0.192333	14.3411	11.0684	1.48434	1.72336	1.28832	2.04394
ENST00000611275.6|ENSG00000233396.9|OTTHUMG00000042244.6|OTTHUMT00000100475.4|LINC01719-204|LINC01719|2067	2.067	1	0	0	0	0	1	2	0.967586	NA	NA	NA	NA	NA	NA	NA	NA	NA	NA	NA	NA	NA	NA	NA	NA	NA	NA	NA	NA	NA	NA
ENST00000611423.2|ENSG00000277383.2|OTTHUMG00000186770.1|OTTHUMT00000473745.1|ENST00000611423|ENSG00000277383|809	0.809	1	0	0	1	0	0	2	2.47219	0.570117	0.685418	1.10044	1.27134	0	1.68532	1.11673	2.88052	12.7128	6.55175	1.27657	0.89366	0.920014	2.65552	1.17932	0.595699	10.258	5.14427	0.814319	0.58562	0.985859	0.746359
ENST00000611923.1|ENSG00000278713.1|OTTHUMG00000186861.1|OTTHUMT00000473926.1|ENST00000611923|ENSG00000278713|658	0.658	1	0	0	1	0	0	2	3.03951	0	0	0	0	0	0	0	0	0	0	0	0	0	0	0	0	0	0	0	0	0	0.391239
ENST00000612013.2|ENSG00000276728.2|OTTHUMG00000186651.1|OTTHUMT00000473533.1|ENST00000612013|ENSG00000276728|1745	1.745	1	0	0	0	1	0	2	1.14613	0.994044	1.30183	1.58634	1.62681	6.1778	7.0098	0.246722	0.388754	9.39009	8.72151	0.963385	1.48859	0.662505	1.0177	1.42628	0.796083	19.1739	13.4323	2.01754	0.756426	0.760852	0.534739
ENST00000612267.1|ENSG00000273840.1|OTTHUMG00000188252.1|OTTHUMT00000476770.1|ENST00000612267|ENSG00000273840|3336	3.336	0	1	0	0	0	1	2	0.59952	1.25748	1.12384	0.6902	0.444089	10.7867	1.89191	1.29206	0.381999	0.533458	0.674537	0.54082	0.494377	1.20146	0.901815	0	0	0	0	0	0	0	0
ENST00000612344.1|ENSG00000276399.1|OTTHUMG00000180381.3|OTTHUMT00000451067.3|FLJ36000-201|FLJ36000|3801	3.801	0	0	0	0	0	2	2	0.526177	0.602855	0.509302	0.518694	0.658365	2.02542	2.04278	0.159016	0.529462	0.532809	0.379916	0.703834	1.09267	0.604018	0.877118	0	0	0	0	0	0	0	0
ENST00000612438.1|ENSG00000275226.1|OTTHUMG00000187339.1|OTTHUMT00000474784.1|LINC00547-201|LINC00547|3314	3.314	0	0	0	0	0	2	2	0.6035	0.0119505	0	0	0.00833388	0.0223516	0	0	0	0	0	0	0	0	0	0	0	0	0	0	0	0	0
ENST00000612545.1|ENSG00000275383.1|OTTHUMG00000177420.1|OTTHUMT00000436855.1|ENST00000612545|ENSG00000275383|3043	3.043	0	0	0	0	0	2	2	0.657246	0	0	0	0.0479253	0.106327	0.0223626	0.00363637	0.00469219	0.0357766	0.182217	0	0	0.0212351	0.0544557	0.0234454	0.0760514	1.33765	0.430636	0.495808	0.928271	0.119749	0.27268
ENST00000612566.1|ENSG00000274528.1|OTTHUMG00000186862.1|OTTHUMT00000473927.1|ENST00000612566|ENSG00000274528|866	0.866	0	0	1	0	1	0	2	2.30947	1.45865	0.730773	0.436292	0.330262	2.53334	0.942628	1.91174	1.09812	0.922123	3.08126	1.46411	0.36157	1.92351	3.73272	0.784979	0.340615	1.43754	2.85579	0.224557	0.679863	0.450644	0.558639
ENST00000612584.1|ENSG00000275431.1|OTTHUMG00000188404.1|OTTHUMT00000477124.1|ENST00000612584|ENSG00000275431|3878	3.878	0	0	0	0	0	2	2	0.51573	0	0	0	0	0	0	0	0	0	0	0	0	0	0	0	0	0	0	0	0	0	0
ENST00000612833.1|ENSG00000276337.1|OTTHUMG00000187080.1|OTTHUMT00000474383.1|ENST00000612833|ENSG00000276337|4001	4.001	0	2	0	0	0	0	2	0.499875	0.00674892	0.0747316	1.68895	1.47602	9.07201	5.46888	0.109303	0.0297892	0	0	1.30706	1.89894	0.455443	0.744372	0	0.0330087	1.35138	2.28434	1.82086	2.33658	0.926403	1.07954
ENST00000613093.2|ENSG00000274292.2|OTTHUMG00000169079.2|OTTHUMT00000402182.2|ENST00000613093|ENSG00000274292|3034	3.034	0	0	1	1	0	0	2	0.659196	0.379324	0.534621	0.627511	0.66768	3.36717	2.23673	0.0547236	0.103764	3.87104	3.71641	0.57362	0.655898	0.658728	0.788554	0.73252	0.17144	10.9073	5.43321	0.496107	0.452838	1.07613	1.45196
ENST00000613291.1|ENSG00000274979.1|OTTHUMG00000187272.1|OTTHUMT00000474676.1|ENST00000613291|ENSG00000274979|5309	5.309	0	0	0	0	0	2	2	0.376719	0.0736441	0.0757505	0.16981	0.320423	0.964746	0.360491	0.523629	0.0772758	1.77608	2.75468	0.105338	0.462875	0.0803288	0.234427	4.31389	1.98633	131.297	129.678	24.9085	47.513	12.3821	14.7374
ENST00000613921.1|ENSG00000277449.1|OTTHUMG00000186944.1|OTTHUMT00000474072.1|CEBPB-AS1-201|CEBPB-AS1|2648	2.648	1	0	0	1	0	0	2	0.755287	0.299907	0.254892	0	0	0	0.0621378	0	0.0753139	0	0	0.0575664	0.356527	0.0199036	0	0.0268916	0.0909775	0.269603	0	0	0.0361372	0.039214	0
ENST00000614289.1|ENSG00000278254.4|OTTHUMG00000189027.1|OTTHUMT00000478445.1|ENST00000614289|ENSG00000278254|2218	2.218	1	0	0	0	0	1	2	0.901713	0	0	0	0	0	0.0128231	0	0	0	0	0	0	0	0	0	0	0	0	0	0	0	0
ENST00000615012.1|ENSG00000203804.5|OTTHUMG00000034866.2|OTTHUMT00000084401.1|ADAMTSL4-AS1-201|ADAMTSL4-AS1|1914	1.914	1	0	0	1	0	0	2	1.04493	0.043192	0.0183991	0.196537	0.184247	1.1171	1.2294	0	0	4.87219	4.21312	1.12325	1.98611	0.296468	0.853367	0.0562488	0	3.81959	5.4042	1.24513	2.26892	0.160677	0.710101
ENST00000615095.1|ENSG00000260469.3|OTTHUMG00000172684.4|OTTHUMT00000474086.1|INSYN1-AS1-202|INSYN1-AS1|1224	1.224	0	0	0	1	0	1	2	1.63399	NA	NA	NA	NA	NA	NA	NA	NA	NA	NA	NA	NA	NA	NA	NA	NA	NA	NA	NA	NA	NA	NA
ENST00000615251.1|ENSG00000275198.1|OTTHUMG00000187067.1|OTTHUMT00000474363.1|LINC02960-201|LINC02960|4609	4.609	0	0	1	0	0	1	2	0.433934	0.229064	0.160471	0.170127	0.193327	0.694687	0.288148	0.127688	0.125672	1.21466	1.00346	0.199671	0.0647879	0.120369	0.256353	0.116412	0.135237	1.67715	0.701762	0.295239	0.270112	0.0599179	0.110161
ENST00000615357.1|ENSG00000277550.1|OTTHUMG00000186833.1|OTTHUMT00000473868.1|ENST00000615357|ENSG00000277550|1438	1.438	1	0	0	0	0	1	2	1.39082	0	0	0	0	0	0	0	0	0	0	0	0	0	0	0	0	0	0	0	0	0	0
ENST00000615941.1|ENSG00000276740.1|OTTHUMG00000187292.1|OTTHUMT00000474719.1|ENST00000615941|ENSG00000276740|691	0.691	0	0	0	0	1	1	2	2.89436	0.043963	0.00119295	0	0	0	0	0.020931	0	0	0	0	0	0	0	0.0422798	0	0	0	0	0	0	0
ENST00000615979.1|ENSG00000275155.1|OTTHUMG00000186926.1|OTTHUMT00000474024.1|ENST00000615979|ENSG00000275155|615	0.615	0	1	0	0	0	1	2	3.25203	0	0	0	0	0	0	0	0	0	0	0	0	0	0	0	0	0	1.09421	0	0.26558	0	0
ENST00000616682.1|ENSG00000277559.1|OTTHUMG00000186932.1|OTTHUMT00000474041.1|ENST00000616682|ENSG00000277559|1458	1.458	1	0	0	0	0	1	2	1.37174	0	0	0	0	0	0	0	0	0	0	0	0	0	0	0.621329	0.67694	3.89515	3.034	1.14043	1.01825	0.60803	0.87304
ENST00000616822.1|ENSG00000273792.1|OTTHUMG00000186917.1|OTTHUMT00000474007.1|ENST00000616822|ENSG00000273792|1312	1.312	0	0	0	0	1	1	2	1.52439	0	0	0.08244	0.0886202	0.229465	0.399242	0	0	2.15856	1.04063	0.495702	0.396423	0.0594399	0.469468	0	0	0	0	0	0	0	0
ENST00000616950.1|ENSG00000275210.1|OTTHUMG00000065356.2|OTTHUMT00000140230.2|ENST00000616950|ENSG00000275210|1734	1.734	0	0	1	0	0	1	2	1.1534	0	0	0	0	0	0	0	0	0	0	0	0	0	0	0	0	0	0	0	0	0	0
ENST00000617627.1|ENSG00000276308.1|OTTHUMG00000187123.1|OTTHUMT00000474456.1|ENST00000617627|ENSG00000276308|1749	1.749	0	0	0	0	0	2	2	1.14351	0	0	0.0150692	0	0.0856463	0	0	0	0	0	0	0	0	0	0	0	0	0	0	0	0	0
ENST00000618067.1|ENSG00000275720.1|OTTHUMG00000188444.1|OTTHUMT00000477269.1|ENST00000618067|ENSG00000275720|630	0.63	1	0	0	0	0	1	2	3.1746	0	0.133962	0.373654	0.933593	1.21075	1.49893	0.370911	0.588685	0.39702	0.491678	0	0	0	0.316501	0.096148	0	0.848035	0.520852	1.54314	0.781331	0.619419	0.218857
ENST00000618276.1|ENSG00000274993.1|OTTHUMG00000157043.3|OTTHUMT00000347239.2|ENST00000618276|ENSG00000274993|2112	2.112	0	0	1	1	0	0	2	0.94697	0	0	0	0	0.277705	0.0712778	0	0	0	0	0	0	0	0	0	0	0	0	0	0.0349553	0	0
ENST00000618330.3|ENSG00000275120.3|OTTHUMG00000191692.2|OTTHUMT00000489458.2|ENST00000618330|ENSG00000275120|3668	3.668	0	0	0	0	0	2	2	0.545256	0.0378625	0.0211785	0	0	0	0.0953946	0.0140213	0.0381277	0	0.0406772	0.015982	0	0.000903461	0	0.0733281	0.13034	0.352288	0	0.0225983	0.113946	0.112339	0.0982926
ENST00000618791.1|ENSG00000276251.1|OTTHUMG00000186711.1|OTTHUMT00000473658.1|ENST00000618791|ENSG00000276251|803	0.803	0	0	1	0	0	1	2	2.49066	0	0	0.0383177	0.0558121	0	0.106393	0	0	0	0.288935	0	0	0	0.17969	0	0	0	0	0	0	0	0.126219
ENST00000618835.1|ENSG00000278600.1|OTTHUMG00000176726.2|OTTHUMT00000433312.2|ENST00000618835|ENSG00000278600|2261	2.261	0	0	0	0	0	2	2	0.884564	2.67729	2.43857	5.14326	8.90825	22.8403	9.70925	6.15287	1.72046	19.9636	20.8755	7.18089	13.827	9.21229	16.5144	1.48289	1.0012	6.2978	5.73984	3.9461	2.95001	2.76722	2.63028
ENST00000618845.1|ENSG00000278002.1|OTTHUMG00000186829.1|OTTHUMT00000473857.1|ENST00000618845|ENSG00000278002|1308	1.308	0	0	0	0	0	2	2	1.52905	0.618623	0.391674	1.07167	1.77388	3.10221	2.47674	0.380662	0.226534	7.24306	8.25788	0.714618	0.601879	0.669624	0.476567	0.0390532	0	5.16708	3.16281	0.281121	0.197754	0.0711666	0.0564655
ENST00000618896.1|ENSG00000274331.1|OTTHUMG00000187260.1|OTTHUMT00000474657.1|ENST00000618896|ENSG00000274331|1708	1.708	0	0	0	0	0	2	2	1.17096	0	0	0	0	0	0	0	0	0	0	0	0	0	0	0	0	0	0	0	0	0	0
ENST00000619086.1|ENSG00000276900.1|OTTHUMG00000187205.1|OTTHUMT00000474575.1|ENST00000619086|ENSG00000276900|2088	2.088	1	0	0	0	0	1	2	0.957854	5.10826	5.49569	9.19671	9.95925	54.205	27.0399	5.77699	3.45871	29.0737	19.3345	8.3617	5.82062	9.10203	6.52694	0.545306	0.299503	7.73579	5.34104	0.818651	1.09902	0.565917	1.61438
ENST00000619319.1|ENSG00000273759.1|OTTHUMG00000187000.1|OTTHUMT00000474224.1|ENST00000619319|ENSG00000273759|677	0.677	1	0	0	0	0	1	2	2.95421	0.80547	0.19053	0	0	10.7138	3.72581	2.99226	0.448716	14.197	16.7533	16.7109	17.359	11.1706	13.903	0.408647	0	12.6283	13.1441	5.7901	10.5914	4.0446	5.39254
ENST00000619354.1|ENSG00000274698.1|OTTHUMG00000177998.2|OTTHUMT00000474139.1|ENST00000619354|ENSG00000274698|2036	2.036	0	0	0	0	0	2	2	0.982318	0	0	0	0	0	0	0	0	0	0	0	0.0556102	0	0	0.0119238	0	0	0	0	0.0365795	0.0389478	0
ENST00000619681.1|ENSG00000177725.6|OTTHUMG00000186797.1|OTTHUMT00000473801.1|ENST00000619681|ENSG00000177725|2371	2.371	0	1	0	0	1	0	2	0.843526	0.0734943	0.0318034	0.422756	0	3.92477	11.5098	0	0	2.49055	1.85839	0	0.00904886	0	0	0	0	0.370153	0.343543	0	0	0	0
ENST00000620011.4|ENSG00000290359.1|-|OTTHUMT00000393312.2|GOLGA8DP-208|GOLGA8DP|5241	5.241	0	1	0	0	0	1	2	0.381607	0.00743523	0.0127859	0	0	0	0	0	0	0	0	0	0	0	0	0	0	0	0	0	0	0	0
ENST00000620414.1|ENSG00000277534.1|OTTHUMG00000186526.1|OTTHUMT00000473291.1|ENST00000620414|ENSG00000277534|2821	2.821	0	0	0	0	0	2	2	0.708968	0.0125851	0	0.00792746	0	0	0.0236125	0	0	0	0.0466507	0	0	0.0211456	0.0818538	1.89033	2.26294	6.35952	5.19097	2.67829	2.21587	0.75832	0.706795
ENST00000620503.1|ENSG00000273906.1|OTTHUMG00000188136.1|OTTHUMT00000476255.1|ENST00000620503|ENSG00000273906|2110	2.11	0	0	0	0	0	2	2	0.947867	0	0	0	0.0505914	0	0.0316293	0	0	0	0	0	0.102004	0	0	2.95063	5.71273	5.11796	5.70983	8.70001	7.44243	5.72278	8.39566
ENST00000620734.1|ENSG00000273877.4|OTTHUMG00000188638.1|OTTHUMT00000477795.1|ENST00000620734|ENSG00000273877|1222	1.222	0	0	0	0	0	2	2	1.63666	0.0134355	0	0.0354168	0	0	0	0.0184155	0	0	0.0278469	0.181371	0	0.0346302	0.0724669	0	0	0	0	0	0	0	0
ENST00000621052.1|ENSG00000274827.4|OTTHUMG00000170514.4|OTTHUMT00000409457.2|LINC01297-202|LINC01297|4222	4.222	0	0	0	0	0	2	2	0.473709	0.0278674	0.023959	0.107686	0.0858064	0.369647	0.380098	0.00509877	0	0.0516469	0.142039	0.0827126	0	0.0698321	0.0336074	0	0	0	0	0.0162686	0	0	0
ENST00000621095.1|ENSG00000275088.1|OTTHUMG00000187070.1|OTTHUMT00000474368.1|ENST00000621095|ENSG00000275088|3306	3.306	0	0	0	2	0	0	2	0.604961	0	0	0	0	0.0428305	0.0204649	0	0	0	0	0	0	0	0	0	0.0173981	0.0640051	0	0	0	0	0.0177178
ENST00000621139.4|ENSG00000290399.1|-|OTTHUMT00000477038.1|ENST00000621139|ENSG00000290399|4494	4.494	1	0	0	0	0	1	2	0.445038	0.858723	0.764045	0.119233	0.259618	1.42117	0.581773	0.929217	0.397545	0.246774	0.624378	1.94071	2.90139	2.33541	3.65085	0.72969	0.459005	0.640335	1.55024	1.64555	2.81472	1.14252	2.26856
ENST00000621167.1|ENSG00000277324.1|OTTHUMG00000186552.1|OTTHUMT00000473330.1|ENST00000621167|ENSG00000277324|1683	1.683	0	0	1	1	0	0	2	1.18835	0.196973	0.253926	0.220295	0.228975	0.536183	0.42966	0.193206	0.295209	2.05627	1.67836	0.303029	0.63845	0.0433746	0.168473	0.0589908	0.144112	0.728585	0.624147	0.344693	0.233232	0.0998049	0.1201
ENST00000621462.4|ENSG00000215481.9|OTTHUMG00000150726.6|OTTHUMT00000474012.1|BCRP3-202|BCRP3|1021	1.021	1	0	0	0	0	1	2	1.95886	0.555224	0.408765	1.14085	1.47552	4.79464	8.90987	3.73965	2.9547	0.335533	1.14072	0.142788	0	0.977687	0.136795	0.191639	0.0648299	0	0	0	0	0.105607	0.227082
ENST00000621825.1|ENSG00000277935.1|OTTHUMG00000186750.1|OTTHUMT00000473714.1|ENST00000621825|ENSG00000277935|546	0.546	1	0	0	0	0	1	2	3.663	0	0	0	0	0	0	0	0	0	0	0	0	0	0	0	0	0	0	0	0	0	0
ENST00000621933.3|ENSG00000274536.9|OTTHUMG00000188128.2|OTTHUMT00000476244.1|MIR223HG-202|MIR223HG|1862	1.862	0	0	0	0	0	2	2	1.07411	6.94695	5.76531	2.13047	0.834374	26.8149	1.99728	122.703	34.6507	0	0.497486	7.62978	5.14003	3.50757	2.36617	0	0	0	0	0	0	0	0
ENST00000622091.1|ENSG00000179577.4|OTTHUMG00000186799.1|OTTHUMT00000473803.1|ENST00000622091|ENSG00000179577|1989	1.989	0	0	0	0	0	2	2	1.00553	0	0.0130505	0	0	0.0365592	0	0	0	0.0481085	0	0.209154	0.139848	0.0933903	0	0	0	0.0803257	0.0626076	0.0704503	0.0588823	0.0769872	0.0292883
ENST00000622229.1|ENSG00000232748.3|OTTHUMG00000187304.1|OTTHUMT00000474735.1|ENST00000622229|ENSG00000232748|3380	3.38	0	0	1	1	0	0	2	0.591716	0.0117304	0	0	0	0	0.0200032	0	0	0	1.24e-06	0.0217069	0.0610745	0.0188508	0.0482912	0	0	0	0.0381701	0.041825	7.78e-06	0.0424315	0.0171527
ENST00000622621.1|ENSG00000277954.1|OTTHUMG00000176937.2|OTTHUMT00000434358.2|ENST00000622621|ENSG00000277954|4116	4.116	0	0	0	0	0	2	2	0.485909	0	0	0	0	0	0	0	0	0	0	0	0	0	0	0	0	0	0	0	0	0	0
ENST00000622740.3|ENSG00000186960.14|OTTHUMG00000029410.9|OTTHUMT00000502116.2|LINC01551-205|LINC01551|6608	6.608	0	0	0	0	0	2	2	0.302663	0	0	0	0	0	0	0	0	0	0	0	0	0	0	0	0	0	0.0251932	0	0.0240538	0	0.0155312
ENST00000622829.4|ENSG00000290871.1|-|OTTHUMT00000464408.1|GTF2IP1-210|GTF2IP1|3605	3.605	0	0	1	1	0	0	2	0.554785	0	0	0	0	0	0	0	0	0	0	0	0	0	0	0	0	0.10989	0	0.059211	0.0587296	0	0
ENST00000622926.1|ENSG00000279881.1|OTTHUMG00000173473.1|OTTHUMT00000423228.1|ENST00000622926|ENSG00000279881|2899	2.899	0	0	0	0	1	1	2	0.689893	0	0	0	0	0	0	0.00383614	0.014834	0	0	0	0	0	0	0	0	0	0	0	0	0	0
ENST00000622931.1|ENSG00000280248.1|OTTHUMG00000177591.1|OTTHUMT00000437954.1|ENST00000622931|ENSG00000280248|2161	2.161	0	0	1	0	0	1	2	0.925497	0.0271791	0	0.176263	0.242545	0	0.420781	0.0120612	0.0357922	0.152711	0	0	0	0.0529547	0	0	0	0	0	0	0	0	0
ENST00000622965.1|ENSG00000279551.1|OTTHUMG00000169397.1|OTTHUMT00000403870.1|ENST00000622965|ENSG00000279551|1396	1.396	0	0	0	0	0	2	2	1.43266	0	0	0	0.0472952	0	0.0482615	0	0	0	0	0	0	0	0	0	0	0	0	0	0	0	0
ENST00000622975.1|ENSG00000279218.1|OTTHUMG00000176295.1|OTTHUMT00000431731.1|ENST00000622975|ENSG00000279218|2232	2.232	0	0	0	0	1	1	2	0.896057	0	0	0	0	0	0	0	0	0	0	0	0	0	0	0	0	0	0	0	0	0	0
ENST00000622998.1|ENSG00000279462.1|OTTHUMG00000168521.1|OTTHUMT00000400046.1|ENST00000622998|ENSG00000279462|982	0.982	0	1	0	0	0	1	2	2.03666	0	0	0	0	0	0	0	0	0	0	0	0	0	0	0	0	0	0	0	0	0	0
ENST00000623027.1|ENSG00000279440.1|OTTHUMG00000189177.1|OTTHUMT00000478999.1|ENST00000623027|ENSG00000279440|5182	5.182	1	0	0	0	0	1	2	0.385951	0	0	0.0047063	0.00684593	0	0	0	0	0	0	0	0	0	0.0451232	0	0	0	0	0	0.0250256	0	0
ENST00000623035.1|ENSG00000279404.1|OTTHUMG00000182767.1|OTTHUMT00000463535.1|ENST00000623035|ENSG00000279404|1938	1.938	0	0	0	1	0	1	2	1.03199	0	0	0	0	0	0	0	0	0	0	0	0	0	0	0	0	0	0	0	0	0	0
ENST00000623122.1|ENSG00000278916.1|OTTHUMG00000170256.1|OTTHUMT00000408214.1|CEP83-DT-201|CEP83-DT|2482	2.482	0	0	0	1	0	1	2	0.805802	0.680593	0.59897	0.727756	0.790341	3.02759	1.64473	0.99449	1.27016	9.25662	7.90964	0.621657	0.917362	0.37658	0.968102	0.115528	0.235917	1.25272	0.87576	0.300656	0.114969	0.0914729	0.19769
ENST00000623125.1|ENSG00000280219.1|OTTHUMG00000161357.1|OTTHUMT00000364643.1|ENST00000623125|ENSG00000280219|8092	8.092	0	0	0	0	0	2	2	0.247158	0	0	0	0	0	0	0	0	0	0	0	0	0	0	0	0	0.0241202	0	0	0	0	0
ENST00000623126.1|ENSG00000279174.1|OTTHUMG00000178227.1|OTTHUMT00000441044.1|ENST00000623126|ENSG00000279174|3052	3.052	0	1	1	0	0	0	2	0.655308	0	0	0	0.0119412	0	0	0	0	0	0	0	0	0	0	0	0	0.0701625	0	0	0.0225639	0	0
ENST00000623157.1|ENSG00000279778.1|OTTHUMG00000175865.1|OTTHUMT00000431198.1|ENST00000623157|ENSG00000279778|3087	3.087	0	0	0	0	0	2	2	0.647878	0.485935	0.398607	0.243917	0.488646	1.62553	0.316292	0.0245593	0.172802	0	0.0177437	0.0578414	0.0626713	0	0.378535	0.0381191	0.0166321	0	0.0385705	0	0	0.0360957	0
ENST00000623177.1|ENSG00000278949.1|OTTHUMG00000168025.1|OTTHUMT00000397575.1|ENST00000623177|ENSG00000278949|2104	2.104	0	0	0	0	0	2	2	0.95057	0.0763245	0.0705056	7.14503	8.3711	77.895	66.1142	0.0230043	0.175097	3.67416	2.3625	1.37709	1.5726	2.22476	1.19097	0.0746769	0	0.753772	0.48323	0.215052	0.669029	0.450541	0.645411
ENST00000623179.1|ENSG00000279407.1|OTTHUMG00000182133.1|OTTHUMT00000459664.1|ENST00000623179|ENSG00000279407|2995	2.995	1	1	0	0	0	0	2	0.66778	1.4149	1.03439	0.0755524	0.406417	4.6438	0	2.00503	0.525934	9.38112	9.83107	10.8564	8.59592	5.17458	6.32658	1.22758	0.853356	11.0751	6.6232	4.59101	4.20863	1.90173	1.77806
ENST00000623195.1|ENSG00000280281.1|OTTHUMG00000172921.1|OTTHUMT00000421358.1|ENST00000623195|ENSG00000280281|3585	3.585	0	0	0	0	0	2	2	0.55788	0	0	0.0166625	0.0220833	0	0	0.00269057	0	0	0	0	0	0	0	0	0	0.0583777	0.178517	0.0391071	0.0563626	0.0198381	0.0970111
ENST00000623212.1|ENSG00000278935.1|OTTHUMG00000175828.1|OTTHUMT00000431140.1|ENST00000623212|ENSG00000278935|4637	4.637	0	0	1	1	0	0	2	0.431313	0	0	0	0	0	0	0	0	0	0	0	0	0	0	0	0	0	0	0	0	0	0
ENST00000623223.1|ENSG00000278905.1|OTTHUMG00000162645.2|OTTHUMT00000369888.2|ENST00000623223|ENSG00000278905|3242	3.242	0	1	1	0	0	0	2	0.616903	0	0	0	0	0	0	0	0	0	0	0	0	0	0	0	0	0	0.0400319	0	0	0	0
ENST00000623243.1|ENSG00000280228.1|OTTHUMG00000176146.1|OTTHUMT00000431567.1|ENST00000623243|ENSG00000280228|3868	3.868	0	0	0	0	0	2	2	0.517063	0.030517	0.00874547	0.485453	0.901255	4.0642	1.3339	0.0336091	0	0.354739	0.973496	0.130516	0.629124	0.129716	0.311175	0.0542044	0.0885359	1.82232	1.01616	0.933082	1.13878	0.473359	0.222769
ENST00000623329.1|ENSG00000280197.1|OTTHUMG00000180217.1|OTTHUMT00000450296.1|ZBTB7C-AS2-201|ZBTB7C-AS2|537	0.537	0	0	0	0	1	1	2	3.72439	0	0	0	0	0	0	0	0	0	0	0	0	0	0	0	0	0	0	0	0	0	0
ENST00000623330.1|ENSG00000280367.1|OTTHUMG00000167306.1|OTTHUMT00000394123.1|ENST00000623330|ENSG00000280367|3386	3.386	0	0	0	0	0	2	2	0.590667	0.151905	0.180821	0.661577	1.0586	4.59345	1.09724	1.07081	0.412807	5.73395	6.29456	1.45116	3.10572	0.620835	2.89164	0.0415459	0.0339314	3.0519	1.56182	0.229571	0.300596	0.0635181	0.120708
ENST00000623333.1|ENSG00000279771.1|OTTHUMG00000168213.2|OTTHUMT00000398855.2|ENST00000623333|ENSG00000279771|2250	2.25	0	0	1	1	0	0	2	0.888889	0	0	0	0	0	0	0	0	0	0	0	0	0	0	0	0	0	0	0	0	0	0
ENST00000623342.1|ENSG00000279078.1|OTTHUMG00000189460.1|OTTHUMT00000479729.1|SND1-IT1-201|SND1-IT1|2481	2.481	0	0	0	0	1	1	2	0.806127	0	0	13.5562	28.3011	95.0926	25.2729	0	0.076982	0	0	10.5318	11.7351	2.11842	3.22711	0.00759008	0.137198	0	4.02158	2.97967	5.25544	0.146528	0.256715
ENST00000623345.1|ENSG00000279368.1|OTTHUMG00000175895.1|OTTHUMT00000431247.1|ENST00000623345|ENSG00000279368|1837	1.837	1	0	0	0	0	1	2	1.08873	0	0	0	0	0.162025	0.0778139	0	0	0	0	0	0	0	0	0	0	0	0	0	0	0	0
ENST00000623360.1|ENSG00000176753.5|OTTHUMG00000172399.2|OTTHUMT00000418370.2|PAK6-AS1-202|PAK6-AS1|2129	2.129	0	0	1	1	0	0	2	0.939408	0	0	0	0	0	0	0	0	0	0	0	0	0	0	0	0.0278369	0	0	0	0	0	0
ENST00000623362.1|ENSG00000279595.1|OTTHUMG00000186724.1|OTTHUMT00000473673.1|ENST00000623362|ENSG00000279595|4637	4.637	0	0	1	1	0	0	2	0.431313	0	0	0	0	0	0	0	0	0	0	0	0	0	0	0	0	0	0	0	0	0	0
ENST00000623374.1|ENSG00000277991.4|OTTHUMG00000189411.1|OTTHUMT00000479629.1|ENST00000623374|ENSG00000277991|7632	7.632	0	0	1	0	0	1	2	0.262055	0	0	0	0	0	0	0	0	0	0	0	0	0	0	0	0	0	0	0	0	0	0
ENST00000623412.1|ENSG00000279894.1|OTTHUMG00000175537.1|OTTHUMT00000430439.1|ENST00000623412|ENSG00000279894|2297	2.297	0	0	0	0	0	2	2	0.870701	0.0175975	0.0302527	0	0.0325309	0.0634424	0	0	0	0.2489	0.189952	0.34121	0.335646	0.206447	0.380481	0.104632	0.025641	3.53737	3.60654	1.22267	1.38802	0.368599	0.433824
ENST00000623486.1|ENSG00000279583.1|OTTHUMG00000177640.1|OTTHUMT00000438197.1|ENST00000623486|ENSG00000279583|1008	1.008	1	0	0	1	0	0	2	1.98413	0	0.19666	5.13576	4.42322	54.941	37.578	0.144467	0.39337	11.5419	5.84206	1.0276	3.58628	0.695226	0.495179	0.0626528	0.0509136	0	0	0	0	0	0
ENST00000623504.1|ENSG00000280355.1|OTTHUMG00000185656.1|OTTHUMT00000470939.1|ENST00000623504|ENSG00000280355|2122	2.122	0	0	0	0	0	2	2	0.942507	0.532124	0.394086	0.665614	0	6.10812	10.7543	1.03663	0.713172	0	0	0	0	1.6e-05	0	0.723229	0.745197	0	0	0	0	0	1.41175
ENST00000623510.1|ENSG00000279039.1|OTTHUMG00000175722.1|OTTHUMT00000430901.1|ENST00000623510|ENSG00000279039|2598	2.598	0	0	0	0	0	2	2	0.769823	0.0324445	0	0.509049	0.468037	2.68739	0.423213	0.00296827	0.011403	0.48602	0.377543	0.530526	0.685431	0.60956	0.545424	0	0	0	0	0.0284567	0	0	0
ENST00000623523.1|ENSG00000279387.1|OTTHUMG00000182001.1|OTTHUMT00000458600.1|ENST00000623523|ENSG00000279387|2076	2.076	0	0	0	0	1	1	2	0.963391	0	0	0.00941433	0.0107397	0.0490018	0	0	0	0	0	0	0	0	0	0	0	0	0	0	0	0	0
ENST00000623539.1|ENSG00000280385.1|OTTHUMG00000167661.2|OTTHUMT00000395464.2|ENST00000623539|ENSG00000280385|4507	4.507	0	0	0	0	0	2	2	0.443754	0.0173645	0.00746467	0.00544207	0.0395785	0	0	0	0	0.0922049	0.0293795	0.0629645	0.0442653	0.0274096	0.0700598	0.123267	0.0125832	5.02106	2.35138	1.31642	1.1947	0.491329	0.614642
ENST00000623545.1|ENSG00000279176.1|OTTHUMG00000169818.1|OTTHUMT00000406060.1|ENST00000623545|ENSG00000279176|1375	1.375	0	0	0	0	0	2	2	1.45455	0	0	0	0	0	0	0.00111207	0	0	0	0	0	0	0	0	0	0	0	0	0.039603	0	0
ENST00000623547.1|ENSG00000279026.1|OTTHUMG00000172970.1|OTTHUMT00000421547.1|ENST00000623547|ENSG00000279026|2225	2.225	0	0	0	0	1	1	2	0.898876	0	0	0.0115445	0.0335924	0.0655727	0	0	0	0	0.0657935	0	0.0498436	0	0.0394521	0.703895	0.371535	5.41458	6.24971	3.81517	4.72184	6.09902	6.96057
ENST00000623548.1|ENSG00000279636.2|OTTHUMG00000187383.1|OTTHUMT00000474864.1|LINC00216-201|LINC00216|1126	1.126	0	0	0	0	0	2	2	1.7762	0	0	0.0501975	0.0366586	0.717051	0.141207	0	0	0	0	0.0909696	0	0	0	0	0	0	0	0	0	0	0
ENST00000623557.1|ENSG00000280211.1|OTTHUMG00000176904.1|OTTHUMT00000434290.1|ENST00000623557|ENSG00000280211|2502	2.502	0	0	0	2	0	0	2	0.799361	0.160671	0.276228	0.182906	0.0886983	0.808071	1.35406	0.00452086	0.0699295	0.809022	1.20098	0.184719	0.0865356	0.133226	0.376702	0.171809	0.163727	2.30422	2.49371	0.0893259	0.170813	0.181182	0.14686
ENST00000623586.3|ENSG00000290438.1|-|OTTHUMT00000479335.1|ENST00000623586|ENSG00000290438|3260	3.26	0	0	0	0	0	2	2	0.613497	0	0	0	0	0	0	0	0	0	0	0	0	0	0	0	0	0	0	0	0	0	0
ENST00000623595.1|ENSG00000279489.1|OTTHUMG00000175586.1|OTTHUMT00000430558.1|ENST00000623595|ENSG00000279489|1751	1.751	0	0	1	0	0	1	2	1.1422	0.0500737	0.0405304	0.0601997	0.0218994	0.341892	0.247583	0	0.00879931	0.139532	0.0886044	0.191819	0.202086	0.206128	0.159974	0.0281363	0	0	0	0	0	0	0
ENST00000623627.1|ENSG00000279705.1|OTTHUMG00000176728.1|OTTHUMT00000433314.1|ENST00000623627|ENSG00000279705|1551	1.551	0	0	0	0	0	2	2	1.28949	0	0	0	0	0	0	0	0	0	0	0	0	0	0	0	0	0	0	0	0	0	0
ENST00000623655.2|ENSG00000280303.2|OTTHUMG00000164249.2|OTTHUMT00000377931.2|ERICD-201|ERICD|2003	2.003	1	0	0	0	0	1	2	0.998502	0.142672	0.192702	0.181414	0.150831	0.809581	0.741534	0.0641133	0.0901628	0.647452	0.598515	0.201979	0.0567567	0.139321	0.22463	0.327727	0.416467	2.91036	3.2762	0.392226	0.55999	0.198819	0.224487
ENST00000623657.1|ENSG00000279359.1|OTTHUMG00000187436.1|OTTHUMT00000474958.1|ENST00000623657|ENSG00000279359|4412	4.412	0	0	0	0	1	1	2	0.453309	0	0	0	0	0	0	0	0	0	0	0	0	0	0.03586	0	0	0	0	0	0	0	0
ENST00000623673.1|ENSG00000221990.5|OTTHUMG00000162235.1|OTTHUMT00000368033.1|EXOC3-AS1-201|EXOC3-AS1|1663	1.663	0	0	1	1	0	0	2	1.20265	2.97238	2.44866	1.05264	0.905646	2.7173	3.8765	1.36471	2.03114	16.1121	14.205	1.4366	2.95464	1.0572	1.99672	2.71248	2.81155	12.732	7.24721	2.35191	1.2794	4.56395	2.64319
ENST00000623701.1|ENSG00000279266.1|OTTHUMG00000170883.1|OTTHUMT00000410857.1|ENST00000623701|ENSG00000279266|3736	3.736	0	0	1	1	0	0	2	0.535332	0	0	0	0	0	0	0	0	0	0	0	0	0	0	0	0	0	0	0.0186604	0.0358741	0	0.0154379
ENST00000623729.1|ENSG00000280189.1|OTTHUMG00000173484.2|OTTHUMT00000423251.2|ENST00000623729|ENSG00000280189|2620	2.62	0	0	0	0	0	2	2	0.763359	0	0	0	0.00405043	0	0.00341752	0	0	0	0.0832332	0	0.02283	0	0.0221534	0	0	0	0	0	0	0	0
ENST00000623762.1|ENSG00000279555.1|OTTHUMG00000178399.1|OTTHUMT00000441831.1|ENST00000623762|ENSG00000279555|2098	2.098	0	1	0	0	1	0	2	0.953289	0.478166	0.405753	3.35086	8.53096	10.3422	3.67577	0	0	1.93133	2.64546	2.19446	3.0637	0.317729	2.95658	0.614109	0.128502	7.31002	2.56829	1.63828	1.53907	2.57157	0.319379
ENST00000623772.1|ENSG00000187013.4|OTTHUMG00000180077.1|OTTHUMT00000449646.1|LINC02875-201|LINC02875|1530	1.53	0	0	1	1	0	0	2	1.30719	0	0	0	0	0	0.0479344	0	0	0	0	0	0	0	0.127563	0.228871	0.0801466	4.80394	2.83848	0.112185	0.052964	0	0
ENST00000623774.1|ENSG00000278963.1|OTTHUMG00000177509.1|OTTHUMT00000437283.1|ENST00000623774|ENSG00000278963|2151	2.151	0	0	0	0	1	1	2	0.9298	0	0	6.36631	10.3106	16.2126	5.29945	0	0.00650634	4.02663	6.93732	0	0	1.12e-08	0	0.257604	0	0.634623	0	0	0	0.783569	0.796171
ENST00000623818.1|ENSG00000280257.1|OTTHUMG00000185631.1|OTTHUMT00000470887.1|ENST00000623818|ENSG00000280257|3495	3.495	1	0	0	0	0	1	2	0.572246	0	0	0	0	0	0	0	0	0	0	0	0	0	0	0	0	0	0	0	0	0	0
ENST00000623870.1|ENSG00000280054.1|OTTHUMG00000187439.1|OTTHUMT00000474974.1|ENST00000623870|ENSG00000280054|2448	2.448	0	0	0	1	0	1	2	0.816993	0	0	0	0.0605579	0	0.113199	0	0	0.0461258	0.0586855	0	0	0.0547533	0.03515	0	0	0	0	0	0	0	0
ENST00000623894.1|ENSG00000278993.1|OTTHUMG00000169528.1|OTTHUMT00000404633.1|ENST00000623894|ENSG00000278993|1828	1.828	1	0	1	0	0	0	2	1.09409	0.24142	0.407697	0.1306	0.0186905	0.350982	0.450276	0.17733	0.0516843	2.85732	1.78796	0.281183	0.528472	0.58853	0.0349081	0.231601	0.32355	1.75545	0.61418	0.740009	0.571921	0.355173	0.210758
ENST00000623967.1|ENSG00000280387.1|OTTHUMG00000186869.1|OTTHUMT00000473937.1|ENST00000623967|ENSG00000280387|1248	1.248	0	0	0	1	0	1	2	1.60256	0	0	0	0.00101148	0	0	0.00575724	0	0	0	0	0	0.039148	0	0.149918	0	0	0	0	0	0	0
ENST00000623972.1|ENSG00000279910.1|OTTHUMG00000175690.1|OTTHUMT00000430828.1|ENST00000623972|ENSG00000279910|4236	4.236	0	0	0	0	0	2	2	0.472144	0	0	0	0	0	0	0	0	0	0	0.0674177	0	0.0733382	0	0	0	0	0	0	0	0	0
ENST00000623994.1|ENSG00000280332.1|OTTHUMG00000182408.1|OTTHUMT00000461052.1|ENST00000623994|ENSG00000280332|1999	1.999	0	0	1	1	0	0	2	1.0005	0	0	0.0475888	0	0.327109	0	0.193864	0.0557582	0	0	0	0	0	0	0.140883	0	0	0	0	0.239257	0	0
ENST00000624004.1|ENSG00000279311.1|OTTHUMG00000175840.1|OTTHUMT00000431165.1|ENST00000624004|ENSG00000279311|1924	1.924	0	0	0	0	0	2	2	1.0395	0	0	0.135485	0.118291	0.230849	0.184678	0.00610831	0	0	0	1.48735	1.37318	1.57426	1.37053	0	0	0	0.14989	0.247782	1.29585	0.58609	0.57334
ENST00000624033.1|ENSG00000279985.1|OTTHUMG00000187224.1|OTTHUMT00000474603.1|ENST00000624033|ENSG00000279985|2322	2.322	0	0	0	0	0	2	2	0.861326	0	0	0	0	0	0	0	0	0	0	0.370438	0.757199	0.611375	0.561868	0	0	0.0969743	0.0593219	0.0978254	0.124542	0.0330667	0.0802871
ENST00000624034.1|ENSG00000196366.3|OTTHUMG00000131725.1|OTTHUMT00000254644.1|C9orf163-202|C9orf163|2573	2.573	0	0	0	2	0	0	2	0.777303	0.483517	0.549716	0.956291	0.9466	3.97602	7.96099	0.972584	1.14072	1.56539	1.32803	0.0893358	0.125558	0.128916	0.0993754	0.398324	0.113496	1.45711	1.73017	0.201521	0.055077	0.175185	0.189432
ENST00000624048.1|ENSG00000279283.1|OTTHUMG00000168248.1|OTTHUMT00000398962.1|ENST00000624048|ENSG00000279283|1740	1.74	0	0	0	2	0	0	2	1.14943	0.123486	0.0257891	2.14806	2.44036	22.6973	23.3121	0.0656978	0	4.54714	5.30273	0.0608206	0.632907	0.574182	1.60965	0.0654966	2.53e-05	5.3846	5.62238	0.561067	1.09617	0.716356	0.118848
ENST00000624049.1|ENSG00000278971.1|OTTHUMG00000178786.1|OTTHUMT00000443341.1|ENST00000624049|ENSG00000278971|1576	1.576	0	0	0	0	0	2	2	1.26904	0.380698	0.309273	0	0	0.28065	0.0271788	0	0	0.184612	0	0.0551911	0.0189504	0.0988566	0	0	0	0	0	0.0264046	0.172364	0.0334347	0.160671
ENST00000624058.1|ENSG00000278962.1|OTTHUMG00000176143.1|OTTHUMT00000431564.1|ENST00000624058|ENSG00000278962|2272	2.272	0	0	0	0	0	2	2	0.880282	0	0	0	0	0.064093	0	0.00504227	0	0	0	0	0	0	0	0.0211749	0.103782	1.39413	0.609172	0.904331	0.799179	1.08682	0.659401
ENST00000624115.1|ENSG00000279708.1|OTTHUMG00000173068.1|OTTHUMT00000422014.1|ENST00000624115|ENSG00000279708|1537	1.537	0	0	1	1	0	0	2	1.30124	0	0	0.0174408	0.050762	0	0.0953643	0	0	0.0827947	0	0	0	0	0	0	0	0	0	0	0	0	0
ENST00000624148.1|ENSG00000279089.1|OTTHUMG00000177540.1|OTTHUMT00000437460.1|ENST00000624148|ENSG00000279089|3213	3.213	0	0	0	0	0	2	2	0.622471	0.646234	0.674748	0.499168	0.119368	8.56455	0.116201	0.386118	0.0075051	3.41096	1.12742	9.88155	14.1923	11.3102	17.3511	1.01471	1.57305	2.90477	6.87323	7.13754	8.84878	5.05546	6.84753
ENST00000624154.1|ENSG00000279104.1|OTTHUMG00000173181.1|OTTHUMT00000422325.1|ENST00000624154|ENSG00000279104|1868	1.868	0	0	0	0	0	2	2	1.07066	0	0	0	0	0	0	0	0	0	0	0	0	0	0	0	0	0	0	0	0	0	0
ENST00000624173.1|ENSG00000279968.3|OTTHUMG00000189248.2|OTTHUMT00000479168.1|CCDC28A-AS1-202|CCDC28A-AS1|2685	2.685	0	0	0	0	0	2	2	0.744879	0.0340046	0.00965396	0	0	0	0	0.021718	0	0	0	0	0	0.0265626	0	0.241531	0.393048	0	0.0733857	0.122911	0.026588	0.0905883	0.126
ENST00000624212.1|ENSG00000279433.1|OTTHUMG00000179335.1|OTTHUMT00000445807.1|ENST00000624212|ENSG00000279433|2254	2.254	0	0	0	1	0	1	2	0.887311	0	0	0	0.0132001	0	0.0582193	0	0	0.0242745	0.0579324	0	0	0	0	0	0	0.0502647	0.210893	0.111527	0.550596	0.396952	0.212273
ENST00000624219.1|ENSG00000278890.1|OTTHUMG00000189268.1|OTTHUMT00000479249.1|ENST00000624219|ENSG00000278890|5630	5.63	0	0	0	0	0	2	2	0.35524	0	0	0	0	0.0490718	0	0	0	0	0	0	0	0	0	0	0	0	0	0	0	0	0
ENST00000624224.1|ENSG00000280418.1|OTTHUMG00000189175.1|OTTHUMT00000478997.1|ENST00000624224|ENSG00000280418|7579	7.579	0	0	1	1	0	0	2	0.263887	0	0	0	0	0	0	0	0	0	0	0	0	0	0	0	0	0	0	0	0	0	0
ENST00000624228.1|ENSG00000280079.1|OTTHUMG00000175724.1|OTTHUMT00000430903.1|ENST00000624228|ENSG00000280079|1590	1.59	0	0	0	0	0	2	2	1.25786	0.808884	0.659223	2.35142	4.29573	9.84121	3.07529	0.132234	1.2124	2.45398	2.51942	1.26954	2.04927	1.33875	2.18595	0	0	0	0	0	0	0.0516532	0
ENST00000624231.1|ENSG00000280225.1|OTTHUMG00000188289.1|OTTHUMT00000476822.1|ENST00000624231|ENSG00000280225|2537	2.537	0	0	0	1	0	1	2	0.788333	0	0	0	0	0	0	0	0	0	0	0	0	0	0	0	0	0	0	0	0	0	0
ENST00000624242.1|ENSG00000279666.1|OTTHUMG00000176026.1|OTTHUMT00000431399.1|ENST00000624242|ENSG00000279666|1800	1.8	0	1	0	0	1	0	2	1.11111	0	0	0	0	0	0.0398106	0	0	0	0	0	0	0	0	0	0	0	0	0	0.0427472	0.0456471	0
ENST00000624275.1|ENSG00000280078.1|OTTHUMG00000172976.1|OTTHUMT00000421578.1|ENST00000624275|ENSG00000280078|3931	3.931	0	0	0	0	1	1	2	0.508776	1.08033	0.765399	5.8027	9.2992	34.5705	8.12348	0.366077	0.170285	7.85299	9.18641	3.46098	4.37673	1.78382	3.99341	0.195423	0.0725449	1.57915	1.44865	1.02202	1.38956	0.500603	0.495947
ENST00000624286.1|ENSG00000279196.1|OTTHUMG00000176774.2|OTTHUMT00000433685.1|ENST00000624286|ENSG00000279196|3641	3.641	0	0	1	1	0	0	2	0.5493	0.0324983	0.0931313	0.163385	0.207955	1.00552	1.62523	0.0896939	0.0192678	0.291936	0.632243	0.339197	0.280508	0.138742	0.221993	0.0834101	0	0.573654	0.350841	0.326613	0.221555	0.0194924	0.0794481
ENST00000624347.1|ENSG00000279946.1|OTTHUMG00000184618.1|OTTHUMT00000468968.1|ENST00000624347|ENSG00000279946|3135	3.135	0	0	0	2	0	0	2	0.637959	0	0	0	0	0	0	0	0	0	0	0	0	0	0	0	0	0	0	0.0460157	0	0	0
ENST00000624348.1|ENSG00000279452.1|OTTHUMG00000175713.1|OTTHUMT00000430892.1|ENST00000624348|ENSG00000279452|1610	1.61	0	0	1	1	0	0	2	1.24224	0	0	0	0.0240753	0	0	0	0	0	0	0	0.0752271	0	0	0	0	0	0	0	0	0	0
ENST00000624363.1|ENSG00000279114.1|OTTHUMG00000185408.1|OTTHUMT00000470459.1|ENST00000624363|ENSG00000279114|6430	6.43	0	0	0	0	0	2	2	0.311042	0.354502	0.279648	0	0.0982942	0.173223	0.102093	0	0	0.412127	0.438115	0.0459806	0.371815	0.26604	0.192387	0	0	0.0436987	0	0.0901082	0.0259993	0	0
ENST00000624365.1|ENSG00000279942.1|OTTHUMG00000175913.1|OTTHUMT00000431266.1|ENST00000624365|ENSG00000279942|3745	3.745	0	0	0	1	1	0	2	0.534045	0	0	0	0	0	0.0179256	0	0	0	0	0	0	0	0	0	0	0	0	0	0.0357776	0	0
ENST00000624371.1|ENSG00000280190.1|OTTHUMG00000176929.1|OTTHUMT00000434350.1|ENST00000624371|ENSG00000280190|2072	2.072	0	0	0	0	0	2	2	0.965251	0	0.0195045	0	0	0.146509	0	0.00437023	0	0	0	0	0	0	0	0	0.0533823	0	0	1.31524	1.83643	0.47461	0.222404
ENST00000624372.1|ENSG00000279619.1|OTTHUMG00000182358.1|OTTHUMT00000460753.1|ENST00000624372|ENSG00000279619|1936	1.936	0	0	1	1	0	0	2	1.03306	0.0820548	0.0158922	0.301187	0.201871	0.834875	1.95737	0.0619588	0.0130004	0.0563763	0	0.021563	0.0528186	0.0197135	0.164555	0	0	0	0	0	0	0	0
ENST00000624376.1|ENSG00000279519.1|OTTHUMG00000175841.1|OTTHUMT00000431166.1|ENST00000624376|ENSG00000279519|2618	2.618	0	0	0	0	0	2	2	0.763942	0	0	0	0	0	0	0	0	0	0	0	0	0	0	0	0	0.00043556	0.66335	0	0	0	0
ENST00000624378.1|ENSG00000280162.1|OTTHUMG00000185844.1|OTTHUMT00000471488.1|ENST00000624378|ENSG00000280162|3658	3.658	0	0	0	0	0	2	2	0.546747	0	0.00926808	0	0.0295622	0.0769685	0.0183775	0.00297476	0.00383418	0	0	0	0	0	0.0220834	0	0	0	0	0	0	0	0
ENST00000624389.1|ENSG00000279086.1|OTTHUMG00000158457.1|OTTHUMT00000351094.1|ENST00000624389|ENSG00000279086|2278	2.278	0	0	1	1	0	0	2	0.877963	0.550381	0.488353	0.135018	0.196436	0.383454	0.214358	0.0552986	0.0972039	0.905062	0.831383	0.103401	0.145305	0.11915	0.191684	0.0211147	0	0.198521	0	0	0	0	0
ENST00000624442.1|ENSG00000280356.1|OTTHUMG00000189274.1|OTTHUMT00000479259.1|ENST00000624442|ENSG00000280356|10684	10.684	0	0	0	0	0	2	2	0.187196	0.00719015	0	0.0156714	0.0358163	0.0638404	0.0665884	0	0	0.0276532	0	0.0188472	0.00883578	0.0109805	0.00699166	0.0317957	0	0.0541018	0	0.0721916	0.0290909	0.0122133	0.00501355
ENST00000624455.1|ENSG00000280405.1|OTTHUMG00000168378.1|OTTHUMT00000399503.1|ENST00000624455|ENSG00000280405|738	0.738	0	0	1	0	0	1	2	2.71003	0	0	0	0	0	0	0	0	0	0	0	0	0	0	0	0	0	0	0	0	0	0
ENST00000624456.1|ENSG00000280169.1|OTTHUMG00000182528.1|OTTHUMT00000462186.1|ENST00000624456|ENSG00000280169|2203	2.203	0	0	0	0	0	2	2	0.907853	0.0184012	0	0.0116707	0.0339597	0.066289	0	0	0	0.523625	0.399535	0.215425	0.151358	0.15506	0.119803	0.0875691	0	1.96491	2.15543	0.488023	0.663815	0.0708723	0.142955
ENST00000624506.1|ENSG00000279186.1|OTTHUMG00000189486.1|OTTHUMT00000479786.1|ENST00000624506|ENSG00000279186|2456	2.456	0	0	0	0	0	2	2	0.814332	0.00546229	0.00469539	0	0.0150833	0.0196302	0	0.00153878	0.00198352	0.0153156	0.058459	0.0209845	0	0	0.011671	0.00973667	0.0159064	0.15103	0.0923858	0.0406019	0.0970195	0.0617637	0.0667277
ENST00000624514.1|ENSG00000279428.1|OTTHUMG00000180330.1|OTTHUMT00000450773.1|ENST00000624514|ENSG00000279428|3130	3.13	0	1	0	1	0	0	2	0.638978	0	0	0	0.0232486	0	0	0	0.00908821	0	0	0	0	0	0	0.0300897	0.0184317	0	0	0.0456981	0.0219192	0.069536	0
ENST00000624542.1|ENSG00000279633.1|OTTHUMG00000172946.1|OTTHUMT00000421429.1|ENST00000624542|ENSG00000279633|1922	1.922	0	0	0	0	0	2	2	1.04058	0.170485	0.0732655	0.0949487	0.414459	0.770385	0.369788	0.0305781	0.00788384	4.33814	5.74905	1.14889	2.3315	0.623187	1.84555	0.025396	0	0.981262	2.02619	0.620285	0.786399	0.377277	0.30393
ENST00000624546.1|ENSG00000279162.1|OTTHUMG00000177285.1|OTTHUMT00000436106.1|ENST00000624546|ENSG00000279162|2050	2.05	0	0	0	0	0	2	2	0.97561	0.117043	0	0.314729	1.86e-08	7.59804	6.58109	0	0.0340532	0	0	0	0	0	0.413567	0.124489	0	0	0	0	0.294781	0	0.119663
ENST00000624567.1|ENSG00000279957.1|OTTHUMG00000187434.1|OTTHUMT00000474952.1|ENST00000624567|ENSG00000279957|1173	1.173	0	0	0	0	0	2	2	1.70503	0	0	1.45721	0	12.5995	3.41189	0.00209939	0	19.9255	23.6425	0.979341	0	5.53255	0.277513	0	0	1.10653	0	3.30002	0	1.59722	0.454839
ENST00000624602.1|ENSG00000280161.1|OTTHUMG00000162253.1|OTTHUMT00000368194.1|ENST00000624602|ENSG00000280161|984	0.984	2	0	0	0	0	0	2	2.03252	2.25645	2.01581	0.917202	0.947732	1.67952	3.26451	1.39539	5.72898	10.0808	6.86259	1.78242	2.34291	1.86904	1.97956	0.572526	0.802375	11.3293	4.56016	1.55965	1.33262	0.901075	0.174988
ENST00000624610.1|ENSG00000279722.1|OTTHUMG00000173215.1|OTTHUMT00000422488.1|ENST00000624610|ENSG00000279722|2337	2.337	0	0	0	0	0	2	2	0.855798	0.0518292	0.0445514	0.459577	1.14621	3.10767	0.506165	0.0537142	0.0125891	2.04778	3.03901	0.367563	0.657412	0.144451	0.334506	0.318383	0.15101	4.04119	3.29613	1.39113	1.32845	0.52491	0.74356
ENST00000624641.2|ENSG00000279069.2|OTTHUMG00000178782.1|OTTHUMT00000443337.1|ENST00000624641|ENSG00000279069|2945	2.945	0	0	1	1	0	0	2	0.679117	0.974051	0.744966	1.06922	0.981797	3.29684	3.62552	0.814315	1.58415	3.86488	3.02841	1.02115	1.35771	0.771607	0.593828	2.01844	1.76933	13.4552	9.43743	3.13984	2.98611	1.16947	0.809021
ENST00000624656.1|ENSG00000279833.1|OTTHUMG00000189207.1|OTTHUMT00000479038.1|ENST00000624656|ENSG00000279833|3671	3.671	0	0	2	0	0	0	2	0.544811	0	0	0	0	0	0	0	0	0	0	0	0	0	0	0	0	0	0	0	0	0	0
ENST00000624658.1|ENSG00000279667.1|OTTHUMG00000175831.1|OTTHUMT00000431152.1|ENST00000624658|ENSG00000279667|1005	1.005	0	0	0	0	0	2	2	1.99005	0.0880547	0.264741	0.432373	0.923284	2.94531	0.874119	1.39658	0.267498	2.16356	3.70532	4.40778	3.91952	5.05788	5.2539	0.0531611	0	0.312237	0.573712	0.107333	0.791593	0.217071	0.844851
ENST00000624661.1|ENSG00000279613.1|OTTHUMG00000177964.1|OTTHUMT00000439996.1|ENST00000624661|ENSG00000279613|1809	1.809	0	0	1	1	0	0	2	1.10558	0.113788	0.058678	0.145108	0.211144	0.329651	0.633391	0.190441	0.279374	0.133825	0.169997	0.0459746	0	0	0.0511251	0.0135715	0	1.32577	0.567823	0.178966	0.0849481	0.0906992	0
ENST00000624679.1|ENSG00000280378.1|OTTHUMG00000186557.1|OTTHUMT00000473346.1|ENST00000624679|ENSG00000280378|1755	1.755	0	0	0	1	0	1	2	1.1396	0	0	0.074164	0.219837	0	0.331379	0.0193643	0.0172398	0	0	0	0.159546	0	0.0615242	0	0	0	0.116901	0	0	0	0
ENST00000624708.1|ENSG00000279886.1|OTTHUMG00000177760.1|OTTHUMT00000438867.1|ENST00000624708|ENSG00000279886|587	0.587	0	0	1	1	0	0	2	3.40716	0	0.055639	0	0	0.996944	0	0	0	0	0	0	0	0	0	0	0	0	0	0	0	0	0
ENST00000624722.1|ENSG00000279641.1|OTTHUMG00000178009.2|OTTHUMT00000440217.2|ENST00000624722|ENSG00000279641|1615	1.615	1	0	1	0	0	0	2	1.23839	0.0257604	0	0.0164862	0	0.187251	0.135123	0.00751968	0.0193893	0.155037	0	0	0	0	0.237234	0.0461664	0	0.769758	0.565242	0.104136	0	0.105522	0.211318
ENST00000624725.1|ENSG00000278983.1|OTTHUMG00000180000.1|OTTHUMT00000449231.1|ENST00000624725|ENSG00000278983|3548	3.548	0	0	0	0	1	1	2	0.563698	0.0276475	0.0102019	0.591213	0.997464	3.39584	0.667469	0	0	0.560905	0.0510897	0.239537	0.139679	0.105674	0.0928954	0.0174192	0.0480753	0.0707216	1.84675	1.48338	2.7232	0.842461	0.473253
ENST00000624743.1|ENSG00000280268.1|OTTHUMG00000177647.1|OTTHUMT00000438231.1|ENST00000624743|ENSG00000280268|1922	1.922	0	0	0	0	0	2	2	1.04058	0	0.0148472	0.0370601	0	0	0	0	0	0.0883191	0.0413079	0.151775	0	0	0.0767051	0	0	0	0	0	0	0	0
ENST00000624796.1|ENSG00000279875.1|OTTHUMG00000172903.1|OTTHUMT00000421322.1|ENST00000624796|ENSG00000279875|1859	1.859	0	0	0	0	0	2	2	1.07585	0	0	0	0.0204815	0	0	0	0	0.0646332	0.164235	0	0	0	0	0	0	0	0	0	0	0	0
ENST00000624840.1|ENSG00000280205.1|OTTHUMG00000179139.1|OTTHUMT00000444933.1|ENST00000624840|ENSG00000280205|3765	3.765	0	0	0	0	0	2	2	0.531208	0	0	0	0	0	0	0	0	0.0052837	0	0	0	0	0	0	0	0	0	0	0	0	0
ENST00000624849.1|ENSG00000279320.1|OTTHUMG00000175835.1|OTTHUMT00000431157.1|ENST00000624849|ENSG00000279320|1991	1.991	0	0	0	0	0	2	2	1.00452	0.0205141	0.0528965	0.15663	0.322842	0.815619	0.21409	0.00586931	0	0.830211	1.28134	2.64558	4.57483	2.3159	3.16859	0	0	0.938391	0.717633	1.26477	3.79905	1.0418	1.38936
ENST00000624945.1|ENSG00000279159.1|OTTHUMG00000189264.1|OTTHUMT00000479246.1|ENST00000624945|ENSG00000279159|49287	49.287	0	0	0	0	0	2	2	0.0405787	0.00231311	0.00202387	0.00287151	0.00356196	0.0296058	0.0192742	0.000820784	0	0	0.00247717	0	0	0	0	0.00136486	0.00111207	0.00379026	0.00231787	0	0	0	0.00105512
ENST00000624961.1|ENSG00000279568.1|OTTHUMG00000177165.1|OTTHUMT00000435695.1|ENST00000624961|ENSG00000279568|1746	1.746	1	0	0	1	0	0	2	1.14548	0.0709588	0	0.0828583	0.118525	2.0297	0.657277	0	0.00882929	0.700236	0.355719	0.385067	0.338064	0.248258	0.267617	0	0	0	0	0.046884	0.0444626	0	0
ENST00000624986.1|ENSG00000280239.1|OTTHUMG00000182005.1|OTTHUMT00000458640.1|ENST00000624986|ENSG00000280239|2027	2.027	0	0	1	1	0	0	2	0.98668	0.524109	0.48535	0.524515	0.241922	5.23011	5.15741	0.143713	0.459464	0.521962	1.62188	2.02971	1.78938	1.7848	2.52294	0.791594	0.397129	4.01396	1.82423	3.09064	3.12646	3.64253	3.00182
ENST00000624987.1|ENSG00000280392.1|OTTHUMG00000176692.1|OTTHUMT00000433145.1|ENST00000624987|ENSG00000280392|3443	3.443	0	0	0	0	0	2	2	0.580889	0.077397	0.0445864	1.79873	3.09513	7.63804	2.1392	0	0	0.37518	0.026116	1.66354	2.02003	1.1661	1.55076	0.374156	0.0759355	0.167577	2.55662	3.2782	4.00424	1.10461	1.58461
ENST00000624993.1|ENSG00000279127.1|OTTHUMG00000175918.1|OTTHUMT00000431272.1|ENST00000624993|ENSG00000279127|2077	2.077	0	0	0	0	0	2	2	0.962927	0.0145686	0	0	0	0	0	0	0	0	0.0621648	0	0	0	0	0	0	0	0	0	0	0	0
ENST00000625000.1|ENSG00000279743.1|OTTHUMG00000177545.1|OTTHUMT00000437487.1|ENST00000625000|ENSG00000279743|2138	2.138	0	0	0	0	1	1	2	0.935454	0	0	0	0	0	0	0	0	0	0	0	0	0	0	0	0	0	0	0	0	0	0
ENST00000625040.1|ENSG00000280122.1|OTTHUMG00000177281.1|OTTHUMT00000436095.1|ENST00000625040|ENSG00000280122|3246	3.246	0	0	0	2	0	0	2	0.616143	0	0	0.00467295	0	0	0	0	0	0.00281166	0	0	0.0319473	0	0	0.0116187	0	0	0	0	0	0	0
ENST00000625041.2|ENSG00000279088.2|OTTHUMG00000176185.1|OTTHUMT00000431608.1|ENST00000625041|ENSG00000279088|1355	1.355	0	0	0	1	0	1	2	1.47601	7.10389	7.42193	19.1773	27.5883	89.7723	51.1529	57.3057	18.7278	135.928	120.618	47.5503	62.9403	24.2209	47.0406	5.12	1.93107	101.138	61.1828	17.5442	25.9465	6.28294	8.05542
ENST00000625081.1|ENSG00000279437.1|OTTHUMG00000185373.2|OTTHUMT00000470361.2|ENST00000625081|ENSG00000279437|3192	3.192	0	1	0	0	0	1	2	0.626566	0	0.0213699	0	0	0	0	0	0	0	0	0	0	0	0	0	0	0	0	0	0	0	0
ENST00000625118.1|ENSG00000279071.1|OTTHUMG00000168625.1|OTTHUMT00000400416.1|ENST00000625118|ENSG00000279071|1834	1.834	0	0	1	1	0	0	2	1.09051	0	0	0	0	0	0	0	0	0	0	0	0	0	0	0	0.032764	0	0	0	0	0	0.0358343
ENST00000625119.1|ENSG00000280274.1|OTTHUMG00000176934.1|OTTHUMT00000434355.1|ENST00000625119|ENSG00000280274|1294	1.294	1	0	0	0	0	1	2	1.5456	0	0	0	0.0755068	0	0	0	0	0	0	0	0	0	0	0.0226393	0	0.240245	0	0	0.0940648	0	0
ENST00000625123.1|ENSG00000278867.1|OTTHUMG00000179458.1|OTTHUMT00000446520.1|ENST00000625123|ENSG00000278867|2179	2.179	0	0	0	1	0	1	2	0.917852	0.0272733	0	0	0	0	0.07706	0	0.0285497	0	0	1.39191	0.0334714	0.451486	0	0	0	0	0	0	0	0.120748	0.289173
ENST00000625132.1|ENSG00000280119.1|OTTHUMG00000133420.2|OTTHUMT00000257282.2|ENST00000625132|ENSG00000280119|4805	4.805	0	0	0	0	0	2	2	0.416233	0	0.00010981	0	0	0	0	0	0	0	0	0	0	0	0	0	0.0109208	0	0	0	0	0.00959262	0
ENST00000625142.1|ENSG00000280107.1|OTTHUMG00000175908.1|OTTHUMT00000431261.1|ENST00000625142|ENSG00000280107|1677	1.677	0	0	0	0	0	2	2	1.19261	0.51908	0.701029	1.67468	3.26457	12.2922	4.4867	2.8171	1.09325	5.53356	10.3042	4.11017	8.33893	2.9631	5.24727	0.531261	0.325542	7.46681	6.09192	2.52342	3.04626	0.501422	0.764193
ENST00000625152.1|ENSG00000280115.1|OTTHUMG00000176928.1|OTTHUMT00000434349.1|ENST00000625152|ENSG00000280115|767	0.767	0	0	0	0	0	2	2	2.60756	0	0	0	0.689217	0	0.343524	0	0	0	0	0.189553	0	0	0	0.0502171	0.188224	0	0	0	0	0	0
ENST00000625159.1|ENSG00000280039.1|OTTHUMG00000177015.2|OTTHUMT00000434841.2|RN7SKP23-201|RN7SKP23|4301	4.301	1	0	0	0	0	1	2	0.465008	0.00911306	0	0.0228591	0.0249374	0.0649324	0.0154913	0	0	0	0	0	0	0	0	0.00539255	0	0	0	0	0	0	0
ENST00000625180.1|ENSG00000279474.1|OTTHUMG00000180262.1|OTTHUMT00000450499.1|ENST00000625180|ENSG00000279474|2167	2.167	0	2	0	0	0	0	2	0.922935	0	0	0	0	0	0	0	0	0	0	0	0	0	0	0	0	0	0	0	0	0	0
ENST00000625181.1|ENSG00000279601.1|OTTHUMG00000175503.1|OTTHUMT00000430295.1|ENST00000625181|ENSG00000279601|2492	2.492	0	0	1	1	0	0	2	0.802568	0.0322711	0.0416106	0.0204111	0.0593892	0	0.222038	0.0136238	0.0117076	0.180638	0.172382	0	0	0.0267713	0.0688191	0.0383438	0.0704705	0.801447	0.217887	0	0.0572098	0.0303432	0.0245934
ENST00000625186.1|ENSG00000278969.1|OTTHUMG00000187475.1|OTTHUMT00000475055.1|ENST00000625186|ENSG00000278969|2373	2.373	0	0	0	1	0	1	2	0.842815	0	0	0	0	0	0	0	0	0	0	0	0	0	0	0	0	0	0	0	0	0	0
ENST00000625191.3|ENSG00000204661.9|OTTHUMG00000163221.5|OTTHUMT00000372148.3|C5orf60-208|C5orf60|1208	1.208	0	0	1	1	0	0	2	1.65563	0	0	0	0	0	0.0556149	0	0	0	0	0	0	0	0	0.0116866	0	0	0	0	0	0	0
ENST00000625199.1|ENSG00000279339.1|OTTHUMG00000177583.1|OTTHUMT00000437898.1|ENST00000625199|ENSG00000279339|2889	2.889	0	0	1	1	0	0	2	0.692281	0	0	0	0.0126628	0	0	0	0	0	0	0	0	0	0	0	0	0	0	0	0	0	0.0206796
ENST00000625474.1|ENSG00000281453.1|OTTHUMG00000189749.1|OTTHUMT00000481666.1|TGFB2-OT1-201|TGFB2-OT1|1371	1.371	0	1	0	0	0	1	2	1.45879	0	0	0	0	0	0	0.00472608	0	0	0	0	0	0	0	0	0	0	0	0	0.248667	3.2e-06	0
ENST00000626230.2|ENSG00000280809.5|OTTHUMG00000189579.4|OTTHUMT00000480001.1|LINC00836-202|LINC00836|1640	1.64	0	0	0	0	0	2	2	1.21951	NA	NA	NA	NA	NA	NA	NA	NA	NA	NA	NA	NA	NA	NA	NA	NA	NA	NA	NA	NA	NA	NA
ENST00000626392.1|ENSG00000281477.1|OTTHUMG00000189701.1|OTTHUMT00000480516.1|LINC01955-201|LINC01955|792	0.792	0	0	0	1	1	0	2	2.52525	0	0	0	0	0	0	0	0	0	0	0	0	0	0	0	0	0	0	0	0	0	0
ENST00000627642.1|ENSG00000290749.1|-|OTTHUMT00000483608.1|ENST00000627642|ENSG00000290749|621	0.621	0	0	0	0	1	1	2	3.22061	0	0	0	0	0	0	0	0	0	0	0	0	0	0	0	0	0	0	0	0	0	0
ENST00000629058.1|ENSG00000281376.1|OTTHUMG00000189574.1|OTTHUMT00000479993.1|ABALON-201|ABALON|1903	1.903	0	0	1	1	0	0	2	1.05097	0.344654	0.333256	0.493724	0.798206	1.24628	1.90704	0.0371227	0.0877365	1.63156	1.99348	0.0861822	0.0605389	0.111345	0.38337	0.410781	0.188769	4.72038	3.64804	0.335087	0.676891	0.127379	0.341953
ENST00000629535.3|ENSG00000281091.3|OTTHUMG00000189758.2|OTTHUMT00000481762.2|ENST00000629535|ENSG00000281091|2720	2.72	0	0	0	0	0	2	2	0.735294	0.351737	0.292327	0.492374	0.493057	4.72081	2.36593	0.266567	0.0877792	0.432576	0.614882	0.690983	0.800177	0.200022	0.820766	0.0509922	0.0838146	0	0.00316145	0.113085	0.0834165	0	0.035445
ENST00000630034.1|ENSG00000280660.1|OTTHUMG00000189680.1|OTTHUMT00000480271.1|ENST00000630034|ENSG00000280660|8444	8.444	0	0	0	1	0	1	2	0.236855	0	0	0.0029757	0	0	0	0	0	0	0	0	0	0	0	0	0	0	0	0	0	0	0
ENST00000631079.2|ENSG00000281160.2|OTTHUMG00000189593.1|OTTHUMT00000480040.1|ENST00000631079|ENSG00000281160|1493	1.493	0	0	1	1	0	0	2	1.33958	0	0	0	0	0	0	0	0	0	0	0	0	0	0	0	0	0	0	0	0	0	0
ENST00000631770.1|ENSG00000290536.1|-|OTTHUMT00000487802.1|ENST00000631770|ENSG00000290536|1447	1.447	0	2	0	0	0	0	2	1.38217	0	0	0	0	0	0	0.00779863	0	0	0	0	0	0	0	0	0	0	0	0	0	0	0
ENST00000632077.1|ENSG00000267496.4|OTTHUMG00000181798.1|-|FAM215A-202|FAM215A|792	0.792	1	0	1	0	0	0	2	2.52525	0	0	0	0.0574962	0	0	0	0	0	0	0	0	0	0	0	0	0	0	0	0	0	0
ENST00000632210.1|ENSG00000281969.1|OTTHUMG00000191456.1|OTTHUMT00000487930.1|ENST00000632210|ENSG00000281969|4477	4.477	0	0	0	0	0	2	2	0.446728	0	0	0	0	0	0	0	0	0	0	0	0	0	0	0	0	0	0	0.00756013	0	0	0
ENST00000633169.1|ENSG00000278966.2|OTTHUMG00000191421.1|OTTHUMT00000487847.1|ENST00000633169|ENSG00000278966|911	0.911	0	0	1	1	0	0	2	2.19539	0	0	0	0.0479592	0	0	0	0	0	0	0	0	0	0	0	0	0	0	0	0.117163	0.259312	0
ENST00000635495.1|ENSG00000282943.1|OTTHUMG00000191604.1|OTTHUMT00000488822.1|ENST00000635495|ENSG00000282943|1833	1.833	0	0	0	0	0	2	2	1.09111	0	0	0	0	0	0	0	0	0	0	0	0	0	0	0	0	0	0	0	0	0	0
ENST00000635591.1|ENSG00000283122.1|OTTHUMG00000189750.2|OTTHUMT00000481687.2|HYMAI-201|HYMAI|3347	3.347	1	0	0	0	0	1	2	0.59755	0.173507	0.157785	1.32054	1.41245	10.6801	3.13567	0.151593	0.164968	9.71023	9.9843	1.63793	1.66845	0.609785	0.9288	0	0.0134415	2.40832	2.99228	0.51108	0.541357	0.101362	0.0216679
ENST00000636386.1|ENSG00000283445.1|OTTHUMG00000191617.1|OTTHUMT00000488850.1|ENST00000636386|ENSG00000283445|2708	2.708	1	0	0	0	0	1	2	0.738552	0	0	0	0.012298	0	0	0	0	0	0	0	0	0	0	0	0	0	0	0	0	0	0
ENST00000636819.1|ENSG00000249738.10|OTTHUMG00000163541.5|OTTHUMT00000489653.1|ENST00000636819|ENSG00000249738|4154	4.154	0	0	0	0	0	2	2	0.481464	0	0	0	0	0	0	0	0	0	0	0	0	0	0	0	0	0	0	0	0	0	0
ENST00000637093.1|ENSG00000290609.1|-|OTTHUMT00000489660.1|ENST00000637093|ENSG00000290609|1543	1.543	0	0	1	1	0	0	2	1.29618	0.0270869	0	0	0	0	0.0189994	0	0	0	0	0	0	0.0485895	0.0630544	0	0	0	0	0	0.157084	0	0.134739
ENST00000637973.1|ENSG00000283667.1|OTTHUMG00000191685.1|OTTHUMT00000489394.1|ENST00000637973|ENSG00000283667|1609	1.609	1	0	0	0	0	1	2	1.24301	0	0	0	0	0	0	0	0	0	0	0	0	0	0	0.00516456	0.0378774	0	0	0	0.0495023	0	0.0424724
ENST00000638312.1|ENSG00000284430.1|OTTHUMG00000191896.1|OTTHUMT00000491072.1|ENST00000638312|ENSG00000284430|5059	5.059	0	0	0	0	0	2	2	0.395335	0	0	0	0	0	0	0	0	0	0.0166025	0	0	0	0	0	0	0	0.0352121	0	0	0	0
ENST00000638462.1|ENSG00000284095.1|OTTHUMG00000192155.1|OTTHUMT00000492346.1|ENST00000638462|ENSG00000284095|1354	1.354	0	0	2	0	0	0	2	1.4771	0.0315045	0	0	0.0296782	0.103445	0	0	0	0	0	0	0	0	0	0	0	0	0	0	0	0	0
ENST00000638502.1|ENSG00000280184.2|OTTHUMG00000192184.1|OTTHUMT00000492460.1|ENST00000638502|ENSG00000280184|2704	2.704	0	1	0	0	0	1	2	0.739645	0.976729	0.739498	1.53257	1.82255	13.6424	4.32423	0.190645	0.0373951	10.9524	10.9642	8.93017	13.0252	5.45007	11.1524	0.546202	0.107635	6.06105	11.4187	2.93004	3.76601	0.522822	0.714752
ENST00000638795.1|ENSG00000284391.1|OTTHUMG00000191994.1|OTTHUMT00000491891.1|ENST00000638795|ENSG00000284391|1529	1.529	0	1	0	0	0	1	2	1.30804	0.0273609	0.0265807	0.0286202	0	0	0	0.00803654	0	0	0.105781	0	0	0	0	0	0	0.165802	0	0	0	0	0
ENST00000638898.1|ENSG00000279342.2|OTTHUMG00000192034.1|OTTHUMT00000492066.1|ENST00000638898|ENSG00000279342|3579	3.579	0	0	0	0	0	2	2	0.558815	0.129214	0.0864731	2.29644	4.35007	11.3461	3.06105	1.05366	0.310855	5.46221	6.12992	2.47519	3.79997	1.84838	2.75399	1.30969	0.180173	7.35679	9.08767	2.47445	1.96728	0.566688	1.03591
ENST00000639259.2|ENSG00000279317.4|OTTHUMG00000154719.2|OTTHUMT00000492299.1|ENST00000639259|ENSG00000279317|3963	3.963	1	0	0	0	0	1	2	0.504668	0	0	0	0	0	0	0	0	0	0	0	0	0.00707538	0.0140493	0	0	0	0	0	0	0.0225896	0.0183324
ENST00000639316.2|ENSG00000263745.7|OTTHUMG00000178384.7|OTTHUMT00000492308.2|ENST00000639316|ENSG00000263745|4286	4.286	0	0	0	0	0	2	2	0.466636	0.0182911	0	0	0	0	0.0227232	0	0	0	0.0175787	0	0.0341078	0.0470715	0	0	0	0	0	0.00173839	0	0	0
ENST00000640049.1|ENSG00000279096.2|OTTHUMG00000192115.1|OTTHUMT00000492252.1|ENST00000640049|ENSG00000279096|2669	2.669	0	1	0	0	0	1	2	0.749344	0	0	0	0.0965077	0	0.0515191	0	0	0	0	0	0	0	0	0	0	0	0	0	0	0	0
ENST00000640224.1|ENSG00000290706.1|-|OTTHUMT00000047295.2|FAM238C-205|FAM238C|1268	1.268	0	0	1	1	0	0	2	1.57729	0	0	0	0	0	0.0296744	0	0	0	0	0	0	0	0	0.0276594	0	0	0	0	0	0	0.129785
ENST00000640274.1|ENSG00000280080.2|OTTHUMG00000192097.1|OTTHUMT00000492212.1|TBC1D22A-AS1-202|TBC1D22A-AS1|1951	1.951	0	0	1	0	1	0	2	1.02512	0	0	0	0	0.0757705	0	0	0	0	0	0	0	0	0	0	0	0	0	0	0	0	0
ENST00000640945.1|ENSG00000279261.2|OTTHUMG00000192130.1|OTTHUMT00000492283.1|LINC02961-202|LINC02961|2438	2.438	0	0	0	0	0	2	2	0.820345	0	0	0	0	0	0.0284266	0	0	0	0.0589712	0	0	0	0	0.12758	0	3.47407	1.28626	0.430142	0.322993	0.0623168	0.0504866
ENST00000641004.1|ENSG00000290822.1|-|OTTHUMT00000493608.1|ENST00000641004|ENSG00000290822|1759	1.759	0	0	0	0	0	2	2	1.13701	0	0	0	0	0	0	0	0	0	0	0	0	0	0	0	0	0	0	0	0	0	0
ENST00000641122.1|ENSG00000284656.1|OTTHUMG00000192348.1|OTTHUMT00000493643.1|ENST00000641122|ENSG00000284656|3727	3.727	0	0	1	1	0	0	2	0.536625	0	0	0	0.0097435	0.0759221	0	0	0	0	0	0	0.0819757	0	0	0	0	0	0	0	0	0	0
ENST00000641132.1|ENSG00000290694.1|-|OTTHUMT00000493476.1|ENST00000641132|ENSG00000290694|1178	1.178	0	0	0	0	0	2	2	1.69779	0	0	0	0	0	0	0	0	0	0	0	0	0	0	0	0	0	0	0	0	0	0
ENST00000641144.1|ENSG00000291007.1|-|OTTHUMT00000492901.1|ENST00000641144|ENSG00000291007|6171	6.171	0	0	0	0	0	2	2	0.324097	0.00688931	0.00596221	0	0	0	0	0	0	0	0	0	0	0	0	0.00335566	0	0	0	0.018791	0	0	0.00430321
ENST00000641173.1|ENSG00000290363.1|-|OTTHUMT00000493640.1|ENST00000641173|ENSG00000290363|1788	1.788	0	0	0	0	0	2	2	1.11857	0	0	0.018456	0	0	0.0746155	0	0	0	0	0	0	0	0	0	0	0	0	0	0	0	0
ENST00000641257.1|ENSG00000290744.1|-|OTTHUMT00000493362.1|ENST00000641257|ENSG00000290744|1534	1.534	0	0	0	0	0	2	2	1.30378	0	0	0	0	0	0	0	0	0	0	0	0	0	0	0	0	0	0	0	0	0	0
ENST00000641352.1|ENSG00000284618.1|OTTHUMG00000192346.2|OTTHUMT00000493631.2|ENST00000641352|ENSG00000284618|4068	4.068	0	1	1	0	0	0	2	0.491642	0.0193892	0.0083204	0	0.00882794	0	0	0	0	0	0	0	0	0	0	0.00572763	0.0140339	0	0	0	0	0	0
ENST00000641370.1|ENSG00000291222.1|-|OTTHUMT00000492900.1|ENST00000641370|ENSG00000291222|1242	1.242	0	0	0	0	0	2	2	1.61031	0	0	0	0	0	0	0	0	0	0	0	0	0	0	1.39e-09	0	0	0	0	0	0	0
ENST00000641378.1|ENSG00000290765.1|-|OTTHUMT00000493176.1|ENST00000641378|ENSG00000290765|2919	2.919	0	0	0	0	0	2	2	0.685166	0	0	0.0120116	0.0174667	0	0	0	0	0	0	0.0660342	0.0360984	0	0	0	0	0	0	0.0247863	0	0	0
ENST00000641402.1|ENSG00000284640.1|OTTHUMG00000192315.1|OTTHUMT00000493483.1|ENST00000641402|ENSG00000284640|1886	1.886	0	0	1	1	0	0	2	1.06045	0	0	0	0.0154381	0.0067931	0	0	0	0	0	0.0446132	0	0	0	0	0	0	0.0395598	0	0.0205586	0.00168292	0
ENST00000641424.1|ENSG00000290650.1|-|OTTHUMT00000493223.1|ENST00000641424|ENSG00000290650|3046	3.046	0	0	0	0	0	2	2	0.656599	0	0	0	0	0	0	0	0	0	0	0	0	0	0	0	0	0	0	0	0	0	0
ENST00000641448.2|ENSG00000284738.2|OTTHUMG00000192262.1|OTTHUMT00000493043.1|ENST00000641448|ENSG00000284738|1325	1.325	0	0	1	1	0	0	2	1.50943	0.0716342	0.0949648	0.296087	0.437425	0	0.283996	0.015572	0	0.571883	1.11945	0.0458513	0.154227	0	0.952705	0.205473	0.0266122	3.17467	0.634834	0	0.137869	0.0227145	0.310441
ENST00000641564.1|ENSG00000290411.1|-|OTTHUMT00000493360.1|ENST00000641564|ENSG00000290411|3163	3.163	0	0	0	0	0	2	2	0.632311	0	0	0	0	0	0	0	0	0	0	0	0	0	0	0.0371979	0.0182286	0	0	0	0.0447427	0	0
ENST00000641567.1|ENSG00000290612.1|-|OTTHUMT00000492830.1|ENST00000641567|ENSG00000290612|1023	1.023	0	0	0	0	1	1	2	1.95503	0.0349697	0	0	0	0	0	0	0	0	0	0	0	0	0	0	0	0	0	0	0	0	0
ENST00000641612.1|ENSG00000290703.1|-|OTTHUMT00000493576.1|ENST00000641612|ENSG00000290703|1325	1.325	0	0	0	0	1	1	2	1.50943	0	0	0	0	0	0	0	0	0	0	0	0	0	0	0	0	0	0	0	0	0	0
ENST00000641739.1|ENSG00000290479.1|-|OTTHUMT00000493091.1|ENST00000641739|ENSG00000290479|1652	1.652	0	0	0	0	0	2	2	1.21065	0	0	0	0	0	0	0	0	0	0	0	0	0	0	0	0	0	0	0	0	0	0
ENST00000641744.1|ENSG00000290653.1|-|OTTHUMT00000493269.1|ENST00000641744|ENSG00000290653|3467	3.467	0	0	0	0	0	2	2	0.576868	0	0	0	0	0	0	0	0	0	0.00711537	0	0	0	0	0	0	0	0	0	0	0	0
ENST00000641780.1|ENSG00000290781.1|-|OTTHUMT00000493463.1|ENST00000641780|ENSG00000290781|2063	2.063	0	0	0	0	1	1	2	0.969462	0	0	0	0	0	0	0	0	0	0	0	0	0	0	0	0	0	0	0	0	0	0
ENST00000641950.2|ENSG00000233718.9|OTTHUMG00000151741.4|OTTHUMT00000267899.2|MYCNOS-205|MYCNOS|3218	3.218	0	0	1	1	0	0	2	0.621504	0	0	0	0	0	0	0	0	0	0	0	0	0	0	0	0	0	0	0	0	0	0
ENST00000641966.1|ENSG00000290829.1|-|OTTHUMT00000492978.1|ENST00000641966|ENSG00000290829|3141	3.141	0	0	0	0	0	2	2	0.63674	0	0	0	0	0	0	0	0	0	0	0	0	0.0204817	0	0	0.0337321	0	0	0	0	0	0
ENST00000641994.1|ENSG00000290828.1|-|OTTHUMT00000493110.1|ENST00000641994|ENSG00000290828|1033	1.033	0	0	0	0	0	2	2	1.93611	0	0	0	0	0	0	0	0	0	0	0	0	0	0	0.00859555	0	0	0	0	0	0	0
ENST00000642091.1|ENSG00000290478.1|-|OTTHUMT00000493093.1|ENST00000642091|ENSG00000290478|1883	1.883	0	0	0	0	0	2	2	1.06213	0	0	0.103186	0.00351241	0	0.173335	0	0	0	0	0	0	0	0.0485688	0.0129865	0	0	0.0247205	0	0	0	0
ENST00000642116.1|ENSG00000290826.1|-|OTTHUMT00000492680.1|ENST00000642116|ENSG00000290826|1414	1.414	0	0	0	0	0	2	2	1.41443	0	0	0	0	0.21798	0	0	0.0114105	0	0	0	0	0	0	0	0	0	0	0	0	0	0
ENST00000642149.1|ENSG00000232234.4|OTTHUMG00000192537.4|OTTHUMT00000495710.1|ENST00000642149|ENSG00000232234|1400	1.4	0	0	0	0	0	2	2	1.42857	0	0	0	0	0	0	0	0	0	0	0	0	0	0	0	0	0	0	0	0	0	0
ENST00000642586.1|ENSG00000224478.3|OTTHUMG00000015925.4|OTTHUMT00000497226.1|ENST00000642586|ENSG00000224478|1269	1.269	0	0	1	1	0	0	2	1.57604	0	0	0	0	0	0	0	0	0	0	0	0	0	0	0	0	0	0	0	0	0	0
ENST00000642861.1|ENSG00000285486.1|OTTHUMG00000192566.1|OTTHUMT00000496345.1|ENST00000642861|ENSG00000285486|4061	4.061	0	0	1	1	0	0	2	0.49249	0	0	0.0182072	0.0264852	0.0689573	0	0	0	0	0	0.017661	0	0.0153647	0	0	0	0.0507632	0	0	0	0	0
ENST00000643055.1|ENSG00000284902.1|OTTHUMG00000192520.1|OTTHUMT00000495179.1|ENST00000643055|ENSG00000284902|1506	1.506	0	0	0	0	0	2	2	1.32802	0	0	0	0	0	0	0	0	0	0	1.0431	0.95855	0.208985	0	0.138184	0	0.887562	1.73933	0.0432116	0	0.0656671	0
ENST00000643361.1|ENSG00000285407.1|OTTHUMG00000192366.1|OTTHUMT00000493740.1|ENST00000643361|ENSG00000285407|1805	1.805	0	1	0	0	0	1	2	1.10803	0	0	0	0	0	0	0	0	0	0	0	0	0	0	0	0	0	0	0	0	0	0
ENST00000643391.1|ENSG00000290578.1|-|OTTHUMT00000497322.1|ENST00000643391|ENSG00000290578|1466	1.466	0	0	1	0	0	1	2	1.36426	0.0786548	0.0191922	0	0	0.0099701	0	0.0363652	0.00798029	0	0	0.0229425	0	0	0	0.0123657	0.0866494	0	0	0.173251	0.0488829	0.0513456	0
ENST00000644246.1|ENSG00000272449.3|OTTHUMG00000185639.2|OTTHUMT00000497130.1|ENST00000644246|ENSG00000272449|1531	1.531	0	1	0	1	0	0	2	1.30634	0.511948	0.864625	0.55693	0.528604	0	1.69615	0.864028	2.60116	3.1858	1.71122	0.339841	0.0576053	0.332977	0.33255	0.257162	0.477087	0.911357	0.883018	0.200855	0.0945289	0.113558	0.226935
ENST00000644657.1|ENSG00000225937.3|OTTHUMG00000020046.3|OTTHUMT00000496770.1|PCA3-207|PCA3|2374	2.374	0	0	0	0	0	2	2	0.84246	0	0	0	0	0	0	0	0	0	0	0	0	0	0	0	0	0	0	0	0	0	0
ENST00000644783.1|ENSG00000285361.1|OTTHUMG00000192373.1|OTTHUMT00000493753.1|ENST00000644783|ENSG00000285361|1318	1.318	0	0	0	0	0	2	2	1.51745	0	0	0	0	0	0	0	0	0	0	0	0	0	0	0.0387141	0	0	0	0	0	0	0
ENST00000644960.1|ENSG00000285012.1|OTTHUMG00000192584.1|OTTHUMT00000496896.1|ENST00000644960|ENSG00000285012|1087	1.087	0	0	1	1	0	0	2	1.83993	0	0	0	0	0	0	0	0	0	0	0	0	0	0	0	0	0	0	0	0	0	0
ENST00000644993.1|ENSG00000285051.2|OTTHUMG00000192432.3|OTTHUMT00000494102.1|SLC7A14-AS1-203|SLC7A14-AS1|1304	1.304	0	0	0	1	0	1	2	1.53374	NA	NA	NA	NA	NA	NA	NA	NA	NA	NA	NA	NA	NA	NA	NA	NA	NA	NA	NA	NA	NA	NA
ENST00000645747.1|ENSG00000285219.4|OTTHUMG00000160417.16|OTTHUMT00000495588.1|HULC-270|HULC|1783	1.783	0	0	0	0	0	2	2	1.1217	0	0	0	0	0	0	0	0	0	0	0	0	0	0	0	0	0	0	0	0	0	0
ENST00000646617.1|ENSG00000254186.3|OTTHUMG00000163326.8|OTTHUMT00000372922.2|ENST00000646617|ENSG00000254186|2798	2.798	0	0	1	0	0	1	2	0.714796	0.204887	0.224195	0.0942737	0.108505	0.550582	0.975394	0.389773	0.16847	0	0	0	0	0	0	0.0217181	0.0178176	0	0	0	0	0.0264256	0.069376
ENST00000647054.1|ENSG00000245008.4|OTTHUMG00000165791.3|OTTHUMT00000496968.1|ENST00000647054|ENSG00000245008|1003	1.003	0	0	0	0	1	1	2	1.99402	0.0435978	0	0	0	0	0	0	0	0	0	0	0	0	0	0	0	0	0	0	0	0	0
ENST00000647710.1|ENSG00000285706.1|OTTHUMG00000192871.1|OTTHUMT00000499429.1|ENST00000647710|ENSG00000285706|1938	1.938	0	1	0	0	0	1	2	1.03199	0.340153	0.253934	0.154604	0	0.331814	0.845894	0.376716	0.133102	0.187703	0.241114	0.201777	3.32e-06	0.533044	0.0984764	0	0	0	0	0	0	0	0
ENST00000647750.1|ENSG00000285967.1|OTTHUMG00000162033.3|OTTHUMT00000366970.2|NIPBL-DT-201|NIPBL-DT|2589	2.589	2	0	0	0	0	0	2	0.772499	0.141616	0.0373129	0	0	0	0	0	0.164688	0	0	0	0	0.117422	0	0	0.109361	0	0	0	0.0836654	0.0460191	0
ENST00000647864.1|ENSG00000285561.1|OTTHUMG00000192985.1|OTTHUMT00000499781.1|ENST00000647864|ENSG00000285561|4976	4.976	0	0	0	0	0	2	2	0.401929	0.00460426	0	0	0.00713986	0	0	0	0	0	0	0	0	0	0	0	0	0	0	0	0	0	0
ENST00000647952.1|ENSG00000290870.1|-|OTTHUMT00000499102.1|ENST00000647952|ENSG00000290870|3400	3.4	0	0	1	0	0	1	2	0.588235	0	0.00190925	0.054626	0.201974	0.549412	0.0236307	0.0342292	0	0.157242	0.0816128	0	0	0.0416294	0	0.013389	0	0.0300461	0	0	0.102641	0	0.0896414
ENST00000648190.1|ENSG00000285841.1|OTTHUMG00000192686.1|OTTHUMT00000498844.1|ENST00000648190|ENSG00000285841|3445	3.445	0	1	0	0	0	1	2	0.580552	0	0	0	0	0	0	0	0	0	0	0	0	0	0	0	0	0	0	0	0	0	0
ENST00000648217.1|ENSG00000285756.2|OTTHUMG00000067412.22|OTTHUMT00000500034.1|ENST00000648217|ENSG00000285756|3629	3.629	0	0	0	2	0	0	2	0.551116	3.36847	3.24103	0.495367	0.241043	4.99752	4.58075	1.53523	2.34539	3.58619	2.8117	2.80347	4.00336	3.35268	1.45683	0.0801752	0.0386309	0.169082	0.281732	0.529773	0.256772	0.357935	0.343131
ENST00000648249.1|ENSG00000254477.2|OTTHUMG00000167407.2|OTTHUMT00000499675.1|ENST00000648249|ENSG00000254477|1705	1.705	1	0	0	0	0	1	2	1.17302	0	0.0781909	0	0	0	0	0	0.00801807	0	0	0	0	0	0	0	0.142051	0	0	0	0	0	0
ENST00000648498.1|ENSG00000285644.1|OTTHUMG00000192846.1|OTTHUMT00000499340.1|ENST00000648498|ENSG00000285644|2507	2.507	0	0	0	0	0	2	2	0.797766	0.189352	0.168315	0	0.118971	0.0608652	0.309378	0.296207	0.314877	0	0.195684	0.0927933	0	0.0260249	0.0916655	0	0.0116288	0	0.00550327	0.0594072	0	0	0
ENST00000648514.1|ENSG00000284196.3|OTTHUMG00000191996.3|OTTHUMT00000499664.1|ENST00000648514|ENSG00000284196|3199	3.199	0	0	0	0	0	2	2	0.625195	0	0	0	0	0	0	0	0	0	0	0	0	0	0	0	0	0	0	0	0	0	0
ENST00000648601.1|ENSG00000285527.1|OTTHUMG00000192974.1|OTTHUMT00000499745.1|ENST00000648601|ENSG00000285527|3034	3.034	0	0	0	1	0	1	2	0.659196	0	0	0	0	0	0	0	0	0	0	0	0	0	0	0	0	0	0	0	0	0	0
ENST00000648606.1|ENSG00000285564.2|OTTHUMG00000192844.2|OTTHUMT00000499334.1|ENST00000648606|ENSG00000285564|4616	4.616	0	1	0	0	0	1	2	0.433276	0	0	0	0	0.030156	0	0	0	0.044913	0	0.0153337	0	0	0	0	0	0	0	0	0	0.0299089	0
ENST00000648887.1|ENSG00000285540.1|OTTHUMG00000193234.2|OTTHUMT00000500535.2|ENST00000648887|ENSG00000285540|1936	1.936	1	0	0	0	0	1	2	1.03306	0	0	0	0	0	0.0183198	0	0	6.22e-06	0	0	0	0.071611	0.0523066	0	0	0	0.0439089	0	0	0	0.0179828
ENST00000649017.1|ENSG00000275216.2|OTTHUMG00000187241.2|OTTHUMT00000500045.1|ENST00000649017|ENSG00000275216|1099	1.099	0	0	0	0	1	1	2	1.81984	0	0	0	0.0376232	0	0	0	0	0	0	0	0	0	0	0	0	0	0	0	0	0	0
ENST00000649154.1|ENSG00000291200.1|-|OTTHUMT00000501520.1|RHOXF1P1-203|RHOXF1P1|1544	1.544	0	0	0	0	1	1	2	1.29534	0	0	0.0132595	0	0.295596	0.0236296	0.0971562	0.00567804	0	0	0	0	0	0	0	0	0	0	0.0105803	0	0	0
ENST00000649228.1|ENSG00000285844.2|OTTHUMG00000193011.2|OTTHUMT00000499887.1|KCNQ5-DT-201|KCNQ5-DT|3938	3.938	0	0	0	2	0	0	2	0.507872	NA	NA	NA	NA	NA	NA	NA	NA	NA	NA	NA	NA	NA	NA	NA	NA	NA	NA	NA	NA	NA	NA
ENST00000649291.1|ENSG00000285737.1|OTTHUMG00000193292.2|OTTHUMT00000500661.2|LINC02680-201|LINC02680|3626	3.626	0	0	0	0	0	2	2	0.551572	0	0	0.0101274	0.039029	0.412727	0.0246607	0	0.00387095	0.0279203	0.14545	0.171907	0.5369	0.49146	0.418388	0.00308868	0	0	0.237225	0.233886	0.537581	0.555044	0.318246
ENST00000649512.1|ENSG00000285535.2|OTTHUMG00000192943.2|OTTHUMT00000499649.1|ENST00000649512|ENSG00000285535|2722	2.722	1	0	0	0	0	1	2	0.734754	0	0	0.00847204	0	0	0	0	0	0	0	0	0	0	0	0	0	0	0	0	0	0	0
ENST00000649516.1|ENSG00000285872.3|OTTHUMG00000192932.2|OTTHUMT00000499619.2|ENST00000649516|ENSG00000285872|1871	1.871	0	0	1	1	0	0	2	1.06895	0.157683	0.109059	0	0.0229775	0	0	0.0628204	0.271801	0.833937	0.405554	0.116325	0	0.0944908	0	0.454567	0.831776	0.5725	0.645402	0.503551	0.62651	0.435277	1.38701
ENST00000649584.1|ENSG00000285904.1|OTTHUMG00000192675.1|OTTHUMT00000498807.1|ENST00000649584|ENSG00000285904|4071	4.071	1	0	1	0	0	0	2	0.49128	0	0	0	0	0	0.0164133	0	0	0	0	0	0	0	0	0	0	0	0	0	0	0	0
ENST00000649594.1|ENSG00000285798.1|OTTHUMG00000193013.1|OTTHUMT00000499894.1|ENST00000649594|ENSG00000285798|1759	1.759	0	0	0	0	0	2	2	1.13701	0	0	0	0	0	0	0	0	0	0	0	0	0	0	0	0	0	0	0	0	0	0
ENST00000649672.1|ENSG00000285748.2|OTTHUMG00000193001.2|OTTHUMT00000499857.1|ENST00000649672|ENSG00000285748|3249	3.249	0	0	0	0	0	2	2	0.615574	0	0	0	0	0	0	0	0	0	0	0	0	0	0	0	0	0	0	0	0	0	0
ENST00000649904.1|ENSG00000285971.1|OTTHUMG00000192680.1|OTTHUMT00000498823.1|ENST00000649904|ENSG00000285971|2664	2.664	0	0	0	0	0	2	2	0.750751	0	0	0	0	0	0	0	0	0	0	0	0	0	0	0	0	0	0	0	0	0	0
ENST00000650038.1|ENSG00000224616.5|OTTHUMG00000040490.5|OTTHUMT00000498991.1|RTCA-AS1-202|RTCA-AS1|2668	2.668	0	0	0	0	0	2	2	0.749625	NA	NA	NA	NA	NA	NA	NA	NA	NA	NA	NA	NA	NA	NA	NA	NA	NA	NA	NA	NA	NA	NA
ENST00000650086.1|ENSG00000285627.1|OTTHUMG00000193299.1|OTTHUMT00000500676.1|ENST00000650086|ENSG00000285627|3470	3.47	1	0	0	0	0	1	2	0.576369	0	0	0.00716261	0	0	0	0	0	0	0	0	0	0	0	0	0	0.0605729	0	0	0	0	0
ENST00000650173.1|ENSG00000226571.2|OTTHUMG00000015689.2|OTTHUMT00000498267.1|ENST00000650173|ENSG00000226571|2413	2.413	0	0	0	0	0	2	2	0.828844	0	0.0412478	0	0.0468627	0.168778	0	0.0224696	0	0	0	0.043434	0.1106	0.0158699	0.0138354	0.00588709	0.0238941	0.243973	0	0	0	0	0
ENST00000650204.1|ENSG00000285725.1|OTTHUMG00000193353.1|OTTHUMT00000500898.1|ENST00000650204|ENSG00000285725|1910	1.91	0	0	0	0	1	1	2	1.04712	0.837238	1.42856	0.131907	0.223169	0.470584	1.07677	2.63512	4.0894	1.4278	0.473783	0.291992	0.478305	0	0.258951	1.69758	1.62708	0.827303	0.409186	0.196314	0.221729	0.216839	0.360859
ENST00000650347.1|ENSG00000285570.1|OTTHUMG00000193260.1|OTTHUMT00000500591.1|ENST00000650347|ENSG00000285570|956	0.956	0	0	1	1	0	0	2	2.09205	0	0	0	0.0936114	0.24648	0	0.0216973	0	0	0.317865	0	0	0	0.0536589	0	0	0	0	0	0	0	0
ENST00000650377.1|ENSG00000285908.1|OTTHUMG00000192839.1|OTTHUMT00000499316.1|ENST00000650377|ENSG00000285908|3301	3.301	0	0	1	1	0	0	2	0.605877	0	0	0	0	0	0	0	0.0171481	0.0326046	0	0	0	0	0	0.0218849	0	0	0.117643	0.0248278	0	0	0
ENST00000650415.1|ENSG00000285960.1|OTTHUMG00000192990.1|OTTHUMT00000499807.1|ENST00000650415|ENSG00000285960|1379	1.379	0	0	0	0	0	2	2	1.45033	0.0272953	0	0	0	0	0	0	0	0	0	0	0	0	0	0	0	0	0	0	0	0	0
ENST00000650504.1|ENSG00000285742.1|OTTHUMG00000193063.1|OTTHUMT00000500048.1|ENST00000650504|ENSG00000285742|1042	1.042	0	0	0	0	0	2	2	1.91939	0	0	0	0	0	0	0	0	0	0	0	0	0	0	0.0958689	0.0520512	0	0	0	0	0	0
ENST00000650606.1|ENSG00000185332.8|OTTHUMG00000177905.3|OTTHUMT00000439607.2|TMEM105-205|TMEM105|3321	3.321	0	0	0	2	0	0	2	0.602228	0	0	0.00185873	0	0.00224995	0	0	0	0	0	0	0	0	0	0	0	0	0	0	0	0	0
ENST00000650614.1|ENSG00000290963.1|-|OTTHUMT00000500995.1|ENST00000650614|ENSG00000290963|666	0.666	1	0	1	0	0	0	2	3.003	0	0	0	0	0	0	0	0	0	0	0	0	0	0	0	0	0	0	0	0	0	0
ENST00000650724.3|ENSG00000286024.3|OTTHUMG00000192774.1|OTTHUMT00000499086.1|ENST00000650724|ENSG00000286024|704	0.704	0	0	1	1	0	0	2	2.84091	0.0677144	0	0	0.126866	0	0.0445442	0	0	0	0	0	0	0	0	1.53747	1.19064	5.44295	1.90368	7.27536	5.5613	14.1228	4.92618
ENST00000650829.1|ENSG00000286011.2|OTTHUMG00000193441.6|OTTHUMT00000501698.4|ENST00000650829|ENSG00000286011|1063	1.063	0	0	0	0	1	1	2	1.88147	0	0.182661	0	0	0	0	0.0471144	0.0612181	0	0	0	0	0	0	0	0	0	0	0	0	0.181952	0
ENST00000650993.1|ENSG00000286158.1|OTTHUMG00000192707.1|OTTHUMT00000498901.1|ENST00000650993|ENSG00000286158|629	0.629	1	0	0	0	0	1	2	3.17965	0	0	0	0.0390659	0	0.078012	0	0	0	0	0	0	0	0	0	0	0	0	0	0	0	0
ENST00000651076.1|ENSG00000286272.1|OTTHUMG00000193082.2|OTTHUMT00000500092.2|ENST00000651076|ENSG00000286272|1447	1.447	0	0	0	0	0	2	2	1.38217	0	0	0	0	0	0	0	0	0	0	0	0	0	0	0	0	0	0	0	0	0	0
ENST00000651142.1|ENSG00000286238.1|OTTHUMG00000193004.1|OTTHUMT00000499865.1|ENST00000651142|ENSG00000286238|2539	2.539	0	0	0	0	0	2	2	0.787712	0	0	0	0	0	0	0	0	0	0	0	0	0	0	0	0	0	0	0	0	0	0
ENST00000651343.1|ENSG00000285998.1|OTTHUMG00000192676.1|OTTHUMT00000498808.1|ENST00000651343|ENSG00000285998|1225	1.225	0	0	0	0	0	2	2	1.63265	0	0	0	0	0	0	0	0	0	0	0	0	0	0	0	0	0	0	0	0	0	0
ENST00000651408.1|ENSG00000286116.1|OTTHUMG00000193464.1|OTTHUMT00000501882.1|ENST00000651408|ENSG00000286116|4205	4.205	0	0	1	1	0	0	2	0.475624	0.0343737	0.00483315	0	0.00128259	0.00502378	0.0268521	0	0.00330006	0.0697065	0	0	0.0215049	0	0.00233755	1.73351	1.61936	0.516355	0.264249	0.600954	0.758399	0.0745132	0.295017
ENST00000651612.1|ENSG00000249330.3|OTTHUMG00000160519.3|OTTHUMT00000499554.1|ENST00000651612|ENSG00000249330|3305	3.305	0	0	1	1	0	0	2	0.605144	0	0	0	0	0	0	0	0	0	0.0393764	0	0	0	0	0	0	0	0	0	0	0	0
ENST00000651678.1|ENSG00000286201.1|OTTHUMG00000193438.1|OTTHUMT00000501678.1|ENST00000651678|ENSG00000286201|6653	6.653	0	0	0	0	0	2	2	0.300616	0	0	0	0	0	0	0.00157725	0	0	0	0	0	0	0	0	0	0	0	0	0	0	0
ENST00000651690.1|ENSG00000286121.1|OTTHUMG00000192882.1|OTTHUMT00000499463.1|ENST00000651690|ENSG00000286121|2524	2.524	0	0	0	0	0	2	2	0.792393	0	0	0	0	0	0	0	0	0	0	0	0	0	0	0	0	0	0	0	0	0	0
ENST00000651702.2|ENSG00000272870.4|OTTHUMG00000186433.6|OTTHUMT00000499212.2|SAP30-DT-205|SAP30-DT|1489	1.489	1	0	0	0	0	1	2	1.34318	0	0	0	0	0	0	0.0663849	0.0107036	0	0	0	0	0	0	0	0	0	0	0.044474	0	0	0
ENST00000651726.1|ENSG00000286003.1|OTTHUMG00000192699.1|OTTHUMT00000498886.1|ENST00000651726|ENSG00000286003|1854	1.854	0	0	0	0	0	2	2	1.07875	0	0	0	0	0	0	0	0	0	0	0	0	0	0	0	0	0	0	0	0	0	0
ENST00000652050.1|ENSG00000229643.2|OTTHUMG00000040955.2|OTTHUMT00000501654.1|LINC00280-202|LINC00280|2355	2.355	1	0	0	0	0	1	2	0.849257	0	0	0	0	0	0	0	0	0	0	0	0	0	0	0	0	0	0	0	0	0	0
ENST00000652130.1|ENSG00000286196.1|OTTHUMG00000192941.1|OTTHUMT00000499646.1|ENST00000652130|ENSG00000286196|2332	2.332	0	0	1	1	0	0	2	0.857633	0	0	0	0	0	0	0	0	0	0.0621799	0	0	0	0	0	0	0	0	0	0	0	0
ENST00000652155.1|ENSG00000235888.5|OTTHUMG00000066035.7|OTTHUMT00000499832.1|LINC02940-203|LINC02940|5629	5.629	0	0	0	0	1	1	2	0.355303	0.00303983	0	0.00305542	0	0.0142129	0	0.0106637	0	0	0	0	0	0	0	0	0.00598031	0	0.0747449	0	0	0.0970336	0.102851
ENST00000652200.1|ENSG00000286045.1|OTTHUMG00000192856.1|OTTHUMT00000499376.1|ENST00000652200|ENSG00000286045|3734	3.734	1	0	0	1	0	0	2	0.535619	0	0	0	0	0	0	0	0	0	0	0	0	0	0	0	0	0	0	0	0	0	0
ENST00000652296.1|ENSG00000286040.1|OTTHUMG00000193486.1|OTTHUMT00000502123.1|ENST00000652296|ENSG00000286040|4968	4.968	0	0	0	0	0	2	2	0.402576	0	0	0	0	0	0	0	0	0	0	0	0	0	0	0	0	0	0	0	0	0	0
ENST00000652524.1|ENSG00000286035.1|OTTHUMG00000192940.1|OTTHUMT00000499644.1|ENST00000652524|ENSG00000286035|3267	3.267	0	0	0	0	0	2	2	0.612182	0	0.0214896	0	0.0309074	0	0.116077	0.0405767	0	0	0	0.239571	0	0.139223	0.0522896	0	0.00905167	0	0	0.184901	0.0708805	0.0193421	0
ENST00000652642.1|ENSG00000286211.1|OTTHUMG00000193131.1|OTTHUMT00000500252.1|ENST00000652642|ENSG00000286211|1050	1.05	0	0	0	0	0	2	2	1.90476	0	0	0	0	0	0	0	0	0	0	0	0	0	0.0879982	0	0	0	0	0	0	0	0
ENST00000652679.2|ENSG00000286081.2|OTTHUMG00000192772.2|OTTHUMT00000499080.2|ENST00000652679|ENSG00000286081|2488	2.488	0	0	0	0	0	2	2	0.803859	0.0399134	0.00897734	0	0.0148731	0	0	0	0	0	0.00129402	0.09298	0.0435583	0.0804662	0.137902	0	0	0	0	0	0	0	0
ENST00000652712.1|ENSG00000280916.4|OTTHUMG00000189532.2|OTTHUMT00000502312.1|FOXCUT-202|FOXCUT|2066	2.066	0	0	1	1	0	0	2	0.968054	0	0	0	0	0	0	0	0	0	0	0	0	0	0	0	0	0	0	0.0377119	0.0194606	0	0
ENST00000652791.1|ENSG00000286728.1|OTTHUMG00000195800.1|OTTHUMT00000528841.1|ENST00000652791|ENSG00000286728|2647	2.647	0	0	0	0	0	2	2	0.755572	0	0	0	0	0	0	0	0	0	0	0	0	0	0	0	0	0	0	0	0	0	0
ENST00000652817.1|ENSG00000287922.1|OTTHUMG00000195871.1|OTTHUMT00000529157.1|ENST00000652817|ENSG00000287922|2674	2.674	0	0	0	0	0	2	2	0.747943	0	0.0114912	0.0870265	0.228033	0	0.121171	0	0	0.153066	0.317366	0.113814	0.199959	0.121894	0.15826	0	0	0	0	0	0	0	0
ENST00000652912.1|ENSG00000287041.1|OTTHUMG00000195675.1|OTTHUMT00000528171.1|ENST00000652912|ENSG00000287041|4834	4.834	0	0	1	0	0	1	2	0.413736	0.0161567	0	0	0	0	0	0.00662135	0	0	0	0.0375532	0.000578895	0	0	0.0143355	0	0.0418905	0	0	0.129897	0.0253042	0
ENST00000653060.1|ENSG00000287405.1|OTTHUMG00000195808.1|OTTHUMT00000528879.1|ENST00000653060|ENSG00000287405|3352	3.352	1	0	0	0	0	1	2	0.596659	0	0	0	0	0	0	0	0	0	0	0	0	0	0	0	0	0	0	0	0	0	0
ENST00000653257.1|ENSG00000287315.1|OTTHUMG00000193832.1|OTTHUMT00000505240.1|ENST00000653257|ENSG00000287315|4828	4.828	0	0	1	1	0	0	2	0.41425	1.04109	0.799639	0.170815	0.251387	1.75261	2.92797	0.674717	1.24395	0.140301	0	0	0	0.018811	0	0	0	0.0419469	0	0	0	0	0
ENST00000653443.1|ENSG00000288016.3|OTTHUMG00000194890.1|OTTHUMT00000522927.1|ENST00000653443|ENSG00000288016|3074	3.074	0	0	1	0	0	1	2	0.650618	0	0	0	0	0	0.0169694	0	0	0	0	0	0	0	0	0	0	0	0	0	0	0	0
ENST00000653641.1|ENSG00000287031.1|OTTHUMG00000195447.1|OTTHUMT00000526934.1|ENST00000653641|ENSG00000287031|2408	2.408	1	0	0	0	0	1	2	0.830565	0.0840355	0.161975	0.0776644	0.0768274	0.0243548	0.139507	0.0618141	0.108835	0.431198	0.639955	0.0237907	0.118079	0.0502131	0.0170638	0.00968369	0	0.732769	0.224021	0.0505174	0	0.0316305	0
ENST00000654154.2|ENSG00000246022.4|OTTHUMG00000162642.3|OTTHUMT00000528536.1|ALDH1L1-AS2-204|ALDH1L1-AS2|2377	2.377	0	0	1	1	0	0	2	0.841397	0	0	0	0	0	0	0	0	0	0	0	0	0	0	0.0761884	0.326128	0	0	0.0634665	0	0.0147358	0.422174
ENST00000654159.1|ENSG00000287205.1|OTTHUMG00000194425.1|OTTHUMT00000516139.1|ENST00000654159|ENSG00000287205|951	0.951	0	0	0	1	0	1	2	2.10305	0.0469714	0	0	0.044949	0.0201765	0	0	0.00534031	0	0	0	0.165589	0	0	0	0	0	0	0	0	0	0
ENST00000654219.1|ENSG00000287172.1|OTTHUMG00000195586.1|OTTHUMT00000527612.1|ENST00000654219|ENSG00000287172|2438	2.438	0	0	0	0	1	1	2	0.820345	0.115256	0.126169	0	0	0	0.0127645	0.00898521	0	0	0	0	0	0	0	0	0	0	0	0	0	0	0
ENST00000654227.3|ENSG00000238142.4|OTTHUMG00000002204.5|OTTHUMT00000508711.1|ENST00000654227|ENSG00000238142|1666	1.666	0	0	0	0	0	2	2	1.20048	0	0	0	0	0	0	0	0	0	0	0	0	0.0439473	0	0	0	0	0	0	0	0	0
ENST00000654462.1|ENSG00000287360.1|OTTHUMG00000194881.1|OTTHUMT00000522856.1|ENST00000654462|ENSG00000287360|1356	1.356	1	0	0	0	0	1	2	1.47493	0.128153	0.0275139	0	0	0	0.0621612	0	0	0	0	0	0	0	0	0	0	0	0	0	0	0	0
ENST00000654474.1|ENSG00000261103.3|OTTHUMG00000176640.2|OTTHUMT00000526611.1|ENST00000654474|ENSG00000261103|3700	3.7	0	0	0	0	0	2	2	0.540541	0	0	0	0	0	0	0	0	0	0	0	0	0	0	0	0	0	0	0	0	0	0
ENST00000654602.1|ENSG00000233461.6|OTTHUMG00000039487.2|OTTHUMT00000095271.2|ENST00000654602|ENSG00000233461|2172	2.172	0	0	0	0	1	1	2	0.92081	0.285801	0.280257	0.0798038	0.290753	0	0.113751	2.00668	2.08286	0.843235	1.17103	0.223123	0.428487	0.588347	0.261115	0.961701	1.138	0.396746	0.419036	0.497522	0.252792	0.197622	0.572363
ENST00000654891.1|ENSG00000286802.1|OTTHUMG00000195620.1|OTTHUMT00000527873.1|ENST00000654891|ENSG00000286802|3491	3.491	0	0	0	0	0	2	2	0.572902	0.0498146	0.0763343	0	0.0109485	0	0	0.0375524	0.00796534	0	0	0	0	0	0.00383672	0.00670563	0	0	0	0.00083649	0	0	0
ENST00000655007.1|ENSG00000287309.1|OTTHUMG00000194991.1|OTTHUMT00000523557.1|ENST00000655007|ENSG00000287309|2248	2.248	0	0	0	1	0	1	2	0.88968	0	0	0	0	0	0	0	0	0	0	0	0	0	0	0	0	0	0	0	0	0	0
ENST00000655053.1|ENSG00000286788.1|OTTHUMG00000195017.1|OTTHUMT00000523770.1|ENST00000655053|ENSG00000286788|5569	5.569	0	0	0	0	1	1	2	0.359131	0	0	0	0.0127053	0	0.023656	0	0.00244926	0	0	0	0	0	0	0	0	0	0	0.0120042	0.0115759	0	0
ENST00000655056.1|ENSG00000223944.3|OTTHUMG00000004188.2|OTTHUMT00000528324.1|ENST00000655056|ENSG00000223944|2824	2.824	0	0	0	0	0	2	2	0.708215	0	0	0	0	0	0	0	0	0	0.0365005	0	0	0	0	0	0	0	0	0	0	0	0
ENST00000655170.3|ENSG00000262188.4|OTTHUMG00000177488.2|OTTHUMT00000510237.1|LINC01978-203|LINC01978|1160	1.16	0	0	0	2	0	0	2	1.72414	0	0	0	0	0	0	0	0	0	0	0	0	0	0	0.0224347	0.0550097	0	0	0	0	0	0
ENST00000655216.1|ENSG00000287403.1|OTTHUMG00000195338.1|OTTHUMT00000526405.1|ENST00000655216|ENSG00000287403|2402	2.402	0	0	0	1	0	1	2	0.832639	0	0	0	0	0.180983	0	0	0	0	0	0	0	0	0	0	0	0	0	0	0	0	0
ENST00000655276.1|ENSG00000257556.4|OTTHUMG00000170462.4|OTTHUMT00000523257.1|LINC02298-204|LINC02298|3060	3.06	0	0	0	1	0	1	2	0.653595	0.0130987	0.025363	0	0.0501472	0.0660359	0.000175506	0.00505036	0.00465846	0	0	0	0.0341832	0	0	0	0	0	0	0	0	0	0
ENST00000655369.1|ENSG00000286666.1|OTTHUMG00000195642.1|OTTHUMT00000527938.1|ENST00000655369|ENSG00000286666|3791	3.791	0	0	0	0	0	2	2	0.527565	0	0	0	0	0	0	0	0	0	0	0	0	0	0	0	0	0	0	0	0	0	0
ENST00000655402.1|ENSG00000236810.8|OTTHUMG00000002959.4|OTTHUMT00000528890.1|ELOA-AS1-204|ELOA-AS1|1502	1.502	0	0	0	0	1	1	2	1.33156	0.028013	0	0	0.0266243	0	0	0	0	0	0	0	0	0	0	0	0	0	0	0	0	0	0
ENST00000655406.1|ENSG00000236106.3|OTTHUMG00000151422.2|OTTHUMT00000523009.1|ENST00000655406|ENSG00000236106|2021	2.021	0	0	0	0	0	2	2	0.989609	0	0	0	0	0	0	0	0	0	0	0	0	0	0	0	0	0	0	0	0	0	0
ENST00000655656.1|ENSG00000287299.1|OTTHUMG00000195798.1|OTTHUMT00000528799.1|ENST00000655656|ENSG00000287299|5059	5.059	1	0	0	0	0	1	2	0.395335	0.0122451	0	0	0.0116905	0	0	0	0	0	0	0	0	0	0	0	0	0	0	0	0	0	0
ENST00000655657.3|ENSG00000231999.8|OTTHUMG00000010130.7|OTTHUMT00000528229.1|LRRC8C-DT-205|LRRC8C-DT|2834	2.834	0	0	1	0	0	1	2	0.705716	NA	NA	NA	NA	NA	NA	NA	NA	NA	NA	NA	NA	NA	NA	NA	NA	NA	NA	NA	NA	NA	NA
ENST00000655826.1|ENSG00000286435.1|OTTHUMG00000193997.1|OTTHUMT00000508411.1|ENST00000655826|ENSG00000286435|1233	1.233	0	0	1	1	0	0	2	1.62206	0	0	0	0.0327852	0	0.247234	0.0210539	0	0	0	0	0	0	0	0	0	0	0	0	0	0	0
ENST00000655888.1|ENSG00000288584.1|OTTHUMG00000015979.14|OTTHUMT00000527574.1|ENST00000655888|ENSG00000288584|2595	2.595	0	1	0	0	0	1	2	0.770713	0	0	0	0	0.055489	0	0	0	0.0430491	0.0547841	0	0	0	0	0	0	0	0	0	0	0	0
ENST00000656081.1|ENSG00000286388.1|OTTHUMG00000195493.1|OTTHUMT00000527196.1|ENST00000656081|ENSG00000286388|3302	3.302	0	0	0	2	0	0	2	0.605694	0.679065	0.566919	1.30903	0.758426	1.62244	6.11859	0.219728	0.830208	5.5656	2.66078	0.331925	0	0.00918105	0	1.04987	0.461024	2.45212	0.609447	0.594848	0.12385	0.569108	0.397423
ENST00000656133.1|ENSG00000258017.3|OTTHUMG00000170411.2|OTTHUMT00000526255.1|ENST00000656133|ENSG00000258017|675	0.675	0	0	1	1	0	0	2	2.96296	NA	NA	NA	NA	NA	NA	NA	NA	NA	NA	NA	NA	NA	NA	NA	NA	NA	NA	NA	NA	NA	NA
ENST00000656462.1|ENSG00000215256.6|OTTHUMG00000171901.5|OTTHUMT00000523018.1|DHRS4-AS1-208|DHRS4-AS1|2609	2.609	0	0	0	0	1	1	2	0.766577	NA	NA	NA	NA	NA	NA	NA	NA	NA	NA	NA	NA	NA	NA	NA	NA	NA	NA	NA	NA	NA	NA
ENST00000656724.1|ENSG00000286546.1|OTTHUMG00000195080.1|OTTHUMT00000524302.1|ENST00000656724|ENSG00000286546|2297	2.297	0	0	0	0	0	2	2	0.870701	0.0167952	0	0	0	0	0	0	0	0	0	0	0	0	0	0.0618616	0.0771914	0.0881068	0	0	0.020394	0	0
ENST00000656834.1|ENSG00000288017.1|OTTHUMG00000194838.1|OTTHUMT00000522522.1|ENST00000656834|ENSG00000288017|1611	1.611	1	0	0	0	0	1	2	1.24146	0	0	0	0	0	0	0	0	0	0	0	0	0	0	0	0	0	0	0	0.00455495	0.0529395	0.023817
ENST00000656939.1|ENSG00000287126.1|OTTHUMG00000195597.1|OTTHUMT00000527691.1|ENST00000656939|ENSG00000287126|3700	3.7	0	0	0	2	0	0	2	0.540541	0.0771992	0.0895018	0.0445832	0.0348403	0.359164	0.181854	0.172041	0.134385	0.0738621	0.197976	0.180179	0.0711852	0.294047	0	0.112881	0.662611	0.548518	0.348844	1.16359	0.860393	1.13493	0.649397
ENST00000657188.1|ENSG00000286766.1|OTTHUMG00000195575.1|OTTHUMT00000527578.1|ENST00000657188|ENSG00000286766|2561	2.561	0	0	0	0	0	2	2	0.780945	0	0	0	0	0	0	0	0	0.0874472	0	0	0	0	0	0	0	0	0	0	0	0	0
ENST00000657267.1|ENSG00000203335.5|OTTHUMG00000184017.14|OTTHUMT00000519398.1|ENST00000657267|ENSG00000203335|1058	1.058	0	0	1	1	0	0	2	1.89036	0	0	0	0	0	0	0	0	0	0	0	0	0	0	0	0	0	0	0	0	0	0
ENST00000657382.1|ENSG00000230844.3|OTTHUMG00000021424.3|OTTHUMT00000521091.1|ZNF674-AS1-203|ZNF674-AS1|2566	2.566	0	0	0	0	0	2	2	0.779423	2.05964	2.72296	3.1881	3.168	13.2739	6.93582	10.3286	4.82919	7.27708	6.16773	6.92882	9.49707	9.13457	9.8985	2.26936	3.81728	6.0799	5.50946	6.8551	7.29027	9.90183	9.50557
ENST00000657432.1|ENSG00000286524.1|OTTHUMG00000195810.1|OTTHUMT00000528881.1|ENST00000657432|ENSG00000286524|1670	1.67	1	0	0	0	0	1	2	1.1976	0	0	0	0	0	0	0	0	0	0	0	0	0	0	0.0444778	0	0	0	0	0	0	0
ENST00000657921.1|ENSG00000287644.1|OTTHUMG00000194678.1|OTTHUMT00000520574.1|ENST00000657921|ENSG00000287644|669	0.669	0	0	1	1	0	0	2	2.98954	0	0	0	0	0	0	0	0	0	0	0	0	0	0	0	0	0	0	0	0	0	0
ENST00000658214.1|ENSG00000287120.1|OTTHUMG00000194855.1|OTTHUMT00000522634.1|ENST00000658214|ENSG00000287120|3073	3.073	0	0	0	0	0	2	2	0.65083	0	0	0	0	0	0	0	0	0	0	0	0	0	0	0	0	0	0	0	0	0	0
ENST00000658390.1|ENSG00000286944.1|OTTHUMG00000195011.1|OTTHUMT00000523726.1|ENST00000658390|ENSG00000286944|3583	3.583	0	0	0	0	0	2	2	0.558191	0	0	0	0	0	0	0	0	0	0	0	0	0	0.0452084	0	0	0	0	0	0	0	0
ENST00000658513.1|ENSG00000286886.1|OTTHUMG00000194609.1|OTTHUMT00000519659.1|ENST00000658513|ENSG00000286886|3765	3.765	0	0	1	0	1	0	2	0.531208	0	0	0	0	0	0	0	0	0	0	0	0	0	0	0	0	0	0	0	0	0	0
ENST00000658591.1|ENSG00000286989.1|OTTHUMG00000195682.1|OTTHUMT00000528199.1|ENST00000658591|ENSG00000286989|1830	1.83	0	0	1	1	0	0	2	1.0929	0.0792788	0.630759	0	0.310093	0	0	0.23433	0.276789	0	0	0.156461	0	0.00874894	0.151118	0	0.0338584	0	0	0	0.125551	0	0.0718683
ENST00000658594.1|ENSG00000243818.7|OTTHUMG00000159310.23|OTTHUMT00000524936.1|ENST00000658594|ENSG00000243818|1397	1.397	0	0	0	0	0	2	2	1.43164	NA	NA	NA	NA	NA	NA	NA	NA	NA	NA	NA	NA	NA	NA	NA	NA	NA	NA	NA	NA	NA	NA
ENST00000658597.1|ENSG00000253877.6|OTTHUMG00000164908.26|OTTHUMT00000507551.1|LINC01608-210|LINC01608|916	0.916	0	0	0	0	0	2	2	2.18341	NA	NA	NA	NA	NA	NA	NA	NA	NA	NA	NA	NA	NA	NA	NA	NA	NA	NA	NA	NA	NA	NA
ENST00000658746.1|ENSG00000286543.1|OTTHUMG00000195210.1|OTTHUMT00000525314.1|ENST00000658746|ENSG00000286543|2775	2.775	0	0	0	0	0	2	2	0.720721	0	0.0597936	0	0	0	0	0	0	0	0	0	0	0	0	0	0	0	0	0	0	0	0
ENST00000658759.1|ENSG00000227811.3|OTTHUMG00000011954.3|OTTHUMT00000033061.2|INKA2-AS1-203|INKA2-AS1|2393	2.393	0	0	1	1	0	0	2	0.835771	0	0	0.00778766	0	0.0376641	0	0.0713074	0	0	0	0.202824	0	0.110104	0.270129	0.0974997	0.108883	0	0	0.239795	0.265565	0	0.176942
ENST00000658766.1|ENSG00000241764.5|OTTHUMG00000154805.7|OTTHUMT00000525172.1|CBLL1-AS1-205|CBLL1-AS1|3516	3.516	0	0	0	0	0	2	2	0.568828	0.271829	0.514031	0	0.0543537	0	0	0.0815301	0.0482639	0	0.914785	0.223469	0.470802	0	0	0	0.0449147	0	0	0	0	0.0427098	0.204037
ENST00000658889.1|ENSG00000229321.2|OTTHUMG00000154733.6|OTTHUMT00000528476.1|ENST00000658889|ENSG00000229321|3875	3.875	0	0	0	0	0	2	2	0.516129	0.0443234	0.0491178	0.0814055	0.253341	0.534972	0.168342	0.00517553	0.00689383	2.55702	2.29047	2.09307	1.58676	1.07648	1.47801	0.162042	0.074664	3.9998	5.79356	5.4437	8.36277	4.2649	4.19966
ENST00000658903.1|ENSG00000287105.1|OTTHUMG00000195647.1|OTTHUMT00000527955.1|ENST00000658903|ENSG00000287105|3342	3.342	0	1	0	0	0	1	2	0.598444	0	0	0	0	0	0	0	0	0	0	0	0	0	0	0	0	0	0	0	0	0	0
ENST00000658962.1|ENSG00000287258.1|OTTHUMG00000195476.1|OTTHUMT00000527146.1|ENST00000658962|ENSG00000287258|2553	2.553	0	0	1	1	0	0	2	0.783392	0	0	0	0	0	0	0	0	0	0	0	0	0	0	0	0	0	0	0	0	0	0
ENST00000659033.1|ENSG00000286953.1|OTTHUMG00000195503.1|OTTHUMT00000527241.1|ENST00000659033|ENSG00000286953|3635	3.635	0	0	0	0	0	2	2	0.550206	0	0	0.00470776	0	0	0	0	0	0	0	0	0	0	0	0	0	0	0	0	0	0	0
ENST00000659081.2|ENSG00000286760.3|OTTHUMG00000195184.1|OTTHUMT00000525112.1|ENST00000659081|ENSG00000286760|3910	3.91	0	0	0	0	0	2	2	0.511509	0.144885	0.122622	0.0400852	0	0	0	0.25313	0.0958676	0	0	0.0974505	0.328724	0.164341	0.337584	0.107798	0.355323	0.0997378	0.336372	1.43757	1.40017	1.44917	2.21328
ENST00000659528.3|ENSG00000233184.9|OTTHUMG00000010831.10|OTTHUMT00000528395.1|DPH5-DT-215|DPH5-DT|3992	3.992	0	0	0	0	0	2	2	0.501002	0.012558	0	0	0	0	0	0	0.0249347	0	0	0	0	0	0	0	0.0182521	0	0	0	0	0	0
ENST00000659573.1|ENSG00000286876.1|OTTHUMG00000194772.1|OTTHUMT00000521775.1|ENST00000659573|ENSG00000286876|2234	2.234	0	0	0	0	0	2	2	0.895255	0	0	0	0	0	0	0	0	0	0	0	0	0	0	0	0	0	0	0	0	0	0
ENST00000659702.1|ENSG00000206187.4|OTTHUMG00000171719.11|OTTHUMT00000513180.1|LINC02346-206|LINC02346|1583	1.583	0	0	0	1	0	1	2	1.26342	0	0	0	0	0	0	0	0	0	0	0	0	0	0	0	0	0	0	0	0	0	0
ENST00000659704.1|ENSG00000286457.1|OTTHUMG00000195377.1|OTTHUMT00000526686.1|ENST00000659704|ENSG00000286457|1997	1.997	0	0	0	0	0	2	2	1.0015	0	0	0.0100419	0	0.105441	0.0842694	0	0	0	0	0	0	0	0	0	0	0	0	0	0.0103751	0	0
ENST00000659730.1|ENSG00000287559.1|OTTHUMG00000195323.1|OTTHUMT00000526302.1|ENST00000659730|ENSG00000287559|3543	3.543	1	0	0	0	0	1	2	0.564493	0	0	0	0.00744946	0.0054122	0	0	0	0	0	0	0	0	0	0	0	0	0	0	0	0	0
ENST00000659920.1|ENSG00000228484.3|OTTHUMG00000019090.7|OTTHUMT00000515512.1|ENST00000659920|ENSG00000228484|720	0.72	1	0	0	0	0	1	2	2.77778	0	0	0	0	0	0	0	0	0	0	0	0	0	0	0	0	0	0	0	0	0	0
ENST00000659982.3|ENSG00000268038.5|OTTHUMG00000182985.5|OTTHUMT00000511683.1|LINC01785-203|LINC01785|1127	1.127	0	0	1	1	0	0	2	1.77462	NA	NA	NA	NA	NA	NA	NA	NA	NA	NA	NA	NA	NA	NA	NA	NA	NA	NA	NA	NA	NA	NA
ENST00000660031.1|ENSG00000287692.1|OTTHUMG00000195568.1|OTTHUMT00000527564.1|ENST00000660031|ENSG00000287692|4507	4.507	0	0	0	0	0	2	2	0.443754	0.102715	0	0.0733477	0	0	0	0.68257	0.35764	0	0.165654	0.41581	1.60669	0.441514	0.419767	0	0	0.0391445	0.138316	0.014186	0.029139	0	0.0241864
ENST00000660050.1|ENSG00000226900.2|OTTHUMG00000019290.7|OTTHUMT00000503072.2|ENST00000660050|ENSG00000226900|1342	1.342	0	0	0	0	0	2	2	1.49031	0.174548	0.00153658	0.0156984	0.0233572	0.149346	0	0.0733897	0	0	0	0.136715	0	0	0	0.297249	0.255545	0.48763	0.184461	1.67445	1.73387	1.65312	2.63669
ENST00000660390.1|ENSG00000287963.1|OTTHUMG00000195186.1|OTTHUMT00000525143.1|ENST00000660390|ENSG00000287963|4456	4.456	0	0	0	0	0	2	2	0.448833	0.00610978	0.0056215	0	0	0.11983	0.0401326	0	0	0	0.0181682	0	0.0130664	0	0.00299981	0	0	0.0440794	0.0248475	0	0.00926613	0.0102884	0
ENST00000660555.1|ENSG00000286596.1|OTTHUMG00000193816.1|OTTHUMT00000505007.1|ENST00000660555|ENSG00000286596|2345	2.345	0	0	0	2	0	0	2	0.852878	0	0	0	0	0	0	0	0	0	0	0	0	0	0	0	0	0	0	0	0	0	0
ENST00000660614.2|ENSG00000287209.2|OTTHUMG00000194932.1|OTTHUMT00000523221.1|ENST00000660614|ENSG00000287209|1578	1.578	0	0	0	0	1	1	2	1.26743	0	0	0	0	0	0	0	0	0	0	0	0	0	0	0	0	0	0	0	0	0	0
ENST00000660664.1|ENSG00000287145.1|OTTHUMG00000195835.1|OTTHUMT00000528965.1|ENST00000660664|ENSG00000287145|2260	2.26	0	0	1	1	0	0	2	0.884956	0	0	0	0	0	0	0	0	0	0	0	0	0	0	0	0	0	0	0	0	0	0
[truncated: 13,930 more rows]
