# Supplementary material
Source: HighWire-hosted journal article supplement (doi:10.1101/rna.080188.124)
Supplement: Supplemental_Table_S3.xlsx [file Supplemental_Table_S3.xlsx]

## Sheet: Legend
Legend for both tables
human_full_ID	GENCODE transcript and gene IDs,
mouse_full_ID	GENCODE transcript and gene IDs,
human_tlen	length of human transcript
mouse_tlen	length of mouse transcript
human_vs_mouse_rval	SEEKR-derived r value of human-mouse pair
human_vs_mouse_pval	SEEKR-derived p value of human-mouse pair
human_vs_rA_fragmentcount	number of significant XIST Repeat A-like fragments in human lncRNA
human_vs_rF_fragmentcount	number of significant XIST Repeat F-like fragments in human lncRNA
human_vs_rB1_fragmentcount	number of significant XIST Repeat B1-like fragments in human lncRNA
human_vs_rB2_fragmentcount	number of significant XIST Repeat B2-like fragments in human lncRNA
human_vs_rD_fragmentcount	number of significant XIST Repeat D-like fragments in human lncRNA
human_vs_rE_fragmentcount	number of significant XIST Repeat E-like fragments in human lncRNA
human_vs_XIST_total_fragmentcount	total number of significant XIST Repeat-like fragments in human lncRNA
mouse_vs_rA_fragmentcount	number of significant XIST Repeat A-like fragments in mouse lncRNA
mouse_vs_rF_fragmentcount	number of significant XIST Repeat F-like fragments in mouse lncRNA
mouse_vs_rB1_fragmentcount	number of significant XIST Repeat B1-like fragments in mouse lncRNA
mouse_vs_rB2_fragmentcount	number of significant XIST Repeat B2-like fragments in mouse lncRNA
mouse_vs_rD_fragmentcount	number of significant XIST Repeat D-like fragments in mouse lncRNA
mouse_vs_rE_fragmentcount	number of significant XIST Repeat E-like fragments in mouse lncRNA
mouse_vs_XIST_total_fragmentcount	total number of significant XIST Repeat-like fragments in mouse lncRNA

## Sheet: HM-lncRNAs
human_full_ID	mouse_full_ID	human_tlen	mouse_tlen	human_vs_mouse_rval	human_vs_mouse_pval	human_vs_rA_fragmentcount	human_vs_rF_fragmentcount	human_vs_rB1_fragmentcount	human_vs_rB2_fragmentcount	human_vs_rD_fragmentcount	human_vs_rE_fragmentcount	human_vs_XIST_total_fragmentcount	mouse_vs_rA_fragmentcount	mouse_vs_rF_fragmentcount	mouse_vs_rB1_fragmentcount	mouse_vs_rB2_fragmentcount	mouse_vs_rD_fragmentcount	mouse_vs_rE_fragmentcount	mouse_vs_XIST_total_fragmentcount
ENST00000412085.1|ENSG00000233825.1|OTTHUMG00000017924.1|OTTHUMT00000047480.1|RP11-135A24.4-001|RP11-135A24.4|383|	ENSMUST00000189675.1|ENSMUSG00000101320.1|OTTMUSG00000046942.1|OTTMUST00000121668.1|Gm28529-002|Gm28529|670|	383	670	0.668765	0	0	0	1	0	0	0	1	0	0	1	1	0	0	2
ENST00000417354.2|ENSG00000230630.3|OTTHUMG00000040855.3|OTTHUMT00000098131.3|DNM3OS-001|DNM3OS|4358|	ENSMUST00000139662.1|ENSMUSG00000078190.6|OTTMUSG00000029470.5|OTTMUST00000073023.2|Dnm3os-001|Dnm3os|7928|	4358	7928	0.445371	0	3	0	0	0	1	2	6	0	0	2	1	0	4	7
ENST00000500197.6|ENSG00000245526.9|OTTHUMG00000162632.4|OTTHUMT00000369801.1|LINC00461-003|LINC00461|3381|	ENSMUST00000131907.8|ENSMUSG00000050334.12|OTTMUSG00000033681.4|OTTMUST00000084855.2|C130071C03Rik-001|C130071C03Rik|3590|	3381	3590	0.482222	0	1	1	0	0	0	0	2	1	0	0	0	0	2	3
ENST00000450669.2|ENSG00000230967.2|OTTHUMG00000018931.2|OTTHUMT00000049935.2|RP11-107I14.5-001|RP11-107I14.5|522|	ENSMUST00000187795.1|ENSMUSG00000100417.1|OTTMUSG00000047248.1|OTTMUST00000122163.1|Gm28578-003|Gm28578|664|	522	664	0.53762	0	0	0	1	1	0	0	2	0	0	1	1	0	0	2
ENST00000624566.1|ENSG00000278915.1|OTTHUMG00000189138.1|OTTHUMT00000478933.1|AC005609.18-001|AC005609.18|577|	ENSMUST00000192178.1|ENSMUSG00000103384.1|OTTMUSG00000050609.1|OTTMUST00000128319.1|Gm37753-001|Gm37753|439|	577	439	0.477265	0	0	0	1	0	0	0	1	0	0	0	0	0	0	0
ENST00000559590.1|ENSG00000259675.1|OTTHUMG00000171939.1|OTTHUMT00000415995.1|RP11-507B12.1-002|RP11-507B12.1|395|	ENSMUST00000186992.1|ENSMUSG00000101345.1|OTTMUSG00000047481.1|OTTMUST00000122544.1|Gm28195-001|Gm28195|372|	395	372	0.481297	0	0	0	0	0	0	0	0	0	0	0	0	0	0	0
ENST00000559303.2|ENSG00000259589.2|OTTHUMG00000172434.2|OTTHUMT00000418538.2|RP11-317G6.1-001|RP11-317G6.1|580|	ENSMUST00000186450.1|ENSMUSG00000100130.1|OTTMUSG00000046472.1|OTTMUST00000120964.1|Gm28379-001|Gm28379|554|	580	554	0.691713	0	0	0	0	0	0	0	0	0	0	1	0	0	0	1
ENST00000435389.5|ENSG00000232046.6|OTTHUMG00000152838.2|OTTHUMT00000328219.1|AC007392.3-005|AC007392.3|546|	ENSMUST00000190769.1|ENSMUSG00000099449.1|OTTMUSG00000047434.1|OTTMUST00000122482.1|Gm28401-001|Gm28401|550|	546	550	0.514724	0	0	0	0	0	0	0	0	0	0	0	0	0	0	0
ENST00000514287.1|ENSG00000250635.1|OTTHUMG00000163330.1|OTTHUMT00000372743.1|CTD-3224K15.2-001|CTD-3224K15.2|577|	ENSMUST00000188160.1|ENSMUSG00000100320.1|OTTMUSG00000047844.1|OTTMUST00000123106.1|Gm29417-001|Gm29417|571|	577	571	0.46976	0	1	0	2	1	0	0	4	0	0	1	2	0	0	3
ENST00000448344.1|ENSG00000231485.1|OTTHUMG00000009304.1|OTTHUMT00000025777.1|RP4-535B20.1-001|RP4-535B20.1|310|	ENSMUST00000189920.1|ENSMUSG00000086782.2|OTTMUSG00000008464.2|OTTMUST00000120161.1|E130102H24Rik-002|E130102H24Rik|329|	310	329	0.598247	0	0	0	0	0	0	0	0	0	1	0	0	0	0	1
ENST00000624176.1|ENSG00000279726.1|OTTHUMG00000189135.1|OTTHUMT00000478930.1|AC005609.16-002|AC005609.16|513|	ENSMUST00000192178.1|ENSMUSG00000103384.1|OTTMUSG00000050609.1|OTTMUST00000128319.1|Gm37753-001|Gm37753|439|	513	439	0.440575	0	0	0	2	1	0	0	3	0	0	0	0	0	0	0
ENST00000449075.1|ENSG00000226856.5|OTTHUMG00000153418.1|OTTHUMT00000331098.1|AC093901.1-002|AC093901.1|580|	ENSMUST00000191007.1|ENSMUSG00000101700.1|OTTMUSG00000047672.1|OTTMUST00000122862.1|Gm29359-001|Gm29359|495|	580	495	0.690745	0	0	0	0	0	0	0	0	0	0	0	0	0	0	0
ENST00000455871.1|ENSG00000234306.1|OTTHUMG00000017657.1|OTTHUMT00000046740.1|RP11-271F18.1-001|RP11-271F18.1|335|	ENSMUST00000187783.1|ENSMUSG00000099424.1|OTTMUSG00000047521.1|OTTMUST00000122607.1|Gm28641-001|Gm28641|335|	335	335	0.491719	0	0	0	0	0	0	0	0	0	0	0	0	0	0	0
ENST00000429060.1|ENSG00000230939.1|OTTHUMG00000014225.1|OTTHUMT00000039803.1|RP11-314C16.1-001|RP11-314C16.1|489|	ENSMUST00000195312.1|ENSMUSG00000103605.1|OTTMUSG00000047411.1|OTTMUST00000122443.1|Gm38206-001|Gm38206|363|	489	363	0.492879	0	0	0	0	0	0	0	0	0	0	0	0	0	1	1
ENST00000613093.1|ENSG00000274292.1|OTTHUMG00000169079.2|OTTHUMT00000402182.2|RP11-347I19.7-001|RP11-347I19.7|2607|	ENSMUST00000195992.1|ENSMUSG00000105881.1|OTTMUSG00000043109.2|OTTMUST00000113145.2|4932422M17Rik-001|4932422M17Rik|2639|	2607	2639	0.476249	0	2	0	4	3	0	0	9	0	0	0	2	0	0	2
ENST00000438963.1|ENSG00000229066.1|OTTHUMG00000154232.1|OTTHUMT00000334503.1|AC096649.3-002|AC096649.3|768|	ENSMUST00000190918.1|ENSMUSG00000099502.1|OTTMUSG00000047527.1|OTTMUST00000122629.1|Gm28640-001|Gm28640|550|	768	550	0.524479	0	0	0	0	0	0	0	0	0	0	0	0	0	0	0
ENST00000552367.1|ENSG00000257453.1|OTTHUMG00000169784.1|OTTHUMT00000405848.1|RP11-290L1.3-001|RP11-290L1.3|569|	ENSMUST00000186844.1|ENSMUSG00000100113.1|OTTMUSG00000045679.1|OTTMUST00000119594.1|Gm28592-001|Gm28592|741|	569	741	0.457825	0	0	0	0	1	0	0	1	1	0	0	1	0	0	2
ENST00000431656.1|ENSG00000229307.1|OTTHUMG00000017015.1|OTTHUMT00000045187.1|LINC00459-001|LINC00459|376|	ENSMUST00000192706.1|ENSMUSG00000102164.1|OTTMUSG00000047334.1|OTTMUST00000122341.1|Gm36946-001|Gm36946|435|	376	435	0.445053	0	0	0	0	0	0	1	1	0	0	0	0	0	0	0
ENST00000562952.1|ENSG00000261654.1|OTTHUMG00000175996.1|OTTHUMT00000431363.1|RP11-96K19.4-001|RP11-96K19.4|5985|	ENSMUST00000194058.1|ENSMUSG00000102780.1|OTTMUSG00000052102.1|OTTMUST00000130979.1|Gm38253-001|Gm38253|4678|	5985	4678	0.44094	0	7	0	0	0	1	9	17	2	0	1	1	1	5	10
ENST00000560769.1|ENSG00000259279.1|OTTHUMG00000172463.1|OTTHUMT00000418667.1|CTD-2033D15.1-001|CTD-2033D15.1|281|	ENSMUST00000190311.1|ENSMUSG00000101859.1|OTTMUSG00000047539.1|OTTMUST00000122644.1|Gm29233-001|Gm29233|281|	281	281	0.512647	0	0	0	0	0	0	0	0	0	0	0	0	0	0	0
ENST00000419364.1|ENSG00000236502.1|OTTHUMG00000152423.1|OTTHUMT00000326190.1|SIX3-AS1-001|SIX3-AS1|844|	ENSMUST00000188560.1|ENSMUSG00000099635.1|OTTMUSG00000046941.1|OTTMUST00000121666.1|Gm28528-001|Gm28528|857|	844	857	0.517302	0	0	0	0	0	0	0	0	0	0	1	0	0	0	1
ENST00000478301.1|ENSG00000241295.1|OTTHUMG00000159363.1|OTTHUMT00000354946.1|ZBTB20-AS2-001|ZBTB20-AS2|372|	ENSMUST00000192064.1|ENSMUSG00000102967.1|OTTMUSG00000047833.2|OTTMUST00000123089.2|Gm37946-001|Gm37946|347|	372	347	0.433842	1.11e-16	0	0	0	0	0	0	0	0	0	0	0	0	0	0
ENST00000429829.5|ENSG00000229807.10|OTTHUMG00000021839.5|OTTHUMT00000057239.1|XIST-001|XIST|19275|	ENSMUST00000127786.2|ENSMUSG00000086503.3|OTTMUSG00000018295.4|OTTMUST00000044201.3|Xist-001|Xist|17769|	19275	17769	0.432265	1.11e-16	4	3	7	5	13	15	47	6	4	3	4	7	10	34
ENST00000501169.2|ENSG00000248079.2|OTTHUMG00000172347.1|OTTHUMT00000418019.1|DPH6-AS1-001|DPH6-AS1|1477|	ENSMUST00000190899.1|ENSMUSG00000099361.1|OTTMUSG00000047322.1|OTTMUST00000122324.1|Gm28492-001|Gm28492|1019|	1477	1019	0.438216	1.11e-16	0	0	0	0	0	1	1	0	0	0	0	0	1	1
ENST00000452971.1|ENSG00000238063.2|OTTHUMG00000000481.2|OTTHUMT00000001204.2|RP11-329N22.1-001|RP11-329N22.1|790|	ENSMUST00000193103.1|ENSMUSG00000103541.1|OTTMUSG00000047732.1|OTTMUST00000122947.1|Gm37667-001|Gm37667|752|	790	752	0.437351	1.11e-16	0	0	0	0	0	0	0	0	0	0	0	0	0	0
ENST00000437777.1|ENSG00000234767.1|OTTHUMG00000017032.1|OTTHUMT00000045206.1|LINC01052-001|LINC01052|496|	ENSMUST00000194680.1|ENSMUSG00000103410.1|OTTMUSG00000047333.1|OTTMUST00000122340.1|Gm37341-001|Gm37341|371|	496	371	0.429951	2.22e-16	0	0	0	0	0	0	0	0	0	0	0	0	0	0
ENST00000443966.2|ENSG00000235590.7|OTTHUMG00000060481.5|OTTHUMT00000080426.2|GNAS-AS1-002|GNAS-AS1|2341|	ENSMUST00000143738.1|ENSMUSG00000086537.7|OTTMUSG00000016620.1|OTTMUST00000040200.1|Nespas-003|Nespas|1083|	2341	1083	0.426103	3.33e-16	1	0	0	0	0	0	1	1	1	1	0	0	0	3
ENST00000524320.1|ENSG00000254010.1|OTTHUMG00000165044.1|OTTHUMT00000381544.1|RP11-103H7.5-001|RP11-103H7.5|484|	ENSMUST00000186605.1|ENSMUSG00000097493.3|OTTMUSG00000047162.2|OTTMUST00000122001.1|9930014A18Rik-004|9930014A18Rik|486|	484	486	0.413264	1.44e-15	1	0	1	0	0	0	2	1	0	0	0	0	0	1
ENST00000512859.1|ENSG00000249483.1|OTTHUMG00000162555.1|OTTHUMT00000369544.1|CTD-2249K22.1-001|CTD-2249K22.1|601|	ENSMUST00000181054.2|ENSMUSG00000097182.2|OTTMUSG00000046952.1|OTTMUST00000121685.1|A830009L08Rik-001|A830009L08Rik|2807|	601	2807	0.410318	2.11e-15	0	0	0	1	0	0	1	0	1	1	1	0	0	3
ENST00000313737.5|ENSG00000177340.5|OTTHUMG00000187470.1|OTTHUMT00000475045.1|FLJ13224-001|FLJ13224|1514|	ENSMUST00000154673.1|ENSMUSG00000085355.2|OTTMUSG00000024044.1|OTTMUST00000058783.1|3010003L21Rik-001|3010003L21Rik|1747|	1514	1747	0.409487	2.33e-15	2	0	4	4	0	0	10	1	0	2	2	0	0	5
ENST00000602918.1|ENSG00000256092.2|OTTHUMG00000168679.2|OTTHUMT00000467685.1|RP13-942N8.1-002|RP13-942N8.1|1920|	ENSMUST00000192265.1|ENSMUSG00000103864.1|OTTMUSG00000047774.1|OTTMUST00000123005.1|Gm37415-001|Gm37415|2054|	1920	2054	0.408155	2.66e-15	0	0	3	4	0	0	7	1	0	4	3	0	0	8
ENST00000581816.1|ENSG00000215417.11|OTTHUMG00000017195.3|OTTHUMT00000442498.1|MIR17HG-003|MIR17HG|2032|	ENSMUST00000134140.2|ENSMUSG00000089726.2|OTTMUSG00000033261.3|OTTMUST00000083388.3|Mir17hg-001|Mir17hg|3536|	2032	3536	0.407902	2.78e-15	0	1	0	0	0	1	2	2	1	0	0	0	2	5
ENST00000608811.1|ENSG00000237863.2|OTTHUMG00000022180.2|OTTHUMT00000471734.1|RP6-24A23.3-002|RP6-24A23.3|551|	ENSMUST00000139874.1|ENSMUSG00000086426.1|OTTMUSG00000019788.1|OTTMUST00000047329.1|Gm15295-001|Gm15295|488|	551	488	0.40555	3.66e-15	0	0	1	0	0	0	1	0	0	0	0	0	0	0
ENST00000452622.1|ENSG00000223855.1|OTTHUMG00000151410.1|OTTHUMT00000322522.1|HRAT92-001|HRAT92|3506|	ENSMUST00000100518.2|ENSMUSG00000075585.3|OTTMUSG00000048600.1|-|6330403L08Rik-201|6330403L08Rik|5521|	3506	5521	0.404248	4.33e-15	0	0	6	3	0	0	9	1	0	7	7	0	0	15
ENST00000484675.1|ENSG00000243089.1|OTTHUMG00000159413.1|OTTHUMT00000355168.1|RP11-779P15.2-001|RP11-779P15.2|465|	ENSMUST00000194055.1|ENSMUSG00000104285.1|OTTMUSG00000047834.1|OTTMUST00000123090.1|Gm37458-001|Gm37458|410|	465	410	0.403491	4.66e-15	0	0	0	0	0	0	0	0	0	0	0	0	0	0
ENST00000426194.1|ENSG00000228835.1|OTTHUMG00000154695.2|OTTHUMT00000336609.2|AC012123.1-001|AC012123.1|1661|	ENSMUST00000132729.7|ENSMUSG00000043168.12|OTTMUSG00000029782.4|OTTMUST00000085844.1|4930426D05Rik-005|4930426D05Rik|655|	1661	655	0.398412	8.55e-15	1	0	1	0	0	2	4	1	0	0	0	0	0	1
ENST00000608450.1|ENSG00000272768.1|OTTHUMG00000186249.1|OTTHUMT00000472495.1|RP4-673M15.1-001|RP4-673M15.1|1441|	ENSMUST00000127488.1|ENSMUSG00000086839.7|OTTMUSG00000005114.1|OTTMUST00000011443.1|Gm11973-002|Gm11973|468|	1441	468	0.394926	1.3e-14	2	0	2	2	0	0	6	1	0	0	1	0	0	2
ENST00000625195.1|ENSG00000278901.1|OTTHUMG00000189139.1|OTTHUMT00000478934.1|AC005609.17-001|AC005609.17|617|	ENSMUST00000192178.1|ENSMUSG00000103384.1|OTTMUSG00000050609.1|OTTMUST00000128319.1|Gm37753-001|Gm37753|439|	617	439	0.394581	1.35e-14	1	0	1	1	0	0	3	0	0	0	0	0	0	0
ENST00000603284.1|ENSG00000270866.1|OTTHUMG00000184924.1|OTTHUMT00000469341.1|RP11-706J10.2-001|RP11-706J10.2|1094|	ENSMUST00000184429.1|ENSMUSG00000098659.7|OTTMUSG00000044897.2|OTTMUST00000117997.1|1110015O18Rik-003|1110015O18Rik|469|	1094	469	0.392967	1.64e-14	1	0	0	0	0	1	2	0	0	0	0	0	0	0
ENST00000447728.1|ENSG00000231754.2|OTTHUMG00000014342.2|OTTHUMT00000039989.2|RP11-204E9.1-001|RP11-204E9.1|543|	ENSMUST00000146336.1|ENSMUSG00000086363.7|OTTMUSG00000000659.1|OTTMUST00000001276.1|A330102I10Rik-002|A330102I10Rik|517|	543	517	0.392512	1.73e-14	0	0	0	0	0	0	0	0	0	0	0	0	0	0
ENST00000519077.3|ENSG00000253352.8|OTTHUMG00000030444.4|OTTHUMT00000431951.2|TUG1-006|TUG1|5673|	ENSMUST00000132077.2|ENSMUSG00000056579.17|OTTMUSG00000005033.3|OTTMUST00000011198.2|Tug1-002|Tug1|6709|	5673	6709	0.390779	2.12e-14	2	0	0	0	0	2	4	2	0	1	0	0	2	5
ENST00000566942.1|ENSG00000259834.1|OTTHUMG00000175965.1|OTTHUMT00000431321.1|RP11-284N8.3-001|RP11-284N8.3|3481|	ENSMUST00000194058.1|ENSMUSG00000102780.1|OTTMUSG00000052102.1|OTTMUST00000130979.1|Gm38253-001|Gm38253|4678|	3481	4678	0.383481	5.02e-14	1	0	0	0	0	3	4	2	0	1	1	1	5	10
ENST00000557368.1|ENSG00000258444.1|OTTHUMG00000171500.1|OTTHUMT00000413781.1|CTD-2201G16.1-001|CTD-2201G16.1|207|	ENSMUST00000187147.1|ENSMUSG00000101680.1|OTTMUSG00000047226.1|OTTMUST00000122120.1|Gm29015-001|Gm29015|207|	207	207	0.381198	6.55e-14	0	0	0	0	0	0	0	0	0	0	0	0	0	0
ENST00000500949.6|ENSG00000247556.6|OTTHUMG00000172547.3|OTTHUMT00000419058.1|OIP5-AS1-001|OIP5-AS1|8829|	ENSMUST00000153581.1|ENSMUSG00000085438.1|OTTMUSG00000015950.1|OTTMUST00000037909.1|1700020I14Rik-001|1700020I14Rik|8300|	8829	8300	0.380792	6.87e-14	1	0	0	0	0	4	5	2	0	0	1	0	2	5
ENST00000413525.1|ENSG00000232606.1|OTTHUMG00000153876.1|OTTHUMT00000332781.1|LINC01412-001|LINC01412|362|	ENSMUST00000188811.1|ENSMUSG00000100135.1|OTTMUSG00000047523.1|OTTMUST00000122609.1|Gm28643-001|Gm28643|356|	362	356	0.373849	1.54e-13	0	0	0	0	0	0	0	0	0	0	0	0	0	0
ENST00000413941.1|ENSG00000226861.1|OTTHUMG00000017646.1|OTTHUMT00000046729.1|RP5-1119O21.2-001|RP5-1119O21.2|901|	ENSMUST00000191950.1|ENSMUSG00000104276.1|OTTMUSG00000047522.1|OTTMUST00000122608.1|Gm37866-001|Gm37866|696|	901	696	0.370486	2.28e-13	0	0	0	0	0	0	0	0	0	0	0	0	0	0
ENST00000553301.1|ENSG00000259031.1|OTTHUMG00000171590.1|OTTHUMT00000414338.1|CTD-2062F14.3-001|CTD-2062F14.3|553|	ENSMUST00000189236.1|ENSMUSG00000101767.1|OTTMUSG00000047122.1|OTTMUST00000121939.1|Gm28498-001|Gm28498|469|	553	469	0.36274	5.56e-13	0	0	1	0	0	0	1	0	0	1	0	0	0	1
ENST00000457858.1|ENSG00000229011.1|OTTHUMG00000017137.1|OTTHUMT00000045383.1|LINC01038-001|LINC01038|428|	ENSMUST00000193202.1|ENSMUSG00000022116.7|OTTMUSG00000047331.1|OTTMUST00000122337.1|4930449E01Rik-003|4930449E01Rik|360|	428	360	0.362553	5.68e-13	0	0	0	0	0	0	0	0	0	0	0	0	0	0
ENST00000435627.1|ENSG00000227946.1|OTTHUMG00000154653.1|OTTHUMT00000336482.1|AC007383.3-002|AC007383.3|482|	ENSMUST00000186786.1|ENSMUSG00000084799.7|OTTMUSG00000002611.3|OTTMUST00000122799.1|Ino80dos-004|Ino80dos|1236|	482	1236	0.359464	8.09e-13	1	0	1	1	0	0	3	2	0	1	1	0	1	5
ENST00000440016.6|ENSG00000237380.6|OTTHUMG00000154174.3|OTTHUMT00000334239.2|HOXD-AS2-001|HOXD-AS2|999|	ENSMUST00000190845.1|ENSMUSG00000100209.1|OTTMUSG00000045856.1|OTTMUST00000119840.1|Gm28793-001|Gm28793|413|	999	413	0.357532	1.01e-12	1	0	2	1	0	0	4	1	0	1	0	0	0	2
ENST00000503489.1|ENSG00000249984.1|OTTHUMG00000162675.1|OTTHUMT00000370026.1|CTC-529L17.2-001|CTC-529L17.2|730|	ENSMUST00000185308.1|ENSMUSG00000101416.1|OTTMUSG00000047360.2|OTTMUST00000122369.2|Gm29318-001|Gm29318|975|	730	975	0.354993	1.35e-12	0	0	0	0	0	0	0	0	0	0	0	0	0	0
ENST00000449485.1|ENSG00000225689.1|OTTHUMG00000022365.1|OTTHUMT00000058198.1|RP1-30E17.2-001|RP1-30E17.2|481|	ENSMUST00000186570.1|ENSMUSG00000101233.1|OTTMUSG00000047870.1|OTTMUST00000123138.1|Gm29242-001|Gm29242|457|	481	457	0.353571	1.58e-12	0	0	0	0	0	0	0	0	0	0	0	0	0	0
ENST00000560056.1|ENSG00000259245.1|OTTHUMG00000172356.1|OTTHUMT00000418042.1|RP11-684B21.1-001|RP11-684B21.1|632|	ENSMUST00000188427.1|ENSMUSG00000099802.1|OTTMUSG00000047320.1|OTTMUST00000122322.1|Gm28493-001|Gm28493|604|	632	604	0.353072	1.67e-12	0	0	0	0	0	0	0	0	0	0	0	0	0	0
ENST00000505903.1|ENSG00000250838.1|OTTHUMG00000161174.1|OTTHUMT00000364053.1|RP11-501C14.5-001|RP11-501C14.5|428|	ENSMUST00000191263.1|ENSMUSG00000099928.1|OTTMUSG00000045501.1|OTTMUST00000119322.1|Gm29202-001|Gm29202|422|	428	422	0.351139	2.08e-12	0	0	1	0	0	0	1	1	0	1	1	0	0	3
ENST00000425185.2|ENSG00000225446.2|OTTHUMG00000010019.2|OTTHUMT00000027727.2|RP4-665J23.2-001|RP4-665J23.2|1547|	ENSMUST00000187692.1|ENSMUSG00000101237.1|OTTMUSG00000047407.1|OTTMUST00000122439.1|Gm29464-001|Gm29464|513|	1547	513	0.347724	3.06e-12	0	0	1	0	0	0	1	0	0	1	0	0	0	1
ENST00000430027.3|ENSG00000231764.8|OTTHUMG00000154198.8|OTTHUMT00000334364.3|DLX6-AS1-001|DLX6-AS1|15364|	ENSMUST00000159568.5|ENSMUSG00000090063.6|OTTMUSG00000034242.6|OTTMUST00000086971.5|Dlx6os1-001|Dlx6os1|4608|	15364	4608	0.345138	4.1e-12	3	0	0	0	0	13	16	1	0	0	0	0	3	4
ENST00000508968.1|ENSG00000177822.7|OTTHUMG00000133641.2|OTTHUMT00000361747.1|AC108142.1-005|AC108142.1|587|	ENSMUST00000186135.1|ENSMUSG00000100706.6|OTTMUSG00000046254.3|OTTMUST00000126107.1|Gm19744-004|Gm19744|948|	587	948	0.34328	5.05e-12	1	0	1	1	0	0	3	0	0	1	1	0	0	2
ENST00000568500.1|ENSG00000261840.2|OTTHUMG00000176915.2|OTTHUMT00000434317.1|RP11-146F11.1-002|RP11-146F11.1|1142|	ENSMUST00000185351.1|ENSMUSG00000101225.1|OTTMUSG00000045025.1|OTTMUST00000118315.1|1700008J07Rik-001|1700008J07Rik|2432|	1142	2432	0.340042	7.25e-12	0	0	2	2	0	0	4	0	0	2	2	0	0	4
ENST00000414282.5|ENSG00000233016.6|OTTHUMG00000020949.1|OTTHUMT00000055146.1|SNHG7-001|SNHG7|2357|	ENSMUST00000181730.1|ENSMUSG00000097872.1|-|-|Gm26702-201|Gm26702|4570|	2357	4570	0.339216	7.95e-12	0	0	2	3	0	0	5	1	1	5	5	0	0	12
ENST00000624029.1|ENSG00000280347.1|OTTHUMG00000066284.1|OTTHUMT00000141831.1|AC000123.2-001|AC000123.2|4975|	ENSMUST00000201159.1|ENSMUSG00000106990.1|OTTMUSG00000056143.1|OTTMUST00000138816.1|Gm42547-001|Gm42547|3798|	4975	3798	0.338205	8.89e-12	2	0	1	0	0	9	12	3	0	1	0	1	7	12
ENST00000454034.1|ENSG00000233721.1|OTTHUMG00000020688.1|OTTHUMT00000054116.1|RP11-205K6.1-001|RP11-205K6.1|719|	ENSMUST00000130532.1|ENSMUSG00000085463.1|OTTMUSG00000011917.1|OTTMUST00000028118.1|9430024E24Rik-001|9430024E24Rik|713|	719	713	0.337588	9.53e-12	0	0	0	0	0	0	0	0	0	0	1	0	0	1
ENST00000530177.1|ENSG00000255546.1|OTTHUMG00000165810.1|OTTHUMT00000386315.1|RP11-168K9.1-001|RP11-168K9.1|572|	ENSMUST00000195393.1|ENSMUSG00000102873.1|OTTMUSG00000047755.1|OTTMUST00000122977.1|Gm38354-001|Gm38354|412|	572	412	0.337063	1.01e-11	0	0	1	0	0	0	1	0	0	0	0	0	0	0
ENST00000553990.1|ENSG00000258842.1|OTTHUMG00000171116.2|OTTHUMT00000411766.2|RP11-355I22.5-001|RP11-355I22.5|322|	ENSMUST00000189898.1|ENSMUSG00000100192.1|OTTMUSG00000047419.1|OTTMUST00000122462.1|Gm29587-001|Gm29587|332|	322	332	0.336144	1.12e-11	0	0	0	0	0	0	0	0	0	0	0	0	0	0
ENST00000429611.7|ENSG00000233429.9|OTTHUMG00000158089.4|OTTHUMT00000358453.1|HOTAIRM1-002|HOTAIRM1|722|	ENSMUST00000132559.1|ENSMUSG00000087658.2|OTTMUSG00000018870.3|OTTMUST00000065043.1|Hotairm1-001|Hotairm1|713|	722	713	0.334407	1.36e-11	0	0	1	1	0	0	2	0	0	1	1	0	0	2
ENST00000462528.1|ENSG00000241213.1|OTTHUMG00000159344.1|OTTHUMT00000354808.1|RP11-768G7.2-003|RP11-768G7.2|441|	ENSMUST00000194889.1|ENSMUSG00000102417.1|OTTMUSG00000047290.1|OTTMUST00000122272.1|Gm36939-001|Gm36939|439|	441	439	0.332804	1.62e-11	0	0	0	0	0	0	0	0	0	0	0	0	0	0
ENST00000445838.1|ENSG00000226455.1|OTTHUMG00000015214.1|OTTHUMT00000041517.1|RP3-512E2.2-001|RP3-512E2.2|876|	ENSMUST00000126225.1|ENSMUSG00000086150.1|OTTMUSG00000004928.1|OTTMUST00000010970.1|Bach2os-001|Bach2os|1661|	876	1661	0.332539	1.67e-11	0	0	0	0	0	0	0	0	0	0	1	0	0	1
ENST00000444985.6|ENSG00000234323.6|OTTHUMG00000020433.2|OTTHUMT00000053529.2|LINC01505-004|LINC01505|2054|	ENSMUST00000127709.1|ENSMUSG00000086371.1|OTTMUSG00000007041.1|OTTMUST00000016292.1|Gm12478-001|Gm12478|353|	2054	353	0.331882	1.79e-11	0	0	0	0	0	0	0	0	0	0	0	0	0	0
ENST00000549438.1|ENSG00000258317.1|OTTHUMG00000170142.1|OTTHUMT00000407630.1|RP11-603J24.5-002|RP11-603J24.5|882|	ENSMUST00000188089.1|ENSMUSG00000100548.1|OTTMUSG00000045815.1|OTTMUST00000119765.1|Gm29585-003|Gm29585|835|	882	835	0.330133	2.17e-11	0	0	0	1	0	0	1	0	0	1	1	0	0	2
ENST00000607598.2|ENSG00000272267.2|OTTHUMG00000185402.2|OTTHUMT00000470439.2|RP11-375N15.2-001|RP11-375N15.2|1377|	ENSMUST00000067161.5|ENSMUSG00000054247.6|OTTMUSG00000061014.1|-|Gm9939-201|Gm9939|1154|	1377	1154	0.328779	2.52e-11	1	0	0	1	0	1	3	0	0	2	1	0	0	3
ENST00000440404.5|ENSG00000224286.5|OTTHUMG00000035969.1|OTTHUMT00000087599.1|LINC01142-001|LINC01142|1457|	ENSMUST00000185992.1|ENSMUSG00000101869.1|OTTMUSG00000047689.1|OTTMUST00000122888.1|Gm29500-001|Gm29500|1344|	1457	1344	0.327109	3.03e-11	0	0	0	0	0	0	0	0	0	0	0	0	0	0
ENST00000546682.5|ENSG00000224078.12|OTTHUMG00000056661.10|OTTHUMT00000408281.1|SNHG14-022|SNHG14|8842|	ENSMUST00000208498.1|ENSMUSG00000109536.1|OTTMUSG00000058947.2|OTTMUST00000144638.2|9330162G02Rik-001|9330162G02Rik|30942|	8842	30942	0.324261	4.14e-11	2	1	0	0	0	5	8	5	0	4	3	1	6	19
ENST00000442188.1|ENSG00000225208.1|OTTHUMG00000018929.1|OTTHUMT00000049933.1|RP11-107I14.2-001|RP11-107I14.2|382|	ENSMUST00000191181.1|ENSMUSG00000102057.1|OTTMUSG00000047251.1|OTTMUST00000122168.1|Gm29594-001|Gm29594|398|	382	398	0.324195	4.17e-11	0	0	0	0	0	0	0	0	0	1	1	0	0	2
ENST00000440570.5|ENSG00000223749.8|OTTHUMG00000022455.1|OTTHUMT00000058370.1|MIR503HG-002|MIR503HG|760|	ENSMUST00000191072.1|ENSMUSG00000101603.1|OTTMUSG00000046499.2|OTTMUST00000121000.1|Gm28730-001|Gm28730|665|	760	665	0.321105	5.84e-11	0	0	0	0	0	0	0	0	0	1	0	1	0	2
ENST00000428623.5|ENSG00000238057.8|OTTHUMG00000153879.6|OTTHUMT00000332825.2|ZEB2-AS1-002|ZEB2-AS1|436|	ENSMUST00000127150.7|ENSMUSG00000052248.15|OTTMUSG00000012358.1|OTTMUST00000029433.1|Zeb2os-002|Zeb2os|1305|	436	1305	0.319267	7.13e-11	0	0	0	0	0	0	0	0	0	1	0	0	0	1
ENST00000607453.1|ENSG00000272195.1|OTTHUMG00000185820.1|OTTHUMT00000471377.1|RP11-156E8.1-001|RP11-156E8.1|1739|	ENSMUST00000192920.1|ENSMUSG00000070489.5|OTTMUSG00000050379.1|OTTMUST00000127858.1|4930527J03Rik-001|4930527J03Rik|595|	1739	595	0.315659	1.05e-10	1	0	3	2	0	0	6	0	1	1	1	0	0	3
ENST00000545549.1|ENSG00000256637.6|OTTHUMG00000167762.3|OTTHUMT00000396145.2|RP11-76I14.1-002|RP11-76I14.1|575|	ENSMUST00000187227.1|ENSMUSG00000100832.1|OTTMUSG00000045747.3|OTTMUST00000122515.1|Gm29260-002|Gm29260|552|	575	552	0.312237	1.52e-10	0	0	0	0	0	0	0	0	0	0	0	0	0	0
ENST00000541782.1|ENSG00000276232.1|OTTHUMG00000169160.1|OTTHUMT00000402606.1|SCARNA10-001|SCARNA10|248|	ENSMUST00000187351.1|ENSMUSG00000099587.1|OTTMUSG00000046179.2|OTTMUST00000120466.2|Gm28967-001|Gm28967|281|	248	281	0.310106	1.91e-10	0	0	0	0	0	0	0	0	0	0	0	0	0	0
ENST00000609682.1|ENSG00000256628.3|OTTHUMG00000159176.1|OTTHUMT00000353704.1|ZBTB11-AS1-001|ZBTB11-AS1|2743|	ENSMUST00000186480.1|ENSMUSG00000102101.1|OTTMUSG00000026410.3|OTTMUST00000065315.3|Zbtb11os1-001|Zbtb11os1|1350|	2743	1350	0.30977	1.98e-10	1	1	1	1	0	0	4	1	0	3	2	0	0	6
ENST00000485071.2|ENSG00000274272.1|OTTHUMG00000187473.1|OTTHUMT00000475053.1|RP11-44M6.7-001|RP11-44M6.7|4401|	ENSMUST00000197762.1|ENSMUSG00000106237.1|OTTMUSG00000054538.1|OTTMUST00000135200.1|Gm8066-001|Gm8066|485|	4401	485	0.308527	2.27e-10	2	0	5	7	3	0	17	0	0	1	1	0	0	2
ENST00000604581.1|ENSG00000271434.3|OTTHUMG00000019211.13|OTTHUMT00000469725.9|RP13-238F13.3-001|RP13-238F13.3|425|	ENSMUST00000138891.7|ENSMUSG00000087657.8|OTTMUSG00000036709.1|OTTMUST00000094048.1|Gm16764-001|Gm16764|541|	425	541	0.306966	2.68e-10	0	0	0	0	0	0	0	1	0	0	0	0	0	1
ENST00000452320.3|ENSG00000234456.7|OTTHUMG00000155465.4|OTTHUMT00000340240.3|MAGI2-AS3-007|MAGI2-AS3|8524|	ENSMUST00000197967.1|ENSMUSG00000106498.1|OTTMUSG00000053068.1|OTTMUST00000132732.1|Gm43032-001|Gm43032|3123|	8524	3123	0.305515	3.13e-10	2	0	0	0	0	7	9	2	0	0	0	1	4	7
ENST00000470817.1|ENSG00000239381.6|OTTHUMG00000158224.2|OTTHUMT00000350438.1|RP11-4B14.3-002|RP11-4B14.3|523|	ENSMUST00000188411.1|ENSMUSG00000099437.1|OTTMUSG00000047588.1|OTTMUST00000122725.1|Gm29135-001|Gm29135|612|	523	612	0.302407	4.35e-10	0	0	0	0	0	0	0	0	0	1	0	0	0	1
ENST00000429139.1|ENSG00000224020.1|OTTHUMG00000020657.1|OTTHUMT00000054033.1|MIR181A2HG-001|MIR181A2HG|662|	ENSMUST00000129089.1|ENSMUSG00000085201.1|OTTMUSG00000012469.2|OTTMUST00000029641.2|Nr6a1os-002|Nr6a1os|645|	662	645	0.299086	6.17e-10	0	0	0	0	0	1	1	0	0	0	0	0	0	0
ENST00000624566.1|ENSG00000278915.1|OTTHUMG00000189138.1|OTTHUMT00000478933.1|AC005609.18-001|AC005609.18|577|	ENSMUST00000097612.3|ENSMUSG00000073594.3|OTTMUSG00000050624.1|OTTMUST00000128346.1|Gm10545-001|Gm10545|4969|	577	4969	0.29865	6.46e-10	0	0	1	0	0	0	1	0	0	1	0	0	2	3
ENST00000418474.1|ENSG00000224152.1|OTTHUMG00000154041.1|OTTHUMT00000333626.1|AC009506.1-001|AC009506.1|1494|	ENSMUST00000131198.1|ENSMUSG00000086603.1|OTTMUSG00000013019.1|OTTMUST00000031398.1|Gm13620-001|Gm13620|511|	1494	511	0.296276	8.29e-10	0	0	2	1	0	1	4	0	0	1	1	0	0	2
ENST00000605277.1|ENSG00000261386.2|OTTHUMG00000172866.2|OTTHUMT00000468181.1|CTD-2012K14.6-002|CTD-2012K14.6|798|	ENSMUST00000182046.1|ENSMUSG00000098120.1|OTTMUSG00000043506.1|OTTMUST00000114099.1|Gm5914-002|Gm5914|332|	798	332	0.295701	8.81e-10	0	0	0	1	0	0	1	0	0	0	0	0	0	0
ENST00000423739.1|ENSG00000227336.1|OTTHUMG00000017005.1|OTTHUMT00000045171.1|LINC00434-001|LINC00434|419|	ENSMUST00000194560.1|ENSMUSG00000102284.1|OTTMUSG00000047335.1|OTTMUST00000122342.1|Gm37002-001|Gm37002|373|	419	373	0.294393	1.01e-09	0	0	0	0	0	0	0	0	0	0	0	0	0	0
ENST00000624286.1|ENSG00000279196.1|OTTHUMG00000176774.1|OTTHUMT00000433685.1|RP11-1072A3.3-001|RP11-1072A3.3|3641|	ENSMUST00000206516.1|ENSMUSG00000108402.1|OTTMUSG00000058630.1|OTTMUST00000143974.1|9430064I24Rik-001|9430064I24Rik|2669|	3641	2669	0.294214	1.03e-09	1	0	2	2	0	0	5	0	0	1	0	1	0	2
ENST00000604062.5|ENSG00000232593.6|OTTHUMG00000021603.2|OTTHUMT00000468380.1|KANTR-004|KANTR|581|	ENSMUST00000135115.7|ENSMUSG00000087403.8|OTTMUSG00000019703.2|OTTMUST00000047174.1|Kantr-001|Kantr|388|	581	388	0.293216	1.14e-09	0	0	0	0	0	0	0	0	0	0	0	0	0	0
ENST00000514840.1|ENSG00000249664.1|OTTHUMG00000162781.1|OTTHUMT00000370383.1|CTD-2227C6.2-001|CTD-2227C6.2|825|	ENSMUST00000044500.5|ENSMUSG00000089940.1|OTTMUSG00000033529.2|OTTMUST00000084374.2|Gm4117-001|Gm4117|52401|	825	52401	0.292653	1.21e-09	0	0	0	0	0	0	0	13	2	8	1	3	30	57
ENST00000450977.2|ENSG00000235139.2|OTTHUMG00000154603.3|OTTHUMT00000336286.3|AC003984.1-001|AC003984.1|4104|	ENSMUST00000196238.1|ENSMUSG00000105334.1|OTTMUSG00000054697.1|OTTMUST00000135582.1|Gm42680-001|Gm42680|2500|	4104	2500	0.290167	1.57e-09	3	0	0	0	0	3	6	1	0	0	0	0	0	1
ENST00000628780.1|ENSG00000279141.3|OTTHUMG00000189535.1|OTTHUMT00000479925.1|LINC01451-001|LINC01451|3402|	ENSMUST00000181730.1|ENSMUSG00000097872.1|-|-|Gm26702-201|Gm26702|4570|	3402	4570	0.2891	1.75e-09	0	0	4	4	1	0	9	1	1	5	5	0	0	12
ENST00000585193.1|ENSG00000266473.1|OTTHUMG00000179556.1|OTTHUMT00000447080.1|RP11-401F2.3-001|RP11-401F2.3|689|	ENSMUST00000147445.1|ENSMUSG00000059706.4|OTTMUSG00000003093.1|OTTMUST00000006372.1|A830035A12Rik-001|A830035A12Rik|861|	689	861	0.288577	1.85e-09	2	0	2	1	0	0	5	0	0	1	1	0	0	2
ENST00000602852.1|ENSG00000225206.7|OTTHUMG00000010680.3|OTTHUMT00000467512.1|MIR137HG-002|MIR137HG|999|	ENSMUST00000180774.1|ENSMUSG00000097311.7|OTTMUSG00000042750.2|OTTMUST00000112489.1|Gm26871-005|Gm26871|695|	999	695	0.288199	1.92e-09	0	0	1	0	0	0	1	0	0	0	1	0	0	1
ENST00000620937.1|ENSG00000275888.1|OTTHUMG00000188129.1|OTTHUMT00000476246.1|RP13-516M14.10-001|RP13-516M14.10|629|	ENSMUST00000189381.1|ENSMUSG00000100629.1|OTTMUSG00000049398.1|OTTMUST00000121654.1|Gm28192-001|Gm28192|778|	629	778	0.286301	2.34e-09	0	0	0	1	0	0	1	0	0	1	0	0	0	1
ENST00000548742.1|ENSG00000257653.1|OTTHUMG00000170395.1|OTTHUMT00000408859.1|RP11-579D7.2-001|RP11-579D7.2|713|	ENSMUST00000187215.1|ENSMUSG00000100220.1|OTTMUSG00000047283.1|OTTMUST00000122239.1|Gm29331-001|Gm29331|605|	713	605	0.285948	2.43e-09	0	0	2	1	0	0	3	0	0	1	1	0	0	2
ENST00000503403.1|ENSG00000249743.5|OTTHUMG00000162463.3|OTTHUMT00000369162.1|RP11-60A8.1-004|RP11-60A8.1|445|	ENSMUST00000193184.1|ENSMUSG00000104430.1|OTTMUSG00000047356.1|OTTMUST00000122365.1|Gm37425-001|Gm37425|432|	445	432	0.284891	2.71e-09	0	0	0	0	0	0	0	0	0	0	0	0	0	0
ENST00000443546.1|ENSG00000229950.1|OTTHUMG00000014233.1|OTTHUMT00000039811.1|TFAP2A-AS1-001|TFAP2A-AS1|910|	ENSMUST00000181176.2|ENSMUSG00000097752.2|OTTMUSG00000046945.1|OTTMUST00000121673.1|Gm26688-001|Gm26688|1568|	910	1568	0.284437	2.83e-09	1	0	1	1	1	0	4	0	0	3	1	0	0	4
ENST00000609803.2|ENSG00000273015.2|OTTHUMG00000185943.2|OTTHUMT00000471803.2|RP11-352M15.2-001|RP11-352M15.2|9730|	ENSMUST00000185067.1|ENSMUSG00000097536.2|OTTMUSG00000044625.3|OTTMUST00000117411.3|2610037D02Rik-001|2610037D02Rik|2997|	9730	2997	0.28433	2.87e-09	5	0	1	0	1	1	8	0	0	0	0	0	1	1
ENST00000568248.1|ENSG00000259820.1|OTTHUMG00000164324.1|OTTHUMT00000378288.1|AC083843.1-001|AC083843.1|6253|	ENSMUST00000192781.1|ENSMUSG00000104324.1|OTTMUSG00000042918.1|OTTMUST00000112736.1|Gm37320-001|Gm37320|4953|	6253	4953	0.283287	3.19e-09	2	0	0	0	0	3	5	1	0	0	1	0	1	3
ENST00000568248.1|ENSG00000259820.1|OTTHUMG00000164324.1|OTTHUMT00000378288.1|AC083843.1-001|AC083843.1|6253|	ENSMUST00000192728.1|ENSMUSG00000104116.1|OTTMUSG00000042920.1|OTTMUST00000112739.1|Gm37296-001|Gm37296|2922|	6253	2922	0.281947	3.66e-09	2	0	0	0	0	3	5	1	0	0	0	0	1	2
ENST00000456384.1|ENSG00000237843.1|OTTHUMG00000154542.1|OTTHUMT00000335868.1|AC016903.2-001|AC016903.2|326|	ENSMUST00000194422.1|ENSMUSG00000102168.1|OTTMUSG00000047595.1|OTTMUST00000122733.1|Gm36943-001|Gm36943|282|	326	282	0.281391	3.87e-09	0	0	0	0	0	0	0	0	0	0	0	0	0	0
ENST00000561881.1|ENSG00000259946.1|OTTHUMG00000175887.1|OTTHUMT00000431238.1|RP11-490G2.2-001|RP11-490G2.2|1810|	ENSMUST00000194141.1|ENSMUSG00000104033.1|OTTMUSG00000042757.1|OTTMUST00000112500.1|Gm37773-001|Gm37773|2120|	1810	2120	0.281129	3.98e-09	1	0	0	0	0	1	2	3	0	0	0	0	3	6
ENST00000450500.1|ENSG00000225790.1|OTTHUMG00000157253.1|OTTHUMT00000348197.1|RP11-2L8.1-001|RP11-2L8.1|560|	ENSMUST00000190301.1|ENSMUSG00000101897.1|OTTMUSG00000047585.2|OTTMUST00000122722.2|Gm29137-001|Gm29137|520|	560	520	0.28026	4.35e-09	0	0	0	0	0	0	0	0	0	0	0	0	0	0
ENST00000453716.1|ENSG00000232539.1|OTTHUMG00000065060.1|OTTHUMT00000139726.1|LINC00945-001|LINC00945|753|	ENSMUST00000195507.1|ENSMUSG00000102958.1|OTTMUSG00000047281.1|OTTMUST00000122232.1|Gm37016-001|Gm37016|660|	753	660	0.278399	5.26e-09	0	0	0	0	0	1	1	0	0	1	1	0	0	2
ENST00000525909.1|ENSG00000224023.10|OTTHUMG00000019231.4|OTTHUMT00000388537.1|FLJ37035-006|FLJ37035|487|	ENSMUST00000185366.1|ENSMUSG00000101546.1|OTTMUSG00000047455.1|OTTMUST00000122509.1|Gm28747-001|Gm28747|571|	487	571	0.278307	5.31e-09	0	0	0	0	0	0	0	0	0	0	0	0	0	0
ENST00000612252.1|ENSG00000277801.1|OTTHUMG00000188137.1|OTTHUMT00000476267.1|RP11-681H18.2-001|RP11-681H18.2|832|	ENSMUST00000185441.1|ENSMUSG00000099597.1|OTTMUSG00000047101.1|OTTMUST00000121910.1|Gm28933-001|Gm28933|1407|	832	1407	0.276652	6.28e-09	0	0	0	0	0	0	0	0	0	0	0	0	1	1
ENST00000582106.1|ENSG00000265688.1|OTTHUMG00000178435.1|OTTHUMT00000441951.1|MAFG-AS1-001|MAFG-AS1|1895|	ENSMUST00000151998.1|ENSMUSG00000053613.6|OTTMUSG00000004079.1|OTTMUST00000009152.1|Notumos-001|Notumos|2659|	1895	2659	0.276065	6.66e-09	0	0	1	2	0	0	3	2	0	3	1	0	0	6
ENST00000450977.2|ENSG00000235139.2|OTTHUMG00000154603.3|OTTHUMT00000336286.3|AC003984.1-001|AC003984.1|4104|	ENSMUST00000197397.1|ENSMUSG00000106310.1|OTTMUSG00000054754.1|OTTMUST00000135720.1|Gm43523-001|Gm43523|2878|	4104	2878	0.272916	9.16e-09	3	0	0	0	0	3	6	0	0	0	0	0	2	2
ENST00000624188.1|ENSG00000279050.1|OTTHUMG00000176879.1|OTTHUMT00000434200.1|PWAR1-001|PWAR1|2414|	ENSMUST00000208498.1|ENSMUSG00000109536.1|OTTMUSG00000058947.2|OTTMUST00000144638.2|9330162G02Rik-001|9330162G02Rik|30942|	2414	30942	0.271001	1.11e-08	0	0	0	0	0	0	0	5	0	4	3	1	6	19
ENST00000436530.1|ENSG00000225680.1|OTTHUMG00000133689.1|OTTHUMT00000257940.1|AL163953.2-001|AL163953.2|726|	ENSMUST00000194871.1|ENSMUSG00000102763.1|OTTMUSG00000047339.1|OTTMUST00000122347.1|Gm37257-001|Gm37257|717|	726	717	0.27084	1.13e-08	0	0	0	0	0	0	0	0	0	1	0	0	0	1
ENST00000596585.3|ENSG00000268996.3|OTTHUMG00000187259.3|OTTHUMT00000474654.3|MAN1B1-AS1-001|MAN1B1-AS1|1872|	ENSMUST00000181730.1|ENSMUSG00000097872.1|-|-|Gm26702-201|Gm26702|4570|	1872	4570	0.26655	1.73e-08	1	0	2	3	0	0	6	1	1	5	5	0	0	12
ENST00000431095.5|ENSG00000130600.16|OTTHUMG00000012477.5|OTTHUMT00000142900.3|H19-007|H19|1481|	ENSMUST00000136359.7|ENSMUSG00000000031.15|OTTMUSG00000014998.2|OTTMUST00000035613.1|H19-001|H19|2286|	1481	2286	0.265374	1.95e-08	0	1	1	1	1	0	4	0	0	2	1	0	1	4
ENST00000561611.2|ENSG00000261008.6|OTTHUMG00000173457.3|OTTHUMT00000423195.2|LINC01572-002|LINC01572|2194|	ENSMUST00000180524.7|ENSMUSG00000097393.7|-|-|D030068K23Rik-202|D030068K23Rik|3677|	2194	3677	0.26461	2.1e-08	3	1	0	0	1	3	8	0	0	1	0	0	2	3
ENST00000624176.1|ENSG00000279726.1|OTTHUMG00000189135.1|OTTHUMT00000478930.1|AC005609.16-002|AC005609.16|513|	ENSMUST00000097612.3|ENSMUSG00000073594.3|OTTMUSG00000050624.1|OTTMUST00000128346.1|Gm10545-001|Gm10545|4969|	513	4969	0.264414	2.14e-08	0	0	2	1	0	0	3	0	0	1	0	0	2	3
ENST00000513812.1|ENSG00000249169.1|OTTHUMG00000162625.2|OTTHUMT00000369790.1|CTC-529L17.1-001|CTC-529L17.1|572|	ENSMUST00000195732.1|ENSMUSG00000102355.1|OTTMUSG00000047361.1|OTTMUST00000122370.1|Gm38349-001|Gm38349|462|	572	462	0.264358	2.15e-08	0	0	0	0	0	0	0	0	0	0	0	0	0	0
ENST00000554678.1|ENSG00000258908.1|OTTHUMG00000170985.1|OTTHUMT00000411086.1|RP11-203M5.8-001|RP11-203M5.8|492|	ENSMUST00000194838.1|ENSMUSG00000103730.1|OTTMUSG00000047337.1|OTTMUST00000122344.1|Gm38316-001|Gm38316|469|	492	469	0.264287	2.17e-08	0	0	0	0	0	0	0	0	0	0	0	0	0	0
ENST00000564401.1|ENSG00000259941.1|OTTHUMG00000176401.1|OTTHUMT00000431908.1|RP11-48G14.2-001|RP11-48G14.2|2465|	ENSMUST00000193207.1|ENSMUSG00000102225.1|OTTMUSG00000044779.2|OTTMUST00000117713.2|Gm37983-001|Gm37983|2006|	2465	2006	0.262521	2.58e-08	0	0	0	0	0	1	1	2	0	1	0	0	2	5
ENST00000445161.5|ENSG00000232139.5|OTTHUMG00000019132.1|OTTHUMT00000050603.1|LINC00867-001|LINC00867|580|	ENSMUST00000186261.1|ENSMUSG00000099678.1|OTTMUSG00000045352.1|OTTMUST00000119073.1|Gm28351-001|Gm28351|559|	580	559	0.261418	2.88e-08	0	0	0	0	0	0	0	0	0	1	0	0	0	1
ENST00000512115.2|ENSG00000248859.2|OTTHUMG00000163231.2|OTTHUMT00000372216.2|LINC01574-001|LINC01574|560|	ENSMUST00000189848.1|ENSMUSG00000100728.1|OTTMUSG00000045778.1|OTTMUST00000119705.1|Gm29431-001|Gm29431|449|	560	449	0.260031	3.3e-08	0	0	2	2	0	0	4	0	0	1	0	0	0	1
ENST00000414743.6|ENSG00000229249.6|OTTHUMG00000017115.2|OTTHUMT00000045356.2|LINC00446-002|LINC00446|459|	ENSMUST00000194770.1|ENSMUSG00000104311.1|OTTMUSG00000047332.1|OTTMUST00000122339.1|Gm37910-001|Gm37910|217|	459	217	0.25972	3.41e-08	0	0	0	0	0	0	0	0	0	0	0	0	0	0
ENST00000603837.1|ENSG00000271167.1|OTTHUMG00000184925.1|OTTHUMT00000469342.1|LINC01109-001|LINC01109|3081|	ENSMUST00000184429.1|ENSMUSG00000098659.7|OTTMUSG00000044897.2|OTTMUST00000117997.1|1110015O18Rik-003|1110015O18Rik|469|	3081	469	0.258666	3.78e-08	0	0	0	0	0	1	1	0	0	0	0	0	0	0
ENST00000508832.2|ENSG00000251562.7|OTTHUMG00000166322.4|OTTHUMT00000389144.2|MALAT1-002|MALAT1|1519|	ENSMUST00000172812.2|ENSMUSG00000092341.2|OTTMUSG00000037798.2|OTTMUST00000097547.2|Malat1-001|Malat1|6983|	1519	6983	0.258537	3.82e-08	0	0	0	0	0	0	0	1	2	0	0	0	2	5
ENST00000420389.1|ENSG00000228478.1|OTTHUMG00000014230.1|OTTHUMT00000039808.1|RP1-290I10.3-001|RP1-290I10.3|539|	ENSMUST00000194995.1|ENSMUSG00000104458.1|OTTMUSG00000047404.1|OTTMUST00000122436.1|Gm37823-001|Gm37823|388|	539	388	0.258308	3.91e-08	0	0	0	0	0	0	0	0	0	0	0	0	0	0
ENST00000416928.6|ENSG00000224189.6|OTTHUMG00000154172.2|OTTHUMT00000334217.2|HAGLR-001|HAGLR|4235|	ENSMUST00000100000.2|ENSMUSG00000075277.4|OTTMUSG00000016593.1|-|Haglr-201|Haglr|2085|	4235	2085	0.258205	3.95e-08	2	0	5	2	1	1	11	0	0	3	0	0	0	3
ENST00000435649.2|ENSG00000233593.8|OTTHUMG00000010018.3|OTTHUMT00000470185.1|RP4-665J23.1-004|RP4-665J23.1|828|	ENSMUST00000124394.2|ENSMUSG00000099061.1|OTTMUSG00000044447.1|OTTMUST00000117053.1|Gm28050-002|Gm28050|449|	828	449	0.257034	4.43e-08	0	0	0	0	0	0	0	0	0	1	0	0	0	1
ENST00000631594.2|ENSG00000282164.2|OTTHUMG00000191428.2|OTTHUMT00000487859.2|PEG13-001|PEG13|5667|	ENSMUST00000202826.1|ENSMUSG00000106847.1|OTTMUSG00000055869.1|OTTMUST00000138225.1|Peg13-001|Peg13|4725|	5667	4725	0.256924	4.48e-08	0	2	4	1	0	2	9	3	0	3	2	2	1	11
ENST00000604070.1|ENSG00000271533.1|OTTHUMG00000184205.1|OTTHUMT00000468302.1|RP3-368A4.6-001|RP3-368A4.6|3685|	ENSMUST00000193066.1|ENSMUSG00000103697.1|OTTMUSG00000043539.1|OTTMUST00000114224.1|Gm38020-001|Gm38020|4676|	3685	4676	0.256332	4.74e-08	3	1	0	0	1	3	8	1	0	0	0	0	3	4
ENST00000381361.4|ENSG00000099869.7|OTTHUMG00000009557.5|OTTHUMT00000026390.5|IGF2-AS-001|IGF2-AS|2063|	ENSMUST00000141681.1|ENSMUSG00000086266.1|OTTMUSG00000015000.2|OTTMUST00000035623.1|Igf2os-001|Igf2os|4778|	2063	4778	0.254831	5.49e-08	0	0	3	3	1	0	7	0	0	2	3	1	0	6
ENST00000500179.1|ENSG00000245384.1|OTTHUMG00000160977.1|OTTHUMT00000363222.1|AC004053.1-001|AC004053.1|2968|	ENSMUST00000180471.2|ENSMUSG00000097911.2|OTTMUSG00000054835.3|OTTMUST00000135886.1|Gm26691-002|Gm26691|4401|	2968	4401	0.254044	5.93e-08	0	0	0	0	0	0	0	0	0	1	0	0	2	3
ENST00000552541.1|ENSG00000258294.5|OTTHUMG00000169671.1|OTTHUMT00000405359.1|RP11-314D7.1-004|RP11-314D7.1|761|	ENSMUST00000193608.1|ENSMUSG00000104006.1|OTTMUSG00000047449.1|OTTMUST00000122502.1|Gm38333-001|Gm38333|604|	761	604	0.253851	6.04e-08	0	0	0	0	0	0	0	0	0	0	0	0	1	1
ENST00000414656.1|ENSG00000228544.1|OTTHUMG00000020946.1|OTTHUMT00000055132.1|CCDC183-AS1-001|CCDC183-AS1|2386|	ENSMUST00000181730.1|ENSMUSG00000097872.1|-|-|Gm26702-201|Gm26702|4570|	2386	4570	0.252115	7.15e-08	0	0	0	3	1	0	4	1	1	5	5	0	0	12
ENST00000532706.1|ENSG00000204241.7|OTTHUMG00000167125.1|OTTHUMT00000393291.1|RP11-713P17.3-005|RP11-713P17.3|543|	ENSMUST00000190432.1|ENSMUSG00000100409.1|OTTMUSG00000047478.1|OTTMUST00000122540.1|Gm29172-001|Gm29172|417|	543	417	0.249845	8.9e-08	0	0	0	1	0	0	1	0	0	0	0	0	0	0
ENST00000512652.1|ENSG00000249425.1|OTTHUMG00000161427.1|OTTHUMT00000364886.1|RP11-502M1.2-001|RP11-502M1.2|1417|	ENSMUST00000194524.1|ENSMUSG00000103849.1|OTTMUSG00000052114.1|OTTMUST00000130991.1|Gm37806-001|Gm37806|6387|	1417	6387	0.248877	9.77e-08	0	0	0	0	0	0	0	2	0	1	0	1	1	5
ENST00000440536.3|ENSG00000271434.3|OTTHUMG00000019211.13|OTTHUMT00000467835.2|RP13-238F13.3-002|RP13-238F13.3|1359|	ENSMUST00000207036.1|ENSMUSG00000109270.1|OTTMUSG00000060043.1|OTTMUST00000147008.1|Gm10584-001|Gm10584|2628|	1359	2628	0.248709	9.93e-08	0	0	2	1	0	0	3	1	0	4	4	0	0	9
ENST00000627566.1|ENSG00000280650.1|OTTHUMG00000189553.1|OTTHUMT00000479956.1|KCNIP4-IT1-001|KCNIP4-IT1|9848|	ENSMUST00000198771.1|ENSMUSG00000106244.1|OTTMUSG00000054421.1|OTTMUST00000134995.1|Gm43046-001|Gm43046|2451|	9848	2451	0.248289	1.03e-07	2	0	0	0	1	7	10	0	0	0	0	0	0	0
ENST00000550837.1|ENSG00000258297.1|OTTHUMG00000170428.1|OTTHUMT00000409099.1|RP11-658F2.8-002|RP11-658F2.8|2339|	ENSMUST00000195512.1|ENSMUSG00000103651.1|OTTMUSG00000043550.1|OTTMUST00000114274.1|Gm37206-001|Gm37206|3069|	2339	3069	0.24741	1.12e-07	0	0	0	0	0	0	0	0	0	0	0	1	0	1
ENST00000415285.1|ENSG00000276012.1|OTTHUMG00000188138.1|OTTHUMT00000476268.1|RP11-397O8.7-001|RP11-397O8.7|429|	ENSMUST00000186300.1|ENSMUSG00000101445.1|OTTMUSG00000047102.1|OTTMUST00000121911.1|Gm28932-001|Gm28932|357|	429	357	0.247284	1.14e-07	0	0	0	0	0	0	0	0	0	0	0	0	0	0
ENST00000536455.1|ENSG00000255629.1|OTTHUMG00000168756.1|OTTHUMT00000400907.1|RP11-196H14.3-001|RP11-196H14.3|462|	ENSMUST00000188932.1|ENSMUSG00000100143.1|OTTMUSG00000046826.1|OTTMUST00000121464.1|C030027H14Rik-001|C030027H14Rik|457|	462	457	0.246994	1.17e-07	0	0	0	0	0	0	0	0	0	0	0	0	0	0
ENST00000625013.1|ENSG00000279312.1|OTTHUMG00000184052.1|OTTHUMT00000467930.1|RP3-331H24.7-001|RP3-331H24.7|2135|	ENSMUST00000190910.1|ENSMUSG00000100775.1|OTTMUSG00000046265.1|OTTMUST00000120612.1|Gm29107-001|Gm29107|347|	2135	347	0.244525	1.48e-07	3	0	0	0	0	3	6	0	0	0	0	0	0	0
ENST00000617652.1|ENSG00000275966.1|OTTHUMG00000186721.1|OTTHUMT00000473669.1|RP11-1055B8.9-001|RP11-1055B8.9|491|	ENSMUST00000145437.1|ENSMUSG00000075389.3|OTTMUSG00000004109.1|OTTMUST00000009281.1|2810410L24Rik-002|2810410L24Rik|646|	491	646	0.244148	1.54e-07	1	0	0	0	0	0	1	0	0	1	2	0	0	3
ENST00000625908.1|ENSG00000280561.1|OTTHUMG00000019234.4|OTTHUMT00000480475.1|RP11-383C5.8-001|RP11-383C5.8|565|	ENSMUST00000185366.1|ENSMUSG00000101546.1|OTTMUSG00000047455.1|OTTMUST00000122509.1|Gm28747-001|Gm28747|571|	565	571	0.243863	1.58e-07	0	0	0	0	0	0	0	0	0	0	0	0	0	0
ENST00000625195.1|ENSG00000278901.1|OTTHUMG00000189139.1|OTTHUMT00000478934.1|AC005609.17-001|AC005609.17|617|	ENSMUST00000097612.3|ENSMUSG00000073594.3|OTTMUSG00000050624.1|OTTMUST00000128346.1|Gm10545-001|Gm10545|4969|	617	4969	0.243529	1.63e-07	1	0	1	1	0	0	3	0	0	1	0	0	2	3
ENST00000554623.1|ENSG00000259006.1|OTTHUMG00000171164.1|OTTHUMT00000412015.1|RP11-566K11.4-001|RP11-566K11.4|985|	ENSMUST00000195600.1|ENSMUSG00000103244.1|OTTMUSG00000051563.1|OTTMUST00000130188.1|Gm38092-001|Gm38092|653|	985	653	0.242277	1.84e-07	0	0	0	0	0	0	0	0	0	0	0	0	0	0
ENST00000414776.1|ENSG00000225084.1|OTTHUMG00000132218.1|OTTHUMT00000255276.1|AL450226.2-001|AL450226.2|710|	ENSMUST00000189608.1|ENSMUSG00000101295.1|OTTMUSG00000045511.1|OTTMUST00000119343.1|Gm28180-001|Gm28180|722|	710	722	0.241438	1.99e-07	0	0	0	0	0	0	0	0	0	0	0	0	0	0
ENST00000518848.5|ENSG00000254369.6|OTTHUMG00000158092.4|OTTHUMT00000350160.1|HOXA-AS3-003|HOXA-AS3|562|	ENSMUST00000131502.1|ENSMUSG00000085696.8|OTTMUSG00000018869.2|OTTMUST00000045390.1|Hoxaas3-003|Hoxaas3|853|	562	853	0.241262	2.02e-07	0	0	1	1	0	0	2	0	0	0	0	0	0	0
ENST00000439433.1|ENSG00000230749.4|OTTHUMG00000152831.1|OTTHUMT00000328190.1|MEIS1-AS2-001|MEIS1-AS2|690|	ENSMUST00000152073.1|ENSMUSG00000087507.1|OTTMUSG00000030892.1|OTTMUST00000076462.1|Gm16141-001|Gm16141|790|	690	790	0.240499	2.17e-07	1	0	1	1	0	0	3	0	0	0	0	0	0	0
ENST00000440762.5|ENSG00000233973.6|OTTHUMG00000009566.2|OTTHUMT00000026413.1|LINC01360-001|LINC01360|3871|	ENSMUST00000194500.1|ENSMUSG00000104329.1|OTTMUSG00000052279.1|OTTMUST00000131299.1|Gm37324-001|Gm37324|4504|	3871	4504	0.239877	2.3e-07	1	0	0	0	0	2	3	0	0	0	0	0	1	1
ENST00000509947.1|ENSG00000249364.5|OTTHUMG00000162352.1|OTTHUMT00000368617.1|RP11-434D9.1-003|RP11-434D9.1|780|	ENSMUST00000195109.1|ENSMUSG00000102542.1|OTTMUSG00000047344.1|OTTMUST00000122352.1|Gm38133-001|Gm38133|815|	780	815	0.23768	2.83e-07	0	0	0	0	0	0	0	0	0	0	0	0	0	0
ENST00000412119.1|ENSG00000226903.1|OTTHUMG00000017361.1|OTTHUMT00000045815.1|LINC00354-001|LINC00354|347|	ENSMUST00000189500.1|ENSMUSG00000101899.1|OTTMUSG00000047470.1|OTTMUST00000122532.1|Gm29175-001|Gm29175|402|	347	402	0.237514	2.88e-07	0	0	0	0	0	0	0	0	0	0	0	0	0	0
ENST00000573308.5|ENSG00000263327.6|OTTHUMG00000160321.2|OTTHUMT00000439457.1|TAPT1-AS1-003|TAPT1-AS1|1031|	ENSMUST00000195990.1|ENSMUSG00000104784.1|OTTMUSG00000053814.2|OTTMUST00000133949.1|Gm42984-001|Gm42984|987|	1031	987	0.236687	3.11e-07	1	1	1	0	0	0	3	0	0	1	1	0	0	2
ENST00000536518.1|ENSG00000256115.5|OTTHUMG00000168644.1|OTTHUMT00000400477.1|RP11-319E16.1-001|RP11-319E16.1|585|	ENSMUST00000186340.1|ENSMUSG00000101659.1|OTTMUSG00000047427.1|OTTMUST00000122470.1|Gm29009-001|Gm29009|496|	585	496	0.236689	3.11e-07	1	0	0	0	0	0	1	0	0	0	0	0	0	0
ENST00000442176.1|ENSG00000229108.1|OTTHUMG00000152388.1|OTTHUMT00000326053.1|MEOX2-AS1-001|MEOX2-AS1|697|	ENSMUST00000190633.1|ENSMUSG00000101067.1|OTTMUSG00000047425.1|OTTMUST00000122468.1|Gm29007-001|Gm29007|679|	697	679	0.236541	3.15e-07	0	0	0	0	0	0	0	0	0	0	0	0	0	0
ENST00000511256.1|ENSG00000249082.2|OTTHUMG00000163077.2|OTTHUMT00000371601.1|C5orf66-AS1-002|C5orf66-AS1|477|	ENSMUST00000190376.1|ENSMUSG00000100096.1|OTTMUSG00000045334.1|OTTMUST00000119047.1|Gm28760-001|Gm28760|481|	477	481	0.236117	3.28e-07	1	0	1	1	0	0	3	0	0	0	1	0	0	1
ENST00000624727.1|ENSG00000279733.1|OTTHUMG00000167289.1|OTTHUMT00000394018.1|RP11-685B24.1-001|RP11-685B24.1|2117|	ENSMUST00000208302.1|ENSMUSG00000109244.1|OTTMUSG00000059471.1|OTTMUST00000145924.1|Gm44751-001|Gm44751|4387|	2117	4387	0.236052	3.3e-07	1	0	0	0	0	4	5	2	0	0	0	0	3	5
ENST00000443306.1|ENSG00000233891.7|OTTHUMG00000152614.6|OTTHUMT00000327014.2|AC007131.2-001|AC007131.2|422|	ENSMUST00000125234.7|ENSMUSG00000033015.16|OTTMUSG00000005298.4|OTTMUST00000011813.3|4933427E13Rik-001|4933427E13Rik|1493|	422	1493	0.235793	3.38e-07	0	0	0	0	0	0	0	0	0	0	0	0	0	0
ENST00000624188.1|ENSG00000279050.1|OTTHUMG00000176879.1|OTTHUMT00000434200.1|PWAR1-001|PWAR1|2414|	ENSMUST00000208469.1|ENSMUSG00000109575.1|OTTMUSG00000058963.1|OTTMUST00000144656.1|Gm44831-001|Gm44831|2989|	2414	2989	0.234594	3.78e-07	0	0	0	0	0	0	0	0	0	0	0	0	1	1
ENST00000592217.2|ENSG00000259605.3|OTTHUMG00000172207.3|OTTHUMT00000460566.2|AC074212.5-002|AC074212.5|1420|	ENSMUST00000098778.2|ENSMUSG00000074355.2|OTTMUSG00000058458.1|OTTMUST00000143577.1|Gm10676-001|Gm10676|3221|	1420	3221	0.233552	4.16e-07	2	0	3	3	1	1	10	2	0	2	4	0	0	8
ENST00000551280.1|ENSG00000257912.1|OTTHUMG00000169866.1|OTTHUMT00000406325.1|RP11-248E9.5-001|RP11-248E9.5|777|	ENSMUST00000193709.1|ENSMUSG00000103550.1|OTTMUSG00000047460.1|OTTMUST00000122519.1|Gm38219-001|Gm38219|721|	777	721	0.232756	4.48e-07	1	0	0	0	0	0	1	0	0	0	0	0	0	0
ENST00000460955.5|ENSG00000244198.5|OTTHUMG00000158007.1|OTTHUMT00000349987.1|RP4-545C24.1-001|RP4-545C24.1|569|	ENSMUST00000203086.1|ENSMUSG00000108190.1|OTTMUSG00000057500.1|OTTMUST00000141396.1|Gm44731-001|Gm44731|542|	569	542	0.232015	4.8e-07	0	0	2	2	0	0	4	0	0	1	2	0	0	3
ENST00000597346.1|ENSG00000269821.1|OTTHUMG00000171022.2|OTTHUMT00000411275.2|KCNQ1OT1-001|KCNQ1OT1|91667|	ENSMUST00000193147.1|ENSMUSG00000104485.1|OTTMUSG00000046391.1|OTTMUST00000120860.1|Gm38065-001|Gm38065|3492|	91667	3492	0.231515	5.03e-07	4	3	17	14	1	4	43	0	0	1	0	0	0	1
ENST00000416860.2|ENSG00000238164.6|OTTHUMG00000000818.3|OTTHUMT00000002185.2|RP3-395M20.8-001|RP3-395M20.8|3522|	ENSMUST00000097750.2|ENSMUSG00000073686.2|OTTMUSG00000047135.1|OTTMUST00000121965.1|Gm10564-001|Gm10564|3113|	3522	3113	0.231407	5.08e-07	0	0	4	4	2	0	10	0	0	3	3	0	0	6
ENST00000438290.2|ENSG00000227640.2|OTTHUMG00000017213.2|OTTHUMT00000045471.2|SOX21-AS1-001|SOX21-AS1|3287|	ENSMUST00000164755.1|ENSMUSG00000090534.1|OTTMUSG00000036707.1|OTTMUST00000094043.1|Gm4675-001|Gm4675|2322|	3287	2322	0.23129	5.14e-07	1	0	2	2	0	0	5	1	1	0	0	0	2	4
ENST00000623193.1|ENSG00000279099.1|OTTHUMG00000163984.1|OTTHUMT00000376637.1|RP11-595O22.1-001|RP11-595O22.1|2262|	ENSMUST00000210926.1|ENSMUSG00000110263.1|OTTMUSG00000061097.1|OTTMUST00000149249.1|RP23-300I4.2-001|RP23-300I4.2|3831|	2262	3831	0.228669	6.54e-07	0	0	0	0	0	1	1	2	0	1	0	0	4	7
ENST00000538654.5|ENSG00000255717.6|OTTHUMG00000167743.1|OTTHUMT00000396019.1|SNHG1-003|SNHG1|2768|	ENSMUST00000205539.1|ENSMUSG00000108414.1|OTTMUSG00000057839.2|OTTMUST00000142024.1|Snhg1-002|Snhg1|2348|	2768	2348	0.226853	7.73e-07	1	1	0	0	0	1	3	1	1	0	0	0	1	3
ENST00000536780.6|ENSG00000255571.7|OTTHUMG00000171992.6|OTTHUMT00000416278.3|MIR9-3HG-001|MIR9-3HG|4778|	ENSMUST00000180881.2|ENSMUSG00000097023.8|OTTMUSG00000043217.2|OTTMUST00000113398.1|Mir9-3hg-002|Mir9-3hg|1847|	4778	1847	0.226533	7.96e-07	0	0	2	3	0	0	5	1	0	1	0	0	0	2
ENST00000605703.1|ENSG00000270523.1|OTTHUMG00000184197.1|OTTHUMT00000468277.1|RP11-145P16.3-001|RP11-145P16.3|360|	ENSMUST00000207190.1|ENSMUSG00000109332.1|OTTMUSG00000058932.1|OTTMUST00000144607.1|Gm44742-001|Gm44742|1412|	360	1412	0.226151	8.24e-07	0	0	0	0	0	1	1	1	0	0	0	0	1	2
ENST00000605703.1|ENSG00000270523.1|OTTHUMG00000184197.1|OTTHUMT00000468277.1|RP11-145P16.3-001|RP11-145P16.3|360|	ENSMUST00000208498.1|ENSMUSG00000109536.1|OTTMUSG00000058947.2|OTTMUST00000144638.2|9330162G02Rik-001|9330162G02Rik|30942|	360	30942	0.225778	8.53e-07	0	0	0	0	0	1	1	5	0	4	3	1	6	19
ENST00000415226.1|ENSG00000233611.3|OTTHUMG00000153089.2|OTTHUMT00000329483.2|AC079135.1-002|AC079135.1|552|	ENSMUST00000189763.1|ENSMUSG00000092627.2|OTTMUSG00000037279.2|OTTMUST00000123986.1|D130058E05Rik-003|D130058E05Rik|3030|	552	3030	0.224959	9.19e-07	0	0	0	0	0	0	0	0	1	3	1	0	0	5
ENST00000426356.1|ENSG00000225718.1|OTTHUMG00000156607.2|OTTHUMT00000344767.1|RP11-3P22.2-003|RP11-3P22.2|321|	ENSMUST00000192042.1|ENSMUSG00000103500.1|OTTMUSG00000047794.1|OTTMUST00000123040.1|Gm38373-001|Gm38373|288|	321	288	0.222727	1.13e-06	0	0	0	0	0	0	0	0	0	0	0	0	0	0
ENST00000512794.1|ENSG00000249519.1|OTTHUMG00000161115.1|OTTHUMT00000363852.1|LINC01438-001|LINC01438|556|	ENSMUST00000188986.1|ENSMUSG00000099640.1|OTTMUSG00000047631.1|OTTMUST00000122794.1|Gm28543-001|Gm28543|509|	556	509	0.222714	1.13e-06	0	0	0	0	0	0	0	0	0	0	0	0	0	0
ENST00000414452.1|ENSG00000232480.1|OTTHUMG00000039520.1|OTTHUMT00000095358.1|TGFB2-AS1-001|TGFB2-AS1|557|	ENSMUST00000189481.1|ENSMUSG00000100393.1|OTTMUSG00000045686.1|OTTMUST00000119601.1|Gm29491-001|Gm29491|506|	557	506	0.222039	1.2e-06	0	0	1	0	0	0	1	0	0	0	1	0	0	1
ENST00000434985.1|ENSG00000227681.5|OTTHUMG00000015769.1|OTTHUMT00000042614.1|RP11-307P5.1-003|RP11-307P5.1|413|	ENSMUST00000189903.1|ENSMUSG00000101926.1|OTTMUSG00000046526.1|OTTMUST00000121038.1|Gm28904-001|Gm28904|345|	413	345	0.221686	1.24e-06	0	1	0	0	0	0	1	0	0	0	0	0	0	0
ENST00000602652.1|ENSG00000269929.1|OTTHUMG00000183960.1|OTTHUMT00000467606.1|RP11-2B6.2-001|RP11-2B6.2|1435|	ENSMUST00000181490.2|ENSMUSG00000097375.2|OTTMUSG00000042780.2|OTTMUST00000112524.2|6720427I07Rik-001|6720427I07Rik|2300|	1435	2300	0.221638	1.24e-06	1	0	0	0	0	0	1	1	0	0	0	0	0	1
ENST00000560199.1|ENSG00000259238.1|OTTHUMG00000171925.1|OTTHUMT00000415935.1|RP11-361D15.2-001|RP11-361D15.2|402|	ENSMUST00000185564.1|ENSMUSG00000101555.1|OTTMUSG00000046494.1|OTTMUST00000120994.1|Gm28731-001|Gm28731|1569|	402	1569	0.221015	1.31e-06	0	0	1	1	0	0	2	0	0	2	1	0	0	3
ENST00000446206.1|ENSG00000237062.1|OTTHUMG00000020434.1|OTTHUMT00000053527.1|RP11-308N19.3-001|RP11-308N19.3|597|	ENSMUST00000190821.1|ENSMUSG00000099421.1|OTTMUSG00000047712.1|OTTMUST00000122925.1|Gm29067-001|Gm29067|470|	597	470	0.220049	1.43e-06	0	0	0	0	0	0	0	0	0	0	0	0	0	0
ENST00000426615.3|ENSG00000226363.3|OTTHUMG00000154176.3|OTTHUMT00000334247.3|HAGLROS-001|HAGLROS|1121|	ENSMUST00000143191.1|ENSMUSG00000085015.1|OTTMUSG00000016592.1|OTTMUST00000040108.1|Gm14424-001|Gm14424|895|	1121	895	0.219436	1.51e-06	0	0	1	1	0	0	2	0	0	0	0	0	0	0
ENST00000435312.5|ENSG00000230148.8|OTTHUMG00000132491.5|OTTHUMT00000255667.2|HOXB-AS1-001|HOXB-AS1|806|	ENSMUST00000131275.2|ENSMUSG00000084844.3|OTTMUSG00000001778.3|OTTMUST00000003568.2|Hoxb3os-002|Hoxb3os|2315|	806	2315	0.218934	1.58e-06	0	0	0	0	0	0	0	0	0	2	1	0	0	3
ENST00000413962.5|ENSG00000224043.7|OTTHUMG00000154855.2|OTTHUMT00000337382.1|CCNT2-AS1-002|CCNT2-AS1|636|	ENSMUST00000185310.1|ENSMUSG00000102014.1|OTTMUSG00000047797.1|OTTMUST00000123045.1|2900009J06Rik-002|2900009J06Rik|498|	636	498	0.218859	1.6e-06	0	0	0	0	0	0	0	0	0	0	0	0	0	0
ENST00000559298.5|ENSG00000259673.5|OTTHUMG00000172247.1|OTTHUMT00000417487.1|IQCH-AS1-003|IQCH-AS1|5753|	ENSMUST00000191455.6|ENSMUSG00000086539.8|OTTMUSG00000036542.2|OTTMUST00000119933.1|Gm16759-004|Gm16759|4272|	5753	4272	0.218272	1.68e-06	0	0	0	0	0	1	1	0	0	0	0	0	0	0
ENST00000559915.1|ENSG00000259237.1|OTTHUMG00000172483.1|OTTHUMT00000418736.1|RP11-209E8.1-001|RP11-209E8.1|601|	ENSMUST00000189842.1|ENSMUSG00000101526.1|OTTMUSG00000047483.1|OTTMUST00000122546.1|Gm28622-001|Gm28622|507|	601	507	0.217725	1.77e-06	0	0	0	0	0	0	0	0	0	0	0	0	1	1
ENST00000416061.1|ENSG00000232828.1|OTTHUMG00000021501.1|OTTHUMT00000056514.1|AF196970.3-001|AF196970.3|925|	ENSMUST00000126286.7|ENSMUSG00000087193.7|OTTMUSG00000018088.4|OTTMUST00000043666.1|Gm14820-001|Gm14820|1449|	925	1449	0.217276	1.84e-06	1	0	0	0	0	0	1	0	0	0	0	0	0	0
ENST00000426892.1|ENSG00000226087.1|OTTHUMG00000151712.2|OTTHUMT00000323596.2|AC106869.2-001|AC106869.2|591|	ENSMUST00000188990.1|ENSMUSG00000100847.1|OTTMUSG00000047267.1|OTTMUST00000122211.1|Gm28676-001|Gm28676|591|	591	591	0.215869	2.08e-06	0	0	1	0	0	0	1	0	0	1	1	0	0	2
ENST00000621095.1|ENSG00000275088.1|OTTHUMG00000187070.1|OTTHUMT00000474368.1|RP11-442O1.3-001|RP11-442O1.3|3306|	ENSMUST00000183235.1|ENSMUSG00000097960.1|OTTMUSG00000043041.1|OTTMUST00000112975.1|A330074K22Rik-001|A330074K22Rik|2489|	3306	2489	0.215092	2.23e-06	0	0	3	4	1	0	8	0	0	3	1	0	0	4
ENST00000426367.1|ENSG00000232412.1|OTTHUMG00000022338.2|OTTHUMT00000058167.2|RP1-315G1.3-001|RP1-315G1.3|326|	ENSMUST00000195000.1|ENSMUSG00000104042.1|OTTMUSG00000047266.1|OTTMUST00000122210.1|Gm37564-001|Gm37564|330|	326	330	0.214944	2.26e-06	0	0	0	0	0	0	0	0	0	0	0	0	0	0
ENST00000467155.6|ENSG00000233101.10|OTTHUMG00000159919.3|OTTHUMT00000408083.1|HOXB-AS3-016|HOXB-AS3|495|	ENSMUST00000150698.1|ENSMUSG00000085645.1|OTTMUSG00000001986.1|OTTMUST00000003989.1|Hoxb5os-001|Hoxb5os|596|	495	596	0.2148	2.29e-06	0	0	1	0	0	0	1	0	0	1	0	0	0	1
ENST00000433161.1|ENSG00000225978.3|OTTHUMG00000140136.1|OTTHUMT00000276287.1|HAR1A-001|HAR1A|1882|	ENSMUST00000183124.1|ENSMUSG00000098051.1|OTTMUSG00000043553.1|OTTMUST00000114313.1|Gm27032-001|Gm27032|1116|	1882	1116	0.214358	2.38e-06	0	0	2	2	0	0	4	0	0	1	2	0	0	3
ENST00000630360.1|ENSG00000281880.1|OTTHUMG00000189576.1|OTTHUMT00000479996.1|PAUPAR-001|PAUPAR|2965|	ENSMUST00000194826.1|ENSMUSG00000102424.1|OTTMUSG00000042881.1|OTTMUST00000112669.1|Paupar-001|Paupar|2831|	2965	2831	0.214045	2.45e-06	2	0	2	1	1	3	9	1	1	1	1	0	4	8
ENST00000550279.1|ENSG00000258338.1|OTTHUMG00000169737.1|OTTHUMT00000405667.1|RP11-87P13.2-001|RP11-87P13.2|742|	ENSMUST00000195090.1|ENSMUSG00000103775.1|OTTMUSG00000047459.1|OTTMUST00000122516.1|Gm36997-001|Gm36997|707|	742	707	0.212956	2.7e-06	0	0	0	0	0	0	0	0	0	0	0	0	0	0
ENST00000437598.1|ENSG00000224235.1|OTTHUMG00000037985.1|OTTHUMT00000092710.1|RP5-1027O11.1-001|RP5-1027O11.1|787|	ENSMUST00000192421.1|ENSMUSG00000103816.1|OTTMUSG00000047662.1|OTTMUST00000122838.1|Gm38006-001|Gm38006|697|	787	697	0.212238	2.88e-06	0	0	0	0	0	0	0	1	0	0	0	0	0	1
ENST00000429901.1|ENSG00000231721.6|OTTHUMG00000155000.2|OTTHUMT00000338004.1|LINC-PINT-003|LINC-PINT|565|	ENSMUST00000115107.7|ENSMUSG00000044471.11|OTTMUSG00000014734.2|OTTMUST00000034979.2|Lncpint-001|Lncpint|1676|	565	1676	0.211881	2.97e-06	0	0	1	0	0	0	1	0	0	1	0	0	0	1
ENST00000612722.1|ENSG00000275620.1|OTTHUMG00000187005.1|OTTHUMT00000474230.1|FLJ16779-001|FLJ16779|7638|	ENSMUST00000183124.1|ENSMUSG00000098051.1|OTTMUSG00000043553.1|OTTMUST00000114313.1|Gm27032-001|Gm27032|1116|	7638	1116	0.210251	3.43e-06	1	1	3	5	0	0	10	0	0	1	2	0	0	3
ENST00000599172.2|ENSG00000268050.2|OTTHUMG00000183020.2|OTTHUMT00000464676.2|RP11-247A12.8-001|RP11-247A12.8|696|	ENSMUST00000145389.2|ENSMUSG00000085224.2|OTTMUSG00000012072.2|OTTMUST00000028723.2|Gm13425-001|Gm13425|5391|	696	5391	0.210167	3.45e-06	0	0	0	0	0	0	0	1	0	6	6	0	0	13
ENST00000420659.1|ENSG00000229537.5|OTTHUMG00000009147.1|OTTHUMT00000025346.1|RP11-5P4.1-001|RP11-5P4.1|445|	ENSMUST00000193877.1|ENSMUSG00000103097.1|OTTMUSG00000047722.2|OTTMUST00000122936.2|Gm37556-001|Gm37556|468|	445	468	0.20938	3.7e-06	0	0	0	0	0	0	0	0	0	0	0	0	0	0
ENST00000602385.1|ENSG00000270141.3|OTTHUMG00000184024.1|OTTHUMT00000467796.1|TERC-001|TERC|541|	ENSMUST00000193960.1|ENSMUSG00000102505.1|OTTMUSG00000051957.1|OTTMUST00000130751.1|1600017P15Rik-001|1600017P15Rik|890|	541	890	0.208923	3.85e-06	1	0	1	1	0	0	3	2	0	0	1	0	1	4
ENST00000526934.1|ENSG00000254863.1|OTTHUMG00000166136.1|OTTHUMT00000388010.1|RP11-831A10.2-001|RP11-831A10.2|479|	ENSMUST00000186146.1|ENSMUSG00000100836.1|OTTMUSG00000047479.1|OTTMUST00000122541.1|Gm28215-001|Gm28215|346|	479	346	0.208668	3.94e-06	0	0	0	0	0	0	0	0	0	0	0	0	0	0
ENST00000503685.2|ENSG00000251044.2|OTTHUMG00000162485.2|OTTHUMT00000369117.2|CTD-2582M21.1-001|CTD-2582M21.1|371|	ENSMUST00000190179.1|ENSMUSG00000099774.1|OTTMUSG00000045529.1|OTTMUST00000119368.1|Gm29341-001|Gm29341|370|	371	370	0.208645	3.95e-06	0	0	0	0	0	0	0	0	0	1	0	0	0	1
ENST00000606932.1|ENSG00000271774.1|OTTHUMG00000185603.1|OTTHUMT00000470820.1|RP4-678D15.1-001|RP4-678D15.1|724|	ENSMUST00000180945.1|ENSMUSG00000096972.7|-|-|Gm26883-201|Gm26883|4878|	724	4878	0.208321	4.06e-06	0	0	0	0	0	0	0	0	3	1	1	0	1	6
ENST00000435981.5|ENSG00000225535.6|OTTHUMG00000065346.3|OTTHUMT00000140193.1|LINC01393-001|LINC01393|1187|	ENSMUST00000201757.1|ENSMUSG00000107022.1|OTTMUSG00000055810.1|OTTMUST00000138127.1|Gm36669-001|Gm36669|3650|	1187	3650	0.208066	4.15e-06	1	0	0	0	0	1	2	2	0	0	0	0	3	5
ENST00000624417.1|ENSG00000279692.1|OTTHUMG00000176097.1|OTTHUMT00000431502.1|RP11-1055B8.1-001|RP11-1055B8.1|1536|	ENSMUST00000139014.1|ENSMUSG00000043993.6|OTTMUSG00000004130.2|OTTMUST00000009324.2|2900052L18Rik-001|2900052L18Rik|1588|	1536	1588	0.207771	4.26e-06	1	0	1	3	0	0	5	0	0	1	1	0	0	2
ENST00000636668.1|ENSG00000283638.1|OTTHUMG00000191855.1|OTTHUMT00000490838.1|MIR19B2-001|MIR19B2|3863|	ENSMUST00000138156.1|ENSMUSG00000086173.7|OTTMUSG00000017339.2|OTTMUST00000042258.1|Kis2-002|Kis2|878|	3863	878	0.206533	4.74e-06	3	1	2	1	1	0	8	0	1	1	0	0	0	2
ENST00000501122.2|ENSG00000245532.6|OTTHUMG00000166321.6|OTTHUMT00000389142.3|NEAT1-001|NEAT1|22743|	ENSMUST00000172812.2|ENSMUSG00000092341.2|OTTMUSG00000037798.2|OTTMUST00000097547.2|Malat1-001|Malat1|6983|	22743	6983	0.206353	4.82e-06	12	4	1	2	2	19	40	1	2	0	0	0	2	5
ENST00000430518.2|ENSG00000227544.8|OTTHUMG00000155058.5|OTTHUMT00000338273.2|AC018647.3-004|AC018647.3|844|	ENSMUST00000185935.1|ENSMUSG00000100824.1|OTTMUSG00000046469.1|OTTMUST00000120960.1|Gm29375-001|Gm29375|447|	844	447	0.205242	5.31e-06	0	0	0	0	0	0	0	0	0	0	0	0	0	0
ENST00000635467.1|ENSG00000283053.1|OTTHUMG00000191588.1|OTTHUMT00000488690.1|RP11-30G13.1-001|RP11-30G13.1|1469|	ENSMUST00000178904.1|ENSMUSG00000094707.1|OTTMUSG00000042306.1|OTTMUST00000111317.1|A830019P07Rik-001|A830019P07Rik|1777|	1469	1777	0.204442	5.69e-06	1	0	0	0	0	1	2	0	0	0	0	1	1	2
ENST00000564832.1|ENSG00000260838.3|OTTHUMG00000164521.2|OTTHUMT00000379092.2|RP11-531A24.3-001|RP11-531A24.3|3296|	ENSMUST00000194564.1|ENSMUSG00000104149.1|OTTMUSG00000049211.1|OTTMUST00000125550.1|Gm37138-001|Gm37138|2089|	3296	2089	0.2037	6.06e-06	0	0	0	0	0	2	2	2	0	1	0	0	5	8
ENST00000421318.1|ENSG00000224583.1|OTTHUMG00000015045.1|OTTHUMT00000041236.1|RP11-554D15.4-001|RP11-554D15.4|441|	ENSMUST00000190463.1|ENSMUSG00000102020.1|OTTMUSG00000047484.1|OTTMUST00000122547.1|Gm28620-001|Gm28620|439|	441	439	0.20366	6.09e-06	0	0	0	0	0	0	0	0	0	0	0	0	0	0
ENST00000429892.5|ENSG00000212694.8|OTTHUMG00000128905.2|OTTHUMT00000250874.1|LINC01089-001|LINC01089|1521|	ENSMUST00000159637.7|ENSMUSG00000090086.7|OTTMUSG00000026886.2|OTTMUST00000066498.1|AI480526-007|AI480526|1697|	1521	1697	0.202774	6.57e-06	1	0	3	2	0	0	6	0	0	0	0	0	1	1
ENST00000548617.1|ENSG00000257477.1|OTTHUMG00000169932.1|OTTHUMT00000406600.1|LINC01154-001|LINC01154|454|	ENSMUST00000193409.1|ENSMUSG00000104327.1|OTTMUSG00000047306.1|OTTMUST00000122303.1|Gm37322-001|Gm37322|337|	454	337	0.202687	6.62e-06	0	0	1	1	0	0	2	0	0	1	1	0	0	2
ENST00000512720.1|ENSG00000250751.1|OTTHUMG00000161697.1|OTTHUMT00000365763.1|RP11-613C6.2-001|RP11-613C6.2|575|	ENSMUST00000189860.1|ENSMUSG00000101258.1|OTTMUSG00000046866.1|OTTMUST00000121534.1|Gm29477-001|Gm29477|499|	575	499	0.201453	7.36e-06	0	0	0	1	0	0	1	0	0	1	0	0	0	1
ENST00000456917.1|ENSG00000234883.4|OTTHUMG00000078367.1|OTTHUMT00000171187.1|MIR155HG-001|MIR155HG|1600|	ENSMUST00000180991.2|ENSMUSG00000097418.7|OTTMUSG00000047282.2|OTTMUST00000122235.1|Mir155hg-001|Mir155hg|1264|	1600	1264	0.201338	7.43e-06	1	0	0	0	0	0	1	0	0	0	0	0	0	0
ENST00000499732.2|ENSG00000245532.6|OTTHUMG00000166321.6|OTTHUMT00000389141.2|NEAT1-002|NEAT1|1811|	ENSMUST00000174287.1|ENSMUSG00000092274.2|OTTMUSG00000037797.2|OTTMUST00000097544.1|Neat1-002|Neat1|3004|	1811	3004	0.2012	7.52e-06	0	0	0	0	0	0	0	0	1	0	0	0	0	1
ENST00000344893.4|ENSG00000197332.8|OTTHUMG00000182037.2|OTTHUMT00000458891.2|CTC-499B15.5-001|CTC-499B15.5|3383|	ENSMUST00000211082.1|ENSMUSG00000109765.1|OTTMUSG00000060857.1|OTTMUST00000148704.1|RP23-187B11.6-001|RP23-187B11.6|1699|	3383	1699	0.201089	7.59e-06	0	0	0	0	0	0	0	0	0	0	0	0	0	0
ENST00000450977.2|ENSG00000235139.2|OTTHUMG00000154603.3|OTTHUMT00000336286.3|AC003984.1-001|AC003984.1|4104|	ENSMUST00000200088.1|ENSMUSG00000105366.1|OTTMUSG00000054702.1|OTTMUST00000135594.1|Gm43719-001|Gm43719|2199|	4104	2199	0.201063	7.61e-06	3	0	0	0	0	3	6	1	0	0	0	0	2	3
ENST00000614966.1|ENSG00000274667.1|OTTHUMG00000186904.1|OTTHUMT00000473988.1|RP11-31H5.3-001|RP11-31H5.3|680|	ENSMUST00000193207.1|ENSMUSG00000102225.1|OTTMUSG00000044779.2|OTTMUST00000117713.2|Gm37983-001|Gm37983|2006|	680	2006	0.20062	7.9e-06	0	0	0	0	0	0	0	2	0	1	0	0	2	5
ENST00000412754.1|ENSG00000236305.1|OTTHUMG00000157041.1|OTTHUMT00000347232.1|RP11-126L15.4-001|RP11-126L15.4|369|	ENSMUST00000197762.1|ENSMUSG00000106237.1|OTTMUSG00000054538.1|OTTMUST00000135200.1|Gm8066-001|Gm8066|485|	369	485	0.200023	8.32e-06	0	0	0	0	0	0	0	0	0	1	1	0	0	2
ENST00000602755.1|ENSG00000270066.3|OTTHUMG00000184013.1|OTTHUMT00000467753.1|SCARNA2-001|SCARNA2|427|	ENSMUST00000148844.1|ENSMUSG00000084863.1|OTTMUSG00000007302.2|OTTMUST00000016873.2|Gm12523-001|Gm12523|599|	427	599	0.199472	8.72e-06	0	1	1	1	0	0	3	1	0	2	2	0	0	5
ENST00000552334.1|ENSG00000257151.1|OTTHUMG00000170276.1|OTTHUMT00000408286.1|PWAR6-001|PWAR6|4618|	ENSMUST00000207198.1|ENSMUSG00000109122.1|OTTMUSG00000058962.1|OTTMUST00000144655.1|A230103L15Rik-001|A230103L15Rik|3872|	4618	3872	0.198664	9.34e-06	2	1	0	0	0	5	8	0	0	0	0	0	0	0
ENST00000437322.2|ENSG00000234390.4|OTTHUMG00000024154.2|OTTHUMT00000060838.2|USP27X-AS1-001|USP27X-AS1|2175|	ENSMUST00000128858.1|ENSMUSG00000087252.1|OTTMUSG00000016482.1|OTTMUST00000039771.1|Gm14379-001|Gm14379|1878|	2175	1878	0.198111	9.79e-06	0	0	0	1	0	0	1	0	0	1	1	0	0	2
ENST00000430387.1|ENSG00000237359.1|OTTHUMG00000019458.1|OTTHUMT00000051552.1|RP11-509J21.2-001|RP11-509J21.2|728|	ENSMUST00000186880.1|ENSMUSG00000101084.1|OTTMUSG00000047869.1|OTTMUST00000123137.1|Gm28228-001|Gm28228|632|	728	632	0.198016	9.87e-06	1	0	0	0	0	1	2	0	0	0	0	0	0	0
ENST00000543403.1|ENSG00000256684.1|OTTHUMG00000167709.1|OTTHUMT00000395753.1|RP11-49K4.2-001|RP11-49K4.2|404|	ENSMUST00000187030.1|ENSMUSG00000099788.1|OTTMUSG00000047477.1|OTTMUST00000122539.1|Gm29176-001|Gm29176|368|	404	368	0.197947	9.93e-06	0	0	0	0	0	0	0	0	0	0	0	0	0	0
ENST00000507674.1|ENSG00000249404.1|OTTHUMG00000161916.1|OTTHUMT00000366373.1|CTD-2234B20.1-001|CTD-2234B20.1|440|	ENSMUST00000195665.1|ENSMUSG00000102810.1|OTTMUSG00000047325.1|OTTMUST00000122327.1|Gm37815-001|Gm37815|411|	440	411	0.19784	1e-05	0	0	0	0	0	0	0	0	0	0	0	1	0	1
ENST00000413812.1|ENSG00000236340.5|OTTHUMG00000063970.2|OTTHUMT00000138168.2|AC000099.1-001|AC000099.1|1912|	ENSMUST00000202562.1|ENSMUSG00000107377.1|OTTMUSG00000056087.1|OTTMUST00000138664.1|Gm42801-001|Gm42801|2865|	1912	2865	0.197309	1.05e-05	0	0	0	0	0	0	0	2	0	0	0	0	2	4
ENST00000454285.1|ENSG00000227947.1|OTTHUMG00000007956.1|OTTHUMT00000021838.1|RP11-543D5.1-001|RP11-543D5.1|815|	ENSMUST00000189251.1|ENSMUSG00000100998.1|OTTMUSG00000047729.1|OTTMUST00000122944.1|Gm28864-001|Gm28864|644|	815	644	0.197335	1.05e-05	0	0	0	0	0	0	0	0	0	0	0	0	0	0
ENST00000567968.2|ENSG00000224888.4|OTTHUMG00000156775.4|OTTHUMT00000423096.2|RP5-1142A6.2-003|RP5-1142A6.2|4528|	ENSMUST00000162198.1|ENSMUSG00000090174.1|OTTMUSG00000027607.1|OTTMUST00000068333.1|Gm10612-001|Gm10612|1681|	4528	1681	0.197128	1.06e-05	0	0	5	5	0	0	10	0	0	0	0	0	0	0
ENST00000519741.1|ENSG00000254377.5|OTTHUMG00000164360.2|OTTHUMT00000378437.1|MIR124-2HG-005|MIR124-2HG|2214|	ENSMUST00000188983.6|ENSMUSG00000100252.6|OTTMUSG00000046651.1|OTTMUST00000121238.1|Mir124-2hg-001|Mir124-2hg|1365|	2214	1365	0.195956	1.17e-05	0	0	1	1	0	0	2	0	0	1	0	0	0	1
ENST00000609776.1|ENSG00000272944.1|OTTHUMG00000186317.1|OTTHUMT00000472862.1|CTD-2308L22.1-001|CTD-2308L22.1|1949|	ENSMUST00000189147.1|ENSMUSG00000101849.1|OTTMUSG00000047780.1|OTTMUST00000123019.1|Gm28386-001|Gm28386|1849|	1949	1849	0.195791	1.19e-05	0	0	2	3	0	0	5	0	1	2	2	0	0	5
ENST00000441473.1|ENSG00000232413.1|OTTHUMG00000020685.1|OTTHUMT00000054108.1|RP11-343J18.2-001|RP11-343J18.2|316|	ENSMUST00000134921.1|ENSMUSG00000087461.2|OTTMUSG00000051201.1|OTTMUST00000028111.1|C230014O12Rik-001|C230014O12Rik|2668|	316	2668	0.194879	1.29e-05	0	0	0	0	0	0	0	1	0	0	1	0	2	4
ENST00000552926.1|ENSG00000257612.1|OTTHUMG00000170436.1|OTTHUMT00000409122.1|MIR4307HG-002|MIR4307HG|388|	ENSMUST00000195244.1|ENSMUSG00000104308.1|OTTMUSG00000047422.1|OTTMUST00000122465.1|Gm36971-001|Gm36971|378|	388	378	0.194555	1.32e-05	0	0	0	0	0	0	0	0	0	0	0	0	1	1
ENST00000607625.1|ENSG00000271862.1|OTTHUMG00000185533.1|OTTHUMT00000470668.1|RP11-343L5.2-001|RP11-343L5.2|1589|	ENSMUST00000044500.5|ENSMUSG00000089940.1|OTTMUSG00000033529.2|OTTMUST00000084374.2|Gm4117-001|Gm4117|52401|	1589	52401	0.194528	1.33e-05	1	0	1	0	0	0	2	13	2	8	1	3	30	57
ENST00000419578.1|ENSG00000224308.1|OTTHUMG00000012449.1|OTTHUMT00000034662.1|LINC01527-005|LINC01527|1997|	ENSMUST00000200051.1|ENSMUSG00000105476.1|OTTMUSG00000052638.1|OTTMUST00000131884.1|Gm43740-001|Gm43740|4809|	1997	4809	0.194168	1.37e-05	0	0	0	0	0	0	0	1	0	1	0	0	2	4
ENST00000623569.1|ENSG00000280213.1|OTTHUMG00000187354.1|OTTHUMT00000474801.1|UCKL1-AS1-001|UCKL1-AS1|3602|	ENSMUST00000122831.1|ENSMUSG00000010492.10|OTTMUSG00000030649.1|OTTMUST00000075883.1|Uckl1os-003|Uckl1os|2018|	3602	2018	0.194032	1.38e-05	1	1	3	2	0	0	7	0	0	2	0	0	0	2
ENST00000564401.1|ENSG00000259941.1|OTTHUMG00000176401.1|OTTHUMT00000431908.1|RP11-48G14.2-001|RP11-48G14.2|2465|	ENSMUST00000192251.1|ENSMUSG00000102672.1|OTTMUSG00000044720.1|OTTMUST00000117590.1|Gm37105-001|Gm37105|2085|	2465	2085	0.193335	1.46e-05	0	0	0	0	0	1	1	0	0	0	0	0	0	0
ENST00000412132.1|ENSG00000234427.1|OTTHUMG00000014261.1|OTTHUMT00000039866.1|RP3-413H6.2-001|RP3-413H6.2|554|	ENSMUST00000192605.1|ENSMUSG00000103479.1|OTTMUSG00000047403.1|OTTMUST00000122435.1|Gm37698-001|Gm37698|463|	554	463	0.193024	1.5e-05	0	0	0	0	0	0	0	0	0	0	0	0	0	0
ENST00000524166.1|ENSG00000251136.8|OTTHUMG00000163788.3|OTTHUMT00000375477.1|RP11-37B2.1-003|RP11-37B2.1|836|	ENSMUST00000193345.1|ENSMUSG00000103595.1|OTTMUSG00000047705.1|OTTMUST00000122916.1|Gm37355-001|Gm37355|606|	836	606	0.192266	1.6e-05	0	0	0	0	0	1	1	0	0	0	0	0	1	1
ENST00000473756.1|ENSG00000240476.1|OTTHUMG00000159060.1|OTTHUMT00000353102.1|LINC00973-001|LINC00973|962|	ENSMUST00000193141.1|ENSMUSG00000104456.1|OTTMUSG00000047845.1|OTTMUST00000123107.1|Gm37825-001|Gm37825|904|	962	904	0.192239	1.61e-05	0	0	0	0	0	0	0	0	0	0	0	0	1	1
ENST00000602573.1|ENSG00000269893.6|OTTHUMG00000183991.1|OTTHUMT00000467707.1|SNHG8-005|SNHG8|570|	ENSMUST00000198509.1|ENSMUSG00000104960.1|OTTMUSG00000052554.1|OTTMUST00000131755.1|Snhg8-003|Snhg8|776|	570	776	0.191718	1.68e-05	0	0	0	0	0	0	0	0	0	0	0	0	0	0
ENST00000370257.1|ENSG00000203900.2|OTTHUMG00000032958.2|OTTHUMT00000280681.1|RP11-261N11.8-002|RP11-261N11.8|3264|	ENSMUST00000183124.1|ENSMUSG00000098051.1|OTTMUSG00000043553.1|OTTMUST00000114313.1|Gm27032-001|Gm27032|1116|	3264	1116	0.191715	1.68e-05	0	0	4	4	0	0	8	0	0	1	2	0	0	3
ENST00000419531.2|ENSG00000234807.5|OTTHUMG00000008377.2|OTTHUMT00000467304.1|LINC01135-002|LINC01135|996|	ENSMUST00000191391.1|ENSMUSG00000100189.1|OTTMUSG00000047386.1|OTTMUST00000122414.1|Gm28096-001|Gm28096|824|	996	824	0.191497	1.71e-05	0	0	0	0	0	0	0	0	0	0	0	0	0	0
ENST00000508724.1|ENSG00000249618.5|OTTHUMG00000161197.1|OTTHUMT00000364128.1|RP11-422J15.1-002|RP11-422J15.1|503|	ENSMUST00000193848.1|ENSMUSG00000103426.1|OTTMUSG00000047591.1|OTTMUST00000122729.1|Gm37533-001|Gm37533|545|	503	545	0.191343	1.73e-05	0	0	0	0	0	0	0	0	0	0	0	0	0	0
ENST00000537269.1|ENSG00000257084.1|OTTHUMG00000169234.1|OTTHUMT00000402989.1|U47924.27-001|U47924.27|350|	ENSMUST00000189387.1|ENSMUSG00000099609.1|OTTMUSG00000047426.2|OTTMUST00000122469.2|Gm29008-001|Gm29008|298|	350	298	0.191322	1.73e-05	0	0	0	0	0	0	0	0	0	0	0	0	0	0
ENST00000532946.1|ENSG00000255108.1|OTTHUMG00000165497.1|OTTHUMT00000384479.1|AP006621.8-001|AP006621.8|536|	ENSMUST00000097947.3|ENSMUSG00000073787.4|OTTMUSG00000036655.3|OTTMUST00000093932.1|Gm10575-001|Gm10575|1671|	536	1671	0.189806	1.97e-05	0	0	0	1	0	0	1	0	0	3	3	0	0	6
ENST00000587092.3|ENSG00000267757.4|OTTHUMG00000182128.1|OTTHUMT00000459638.1|EML2-AS1-003|EML2-AS1|599|	ENSMUST00000098778.2|ENSMUSG00000074355.2|OTTMUSG00000058458.1|OTTMUST00000143577.1|Gm10676-001|Gm10676|3221|	599	3221	0.189701	1.98e-05	0	0	1	1	1	0	3	2	0	2	4	0	0	8
ENST00000479766.1|ENSG00000240990.9|OTTHUMG00000158205.3|OTTHUMT00000140061.1|HOXA11-AS-005|HOXA11-AS|822|	ENSMUST00000137729.1|ENSMUSG00000086427.8|OTTMUSG00000018876.2|OTTMUST00000045404.1|Hoxa11os-005|Hoxa11os|885|	822	885	0.189139	2.08e-05	0	0	0	0	0	0	0	0	0	1	1	0	0	2
ENST00000560586.1|ENSG00000259534.1|OTTHUMG00000171858.1|OTTHUMT00000415474.1|RP11-522B15.7-001|RP11-522B15.7|542|	ENSMUST00000188229.1|ENSMUSG00000099387.1|OTTMUSG00000047446.1|OTTMUST00000122499.1|Gm29327-001|Gm29327|388|	542	388	0.189	2.1e-05	0	0	0	0	0	0	0	0	0	0	0	0	0	0
ENST00000624610.1|ENSG00000279722.1|OTTHUMG00000173215.1|OTTHUMT00000422488.1|RP11-44F14.6-001|RP11-44F14.6|2337|	ENSMUST00000210054.1|ENSMUSG00000109828.1|OTTMUSG00000061469.1|OTTMUST00000150003.1|RP24-156K15.5-001|RP24-156K15.5|2098|	2337	2098	0.188395	2.21e-05	2	1	0	0	0	2	5	3	0	0	0	0	5	8
ENST00000447880.1|ENSG00000229915.1|OTTHUMG00000152867.1|OTTHUMT00000328303.1|AC016999.2-001|AC016999.2|452|	ENSMUST00000187564.1|ENSMUSG00000100980.1|OTTMUSG00000048551.1|OTTMUST00000124402.1|Gm29100-001|Gm29100|4410|	452	4410	0.188191	2.25e-05	1	0	1	1	0	0	3	0	0	3	0	0	0	3
ENST00000623193.1|ENSG00000279099.1|OTTHUMG00000163984.1|OTTHUMT00000376637.1|RP11-595O22.1-001|RP11-595O22.1|2262|	ENSMUST00000209370.1|ENSMUSG00000109648.1|OTTMUSG00000061098.1|OTTMUST00000149250.1|RP23-300I4.1-001|RP23-300I4.1|3940|	2262	3940	0.188046	2.27e-05	0	0	0	0	0	1	1	1	0	1	0	0	3	5
ENST00000429634.1|ENSG00000233590.1|OTTHUMG00000018345.1|OTTHUMT00000048311.1|RP11-153K11.3-002|RP11-153K11.3|417|	ENSMUST00000193990.1|ENSMUSG00000104481.1|OTTMUSG00000047467.1|OTTMUST00000122527.1|Gm38063-001|Gm38063|342|	417	342	0.188026	2.28e-05	0	0	0	0	0	0	0	0	0	0	0	0	0	0
ENST00000430551.2|ENSG00000234781.2|OTTHUMG00000153051.2|OTTHUMT00000329246.2|LINC01103-001|LINC01103|1457|	ENSMUST00000190148.1|ENSMUSG00000100180.1|OTTMUSG00000047469.1|OTTMUST00000122531.1|Gm28140-001|Gm28140|1271|	1457	1271	0.187735	2.33e-05	0	0	0	0	0	0	0	0	0	0	0	1	0	1
ENST00000604392.1|ENSG00000230910.2|OTTHUMG00000014981.2|OTTHUMT00000468342.1|RP3-525N10.2-002|RP3-525N10.2|2365|	ENSMUST00000194343.1|ENSMUSG00000104516.1|OTTMUSG00000046026.1|OTTMUST00000120205.1|Gm9884-001|Gm9884|1222|	2365	1222	0.187222	2.43e-05	0	2	0	0	0	1	3	0	1	0	0	0	1	2
ENST00000575922.5|ENSG00000260005.6|OTTHUMG00000132137.2|OTTHUMT00000439327.1|AC027601.1-002|AC027601.1|4506|	ENSMUST00000143428.1|ENSMUSG00000086924.1|OTTMUSG00000004050.1|OTTMUST00000009027.1|Gm11766-001|Gm11766|3018|	4506	3018	0.186863	2.51e-05	1	1	3	6	2	0	13	0	0	2	2	0	0	4
ENST00000554737.2|ENSG00000258813.2|OTTHUMG00000171423.2|OTTHUMT00000413347.2|RP11-109N23.4-001|RP11-109N23.4|1000|	ENSMUST00000183323.2|ENSMUSG00000099708.1|OTTMUSG00000047091.1|OTTMUST00000121888.1|Gm29361-001|Gm29361|2000|	1000	2000	0.186438	2.6e-05	0	0	0	0	0	0	0	0	0	1	1	0	0	2
ENST00000567488.1|ENSG00000261826.1|OTTHUMG00000175815.1|OTTHUMT00000431121.1|RP11-691G17.1-001|RP11-691G17.1|2709|	ENSMUST00000180936.1|ENSMUSG00000097258.1|-|-|Gm26767-201|Gm26767|4476|	2709	4476	0.186281	2.63e-05	0	0	0	0	0	0	0	0	0	0	0	0	1	1
ENST00000505289.5|ENSG00000250241.5|OTTHUMG00000161299.2|OTTHUMT00000364454.1|RP11-9G1.3-001|RP11-9G1.3|2820|	ENSMUST00000192347.1|ENSMUSG00000103477.1|OTTMUSG00000051980.1|OTTMUST00000130796.1|5930409G06Rik-001|5930409G06Rik|1544|	2820	1544	0.185566	2.79e-05	2	0	0	0	0	3	5	2	0	0	0	0	2	4
ENST00000608517.1|ENSG00000273062.1|OTTHUMG00000186473.1|OTTHUMT00000473212.1|RP11-428K3.1-001|RP11-428K3.1|1980|	ENSMUST00000186765.1|ENSMUSG00000101905.1|OTTMUSG00000049724.1|OTTMUST00000126674.1|4930439D14Rik-001|4930439D14Rik|359|	1980	359	0.185386	2.83e-05	2	0	3	2	0	0	7	0	0	1	1	0	0	2
ENST00000624034.1|ENSG00000196366.3|OTTHUMG00000131725.1|OTTHUMT00000254644.1|C9orf163-001|C9orf163|2573|	ENSMUST00000151069.1|ENSMUSG00000087612.1|OTTMUSG00000012624.1|OTTMUST00000030053.1|A230005M16Rik-002|A230005M16Rik|1022|	2573	1022	0.185319	2.85e-05	1	0	1	3	0	0	5	0	1	1	1	1	1	5
ENST00000623679.1|ENSG00000279518.1|OTTHUMG00000172341.1|OTTHUMT00000418011.1|AC083843.4-001|AC083843.4|2186|	ENSMUST00000192781.1|ENSMUSG00000104324.1|OTTMUSG00000042918.1|OTTMUST00000112736.1|Gm37320-001|Gm37320|4953|	2186	4953	0.184781	2.97e-05	0	1	0	0	0	0	1	1	0	0	1	0	1	3
ENST00000462305.5|ENSG00000244479.6|OTTHUMG00000158050.1|OTTHUMT00000350082.1|OR2A1-AS1-005|OR2A1-AS1|773|	ENSMUST00000203086.1|ENSMUSG00000108190.1|OTTMUSG00000057500.1|OTTMUST00000141396.1|Gm44731-001|Gm44731|542|	773	542	0.184748	2.98e-05	0	0	1	1	0	0	2	0	0	1	2	0	0	3
ENST00000425916.4|ENSG00000237149.5|OTTHUMG00000018528.4|OTTHUMT00000048832.3|ZNF503-AS2-002|ZNF503-AS2|2026|	ENSMUST00000194287.1|ENSMUSG00000103160.1|OTTMUSG00000042993.1|OTTMUST00000112847.1|C130012C08Rik-001|C130012C08Rik|3665|	2026	3665	0.184365	3.08e-05	1	0	3	3	0	0	7	1	0	2	1	0	0	4
ENST00000581080.1|ENSG00000265666.1|OTTHUMG00000179631.1|OTTHUMT00000447446.1|RARA-AS1-001|RARA-AS1|1790|	ENSMUST00000141696.1|ENSMUSG00000075576.12|OTTMUSG00000006457.2|OTTMUST00000014761.1|Gm12359-003|Gm12359|713|	1790	713	0.184252	3.1e-05	0	0	4	2	0	0	6	0	0	1	1	0	0	2
ENST00000464242.1|ENSG00000244300.2|OTTHUMG00000159693.1|OTTHUMT00000356937.1|GATA2-AS1-002|GATA2-AS1|1163|	ENSMUST00000203855.1|ENSMUSG00000108010.1|OTTMUSG00000057341.1|OTTMUST00000141090.1|Gm44246-001|Gm44246|677|	1163	677	0.184009	3.17e-05	0	1	2	1	0	0	4	0	0	1	0	0	0	1
ENST00000429368.1|ENSG00000223403.3|OTTHUMG00000029067.3|OTTHUMT00000072600.2|MEG9-001|MEG9|2638|	ENSMUST00000183084.1|ENSMUSG00000097391.8|OTTMUSG00000043213.2|OTTMUST00000113372.1|Mirg-003|Mirg|1553|	2638	1553	0.183257	3.37e-05	0	0	1	1	0	0	2	0	1	1	2	0	0	4
ENST00000562811.1|ENSG00000260941.1|OTTHUMG00000176048.1|OTTHUMT00000431421.1|LINC00622-001|LINC00622|1570|	ENSMUST00000196040.1|ENSMUSG00000105909.1|OTTMUSG00000054012.1|OTTMUST00000134269.1|Gm43189-001|Gm43189|3069|	1570	3069	0.182863	3.48e-05	1	0	0	0	0	3	4	3	1	0	0	1	3	8
ENST00000449643.1|ENSG00000233642.1|OTTHUMG00000017830.1|OTTHUMT00000047246.1|GPR158-AS1-001|GPR158-AS1|2433|	ENSMUST00000133391.1|ENSMUSG00000085680.1|OTTMUSG00000011439.1|OTTMUST00000026782.1|Gm13327-001|Gm13327|2741|	2433	2741	0.182807	3.49e-05	0	0	0	0	0	0	0	0	0	0	0	0	0	0
ENST00000580897.1|ENSG00000264769.1|OTTHUMG00000178434.1|OTTHUMT00000441950.1|RP11-498C9.12-001|RP11-498C9.12|563|	ENSMUST00000151998.1|ENSMUSG00000053613.6|OTTMUSG00000004079.1|OTTMUST00000009152.1|Notumos-001|Notumos|2659|	563	2659	0.18249	3.58e-05	0	0	1	2	0	0	3	2	0	3	1	0	0	6
ENST00000618857.1|ENSG00000278768.1|OTTHUMG00000188154.1|OTTHUMT00000476381.1|BACE1-AS-002|BACE1-AS|774|	ENSMUST00000162209.1|ENSMUSG00000089810.1|OTTMUSG00000034968.2|OTTMUST00000088918.2|Gm16536-001|Gm16536|1589|	774	1589	0.181955	3.74e-05	0	0	1	1	1	0	3	0	0	0	0	0	0	0
ENST00000621933.1|ENSG00000274536.5|OTTHUMG00000188128.1|OTTHUMT00000476244.1|MIR223-001|MIR223|1815|	ENSMUST00000147681.1|ENSMUSG00000078122.4|OTTMUSG00000018496.2|OTTMUST00000044608.1|F630028O10Rik-002|F630028O10Rik|3255|	1815	3255	0.180428	4.23e-05	0	0	0	0	0	2	2	1	0	0	0	0	5	6
ENST00000581987.1|ENSG00000263720.1|OTTHUMG00000178494.1|OTTHUMT00000442210.1|RP11-389J22.1-001|RP11-389J22.1|792|	ENSMUST00000192257.1|ENSMUSG00000102160.1|OTTMUSG00000048851.1|OTTMUST00000124948.1|Gm36944-001|Gm36944|2759|	792	2759	0.180199	4.31e-05	0	0	0	0	0	1	1	1	0	0	0	2	2	5
ENST00000608095.1|ENSG00000272807.1|OTTHUMG00000186312.1|OTTHUMT00000472845.1|RP11-260M2.1-001|RP11-260M2.1|740|	ENSMUST00000195880.1|ENSMUSG00000103382.1|OTTMUSG00000047113.1|OTTMUST00000121925.1|Gm37755-001|Gm37755|2179|	740	2179	0.180146	4.33e-05	0	0	0	0	0	0	0	0	0	0	0	0	0	0
ENST00000622924.2|ENSG00000280407.2|OTTHUMG00000178833.1|-|RP13-516M14.8-201|RP13-516M14.8|2756|	ENSMUST00000151998.1|ENSMUSG00000053613.6|OTTMUSG00000004079.1|OTTMUST00000009152.1|Notumos-001|Notumos|2659|	2756	2659	0.180089	4.35e-05	0	0	3	2	1	0	6	2	0	3	1	0	0	6
ENST00000584986.1|ENSG00000264647.1|OTTHUMG00000179725.1|OTTHUMT00000447828.1|RP11-68I3.7-001|RP11-68I3.7|278|	ENSMUST00000180805.1|ENSMUSG00000097165.1|-|-|2210008F06Rik-201|2210008F06Rik|1082|	278	1082	0.179489	4.56e-05	0	0	0	0	0	0	0	0	0	1	1	0	0	2
ENST00000436880.2|ENSG00000229989.3|OTTHUMG00000035888.2|OTTHUMT00000087436.2|MIR181A1HG-003|MIR181A1HG|2308|	ENSMUST00000194483.1|ENSMUSG00000103427.1|OTTMUSG00000043197.1|OTTMUST00000113291.1|Gm37534-001|Gm37534|5222|	2308	5222	0.179245	4.65e-05	0	0	0	0	0	0	0	0	0	0	0	0	2	2
ENST00000603037.1|ENSG00000271430.1|OTTHUMG00000184204.1|OTTHUMT00000468301.1|RP3-368A4.5-001|RP3-368A4.5|3897|	ENSMUST00000193066.1|ENSMUSG00000103697.1|OTTMUSG00000043539.1|OTTMUST00000114224.1|Gm38020-001|Gm38020|4676|	3897	4676	0.179206	4.67e-05	2	1	1	1	0	3	8	1	0	0	0	0	3	4
ENST00000504922.5|ENSG00000247828.7|OTTHUMG00000162704.4|OTTHUMT00000370144.1|TMEM161B-AS1-004|TMEM161B-AS1|585|	ENSMUST00000182477.1|ENSMUSG00000098087.1|OTTMUSG00000043070.1|OTTMUST00000113027.1|Gm17750-001|Gm17750|529|	585	529	0.179123	4.7e-05	0	0	0	0	0	0	0	0	0	0	0	0	0	0
ENST00000624389.1|ENSG00000279086.1|OTTHUMG00000158457.1|OTTHUMT00000351094.1|RP11-667F14.1-001|RP11-667F14.1|2278|	ENSMUST00000140709.1|ENSMUSG00000054556.6|OTTMUSG00000022496.2|OTTMUST00000058465.1|Gm4876-005|Gm4876|402|	2278	402	0.178738	4.85e-05	0	0	1	2	0	0	3	0	0	0	1	0	0	1
ENST00000557568.1|ENSG00000157306.14|OTTHUMG00000187908.1|OTTHUMT00000413829.1|RP11-66N24.4-005|RP11-66N24.4|423|	ENSMUST00000176872.2|ENSMUSG00000100162.1|OTTMUSG00000049452.1|OTTMUST00000126071.1|Gm20687-001|Gm20687|1249|	423	1249	0.178725	4.85e-05	0	0	0	0	0	0	0	0	0	1	1	0	0	2
ENST00000576234.1|ENSG00000261924.1|OTTHUMG00000177644.1|OTTHUMT00000438212.1|CTD-2561B21.5-001|CTD-2561B21.5|3133|	ENSMUST00000155681.1|ENSMUSG00000075389.3|OTTMUSG00000004109.1|OTTMUST00000009280.1|2810410L24Rik-001|2810410L24Rik|2615|	3133	2615	0.17807	5.11e-05	0	0	3	1	0	0	4	2	0	4	4	0	0	10
ENST00000417299.1|ENSG00000224961.1|OTTHUMG00000031876.1|OTTHUMT00000078007.1|RP1-278O22.1-001|RP1-278O22.1|438|	ENSMUST00000185663.1|ENSMUSG00000099683.1|OTTMUSG00000047541.1|OTTMUST00000122646.1|Gm28214-001|Gm28214|420|	438	420	0.178043	5.13e-05	0	0	0	0	0	0	0	0	0	0	0	0	0	0
ENST00000537827.2|ENSG00000256152.2|OTTHUMG00000168766.2|OTTHUMT00000400945.2|RP11-463O12.3-001|RP11-463O12.3|484|	ENSMUST00000192309.1|ENSMUSG00000102725.2|OTTMUSG00000047760.1|OTTMUST00000122983.1|Gm37939-002|Gm37939|447|	484	447	0.177115	5.52e-05	0	0	0	0	0	0	0	0	0	0	0	0	0	0
ENST00000607148.1|ENSG00000272477.1|OTTHUMG00000185577.1|OTTHUMT00000470762.1|RP11-158G18.1-001|RP11-158G18.1|956|	ENSMUST00000193576.1|ENSMUSG00000103216.1|OTTMUSG00000046434.1|OTTMUST00000120919.1|Gm37248-001|Gm37248|3174|	956	3174	0.176503	5.8e-05	1	0	0	0	0	1	2	2	0	0	0	0	2	4
ENST00000515504.1|ENSG00000249588.1|OTTHUMG00000162331.1|OTTHUMT00000368580.1|CTC-537E7.1-001|CTC-537E7.1|587|	ENSMUST00000192941.1|ENSMUSG00000103437.1|OTTMUSG00000047347.1|OTTMUST00000122355.1|Gm36994-001|Gm36994|492|	587	492	0.176225	5.93e-05	0	0	0	0	0	0	0	0	0	0	0	0	0	0
ENST00000438287.5|ENSG00000230725.5|OTTHUMG00000032113.1|OTTHUMT00000078389.1|RP4-738P15.1-001|RP4-738P15.1|468|	ENSMUST00000187349.1|ENSMUSG00000100630.1|OTTMUSG00000049584.1|OTTMUST00000122654.1|Gm28450-001|Gm28450|638|	468	638	0.175771	6.14e-05	0	0	0	0	0	0	0	0	0	0	0	0	0	0
ENST00000624188.1|ENSG00000279050.1|OTTHUMG00000176879.1|OTTHUMT00000434200.1|PWAR1-001|PWAR1|2414|	ENSMUST00000190666.1|ENSMUSG00000100826.6|OTTMUSG00000046294.3|OTTMUST00000120687.1|Snhg14-003|Snhg14|3708|	2414	3708	0.175342	6.36e-05	0	0	0	0	0	0	0	1	0	0	0	0	2	3
ENST00000517635.2|ENSG00000253552.7|OTTHUMG00000063274.5|OTTHUMT00000082076.4|HOXA-AS2-006|HOXA-AS2|2455|	ENSMUST00000156515.8|ENSMUSG00000086427.8|OTTMUSG00000018876.2|OTTMUST00000045405.2|Hoxa11os-006|Hoxa11os|2118|	2455	2118	0.174002	7.07e-05	2	0	0	0	0	0	2	0	0	2	0	1	0	3
ENST00000458725.5|ENSG00000231607.9|OTTHUMG00000016927.5|OTTHUMT00000044961.2|DLEU2-008|DLEU2|1657|	ENSMUST00000182325.7|ENSMUSG00000097589.9|OTTMUSG00000043240.1|OTTMUST00000113485.1|Dleu2-006|Dleu2|463|	1657	463	0.173443	7.38e-05	1	0	0	0	0	0	1	0	0	0	0	0	0	0
ENST00000436600.2|ENSG00000234215.2|OTTHUMG00000156644.2|OTTHUMT00000345016.2|RP5-942I16.1-001|RP5-942I16.1|691|	ENSMUST00000187344.1|ENSMUSG00000100420.1|OTTMUSG00000047776.1|OTTMUST00000123010.1|Gm28616-001|Gm28616|441|	691	441	0.17319	7.53e-05	0	0	0	1	0	0	1	0	0	0	0	0	0	0
ENST00000618151.1|ENSG00000274270.1|OTTHUMG00000187356.1|OTTHUMT00000474805.1|RP11-34F20.7-001|RP11-34F20.7|2648|	ENSMUST00000194021.1|ENSMUSG00000104187.1|OTTMUSG00000043247.1|OTTMUST00000113502.1|Gm37820-001|Gm37820|2147|	2648	2147	0.172699	7.83e-05	1	1	4	2	0	0	8	0	0	4	0	0	1	5
ENST00000513055.1|ENSG00000237187.8|OTTHUMG00000162643.3|OTTHUMT00000369863.1|NR2F1-AS1-001|NR2F1-AS1|645|	ENSMUST00000145613.7|ENSMUSG00000087143.9|OTTMUSG00000033124.2|OTTMUST00000082812.1|A830082K12Rik-001|A830082K12Rik|1474|	645	1474	0.172177	8.16e-05	0	0	0	1	0	0	1	0	0	0	0	0	0	0
ENST00000608502.2|ENSG00000207955.4|OTTHUMG00000185897.2|OTTHUMT00000471662.2|MIR219A2-001|MIR219A2|1504|	ENSMUST00000047607.2|ENSMUSG00000039798.2|OTTMUSG00000012689.2|OTTMUST00000030250.2|2600006K01Rik-001|2600006K01Rik|1406|	1504	1406	0.172082	8.22e-05	1	0	2	3	0	0	6	0	0	0	1	0	0	1
ENST00000585408.1|ENSG00000267282.1|OTTHUMG00000180840.1|OTTHUMT00000453236.1|CTB-129P6.4-001|CTB-129P6.4|426|	ENSMUST00000172483.1|ENSMUSG00000092381.1|OTTMUSG00000038242.1|OTTMUST00000098472.1|Gm20512-001|Gm20512|618|	426	618	0.172038	8.25e-05	0	0	0	0	0	0	0	0	0	0	1	0	0	1
ENST00000602507.1|ENSG00000270069.1|OTTHUMG00000184015.3|OTTHUMT00000467765.2|MIR222HG-001|MIR222HG|1758|	ENSMUST00000143129.1|ENSMUSG00000073274.4|OTTMUSG00000017540.1|OTTMUST00000042628.1|Gm14636-002|Gm14636|2279|	1758	2279	0.171638	8.51e-05	0	0	0	0	0	0	0	0	0	0	0	0	1	1
ENST00000560743.1|ENSG00000259450.1|OTTHUMG00000172465.1|OTTHUMT00000418671.1|RP11-265N7.1-001|RP11-265N7.1|1961|	ENSMUST00000191321.1|ENSMUSG00000101394.1|OTTMUSG00000045884.1|OTTMUST00000119884.1|Gm28183-001|Gm28183|1406|	1961	1406	0.171484	8.61e-05	0	0	0	0	0	1	1	0	0	0	0	0	0	0
ENST00000414198.5|ENSG00000228956.8|OTTHUMG00000155346.8|OTTHUMT00000339550.1|SATB1-AS1-001|SATB1-AS1|737|	ENSMUST00000194780.1|ENSMUSG00000103753.1|OTTMUSG00000043139.1|OTTMUST00000113199.1|Gm6934-001|Gm6934|1905|	737	1905	0.171126	8.86e-05	1	0	1	1	0	0	3	1	0	4	1	0	0	6
ENST00000453677.1|ENSG00000239569.3|OTTHUMG00000157280.1|OTTHUMT00000348305.1|KMT2E-AS1-001|KMT2E-AS1|736|	ENSMUST00000101522.2|ENSMUSG00000073147.3|OTTMUSG00000046009.1|-|5031425E22Rik-201|5031425E22Rik|2110|	736	2110	0.170905	9.01e-05	1	0	2	1	0	0	4	0	1	0	0	0	1	2
ENST00000419080.1|ENSG00000226416.1|OTTHUMG00000012474.2|OTTHUMT00000034755.2|MRPL23-AS1-001|MRPL23-AS1|1876|	ENSMUST00000054910.8|ENSMUSG00000043795.9|OTTMUSG00000016823.2|OTTMUST00000040867.1|Prr33-001|Prr33|2251|	1876	2251	0.169988	9.68e-05	0	0	2	3	0	0	5	0	0	3	2	0	0	5
ENST00000509456.1|ENSG00000249423.1|OTTHUMG00000162992.1|OTTHUMT00000371293.1|RP11-284A20.1-001|RP11-284A20.1|204|	ENSMUST00000195736.1|ENSMUSG00000104521.1|OTTMUSG00000047851.1|OTTMUST00000123113.1|Gm34073-001|Gm34073|212|	204	212	0.169437	0.000101008	0	0	0	0	0	0	0	0	0	0	0	0	0	0
ENST00000625110.1|ENSG00000280351.2|OTTHUMG00000177659.1|OTTHUMT00000438276.1|CTD-2561B21.8-001|CTD-2561B21.8|1798|	ENSMUST00000135630.1|ENSMUSG00000087675.1|OTTMUSG00000004029.1|OTTMUST00000008965.1|Gm11762-001|Gm11762|1705|	1798	1705	0.169137	0.000103387	1	0	3	3	0	0	7	1	0	2	3	0	0	6
ENST00000425264.1|ENSG00000225936.1|OTTHUMG00000019119.1|OTTHUMT00000050561.1|RP11-501J20.5-001|RP11-501J20.5|744|	ENSMUST00000188535.1|ENSMUSG00000101630.1|OTTMUSG00000045744.1|OTTMUST00000119668.1|Gm29261-001|Gm29261|678|	744	678	0.168673	0.000107176	0	0	1	0	0	0	1	0	0	1	0	0	0	1
ENST00000553478.1|ENSG00000257060.6|OTTHUMG00000171785.3|OTTHUMT00000415159.1|RP11-266O8.1-005|RP11-266O8.1|578|	ENSMUST00000187453.1|ENSMUSG00000101843.1|OTTMUSG00000047452.1|OTTMUST00000122506.1|Gm28746-001|Gm28746|380|	578	380	0.168482	0.000108772	0	0	0	0	0	0	0	0	0	0	0	0	0	0
ENST00000441587.2|ENSG00000230002.2|OTTHUMG00000152785.2|OTTHUMT00000327862.2|ALMS1-IT1-001|ALMS1-IT1|2107|	ENSMUST00000201862.1|ENSMUSG00000107370.1|OTTMUSG00000055995.1|OTTMUST00000138493.1|Gm43588-001|Gm43588|2298|	2107	2298	0.167728	0.000115302	1	0	0	0	0	2	3	2	1	0	0	0	4	7
ENST00000598623.1|ENSG00000269707.1|OTTHUMG00000182993.1|OTTHUMT00000464592.1|RP11-13J10.1-001|RP11-13J10.1|443|	ENSMUST00000176807.2|ENSMUSG00000093436.6|OTTMUSG00000039882.3|OTTMUST00000103643.2|Gm20646-001|Gm20646|1316|	443	1316	0.167113	0.000120905	0	0	1	0	0	0	1	0	0	0	0	0	0	0
ENST00000437095.1|ENSG00000237087.1|OTTHUMG00000153335.1|OTTHUMT00000330785.1|AC068134.6-001|AC068134.6|576|	ENSMUST00000138844.2|ENSMUSG00000089821.1|OTTMUSG00000029544.2|OTTMUST00000073233.2|Efhd1os-001|Efhd1os|332|	576	332	0.1666	0.000125783	0	0	1	1	0	0	2	0	0	0	0	0	0	0
ENST00000624863.1|ENSG00000279377.1|OTTHUMG00000182914.1|OTTHUMT00000464306.1|AC003973.3-001|AC003973.3|2822|	ENSMUST00000165145.2|ENSMUSG00000092103.2|OTTMUSG00000036832.4|OTTMUST00000094594.2|Gm17039-001|Gm17039|4901|	2822	4901	0.1659	0.000132726	1	0	0	0	0	1	2	2	0	0	0	0	0	2
ENST00000321399.7|ENSG00000177133.10|OTTHUMG00000000563.3|OTTHUMT00000001332.1|LINC00982-001|LINC00982|2226|	ENSMUST00000136217.2|ENSMUSG00000085069.2|OTTMUSG00000010446.2|OTTMUST00000024317.2|Gm13111-001|Gm13111|3542|	2226	3542	0.165599	0.000135832	0	0	3	3	0	0	6	0	0	2	1	0	0	3
ENST00000634619.1|ENSG00000233593.8|OTTHUMG00000010018.3|OTTHUMT00000488754.1|RP4-665J23.1-006|RP4-665J23.1|1131|	ENSMUST00000149128.2|ENSMUSG00000098302.1|OTTMUSG00000044448.1|OTTMUST00000117054.1|Gm28039-001|Gm28039|254|	1131	254	0.164751	0.000144937	0	0	0	1	0	0	1	0	0	0	0	0	0	0
ENST00000519050.1|ENSG00000253405.1|OTTHUMG00000159991.1|OTTHUMT00000358748.1|EVX1-AS-003|EVX1-AS|576|	ENSMUST00000125305.1|ENSMUSG00000086126.1|OTTMUSG00000018887.1|OTTMUST00000045424.1|Evx1os-001|Evx1os|2916|	576	2916	0.164431	0.000148519	0	0	0	0	0	0	0	0	0	3	2	0	0	5
ENST00000624641.1|ENSG00000279069.1|OTTHUMG00000178782.1|OTTHUMT00000443337.1|RP11-159D12.6-001|RP11-159D12.6|1514|	ENSMUST00000129337.1|ENSMUSG00000086193.1|OTTMUSG00000001477.1|OTTMUST00000002917.1|Gm11508-001|Gm11508|440|	1514	440	0.164216	0.000150981	1	0	2	2	0	1	6	0	0	0	0	0	0	0
ENST00000560552.1|ENSG00000259269.1|OTTHUMG00000172480.1|OTTHUMT00000418732.1|RP11-624L4.2-001|RP11-624L4.2|579|	ENSMUST00000193616.1|ENSMUSG00000103266.1|OTTMUSG00000047538.2|OTTMUST00000122643.2|Gm36979-001|Gm36979|539|	579	539	0.163393	0.000160737	0	0	1	0	0	0	1	0	0	0	0	0	0	0
ENST00000467187.1|ENSG00000242797.3|OTTHUMG00000158379.1|OTTHUMT00000350826.1|GLYCTK-AS1-003|GLYCTK-AS1|643|	ENSMUST00000150953.1|ENSMUSG00000086296.2|OTTMUSG00000034700.1|OTTMUST00000088121.1|D030055H07Rik-002|D030055H07Rik|4325|	643	4325	0.163361	0.000161133	0	0	1	1	0	1	3	0	0	0	2	0	0	2
ENST00000535301.1|ENSG00000241388.4|OTTHUMG00000185474.2|OTTHUMT00000402493.1|HNF1A-AS1-005|HNF1A-AS1|536|	ENSMUST00000129609.1|ENSMUSG00000086054.2|OTTMUSG00000014613.2|OTTMUST00000034669.1|Hnf1aos1-003|Hnf1aos1|516|	536	516	0.163306	0.00016181	0	0	2	1	0	1	4	0	0	1	1	1	1	4
ENST00000457356.8|ENSG00000235531.9|OTTHUMG00000164497.3|OTTHUMT00000378997.1|MSC-AS1-003|MSC-AS1|4220|	ENSMUST00000194866.1|ENSMUSG00000103492.1|OTTMUSG00000049206.1|OTTMUST00000125544.1|Gm37412-001|Gm37412|4321|	4220	4321	0.162285	0.000174837	0	0	1	0	0	1	2	0	0	0	0	0	1	1
ENST00000606154.1|ENSG00000271811.1|OTTHUMG00000185301.1|OTTHUMT00000470123.1|RP1-79C4.4-001|RP1-79C4.4|2045|	ENSMUST00000192190.1|ENSMUSG00000103195.1|OTTMUSG00000046023.1|OTTMUST00000120200.1|Gm37644-001|Gm37644|2270|	2045	2270	0.162216	0.000175757	0	0	3	1	0	0	4	0	0	0	0	0	1	1
ENST00000553732.1|ENSG00000258876.1|OTTHUMG00000171614.1|OTTHUMT00000414480.1|RP11-270M14.5-001|RP11-270M14.5|580|	ENSMUST00000192206.1|ENSMUSG00000103301.1|OTTMUSG00000047416.1|OTTMUST00000122459.1|Gm37804-001|Gm37804|547|	580	547	0.162215	0.000175776	0	0	0	0	0	0	0	0	0	0	0	0	0	0
ENST00000517550.1|ENSG00000253552.7|OTTHUMG00000063274.5|OTTHUMT00000137336.3|HOXA-AS2-001|HOXA-AS2|2022|	ENSMUST00000191326.1|ENSMUSG00000101451.1|OTTMUSG00000045771.1|OTTMUST00000119698.1|Gm29430-002|Gm29430|759|	2022	759	0.162154	0.000176587	0	0	2	1	0	1	4	0	0	0	0	0	0	0
ENST00000435429.2|ENSG00000224532.2|OTTHUMG00000014193.2|OTTHUMT00000039765.2|RP3-470L22.1-001|RP3-470L22.1|506|	ENSMUST00000194212.1|ENSMUSG00000102924.1|OTTMUSG00000047414.1|OTTMUST00000122447.1|Gm37149-001|Gm37149|341|	506	341	0.161941	0.00017945	0	0	0	1	0	0	1	0	0	0	0	0	0	0
ENST00000509711.1|ENSG00000248317.1|OTTHUMG00000160654.2|OTTHUMT00000361582.2|RP11-463H12.2-001|RP11-463H12.2|422|	ENSMUST00000192381.1|ENSMUSG00000103684.1|OTTMUSG00000047725.1|OTTMUST00000122939.1|Gm38180-001|Gm38180|395|	422	395	0.16185	0.000180695	0	0	0	0	0	0	0	0	0	1	0	0	0	1
ENST00000470523.2|ENSG00000244706.2|OTTHUMG00000158500.2|OTTHUMT00000351180.1|RP11-298O21.3-001|RP11-298O21.3|558|	ENSMUST00000193087.1|ENSMUSG00000102188.1|OTTMUSG00000047601.1|OTTMUST00000122740.1|Gm37193-001|Gm37193|513|	558	513	0.161823	0.000181065	0	0	0	0	0	0	0	1	0	0	0	0	1	2
ENST00000473572.2|ENSG00000248101.2|OTTHUMG00000181895.1|OTTHUMT00000458193.1|AC002116.8-001|AC002116.8|1130|	ENSMUST00000124276.1|ENSMUSG00000062132.9|OTTMUSG00000033749.1|OTTMUST00000085048.1|Arhgap33os-001|Arhgap33os|2648|	1130	2648	0.161537	0.000185013	1	0	2	3	0	0	6	0	0	3	3	0	0	6
ENST00000626518.2|ENSG00000280953.2|OTTHUMG00000189527.1|OTTHUMT00000479895.1|LINC01163-002|LINC01163|533|	ENSMUST00000211371.1|ENSMUSG00000109898.1|OTTMUSG00000060279.2|OTTMUST00000147541.2|RP24-371E20.2-001|RP24-371E20.2|1316|	533	1316	0.161402	0.000186918	0	0	0	0	0	0	0	1	0	0	0	0	1	2
ENST00000602385.1|ENSG00000270141.3|OTTHUMG00000184024.1|OTTHUMT00000467796.1|TERC-001|TERC|541|	ENSMUST00000187361.2|ENSMUSG00000097786.3|OTTMUSG00000046328.2|OTTMUST00000120763.2|4933429H19Rik-001|4933429H19Rik|995|	541	995	0.161349	0.000187664	1	0	1	1	0	0	3	0	0	1	2	0	0	3
ENST00000635423.1|ENSG00000283010.1|OTTHUMG00000191489.1|OTTHUMT00000488081.1|RP1-273N12.4-001|RP1-273N12.4|993|	ENSMUST00000203909.1|ENSMUSG00000107859.1|OTTMUSG00000056758.1|OTTMUST00000140051.1|Gm30731-001|Gm30731|825|	993	825	0.161245	0.00018915	0	0	1	0	0	0	1	0	0	0	0	0	0	0
ENST00000438755.1|ENSG00000197308.9|OTTHUMG00000156966.1|OTTHUMT00000346866.1|GATA3-AS1-003|GATA3-AS1|675|	ENSMUST00000194765.1|ENSMUSG00000103570.1|OTTMUSG00000046253.1|OTTMUST00000120592.1|C630004M23Rik-001|C630004M23Rik|1682|	675	1682	0.16067	0.000197522	0	0	0	0	0	0	0	0	0	2	3	0	0	5
ENST00000535301.1|ENSG00000241388.4|OTTHUMG00000185474.2|OTTHUMT00000402493.1|HNF1A-AS1-005|HNF1A-AS1|536|	ENSMUST00000138108.1|ENSMUSG00000086140.1|OTTMUSG00000014618.1|OTTMUST00000034670.1|Hnf1aos2-001|Hnf1aos2|442|	536	442	0.160577	0.000198908	0	0	2	1	0	1	4	0	0	1	1	1	0	3
ENST00000527135.1|ENSG00000255427.1|OTTHUMG00000166453.1|OTTHUMT00000389850.1|RP11-350D17.2-001|RP11-350D17.2|564|	ENSMUST00000195179.1|ENSMUSG00000102686.1|OTTMUSG00000047534.1|OTTMUST00000122639.1|Gm37220-001|Gm37220|415|	564	415	0.160551	0.000199303	0	0	0	0	0	1	1	0	0	0	0	0	1	1
ENST00000527828.5|ENSG00000255300.5|OTTHUMG00000166487.1|OTTHUMT00000389990.1|RP11-148I19.1-001|RP11-148I19.1|584|	ENSMUST00000192023.1|ENSMUSG00000104258.1|OTTMUSG00000047531.1|OTTMUST00000122634.1|Gm37175-001|Gm37175|587|	584	587	0.160537	0.000199505	0	0	0	0	0	0	0	0	0	1	0	0	0	1
ENST00000612170.1|ENSG00000275549.1|OTTHUMG00000187409.1|OTTHUMT00000474912.1|C9orf173-AS1-001|C9orf173-AS1|1701|	ENSMUST00000129723.1|ENSMUSG00000085830.1|OTTMUSG00000011935.1|OTTMUST00000028198.1|Grin1os-001|Grin1os|2891|	1701	2891	0.16049	0.00020022	0	0	1	0	0	0	1	0	0	3	3	2	0	8
ENST00000573167.2|ENSG00000226137.5|OTTHUMG00000177697.3|OTTHUMT00000438545.2|BAIAP2-AS1-002|BAIAP2-AS1|4014|	ENSMUST00000155681.1|ENSMUSG00000075389.3|OTTMUSG00000004109.1|OTTMUST00000009280.1|2810410L24Rik-001|2810410L24Rik|2615|	4014	2615	0.160313	0.000202895	0	1	1	1	0	0	3	2	0	4	4	0	0	10
ENST00000399413.3|ENSG00000214999.3|OTTHUMG00000132872.1|OTTHUMT00000256356.1|AC129492.6-001|AC129492.6|1804|	ENSMUST00000101007.2|ENSMUSG00000072809.2|OTTMUSG00000047090.1|OTTMUST00000121887.1|9330160F10Rik-001|9330160F10Rik|2766|	1804	2766	0.160146	0.000205462	0	0	2	1	0	0	3	1	0	2	1	0	2	6
ENST00000619222.4|ENSG00000215386.11|OTTHUMG00000074377.4|OTTHUMT00000158029.3|MIR99AHG-001|MIR99AHG|3476|	ENSMUST00000193537.1|ENSMUSG00000102854.1|OTTMUSG00000043481.1|OTTMUST00000114016.1|C130023A14Rik-001|C130023A14Rik|3087|	3476	3087	0.159838	0.000210269	1	0	0	0	0	1	2	1	0	0	0	0	2	3
ENST00000555968.1|ENSG00000258727.1|OTTHUMG00000171522.1|OTTHUMT00000413878.1|RP11-66N24.3-001|RP11-66N24.3|3243|	ENSMUST00000176872.2|ENSMUSG00000100162.1|OTTMUSG00000049452.1|OTTMUST00000126071.1|Gm20687-001|Gm20687|1249|	3243	1249	0.159362	0.000217909	1	0	1	1	0	0	3	0	0	1	1	0	0	2
ENST00000571724.3|ENSG00000262877.4|OTTHUMG00000177951.4|OTTHUMT00000439901.3|RP11-1055B8.4-001|RP11-1055B8.4|1565|	ENSMUST00000155681.1|ENSMUSG00000075389.3|OTTMUSG00000004109.1|OTTMUST00000009280.1|2810410L24Rik-001|2810410L24Rik|2615|	1565	2615	0.15913	0.000221731	0	1	2	3	0	0	6	2	0	4	4	0	0	10
ENST00000450854.1|ENSG00000227292.1|OTTHUMG00000152269.2|OTTHUMT00000325655.2|AC009229.5-001|AC009229.5|622|	ENSMUST00000195711.1|ENSMUSG00000103091.1|OTTMUSG00000047825.1|OTTMUST00000123081.1|Gm37555-001|Gm37555|542|	622	542	0.158778	0.000227643	0	0	0	0	0	0	0	0	0	0	0	0	0	0
ENST00000440762.5|ENSG00000233973.6|OTTHUMG00000009566.2|OTTHUMT00000026413.1|LINC01360-001|LINC01360|3871|	ENSMUST00000198230.1|ENSMUSG00000104826.1|OTTMUSG00000052335.1|OTTMUST00000131372.1|Gm42947-001|Gm42947|675|	3871	675	0.15874	0.0002283	1	0	0	0	0	2	3	0	0	0	0	0	1	1
ENST00000539116.1|ENSG00000256268.1|OTTHUMG00000168899.1|OTTHUMT00000401554.1|RP11-221N13.3-002|RP11-221N13.3|589|	ENSMUST00000194273.1|ENSMUSG00000103213.1|OTTMUSG00000047443.1|OTTMUST00000122493.1|Gm38289-001|Gm38289|597|	589	597	0.157979	0.000241632	0	0	0	0	0	0	0	1	0	0	0	0	1	2
ENST00000517595.1|ENSG00000254350.1|OTTHUMG00000163518.1|OTTHUMT00000373933.1|RP11-542A14.1-001|RP11-542A14.1|706|	ENSMUST00000195753.1|ENSMUSG00000104099.1|OTTMUSG00000047429.1|OTTMUST00000122472.1|Gm37312-001|Gm37312|685|	706	685	0.157517	0.000250096	0	0	0	0	0	0	0	0	0	0	0	0	0	0
ENST00000512965.1|ENSG00000249365.1|OTTHUMG00000163010.1|OTTHUMT00000371327.1|RP11-508M8.1-001|RP11-508M8.1|451|	ENSMUST00000192496.1|ENSMUSG00000104455.1|OTTMUSG00000047852.1|OTTMUST00000123114.1|Gm37828-001|Gm37828|432|	451	432	0.157439	0.000251557	0	0	0	0	0	0	0	0	0	0	0	0	1	1
ENST00000509718.1|ENSG00000251132.1|OTTHUMG00000163155.1|OTTHUMT00000371859.1|RP11-438C19.2-001|RP11-438C19.2|622|	ENSMUST00000193986.1|ENSMUSG00000104009.1|OTTMUSG00000047849.1|OTTMUST00000123111.1|Gm38337-001|Gm38337|599|	622	599	0.157422	0.000251865	0	1	0	0	0	1	2	0	1	0	1	0	0	2
ENST00000518128.5|ENSG00000253706.5|OTTHUMG00000164543.1|OTTHUMT00000379168.1|RP11-758M4.4-001|RP11-758M4.4|2810|	ENSMUST00000127328.1|ENSMUSG00000085125.7|OTTMUSG00000029756.3|OTTMUST00000073850.1|Gm16070-003|Gm16070|5210|	2810	5210	0.156734	0.000265076	0	0	0	0	0	1	1	1	0	1	1	0	1	4
ENST00000497017.1|ENSG00000239715.1|OTTHUMG00000151402.1|OTTHUMT00000322479.1|AC093627.11-001|AC093627.11|568|	ENSMUST00000193602.1|ENSMUSG00000103298.1|OTTMUSG00000047795.1|OTTMUST00000123041.1|Gm38232-001|Gm38232|411|	568	411	0.156516	0.00026941	1	0	0	0	0	1	2	0	0	0	0	0	0	0
ENST00000449673.1|ENSG00000225815.2|OTTHUMG00000152908.1|OTTHUMT00000328529.1|AC092669.6-002|AC092669.6|905|	ENSMUST00000193150.1|ENSMUSG00000102585.1|OTTMUSG00000047433.1|OTTMUST00000122481.1|Gm37439-001|Gm37439|856|	905	856	0.156443	0.00027086	0	0	0	0	0	0	0	0	0	0	0	0	0	0
ENST00000624417.1|ENSG00000279692.1|OTTHUMG00000176097.1|OTTHUMT00000431502.1|RP11-1055B8.1-001|RP11-1055B8.1|1536|	ENSMUST00000142520.1|ENSMUSG00000086929.1|OTTMUSG00000004271.1|OTTMUST00000009683.1|Gm11788-001|Gm11788|562|	1536	562	0.156387	0.000271998	1	0	1	3	0	0	5	0	0	2	2	0	0	4
ENST00000560415.1|ENSG00000259330.1|OTTHUMG00000172415.1|OTTHUMT00000418443.1|INAFM2-001|INAFM2|594|	ENSMUST00000149978.1|ENSMUSG00000074918.4|OTTMUSG00000015633.1|OTTMUST00000037143.1|Inafm2-001|Inafm2|3053|	594	3053	0.156094	0.000277951	1	0	0	0	0	0	1	4	1	4	3	0	1	13
ENST00000514823.5|ENSG00000249464.5|OTTHUMG00000161162.3|OTTHUMT00000364006.1|LINC01091-001|LINC01091|5262|	ENSMUST00000199414.1|ENSMUSG00000106062.1|OTTMUSG00000052828.1|OTTMUST00000132209.1|Gm43820-001|Gm43820|3346|	5262	3346	0.156086	0.000278119	5	0	1	0	0	4	10	2	0	0	0	0	1	3
ENST00000432922.5|ENSG00000224592.5|OTTHUMG00000000478.1|OTTHUMT00000001201.1|RP5-884C9.2-002|RP5-884C9.2|593|	ENSMUST00000184062.1|ENSMUSG00000098760.1|OTTMUSG00000044461.1|OTTMUST00000117079.1|Gm27247-001|Gm27247|424|	593	424	0.155804	0.000283979	1	0	1	1	0	0	3	0	0	0	0	0	0	0
ENST00000417975.1|ENSG00000233008.5|OTTHUMG00000009930.1|OTTHUMT00000027492.1|RP11-475O6.1-001|RP11-475O6.1|3177|	ENSMUST00000195873.1|ENSMUSG00000102569.1|OTTMUSG00000051022.1|OTTMUST00000129353.1|Gm37041-001|Gm37041|3853|	3177	3853	0.155785	0.000284393	1	0	0	0	0	0	1	1	0	0	0	0	0	1
ENST00000435287.1|ENSG00000227220.1|OTTHUMG00000150056.1|OTTHUMT00000316064.1|RP11-69I8.3-001|RP11-69I8.3|495|	ENSMUST00000125158.1|ENSMUSG00000087400.8|OTTMUSG00000019710.1|OTTMUST00000047197.1|Gm15270-005|Gm15270|870|	495	870	0.155583	0.000288652	0	0	0	0	0	0	0	0	0	0	0	0	0	0
ENST00000501718.2|ENSG00000247011.2|OTTHUMG00000162317.1|OTTHUMT00000368558.1|RP11-700H6.1-001|RP11-700H6.1|2054|	ENSMUST00000125406.1|ENSMUSG00000086003.7|OTTMUSG00000001644.2|OTTMUST00000003238.2|B230206L02Rik-002|B230206L02Rik|524|	2054	524	0.155444	0.000291633	0	0	1	1	1	1	4	0	0	1	1	0	0	2
ENST00000609837.1|ENSG00000273106.1|OTTHUMG00000185892.1|OTTHUMT00000471654.1|RP11-559M23.1-001|RP11-559M23.1|1235|	ENSMUST00000181147.1|ENSMUSG00000097047.1|-|-|1110020A21Rik-201|1110020A21Rik|853|	1235	853	0.155138	0.000298306	0	0	2	3	1	0	6	0	0	1	1	0	0	2
ENST00000455038.1|ENSG00000203605.3|OTTHUMG00000009144.1|OTTHUMT00000025342.1|RP11-335E6.2-001|RP11-335E6.2|823|	ENSMUST00000194238.1|ENSMUSG00000103575.1|OTTMUSG00000047724.1|OTTMUST00000122938.1|Gm37117-001|Gm37117|589|	823	589	0.155107	0.000298975	0	0	0	0	0	0	0	0	0	1	0	0	0	1
ENST00000558424.1|ENSG00000259422.1|OTTHUMG00000172584.1|OTTHUMT00000419300.1|RP11-593F23.1-001|RP11-593F23.1|2354|	ENSMUST00000181927.1|ENSMUSG00000097870.1|-|-|Gm26868-201|Gm26868|2653|	2354	2653	0.15502	0.000300898	0	0	1	0	1	0	2	0	0	0	0	0	0	0
ENST00000624299.1|ENSG00000279645.1|OTTHUMG00000177232.1|OTTHUMT00000435940.1|RP11-759A24.1-001|RP11-759A24.1|4198|	ENSMUST00000190320.1|ENSMUSG00000100005.7|OTTMUSG00000046219.3|OTTMUST00000120527.1|B130024G19Rik-002|B130024G19Rik|5451|	4198	5451	0.155006	0.000301219	1	0	0	1	1	2	5	1	1	2	1	1	3	9
ENST00000508564.1|ENSG00000250742.2|OTTHUMG00000160035.2|OTTHUMT00000358962.1|RP11-834C11.4-001|RP11-834C11.4|1369|	ENSMUST00000186379.1|ENSMUSG00000099758.1|OTTMUSG00000048331.1|OTTMUST00000123961.1|Gm10830-001|Gm10830|636|	1369	636	0.154478	0.000313155	0	0	1	1	0	0	2	0	0	2	0	0	0	2
ENST00000378340.1|ENSG00000205015.1|OTTHUMG00000175525.1|OTTHUMT00000430369.1|RP11-46C24.3-001|RP11-46C24.3|1326|	ENSMUST00000162198.1|ENSMUSG00000090174.1|OTTMUSG00000027607.1|OTTMUST00000068333.1|Gm10612-001|Gm10612|1681|	1326	1681	0.154224	0.000319066	1	0	3	2	0	0	6	0	0	0	0	0	0	0
ENST00000431043.1|ENSG00000203875.10|OTTHUMG00000015144.5|OTTHUMT00000314639.1|SNHG5-009|SNHG5|998|	ENSMUST00000182872.2|ENSMUSG00000097195.8|OTTMUSG00000043223.3|OTTMUST00000113417.2|Snhg5-007|Snhg5|883|	998	883	0.153854	0.000327844	1	0	0	0	0	0	1	0	0	0	0	0	0	0
ENST00000435419.1|ENSG00000224424.7|OTTHUMG00000156671.2|OTTHUMT00000345243.1|PRKAR2A-AS1-004|PRKAR2A-AS1|843|	ENSMUST00000134690.1|ENSMUSG00000025644.10|OTTMUSG00000021052.1|OTTMUST00000049800.1|Gm7628-001|Gm7628|2010|	843	2010	0.153648	0.000332835	0	0	1	1	0	0	2	2	0	3	4	1	1	11
ENST00000624703.1|ENSG00000278990.1|OTTHUMG00000173004.1|OTTHUMT00000421670.1|RP11-1127D7.2-001|RP11-1127D7.2|900|	ENSMUST00000130564.1|ENSMUSG00000085641.1|OTTMUSG00000019484.1|OTTMUST00000046514.1|4930465M20Rik-001|4930465M20Rik|1446|	900	1446	0.153482	0.000336912	0	0	0	0	0	0	0	0	0	0	0	0	0	0
ENST00000456513.1|ENSG00000228173.1|OTTHUMG00000155841.1|OTTHUMT00000341970.1|AC091770.3-001|AC091770.3|373|	ENSMUST00000195362.1|ENSMUSG00000104137.1|OTTMUSG00000047804.2|OTTMUST00000123054.2|Gm36954-001|Gm36954|363|	373	363	0.153411	0.000338683	0	0	0	0	0	0	0	0	0	0	0	0	0	0
ENST00000609067.1|ENSG00000272849.1|OTTHUMG00000185860.1|OTTHUMT00000471556.1|RP11-347I19.8-001|RP11-347I19.8|572|	ENSMUST00000195992.1|ENSMUSG00000105881.1|OTTMUSG00000043109.2|OTTMUST00000113145.2|4932422M17Rik-001|4932422M17Rik|2639|	572	2639	0.153352	0.000340139	0	0	1	0	0	0	1	0	0	0	2	0	0	2
ENST00000443228.1|ENSG00000232849.1|OTTHUMG00000017201.1|OTTHUMT00000045456.1|LINC00363-001|LINC00363|210|	ENSMUST00000193536.1|ENSMUSG00000104296.1|OTTMUSG00000047329.1|OTTMUST00000122334.1|Gm38045-001|Gm38045|199|	210	199	0.15308	0.000346974	0	0	0	0	0	0	0	0	0	0	0	0	0	0
ENST00000441418.2|ENSG00000237941.2|OTTHUMG00000009942.3|OTTHUMT00000027530.3|KCNQ1DN-001|KCNQ1DN|1093|	ENSMUST00000208055.1|ENSMUSG00000108934.1|OTTMUSG00000060028.1|OTTMUST00000146948.1|Gm44732-001|Gm44732|635|	1093	635	0.152719	0.000356257	0	0	1	2	0	0	3	0	0	1	2	0	0	3
ENST00000623679.1|ENSG00000279518.1|OTTHUMG00000172341.1|OTTHUMT00000418011.1|AC083843.4-001|AC083843.4|2186|	ENSMUST00000192728.1|ENSMUSG00000104116.1|OTTMUSG00000042920.1|OTTMUST00000112739.1|Gm37296-001|Gm37296|2922|	2186	2922	0.152573	0.000360078	0	1	0	0	0	0	1	1	0	0	0	0	1	2
ENST00000511279.1|ENSG00000251517.1|OTTHUMG00000161042.1|OTTHUMT00000363529.1|RP11-109E24.1-001|RP11-109E24.1|1128|	ENSMUST00000202906.1|ENSMUSG00000106897.1|OTTMUSG00000055836.1|OTTMUST00000138179.1|Gm43027-001|Gm43027|3691|	1128	3691	0.152005	0.0003753	1	0	0	0	0	0	1	0	0	0	0	0	1	1
ENST00000554829.1|ENSG00000258414.1|OTTHUMG00000170995.2|OTTHUMT00000411127.1|RP11-356O9.1-001|RP11-356O9.1|738|	ENSMUST00000195637.1|ENSMUSG00000103704.1|OTTMUSG00000047813.1|OTTMUST00000123068.1|Gm37291-001|Gm37291|533|	738	533	0.151873	0.000378923	0	0	0	0	0	0	0	0	0	0	0	0	1	1
ENST00000592982.2|ENSG00000267296.2|OTTHUMG00000180429.2|OTTHUMT00000451326.2|CEBPA-AS1-001|CEBPA-AS1|2198|	ENSMUST00000205799.1|ENSMUSG00000108624.1|OTTMUSG00000058154.1|OTTMUST00000142808.1|Gm45091-001|Gm45091|504|	2198	504	0.151569	0.000387405	2	0	2	2	0	0	6	0	0	2	2	0	0	4
ENST00000440198.2|ENSG00000268894.6|OTTHUMG00000018787.5|OTTHUMT00000049465.2|PLCE1-AS1-001|PLCE1-AS1|964|	ENSMUST00000186584.1|ENSMUSG00000101079.1|OTTMUSG00000045790.1|OTTMUST00000119717.1|Gm28991-001|Gm28991|543|	964	543	0.151472	0.000390163	0	0	0	0	0	0	0	0	0	0	0	0	0	0
ENST00000457033.5|ENSG00000237870.6|OTTHUMG00000066051.2|OTTHUMT00000141445.1|AC073130.1-001|AC073130.1|1958|	ENSMUST00000131334.1|ENSMUSG00000085264.1|OTTMUSG00000024025.1|OTTMUST00000058747.1|Gm15581-001|Gm15581|5640|	1958	5640	0.151379	0.000392791	0	0	0	0	0	0	0	0	0	0	0	0	1	1
ENST00000630020.1|ENSG00000236107.7|OTTHUMG00000154045.6|OTTHUMT00000481071.1|AC010127.3-006|AC010127.3|550|	ENSMUST00000141149.7|ENSMUSG00000087301.7|OTTMUSG00000013098.1|OTTMUST00000031611.1|Gm13629-001|Gm13629|1022|	550	1022	0.151012	0.000403408	0	0	0	0	0	0	0	0	0	0	0	0	0	0
ENST00000420549.1|ENSG00000233290.1|OTTHUMG00000009845.1|OTTHUMT00000027201.1|RP11-147G16.1-001|RP11-147G16.1|671|	ENSMUST00000192546.1|ENSMUSG00000103566.1|OTTMUSG00000047664.1|OTTMUST00000122840.1|Gm38068-001|Gm38068|540|	671	540	0.15098	0.000404344	0	0	0	0	0	0	0	0	0	0	0	0	0	0
ENST00000515750.1|ENSG00000249061.1|OTTHUMG00000162750.1|OTTHUMT00000370321.1|RP11-72L22.1-002|RP11-72L22.1|292|	ENSMUST00000193837.1|ENSMUSG00000103196.1|OTTMUSG00000047821.2|OTTMUST00000123077.2|Gm37641-001|Gm37641|239|	292	239	0.150973	0.000404552	0	0	0	0	0	0	0	0	0	0	0	0	0	0
ENST00000622160.1|ENSG00000277142.1|OTTHUMG00000186631.1|OTTHUMT00000473497.1|LINC00235-001|LINC00235|2253|	ENSMUST00000148064.1|ENSMUSG00000084862.1|OTTMUSG00000033061.1|OTTMUST00000082561.1|Gm16278-001|Gm16278|2071|	2253	2071	0.150905	0.000406558	1	0	1	1	0	0	3	0	0	2	2	0	0	4
ENST00000534086.1|ENSG00000255191.1|OTTHUMG00000167159.1|OTTHUMT00000393501.1|RP11-626H12.1-001|RP11-626H12.1|432|	ENSMUST00000208788.1|ENSMUSG00000109305.1|OTTMUSG00000059416.2|OTTMUST00000145845.1|1810010D01Rik-001|1810010D01Rik|889|	432	889	0.150837	0.000408553	0	0	1	1	0	0	2	0	0	0	1	0	0	1
ENST00000585780.5|ENSG00000267278.5|OTTHUMG00000180362.1|OTTHUMT00000450941.1|MAP3K14-AS1-008|MAP3K14-AS1|2475|	ENSMUST00000123812.1|ENSMUSG00000085360.1|OTTMUSG00000003071.1|OTTMUST00000006315.1|Arhgap27os2-001|Arhgap27os2|1390|	2475	1390	0.150833	0.000408685	0	0	1	1	0	0	2	2	0	3	1	0	0	6
ENST00000437764.5|ENSG00000203706.8|OTTHUMG00000036392.2|OTTHUMT00000088581.1|SERTAD4-AS1-001|SERTAD4-AS1|726|	ENSMUST00000159407.2|ENSMUSG00000089812.2|OTTMUSG00000027054.3|OTTMUST00000066889.3|Gm15867-001|Gm15867|388|	726	388	0.149965	0.000435191	1	0	0	0	0	0	1	0	0	0	0	0	0	0
ENST00000565053.1|ENSG00000259881.1|OTTHUMG00000175521.1|OTTHUMT00000430362.1|RP11-830F9.5-004|RP11-830F9.5|2566|	ENSMUST00000162198.1|ENSMUSG00000090174.1|OTTMUSG00000027607.1|OTTMUST00000068333.1|Gm10612-001|Gm10612|1681|	2566	1681	0.149636	0.000445659	1	0	2	4	0	0	7	0	0	0	0	0	0	0
ENST00000624480.1|ENSG00000279192.1|OTTHUMG00000184194.1|OTTHUMT00000468274.1|PWAR5-001|PWAR5|3180|	ENSMUST00000207198.1|ENSMUSG00000109122.1|OTTMUSG00000058962.1|OTTMUST00000144655.1|A230103L15Rik-001|A230103L15Rik|3872|	3180	3872	0.149314	0.000456116	1	2	0	0	0	1	4	0	0	0	0	0	0	0
ENST00000570416.5|ENSG00000186594.13|OTTHUMG00000132197.7|OTTHUMT00000438375.1|MIR22HG-012|MIR22HG|535|	ENSMUST00000149940.1|ENSMUSG00000085148.1|OTTMUSG00000006201.1|OTTMUST00000013983.1|Mir22hg-001|Mir22hg|1752|	535	1752	0.149162	0.000461152	0	0	1	0	0	0	1	0	0	0	0	0	0	0
ENST00000530572.1|ENSG00000254938.1|OTTHUMG00000165809.1|OTTHUMT00000386314.1|RP11-688I9.4-001|RP11-688I9.4|566|	ENSMUST00000194019.1|ENSMUSG00000102567.1|OTTMUSG00000047756.1|OTTMUST00000122978.1|Gm37038-001|Gm37038|449|	566	449	0.149019	0.000465934	0	0	0	0	0	0	0	0	0	0	0	0	0	0
ENST00000606030.1|ENSG00000272108.1|OTTHUMG00000185595.1|OTTHUMT00000470804.1|AC005754.8-001|AC005754.8|2086|	ENSMUST00000192137.1|ENSMUSG00000073590.3|OTTMUSG00000050777.1|OTTMUST00000128701.1|3222401L13Rik-001|3222401L13Rik|6292|	2086	6292	0.149	0.000466544	1	0	0	0	0	2	3	0	0	0	0	0	2	2
ENST00000455531.1|ENSG00000214548.14|OTTHUMG00000029052.8|OTTHUMT00000104666.1|MEG3-008|MEG3|4867|	ENSMUST00000143272.7|ENSMUSG00000021268.17|OTTMUSG00000023027.1|OTTMUST00000055472.1|Meg3-004|Meg3|5971|	4867	5971	0.148949	0.00046828	2	0	2	4	1	0	9	1	2	3	2	1	1	10
ENST00000441234.1|ENSG00000225953.2|OTTHUMG00000154470.1|OTTHUMT00000335370.1|SATB2-AS1-004|SATB2-AS1|468|	ENSMUST00000135238.3|ENSMUSG00000087022.4|OTTMUSG00000040158.2|OTTMUST00000104378.2|9130024F11Rik-001|9130024F11Rik|1300|	468	1300	0.148718	0.000476113	0	0	0	0	0	0	0	2	0	0	0	0	2	4
ENST00000442086.1|ENSG00000236507.1|OTTHUMG00000067507.1|OTTHUMT00000144685.1|RP5-1050E16.1-001|RP5-1050E16.1|928|	ENSMUST00000192362.1|ENSMUSG00000102173.1|OTTMUSG00000047820.1|OTTMUST00000123076.1|Gm37872-001|Gm37872|886|	928	886	0.147937	0.000503589	0	0	0	0	0	0	0	0	0	0	0	0	0	0
ENST00000430464.1|ENSG00000225497.5|OTTHUMG00000018537.1|OTTHUMT00000048853.1|KCNMA1-AS2-002|KCNMA1-AS2|290|	ENSMUST00000187439.1|ENSMUSG00000100100.1|OTTMUSG00000045722.1|OTTMUST00000119642.1|Gm29626-002|Gm29626|296|	290	296	0.147788	0.000508993	0	0	0	0	0	0	0	0	0	0	0	0	0	0
ENST00000590304.1|ENSG00000266963.1|OTTHUMG00000182326.1|OTTHUMT00000460526.1|AC005625.1-001|AC005625.1|472|	ENSMUST00000184073.1|ENSMUSG00000099098.4|OTTMUSG00000044907.1|OTTMUST00000118031.1|1110035H17Rik-001|1110035H17Rik|1241|	472	1241	0.147698	0.000512272	0	0	1	1	0	0	2	0	0	2	1	0	0	3
ENST00000602353.1|ENSG00000270091.1|OTTHUMG00000184070.1|OTTHUMT00000467974.1|RP11-78O7.2-002|RP11-78O7.2|681|	ENSMUST00000148413.2|ENSMUSG00000072847.4|OTTMUSG00000005844.2|OTTMUST00000012999.2|A530017D24Rik-001|A530017D24Rik|1313|	681	1313	0.147639	0.000514451	0	0	0	0	0	0	0	0	0	0	0	0	1	1
ENST00000564460.2|ENSG00000260316.2|OTTHUMG00000172829.2|OTTHUMT00000420781.2|LA16c-306A4.2-001|LA16c-306A4.2|4728|	ENSMUST00000180868.1|ENSMUSG00000097518.1|-|-|Gm26694-201|Gm26694|1902|	4728	1902	0.14591	0.000582014	1	2	4	1	0	1	9	0	0	0	1	0	0	1
ENST00000419860.1|ENSG00000237271.1|OTTHUMG00000154544.1|OTTHUMT00000335870.1|AC009498.1-001|AC009498.1|541|	ENSMUST00000186533.1|ENSMUSG00000100893.1|OTTMUSG00000047590.1|OTTMUST00000122728.1|Gm28083-001|Gm28083|538|	541	538	0.145903	0.000582302	0	0	0	0	0	0	0	0	0	0	0	0	0	0
ENST00000607004.5|ENSG00000203930.10|OTTHUMG00000022548.3|OTTHUMT00000470156.1|LINC00632-005|LINC00632|648|	ENSMUST00000137153.7|ENSMUSG00000071753.11|OTTMUSG00000017618.1|OTTMUST00000042803.1|C230004F18Rik-003|C230004F18Rik|2138|	648	2138	0.145813	0.000586021	1	0	1	0	0	1	3	0	0	0	0	0	0	0
ENST00000457303.3|ENSG00000232648.3|OTTHUMG00000160630.1|OTTHUMT00000361497.1|RP11-367N14.2-001|RP11-367N14.2|559|	ENSMUST00000098781.2|ENSMUSG00000074357.3|OTTMUSG00000061494.1|-|AA386476-201|AA386476|1665|	559	1665	0.145666	0.000592157	0	0	1	1	0	0	2	2	0	2	2	0	0	6
ENST00000333666.1|ENSG00000182376.2|OTTHUMG00000173435.1|OTTHUMT00000423098.1|RP5-1142A6.8-002|RP5-1142A6.8|2137|	ENSMUST00000162198.1|ENSMUSG00000090174.1|OTTMUSG00000027607.1|OTTMUST00000068333.1|Gm10612-001|Gm10612|1681|	2137	1681	0.145608	0.00059461	0	0	1	3	0	0	4	0	0	0	0	0	0	0
ENST00000332012.5|ENSG00000185168.5|OTTHUMG00000177904.1|OTTHUMT00000439605.1|LINC00482-001|LINC00482|2023|	ENSMUST00000139014.1|ENSMUSG00000043993.6|OTTMUSG00000004130.2|OTTMUST00000009324.2|2900052L18Rik-001|2900052L18Rik|1588|	2023	1588	0.145499	0.000599248	1	0	2	0	0	0	3	0	0	1	1	0	0	2
ENST00000424852.1|ENSG00000229891.1|OTTHUMG00000150696.1|OTTHUMT00000319654.1|LINC01315-001|LINC01315|1142|	ENSMUST00000188623.1|ENSMUSG00000100552.1|OTTMUSG00000047229.2|OTTMUST00000122124.2|Gm29019-001|Gm29019|564|	1142	564	0.145132	0.000615023	1	0	1	0	0	0	2	0	0	0	0	0	0	0
ENST00000604411.1|ENSG00000270641.1|OTTHUMG00000184725.1|OTTHUMT00000469120.1|TSIX-001|TSIX|37027|	ENSMUST00000181020.8|ENSMUSG00000097571.8|OTTMUSG00000043165.1|OTTMUST00000113249.1|Jpx-001|Jpx|3802|	37027	3802	0.145084	0.000617124	4	1	3	1	2	11	22	2	0	0	1	2	4	9
ENST00000524042.1|ENSG00000253104.1|OTTHUMG00000163826.1|OTTHUMT00000375803.1|RP11-855C21.1-001|RP11-855C21.1|501|	ENSMUST00000195204.1|ENSMUSG00000103296.1|OTTMUSG00000047323.1|OTTMUST00000122325.1|Gm38234-001|Gm38234|421|	501	421	0.144883	0.000625995	0	0	0	0	0	0	0	0	0	0	0	0	0	0
ENST00000573167.2|ENSG00000226137.5|OTTHUMG00000177697.3|OTTHUMT00000438545.2|BAIAP2-AS1-002|BAIAP2-AS1|4014|	ENSMUST00000139014.1|ENSMUSG00000043993.6|OTTMUSG00000004130.2|OTTMUST00000009324.2|2900052L18Rik-001|2900052L18Rik|1588|	4014	1588	0.144765	0.000631246	0	1	1	1	0	0	3	0	0	1	1	0	0	2
ENST00000415992.5|ENSG00000273066.5|OTTHUMG00000186354.1|OTTHUMT00000472993.1|RP11-216L13.19-001|RP11-216L13.19|4244|	ENSMUST00000137661.1|ENSMUSG00000087612.1|OTTMUSG00000012624.1|OTTMUST00000030052.1|A230005M16Rik-001|A230005M16Rik|1605|	4244	1605	0.144624	0.000637554	1	1	2	3	0	0	7	0	0	1	0	0	1	2
ENST00000592607.4|ENSG00000224609.6|OTTHUMG00000008403.5|OTTHUMT00000460141.1|HSD52-004|HSD52|605|	ENSMUST00000187014.1|ENSMUSG00000100129.1|OTTMUSG00000047716.2|OTTMUST00000122929.2|Gm29064-001|Gm29064|813|	605	813	0.144365	0.000649321	0	0	0	0	0	1	1	0	0	0	0	0	0	0
ENST00000418387.1|ENSG00000235056.1|OTTHUMG00000154373.1|OTTHUMT00000334988.1|AC010983.1-001|AC010983.1|1028|	ENSMUST00000194762.1|ENSMUSG00000104067.1|OTTMUSG00000047535.1|OTTMUST00000122640.1|Gm37196-001|Gm37196|906|	1028	906	0.144195	0.000657174	1	0	0	0	0	1	2	0	0	0	0	0	1	1
ENST00000446979.1|ENSG00000225493.1|OTTHUMG00000152849.1|OTTHUMT00000328258.1|LINC01107-001|LINC01107|1975|	ENSMUST00000187564.1|ENSMUSG00000100980.1|OTTMUSG00000048551.1|OTTMUST00000124402.1|Gm29100-001|Gm29100|4410|	1975	4410	0.144067	0.000663146	1	0	2	1	0	0	4	0	0	3	0	0	0	3
ENST00000608612.1|ENSG00000272702.1|OTTHUMG00000185982.2|OTTHUMT00000471908.1|RP11-44N22.3-001|RP11-44N22.3|420|	ENSMUST00000150233.2|ENSMUSG00000085794.5|OTTMUSG00000037559.1|OTTMUST00000096827.1|Vax2os-002|Vax2os|595|	420	595	0.143641	0.000683369	0	0	1	1	0	0	2	0	0	1	0	0	0	1
ENST00000460977.1|ENSG00000244327.1|OTTHUMG00000159252.1|OTTHUMT00000354098.1|RP11-383G6.3-001|RP11-383G6.3|765|	ENSMUST00000192006.1|ENSMUSG00000103611.1|OTTMUSG00000047690.1|OTTMUST00000122889.1|Gm37195-001|Gm37195|3018|	765	3018	0.143428	0.000693676	1	0	0	0	0	0	1	2	1	0	0	0	2	5
ENST00000623679.1|ENSG00000279518.1|OTTHUMG00000172341.1|OTTHUMT00000418011.1|AC083843.4-001|AC083843.4|2186|	ENSMUST00000194661.1|ENSMUSG00000096967.3|OTTMUSG00000042919.1|OTTMUST00000112737.1|Gm26621-001|Gm26621|2716|	2186	2716	0.143258	0.000702022	0	1	0	0	0	0	1	0	0	0	0	0	0	0
ENST00000456653.6|ENSG00000237877.6|OTTHUMG00000154250.4|OTTHUMT00000334545.2|LINC01473-002|LINC01473|1079|	ENSMUST00000191096.1|ENSMUSG00000102082.1|OTTMUSG00000047319.1|OTTMUST00000122321.1|Gm28675-001|Gm28675|675|	1079	675	0.1432	0.000704894	0	0	0	0	0	1	1	0	0	0	0	0	1	1
ENST00000414085.1|ENSG00000236028.1|OTTHUMG00000032661.1|OTTHUMT00000079584.1|RP11-323C15.2-001|RP11-323C15.2|423|	ENSMUST00000187099.1|ENSMUSG00000100796.1|OTTMUSG00000047564.2|OTTMUST00000122673.2|Gm28163-001|Gm28163|325|	423	325	0.14308	0.000710894	0	0	0	0	0	0	0	0	0	1	0	0	1	2
ENST00000441716.2|ENSG00000235994.4|OTTHUMG00000016038.2|OTTHUMT00000043184.2|RP3-470B24.5-001|RP3-470B24.5|757|	ENSMUST00000155166.1|ENSMUSG00000086465.1|OTTMUSG00000029529.1|OTTMUST00000073183.1|Gm16049-001|Gm16049|616|	757	616	0.142926	0.000718615	0	0	1	2	0	0	3	0	0	0	0	0	0	0
ENST00000500447.1|ENSG00000247095.2|OTTHUMG00000165284.1|OTTHUMT00000383231.1|MIR210HG-001|MIR210HG|1965|	ENSMUST00000129373.1|ENSMUSG00000086844.1|OTTMUSG00000024586.1|OTTMUST00000060400.1|B230206H07Rik-001|B230206H07Rik|2935|	1965	2935	0.142507	0.000740063	0	0	0	0	0	0	0	0	0	1	2	0	0	3
ENST00000559246.1|ENSG00000259336.1|OTTHUMG00000172320.1|OTTHUMT00000417821.1|RP11-323I15.5-001|RP11-323I15.5|1342|	ENSMUST00000187452.1|ENSMUSG00000101266.1|OTTMUSG00000047536.2|OTTMUST00000122641.2|Gm29234-001|Gm29234|1262|	1342	1262	0.142296	0.00075108	0	0	0	0	0	1	1	2	0	0	0	0	1	3
ENST00000483578.1|ENSG00000260899.1|OTTHUMG00000176916.1|OTTHUMT00000434319.1|RP11-2C24.4-001|RP11-2C24.4|883|	ENSMUST00000147487.1|ENSMUSG00000086502.1|OTTMUSG00000022495.1|OTTMUST00000053852.1|B130055M24Rik-002|B130055M24Rik|1142|	883	1142	0.142281	0.000751846	0	0	1	2	0	0	3	2	0	1	1	0	0	4
ENST00000629870.1|ENSG00000281649.1|OTTHUMG00000019910.4|OTTHUMT00000458674.1|EBLN3-003|EBLN3|958|	ENSMUST00000192889.1|ENSMUSG00000103995.1|OTTMUSG00000046053.1|OTTMUST00000120262.1|5730488B01Rik-001|5730488B01Rik|2311|	958	2311	0.142065	0.000763301	0	0	1	1	0	0	2	2	0	3	3	0	0	8
ENST00000528982.1|ENSG00000255108.1|OTTHUMG00000165497.1|OTTHUMT00000384480.1|AP006621.8-002|AP006621.8|464|	ENSMUST00000134845.1|ENSMUSG00000086844.1|OTTMUSG00000024586.1|OTTMUST00000060401.1|B230206H07Rik-002|B230206H07Rik|3269|	464	3269	0.141516	0.000793177	0	0	0	0	0	0	0	0	0	1	1	0	0	2
ENST00000523301.1|ENSG00000245812.2|OTTHUMG00000163513.1|OTTHUMT00000373928.1|RP11-175K6.1-003|RP11-175K6.1|568|	ENSMUST00000191765.1|ENSMUSG00000102563.1|OTTMUSG00000047431.1|OTTMUST00000122479.1|Gm37695-001|Gm37695|530|	568	530	0.141515	0.000793235	0	0	1	1	1	1	4	0	0	1	1	0	0	2
ENST00000441214.1|ENSG00000233077.1|OTTHUMG00000032720.1|OTTHUMT00000079680.1|LINC01271-001|LINC01271|2250|	ENSMUST00000143649.1|ENSMUSG00000087684.1|OTTMUSG00000016309.1|OTTMUST00000039189.1|1200007C13Rik-001|1200007C13Rik|2455|	2250	2455	0.141395	0.000799895	0	0	2	0	0	0	2	0	0	1	1	0	0	2
ENST00000620617.1|ENSG00000275964.1|OTTHUMG00000187050.1|OTTHUMT00000474335.1|RP11-61K9.3-001|RP11-61K9.3|1191|	ENSMUST00000186474.1|ENSMUSG00000100017.1|OTTMUSG00000046451.1|OTTMUST00000120940.1|2410022M11Rik-001|2410022M11Rik|3645|	1191	3645	0.141322	0.000803991	1	0	2	2	0	0	5	2	0	1	1	0	0	4
ENST00000624384.1|ENSG00000280202.1|OTTHUMG00000165347.2|OTTHUMT00000383537.2|RP5-1180D12.1-001|RP5-1180D12.1|1697|	ENSMUST00000202455.1|ENSMUSG00000106962.1|OTTMUSG00000056356.1|OTTMUST00000139268.1|Gm43633-001|Gm43633|2330|	1697	2330	0.141139	0.00081432	2	0	0	1	0	4	7	2	0	0	0	0	3	5
ENST00000416350.1|ENSG00000237220.1|OTTHUMG00000153758.1|OTTHUMT00000332350.1|AC104777.3-001|AC104777.3|545|	ENSMUST00000191519.1|ENSMUSG00000100496.1|OTTMUSG00000047524.1|OTTMUST00000122610.1|Gm28639-001|Gm28639|481|	545	481	0.141084	0.000817409	0	0	0	0	0	1	1	0	0	0	0	0	1	1
ENST00000493033.1|ENSG00000241490.1|OTTHUMG00000159333.1|OTTHUMT00000354698.1|RP11-553L6.2-002|RP11-553L6.2|3023|	ENSMUST00000147504.1|ENSMUSG00000055370.3|OTTMUSG00000025578.2|OTTMUST00000063016.1|Gm9968-001|Gm9968|2990|	3023	2990	0.140819	0.00083266	1	0	0	0	0	2	3	0	0	0	0	0	0	0
ENST00000453722.6|ENSG00000227036.6|OTTHUMG00000132227.4|OTTHUMT00000255287.2|LINC00511-002|LINC00511|1716|	ENSMUST00000127263.7|ENSMUSG00000087259.7|OTTMUSG00000003314.1|OTTMUST00000006940.1|2610035D17Rik-003|2610035D17Rik|1861|	1716	1861	0.140598	0.000845564	1	0	1	2	0	0	4	1	1	1	1	0	1	5
ENST00000527021.2|ENSG00000269915.1|OTTHUMG00000183950.1|OTTHUMT00000467568.1|AP006621.9-001|AP006621.9|532|	ENSMUST00000097947.3|ENSMUSG00000073787.4|OTTMUSG00000036655.3|OTTMUST00000093932.1|Gm10575-001|Gm10575|1671|	532	1671	0.140045	0.000878667	0	0	0	1	0	0	1	0	0	3	3	0	0	6
ENST00000438575.5|ENSG00000227579.5|OTTHUMG00000040862.1|OTTHUMT00000098154.1|RP1-35C21.2-001|RP1-35C21.2|798|	ENSMUST00000192097.1|ENSMUSG00000102789.1|OTTMUSG00000047519.1|OTTMUST00000122605.1|Gm38256-001|Gm38256|950|	798	950	0.139574	0.000907801	0	0	0	0	0	0	0	0	0	0	0	0	0	0
ENST00000453342.5|ENSG00000224897.6|OTTHUMG00000157170.1|OTTHUMT00000347736.1|POT1-AS1-002|POT1-AS1|3252|	ENSMUST00000201080.1|ENSMUSG00000106799.1|OTTMUSG00000056019.1|OTTMUST00000138554.1|Gm20756-002|Gm20756|1595|	3252	1595	0.139557	0.000908889	1	0	0	0	0	1	2	1	1	0	0	0	2	4
ENST00000469484.1|ENSG00000244586.1|OTTHUMG00000158382.1|OTTHUMT00000350841.1|WNT5A-AS1-001|WNT5A-AS1|500|	ENSMUST00000180668.1|ENSMUSG00000097002.1|-|-|Gm2670-201|Gm2670|2804|	500	2804	0.139496	0.000912735	0	1	1	0	0	0	2	0	0	1	2	0	0	3
ENST00000570080.1|ENSG00000260136.5|OTTHUMG00000177094.1|OTTHUMT00000435277.1|CTD-2270L9.4-001|CTD-2270L9.4|730|	ENSMUST00000191155.1|ENSMUSG00000053081.3|OTTMUSG00000045303.1|OTTMUST00000118967.1|1700069B07Rik-001|1700069B07Rik|939|	730	939	0.139432	0.000916794	0	0	0	0	0	0	0	0	1	1	1	0	0	3
ENST00000554412.2|ENSG00000258489.3|OTTHUMG00000171820.2|OTTHUMT00000415218.2|RP11-398J10.2-001|RP11-398J10.2|1057|	ENSMUST00000186618.1|ENSMUSG00000100664.1|OTTMUSG00000046226.1|OTTMUST00000120541.1|6030442E23Rik-001|6030442E23Rik|642|	1057	642	0.139397	0.000919001	1	0	0	0	0	0	1	0	0	0	0	0	0	0
ENST00000503757.1|ENSG00000249521.1|OTTHUMG00000161644.1|OTTHUMT00000365584.1|CTD-2161F6.3-001|CTD-2161F6.3|801|	ENSMUST00000194509.1|ENSMUSG00000102303.1|OTTMUSG00000047362.1|OTTMUST00000122371.1|Gm38191-001|Gm38191|770|	801	770	0.139255	0.000928046	0	0	0	0	0	0	0	0	0	0	0	0	0	0
ENST00000581303.1|ENSG00000264548.1|OTTHUMG00000178600.1|OTTHUMT00000442627.1|RP13-516M14.2-001|RP13-516M14.2|2368|	ENSMUST00000151998.1|ENSMUSG00000053613.6|OTTMUSG00000004079.1|OTTMUST00000009152.1|Notumos-001|Notumos|2659|	2368	2659	0.139099	0.000938124	0	0	0	1	0	0	1	2	0	3	1	0	0	6
ENST00000591365.1|ENSG00000267121.5|OTTHUMG00000180195.1|OTTHUMT00000450194.1|CTD-2020K17.1-001|CTD-2020K17.1|2238|	ENSMUST00000139621.1|ENSMUSG00000078635.3|OTTMUSG00000003048.1|OTTMUST00000006258.1|1700028N14Rik-001|1700028N14Rik|747|	2238	747	0.138846	0.000954676	1	0	3	1	0	0	5	2	0	1	0	0	0	3
ENST00000576021.1|ENSG00000262413.1|OTTHUMG00000177881.1|OTTHUMT00000439447.1|RP11-498C9.3-001|RP11-498C9.3|479|	ENSMUST00000151998.1|ENSMUSG00000053613.6|OTTMUSG00000004079.1|OTTMUST00000009152.1|Notumos-001|Notumos|2659|	479	2659	0.138718	0.000963113	0	0	0	0	0	0	0	2	0	3	1	0	0	6
ENST00000587534.1|ENSG00000233175.2|OTTHUMG00000180197.1|OTTHUMT00000450209.1|CTD-2020K17.3-001|CTD-2020K17.3|2003|	ENSMUST00000174079.1|ENSMUSG00000092371.1|OTTMUSG00000037288.1|OTTMUST00000096195.1|Gm20511-001|Gm20511|456|	2003	456	0.138714	0.000963417	0	0	3	3	1	1	8	0	0	1	1	0	0	2
ENST00000420648.2|ENSG00000234877.2|OTTHUMG00000152871.2|OTTHUMT00000328311.2|AC092660.1-001|AC092660.1|371|	ENSMUST00000186773.1|ENSMUSG00000101720.1|OTTMUSG00000047423.1|OTTMUST00000122466.1|Gm29005-001|Gm29005|320|	371	320	0.138346	0.000988137	0	0	0	0	0	0	0	0	0	0	0	0	0	0
ENST00000435697.1|ENSG00000215386.11|OTTHUMG00000074377.4|OTTHUMT00000158036.2|MIR99AHG-008|MIR99AHG|716|	ENSMUST00000195792.1|ENSMUSG00000103916.1|OTTMUSG00000043471.1|OTTMUST00000114006.1|Gm38071-001|Gm38071|3378|	716	3378	0.138134	0.00100265	1	0	0	0	0	0	1	0	0	1	0	0	2	3
ENST00000359760.5|ENSG00000198221.8|OTTHUMG00000016029.2|OTTHUMT00000043143.2|MLLT4-AS1-001|MLLT4-AS1|2238|	ENSMUST00000155166.1|ENSMUSG00000086465.1|OTTMUSG00000029529.1|OTTMUST00000073183.1|Gm16049-001|Gm16049|616|	2238	616	0.137673	0.00103496	1	2	2	0	0	1	6	0	0	0	0	0	0	0
ENST00000509628.1|ENSG00000251488.1|OTTHUMG00000161298.1|OTTHUMT00000364453.1|RP11-404I7.2-001|RP11-404I7.2|587|	ENSMUST00000192347.1|ENSMUSG00000103477.1|OTTMUSG00000051980.1|OTTMUST00000130796.1|5930409G06Rik-001|5930409G06Rik|1544|	587	1544	0.137658	0.001036	1	0	0	0	0	1	2	2	0	0	0	0	2	4
ENST00000424528.2|ENSG00000225206.7|OTTHUMG00000010680.3|OTTHUMT00000029437.3|MIR137HG-001|MIR137HG|2639|	ENSMUST00000194141.1|ENSMUSG00000104033.1|OTTMUSG00000042757.1|OTTMUST00000112500.1|Gm37773-001|Gm37773|2120|	2639	2120	0.137533	0.00104496	0	0	0	0	0	0	0	3	0	0	0	0	3	6
ENST00000566114.1|ENSG00000260617.1|OTTHUMG00000173434.1|OTTHUMT00000423097.1|RP5-1142A6.7-001|RP5-1142A6.7|558|	ENSMUST00000162198.1|ENSMUSG00000090174.1|OTTMUSG00000027607.1|OTTMUST00000068333.1|Gm10612-001|Gm10612|1681|	558	1681	0.137437	0.00105183	0	0	2	1	0	0	3	0	0	0	0	0	0	0
ENST00000618027.1|ENSG00000274031.1|OTTHUMG00000186939.1|OTTHUMT00000474055.1|RP11-413H22.3-001|RP11-413H22.3|521|	ENSMUST00000181864.1|ENSMUSG00000097520.1|-|-|Gm26843-201|Gm26843|3246|	521	3246	0.13709	0.00107717	1	0	0	0	0	1	2	2	0	2	1	1	4	10
ENST00000427153.1|ENSG00000225969.1|OTTHUMG00000153263.1|OTTHUMT00000330453.1|ABHD11-AS1-001|ABHD11-AS1|558|	ENSMUST00000136022.7|ENSMUSG00000085042.7|OTTMUSG00000025994.1|OTTMUST00000064127.1|Abhd11os-002|Abhd11os|604|	558	604	0.136935	0.00108861	0	0	0	1	0	0	1	0	0	0	0	0	0	0
ENST00000440322.5|ENSG00000224490.5|OTTHUMG00000154082.1|OTTHUMT00000333766.1|TTC21B-AS1-001|TTC21B-AS1|2260|	ENSMUST00000127849.1|ENSMUSG00000085386.1|OTTMUSG00000013101.1|OTTMUST00000031615.1|Gm13630-001|Gm13630|3650|	2260	3650	0.136911	0.0010904	1	0	0	0	0	1	2	2	0	1	0	0	4	7
ENST00000509506.1|ENSG00000249100.1|OTTHUMG00000162559.1|OTTHUMT00000369567.1|CTD-2218K11.2-001|CTD-2218K11.2|930|	ENSMUST00000192337.1|ENSMUSG00000102793.1|OTTMUSG00000047826.2|OTTMUST00000123082.2|Gm37708-001|Gm37708|895|	930	895	0.136427	0.00112712	0	0	0	0	0	0	0	0	0	0	0	0	0	0
ENST00000612013.1|ENSG00000276728.1|OTTHUMG00000186651.1|OTTHUMT00000473533.1|AC142472.6-001|AC142472.6|1741|	ENSMUST00000139621.1|ENSMUSG00000078635.3|OTTMUSG00000003048.1|OTTMUST00000006258.1|1700028N14Rik-001|1700028N14Rik|747|	1741	747	0.136186	0.00114583	1	0	0	2	1	0	4	2	0	1	0	0	0	3
ENST00000455565.5|ENSG00000204650.13|OTTHUMG00000191410.1|OTTHUMT00000441193.1|CRHR1-IT1-005|CRHR1-IT1|2609|	ENSMUST00000123812.1|ENSMUSG00000085360.1|OTTMUSG00000003071.1|OTTMUST00000006315.1|Arhgap27os2-001|Arhgap27os2|1390|	2609	1390	0.136082	0.00115392	2	0	2	1	0	1	6	2	0	3	1	0	0	6
ENST00000436594.1|ENSG00000228421.2|OTTHUMG00000152794.3|OTTHUMT00000327953.3|AC005013.5-001|AC005013.5|588|	ENSMUST00000204633.1|ENSMUSG00000108255.1|OTTMUSG00000057153.1|OTTMUST00000140736.1|Gm16499-001|Gm16499|2177|	588	2177	0.136033	0.00115784	0	0	0	0	0	0	0	1	0	0	2	0	0	3
ENST00000446227.2|ENSG00000231364.2|OTTHUMG00000009772.2|OTTHUMT00000026942.2|RP11-413G15.1-001|RP11-413G15.1|1044|	ENSMUST00000191620.1|ENSMUSG00000103302.1|OTTMUSG00000047663.1|OTTMUST00000122839.1|Gm37803-001|Gm37803|711|	1044	711	0.135995	0.0011608	0	0	0	0	0	0	0	0	0	0	0	0	0	0
ENST00000427892.1|ENSG00000224149.1|OTTHUMG00000009694.1|OTTHUMT00000026703.1|RP11-510C10.3-001|RP11-510C10.3|2203|	ENSMUST00000177201.1|ENSMUSG00000093738.2|OTTMUSG00000039752.2|OTTMUST00000103369.1|AI606473-001|AI606473|1731|	2203	1731	0.135869	0.00117081	1	0	1	1	0	0	3	0	0	0	0	0	0	0
ENST00000608748.1|ENSG00000272864.1|OTTHUMG00000186134.1|OTTHUMT00000472308.1|RP11-17E13.2-001|RP11-17E13.2|565|	ENSMUST00000194899.1|ENSMUSG00000104122.1|OTTMUSG00000052255.1|OTTMUST00000131269.1|Gm37482-001|Gm37482|2791|	565	2791	0.13585	0.00117231	0	0	0	0	0	1	1	0	0	0	0	0	0	0
ENST00000608941.1|ENSG00000272729.1|OTTHUMG00000186066.1|OTTHUMT00000472162.1|RP11-387A1.5-001|RP11-387A1.5|1553|	ENSMUST00000156342.1|ENSMUSG00000052371.5|OTTMUSG00000016596.1|OTTMUST00000040116.1|Hoxd3os1-003|Hoxd3os1|796|	1553	796	0.135735	0.0011816	0	0	2	1	0	0	3	0	0	1	0	0	0	1
ENST00000623228.1|ENSG00000279369.1|OTTHUMG00000176077.1|OTTHUMT00000431478.1|RP11-51F16.1-001|RP11-51F16.1|1824|	ENSMUST00000195385.1|ENSMUSG00000103469.1|OTTMUSG00000044544.1|OTTMUST00000117241.1|Gm9910-001|Gm9910|1550|	1824	1550	0.135556	0.00119603	0	0	0	1	0	0	1	0	0	2	2	0	0	4
ENST00000538294.1|ENSG00000250748.6|OTTHUMG00000168872.1|OTTHUMT00000401444.1|RP11-230G5.2-009|RP11-230G5.2|520|	ENSMUST00000195670.1|ENSMUSG00000103017.1|OTTMUSG00000047438.1|OTTMUST00000122487.1|Gm37505-001|Gm37505|461|	520	461	0.135492	0.00120124	0	0	0	0	0	0	0	0	0	0	0	0	0	0
ENST00000439810.5|ENSG00000223930.5|OTTHUMG00000157254.2|OTTHUMT00000348245.1|RP11-33A14.1-001|RP11-33A14.1|579|	ENSMUST00000194795.1|ENSMUSG00000102807.1|OTTMUSG00000047565.1|OTTMUST00000122674.1|Gm37480-001|Gm37480|550|	579	550	0.135408	0.00120814	0	0	0	0	0	0	0	0	0	0	0	0	0	0
ENST00000554726.1|ENSG00000224078.12|OTTHUMG00000056661.10|OTTHUMT00000414071.1|SNHG14-023|SNHG14|1116|	ENSMUST00000207177.1|ENSMUSG00000108943.1|OTTMUSG00000058958.1|OTTMUST00000144651.1|Gm44559-001|Gm44559|1012|	1116	1012	0.134969	0.00124468	0	0	0	0	0	0	0	0	0	0	0	0	0	0
ENST00000568811.1|ENSG00000261728.1|OTTHUMG00000175980.1|OTTHUMT00000431342.1|RP11-307O13.1-001|RP11-307O13.1|2243|	ENSMUST00000198939.1|ENSMUSG00000104677.1|OTTMUSG00000053043.2|OTTMUST00000134245.1|Gm43376-002|Gm43376|1887|	2243	1887	0.134776	0.00126107	0	0	1	0	0	1	2	0	1	0	0	0	0	1
ENST00000442166.2|ENSG00000224729.5|OTTHUMG00000156674.2|OTTHUMT00000356401.1|PCOLCE-AS1-001|PCOLCE-AS1|2537|	ENSMUST00000197762.1|ENSMUSG00000106237.1|OTTMUSG00000054538.1|OTTMUST00000135200.1|Gm8066-001|Gm8066|485|	2537	485	0.134669	0.00127025	1	0	3	2	0	0	6	0	0	1	1	0	0	2
ENST00000609553.1|ENSG00000273486.1|OTTHUMG00000185980.1|OTTHUMT00000471906.1|RP11-731C17.2-001|RP11-731C17.2|1684|	ENSMUST00000192389.1|ENSMUSG00000103657.1|OTTMUSG00000048623.1|OTTMUST00000124538.1|Gm37204-001|Gm37204|3961|	1684	3961	0.134655	0.00127144	0	0	0	0	0	1	1	2	0	0	0	0	3	5
ENST00000565254.1|ENSG00000261668.1|OTTHUMG00000176114.1|OTTHUMT00000431523.1|RP11-50D9.3-001|RP11-50D9.3|3843|	ENSMUST00000203407.1|ENSMUSG00000097583.2|OTTMUSG00000053343.2|OTTMUST00000133371.1|6430590A07Rik-002|6430590A07Rik|3631|	3843	3631	0.134543	0.00128117	2	1	0	1	0	5	9	1	0	0	0	0	5	6
ENST00000526623.2|ENSG00000254614.2|OTTHUMG00000165613.2|OTTHUMT00000385303.2|AP003068.23-001|AP003068.23|1662|	ENSMUST00000180505.1|ENSMUSG00000097404.1|-|-|Gm10814-201|Gm10814|1933|	1662	1933	0.134305	0.00130196	0	0	2	3	0	0	5	0	0	1	2	0	0	3
ENST00000442478.1|ENSG00000234625.1|OTTHUMG00000017187.1|OTTHUMT00000045439.1|LINC00380-001|LINC00380|353|	ENSMUST00000194590.1|ENSMUSG00000103140.1|OTTMUSG00000047830.1|OTTMUST00000123086.1|Gm37495-001|Gm37495|264|	353	264	0.13429	0.00130331	0	0	0	0	0	0	0	0	0	0	0	0	0	0
ENST00000613454.1|ENSG00000275441.1|OTTHUMG00000186839.1|OTTHUMT00000473877.1|RP11-666O2.2-001|RP11-666O2.2|432|	ENSMUST00000187458.1|ENSMUSG00000066175.2|OTTMUSG00000046564.1|OTTMUST00000121097.1|2510046G10Rik-001|2510046G10Rik|1052|	432	1052	0.134284	0.0013038	1	0	1	0	0	0	2	0	0	1	1	0	0	2
ENST00000609843.1|ENSG00000272650.1|OTTHUMG00000186276.1|OTTHUMT00000472584.1|RP11-571I18.4-001|RP11-571I18.4|298|	ENSMUST00000202336.1|ENSMUSG00000107205.1|OTTMUSG00000056077.1|OTTMUST00000138645.1|Gm42576-001|Gm42576|2846|	298	2846	0.134194	0.00131178	1	0	0	0	0	1	2	1	0	0	0	0	4	5
ENST00000575312.1|ENSG00000262049.1|OTTHUMG00000178170.1|OTTHUMT00000440811.1|RP13-1032I1.7-001|RP13-1032I1.7|1977|	ENSMUST00000142520.1|ENSMUSG00000086929.1|OTTMUSG00000004271.1|OTTMUST00000009683.1|Gm11788-001|Gm11788|562|	1977	562	0.134031	0.00132632	0	0	0	2	0	0	2	0	0	2	2	0	0	4
ENST00000605946.1|ENSG00000237036.4|OTTHUMG00000017905.3|OTTHUMT00000470836.1|ZEB1-AS1-007|ZEB1-AS1|382|	ENSMUST00000074702.9|ENSMUSG00000063087.14|OTTMUSG00000030926.6|OTTMUST00000076528.4|Gm10125-001|Gm10125|2286|	382	2286	0.133958	0.00133286	0	0	0	1	0	0	1	0	1	0	0	0	0	1
ENST00000530792.1|ENSG00000255136.2|OTTHUMG00000165439.2|OTTHUMT00000384086.1|CTD-2562J17.4-001|CTD-2562J17.4|495|	ENSMUST00000183019.1|ENSMUSG00000097974.1|OTTMUSG00000043547.1|OTTMUST00000114258.1|Gm10605-001|Gm10605|3198|	495	3198	0.133957	0.00133296	0	0	0	1	0	0	1	0	1	3	3	0	1	8
ENST00000416344.1|ENSG00000234281.5|OTTHUMG00000154735.1|OTTHUMT00000336825.1|LANCL1-AS1-003|LANCL1-AS1|714|	ENSMUST00000195880.1|ENSMUSG00000103382.1|OTTMUSG00000047113.1|OTTMUST00000121925.1|Gm37755-001|Gm37755|2179|	714	2179	0.133836	0.00134385	0	0	0	0	0	0	0	0	0	0	0	0	0	0
ENST00000409569.2|ENSG00000172965.14|OTTHUMG00000150313.9|OTTHUMT00000317532.1|MIR4435-2HG-001|MIR4435-2HG|514|	ENSMUST00000138486.1|ENSMUSG00000074813.12|OTTMUSG00000015351.1|OTTMUST00000036384.1|Gm14005-005|Gm14005|415|	514	415	0.133639	0.00136185	0	0	0	0	0	0	0	0	0	1	0	0	0	1
ENST00000317008.4|ENSG00000178412.4|OTTHUMG00000180271.2|OTTHUMT00000450524.1|RP11-567M16.3-001|RP11-567M16.3|1111|	ENSMUST00000191632.1|ENSMUSG00000102260.1|OTTMUSG00000044920.1|OTTMUST00000118071.1|D330025C20Rik-001|D330025C20Rik|3046|	1111	3046	0.133411	0.00138295	2	0	1	1	0	0	4	1	0	1	1	0	1	4
ENST00000447795.3|ENSG00000232671.5|OTTHUMG00000012346.6|OTTHUMT00000034395.4|RP11-126K1.2-001|RP11-126K1.2|622|	ENSMUST00000128160.1|ENSMUSG00000085956.1|OTTMUSG00000019661.1|OTTMUST00000047038.1|4930481B07Rik-001|4930481B07Rik|1089|	622	1089	0.133388	0.00138506	0	0	2	0	0	0	2	1	1	1	1	0	0	4
ENST00000519048.1|ENSG00000253926.1|OTTHUMG00000164849.1|OTTHUMT00000380583.1|RP11-26E5.1-001|RP11-26E5.1|281|	ENSMUST00000192766.1|ENSMUSG00000103836.1|OTTMUSG00000047307.1|OTTMUST00000122304.1|Gm37615-001|Gm37615|225|	281	225	0.133254	0.00139769	0	0	0	0	0	1	1	0	0	0	0	0	0	0
ENST00000564287.2|ENSG00000260805.2|OTTHUMG00000186548.2|OTTHUMT00000473326.2|RP11-61J19.5-001|RP11-61J19.5|1899|	ENSMUST00000192407.1|ENSMUSG00000097845.2|OTTMUSG00000051406.1|OTTMUST00000129961.1|A230020J21Rik-001|A230020J21Rik|1649|	1899	1649	0.133191	0.00140358	1	0	1	1	0	0	3	1	0	1	1	0	0	3
ENST00000445461.6|ENSG00000215386.11|OTTHUMG00000074377.4|OTTHUMT00000158034.2|MIR99AHG-006|MIR99AHG|710|	ENSMUST00000170849.7|ENSMUSG00000090386.9|OTTMUSG00000043459.2|OTTMUST00000113992.1|Mir99ahg-005|Mir99ahg|2176|	710	2176	0.133091	0.00141309	0	0	0	0	0	0	0	0	0	0	0	0	0	0
ENST00000414927.5|ENSG00000223774.5|OTTHUMG00000035808.1|OTTHUMT00000087099.1|RP11-307B6.3-001|RP11-307B6.3|494|	ENSMUST00000183317.7|ENSMUSG00000097993.7|OTTMUSG00000043508.4|OTTMUST00000114101.2|Ptprv-001|Ptprv|6108|	494	6108	0.132959	0.0014257	0	0	0	0	0	0	0	0	0	3	1	2	0	6
ENST00000504773.1|ENSG00000249007.1|OTTHUMG00000040657.1|OTTHUMT00000097761.1|RP11-510N19.5-001|RP11-510N19.5|987|	ENSMUST00000183317.7|ENSMUSG00000097993.7|OTTMUSG00000043508.4|OTTMUST00000114101.2|Ptprv-001|Ptprv|6108|	987	6108	0.132698	0.00145093	0	0	0	0	0	0	0	0	0	3	1	2	0	6
ENST00000506386.1|ENSG00000248373.5|OTTHUMG00000161051.1|OTTHUMT00000363584.1|RP11-556I14.1-002|RP11-556I14.1|541|	ENSMUST00000193574.1|ENSMUSG00000102530.1|OTTMUSG00000047661.1|OTTMUST00000122837.1|Gm37228-001|Gm37228|331|	541	331	0.132642	0.00145632	0	0	0	0	0	0	0	0	0	0	0	0	0	0
ENST00000622438.1|ENSG00000273618.1|OTTHUMG00000187059.1|OTTHUMT00000474351.1|RP11-66N24.7-001|RP11-66N24.7|1686|	ENSMUST00000176872.2|ENSMUSG00000100162.1|OTTMUSG00000049452.1|OTTMUST00000126071.1|Gm20687-001|Gm20687|1249|	1686	1249	0.132583	0.00146214	0	0	2	4	0	0	6	0	0	1	1	0	0	2
ENST00000422977.1|ENSG00000221817.9|OTTHUMG00000018470.6|OTTHUMT00000048665.1|PPP3CB-AS1-002|PPP3CB-AS1|930|	ENSMUST00000128848.7|ENSMUSG00000084925.7|OTTMUSG00000025217.1|OTTMUST00000062074.1|1810062O18Rik-004|1810062O18Rik|745|	930	745	0.132482	0.00147213	0	0	1	1	0	0	2	0	0	1	1	0	0	2
ENST00000624656.1|ENSG00000279833.1|OTTHUMG00000189207.1|OTTHUMT00000479038.1|RP4-742C19.13-001|RP4-742C19.13|3671|	ENSMUST00000128342.1|ENSMUSG00000087543.1|OTTMUSG00000034300.1|OTTMUST00000087224.1|Gm16576-001|Gm16576|5404|	3671	5404	0.132114	0.00150882	0	0	4	3	0	0	7	0	0	2	2	0	0	4
ENST00000605886.1|ENSG00000272405.1|OTTHUMG00000185554.1|OTTHUMT00000470702.1|RP11-284F21.10-001|RP11-284F21.10|3222|	ENSMUST00000180555.1|ENSMUSG00000097428.1|OTTMUSG00000042914.1|OTTMUST00000112724.1|AW047730-001|AW047730|984|	3222	984	0.131977	0.00152275	0	0	5	1	0	1	7	1	0	1	1	0	0	3
ENST00000454401.1|ENSG00000236822.1|OTTHUMG00000015705.1|OTTHUMT00000042481.1|RP11-137J7.2-001|RP11-137J7.2|222|	ENSMUST00000181479.1|ENSMUSG00000096963.1|OTTMUSG00000046534.1|OTTMUST00000121060.1|B230364G03Rik-001|B230364G03Rik|1374|	222	1374	0.13183	0.00153781	0	0	1	1	0	0	2	0	0	1	0	0	1	2
ENST00000626781.1|ENSG00000280486.1|OTTHUMG00000186820.2|OTTHUMT00000480405.1|LLNLR-307A6.1-002|LLNLR-307A6.1|1366|	ENSMUST00000168521.1|ENSMUSG00000091994.1|OTTMUSG00000035443.1|OTTMUST00000090654.1|E130317F20Rik-001|E130317F20Rik|3265|	1366	3265	0.131742	0.00154687	0	1	0	0	2	0	3	0	0	0	1	0	0	1
ENST00000555732.1|ENSG00000258584.1|OTTHUMG00000171296.1|OTTHUMT00000412838.1|FAM181A-AS1-003|FAM181A-AS1|258|	ENSMUST00000191414.1|ENSMUSG00000100789.6|OTTMUSG00000047116.1|OTTMUST00000121930.1|Gm29508-001|Gm29508|710|	258	710	0.131591	0.00156262	0	0	0	0	0	0	0	0	0	1	1	0	0	2
ENST00000560208.1|ENSG00000245694.9|OTTHUMG00000172236.3|OTTHUMT00000417438.1|CRNDE-006|CRNDE|735|	ENSMUST00000034183.9|ENSMUSG00000031736.11|OTTMUSG00000042411.2|OTTMUST00000111814.1|Crnde-001|Crnde|1238|	735	1238	0.131374	0.00158538	0	0	1	1	0	0	2	0	0	1	1	0	0	2
ENST00000592893.1|ENSG00000266978.1|OTTHUMG00000180401.1|OTTHUMT00000451205.1|CTD-2369P2.5-001|CTD-2369P2.5|918|	ENSMUST00000180870.1|ENSMUSG00000097535.1|-|-|Gm26592-201|Gm26592|1730|	918	1730	0.131313	0.00159181	0	0	1	1	0	0	2	0	0	0	2	0	0	2
ENST00000565882.1|ENSG00000261334.1|OTTHUMG00000175667.1|OTTHUMT00000430763.1|RP11-65J3.14-001|RP11-65J3.14|1934|	ENSMUST00000147959.1|ENSMUSG00000087268.1|OTTMUSG00000016802.1|OTTMUST00000040797.1|Gm14486-002|Gm14486|598|	1934	598	0.131265	0.00159697	1	0	4	2	0	0	7	1	0	1	1	0	0	3
ENST00000454066.1|ENSG00000223770.5|OTTHUMG00000154779.1|OTTHUMT00000337034.1|AC006145.4-002|AC006145.4|940|	ENSMUST00000198482.1|ENSMUSG00000104886.1|OTTMUSG00000055297.1|OTTMUST00000136900.1|Gm43000-001|Gm43000|3343|	940	3343	0.131234	0.0016003	0	0	0	0	0	0	0	2	0	0	0	0	1	3
ENST00000452429.5|ENSG00000225783.6|OTTHUMG00000150985.4|OTTHUMT00000320811.1|MIAT-016|MIAT|894|	ENSMUST00000182509.7|ENSMUSG00000097767.8|OTTMUSG00000043202.1|OTTMUST00000113302.1|Miat-003|Miat|737|	894	737	0.131107	0.00161392	0	0	0	0	0	1	1	0	0	1	1	0	0	2
ENST00000510176.1|ENSG00000250379.1|OTTHUMG00000160228.1|OTTHUMT00000359760.1|RP11-23P13.4-001|RP11-23P13.4|585|	ENSMUST00000141511.1|ENSMUSG00000087458.1|OTTMUSG00000015282.1|OTTMUST00000036214.1|Gm13999-001|Gm13999|969|	585	969	0.130893	0.00163704	0	0	0	1	0	0	1	0	0	0	0	0	0	0
ENST00000559804.1|ENSG00000232907.7|OTTHUMG00000032391.4|OTTHUMT00000417902.1|DLGAP4-AS1-003|DLGAP4-AS1|668|	ENSMUST00000149275.2|ENSMUSG00000087179.8|OTTMUSG00000016036.2|OTTMUST00000038244.2|Gm14230-002|Gm14230|388|	668	388	0.130606	0.00166865	0	0	1	0	0	0	1	0	0	0	0	0	0	0
ENST00000567261.1|ENSG00000261320.1|OTTHUMG00000175505.1|OTTHUMT00000430308.1|RP11-297D21.2-001|RP11-297D21.2|475|	ENSMUST00000182046.1|ENSMUSG00000098120.1|OTTMUSG00000043506.1|OTTMUST00000114099.1|Gm5914-002|Gm5914|332|	475	332	0.130424	0.00168887	0	0	1	1	0	0	2	0	0	0	0	0	0	0
ENST00000623341.1|ENSG00000280419.1|OTTHUMG00000176298.1|OTTHUMT00000431734.1|RP11-178L8.6-001|RP11-178L8.6|685|	ENSMUST00000181679.2|ENSMUSG00000097424.2|OTTMUSG00000043030.2|OTTMUST00000112943.2|1700030M09Rik-001|1700030M09Rik|964|	685	964	0.130366	0.00169545	0	0	0	1	0	0	1	0	0	2	1	0	0	3
ENST00000509873.5|ENSG00000251600.5|OTTHUMG00000161311.2|OTTHUMT00000364498.1|RP11-673E1.1-001|RP11-673E1.1|1303|	ENSMUST00000209804.1|ENSMUSG00000110142.1|OTTMUSG00000061337.1|OTTMUST00000149670.1|RP23-434H18.1-001|RP23-434H18.1|1584|	1303	1584	0.130338	0.00169856	0	0	0	0	0	0	0	0	0	0	0	0	0	0
ENST00000624188.1|ENSG00000279050.1|OTTHUMG00000176879.1|OTTHUMT00000434200.1|PWAR1-001|PWAR1|2414|	ENSMUST00000207194.1|ENSMUSG00000109362.1|OTTMUSG00000058957.1|OTTMUST00000144650.1|Gm44562-001|Gm44562|1347|	2414	1347	0.129931	0.00174509	0	0	0	0	0	0	0	0	0	0	0	0	0	0
ENST00000451946.1|ENSG00000226426.1|OTTHUMG00000018322.1|OTTHUMT00000048267.1|RP11-174J11.1-001|RP11-174J11.1|622|	ENSMUST00000189480.1|ENSMUSG00000101338.1|OTTMUSG00000047466.1|OTTMUST00000122526.1|Gm28139-001|Gm28139|643|	622	643	0.129919	0.00174646	0	0	0	0	0	0	0	0	0	0	0	0	0	0
ENST00000610769.1|ENSG00000274993.1|OTTHUMG00000157043.3|OTTHUMT00000347241.3|RP11-395B7.2-002|RP11-395B7.2|1955|	ENSMUST00000197762.1|ENSMUSG00000106237.1|OTTMUSG00000054538.1|OTTMUST00000135200.1|Gm8066-001|Gm8066|485|	1955	485	0.129858	0.0017536	1	0	3	1	0	0	5	0	0	1	1	0	0	2
ENST00000434786.2|ENSG00000281195.1|OTTHUMG00000189547.1|OTTHUMT00000327430.2|ZNF638-IT1-001|ZNF638-IT1|1615|	ENSMUST00000204953.1|ENSMUSG00000107534.1|OTTMUSG00000057648.1|OTTMUST00000141674.1|Gm43920-001|Gm43920|2159|	1615	2159	0.129824	0.00175749	1	0	0	0	0	0	1	1	1	0	0	0	2	4
ENST00000578387.1|ENSG00000251359.4|OTTHUMG00000160677.1|OTTHUMT00000361702.1|WWC2-AS2-001|WWC2-AS2|2183|	ENSMUST00000211481.1|ENSMUSG00000074357.3|OTTMUSG00000061494.1|OTTMUST00000150044.1|AA386476-001|AA386476|1067|	2183	1067	0.129778	0.00176285	1	0	1	4	0	0	6	0	0	1	2	0	0	3
ENST00000528872.1|ENSG00000255525.1|OTTHUMG00000166210.1|OTTHUMT00000388393.1|RP1-296L11.1-001|RP1-296L11.1|576|	ENSMUST00000187484.1|ENSMUSG00000100156.1|OTTMUSG00000045559.1|OTTMUST00000119408.1|Gm29053-001|Gm29053|370|	576	370	0.129562	0.00178828	0	0	0	0	0	0	0	0	0	0	0	0	0	0
ENST00000587312.1|ENSG00000267727.1|OTTHUMG00000180733.1|OTTHUMT00000450853.1|CTD-2540B15.7-001|CTD-2540B15.7|482|	ENSMUST00000205799.1|ENSMUSG00000108624.1|OTTMUSG00000058154.1|OTTMUST00000142808.1|Gm45091-001|Gm45091|504|	482	504	0.128889	0.0018696	1	0	0	0	0	0	1	0	0	2	2	0	0	4
ENST00000547465.1|ENSG00000257859.1|OTTHUMG00000169725.1|OTTHUMT00000405600.1|CASC18-002|CASC18|557|	ENSMUST00000195828.1|ENSMUSG00000104317.1|OTTMUSG00000047462.1|OTTMUST00000122521.1|Gm37908-001|Gm37908|470|	557	470	0.128759	0.00188573	0	0	0	0	0	0	0	0	0	0	0	0	0	0
ENST00000547395.1|ENSG00000257913.2|OTTHUMG00000170405.2|OTTHUMT00000408942.1|RP11-386G11.5-004|RP11-386G11.5|858|	ENSMUST00000181510.1|ENSMUSG00000097414.1|-|-|B130046B21Rik-201|B130046B21Rik|2216|	858	2216	0.128626	0.0019023	0	0	0	2	0	0	2	0	0	1	0	0	0	1
ENST00000424980.5|ENSG00000233086.7|OTTHUMG00000020070.4|OTTHUMT00000052782.1|RP11-375O18.2-001|RP11-375O18.2|328|	ENSMUST00000193515.1|ENSMUSG00000103488.1|OTTMUSG00000047868.1|OTTMUST00000123136.1|Gm37997-001|Gm37997|267|	328	267	0.128543	0.00191277	0	0	0	0	0	0	0	0	0	0	0	0	0	0
ENST00000504552.5|ENSG00000250447.5|OTTHUMG00000162282.1|OTTHUMT00000368422.1|CTD-2081C10.1-001|CTD-2081C10.1|1003|	ENSMUST00000195644.1|ENSMUSG00000104314.1|OTTMUSG00000047341.1|OTTMUST00000122349.1|Gm37907-001|Gm37907|846|	1003	846	0.128513	0.00191659	0	0	0	0	0	0	0	0	0	0	0	0	0	0
ENST00000426549.1|ENSG00000228363.2|OTTHUMG00000153204.3|OTTHUMT00000330038.2|AC015971.2-001|AC015971.2|1948|	ENSMUST00000204222.1|ENSMUSG00000108278.1|OTTMUSG00000057947.1|OTTMUST00000142254.1|Gm44194-001|Gm44194|3229|	1948	3229	0.128432	0.00192676	0	0	0	0	0	1	1	2	0	0	0	0	3	5
ENST00000609356.1|ENSG00000273449.1|OTTHUMG00000186411.1|OTTHUMT00000473111.1|RP11-218F10.3-001|RP11-218F10.3|927|	ENSMUST00000140669.1|ENSMUSG00000085109.1|OTTMUSG00000020623.1|OTTMUST00000048860.1|Gm15356-001|Gm15356|2741|	927	2741	0.128265	0.00194811	1	0	0	0	0	1	2	0	0	0	0	0	1	1
ENST00000609998.1|ENSG00000273151.1|OTTHUMG00000185874.1|OTTHUMT00000471588.1|RP11-449P15.2-001|RP11-449P15.2|6758|	ENSMUST00000151512.1|ENSMUSG00000086873.1|OTTMUSG00000025149.1|OTTMUST00000061871.1|Gm15672-001|Gm15672|1354|	6758	1354	0.128209	0.00195525	0	0	2	2	0	0	4	0	0	0	1	0	0	1
ENST00000562568.1|ENSG00000260600.1|OTTHUMG00000175403.1|OTTHUMT00000429879.1|RP11-109D24.1-001|RP11-109D24.1|1995|	ENSMUST00000209893.1|ENSMUSG00000109775.1|OTTMUSG00000061387.1|OTTMUST00000149782.1|RP24-439K22.1-001|RP24-439K22.1|3483|	1995	3483	0.128153	0.00196253	1	0	0	0	0	1	2	1	0	2	1	1	2	7
ENST00000449772.1|ENSG00000225765.1|OTTHUMG00000153049.1|OTTHUMT00000329241.1|AC068535.3-001|AC068535.3|493|	ENSMUST00000191125.1|ENSMUSG00000101919.1|OTTMUSG00000047517.1|OTTMUST00000122602.1|Gm29664-001|Gm29664|463|	493	463	0.127951	0.00198874	0	0	0	0	0	1	1	0	0	0	0	0	0	0
ENST00000453572.1|ENSG00000232184.1|OTTHUMG00000039995.1|OTTHUMT00000096484.1|RP11-370K11.1-001|RP11-370K11.1|389|	ENSMUST00000195379.1|ENSMUSG00000103646.1|OTTMUSG00000050333.1|OTTMUST00000127786.1|Gm37706-001|Gm37706|2765|	389	2765	0.127927	0.00199193	0	0	0	0	0	0	0	2	0	1	0	0	2	5
ENST00000554894.5|ENSG00000272888.5|OTTHUMG00000149845.9|OTTHUMT00000415068.1|LINC01578-006|LINC01578|556|	ENSMUST00000169090.1|ENSMUSG00000091890.2|OTTMUSG00000058372.1|-|A830073O21Rik-201|A830073O21Rik|2025|	556	2025	0.127813	0.00200686	1	1	1	1	0	0	4	0	0	3	1	0	0	4
ENST00000589518.1|ENSG00000233483.2|OTTHUMG00000180198.2|OTTHUMT00000450933.1|CTD-2020K17.4-004|CTD-2020K17.4|393|	ENSMUST00000139621.1|ENSMUSG00000078635.3|OTTMUSG00000003048.1|OTTMUST00000006258.1|1700028N14Rik-001|1700028N14Rik|747|	393	747	0.12746	0.00205384	0	0	0	0	0	0	0	2	0	1	0	0	0	3
ENST00000470024.1|ENSG00000242790.1|OTTHUMG00000158468.1|OTTHUMT00000351106.1|RP11-451G4.3-001|RP11-451G4.3|444|	ENSMUST00000194630.1|ENSMUSG00000102883.1|OTTMUSG00000047599.1|OTTMUST00000122738.1|Gm37279-001|Gm37279|338|	444	338	0.127343	0.00206968	0	0	0	0	0	0	0	0	0	0	0	0	0	0
ENST00000573609.2|ENSG00000262528.2|OTTHUMG00000177339.2|OTTHUMT00000436333.2|LA16c-349E10.1-001|LA16c-349E10.1|1417|	ENSMUST00000148064.1|ENSMUSG00000084862.1|OTTMUSG00000033061.1|OTTMUST00000082561.1|Gm16278-001|Gm16278|2071|	1417	2071	0.127093	0.00210385	0	0	1	2	0	0	3	0	0	2	2	0	0	4
ENST00000562796.1|ENSG00000260059.1|OTTHUMG00000176215.1|OTTHUMT00000431639.1|RP11-231E19.1-001|RP11-231E19.1|2764|	ENSMUST00000192063.1|ENSMUSG00000102704.1|OTTMUSG00000011466.1|OTTMUST00000026815.1|Gm38309-001|Gm38309|1518|	2764	1518	0.127054	0.00210914	1	0	0	0	0	3	4	0	0	0	0	0	1	1
ENST00000590076.2|ENSG00000267395.5|OTTHUMG00000182333.2|OTTHUMT00000460567.2|AC074212.6-001|AC074212.6|730|	ENSMUST00000181954.1|ENSMUSG00000097038.1|-|-|Gm26821-201|Gm26821|2652|	730	2652	0.126919	0.0021279	0	0	1	1	0	0	2	0	0	1	0	0	0	1
ENST00000503611.5|ENSG00000248429.5|OTTHUMG00000161654.6|OTTHUMT00000365616.3|RP11-597D13.9-001|RP11-597D13.9|2917|	ENSMUST00000195082.1|ENSMUSG00000102191.1|OTTMUSG00000052195.1|OTTMUST00000131149.1|Gm36569-001|Gm36569|965|	2917	965	0.12687	0.00213469	2	0	2	1	1	2	8	0	0	0	0	0	0	0
ENST00000426549.1|ENSG00000228363.2|OTTHUMG00000153204.3|OTTHUMT00000330038.2|AC015971.2-001|AC015971.2|1948|	ENSMUST00000204118.1|ENSMUSG00000107460.1|OTTMUSG00000057946.1|OTTMUST00000142252.1|Gm44186-001|Gm44186|2752|	1948	2752	0.126848	0.00213772	0	0	0	0	0	1	1	0	0	0	0	0	2	2
ENST00000397787.5|ENSG00000183535.9|OTTHUMG00000090401.3|OTTHUMT00000269033.2|COL18A1-AS1-002|COL18A1-AS1|3425|	ENSMUST00000180790.1|ENSMUSG00000097811.1|-|-|2810425M01Rik-201|2810425M01Rik|1850|	3425	1850	0.126617	0.00217025	0	0	1	1	0	0	2	0	0	1	1	0	0	2
ENST00000571933.1|ENSG00000260394.2|OTTHUMG00000172948.2|OTTHUMT00000440560.1|LA16c-313D11.9-002|LA16c-313D11.9|1220|	ENSMUST00000148064.1|ENSMUSG00000084862.1|OTTMUSG00000033061.1|OTTMUST00000082561.1|Gm16278-001|Gm16278|2071|	1220	2071	0.126523	0.00218365	0	0	0	2	0	0	2	0	0	2	2	0	0	4
ENST00000549659.1|ENSG00000258197.1|OTTHUMG00000187950.2|OTTHUMT00000409527.20|NKX2-2-AS1-001|NKX2-2-AS1|638|	ENSMUST00000136998.2|ENSMUSG00000086509.2|OTTMUSG00000015691.2|OTTMUST00000037295.2|Nkx2-2os-001|Nkx2-2os|4345|	638	4345	0.126388	0.00220291	0	1	1	0	0	0	2	0	1	1	0	0	1	3
ENST00000440181.5|ENSG00000231160.9|OTTHUMG00000160386.5|OTTHUMT00000360420.2|KLF3-AS1-001|KLF3-AS1|2368|	ENSMUST00000200143.1|ENSMUSG00000097640.7|OTTMUSG00000042861.3|OTTMUST00000137144.1|Gm20033-003|Gm20033|1460|	2368	1460	0.126252	0.00222258	0	0	1	0	0	1	2	1	0	3	2	0	0	6
ENST00000419450.1|ENSG00000229051.1|OTTHUMG00000009349.1|OTTHUMT00000025915.1|RP5-952N6.1-001|RP5-952N6.1|2086|	ENSMUST00000200255.1|ENSMUSG00000104597.1|OTTMUSG00000052765.2|OTTMUST00000132103.2|B230334C09Rik-001|B230334C09Rik|8927|	2086	8927	0.1262	0.00223013	0	0	0	0	0	0	0	1	1	2	1	0	2	7
ENST00000624372.1|ENSG00000279619.1|OTTHUMG00000182358.1|OTTHUMT00000460753.1|CTD-2527I21.5-001|CTD-2527I21.5|1936|	ENSMUST00000181958.1|ENSMUSG00000097149.1|OTTMUSG00000045675.1|OTTMUST00000119580.1|G630030J09Rik-001|G630030J09Rik|2135|	1936	2135	0.125886	0.00227617	0	0	2	2	1	0	5	0	0	2	2	1	1	6
ENST00000614316.1|ENSG00000278239.1|OTTHUMG00000188263.1|OTTHUMT00000476791.1|AC020956.3-001|AC020956.3|2265|	ENSMUST00000181552.1|ENSMUSG00000097017.1|OTTMUSG00000058401.1|OTTMUST00000143446.1|Gm26707-001|Gm26707|3902|	2265	3902	0.125787	0.00229085	3	1	0	0	0	2	6	1	0	1	1	0	1	4
ENST00000434516.1|ENSG00000224794.1|OTTHUMG00000153516.1|OTTHUMT00000331463.1|RP3-333H23.8-001|RP3-333H23.8|1778|	ENSMUST00000128342.1|ENSMUSG00000087543.1|OTTMUSG00000034300.1|OTTMUST00000087224.1|Gm16576-001|Gm16576|5404|	1778	5404	0.125696	0.00230446	0	0	1	0	0	0	1	0	0	2	2	0	0	4
ENST00000436413.5|ENSG00000232021.6|OTTHUMG00000161028.1|OTTHUMT00000363473.1|LEF1-AS1-001|LEF1-AS1|1045|	ENSMUST00000196419.1|ENSMUSG00000106086.1|OTTMUSG00000054767.1|OTTMUST00000135734.1|Gm43352-001|Gm43352|3065|	1045	3065	0.125226	0.0023758	0	0	1	0	0	0	1	2	0	2	3	0	0	7
ENST00000609107.1|ENSG00000272549.1|OTTHUMG00000185869.1|OTTHUMT00000471574.1|RP11-351J23.2-001|RP11-351J23.2|4569|	ENSMUST00000155166.1|ENSMUSG00000086465.1|OTTMUSG00000029529.1|OTTMUST00000073183.1|Gm16049-001|Gm16049|616|	4569	616	0.124958	0.0024175	0	0	2	1	0	0	3	0	0	0	0	0	0	0
ENST00000485974.1|ENSG00000244151.1|OTTHUMG00000158693.1|OTTHUMT00000351765.1|RP11-148K1.12-001|RP11-148K1.12|1230|	ENSMUST00000146326.7|ENSMUSG00000086769.7|OTTMUSG00000024081.2|OTTMUST00000058884.1|Gm15587-001|Gm15587|3493|	1230	3493	0.124951	0.0024186	0	1	0	1	0	0	2	0	0	0	0	0	0	0
ENST00000379677.2|ENSG00000205334.2|OTTHUMG00000151945.1|OTTHUMT00000324558.1|LINC01460-001|LINC01460|2860|	ENSMUST00000200956.1|ENSMUSG00000107352.1|OTTMUSG00000055472.1|OTTMUST00000137300.1|Gm43660-001|Gm43660|6548|	2860	6548	0.124949	0.00241887	1	0	1	0	0	0	2	1	0	2	0	1	1	5
ENST00000518947.6|ENSG00000254369.6|OTTHUMG00000158092.4|OTTHUMT00000350162.4|HOXA-AS3-001|HOXA-AS3|3992|	ENSMUST00000156515.8|ENSMUSG00000086427.8|OTTMUSG00000018876.2|OTTMUST00000045405.2|Hoxa11os-006|Hoxa11os|2118|	3992	2118	0.124927	0.00242228	1	0	2	1	1	1	6	0	0	2	0	1	0	3
ENST00000518376.1|ENSG00000249375.7|OTTHUMG00000164870.2|OTTHUMT00000380689.1|CASC11-002|CASC11|872|	ENSMUST00000192740.1|ENSMUSG00000103610.1|OTTMUSG00000047308.1|OTTMUST00000122305.1|Gm37947-001|Gm37947|894|	872	894	0.124861	0.00243271	0	0	0	0	0	0	0	0	0	1	0	0	0	1
ENST00000616163.1|ENSG00000176868.2|OTTHUMG00000186801.1|OTTHUMT00000473806.1|RP11-334J6.7-001|RP11-334J6.7|2713|	ENSMUST00000128298.1|ENSMUSG00000086216.1|OTTMUSG00000012953.1|OTTMUST00000031159.1|Gm13610-001|Gm13610|951|	2713	951	0.124774	0.00244638	0	0	1	0	0	0	1	0	0	0	0	1	0	1
ENST00000609234.1|ENSG00000272969.1|OTTHUMG00000186305.1|OTTHUMT00000472817.1|RP11-528I4.2-001|RP11-528I4.2|778|	ENSMUST00000185173.1|ENSMUSG00000098449.1|OTTMUSG00000044860.1|OTTMUST00000117884.1|Gm7467-001|Gm7467|652|	778	652	0.124743	0.00245139	0	0	0	0	0	0	0	0	0	1	1	0	0	2
ENST00000416860.2|ENSG00000238164.6|OTTHUMG00000000818.3|OTTHUMT00000002185.2|RP3-395M20.8-001|RP3-395M20.8|3522|	ENSMUST00000136217.2|ENSMUSG00000085069.2|OTTMUSG00000010446.2|OTTMUST00000024317.2|Gm13111-001|Gm13111|3542|	3522	3542	0.12465	0.00246605	0	0	4	4	2	0	10	0	0	2	1	0	0	3
ENST00000500765.1|ENSG00000248019.2|OTTHUMG00000161035.1|OTTHUMT00000363504.1|FAM13A-AS1-002|FAM13A-AS1|3210|	ENSMUST00000173978.1|ENSMUSG00000092323.1|OTTMUSG00000042291.1|OTTMUST00000111265.1|BB365896-001|BB365896|3000|	3210	3000	0.124406	0.00250528	0	0	0	0	1	1	2	0	0	0	0	0	3	3
ENST00000460739.5|ENSG00000242808.7|OTTHUMG00000158186.4|OTTHUMT00000350422.1|SOX2-OT-004|SOX2-OT|609|	ENSMUST00000200092.1|ENSMUSG00000105265.4|OTTMUSG00000036967.3|OTTMUST00000095021.1|Sox2ot-005|Sox2ot|767|	609	767	0.124226	0.00253452	0	0	0	0	0	0	0	0	0	0	0	0	0	0
ENST00000506172.2|ENSG00000250397.2|OTTHUMG00000165720.1|OTTHUMT00000385945.1|RP11-1391J7.1-001|RP11-1391J7.1|2061|	ENSMUST00000211564.1|ENSMUSG00000073787.4|OTTMUSG00000036655.3|OTTMUST00000147399.1|Gm10575-004|Gm10575|2116|	2061	2116	0.124168	0.00254402	0	0	0	1	0	0	1	0	0	2	1	0	0	3
ENST00000604818.1|ENSG00000270659.1|OTTHUMG00000185233.1|OTTHUMT00000469919.1|RP11-105N14.1-001|RP11-105N14.1|690|	ENSMUST00000194308.1|ENSMUSG00000103402.1|OTTMUSG00000047177.1|OTTMUST00000122016.1|Gm37930-001|Gm37930|1886|	690	1886	0.123953	0.00257958	1	0	0	0	0	0	1	0	0	0	0	0	1	1
ENST00000563278.1|ENSG00000260274.1|OTTHUMG00000173067.1|OTTHUMT00000421999.1|RP11-817O13.8-001|RP11-817O13.8|1430|	ENSMUST00000125333.2|ENSMUSG00000086728.2|OTTMUSG00000033322.2|OTTMUST00000083616.1|Man2c1os-001|Man2c1os|1910|	1430	1910	0.123861	0.00259496	0	0	1	0	0	0	1	0	0	1	0	0	0	1
ENST00000625754.1|ENSG00000256806.4|OTTHUMG00000188340.2|-|C17orf100-201|C17orf100|492|	ENSMUST00000066087.3|ENSMUSG00000053574.4|OTTMUSG00000006097.3|-|4930563E22Rik-201|4930563E22Rik|3313|	492	3313	0.123861	0.00259501	0	0	1	1	0	0	2	0	0	1	1	0	0	2
ENST00000591739.1|ENSG00000228113.7|OTTHUMG00000153895.6|OTTHUMT00000459702.1|AC003991.3-004|AC003991.3|719|	ENSMUST00000146887.1|ENSMUSG00000086528.1|OTTMUSG00000025798.1|OTTMUST00000063534.1|Gm15731-001|Gm15731|2195|	719	2195	0.123787	0.00260726	0	0	0	0	0	0	0	0	0	0	0	1	1	2
ENST00000470348.1|ENSG00000229196.3|OTTHUMG00000157651.1|OTTHUMT00000349336.1|RP11-775D22.2-001|RP11-775D22.2|392|	ENSMUST00000194541.1|ENSMUSG00000103108.1|OTTMUSG00000042911.2|OTTMUST00000112720.2|Rncr4-001|Rncr4|2221|	392	2221	0.123634	0.00263315	0	0	0	1	0	0	1	0	0	4	5	0	0	9
ENST00000624511.1|ENSG00000279205.1|OTTHUMG00000176289.1|OTTHUMT00000431725.1|RP11-632P5.1-001|RP11-632P5.1|1624|	ENSMUST00000186411.1|ENSMUSG00000100303.1|OTTMUSG00000048729.2|OTTMUST00000124735.2|2600014E21Rik-001|2600014E21Rik|10303|	1624	10303	0.123295	0.00269123	0	0	0	0	0	1	1	1	1	2	1	0	3	8
ENST00000421157.1|ENSG00000238198.1|OTTHUMG00000012130.1|OTTHUMT00000033545.1|RP11-31F15.2-001|RP11-31F15.2|2459|	ENSMUST00000196766.1|ENSMUSG00000105199.1|OTTMUSG00000052927.1|OTTMUST00000132443.1|Gm43581-001|Gm43581|2864|	2459	2864	0.123209	0.00270614	0	0	0	0	0	0	0	1	0	0	0	0	1	2
ENST00000445551.1|ENSG00000237424.1|OTTHUMG00000007949.2|OTTHUMT00000021830.2|FOXD2-AS1-001|FOXD2-AS1|2509|	ENSMUST00000123272.1|ENSMUSG00000085399.7|OTTMUSG00000008590.1|OTTMUST00000019480.1|Foxd2os-002|Foxd2os|2908|	2509	2908	0.123104	0.00272438	0	0	2	2	1	0	5	0	0	1	0	0	0	1
ENST00000456363.1|ENSG00000238018.2|OTTHUMG00000152506.2|OTTHUMT00000326312.1|AC093110.3-001|AC093110.3|602|	ENSMUST00000186216.1|ENSMUSG00000101872.1|OTTMUSG00000046837.2|OTTMUST00000121484.2|Gm29237-001|Gm29237|448|	602	448	0.123084	0.00272789	0	0	0	0	0	0	0	0	0	0	0	0	0	0
ENST00000566954.1|ENSG00000260996.1|OTTHUMG00000175633.1|OTTHUMT00000430680.1|RP13-122B23.8-001|RP13-122B23.8|1854|	ENSMUST00000129723.1|ENSMUSG00000085830.1|OTTMUSG00000011935.1|OTTMUST00000028198.1|Grin1os-001|Grin1os|2891|	1854	2891	0.122959	0.00274977	1	0	2	2	0	0	5	0	0	3	3	2	0	8
ENST00000507337.1|ENSG00000248714.6|OTTHUMG00000161365.1|OTTHUMT00000364661.1|RP11-1079K10.3-003|RP11-1079K10.3|601|	ENSMUST00000155531.1|ENSMUSG00000086191.1|OTTMUSG00000001757.1|OTTMUST00000003505.1|Zfp652os-001|Zfp652os|537|	601	537	0.122666	0.00280201	0	0	0	1	0	0	1	0	0	1	2	0	0	3
ENST00000623426.1|ENSG00000280118.1|OTTHUMG00000176877.1|OTTHUMT00000434198.1|RP11-385H1.1-001|RP11-385H1.1|3897|	ENSMUST00000208469.1|ENSMUSG00000109575.1|OTTMUSG00000058963.1|OTTMUST00000144656.1|Gm44831-001|Gm44831|2989|	3897	2989	0.122635	0.00280751	2	0	0	0	0	1	3	0	0	0	0	0	1	1
ENST00000533531.1|ENSG00000235661.3|OTTHUMG00000191841.1|OTTHUMT00000490723.1|MIR670HG-001|MIR670HG|897|	ENSMUST00000211619.1|ENSMUSG00000075020.6|OTTMUSG00000014445.4|OTTMUST00000149470.1|Mir670hg-004|Mir670hg|819|	897	819	0.122408	0.00284851	0	0	0	0	0	0	0	0	0	0	0	0	1	1
ENST00000579045.1|ENSG00000266830.1|OTTHUMG00000179418.1|OTTHUMT00000446190.1|CTD-2008P7.8-001|CTD-2008P7.8|1553|	ENSMUST00000149865.1|ENSMUSG00000085747.1|OTTMUSG00000000132.1|OTTMUST00000000428.1|Slc13a2os-001|Slc13a2os|3627|	1553	3627	0.12198	0.00292764	0	0	0	1	0	0	1	0	0	0	0	0	0	0
ENST00000424569.1|ENSG00000233922.2|OTTHUMG00000090408.2|OTTHUMT00000206833.1|AL133493.2-001|AL133493.2|821|	ENSMUST00000194879.1|ENSMUSG00000102522.1|OTTMUSG00000047464.1|OTTMUST00000122523.1|Gm37782-001|Gm37782|678|	821	678	0.121878	0.00294658	0	0	0	0	0	0	0	0	0	0	0	0	0	0
ENST00000614896.4|ENSG00000249669.8|OTTHUMG00000163464.8|OTTHUMT00000474555.1|CARMN-012|CARMN|536|	ENSMUST00000182244.7|ENSMUSG00000097324.8|OTTMUSG00000044428.2|OTTMUST00000116977.1|Carmn-002|Carmn|988|	536	988	0.121542	0.00301046	0	0	1	0	0	0	1	0	0	0	1	0	0	1
ENST00000563601.1|ENSG00000260589.1|OTTHUMG00000176135.1|OTTHUMT00000431556.1|STAM-AS1-001|STAM-AS1|2595|	ENSMUST00000195416.1|ENSMUSG00000103926.1|OTTMUSG00000051028.1|OTTMUST00000129370.1|Gm37894-001|Gm37894|2599|	2595	2599	0.12153	0.00301277	0	0	0	0	1	0	1	0	0	0	0	0	1	1
ENST00000624220.1|ENSG00000279701.1|OTTHUMG00000167252.1|OTTHUMT00000393882.1|CTD-2028E8.2-001|CTD-2028E8.2|967|	ENSMUST00000208963.1|ENSMUSG00000109576.1|OTTMUSG00000059639.1|OTTMUST00000146236.1|Gm44704-001|Gm44704|1990|	967	1990	0.12124	0.00306885	0	0	0	0	0	0	0	0	0	0	0	0	2	2
ENST00000624124.1|ENSG00000278989.1|OTTHUMG00000167216.1|OTTHUMT00000393766.1|RP11-762L8.6-001|RP11-762L8.6|2359|	ENSMUST00000207029.1|ENSMUSG00000109498.1|OTTMUSG00000059753.1|OTTMUST00000146481.1|Gm45222-001|Gm45222|4307|	2359	4307	0.121051	0.00310593	0	0	0	0	0	1	1	3	0	1	0	0	3	7
ENST00000608402.1|ENSG00000272717.1|OTTHUMG00000186389.1|OTTHUMT00000473067.1|RP11-342I1.2-001|RP11-342I1.2|845|	ENSMUST00000180404.7|ENSMUSG00000097885.7|OTTMUSG00000051610.2|OTTMUST00000130269.2|5031434O11Rik-001|5031434O11Rik|3731|	845	3731	0.12089	0.00313791	0	0	1	1	0	0	2	0	0	2	2	0	2	6
ENST00000457756.1|ENSG00000227098.1|OTTHUMG00000154100.2|OTTHUMT00000333894.2|AC073636.1-002|AC073636.1|558|	ENSMUST00000193407.1|ENSMUSG00000102473.1|OTTMUSG00000047528.1|OTTMUST00000122630.1|Gm37243-001|Gm37243|595|	558	595	0.120747	0.00316638	0	0	0	0	0	0	0	0	0	0	0	0	0	0
ENST00000551271.5|ENSG00000251602.6|OTTHUMG00000170424.1|OTTHUMT00000409066.1|RP11-521B24.3-002|RP11-521B24.3|2279|	ENSMUST00000181436.1|ENSMUSG00000097476.1|-|-|Gm26583-201|Gm26583|3684|	2279	3684	0.120735	0.00316884	0	0	1	1	1	0	3	0	0	1	2	0	0	3
ENST00000456999.1|ENSG00000230690.1|OTTHUMG00000153057.1|OTTHUMT00000329252.1|AC013402.5-001|AC013402.5|561|	ENSMUST00000191992.1|ENSMUSG00000103106.1|OTTMUSG00000047475.1|OTTMUST00000122537.1|Gm37047-001|Gm37047|533|	561	533	0.120647	0.00318664	0	0	0	0	0	0	0	0	0	1	1	0	0	2
ENST00000569908.1|ENSG00000259905.5|OTTHUMG00000173077.4|OTTHUMT00000422094.1|PWRN1-009|PWRN1|1435|	ENSMUST00000209115.1|ENSMUSG00000109006.2|OTTMUSG00000059552.2|OTTMUST00000146070.1|B230209E15Rik-001|B230209E15Rik|1597|	1435	1597	0.120589	0.00319836	0	1	0	0	1	1	3	0	0	0	0	0	1	1
ENST00000453149.1|ENSG00000229380.1|OTTHUMG00000151415.1|OTTHUMT00000322541.1|AC147651.5-001|AC147651.5|572|	ENSMUST00000100518.2|ENSMUSG00000075585.3|OTTMUSG00000048600.1|-|6330403L08Rik-201|6330403L08Rik|5521|	572	5521	0.120409	0.00323502	0	0	0	0	0	0	0	1	0	7	7	0	0	15
ENST00000624115.1|ENSG00000279708.1|OTTHUMG00000173068.1|OTTHUMT00000422014.1|CTD-2335A18.2-001|CTD-2335A18.2|1537|	ENSMUST00000182937.7|ENSMUSG00000097023.8|OTTMUSG00000043217.2|OTTMUST00000113397.1|Mir9-3hg-005|Mir9-3hg|636|	1537	636	0.120382	0.00324047	0	0	3	3	0	0	6	0	0	1	0	0	0	1
ENST00000624065.1|ENSG00000279187.1|OTTHUMG00000177903.1|OTTHUMT00000439604.1|RP11-455O6.5-001|RP11-455O6.5|2482|	ENSMUST00000140273.1|ENSMUSG00000085636.1|OTTMUSG00000004108.1|OTTMUST00000009279.1|Gm11769-001|Gm11769|1657|	2482	1657	0.120267	0.00326433	0	0	1	2	0	0	3	1	0	2	1	0	0	4
ENST00000572590.1|ENSG00000263271.1|OTTHUMG00000177954.1|OTTHUMT00000439910.1|RP11-1055B8.8-001|RP11-1055B8.8|424|	ENSMUST00000145437.1|ENSMUSG00000075389.3|OTTMUSG00000004109.1|OTTMUST00000009281.1|2810410L24Rik-002|2810410L24Rik|646|	424	646	0.120223	0.00327324	0	0	0	0	0	0	0	0	0	1	2	0	0	3
ENST00000559843.1|ENSG00000259444.1|OTTHUMG00000171900.1|OTTHUMT00000415720.1|RP11-736N17.8-001|RP11-736N17.8|386|	ENSMUST00000181055.1|ENSMUSG00000097381.1|-|-|A230087F16Rik-201|A230087F16Rik|2098|	386	2098	0.120104	0.00329804	0	0	0	0	0	0	0	0	1	1	1	0	0	3
ENST00000634596.1|ENSG00000230623.4|OTTHUMG00000035719.3|OTTHUMT00000488035.1|RP11-469A15.2-002|RP11-469A15.2|1768|	ENSMUST00000193724.1|ENSMUSG00000104509.1|OTTMUSG00000049854.1|OTTMUST00000126962.1|Gm33994-001|Gm33994|2414|	1768	2414	0.120013	0.00331717	0	0	0	0	0	0	0	0	0	0	0	0	1	1
ENST00000503652.1|ENSG00000248127.1|OTTHUMG00000162399.1|OTTHUMT00000368746.1|CTC-235G5.3-001|CTC-235G5.3|691|	ENSMUST00000188138.1|ENSMUSG00000100475.1|OTTMUSG00000046954.1|OTTMUST00000121687.1|Gm29543-001|Gm29543|967|	691	967	0.119904	0.00334006	0	0	1	1	0	0	2	0	0	1	0	0	0	1
ENST00000624112.1|ENSG00000279400.1|OTTHUMG00000188131.1|OTTHUMT00000476248.1|CTD-2353F22.2-001|CTD-2353F22.2|2242|	ENSMUST00000195237.1|ENSMUSG00000103047.1|OTTMUSG00000046948.1|OTTMUST00000121678.1|Gm37310-001|Gm37310|2968|	2242	2968	0.119891	0.00334278	0	0	0	0	0	1	1	0	0	1	0	0	1	2
ENST00000606796.1|ENSG00000271857.1|OTTHUMG00000185755.1|OTTHUMT00000471161.1|RP1-244F24.1-001|RP1-244F24.1|927|	ENSMUST00000097320.2|ENSMUSG00000073394.4|OTTMUSG00000033513.1|OTTMUST00000084306.1|Runx2os1-001|Runx2os1|792|	927	792	0.119824	0.00335695	0	0	2	1	0	1	4	0	0	1	1	0	0	2
ENST00000417917.1|ENSG00000225285.1|OTTHUMG00000002915.2|OTTHUMT00000008260.1|RP4-758J18.10-002|RP4-758J18.10|634|	ENSMUST00000180784.1|ENSMUSG00000097728.1|-|-|Gm26840-201|Gm26840|2980|	634	2980	0.119813	0.00335918	0	0	2	2	0	0	4	0	0	3	1	0	0	4
ENST00000333854.2|ENSG00000182873.5|OTTHUMG00000001239.2|OTTHUMT00000003654.1|RP11-181G12.2-001|RP11-181G12.2|1253|	ENSMUST00000097750.2|ENSMUSG00000073686.2|OTTMUSG00000047135.1|OTTMUST00000121965.1|Gm10564-001|Gm10564|3113|	1253	3113	0.119777	0.0033668	0	0	0	1	0	0	1	0	0	3	3	0	0	6
ENST00000512246.5|ENSG00000237125.8|OTTHUMG00000160783.6|OTTHUMT00000362306.1|HAND2-AS1-012|HAND2-AS1|883|	ENSMUST00000186386.6|ENSMUSG00000100510.6|OTTMUSG00000046274.1|OTTMUST00000120641.1|AV026068-001|AV026068|802|	883	802	0.11949	0.00342846	0	0	0	0	0	0	0	0	0	1	0	0	0	1
ENST00000634635.1|ENSG00000226822.2|OTTHUMG00000011012.2|OTTHUMT00000488794.1|RP11-356N1.2-003|RP11-356N1.2|2439|	ENSMUST00000195936.1|ENSMUSG00000105638.1|OTTMUSG00000053197.1|OTTMUST00000132929.1|4930408K08Rik-001|4930408K08Rik|1436|	2439	1436	0.119342	0.00346049	1	0	0	1	0	1	3	0	0	0	0	0	1	1
ENST00000538190.2|ENSG00000205866.3|OTTHUMG00000057555.2|OTTHUMT00000473964.1|FAM99A-002|FAM99A|1989|	ENSMUST00000211351.1|ENSMUSG00000109958.1|OTTMUSG00000060199.1|OTTMUST00000147350.1|RP23-56A14.12-001|RP23-56A14.12|628|	1989	628	0.119334	0.00346236	0	0	2	1	1	0	4	0	0	1	1	0	0	2
ENST00000576215.1|ENSG00000263218.2|OTTHUMG00000177658.2|OTTHUMT00000438274.1|CTD-2561B21.7-001|CTD-2561B21.7|338|	ENSMUST00000139014.1|ENSMUSG00000043993.6|OTTMUSG00000004130.2|OTTMUST00000009324.2|2900052L18Rik-001|2900052L18Rik|1588|	338	1588	0.11931	0.0034676	0	0	1	1	0	0	2	0	0	1	1	0	0	2
ENST00000458296.1|ENSG00000204261.8|OTTHUMG00000140123.1|OTTHUMT00000276213.1|PSMB8-AS1-002|PSMB8-AS1|958|	ENSMUST00000168978.1|ENSMUSG00000092595.1|OTTMUSG00000037088.1|OTTMUST00000095471.1|Gm20427-001|Gm20427|3703|	958	3703	0.119121	0.00350895	0	0	0	1	0	0	1	1	0	1	0	0	0	2
ENST00000586962.1|ENSG00000267698.1|OTTHUMG00000181746.1|OTTHUMT00000457425.1|AC002116.7-001|AC002116.7|643|	ENSMUST00000146232.1|ENSMUSG00000094365.1|OTTMUSG00000042286.1|OTTMUST00000111253.1|Gm21982-001|Gm21982|3821|	643	3821	0.118942	0.00354869	0	0	0	0	0	0	0	0	0	1	2	0	0	3
ENST00000561283.2|ENSG00000259362.2|OTTHUMG00000172610.2|OTTHUMT00000419437.2|RP11-307C19.1-001|RP11-307C19.1|3814|	ENSMUST00000181927.1|ENSMUSG00000097870.1|-|-|Gm26868-201|Gm26868|2653|	3814	2653	0.118934	0.00355054	1	0	1	0	0	1	3	0	0	0	0	0	0	0
ENST00000566529.1|ENSG00000261146.1|OTTHUMG00000175811.1|OTTHUMT00000431116.1|RP11-2A4.4-001|RP11-2A4.4|4706|	ENSMUST00000192569.1|ENSMUSG00000103407.1|OTTMUSG00000048241.1|OTTMUST00000123836.1|4930540E01Rik-001|4930540E01Rik|1146|	4706	1146	0.118931	0.00355121	0	0	1	0	0	1	2	0	0	1	0	0	1	2
ENST00000559802.1|ENSG00000259725.1|OTTHUMG00000172238.1|OTTHUMT00000417443.1|CTD-3032H12.1-001|CTD-3032H12.1|557|	ENSMUST00000034183.9|ENSMUSG00000031736.11|OTTMUSG00000042411.2|OTTMUST00000111814.1|Crnde-001|Crnde|1238|	557	1238	0.118694	0.00360432	0	0	1	0	0	0	1	0	0	1	1	0	0	2
ENST00000573602.1|ENSG00000261924.1|OTTHUMG00000177644.1|OTTHUMT00000438213.1|CTD-2561B21.5-002|CTD-2561B21.5|2091|	ENSMUST00000129379.1|ENSMUSG00000085207.1|OTTMUSG00000004051.1|OTTMUST00000009028.1|Gm11767-001|Gm11767|493|	2091	493	0.118658	0.00361248	0	1	1	0	0	0	2	0	0	0	0	0	0	0
ENST00000482019.1|ENSG00000240006.1|OTTHUMG00000159760.1|OTTHUMT00000357196.1|RP11-200A1.1-001|RP11-200A1.1|294|	ENSMUST00000191398.1|ENSMUSG00000100924.1|OTTMUSG00000047485.1|OTTMUST00000122548.1|Gm28621-001|Gm28621|260|	294	260	0.118492	0.00365036	0	0	1	1	0	0	2	0	0	1	1	0	0	2
ENST00000617888.1|ENSG00000278200.1|OTTHUMG00000186760.1|OTTHUMT00000473725.1|RP13-766D20.4-001|RP13-766D20.4|1048|	ENSMUST00000145437.1|ENSMUSG00000075389.3|OTTMUSG00000004109.1|OTTMUST00000009281.1|2810410L24Rik-002|2810410L24Rik|646|	1048	646	0.118439	0.00366251	1	1	2	1	0	0	5	0	0	1	2	0	0	3
ENST00000426467.1|ENSG00000226741.1|OTTHUMG00000150947.1|OTTHUMT00000320627.1|CTA-929C8.6-001|CTA-929C8.6|5052|	ENSMUST00000197648.1|ENSMUSG00000106060.1|OTTMUSG00000054313.1|OTTMUST00000134762.1|Gm42488-001|Gm42488|3225|	5052	3225	0.118293	0.0036962	0	0	3	2	1	0	6	0	0	0	0	0	0	0
ENST00000623111.1|ENSG00000279010.2|OTTHUMG00000189201.1|OTTHUMT00000479031.1|MIR6820-001|MIR6820|54538|	ENSMUST00000131710.7|ENSMUSG00000075555.11|OTTMUSG00000033510.1|OTTMUST00000084302.1|Gm10863-004|Gm10863|472|	54538	472	0.118292	0.00369646	5	2	21	19	4	11	62	0	0	0	0	0	0	0
ENST00000428828.1|ENSG00000241832.1|OTTHUMG00000150063.1|OTTHUMT00000316076.1|CECR3-001|CECR3|1915|	ENSMUST00000204159.1|ENSMUSG00000107580.1|OTTMUSG00000056825.1|OTTMUST00000140179.1|Gm44124-001|Gm44124|472|	1915	472	0.118246	0.00370707	0	0	1	1	0	1	3	0	0	1	1	0	0	2
ENST00000487977.1|ENSG00000203709.10|OTTHUMG00000036553.3|OTTHUMT00000088902.1|C1orf132-002|C1orf132|3197|	ENSMUST00000181947.7|ENSMUSG00000096929.7|OTTMUSG00000050888.1|OTTMUST00000128971.1|A330023F24Rik-002|A330023F24Rik|4632|	3197	4632	0.117756	0.00382245	0	0	0	0	0	2	2	0	0	0	0	0	2	2
ENST00000570786.1|ENSG00000263327.6|OTTHUMG00000160321.2|OTTHUMT00000439459.1|TAPT1-AS1-002|TAPT1-AS1|2165|	ENSMUST00000199282.1|ENSMUSG00000105247.1|OTTMUSG00000053975.1|OTTMUST00000134200.1|Gm42519-001|Gm42519|3656|	2165	3656	0.117684	0.00383981	0	0	0	0	0	2	2	5	1	0	0	0	8	14
ENST00000596045.1|ENSG00000269609.5|OTTHUMG00000182529.1|OTTHUMT00000462238.1|RPARP-AS1-006|RPARP-AS1|431|	ENSMUST00000187795.1|ENSMUSG00000100417.1|OTTMUSG00000047248.1|OTTMUST00000122163.1|Gm28578-003|Gm28578|664|	431	664	0.11763	0.00385277	1	0	1	1	0	0	3	0	0	1	1	0	0	2
ENST00000471357.1|ENSG00000243629.1|OTTHUMG00000158717.1|OTTHUMT00000351886.1|LINC00880-001|LINC00880|2018|	ENSMUST00000192502.1|ENSMUSG00000103440.1|OTTMUSG00000047600.2|OTTMUST00000122739.2|Gm37131-001|Gm37131|1561|	2018	1561	0.117584	0.00386388	0	0	0	1	0	0	1	0	0	0	0	0	0	0
ENST00000568633.1|ENSG00000260630.6|OTTHUMG00000173242.3|OTTHUMT00000430830.2|SNAI3-AS1-007|SNAI3-AS1|2096|	ENSMUST00000187142.1|ENSMUSG00000043903.3|OTTMUSG00000046182.1|OTTMUST00000120469.1|Gm22-001|Gm22|3082|	2096	3082	0.117557	0.00387036	0	0	0	1	0	0	1	0	0	2	3	0	0	5
ENST00000530918.2|ENSG00000254740.2|OTTHUMG00000166172.2|OTTHUMT00000467758.1|RP11-334E6.3-002|RP11-334E6.3|778|	ENSMUST00000174014.1|ENSMUSG00000092258.1|OTTMUSG00000037643.1|OTTMUST00000097136.1|Gm20444-001|Gm20444|729|	778	729	0.117544	0.00387342	0	0	1	1	0	0	2	0	0	2	2	0	0	4
ENST00000419450.1|ENSG00000229051.1|OTTHUMG00000009349.1|OTTHUMT00000025915.1|RP5-952N6.1-001|RP5-952N6.1|2086|	ENSMUST00000198192.1|ENSMUSG00000105201.1|OTTMUSG00000052736.1|OTTMUST00000132030.1|Gm43362-001|Gm43362|2470|	2086	2470	0.117447	0.00389686	0	0	0	0	0	0	0	1	0	0	0	0	0	1
ENST00000624065.1|ENSG00000279187.1|OTTHUMG00000177903.1|OTTHUMT00000439604.1|RP11-455O6.5-001|RP11-455O6.5|2482|	ENSMUST00000143428.1|ENSMUSG00000086924.1|OTTMUSG00000004050.1|OTTMUST00000009027.1|Gm11766-001|Gm11766|3018|	2482	3018	0.117333	0.00392474	0	0	1	2	0	0	3	0	0	2	2	0	0	4
ENST00000624424.1|ENSG00000280029.3|OTTHUMG00000189123.3|OTTHUMT00000478921.1|CH17-140K24.2-003|CH17-140K24.2|760|	ENSMUST00000097612.3|ENSMUSG00000073594.3|OTTMUSG00000050624.1|OTTMUST00000128346.1|Gm10545-001|Gm10545|4969|	760	4969	0.117306	0.00393143	1	0	0	0	0	0	1	0	0	1	0	0	2	3
ENST00000438755.1|ENSG00000197308.9|OTTHUMG00000156966.1|OTTHUMT00000346866.1|GATA3-AS1-003|GATA3-AS1|675|	ENSMUST00000131297.1|ENSMUSG00000086618.1|OTTMUSG00000011128.1|OTTMUST00000026062.1|Gm13256-001|Gm13256|520|	675	520	0.117206	0.00395601	0	0	0	0	0	0	0	1	0	1	1	0	0	3
ENST00000425449.1|ENSG00000228035.1|OTTHUMG00000011974.1|OTTHUMT00000033101.1|RP4-663N10.1-001|RP4-663N10.1|2610|	ENSMUST00000197999.1|ENSMUSG00000105855.1|OTTMUSG00000054696.1|OTTMUST00000135581.1|Gm42681-001|Gm42681|1611|	2610	1611	0.116855	0.0040432	0	0	0	0	0	1	1	0	0	1	0	0	2	3
ENST00000566366.1|ENSG00000261798.1|OTTHUMG00000175804.1|OTTHUMT00000431109.1|RP1-118J21.25-001|RP1-118J21.25|1196|	ENSMUST00000192482.1|ENSMUSG00000102997.1|OTTMUSG00000008933.2|OTTMUST00000020292.2|Gm17244-001|Gm17244|3416|	1196	3416	0.116744	0.00407123	0	0	1	1	0	0	2	0	0	2	4	1	0	7
ENST00000437916.2|ENSG00000259439.2|OTTHUMG00000172199.2|OTTHUMT00000417295.1|RP11-89K21.1-001|RP11-89K21.1|2880|	ENSMUST00000161146.9|ENSMUSG00000093460.9|OTTMUSG00000040061.5|OTTMUST00000083052.3|Six3os1-006|Six3os1|1265|	2880	1265	0.116611	0.00410516	0	0	1	1	0	1	3	0	0	2	2	0	0	4
ENST00000458253.5|ENSG00000233639.5|OTTHUMG00000153065.1|OTTHUMT00000329327.1|LINC01158-001|LINC01158|747|	ENSMUST00000181725.7|ENSMUSG00000060424.14|OTTMUSG00000039880.3|OTTMUST00000112078.2|Pantr1-008|Pantr1|615|	747	615	0.116577	0.00411374	0	0	0	0	0	0	0	0	0	1	0	0	0	1
ENST00000581471.2|ENSG00000263753.6|OTTHUMG00000178805.2|OTTHUMT00000443371.2|LINC00667-004|LINC00667|2034|	ENSMUST00000181032.1|ENSMUSG00000096988.1|OTTMUSG00000046180.1|OTTMUST00000120467.1|A930029G22Rik-001|A930029G22Rik|1710|	2034	1710	0.116326	0.00417822	0	0	2	1	0	0	3	1	0	3	2	0	0	6
ENST00000534909.2|ENSG00000248550.3|OTTHUMG00000171304.1|OTTHUMT00000412893.1|OTX2-AS1-001|OTX2-AS1|2428|	ENSMUST00000183522.7|ENSMUSG00000098682.7|OTTMUSG00000044647.1|OTTMUST00000117447.1|Otx2os1-002|Otx2os1|866|	2428	866	0.116308	0.00418311	2	0	0	0	1	3	6	0	0	0	0	0	0	0
ENST00000453529.2|ENSG00000236668.2|OTTHUMG00000020644.2|OTTHUMT00000054007.2|RP11-85O21.2-001|RP11-85O21.2|2146|	ENSMUST00000184325.1|ENSMUSG00000098383.1|OTTMUSG00000044442.1|OTTMUST00000117043.1|Gm27197-001|Gm27197|479|	2146	479	0.116208	0.00420897	0	0	1	1	0	0	2	0	0	0	0	0	0	0
ENST00000624587.1|ENSG00000279907.1|OTTHUMG00000175696.1|OTTHUMT00000430874.1|RP11-568J23.2-001|RP11-568J23.2|2492|	ENSMUST00000182423.1|ENSMUSG00000097983.1|OTTMUSG00000043112.1|OTTMUST00000113149.1|Gm26971-001|Gm26971|1072|	2492	1072	0.11613	0.00422928	0	0	0	0	0	0	0	0	0	1	1	1	0	3
ENST00000565336.1|ENSG00000260464.1|OTTHUMG00000175883.1|OTTHUMT00000431234.1|RP4-561L24.3-001|RP4-561L24.3|1766|	ENSMUST00000199060.1|ENSMUSG00000057359.7|OTTMUSG00000040076.3|OTTMUST00000131493.1|Gm17494-002|Gm17494|6844|	1766	6844	0.116048	0.00425097	1	0	1	1	0	0	3	3	0	2	3	0	1	9
ENST00000485071.2|ENSG00000274272.1|OTTHUMG00000187473.1|OTTHUMT00000475053.1|RP11-44M6.7-001|RP11-44M6.7|4401|	ENSMUST00000197965.1|ENSMUSG00000105851.1|OTTMUSG00000054537.1|OTTMUST00000135199.1|9130604C24Rik-001|9130604C24Rik|956|	4401	956	0.115721	0.0043378	2	0	5	7	3	0	17	0	0	0	1	0	0	1
ENST00000436880.2|ENSG00000229989.3|OTTHUMG00000035888.2|OTTHUMT00000087436.2|MIR181A1HG-003|MIR181A1HG|2308|	ENSMUST00000192140.1|ENSMUSG00000103038.1|OTTMUSG00000043192.1|OTTMUST00000113285.1|Gm37124-001|Gm37124|1992|	2308	1992	0.115284	0.00445654	0	0	0	0	0	0	0	0	0	0	0	0	4	4
ENST00000498940.1|ENSG00000245870.3|OTTHUMG00000160528.3|OTTHUMT00000361642.1|LINC00682-003|LINC00682|1625|	ENSMUST00000201816.1|ENSMUSG00000107319.1|OTTMUSG00000055785.2|OTTMUST00000138064.2|Gm42670-001|Gm42670|1292|	1625	1292	0.1152	0.00447951	1	0	1	1	0	0	3	1	0	2	1	0	0	4
ENST00000423600.1|ENSG00000229178.1|OTTHUMG00000155836.1|OTTHUMT00000341955.1|AC069513.4-001|AC069513.4|1684|	ENSMUST00000182690.1|ENSMUSG00000086645.2|OTTMUSG00000025888.3|OTTMUST00000116924.1|Gm15743-002|Gm15743|1901|	1684	1901	0.115195	0.00448107	2	0	1	0	0	1	4	1	0	3	2	0	0	6
ENST00000527035.1|ENSG00000254545.1|OTTHUMG00000165113.1|OTTHUMT00000381911.1|RP11-84A19.3-001|RP11-84A19.3|537|	ENSMUST00000147555.1|ENSMUSG00000085517.7|OTTMUSG00000009508.1|OTTMUST00000021722.1|Gm12963-003|Gm12963|649|	537	649	0.115156	0.00449178	0	0	2	1	0	0	3	0	0	1	2	0	0	3
ENST00000590513.2|ENSG00000266962.2|OTTHUMG00000180244.2|OTTHUMT00000450398.2|RP11-400F19.6-001|RP11-400F19.6|2313|	ENSMUST00000156205.1|ENSMUSG00000085083.1|OTTMUSG00000002760.1|OTTMUST00000005510.1|Gm11615-001|Gm11615|818|	2313	818	0.115006	0.00453353	0	0	3	3	0	0	6	0	0	0	0	0	0	0
ENST00000621095.1|ENSG00000275088.1|OTTHUMG00000187070.1|OTTHUMT00000474368.1|RP11-442O1.3-001|RP11-442O1.3|3306|	ENSMUST00000192004.1|ENSMUSG00000102737.1|OTTMUSG00000043044.1|OTTMUST00000112979.1|1700016A09Rik-001|1700016A09Rik|835|	3306	835	0.114821	0.0045854	0	0	3	4	1	0	8	0	0	2	1	0	0	3
ENST00000599259.1|ENSG00000269352.1|OTTHUMG00000183259.1|OTTHUMT00000465826.1|PTOV1-AS2-003|PTOV1-AS2|516|	ENSMUST00000141011.1|ENSMUSG00000087138.1|OTTMUSG00000023473.1|OTTMUST00000057109.1|Gm15545-001|Gm15545|899|	516	899	0.114754	0.00460435	0	0	1	1	0	0	2	0	0	1	1	0	0	2
ENST00000624451.1|ENSG00000278922.1|OTTHUMG00000176945.1|OTTHUMT00000434394.1|AC002310.14-001|AC002310.14|1377|	ENSMUST00000206759.1|ENSMUSG00000108806.1|OTTMUSG00000058500.1|OTTMUST00000143663.1|Gm44729-001|Gm44729|2052|	1377	2052	0.114695	0.00462117	0	0	2	2	0	0	4	0	0	0	2	0	0	2
ENST00000615078.1|ENSG00000277597.1|OTTHUMG00000186785.1|OTTHUMT00000473781.1|RP11-961A15.3-001|RP11-961A15.3|426|	ENSMUST00000209836.1|ENSMUSG00000109715.1|OTTMUSG00000060879.1|OTTMUST00000148786.1|RP23-384C18.12-001|RP23-384C18.12|2795|	426	2795	0.11469	0.00462238	0	1	1	1	0	0	3	1	0	3	4	0	0	8
ENST00000456981.1|ENSG00000237741.1|OTTHUMG00000022612.1|OTTHUMT00000058672.1|AC002368.4-001|AC002368.4|388|	ENSMUST00000154109.1|ENSMUSG00000086676.2|OTTMUSG00000017764.2|OTTMUST00000043019.1|Gm14705-001|Gm14705|1824|	388	1824	0.1146	0.004648	0	0	0	0	0	0	0	0	0	0	0	0	0	0
ENST00000437677.1|ENSG00000236208.1|OTTHUMG00000018189.1|OTTHUMT00000047982.1|C10orf71-AS1-001|C10orf71-AS1|753|	ENSMUST00000185335.1|ENSMUSG00000101086.1|OTTMUSG00000047057.1|OTTMUST00000121840.1|Gm28651-001|Gm28651|644|	753	644	0.114415	0.00470122	0	0	0	0	0	0	0	0	0	0	1	0	0	1
ENST00000454361.1|ENSG00000228689.7|OTTHUMG00000014839.5|OTTHUMT00000040891.2|RP3-335N17.2-001|RP3-335N17.2|610|	ENSMUST00000193790.1|ENSMUSG00000102597.1|OTTMUSG00000048279.1|OTTMUST00000123892.1|Gm38382-001|Gm38382|2499|	610	2499	0.114176	0.00477069	0	0	0	0	0	1	1	0	0	0	0	0	0	0
ENST00000451066.1|ENSG00000234141.1|OTTHUMG00000152026.1|OTTHUMT00000324926.1|AC009473.1-001|AC009473.1|692|	ENSMUST00000124104.7|ENSMUSG00000087305.8|OTTMUSG00000029348.6|OTTMUST00000072715.3|A430035B10Rik-001|A430035B10Rik|1350|	692	1350	0.114101	0.00479255	0	0	0	0	0	0	0	0	0	0	0	0	0	0
ENST00000415556.1|ENSG00000235296.1|OTTHUMG00000154387.1|OTTHUMT00000335007.1|AC137723.5-001|AC137723.5|691|	ENSMUST00000151998.1|ENSMUSG00000053613.6|OTTMUSG00000004079.1|OTTMUST00000009152.1|Notumos-001|Notumos|2659|	691	2659	0.114045	0.00480926	0	0	1	1	0	0	2	2	0	3	1	0	0	6
ENST00000561256.5|ENSG00000259248.5|OTTHUMG00000172432.2|OTTHUMT00000418519.1|USP3-AS1-009|USP3-AS1|562|	ENSMUST00000166507.1|ENSMUSG00000091745.1|OTTMUSG00000036129.2|OTTMUST00000092863.2|Gm17098-001|Gm17098|628|	562	628	0.114036	0.00481185	1	0	1	1	0	0	3	0	0	0	0	0	0	0
ENST00000582106.1|ENSG00000265688.1|OTTHUMG00000178435.1|OTTHUMT00000441951.1|MAFG-AS1-001|MAFG-AS1|1895|	ENSMUST00000193520.1|ENSMUSG00000102881.1|OTTMUSG00000042857.2|OTTMUST00000112638.2|Gm3807-001|Gm3807|1168|	1895	1168	0.11399	0.0048255	0	0	1	2	0	0	3	0	0	0	1	0	0	1
ENST00000623294.1|ENSG00000280233.1|OTTHUMG00000178778.1|OTTHUMT00000443323.1|RP11-159D12.3-001|RP11-159D12.3|581|	ENSMUST00000130442.1|ENSMUSG00000085872.1|OTTMUSG00000001440.1|OTTMUST00000002816.1|Gm11505-001|Gm11505|737|	581	737	0.11394	0.00484011	1	0	2	1	0	0	4	0	0	1	0	0	0	1
ENST00000592680.2|ENSG00000267213.4|OTTHUMG00000180221.2|OTTHUMT00000450306.2|AC007773.2-001|AC007773.2|972|	ENSMUST00000187873.1|ENSMUSG00000044997.3|OTTMUSG00000047537.1|OTTMUST00000122642.1|E130304I02Rik-001|E130304I02Rik|696|	972	696	0.113853	0.00486606	0	0	1	1	0	0	2	0	0	1	1	1	0	3
ENST00000554025.1|ENSG00000259119.1|OTTHUMG00000171474.1|OTTHUMT00000413592.1|RP11-1127D7.1-001|RP11-1127D7.1|1851|	ENSMUST00000144556.1|ENSMUSG00000085641.1|OTTMUSG00000019484.1|OTTMUST00000046515.1|4930465M20Rik-002|4930465M20Rik|541|	1851	541	0.113841	0.00486951	0	0	0	0	0	0	0	0	0	0	0	0	0	0
ENST00000518865.5|ENSG00000248690.6|OTTHUMG00000164965.2|OTTHUMT00000381213.1|HAS2-AS1-002|HAS2-AS1|577|	ENSMUST00000125401.7|ENSMUSG00000086541.8|OTTMUSG00000036746.1|OTTMUST00000094256.1|Has2os-001|Has2os|485|	577	485	0.113804	0.00488058	0	0	0	0	0	1	1	0	0	0	0	0	0	0
ENST00000624875.1|ENSG00000278893.1|OTTHUMG00000176437.1|OTTHUMT00000432076.1|RP11-229O3.1-001|RP11-229O3.1|2105|	ENSMUST00000210301.1|ENSMUSG00000110084.1|OTTMUSG00000061431.2|OTTMUST00000149906.2|RP24-424D1.5-001|RP24-424D1.5|3998|	2105	3998	0.113746	0.00489788	1	0	0	0	0	1	2	1	0	0	0	1	4	6
ENST00000596286.1|ENSG00000268739.1|OTTHUMG00000183145.1|OTTHUMT00000465227.1|CTC-518B2.12-001|CTC-518B2.12|240|	ENSMUST00000205527.1|ENSMUSG00000097178.7|OTTMUSG00000058537.1|OTTMUST00000143736.1|2310002F09Rik-004|2310002F09Rik|624|	240	624	0.113573	0.00495007	0	0	0	0	0	0	0	0	0	0	1	0	0	1
ENST00000585258.1|ENSG00000264278.1|OTTHUMG00000179330.1|OTTHUMT00000445773.1|RP11-162A12.2-001|RP11-162A12.2|1295|	ENSMUST00000181931.2|ENSMUSG00000097141.2|OTTMUSG00000044390.1|OTTMUST00000116849.1|Gm10524-001|Gm10524|1893|	1295	1893	0.11329	0.00503629	0	0	1	1	0	0	2	2	0	3	3	0	0	8
ENST00000550206.1|ENSG00000257359.1|OTTHUMG00000169647.1|OTTHUMT00000405257.1|RP11-780K2.1-001|RP11-780K2.1|570|	ENSMUST00000181905.1|ENSMUSG00000097368.2|OTTMUSG00000056240.1|OTTMUST00000138989.1|Gm10390-002|Gm10390|4269|	570	4269	0.113275	0.00504096	0	0	0	0	0	0	0	0	0	2	0	0	0	2
ENST00000397841.5|ENSG00000183250.11|OTTHUMG00000090294.3|OTTHUMT00000206644.1|LINC01547-002|LINC01547|2303|	ENSMUST00000180790.1|ENSMUSG00000097811.1|-|-|2810425M01Rik-201|2810425M01Rik|1850|	2303	1850	0.113056	0.00510876	0	0	1	2	0	0	3	0	0	1	1	0	0	2
ENST00000565581.1|ENSG00000261529.1|OTTHUMG00000176881.1|OTTHUMT00000434205.1|RP13-487P22.1-001|RP13-487P22.1|1603|	ENSMUST00000207667.1|ENSMUSG00000108886.1|OTTMUSG00000058960.1|OTTMUST00000144653.1|Gm44830-001|Gm44830|584|	1603	584	0.112965	0.00513711	3	0	0	0	0	3	6	2	0	0	0	0	0	2
ENST00000425510.1|ENSG00000272763.1|OTTHUMG00000185832.1|OTTHUMT00000471446.1|RP11-357H14.17-003|RP11-357H14.17|379|	ENSMUST00000150490.2|ENSMUSG00000078706.4|OTTMUSG00000001985.3|OTTMUST00000003987.2|Gm53-002|Gm53|3257|	379	3257	0.112779	0.0051957	0	0	0	1	0	0	1	0	0	0	1	0	0	1
ENST00000518481.1|ENSG00000253982.1|OTTHUMG00000163625.1|OTTHUMT00000374588.1|CTD-2336O2.1-003|CTD-2336O2.1|579|	ENSMUST00000192473.1|ENSMUSG00000102615.1|OTTMUSG00000044894.1|OTTMUST00000117984.1|Gm37844-001|Gm37844|4097|	579	4097	0.112454	0.00529943	1	0	0	0	0	0	1	0	0	5	3	0	0	8
ENST00000430651.1|ENSG00000227128.4|OTTHUMG00000170500.3|OTTHUMT00000049931.1|LBX1-AS1-006|LBX1-AS1|2553|	ENSMUST00000191181.1|ENSMUSG00000102057.1|OTTMUSG00000047251.1|OTTMUST00000122168.1|Gm29594-001|Gm29594|398|	2553	398	0.112369	0.00532697	0	0	3	4	1	0	8	0	0	1	1	0	0	2
ENST00000472494.1|ENSG00000243766.7|OTTHUMG00000063751.7|OTTHUMT00000469690.1|HOTTIP-005|HOTTIP|2285|	ENSMUST00000141300.1|ENSMUSG00000055408.7|OTTMUSG00000018874.1|OTTMUST00000045397.1|Hottip-001|Hottip|2346|	2285	2346	0.112332	0.00533878	2	0	1	2	0	0	5	0	0	1	0	0	0	1
ENST00000418574.3|ENSG00000255871.2|OTTHUMG00000168856.2|OTTHUMT00000401401.2|RP11-69C13.1-001|RP11-69C13.1|2178|	ENSMUST00000162868.1|ENSMUSG00000089957.2|OTTMUSG00000034609.2|OTTMUST00000087820.2|A830011K09Rik-002|A830011K09Rik|2201|	2178	2201	0.112317	0.00534385	0	0	0	0	0	0	0	0	0	0	0	0	0	0
ENST00000617183.1|ENSG00000275936.1|OTTHUMG00000187240.1|OTTHUMT00000474628.1|RP1-278C19.8-001|RP1-278C19.8|678|	ENSMUST00000202548.1|ENSMUSG00000107353.1|OTTMUSG00000056073.1|OTTMUST00000138640.1|4930430O22Rik-001|4930430O22Rik|579|	678	579	0.112244	0.00536729	0	0	1	2	0	0	3	0	0	1	0	0	0	1
ENST00000446578.1|ENSG00000182057.4|OTTHUMG00000150700.1|OTTHUMT00000319664.1|OGFRP1-003|OGFRP1|551|	ENSMUST00000186291.1|ENSMUSG00000100199.1|OTTMUSG00000048087.1|OTTMUST00000123550.1|Gm20324-001|Gm20324|1118|	551	1118	0.112236	0.00537009	0	0	0	1	0	0	1	0	0	1	1	0	0	2
ENST00000419080.1|ENSG00000226416.1|OTTHUMG00000012474.2|OTTHUMT00000034755.2|MRPL23-AS1-001|MRPL23-AS1|1876|	ENSMUST00000152754.7|ENSMUSG00000000031.15|OTTMUSG00000014998.2|OTTMUST00000072694.1|H19-005|H19|1853|	1876	1853	0.112211	0.00537804	0	0	2	3	0	0	5	0	0	2	1	0	1	4
ENST00000577537.5|ENSG00000233098.8|OTTHUMG00000178937.4|OTTHUMT00000444041.1|CCDC144NL-AS1-001|CCDC144NL-AS1|3727|	ENSMUST00000101077.2|ENSMUSG00000072847.4|OTTMUSG00000005844.2|-|A530017D24Rik-201|A530017D24Rik|2315|	3727	2315	0.111951	0.00546378	2	0	0	0	0	3	5	0	0	1	1	1	2	5
ENST00000616682.1|ENSG00000277559.1|OTTHUMG00000186932.1|OTTHUMT00000474041.1|RP11-434E6.4-001|RP11-434E6.4|1458|	ENSMUST00000191594.1|ENSMUSG00000099664.1|OTTMUSG00000049737.1|OTTMUST00000126688.1|Gm28511-001|Gm28511|450|	1458	450	0.111851	0.00549687	0	0	2	0	0	1	3	0	0	0	0	0	0	0
ENST00000603791.1|ENSG00000270504.1|OTTHUMG00000185108.1|OTTHUMT00000469606.1|RP11-420L9.5-001|RP11-420L9.5|2761|	ENSMUST00000154345.1|ENSMUSG00000086786.1|OTTMUSG00000027716.1|OTTMUST00000068590.1|Gm15908-001|Gm15908|1091|	2761	1091	0.111643	0.0055665	1	0	4	4	0	0	9	1	0	0	1	0	0	2
ENST00000499322.6|ENSG00000245213.6|OTTHUMG00000160808.1|OTTHUMT00000362411.1|RP11-10K16.1-003|RP11-10K16.1|1866|	ENSMUST00000210975.1|ENSMUSG00000110419.1|OTTMUSG00000060726.1|OTTMUST00000148449.1|RP23-383A10.9-002|RP23-383A10.9|1446|	1866	1446	0.11131	0.00567969	0	0	1	1	0	0	2	1	0	1	0	0	1	3
ENST00000621819.1|ENSG00000278840.1|OTTHUMG00000186728.1|OTTHUMT00000473678.1|RP11-345N11.1-001|RP11-345N11.1|340|	ENSMUST00000205580.1|ENSMUSG00000108597.1|OTTMUSG00000058878.1|OTTMUST00000144513.1|Gm44708-001|Gm44708|2237|	340	2237	0.111275	0.00569176	0	0	0	0	0	0	0	2	0	0	0	0	2	4
ENST00000523242.1|ENSG00000253959.1|OTTHUMG00000163339.1|OTTHUMT00000372783.1|CTB-43E15.1-001|CTB-43E15.1|494|	ENSMUST00000192490.1|ENSMUSG00000103635.1|OTTMUSG00000047432.1|OTTMUST00000122480.1|Gm38061-001|Gm38061|365|	494	365	0.111198	0.00571831	0	0	0	0	0	0	0	0	0	0	0	0	0	0
ENST00000601911.1|ENSG00000268262.1|OTTHUMG00000182810.1|OTTHUMT00000463837.1|CTC-246B18.8-001|CTC-246B18.8|877|	ENSMUST00000208885.1|ENSMUSG00000109455.1|OTTMUSG00000059055.1|OTTMUST00000144882.1|Gm44710-001|Gm44710|471|	877	471	0.110953	0.00580314	1	0	2	1	0	0	4	0	0	0	1	0	0	1
ENST00000623826.1|ENSG00000279844.1|OTTHUMG00000176253.1|OTTHUMT00000431681.1|RP11-20F18.1-001|RP11-20F18.1|1364|	ENSMUST00000146034.1|ENSMUSG00000075325.3|OTTMUSG00000012844.3|OTTMUST00000031383.2|Gm13582-001|Gm13582|2655|	1364	2655	0.11095	0.00580438	0	0	0	0	0	2	2	2	0	0	0	0	4	6
ENST00000624270.1|ENSG00000279259.1|OTTHUMG00000177539.2|OTTHUMT00000437458.2|RP11-334C17.3-001|RP11-334C17.3|1347|	ENSMUST00000181285.1|ENSMUSG00000097614.1|-|-|Gm26508-201|Gm26508|1516|	1347	1516	0.110656	0.00590819	1	1	0	1	0	1	4	1	0	1	0	0	0	2
ENST00000570167.1|ENSG00000260249.2|OTTHUMG00000173401.2|OTTHUMT00000422982.1|RP11-401P9.5-001|RP11-401P9.5|5214|	ENSMUST00000209918.1|ENSMUSG00000110187.1|OTTMUSG00000061475.1|OTTMUST00000150024.1|RP23-298O13.2-001|RP23-298O13.2|2917|	5214	2917	0.110594	0.00593004	0	0	0	2	0	0	2	0	1	0	0	0	0	1
ENST00000567102.1|ENSG00000260296.1|OTTHUMG00000176303.1|OTTHUMT00000431740.1|RP11-395I6.3-001|RP11-395I6.3|1157|	ENSMUST00000201573.1|ENSMUSG00000106713.1|OTTMUSG00000055238.1|OTTMUST00000136800.1|Gm42645-001|Gm42645|1627|	1157	1627	0.110543	0.00594814	1	0	0	0	0	0	1	0	0	0	0	0	1	1
ENST00000448433.5|ENSG00000204091.7|OTTHUMG00000014660.2|OTTHUMT00000040483.1|TDRG1-001|TDRG1|1015|	ENSMUST00000187177.6|ENSMUSG00000101012.6|OTTMUSG00000045095.2|OTTMUST00000118491.1|1700008K24Rik-005|1700008K24Rik|758|	1015	758	0.110499	0.00596392	0	0	1	0	0	0	1	0	0	0	0	0	0	0
ENST00000561327.5|ENSG00000255571.7|OTTHUMG00000171992.6|OTTHUMT00000416280.1|MIR9-3HG-007|MIR9-3HG|957|	ENSMUST00000035939.7|ENSMUSG00000039133.8|OTTMUSG00000044966.2|OTTMUST00000118174.2|9330171B17Rik-001|9330171B17Rik|2073|	957	2073	0.110282	0.00604219	0	0	1	1	0	0	2	0	0	1	1	0	0	2
ENST00000398461.5|ENSG00000214548.14|OTTHUMG00000029052.8|OTTHUMT00000104665.2|MEG3-011|MEG3|3452|	ENSMUST00000189236.1|ENSMUSG00000101767.1|OTTMUSG00000047122.1|OTTMUST00000121939.1|Gm28498-001|Gm28498|469|	3452	469	0.110239	0.006058	1	0	1	3	0	1	6	0	0	1	0	0	0	1
ENST00000565145.1|ENSG00000259799.1|OTTHUMG00000172974.1|OTTHUMT00000421557.1|RP11-554A11.9-001|RP11-554A11.9|500|	ENSMUST00000208788.1|ENSMUSG00000109305.1|OTTMUSG00000059416.2|OTTMUST00000145845.1|1810010D01Rik-001|1810010D01Rik|889|	500	889	0.110141	0.00609352	0	0	0	0	0	0	0	0	0	0	1	0	0	1
ENST00000517796.1|ENSG00000253960.1|OTTHUMG00000164235.1|OTTHUMT00000377886.1|RP11-388K12.1-001|RP11-388K12.1|532|	ENSMUST00000194728.1|ENSMUSG00000104211.1|OTTMUSG00000047704.1|OTTMUST00000122915.1|Gm37985-001|Gm37985|74456|	532	74456	0.110124	0.00609989	1	0	0	0	0	1	2	3	2	4	2	2	27	40
ENST00000426250.3|ENSG00000236333.3|OTTHUMG00000150370.3|OTTHUMT00000317877.3|TRHDE-AS1-002|TRHDE-AS1|3684|	ENSMUST00000139331.1|ENSMUSG00000084865.1|OTTMUSG00000025714.1|OTTMUST00000063327.1|Gm15723-001|Gm15723|600|	3684	600	0.110002	0.00614473	1	0	3	2	0	1	7	0	0	1	1	0	0	2
ENST00000567904.1|ENSG00000260360.1|OTTHUMG00000176152.1|OTTHUMT00000431573.1|RP11-533E19.5-001|RP11-533E19.5|1257|	ENSMUST00000193347.1|ENSMUSG00000102833.1|OTTMUSG00000050235.1|OTTMUST00000127620.1|Gm9694-001|Gm9694|1189|	1257	1189	0.109534	0.0063193	0	0	0	0	0	1	1	0	0	1	0	0	1	2
ENST00000455534.1|ENSG00000236703.1|OTTHUMG00000015627.2|OTTHUMT00000042345.2|MYB-AS1-001|MYB-AS1|449|	ENSMUST00000180680.1|ENSMUSG00000097923.1|OTTMUSG00000046560.1|OTTMUST00000121093.1|Gm26577-001|Gm26577|2184|	449	2184	0.109498	0.00633311	0	0	0	0	0	0	0	0	0	0	0	0	0	0
ENST00000635621.1|ENSG00000229425.2|OTTHUMG00000074333.3|OTTHUMT00000488672.1|AJ006998.2-005|AJ006998.2|1401|	ENSMUST00000208527.1|ENSMUSG00000109333.1|OTTMUSG00000059112.1|OTTMUST00000144984.1|Gm45028-002|Gm45028|809|	1401	809	0.109476	0.00634136	0	0	0	0	0	1	1	0	0	1	0	0	1	2
ENST00000572691.2|ENSG00000263072.6|OTTHUMG00000177518.2|OTTHUMT00000488599.1|ZNF213-AS1-011|ZNF213-AS1|3232|	ENSMUST00000180920.1|ENSMUSG00000097517.1|-|-|Gm26695-201|Gm26695|1251|	3232	1251	0.109342	0.0063923	0	0	2	1	0	0	3	0	0	1	1	0	0	2
ENST00000564401.1|ENSG00000259941.1|OTTHUMG00000176401.1|OTTHUMT00000431908.1|RP11-48G14.2-001|RP11-48G14.2|2465|	ENSMUST00000194508.1|ENSMUSG00000102411.1|OTTMUSG00000044730.1|OTTMUST00000117609.1|Gm36936-001|Gm36936|2749|	2465	2749	0.109279	0.0064163	0	0	0	0	0	1	1	0	0	0	0	0	1	1
ENST00000511073.1|ENSG00000249867.5|OTTHUMG00000163393.1|OTTHUMT00000373092.1|RP11-115J23.1-002|RP11-115J23.1|781|	ENSMUST00000156541.1|ENSMUSG00000086758.1|OTTMUSG00000015057.1|OTTMUST00000035759.1|Gm13912-001|Gm13912|1860|	781	1860	0.108904	0.00656134	0	0	0	0	0	0	0	0	0	0	0	0	0	0
ENST00000579003.1|ENSG00000265206.4|OTTHUMG00000178925.1|OTTHUMT00000443998.1|MIR142-001|MIR142|1625|	ENSMUST00000123700.1|ENSMUSG00000084796.1|OTTMUSG00000001327.1|OTTMUST00000002656.1|Mir142hg-001|Mir142hg|269|	1625	269	0.108677	0.00665093	0	0	0	0	0	0	0	0	0	0	0	0	0	0
ENST00000518623.5|ENSG00000251191.7|OTTHUMG00000163800.3|OTTHUMT00000375647.1|LINC00589-002|LINC00589|938|	ENSMUST00000211015.1|ENSMUSG00000110015.1|OTTMUSG00000061007.1|OTTMUST00000149088.1|RP24-155I9.2-001|RP24-155I9.2|1562|	938	1562	0.108353	0.00678014	0	0	0	0	0	0	0	0	0	0	0	0	0	0
ENST00000594810.2|ENSG00000241158.5|OTTHUMG00000158723.4|OTTHUMT00000351902.3|ADAMTS9-AS1-002|ADAMTS9-AS1|3609|	ENSMUST00000203992.1|ENSMUSG00000108256.1|OTTMUSG00000057908.1|OTTMUST00000142188.1|Gm43923-001|Gm43923|2911|	3609	2911	0.108342	0.00678463	1	0	1	1	0	1	4	1	0	0	0	0	1	2
ENST00000564401.1|ENSG00000259941.1|OTTHUMG00000176401.1|OTTHUMT00000431908.1|RP11-48G14.2-001|RP11-48G14.2|2465|	ENSMUST00000193900.1|ENSMUSG00000102925.1|OTTMUSG00000044790.3|OTTMUST00000117731.2|Gm37150-001|Gm37150|2754|	2465	2754	0.108322	0.00679269	0	0	0	0	0	1	1	0	0	1	1	0	0	2
ENST00000512873.1|ENSG00000249699.1|OTTHUMG00000161689.1|OTTHUMT00000365728.1|RP11-415C15.2-001|RP11-415C15.2|2802|	ENSMUST00000197424.1|ENSMUSG00000105912.1|OTTMUSG00000054965.1|OTTMUST00000136217.1|Gm10440-001|Gm10440|2753|	2802	2753	0.108222	0.00683327	0	0	0	0	0	1	1	0	0	1	0	0	2	3
ENST00000451250.1|ENSG00000231090.1|OTTHUMG00000008214.1|OTTHUMT00000022545.1|RP11-101C11.1-001|RP11-101C11.1|638|	ENSMUST00000195679.1|ENSMUSG00000104192.1|OTTMUSG00000047726.1|OTTMUST00000122940.1|Gm37253-001|Gm37253|562|	638	562	0.108212	0.00683704	0	0	0	0	0	0	0	0	0	1	0	0	0	1
ENST00000596276.1|ENSG00000268649.4|OTTHUMG00000183175.1|OTTHUMT00000465468.1|MIR296-001|MIR296|594|	ENSMUST00000143738.1|ENSMUSG00000086537.7|OTTMUSG00000016620.1|OTTMUST00000040200.1|Nespas-003|Nespas|1083|	594	1083	0.108054	0.00690144	0	0	2	0	0	0	2	1	1	1	0	0	0	3
ENST00000575743.1|ENSG00000262061.5|OTTHUMG00000177419.1|OTTHUMT00000436839.1|RP11-1260E13.4-004|RP11-1260E13.4|2252|	ENSMUST00000127424.7|ENSMUSG00000087059.7|OTTMUSG00000006218.1|OTTMUST00000014041.1|Gm12339-001|Gm12339|728|	2252	728	0.107963	0.00693909	0	0	1	1	0	0	2	1	0	1	1	0	0	3
ENST00000433869.1|ENSG00000230550.1|OTTHUMG00000036062.1|OTTHUMT00000087898.1|RP11-74C13.3-001|RP11-74C13.3|1126|	ENSMUST00000191207.1|ENSMUSG00000101693.1|OTTMUSG00000046077.1|OTTMUST00000120307.1|Gm19461-001|Gm19461|2566|	1126	2566	0.10795	0.00694438	0	0	1	0	0	0	1	0	0	1	1	0	0	2
ENST00000445680.1|ENSG00000243960.1|OTTHUMG00000011749.1|OTTHUMT00000032469.1|RP11-552M11.4-001|RP11-552M11.4|415|	ENSMUST00000167642.7|ENSMUSG00000105852.4|OTTMUSG00000052518.1|OTTMUST00000131700.1|Gm42890-001|Gm42890|2566|	415	2566	0.107945	0.00694644	0	0	0	0	0	0	0	0	0	1	0	0	1	2
ENST00000572998.1|ENSG00000262920.5|OTTHUMG00000177416.1|OTTHUMT00000436817.1|RP11-1260E13.1-002|RP11-1260E13.1|307|	ENSMUST00000139361.1|ENSMUSG00000087059.7|OTTMUSG00000006218.1|OTTMUST00000014042.1|Gm12339-002|Gm12339|525|	307	525	0.10777	0.00701889	0	0	0	0	0	0	0	1	0	0	1	0	0	2
ENST00000539078.1|ENSG00000255992.1|OTTHUMG00000168249.1|OTTHUMT00000398963.1|RP11-417L19.4-001|RP11-417L19.4|426|	ENSMUST00000181141.1|ENSMUSG00000097152.1|-|-|Gm26515-201|Gm26515|996|	426	996	0.107729	0.00703592	0	0	0	0	0	0	0	0	0	1	2	0	0	3
ENST00000565735.1|ENSG00000261213.1|OTTHUMG00000175853.1|OTTHUMT00000431183.1|RP11-510C10.4-001|RP11-510C10.4|1410|	ENSMUST00000199871.1|ENSMUSG00000104622.1|OTTMUSG00000052872.1|OTTMUST00000132316.1|Gm42541-001|Gm42541|2249|	1410	2249	0.107727	0.00703656	1	1	0	0	0	1	3	0	0	0	0	0	3	3
ENST00000606665.5|ENSG00000271858.5|OTTHUMG00000185536.1|OTTHUMT00000470673.1|CYB561D2-001|CYB561D2|910|	ENSMUST00000191791.1|ENSMUSG00000103409.1|OTTMUSG00000050931.1|OTTMUST00000129086.1|Lsmem2-001|Lsmem2|369|	910	369	0.107711	0.00704342	0	0	1	1	0	0	2	0	0	0	0	0	0	0
ENST00000576963.1|ENSG00000262772.1|OTTHUMG00000177465.1|OTTHUMT00000437044.1|RP11-353N14.2-001|RP11-353N14.2|1788|	ENSMUST00000181119.1|ENSMUSG00000097294.1|-|-|Gm26888-201|Gm26888|3683|	1788	3683	0.107691	0.00705179	0	0	1	1	1	0	3	0	0	1	1	0	0	2
ENST00000488257.2|ENSG00000272762.5|OTTHUMG00000161549.2|OTTHUMT00000349675.2|RP11-155D18.12-001|RP11-155D18.12|547|	ENSMUST00000150953.1|ENSMUSG00000086296.2|OTTMUSG00000034700.1|OTTMUST00000088121.1|D030055H07Rik-002|D030055H07Rik|4325|	547	4325	0.107629	0.00707777	0	0	0	1	0	0	1	0	0	0	2	0	0	2
ENST00000585742.1|ENSG00000267791.1|OTTHUMG00000180332.1|OTTHUMT00000450781.1|CTD-2659N19.2-001|CTD-2659N19.2|272|	ENSMUST00000156084.1|ENSMUSG00000087026.7|OTTMUSG00000031491.1|OTTMUST00000078020.1|A230103J11Rik-001|A230103J11Rik|2086|	272	2086	0.1076	0.00708991	0	0	1	0	0	0	1	0	0	3	3	1	0	7
ENST00000508713.1|ENSG00000250069.1|OTTHUMG00000163412.1|OTTHUMT00000373269.1|CTB-131B5.2-001|CTB-131B5.2|3025|	ENSMUST00000209540.1|ENSMUSG00000109836.1|OTTMUSG00000060489.1|OTTMUST00000147983.1|RP24-464B16.1-001|RP24-464B16.1|3416|	3025	3416	0.107504	0.00712995	1	1	1	0	0	2	5	2	0	0	0	0	4	6
ENST00000445873.5|ENSG00000236311.6|OTTHUMG00000018925.4|OTTHUMT00000049925.2|TLX1NB-001|TLX1NB|1862|	ENSMUST00000174082.1|ENSMUSG00000092369.1|OTTMUSG00000037632.1|OTTMUST00000097089.1|1700039E22Rik-001|1700039E22Rik|770|	1862	770	0.107445	0.0071549	0	0	2	1	0	0	3	0	0	0	0	0	0	0
ENST00000447623.2|ENSG00000231064.6|OTTHUMG00000035709.2|OTTHUMT00000086852.2|MIR92B-003|MIR92B|923|	ENSMUST00000131146.1|ENSMUSG00000086718.1|OTTMUSG00000029731.1|OTTMUST00000073773.1|Gm16069-001|Gm16069|545|	923	545	0.107407	0.00717131	0	0	2	1	0	0	3	0	0	1	1	0	0	2
ENST00000565700.1|ENSG00000261286.1|OTTHUMG00000176738.1|OTTHUMT00000433419.1|RP11-517C16.2-001|RP11-517C16.2|2998|	ENSMUST00000160605.1|ENSMUSG00000089776.1|OTTMUSG00000025265.1|OTTMUST00000062196.1|Gm15684-001|Gm15684|1814|	2998	1814	0.107368	0.0071878	0	0	2	2	0	0	4	0	0	1	0	0	0	1
ENST00000391437.2|ENSG00000212743.2|OTTHUMG00000187413.1|OTTHUMT00000474924.1|RP11-563J2.3-001|RP11-563J2.3|2447|	ENSMUST00000193857.1|ENSMUSG00000103321.1|OTTMUSG00000050954.1|OTTMUST00000129161.1|4933403L11Rik-001|4933403L11Rik|1121|	2447	1121	0.10719	0.00726377	0	1	0	0	0	0	1	0	0	0	0	0	0	0
ENST00000457449.1|ENSG00000229433.1|OTTHUMG00000156711.1|OTTHUMT00000345416.1|RP11-329B9.1-001|RP11-329B9.1|2591|	ENSMUST00000181476.1|ENSMUSG00000096918.1|-|-|Gm16863-201|Gm16863|2431|	2591	2431	0.107061	0.00731888	0	0	1	0	0	2	3	0	0	0	1	0	0	1
ENST00000448869.1|ENSG00000229953.1|OTTHUMG00000033321.1|OTTHUMT00000081838.1|RP11-284F21.7-001|RP11-284F21.7|758|	ENSMUST00000181406.1|ENSMUSG00000097428.1|OTTMUSG00000042914.1|OTTMUST00000112723.1|AW047730-002|AW047730|2579|	758	2579	0.106991	0.00734945	0	0	1	1	0	0	2	1	0	1	1	0	0	3
ENST00000625199.1|ENSG00000279339.1|OTTHUMG00000177583.1|OTTHUMT00000437898.1|CTD-2373H9.3-001|CTD-2373H9.3|2889|	ENSMUST00000134069.1|ENSMUSG00000085511.1|OTTMUSG00000003885.1|OTTMUST00000008572.1|Gm11738-001|Gm11738|2158|	2889	2158	0.106725	0.00746526	0	0	2	2	1	0	5	0	0	2	0	0	1	3
ENST00000422145.7|ENSG00000236922.9|OTTHUMG00000059450.8|OTTHUMT00000291362.4|LINC01378-002|LINC01378|2516|	ENSMUST00000196470.1|ENSMUSG00000104860.1|OTTMUSG00000052576.1|OTTMUST00000131786.1|Gm42510-001|Gm42510|2258|	2516	2258	0.106709	0.00747232	1	0	0	0	0	1	2	0	0	0	0	1	0	1
ENST00000616512.1|ENSG00000275437.1|OTTHUMG00000186989.1|OTTHUMT00000474194.1|RP5-908M14.10-001|RP5-908M14.10|3700|	ENSMUST00000145549.1|ENSMUSG00000084843.1|OTTMUSG00000016334.1|OTTMUST00000039249.1|B230312C02Rik-001|B230312C02Rik|1703|	3700	1703	0.106687	0.00748217	0	1	1	2	0	0	4	0	0	1	1	0	0	2
ENST00000416406.1|ENSG00000225450.1|OTTHUMG00000151003.1|OTTHUMT00000320914.1|RP3-508I15.14-001|RP3-508I15.14|500|	ENSMUST00000128342.1|ENSMUSG00000087543.1|OTTMUSG00000034300.1|OTTMUST00000087224.1|Gm16576-001|Gm16576|5404|	500	5404	0.106486	0.00757121	0	0	0	0	0	0	0	0	0	2	2	0	0	4
ENST00000624089.1|ENSG00000278936.1|OTTHUMG00000189127.1|OTTHUMT00000478885.1|CH17-140K24.7-002|CH17-140K24.7|484|	ENSMUST00000097612.3|ENSMUSG00000073594.3|OTTMUSG00000050624.1|OTTMUST00000128346.1|Gm10545-001|Gm10545|4969|	484	4969	0.106484	0.0075722	0	0	0	0	0	0	0	0	0	1	0	0	2	3
ENST00000526411.1|ENSG00000254942.1|OTTHUMG00000165650.1|OTTHUMT00000385578.1|RP5-1160K1.8-001|RP5-1160K1.8|582|	ENSMUST00000198175.1|ENSMUSG00000105961.1|OTTMUSG00000052809.1|OTTMUST00000132171.1|Gm42754-001|Gm42754|1027|	582	1027	0.106483	0.00757257	0	0	1	1	1	0	3	0	0	0	0	0	0	0
ENST00000608883.1|ENSG00000273455.1|OTTHUMG00000185979.1|OTTHUMT00000471904.1|RP11-305O4.3-001|RP11-305O4.3|439|	ENSMUST00000194716.1|ENSMUSG00000103672.1|OTTMUSG00000048436.2|OTTMUST00000124153.2|Gm37621-001|Gm37621|5531|	439	5531	0.106339	0.00763703	0	0	0	0	0	0	0	6	0	0	0	0	8	14
ENST00000575312.1|ENSG00000262049.1|OTTHUMG00000178170.1|OTTHUMT00000440811.1|RP13-1032I1.7-001|RP13-1032I1.7|1977|	ENSMUST00000163273.1|ENSMUSG00000090758.1|OTTMUSG00000036510.1|OTTMUST00000093617.1|Gm17178-001|Gm17178|357|	1977	357	0.106331	0.00764052	0	0	0	2	0	0	2	0	0	0	0	0	0	0
ENST00000513011.2|ENSG00000247828.7|OTTHUMG00000162704.4|OTTHUMT00000370017.2|TMEM161B-AS1-002|TMEM161B-AS1|833|	ENSMUST00000185973.1|ENSMUSG00000097292.2|OTTMUSG00000046949.1|OTTMUST00000121682.1|A230107N01Rik-002|A230107N01Rik|1491|	833	1491	0.106328	0.00764181	0	0	0	0	0	0	0	0	0	0	0	0	0	0
ENST00000439960.1|ENSG00000230729.1|OTTHUMG00000000438.1|OTTHUMT00000001106.1|RP11-296L22.8-001|RP11-296L22.8|631|	ENSMUST00000155382.1|ENSMUSG00000084761.1|OTTMUSG00000006680.1|OTTMUST00000015309.1|Gm12406-001|Gm12406|697|	631	697	0.106295	0.00765639	0	0	0	1	0	1	2	0	1	0	0	1	0	2
ENST00000518947.6|ENSG00000254369.6|OTTHUMG00000158092.4|OTTHUMT00000350162.4|HOXA-AS3-001|HOXA-AS3|3992|	ENSMUST00000155922.1|ENSMUSG00000056445.8|OTTMUSG00000018884.3|OTTMUST00000045417.2|Hoxaas2-001|Hoxaas2|1567|	3992	1567	0.106294	0.0076571	1	0	2	1	1	1	6	0	0	1	0	0	0	1
ENST00000559468.1|ENSG00000259475.1|OTTHUMG00000171895.1|OTTHUMT00000415701.1|RP11-654A16.3-001|RP11-654A16.3|588|	ENSMUST00000207427.1|ENSMUSG00000108871.1|OTTMUSG00000059788.1|OTTMUST00000146531.1|Gm45102-001|Gm45102|857|	588	857	0.106279	0.00766393	0	0	1	0	0	0	1	0	0	1	2	0	0	3
ENST00000465466.1|ENSG00000240889.1|OTTHUMG00000157407.1|OTTHUMT00000348732.1|NDUFB2-AS1-001|NDUFB2-AS1|1648|	ENSMUST00000180899.1|ENSMUSG00000097406.1|OTTMUSG00000042924.1|OTTMUST00000112743.1|Gm26833-001|Gm26833|440|	1648	440	0.106274	0.00766617	0	0	0	1	0	0	1	0	0	1	1	0	0	2
ENST00000449589.5|ENSG00000234741.7|OTTHUMG00000037216.5|OTTHUMT00000090586.1|GAS5-010|GAS5|712|	ENSMUST00000162163.7|ENSMUSG00000053332.13|OTTMUSG00000035061.3|OTTMUST00000089186.1|Gas5-006|Gas5|1614|	712	1614	0.106127	0.0077324	0	0	0	0	0	0	0	0	1	0	0	0	0	1
ENST00000579431.1|ENSG00000266010.1|OTTHUMG00000179440.1|OTTHUMT00000446375.1|GATA6-AS1-003|GATA6-AS1|481|	ENSMUST00000181316.1|ENSMUSG00000097222.1|-|-|1010001N08Rik-202|1010001N08Rik|728|	481	728	0.106012	0.0077847	0	0	1	0	0	0	1	0	0	0	0	0	0	0
ENST00000458615.5|ENSG00000231427.5|OTTHUMG00000156067.1|OTTHUMT00000342916.1|LINC01445-001|LINC01445|679|	ENSMUST00000193500.1|ENSMUSG00000104323.1|OTTMUSG00000047763.1|OTTMUST00000122986.1|Gm37319-001|Gm37319|636|	679	636	0.106012	0.00778493	0	0	0	0	0	1	1	0	0	0	0	0	1	1
ENST00000414339.2|ENSG00000234917.2|OTTHUMG00000007522.2|OTTHUMT00000019785.2|RP5-994D16.3-001|RP5-994D16.3|601|	ENSMUST00000195276.1|ENSMUSG00000102819.1|OTTMUSG00000047731.1|OTTMUST00000122946.1|Gm37817-001|Gm37817|434|	601	434	0.106005	0.00778785	0	0	0	0	0	0	0	0	0	1	0	0	0	1
ENST00000427039.1|ENSG00000237461.1|OTTHUMG00000020358.1|OTTHUMT00000053397.1|RP11-554F20.1-001|RP11-554F20.1|1544|	ENSMUST00000195786.1|ENSMUSG00000102450.1|OTTMUSG00000047710.1|OTTMUST00000122923.1|Gm38343-001|Gm38343|1060|	1544	1060	0.105923	0.00782567	0	0	0	1	0	0	1	0	0	0	0	0	0	0
ENST00000514115.5|ENSG00000246316.7|OTTHUMG00000162871.1|OTTHUMT00000370916.1|RP11-492A10.1-003|RP11-492A10.1|443|	ENSMUST00000184346.1|ENSMUSG00000098284.7|OTTMUSG00000044951.1|OTTMUST00000118143.1|A330093E20Rik-002|A330093E20Rik|574|	443	574	0.105904	0.00783436	0	0	0	0	0	0	0	0	0	0	0	0	0	0
ENST00000624209.1|ENSG00000279036.1|OTTHUMG00000177920.1|OTTHUMT00000439715.1|RP11-81K2.2-001|RP11-81K2.2|3578|	ENSMUST00000156822.1|ENSMUSG00000084856.1|OTTMUSG00000001753.1|OTTMUST00000003492.1|Gm11528-001|Gm11528|914|	3578	914	0.105903	0.00783483	2	0	7	7	3	0	19	0	0	0	0	0	0	0
ENST00000565416.1|ENSG00000261801.5|OTTHUMG00000172711.4|OTTHUMT00000420136.1|LOXL1-AS1-012|LOXL1-AS1|588|	ENSMUST00000193528.1|ENSMUSG00000103486.1|OTTMUSG00000042491.1|OTTMUST00000112035.1|Gm10657-001|Gm10657|1031|	588	1031	0.105595	0.00797749	1	0	1	0	0	0	2	1	0	2	3	0	0	6
ENST00000566143.2|ENSG00000261266.2|OTTHUMG00000177100.2|OTTHUMT00000435295.2|CTD-2196E14.5-001|CTD-2196E14.5|641|	ENSMUST00000206202.1|ENSMUSG00000108688.1|OTTMUSG00000058104.1|OTTMUST00000142670.1|Gm44985-001|Gm44985|1016|	641	1016	0.105472	0.00803505	0	0	0	0	0	0	0	0	0	0	0	0	0	0
ENST00000594676.1|ENSG00000269792.1|OTTHUMG00000183069.1|OTTHUMT00000464963.1|CTB-60E11.9-001|CTB-60E11.9|647|	ENSMUST00000184073.1|ENSMUSG00000099098.4|OTTMUSG00000044907.1|OTTMUST00000118031.1|1110035H17Rik-001|1110035H17Rik|1241|	647	1241	0.105422	0.0080584	0	0	1	0	0	0	1	0	0	2	1	0	0	3
ENST00000445452.1|ENSG00000230084.5|OTTHUMG00000156209.1|OTTHUMT00000343488.1|RP4-613B23.1-002|RP4-613B23.1|473|	ENSMUST00000181325.2|ENSMUSG00000097820.2|OTTMUSG00000043332.1|OTTMUST00000113683.1|E530011L22Rik-001|E530011L22Rik|3304|	473	3304	0.105367	0.00808412	0	0	1	1	0	0	2	1	0	3	3	0	0	7
ENST00000584277.1|ENSG00000264491.1|OTTHUMG00000179551.1|OTTHUMT00000447037.1|RP11-349A8.3-001|RP11-349A8.3|460|	ENSMUST00000141271.1|ENSMUSG00000087184.1|OTTMUSG00000003105.1|OTTMUST00000006395.1|Gm11650-001|Gm11650|1145|	460	1145	0.105326	0.00810365	0	0	0	1	0	0	1	1	0	1	1	0	0	3
ENST00000598924.1|ENSG00000269814.1|OTTHUMG00000183313.1|OTTHUMT00000466139.1|CTC-273B12.10-001|CTC-273B12.10|454|	ENSMUST00000211394.1|ENSMUSG00000110197.1|OTTMUSG00000060121.1|OTTMUST00000147161.1|RP24-502E20.4-001|RP24-502E20.4|898|	454	898	0.105026	0.00824692	0	0	1	1	0	0	2	0	0	2	1	0	0	3
ENST00000576215.1|ENSG00000263218.2|OTTHUMG00000177658.2|OTTHUMT00000438274.1|CTD-2561B21.7-001|CTD-2561B21.7|338|	ENSMUST00000155681.1|ENSMUSG00000075389.3|OTTMUSG00000004109.1|OTTMUST00000009280.1|2810410L24Rik-001|2810410L24Rik|2615|	338	2615	0.104932	0.00829224	0	0	1	1	0	0	2	2	0	4	4	0	0	10
ENST00000600669.1|ENSG00000269194.1|OTTHUMG00000183160.1|OTTHUMT00000465313.1|AC006942.4-001|AC006942.4|520|	ENSMUST00000208849.1|ENSMUSG00000108832.1|OTTMUSG00000058965.1|OTTMUST00000144672.1|Gm44832-001|Gm44832|2303|	520	2303	0.104878	0.00831804	0	1	1	1	0	0	3	0	0	1	1	0	0	2
ENST00000624863.1|ENSG00000279377.1|OTTHUMG00000182914.1|OTTHUMT00000464306.1|AC003973.3-001|AC003973.3|2822|	ENSMUST00000180908.7|ENSMUSG00000097360.7|OTTMUSG00000042799.1|OTTMUST00000112565.1|9430065F17Rik-001|9430065F17Rik|1082|	2822	1082	0.104653	0.00842814	1	0	0	0	0	1	2	0	0	0	0	0	0	0
ENST00000502205.2|ENSG00000246422.2|OTTHUMG00000164151.1|OTTHUMT00000377502.1|CTD-2024I7.13-001|CTD-2024I7.13|2480|	ENSMUST00000192137.1|ENSMUSG00000073590.3|OTTMUSG00000050777.1|OTTMUST00000128701.1|3222401L13Rik-001|3222401L13Rik|6292|	2480	6292	0.104451	0.00852768	0	0	0	0	0	0	0	0	0	0	0	0	2	2
ENST00000602862.1|ENSG00000270124.1|OTTHUMG00000183874.1|OTTHUMT00000467245.1|RP11-118F19.1-001|RP11-118F19.1|601|	ENSMUST00000183235.1|ENSMUSG00000097960.1|OTTMUSG00000043041.1|OTTMUST00000112975.1|A330074K22Rik-001|A330074K22Rik|2489|	601	2489	0.10439	0.00855762	0	0	0	1	0	0	1	0	0	3	1	0	0	4
ENST00000558254.5|ENSG00000232386.9|OTTHUMG00000186438.2|OTTHUMT00000416696.2|RP11-66B24.2-001|RP11-66B24.2|755|	ENSMUST00000181911.2|ENSMUSG00000097634.2|OTTMUSG00000057976.1|OTTMUST00000142297.1|Gm26827-002|Gm26827|148|	755	148	0.104338	0.00858387	0	0	1	0	0	1	2	0	0	0	1	0	0	1
ENST00000561155.1|ENSG00000259180.1|OTTHUMG00000172615.1|OTTHUMT00000419475.1|RP11-420M1.2-001|RP11-420M1.2|364|	ENSMUST00000193259.1|ENSMUSG00000102330.1|OTTMUSG00000044738.1|OTTMUST00000117631.1|Gm37234-001|Gm37234|1441|	364	1441	0.104253	0.00862619	0	0	0	0	0	0	0	0	0	0	0	0	0	0
ENST00000416996.1|ENSG00000225472.1|OTTHUMG00000019570.1|OTTHUMT00000051744.1|RP11-120J1.1-001|RP11-120J1.1|964|	ENSMUST00000139835.1|ENSMUSG00000087413.1|OTTMUSG00000000396.2|OTTMUST00000001600.1|Gm11266-001|Gm11266|1271|	964	1271	0.104066	0.0087202	0	0	0	0	0	0	0	0	0	0	0	0	0	0
ENST00000626175.1|ENSG00000281473.1|OTTHUMG00000189533.1|OTTHUMT00000479922.1|PISRT1-001|PISRT1|531|	ENSMUST00000195532.1|ENSMUSG00000102458.1|OTTMUSG00000047607.1|OTTMUST00000122747.1|Pisrt1-001|Pisrt1|515|	531	515	0.103754	0.00887948	1	0	0	0	0	1	2	1	0	1	0	0	1	3
ENST00000623430.1|ENSG00000267757.4|OTTHUMG00000182128.1|OTTHUMT00000459639.1|EML2-AS1-001|EML2-AS1|886|	ENSMUST00000181954.1|ENSMUSG00000097038.1|-|-|Gm26821-201|Gm26821|2652|	886	2652	0.103604	0.00895684	0	0	0	0	0	0	0	0	0	1	0	0	0	1
ENST00000428660.1|ENSG00000233108.1|OTTHUMG00000152017.1|OTTHUMT00000324881.1|AC006042.7-001|AC006042.7|568|	ENSMUST00000148063.7|ENSMUSG00000087305.8|OTTMUSG00000029348.6|OTTMUST00000072717.1|A430035B10Rik-003|A430035B10Rik|2010|	568	2010	0.103558	0.00898063	0	0	0	0	0	0	0	0	0	0	0	0	0	0
ENST00000565467.1|ENSG00000260807.6|OTTHUMG00000172822.2|OTTHUMT00000420706.2|RP11-161M6.2-001|RP11-161M6.2|3726|	ENSMUST00000163493.2|ENSMUSG00000091475.2|OTTMUSG00000038221.2|OTTMUST00000098396.2|2810468N07Rik-001|2810468N07Rik|1349|	3726	1349	0.103388	0.0090691	2	0	5	5	0	0	12	0	0	0	1	0	0	1
ENST00000601508.1|ENSG00000268603.1|OTTHUMG00000183007.1|OTTHUMT00000464655.1|RP11-316O14.1-001|RP11-316O14.1|636|	ENSMUST00000185727.1|ENSMUSG00000099519.1|OTTMUSG00000048529.1|OTTMUST00000124354.1|Gm29253-001|Gm29253|5231|	636	5231	0.103368	0.00907959	0	0	2	2	0	0	4	0	0	2	2	0	0	4
ENST00000432195.1|ENSG00000225938.1|OTTHUMG00000010942.1|OTTHUMT00000030146.1|RP4-575N6.4-001|RP4-575N6.4|403|	ENSMUST00000064809.6|ENSMUSG00000052769.7|OTTMUSG00000054438.1|OTTMUST00000135012.1|Gm9889-001|Gm9889|1579|	403	1579	0.10322	0.00915732	0	0	1	1	0	0	2	0	0	1	1	0	0	2
ENST00000624533.1|ENSG00000247137.8|OTTHUMG00000167033.2|OTTHUMT00000467571.1|RP11-727A23.5-008|RP11-727A23.5|2295|	ENSMUST00000182453.1|ENSMUSG00000098041.1|OTTMUSG00000043453.1|OTTMUST00000113966.1|Gm26981-001|Gm26981|3169|	2295	3169	0.103209	0.00916326	0	0	0	0	0	1	1	0	0	0	0	0	0	0
ENST00000624289.1|ENSG00000279344.1|OTTHUMG00000173214.1|OTTHUMT00000422487.1|RP11-44F14.7-001|RP11-44F14.7|2594|	ENSMUST00000210728.1|ENSMUSG00000109727.1|OTTMUSG00000061390.1|OTTMUST00000149788.1|RP24-225A21.3-001|RP24-225A21.3|2844|	2594	2844	0.103158	0.00919036	0	0	0	0	0	1	1	0	0	1	1	0	0	2
ENST00000623593.1|ENSG00000279821.1|OTTHUMG00000163397.1|OTTHUMT00000373136.1|RP11-1334A24.5-001|RP11-1334A24.5|3026|	ENSMUST00000138992.1|ENSMUSG00000086506.1|OTTMUSG00000027740.1|OTTMUST00000068652.1|Gm15911-001|Gm15911|809|	3026	809	0.103004	0.00927241	1	1	0	0	1	0	3	0	0	0	0	0	0	0
ENST00000504280.1|ENSG00000249352.4|OTTHUMG00000162336.3|OTTHUMT00000368586.2|RP11-141O11.2-002|RP11-141O11.2|810|	ENSMUST00000195282.1|ENSMUSG00000104450.1|OTTMUSG00000047355.1|OTTMUST00000122364.1|Gm37830-001|Gm37830|837|	810	837	0.103004	0.00927247	0	0	0	0	1	0	1	0	0	0	0	0	1	1
ENST00000510073.1|ENSG00000251173.1|OTTHUMG00000160405.3|OTTHUMT00000360471.2|UCHL1-AS1-001|UCHL1-AS1|451|	ENSMUST00000177319.1|ENSMUSG00000087601.3|OTTMUSG00000042271.2|OTTMUST00000111181.1|Uchl1os-002|Uchl1os|505|	451	505	0.102715	0.00942786	0	0	0	0	0	0	0	0	0	0	0	0	0	0
ENST00000624435.1|ENSG00000280056.1|OTTHUMG00000176166.1|OTTHUMT00000431589.1|RP11-562F9.3-001|RP11-562F9.3|385|	ENSMUST00000203390.1|ENSMUSG00000108242.1|OTTMUSG00000057030.1|OTTMUST00000140509.1|9330118I20Rik-002|9330118I20Rik|1066|	385	1066	0.102689	0.00944182	0	0	0	0	0	0	0	0	0	0	0	0	0	0
ENST00000498297.1|ENSG00000231305.3|OTTHUMG00000159813.1|OTTHUMT00000357491.1|RP11-723O4.2-001|RP11-723O4.2|1298|	ENSMUST00000204640.1|ENSMUSG00000107719.1|OTTMUSG00000057442.1|OTTMUST00000141302.1|Gm43937-001|Gm43937|3122|	1298	3122	0.102663	0.009456	0	0	0	0	0	0	0	1	0	0	0	1	0	2
ENST00000523608.2|ENSG00000253308.2|OTTHUMG00000159990.3|OTTHUMT00000358745.3|RP1-170O19.17-001|RP1-170O19.17|757|	ENSMUST00000125305.1|ENSMUSG00000086126.1|OTTMUSG00000018887.1|OTTMUST00000045424.1|Evx1os-001|Evx1os|2916|	757	2916	0.102609	0.00948547	0	0	1	1	0	0	2	0	0	3	2	0	0	5
ENST00000585075.1|ENSG00000263843.1|OTTHUMG00000179606.1|OTTHUMT00000447278.1|RP11-649A18.12-002|RP11-649A18.12|2527|	ENSMUST00000180919.1|ENSMUSG00000097020.1|-|-|Gm26613-201|Gm26613|1457|	2527	1457	0.102478	0.00955699	0	0	1	1	0	0	2	0	0	1	1	0	0	2
ENST00000607385.1|ENSG00000272366.1|OTTHUMG00000185319.1|OTTHUMT00000470160.1|RP11-573G6.10-001|RP11-573G6.10|239|	ENSMUST00000181515.1|ENSMUSG00000097638.1|OTTMUSG00000042880.1|OTTMUST00000112668.1|Carlr-001|Carlr|2574|	239	2574	0.10247	0.00956167	0	0	1	1	0	0	2	1	0	1	1	0	0	3
ENST00000374945.1|ENSG00000204277.1|OTTHUMG00000177511.1|OTTHUMT00000437286.1|RP11-219G17.4-001|RP11-219G17.4|2934|	ENSMUST00000155505.1|ENSMUSG00000087486.1|OTTMUSG00000003675.1|OTTMUST00000007952.1|Gm11723-001|Gm11723|466|	2934	466	0.102358	0.00962334	0	0	1	2	0	0	3	0	0	0	0	0	0	0
ENST00000592897.1|ENSG00000267080.5|OTTHUMG00000181810.1|OTTHUMT00000457708.1|ASB16-AS1-002|ASB16-AS1|551|	ENSMUST00000123060.1|ENSMUSG00000087339.1|OTTMUSG00000002351.1|OTTMUST00000004682.1|Gm11586-001|Gm11586|566|	551	566	0.102314	0.00964736	0	0	0	0	0	0	0	0	0	2	1	0	0	3
ENST00000577171.1|ENSG00000261227.2|OTTHUMG00000172965.2|OTTHUMT00000440525.1|AC140912.1-002|AC140912.1|1054|	ENSMUST00000211262.1|ENSMUSG00000109868.1|OTTMUSG00000060504.2|OTTMUST00000148018.1|RP23-143B2.1-003|RP23-143B2.1|836|	1054	836	0.102054	0.00979233	0	1	0	0	0	0	1	0	0	0	0	0	0	0
ENST00000417346.1|ENSG00000218018.2|OTTHUMG00000134335.1|OTTHUMT00000259506.1|RP4-800J21.3-001|RP4-800J21.3|1540|	ENSMUST00000173622.1|ENSMUSG00000092596.1|OTTMUSG00000037709.1|OTTMUST00000097399.1|Gm20490-001|Gm20490|198|	1540	198	0.101932	0.00986135	0	0	1	1	0	0	2	0	0	1	1	0	0	2
ENST00000535755.1|ENSG00000256879.1|OTTHUMG00000168961.1|OTTHUMT00000401755.1|RP11-284H19.1-001|RP11-284H19.1|525|	ENSMUST00000190040.1|ENSMUSG00000100707.1|OTTMUSG00000046193.1|OTTMUST00000120480.1|Gm28523-001|Gm28523|1588|	525	1588	0.101913	0.00987188	0	0	1	0	0	0	1	0	0	2	0	0	1	3
ENST00000579136.1|ENSG00000265359.1|OTTHUMG00000179793.1|OTTHUMT00000448164.1|RP5-1110E20.1-001|RP5-1110E20.1|258|	ENSMUST00000139095.1|ENSMUSG00000084890.1|OTTMUSG00000004987.2|OTTMUST00000041187.1|A830036E02Rik-002|A830036E02Rik|3413|	258	3413	0.101477	0.0101209	0	0	0	0	0	0	0	0	0	0	0	0	1	1
ENST00000434839.2|ENSG00000229807.10|OTTHUMG00000021839.5|OTTHUMT00000083628.2|XIST-005|XIST|2865|	ENSMUST00000195208.1|ENSMUSG00000104064.1|OTTMUSG00000043175.1|OTTMUST00000113264.1|Gm37956-001|Gm37956|2010|	2865	2010	0.101426	0.0101505	1	1	0	0	0	3	5	2	0	1	0	0	2	5
ENST00000457720.1|ENSG00000230013.1|OTTHUMG00000020419.1|OTTHUMT00000053496.1|RP11-217B7.3-001|RP11-217B7.3|606|	ENSMUST00000139222.1|ENSMUSG00000087192.7|OTTMUSG00000007154.1|OTTMUST00000016504.1|4930412L05Rik-002|4930412L05Rik|663|	606	663	0.101389	0.0101722	1	0	0	0	0	0	1	0	0	1	0	0	0	1
ENST00000563775.1|ENSG00000259895.1|OTTHUMG00000177050.1|OTTHUMT00000435103.1|RP11-715J22.2-001|RP11-715J22.2|3264|	ENSMUST00000171563.3|ENSMUSG00000085185.9|OTTMUSG00000032976.1|-|BC028777-201|BC028777|815|	3264	815	0.101062	0.0103634	0	0	1	1	0	0	2	0	0	0	0	0	0	0
ENST00000420866.1|ENSG00000231453.1|OTTHUMG00000154148.1|OTTHUMT00000334113.1|LINC01305-001|LINC01305|3123|	ENSMUST00000135297.7|ENSMUSG00000063714.15|OTTMUSG00000013209.1|OTTMUST00000031929.1|Sp3os-002|Sp3os|370|	3123	370	0.100954	0.0104276	0	0	3	3	0	0	6	0	0	0	0	0	0	0
ENST00000523413.2|ENSG00000253572.2|OTTHUMG00000163634.2|OTTHUMT00000374620.2|RP11-107N7.1-001|RP11-107N7.1|722|	ENSMUST00000191800.1|ENSMUSG00000103438.1|OTTMUSG00000047359.1|OTTMUST00000122368.1|Gm36991-001|Gm36991|648|	722	648	0.100882	0.0104705	0	0	0	0	0	0	0	1	1	0	0	0	0	2
ENST00000527960.1|ENSG00000244926.6|OTTHUMG00000166553.1|OTTHUMT00000390395.1|ALKBH3-AS1-002|ALKBH3-AS1|547|	ENSMUST00000136886.7|ENSMUSG00000027196.11|OTTMUSG00000015001.1|OTTMUST00000035625.1|Alkbh3os1-001|Alkbh3os1|1550|	547	1550	0.100629	0.010622	0	0	0	0	0	1	1	0	0	0	0	0	0	0
ENST00000455071.1|ENSG00000234155.1|OTTHUMG00000015137.1|OTTHUMT00000041386.1|RP11-30P6.6-001|RP11-30P6.6|2513|	ENSMUST00000188747.1|ENSMUSG00000101335.1|OTTMUSG00000045598.1|OTTMUST00000119475.1|Gm28229-001|Gm28229|2153|	2513	2153	0.100596	0.0106421	1	0	0	0	0	1	2	0	0	1	0	0	1	2
ENST00000508112.1|ENSG00000249341.1|OTTHUMG00000160650.1|OTTHUMT00000361557.1|RP11-317M11.1-002|RP11-317M11.1|1594|	ENSMUST00000201412.1|ENSMUSG00000107165.1|OTTMUSG00000056010.1|OTTMUST00000138532.1|Gm43747-001|Gm43747|1330|	1594	1330	0.10046	0.0107245	0	0	0	0	0	0	0	0	0	0	0	0	0	0
ENST00000411861.5|ENSG00000130600.16|OTTHUMG00000012477.5|OTTHUMT00000142897.3|H19-004|H19|1771|	ENSMUST00000054910.8|ENSMUSG00000043795.9|OTTMUSG00000016823.2|OTTMUST00000040867.1|Prr33-001|Prr33|2251|	1771	2251	0.100347	0.0107935	0	1	2	1	1	0	5	0	0	3	2	0	0	5
ENST00000567919.1|ENSG00000261467.2|OTTHUMG00000173182.1|OTTHUMT00000422326.1|RP11-731K22.1-001|RP11-731K22.1|2776|	ENSMUST00000202662.1|ENSMUSG00000107335.1|OTTMUSG00000055854.1|OTTMUST00000138205.1|Gm43372-001|Gm43372|3016|	2776	3016	0.100345	0.0107949	0	0	0	0	0	0	0	0	0	2	4	0	1	7
ENST00000442967.1|ENSG00000225953.2|OTTHUMG00000154470.1|OTTHUMT00000335372.1|SATB2-AS1-006|SATB2-AS1|560|	ENSMUST00000195287.1|ENSMUSG00000104310.1|OTTMUSG00000046021.1|OTTMUST00000120190.1|Gm4081-001|Gm4081|1838|	560	1838	0.100294	0.0108259	0	0	0	0	0	0	0	0	0	0	2	0	0	2
ENST00000624089.1|ENSG00000278936.1|OTTHUMG00000189127.1|OTTHUMT00000478885.1|CH17-140K24.7-002|CH17-140K24.7|484|	ENSMUST00000192178.1|ENSMUSG00000103384.1|OTTMUSG00000050609.1|OTTMUST00000128319.1|Gm37753-001|Gm37753|439|	484	439	0.100194	0.0108877	0	0	0	0	0	0	0	0	0	0	0	0	0	0
ENST00000589379.1|ENSG00000267607.1|OTTHUMG00000180404.1|OTTHUMT00000451213.1|CTD-2369P2.8-001|CTD-2369P2.8|3219|	ENSMUST00000180870.1|ENSMUSG00000097535.1|-|-|Gm26592-201|Gm26592|1730|	3219	1730	0.100184	0.0108935	0	0	3	2	0	0	5	0	0	0	2	0	0	2
ENST00000592465.1|ENSG00000267077.1|OTTHUMG00000177884.1|OTTHUMT00000439467.1|RP11-127I20.5-001|RP11-127I20.5|720|	ENSMUST00000181498.1|ENSMUSG00000097397.1|-|-|Gm16861-201|Gm16861|1647|	720	1647	0.100166	0.0109047	0	0	1	2	1	0	4	0	1	1	1	1	0	4
ENST00000429464.1|ENSG00000235597.1|OTTHUMG00000153050.1|OTTHUMT00000329245.1|LINC01102-004|LINC01102|2128|	ENSMUST00000189138.1|ENSMUSG00000101299.2|OTTMUSG00000046300.2|OTTMUST00000120694.1|Gm28175-001|Gm28175|399|	2128	399	0.100162	0.0109075	0	0	0	0	0	0	0	0	0	1	1	0	1	3
ENST00000564834.1|ENSG00000261455.1|OTTHUMG00000173415.1|OTTHUMT00000423022.1|LINC01003-001|LINC01003|1764|	ENSMUST00000188465.1|ENSMUSG00000101856.1|OTTMUSG00000045350.1|OTTMUST00000119071.1|1700096K18Rik-001|1700096K18Rik|1454|	1764	1454	0.10015	0.0109151	1	0	2	1	0	0	4	2	0	0	0	0	2	4
ENST00000439088.1|ENSG00000234880.1|OTTHUMG00000090296.1|OTTHUMT00000206656.1|LINC00163-002|LINC00163|2135|	ENSMUST00000180790.1|ENSMUSG00000097811.1|-|-|2810425M01Rik-201|2810425M01Rik|1850|	2135	1850	0.10013	0.0109271	0	0	1	3	1	0	5	0	0	1	1	0	0	2
ENST00000518750.1|ENSG00000253523.1|OTTHUMG00000164283.1|OTTHUMT00000378096.1|RP11-1112C15.2-001|RP11-1112C15.2|877|	ENSMUST00000131675.1|ENSMUSG00000087099.1|OTTMUSG00000004223.1|OTTMUST00000009549.1|Gm11782-001|Gm11782|2804|	877	2804	0.100126	0.0109296	0	0	0	0	0	0	0	0	0	0	0	0	0	0
ENST00000560818.1|ENSG00000259203.1|OTTHUMG00000172420.1|OTTHUMT00000418460.1|RP11-209K10.2-001|RP11-209K10.2|572|	ENSMUST00000160017.1|ENSMUSG00000066477.13|OTTMUSG00000034723.3|OTTMUST00000088214.1|Gm16551-003|Gm16551|2579|	572	2579	0.0998654	0.011092	0	0	0	0	0	1	1	0	0	2	0	0	0	2
ENST00000423260.1|ENSG00000229931.1|OTTHUMG00000153136.1|OTTHUMT00000329723.1|RP1-151F17.1-001|RP1-151F17.1|491|	ENSMUST00000189843.1|ENSMUSG00000038152.4|OTTMUSG00000046915.1|OTTMUST00000121620.1|5033430I15Rik-002|5033430I15Rik|523|	491	523	0.0997486	0.0111656	0	0	1	1	0	0	2	0	0	1	1	0	0	2
ENST00000415575.1|ENSG00000234763.1|OTTHUMG00000014223.1|OTTHUMT00000039801.1|RP11-203H2.2-001|RP11-203H2.2|746|	ENSMUST00000181087.1|ENSMUSG00000097151.1|-|-|Gm26514-201|Gm26514|4231|	746	4231	0.0995325	0.0113027	1	0	0	0	0	1	2	1	0	0	0	0	7	8
ENST00000562341.1|ENSG00000259854.1|OTTHUMG00000175508.1|OTTHUMT00000430311.1|RP11-211G23.1-001|RP11-211G23.1|2424|	ENSMUST00000208788.1|ENSMUSG00000109305.1|OTTMUSG00000059416.2|OTTMUST00000145845.1|1810010D01Rik-001|1810010D01Rik|889|	2424	889	0.09946	0.0113491	0	0	0	2	1	0	3	0	0	0	1	0	0	1
ENST00000553367.5|ENSG00000196273.7|OTTHUMG00000171592.1|OTTHUMT00000414343.1|LINC00523-004|LINC00523|889|	ENSMUST00000189236.1|ENSMUSG00000101767.1|OTTMUSG00000047122.1|OTTMUST00000121939.1|Gm28498-001|Gm28498|469|	889	469	0.0993474	0.0114214	0	0	0	0	0	0	0	0	0	1	0	0	0	1
ENST00000636354.1|ENSG00000283213.1|OTTHUMG00000191620.1|OTTHUMT00000488864.1|CTC-591M7.1-002|CTC-591M7.1|4683|	ENSMUST00000205846.1|ENSMUSG00000108752.1|OTTMUSG00000058107.1|OTTMUST00000142676.1|Gm45191-001|Gm45191|5439|	4683	5439	0.0992086	0.0115111	1	0	0	0	0	3	4	1	0	2	0	1	5	9
ENST00000527474.5|ENSG00000255248.7|OTTHUMG00000166035.4|OTTHUMT00000387551.1|MIR100HG-001|MIR100HG|959|	ENSMUST00000181296.1|ENSMUSG00000074415.10|OTTMUSG00000042492.3|OTTMUST00000112040.1|2610203C20Rik-005|2610203C20Rik|4244|	959	4244	0.0991027	0.01158	1	0	0	0	0	1	2	1	1	1	0	1	4	8
ENST00000447221.1|ENSG00000233016.6|OTTHUMG00000020949.1|OTTHUMT00000055147.1|SNHG7-002|SNHG7|2157|	ENSMUST00000155199.1|ENSMUSG00000087595.1|OTTMUSG00000012730.1|OTTMUST00000030394.1|1810012K08Rik-001|1810012K08Rik|574|	2157	574	0.0990002	0.0116469	0	0	0	0	0	0	0	0	1	0	0	0	0	1
ENST00000638012.1|ENSG00000225746.9|OTTHUMG00000029060.4|OTTHUMT00000488911.1|SNHG23-022|SNHG23|3757|	ENSMUST00000182406.1|ENSMUSG00000097451.9|OTTMUSG00000043208.1|OTTMUST00000113333.1|Rian-003|Rian|3476|	3757	3476	0.0989928	0.0116518	1	1	0	0	0	2	4	0	1	0	0	0	0	1
ENST00000624650.1|ENSG00000279394.1|OTTHUMG00000176725.1|OTTHUMT00000433310.1|RP11-81A1.4-001|RP11-81A1.4|2260|	ENSMUST00000194342.1|ENSMUSG00000103581.1|OTTMUSG00000046281.1|OTTMUST00000120665.1|Gm37833-001|Gm37833|3256|	2260	3256	0.0989907	0.0116532	3	0	0	0	0	4	7	0	0	0	0	0	2	2
ENST00000505700.1|ENSG00000250451.5|OTTHUMG00000160024.1|OTTHUMT00000358934.1|HOXC-AS1-001|HOXC-AS1|548|	ENSMUST00000188201.1|ENSMUSG00000101588.1|OTTMUSG00000048330.1|OTTMUST00000123960.1|Gm28265-001|Gm28265|2319|	548	2319	0.0989468	0.011682	1	0	2	1	0	0	4	0	0	3	3	0	0	6
ENST00000440769.3|ENSG00000234292.3|OTTHUMG00000162618.1|OTTHUMT00000369769.1|RP11-213H15.1-001|RP11-213H15.1|1046|	ENSMUST00000181043.7|ENSMUSG00000097098.7|-|-|9330111N05Rik-202|9330111N05Rik|2449|	1046	2449	0.0989249	0.0116964	1	1	0	0	0	0	2	1	0	0	1	0	0	2
ENST00000623140.1|ENSG00000278909.1|OTTHUMG00000173397.1|OTTHUMT00000422978.1|RP11-401P9.7-001|RP11-401P9.7|3365|	ENSMUST00000209918.1|ENSMUSG00000110187.1|OTTMUSG00000061475.1|OTTMUST00000150024.1|RP23-298O13.2-001|RP23-298O13.2|2917|	3365	2917	0.0988729	0.0117307	2	3	0	1	0	2	8	0	1	0	0	0	0	1
ENST00000598378.2|ENSG00000267432.5|OTTHUMG00000177638.3|OTTHUMT00000437930.2|DNAH17-AS1-004|DNAH17-AS1|4597|	ENSMUST00000134069.1|ENSMUSG00000085511.1|OTTMUSG00000003885.1|OTTMUST00000008572.1|Gm11738-001|Gm11738|2158|	4597	2158	0.0984761	0.011995	1	0	2	1	1	0	5	0	0	2	0	0	1	3
ENST00000616608.1|ENSG00000273771.1|OTTHUMG00000187028.1|OTTHUMT00000474280.1|RP11-236L14.2-001|RP11-236L14.2|2797|	ENSMUST00000207627.1|ENSMUSG00000109021.1|OTTMUSG00000059663.1|OTTMUST00000146289.1|Gm44812-001|Gm44812|5349|	2797	5349	0.0984159	0.0120355	0	0	0	1	0	1	2	0	0	0	0	0	0	0
ENST00000441272.2|ENSG00000237588.2|OTTHUMG00000041297.2|OTTHUMT00000098960.2|RP11-66D17.3-001|RP11-66D17.3|4122|	ENSMUST00000180555.1|ENSMUSG00000097428.1|OTTMUSG00000042914.1|OTTMUST00000112724.1|AW047730-001|AW047730|984|	4122	984	0.0984158	0.0120356	0	0	2	5	0	1	8	1	0	1	1	0	0	3
ENST00000577700.5|ENSG00000232956.8|OTTHUMG00000179544.2|OTTHUMT00000447027.1|SNHG15-002|SNHG15|3116|	ENSMUST00000134527.1|ENSMUSG00000085156.7|OTTMUSG00000005115.1|OTTMUST00000011445.1|Snhg15-001|Snhg15|675|	3116	675	0.0983987	0.0120471	0	2	0	0	0	1	3	0	0	0	0	0	0	0
ENST00000569428.1|ENSG00000256508.2|OTTHUMG00000172940.1|OTTHUMT00000421417.1|MRGPRF-AS1-003|MRGPRF-AS1|532|	ENSMUST00000207703.1|ENSMUSG00000109305.1|OTTMUSG00000059416.2|OTTMUST00000146757.1|1810010D01Rik-004|1810010D01Rik|447|	532	447	0.0981714	0.0122015	0	0	0	0	0	0	0	0	0	0	0	0	0	0
ENST00000531592.1|ENSG00000253973.2|OTTHUMG00000163879.2|OTTHUMT00000376177.2|RP11-467K18.2-001|RP11-467K18.2|560|	ENSMUST00000209731.1|ENSMUSG00000110062.1|OTTMUSG00000034064.2|OTTMUST00000086046.2|AC122844.3-001|AC122844.3|2669|	560	2669	0.0981285	0.0122309	0	0	1	1	0	0	2	0	0	2	1	0	0	3
ENST00000623734.1|ENSG00000278957.1|OTTHUMG00000184122.1|OTTHUMT00000468064.1|RP11-89K21.2-001|RP11-89K21.2|483|	ENSMUST00000176958.1|ENSMUSG00000093460.9|OTTMUSG00000040061.5|OTTMUST00000104026.1|Six3os1-003|Six3os1|2889|	483	2889	0.0980617	0.0122767	0	0	0	0	0	0	0	0	0	3	2	1	0	6
ENST00000321214.2|ENSG00000180422.3|OTTHUMG00000175524.2|OTTHUMT00000430368.1|LINC00304-001|LINC00304|2243|	ENSMUST00000162198.1|ENSMUSG00000090174.1|OTTMUSG00000027607.1|OTTMUST00000068333.1|Gm10612-001|Gm10612|1681|	2243	1681	0.0979914	0.0123251	1	0	1	2	0	1	5	0	0	0	0	0	0	0
ENST00000625164.1|ENSG00000278872.1|OTTHUMG00000167982.1|OTTHUMT00000397395.1|RP13-895J2.4-001|RP13-895J2.4|1645|	ENSMUST00000196305.1|ENSMUSG00000105482.1|OTTMUSG00000054214.1|OTTMUST00000134593.1|Gm42596-001|Gm42596|1958|	1645	1958	0.0979754	0.0123361	0	1	0	1	0	0	2	1	0	2	3	0	0	6
ENST00000623342.1|ENSG00000279078.1|OTTHUMG00000189460.1|OTTHUMT00000479729.1|SND1-IT1-001|SND1-IT1|2481|	ENSMUST00000194243.1|ENSMUSG00000103899.1|OTTMUSG00000044372.1|OTTMUST00000116807.1|Gm37940-001|Gm37940|3251|	2481	3251	0.0979677	0.0123414	0	0	1	1	2	1	5	1	0	0	0	0	5	6
ENST00000561123.2|ENSG00000259420.5|OTTHUMG00000172611.3|OTTHUMT00000419438.3|RP11-307C19.2-001|RP11-307C19.2|926|	ENSMUST00000181927.1|ENSMUSG00000097870.1|-|-|Gm26868-201|Gm26868|2653|	926	2653	0.0979129	0.0123793	0	0	0	1	0	0	1	0	0	0	0	0	0	0
ENST00000594810.2|ENSG00000241158.5|OTTHUMG00000158723.4|OTTHUMT00000351902.3|ADAMTS9-AS1-002|ADAMTS9-AS1|3609|	ENSMUST00000203784.1|ENSMUSG00000107655.1|OTTMUSG00000057909.1|OTTMUST00000142189.1|Gm44220-001|Gm44220|2487|	3609	2487	0.0978867	0.0123974	1	0	1	1	0	1	4	1	0	0	0	0	3	4
ENST00000530897.1|ENSG00000255153.1|OTTHUMG00000166230.1|OTTHUMT00000388546.1|TOLLIP-AS1-001|TOLLIP-AS1|939|	ENSMUST00000211351.1|ENSMUSG00000109958.1|OTTMUSG00000060199.1|OTTMUST00000147350.1|RP23-56A14.12-001|RP23-56A14.12|628|	939	628	0.0978675	0.0124108	0	0	0	1	0	0	1	0	0	1	1	0	0	2
ENST00000510017.1|ENSG00000248767.1|OTTHUMG00000160231.1|OTTHUMT00000359787.1|WI2-2373I1.2-001|WI2-2373I1.2|530|	ENSMUST00000187923.1|ENSMUSG00000075585.3|OTTMUSG00000048600.1|OTTMUST00000124503.1|6330403L08Rik-001|6330403L08Rik|5522|	530	5522	0.0978553	0.0124192	0	0	1	1	1	0	3	1	0	7	7	0	0	15
ENST00000625186.1|ENSG00000278969.1|OTTHUMG00000187475.1|OTTHUMT00000475055.1|RP11-662I13.3-001|RP11-662I13.3|2373|	ENSMUST00000180763.1|ENSMUSG00000097419.1|OTTMUSG00000057244.1|OTTMUST00000140924.1|Gm26666-001|Gm26666|2461|	2373	2461	0.0978218	0.0124425	0	0	2	0	0	0	2	0	1	2	3	0	0	6
ENST00000575722.1|ENSG00000263146.2|OTTHUMG00000178053.2|OTTHUMT00000440354.1|RP11-849I19.1-001|RP11-849I19.1|1256|	ENSMUST00000184638.1|ENSMUSG00000098720.1|OTTMUSG00000044453.1|OTTMUST00000117066.1|Gm27239-001|Gm27239|642|	1256	642	0.0977669	0.0124807	1	0	0	2	0	0	3	0	0	1	1	0	0	2
ENST00000614177.1|ENSG00000256597.2|OTTHUMG00000168424.2|OTTHUMT00000474768.1|FLJ37505-002|FLJ37505|1993|	ENSMUST00000197355.1|ENSMUSG00000105782.1|OTTMUSG00000055106.1|OTTMUST00000136466.1|Gm42955-001|Gm42955|3393|	1993	3393	0.0977097	0.0125206	0	0	0	0	0	1	1	0	0	0	0	0	3	3
ENST00000590850.1|ENSG00000267637.1|OTTHUMG00000179883.1|OTTHUMT00000448809.1|RP11-619I22.1-001|RP11-619I22.1|223|	ENSMUST00000151652.7|ENSMUSG00000086199.7|OTTMUSG00000001037.1|OTTMUST00000002075.1|Bcas3os1-002|Bcas3os1|3138|	223	3138	0.0976696	0.0125487	1	0	0	0	0	0	1	0	0	1	0	0	0	1
ENST00000413818.2|ENSG00000231119.2|OTTHUMG00000032668.2|OTTHUMT00000079599.2|RP4-569M23.2-001|RP4-569M23.2|1809|	ENSMUST00000127942.1|ENSMUSG00000086820.1|OTTMUSG00000001127.1|OTTMUST00000002212.1|Gm11465-001|Gm11465|435|	1809	435	0.0975377	0.0126414	0	0	0	0	0	0	0	0	0	0	0	0	0	0
ENST00000609552.1|ENSG00000272677.1|OTTHUMG00000186309.2|OTTHUMT00000472826.1|RP11-127B20.3-002|RP11-127B20.3|612|	ENSMUST00000166606.1|ENSMUSG00000091623.1|OTTMUSG00000036764.1|OTTMUST00000094340.1|Gm17092-001|Gm17092|698|	612	698	0.0972524	0.012844	1	2	1	1	0	0	5	0	0	1	1	0	0	2
ENST00000467458.2|ENSG00000239911.2|OTTHUMG00000157323.3|OTTHUMT00000348439.2|PRKAG2-AS1-002|PRKAG2-AS1|1064|	ENSMUST00000171190.1|ENSMUSG00000043833.6|OTTMUSG00000023556.1|-|2900005J15Rik-201|2900005J15Rik|2025|	1064	2025	0.097054	0.0129865	0	0	1	1	0	0	2	1	0	1	3	0	1	6
ENST00000425754.1|ENSG00000237919.5|OTTHUMG00000009266.1|OTTHUMT00000025692.1|RP11-181B18.1-002|RP11-181B18.1|694|	ENSMUST00000200331.1|ENSMUSG00000105683.1|OTTMUSG00000052792.1|OTTMUST00000132142.1|Gm43487-001|Gm43487|1031|	694	1031	0.0970305	0.0130035	0	0	0	0	0	0	0	0	0	0	0	0	0	0
ENST00000614509.1|ENSG00000274215.1|OTTHUMG00000187014.1|OTTHUMT00000474246.1|CTD-2313J17.6-001|CTD-2313J17.6|607|	ENSMUST00000169090.1|ENSMUSG00000091890.2|OTTMUSG00000058372.1|-|A830073O21Rik-201|A830073O21Rik|2025|	607	2025	0.0969696	0.0130476	0	0	1	1	0	0	2	0	0	3	1	0	0	4
ENST00000514599.5|ENSG00000250295.6|OTTHUMG00000164493.1|OTTHUMT00000378988.1|RDH10-AS1-001|RDH10-AS1|3261|	ENSMUST00000192560.1|ENSMUSG00000104165.1|OTTMUSG00000048074.1|OTTMUST00000123520.1|Gm38249-001|Gm38249|2321|	3261	2321	0.0968908	0.0131049	0	0	0	0	0	0	0	3	0	0	0	0	4	7
ENST00000602529.1|ENSG00000269934.1|OTTHUMG00000183901.1|OTTHUMT00000467425.1|RP5-1139B12.3-002|RP5-1139B12.3|1483|	ENSMUST00000101162.3|ENSMUSG00000072902.4|OTTMUSG00000034613.1|-|Gm10435-201|Gm10435|2878|	1483	2878	0.0966084	0.0133119	0	0	1	1	0	0	2	0	0	1	0	0	0	1
ENST00000547799.5|ENSG00000257433.5|OTTHUMG00000169669.2|OTTHUMT00000405347.1|RP1-197B17.3-001|RP1-197B17.3|3299|	ENSMUST00000149373.1|ENSMUSG00000086601.1|OTTMUSG00000032769.1|OTTMUST00000081587.1|Rapgef3os1-001|Rapgef3os1|483|	3299	483	0.0965376	0.0133643	0	0	2	3	0	1	6	0	0	1	0	0	0	1
ENST00000588469.1|ENSG00000267424.1|OTTHUMG00000180485.1|OTTHUMT00000451541.1|CTD-2265O21.3-001|CTD-2265O21.3|739|	ENSMUST00000125244.7|ENSMUSG00000087026.7|OTTMUSG00000031491.1|OTTMUST00000078021.1|A230103J11Rik-002|A230103J11Rik|1780|	739	1780	0.0962374	0.0135883	1	0	0	1	0	0	2	0	0	4	2	1	0	7
ENST00000445178.1|ENSG00000234653.1|OTTHUMG00000152840.1|OTTHUMT00000328223.1|AC079117.1-001|AC079117.1|1000|	ENSMUST00000203230.1|ENSMUSG00000107840.1|OTTMUSG00000057736.1|OTTMUST00000141808.1|Gm44241-001|Gm44241|1662|	1000	1662	0.0962362	0.0135892	0	0	0	0	0	1	1	0	0	0	0	0	2	2
ENST00000502479.1|ENSG00000249267.6|OTTHUMG00000168492.1|OTTHUMT00000399909.1|LINC00939-001|LINC00939|4972|	ENSMUST00000197355.1|ENSMUSG00000105782.1|OTTMUSG00000055106.1|OTTMUST00000136466.1|Gm42955-001|Gm42955|3393|	4972	3393	0.0961991	0.0136171	2	1	1	1	0	3	8	0	0	0	0	0	3	3
ENST00000423323.2|ENSG00000236088.9|OTTHUMG00000058771.6|OTTHUMT00000129955.2|COX10-AS1-001|COX10-AS1|3000|	ENSMUST00000130860.1|ENSMUSG00000084884.1|OTTMUSG00000005890.1|OTTMUST00000013111.1|Gm12289-001|Gm12289|2235|	3000	2235	0.0961002	0.0136917	2	0	0	0	0	3	5	0	0	0	0	0	0	0
ENST00000457336.1|ENSG00000237753.1|OTTHUMG00000153299.1|OTTHUMT00000330616.1|AC079922.3-001|AC079922.3|2022|	ENSMUST00000192413.1|ENSMUSG00000103009.1|OTTMUSG00000043412.1|OTTMUST00000113898.1|Gm4430-001|Gm4430|1943|	2022	1943	0.0960805	0.0137067	0	0	0	1	0	0	1	0	0	2	2	0	0	4
ENST00000458180.1|ENSG00000224614.1|OTTHUMG00000155738.1|OTTHUMT00000341447.1|TNK2-AS1-001|TNK2-AS1|2096|	ENSMUST00000141256.1|ENSMUSG00000075265.4|OTTMUSG00000025425.2|OTTMUST00000062603.1|Tnk2os-001|Tnk2os|1392|	2096	1392	0.0959289	0.013822	0	0	3	3	0	0	6	0	0	1	1	0	0	2
ENST00000420520.1|ENSG00000234006.1|OTTHUMG00000134293.1|OTTHUMT00000259100.1|DDX39B-AS1-001|DDX39B-AS1|516|	ENSMUST00000173576.1|ENSMUSG00000092241.1|OTTMUSG00000037940.1|OTTMUST00000097811.1|Gm20522-001|Gm20522|784|	516	784	0.0958241	0.0139022	0	0	0	1	0	0	1	0	0	1	0	0	0	1
ENST00000617183.1|ENSG00000275936.1|OTTHUMG00000187240.1|OTTHUMT00000474628.1|RP1-278C19.8-001|RP1-278C19.8|678|	ENSMUST00000202960.1|ENSMUSG00000107240.1|OTTMUSG00000056066.1|OTTMUST00000138632.1|Gm43231-001|Gm43231|2258|	678	2258	0.0957734	0.0139411	0	0	1	2	0	0	3	1	0	4	4	2	1	12
ENST00000438185.1|ENSG00000223999.1|OTTHUMG00000151209.1|OTTHUMT00000321813.1|LL22NC03-102D1.18-001|LL22NC03-102D1.18|451|	ENSMUST00000181077.1|ENSMUSG00000097764.1|-|-|Gm26635-201|Gm26635|3199|	451	3199	0.0956756	0.0140165	0	0	0	0	0	0	0	0	0	3	1	1	0	5
ENST00000609389.5|ENSG00000272568.5|OTTHUMG00000186196.1|OTTHUMT00000472401.1|CTB-113D17.1-001|CTB-113D17.1|3695|	ENSMUST00000204451.1|ENSMUSG00000108004.1|OTTMUSG00000057149.1|OTTMUST00000140732.1|Gm44080-001|Gm44080|2214|	3695	2214	0.0956127	0.0140652	0	0	0	0	0	0	0	0	0	0	0	0	0	0
ENST00000429305.1|ENSG00000232197.1|OTTHUMG00000016073.1|OTTHUMT00000043248.1|RP11-302L19.1-001|RP11-302L19.1|429|	ENSMUST00000181251.1|ENSMUSG00000097566.1|-|-|A930024N18Rik-201|A930024N18Rik|3955|	429	3955	0.0956007	0.0140745	0	0	1	0	0	0	1	1	0	6	3	0	1	11
ENST00000571305.5|ENSG00000205913.6|OTTHUMG00000177357.1|OTTHUMT00000436408.1|SRRM2-AS1-002|SRRM2-AS1|1344|	ENSMUST00000180547.1|ENSMUSG00000097006.7|-|-|9530082P21Rik-201|9530082P21Rik|1709|	1344	1709	0.0953472	0.0142724	0	0	0	0	0	0	0	0	0	0	0	0	0	0
ENST00000526906.1|ENSG00000254554.1|OTTHUMG00000165894.1|OTTHUMT00000386929.1|RP11-351I24.1-001|RP11-351I24.1|803|	ENSMUST00000209731.1|ENSMUSG00000110062.1|OTTMUSG00000034064.2|OTTMUST00000086046.2|AC122844.3-001|AC122844.3|2669|	803	2669	0.0952646	0.0143373	0	0	0	0	0	0	0	0	0	2	1	0	0	3
ENST00000419300.3|ENSG00000204054.13|OTTHUMG00000020783.9|OTTHUMT00000106519.3|LINC00963-007|LINC00963|9557|	ENSMUST00000047607.2|ENSMUSG00000039798.2|OTTMUSG00000012689.2|OTTMUST00000030250.2|2600006K01Rik-001|2600006K01Rik|1406|	9557	1406	0.0952505	0.0143485	1	0	4	3	0	2	10	0	0	0	1	0	0	1
ENST00000515178.1|ENSG00000250596.1|OTTHUMG00000160773.1|OTTHUMT00000362238.1|RP11-440I14.2-001|RP11-440I14.2|2202|	ENSMUST00000209271.1|ENSMUSG00000110397.1|OTTMUSG00000060691.1|OTTMUST00000148394.1|RP23-466C10.2-001|RP23-466C10.2|3606|	2202	3606	0.0952494	0.0143494	1	0	0	0	0	2	3	0	0	0	0	0	2	2
ENST00000624347.1|ENSG00000279946.1|OTTHUMG00000184618.1|OTTHUMT00000468968.1|CH17-76K2.6-001|CH17-76K2.6|3135|	ENSMUST00000191688.1|ENSMUSG00000102856.1|OTTMUSG00000049118.1|OTTMUST00000125397.1|Gm37084-001|Gm37084|5898|	3135	5898	0.0951752	0.014408	0	0	2	2	0	1	5	0	0	1	0	0	3	4
ENST00000512617.6|ENSG00000249859.8|OTTHUMG00000164871.1|OTTHUMT00000380708.1|PVT1-016|PVT1|383|	ENSMUST00000182141.1|ENSMUSG00000097039.8|OTTMUSG00000043115.1|OTTMUST00000113163.1|Pvt1-009|Pvt1|501|	383	501	0.0950639	0.0144964	0	0	0	0	0	0	0	0	0	0	0	0	0	0
ENST00000526150.1|ENSG00000196167.9|OTTHUMG00000166658.2|OTTHUMT00000391001.1|COLCA1-003|COLCA1|391|	ENSMUST00000186025.1|ENSMUSG00000044694.2|OTTMUSG00000045938.1|OTTMUST00000120001.1|2010007H06Rik-001|2010007H06Rik|4934|	391	4934	0.0949438	0.0145922	0	0	0	0	0	0	0	1	0	0	0	0	5	6
ENST00000498297.1|ENSG00000231305.3|OTTHUMG00000159813.1|OTTHUMT00000357491.1|RP11-723O4.2-001|RP11-723O4.2|1298|	ENSMUST00000204835.1|ENSMUSG00000108049.1|OTTMUSG00000057333.1|OTTMUST00000141075.1|Gm44168-001|Gm44168|3539|	1298	3539	0.0948933	0.0146327	0	0	0	0	0	0	0	0	0	0	0	0	0	0
ENST00000623342.1|ENSG00000279078.1|OTTHUMG00000189460.1|OTTHUMT00000479729.1|SND1-IT1-001|SND1-IT1|2481|	ENSMUST00000195742.1|ENSMUSG00000104325.1|OTTMUSG00000044369.1|OTTMUST00000116804.1|Gm37321-001|Gm37321|1872|	2481	1872	0.094762	0.0147385	0	0	1	1	2	1	5	1	0	0	0	0	4	5
ENST00000515522.1|ENSG00000249688.1|OTTHUMG00000162518.1|OTTHUMT00000369329.1|RP11-5N11.7-001|RP11-5N11.7|438|	ENSMUST00000191701.1|ENSMUSG00000103130.1|OTTMUSG00000046973.1|OTTMUST00000121724.1|F830212C03Rik-001|F830212C03Rik|2285|	438	2285	0.094639	0.0148382	0	0	1	0	0	0	1	1	0	0	0	0	1	2
ENST00000425189.1|ENSG00000225756.1|OTTHUMG00000020877.1|OTTHUMT00000054928.1|DBH-AS1-001|DBH-AS1|2139|	ENSMUST00000177012.7|ENSMUSG00000087667.8|OTTMUSG00000011675.2|OTTMUST00000111198.1|Gm13381-002|Gm13381|640|	2139	640	0.0946111	0.0148609	0	0	2	0	0	0	2	0	0	1	0	0	0	1
ENST00000595005.1|ENSG00000268518.1|OTTHUMG00000183047.1|OTTHUMT00000464785.1|CTD-2545M3.8-001|CTD-2545M3.8|626|	ENSMUST00000206342.1|ENSMUSG00000108322.1|OTTMUSG00000058747.1|OTTMUST00000144293.1|Gm45123-001|Gm45123|795|	626	795	0.0943851	0.0150458	0	0	0	0	0	0	0	0	0	0	0	0	1	1
ENST00000467398.2|ENSG00000222000.7|OTTHUMG00000153102.1|OTTHUMT00000329535.1|AC092675.3-002|AC092675.3|588|	ENSMUST00000194249.1|ENSMUSG00000103159.1|OTTMUSG00000049984.1|OTTMUST00000127192.1|F830112A20Rik-001|F830112A20Rik|3552|	588	3552	0.0942784	0.0151338	1	0	1	0	1	1	4	3	0	0	0	0	7	10
ENST00000418612.1|ENSG00000232987.1|OTTHUMG00000012473.1|OTTHUMT00000034754.1|LINC01219-001|LINC01219|722|	ENSMUST00000141681.1|ENSMUSG00000086266.1|OTTMUSG00000015000.2|OTTMUST00000035623.1|Igf2os-001|Igf2os|4778|	722	4778	0.0942481	0.0151589	0	0	0	1	0	0	1	0	0	2	3	1	0	6
ENST00000554133.5|ENSG00000272888.5|OTTHUMG00000149845.9|OTTHUMT00000415071.1|LINC01578-002|LINC01578|1776|	ENSMUST00000205707.1|ENSMUSG00000108812.1|OTTMUSG00000058343.1|OTTMUST00000143275.1|C130083A15Rik-001|C130083A15Rik|1460|	1776	1460	0.0941919	0.0152055	1	0	0	0	0	1	2	0	0	0	0	0	0	0
ENST00000445178.1|ENSG00000234653.1|OTTHUMG00000152840.1|OTTHUMT00000328223.1|AC079117.1-001|AC079117.1|1000|	ENSMUST00000203354.1|ENSMUSG00000108264.1|OTTMUSG00000057735.1|OTTMUST00000141807.1|Gm20371-001|Gm20371|1756|	1000	1756	0.0941629	0.0152297	0	0	0	0	0	1	1	0	0	0	0	0	0	0
ENST00000562996.1|ENSG00000259887.1|OTTHUMG00000172914.1|OTTHUMT00000421348.1|RP11-923I11.5-001|RP11-923I11.5|427|	ENSMUST00000071328.6|ENSMUSG00000075408.5|OTTMUSG00000046495.1|-|6030408B16Rik-201|6030408B16Rik|1155|	427	1155	0.094101	0.0152812	0	0	1	1	1	0	3	0	0	1	1	0	0	2
ENST00000622628.1|ENSG00000275457.1|OTTHUMG00000186716.1|OTTHUMT00000473664.1|RP1-198K11.5-001|RP1-198K11.5|974|	ENSMUST00000139345.1|ENSMUSG00000087618.1|OTTMUSG00000015697.1|OTTMUST00000037306.1|Gm14114-001|Gm14114|287|	974	287	0.0940893	0.015291	1	0	1	2	0	0	4	0	0	0	0	0	0	0
ENST00000562040.1|ENSG00000259989.1|OTTHUMG00000175523.1|OTTHUMT00000430364.1|CTD-2555A7.1-001|CTD-2555A7.1|472|	ENSMUST00000162198.1|ENSMUSG00000090174.1|OTTMUSG00000027607.1|OTTMUST00000068333.1|Gm10612-001|Gm10612|1681|	472	1681	0.0940155	0.0153527	0	0	0	1	0	0	1	0	0	0	0	0	0	0
ENST00000447372.1|ENSG00000226954.1|OTTHUMG00000150297.1|OTTHUMT00000317428.1|RP5-983L19.2-001|RP5-983L19.2|3775|	ENSMUST00000176338.1|ENSMUSG00000093394.1|OTTMUSG00000042062.1|OTTMUST00000110310.1|Gm20621-002|Gm20621|485|	3775	485	0.0939189	0.0154338	0	0	0	1	1	0	2	0	0	0	1	0	0	1
ENST00000535913.2|ENSG00000204044.6|OTTHUMG00000032629.3|OTTHUMT00000471537.2|RP11-465L10.10-002|RP11-465L10.10|1957|	ENSMUST00000146846.1|ENSMUSG00000086453.7|OTTMUSG00000001101.2|OTTMUST00000039119.1|Gm11457-003|Gm11457|676|	1957	676	0.0937758	0.0155547	1	0	3	3	1	0	8	0	0	0	0	0	0	0
ENST00000540533.1|ENSG00000256790.1|OTTHUMG00000168297.1|OTTHUMT00000399211.1|RP11-429A20.3-001|RP11-429A20.3|604|	ENSMUST00000192232.1|ENSMUSG00000102771.1|OTTMUSG00000047745.2|OTTMUST00000122962.2|Gm33320-001|Gm33320|530|	604	530	0.0937748	0.0155555	0	0	0	0	0	0	0	0	0	0	1	0	0	1
ENST00000570413.1|ENSG00000263167.1|OTTHUMG00000177817.1|OTTHUMT00000439045.1|RP11-149I9.2-001|RP11-149I9.2|362|	ENSMUST00000140273.1|ENSMUSG00000085636.1|OTTMUSG00000004108.1|OTTMUST00000009279.1|Gm11769-001|Gm11769|1657|	362	1657	0.0935854	0.0157168	0	0	0	0	0	0	0	1	0	2	1	0	0	4
ENST00000507035.2|ENSG00000249082.2|OTTHUMG00000163077.2|OTTHUMT00000371600.2|C5orf66-AS1-001|C5orf66-AS1|843|	ENSMUST00000154384.7|ENSMUSG00000069223.10|OTTMUSG00000027749.1|OTTMUST00000068670.1|4930451E10Rik-003|4930451E10Rik|440|	843	440	0.0935127	0.015779	1	0	2	2	0	0	5	0	0	0	0	0	0	0
ENST00000572353.1|ENSG00000262188.1|OTTHUMG00000177488.1|OTTHUMT00000437144.1|RP11-353N14.4-002|RP11-353N14.4|540|	ENSMUST00000146016.1|ENSMUSG00000085059.1|OTTMUSG00000003979.1|OTTMUST00000008840.1|Gm11750-001|Gm11750|583|	540	583	0.093452	0.0158312	0	0	0	1	0	0	1	0	0	0	0	0	0	0
ENST00000602322.1|ENSG00000269939.1|OTTHUMG00000183952.1|OTTHUMT00000467572.1|PCF11-AS1-001|PCF11-AS1|1516|	ENSMUST00000182453.1|ENSMUSG00000098041.1|OTTMUSG00000043453.1|OTTMUST00000113966.1|Gm26981-001|Gm26981|3169|	1516	3169	0.0931097	0.0161283	1	0	0	0	0	0	1	0	0	0	0	0	0	0
ENST00000486926.1|ENSG00000239791.1|OTTHUMG00000158416.1|OTTHUMT00000350976.1|AC002310.7-002|AC002310.7|950|	ENSMUST00000206759.1|ENSMUSG00000108806.1|OTTMUSG00000058500.1|OTTMUST00000143663.1|Gm44729-001|Gm44729|2052|	950	2052	0.0930764	0.0161574	0	0	1	0	0	0	1	0	0	0	2	0	0	2
ENST00000608883.1|ENSG00000273455.1|OTTHUMG00000185979.1|OTTHUMT00000471904.1|RP11-305O4.3-001|RP11-305O4.3|439|	ENSMUST00000194135.1|ENSMUSG00000104383.1|OTTMUSG00000048625.1|OTTMUST00000124541.1|Gm37553-001|Gm37553|1602|	439	1602	0.0930752	0.0161584	0	0	0	0	0	0	0	1	0	0	0	0	0	1
ENST00000440371.1|ENSG00000234595.1|OTTHUMG00000154314.1|OTTHUMT00000334806.1|AC013733.3-001|AC013733.3|635|	ENSMUST00000180703.1|ENSMUSG00000097843.1|-|-|Gm26755-201|Gm26755|2657|	635	2657	0.0929934	0.0162303	1	0	0	1	1	1	4	1	0	2	1	0	0	4
ENST00000445178.1|ENSG00000234653.1|OTTHUMG00000152840.1|OTTHUMT00000328223.1|AC079117.1-001|AC079117.1|1000|	ENSMUST00000204888.1|ENSMUSG00000107996.1|OTTMUSG00000057733.1|OTTMUST00000141805.1|Gm44228-001|Gm44228|2026|	1000	2026	0.0928897	0.0163217	0	0	0	0	0	1	1	0	1	0	0	1	1	3
ENST00000624367.3|ENSG00000279082.3|OTTHUMG00000189116.1|OTTHUMT00000478842.1|RP1-167O22.1-003|RP1-167O22.1|604|	ENSMUST00000136998.2|ENSMUSG00000086509.2|OTTMUSG00000015691.2|OTTMUST00000037295.2|Nkx2-2os-001|Nkx2-2os|4345|	604	4345	0.0927519	0.016444	0	0	0	0	0	0	0	0	1	1	0	0	1	3
ENST00000528133.1|ENSG00000254676.1|OTTHUMG00000167032.1|OTTHUMT00000392555.1|RP11-727A23.4-001|RP11-727A23.4|905|	ENSMUST00000147198.2|ENSMUSG00000074024.5|OTTMUSG00000022520.2|OTTMUST00000053931.2|4632427E13Rik-001|4632427E13Rik|6559|	905	6559	0.0927295	0.016464	0	0	0	0	0	1	1	1	0	0	0	0	1	2
ENST00000551683.2|ENSG00000279630.1|OTTHUMG00000169244.1|OTTHUMT00000403054.1|AC190387.1-001|AC190387.1|408|	ENSMUST00000129609.1|ENSMUSG00000086054.2|OTTMUSG00000014613.2|OTTMUST00000034669.1|Hnf1aos1-003|Hnf1aos1|516|	408	516	0.0927067	0.0164842	0	0	0	0	0	0	0	0	0	1	1	1	1	4
ENST00000620144.1|ENSG00000275665.1|OTTHUMG00000188499.1|OTTHUMT00000477443.1|CTB-58E17.9-001|CTB-58E17.9|563|	ENSMUST00000134289.1|ENSMUSG00000087042.1|OTTMUSG00000002721.1|OTTMUST00000005393.1|Gm11611-001|Gm11611|1326|	563	1326	0.0926638	0.0165226	0	0	0	0	0	0	0	0	0	1	1	0	0	2
ENST00000593791.1|ENSG00000268983.1|OTTHUMG00000183109.1|OTTHUMT00000465112.1|AC005253.4-001|AC005253.4|432|	ENSMUST00000211264.1|ENSMUSG00000110052.1|OTTMUSG00000061443.1|OTTMUST00000149923.1|RP23-423E20.2-001|RP23-423E20.2|889|	432	889	0.0926404	0.0165435	1	0	1	0	0	0	2	0	0	1	1	0	0	2
ENST00000509096.1|ENSG00000250150.1|OTTHUMG00000161192.1|OTTHUMT00000364116.1|RP11-436A7.1-001|RP11-436A7.1|589|	ENSMUST00000211588.1|ENSMUSG00000110308.1|OTTMUSG00000061220.1|OTTMUST00000149461.1|RP24-116G1.2-001|RP24-116G1.2|4182|	589	4182	0.0925519	0.0166229	0	0	0	0	0	0	0	0	0	1	0	0	2	3
ENST00000535922.1|ENSG00000255949.1|OTTHUMG00000168038.1|OTTHUMT00000397665.1|AP003419.16-001|AP003419.16|470|	ENSMUST00000130619.8|ENSMUSG00000024845.17|OTTMUSG00000033045.2|OTTMUST00000082485.2|Tmem134-003|Tmem134|1616|	470	1616	0.0925272	0.016645	0	0	1	1	1	0	3	0	0	0	1	0	0	1
ENST00000520360.5|ENSG00000240990.9|OTTHUMG00000158205.3|OTTHUMT00000317663.1|HOXA11-AS-001|HOXA11-AS|1289|	ENSMUST00000132559.1|ENSMUSG00000087658.2|OTTMUSG00000018870.3|OTTMUST00000065043.1|Hotairm1-001|Hotairm1|713|	1289	713	0.0923154	0.0168365	0	0	0	0	0	0	0	0	0	1	1	0	0	2
ENST00000614277.1|ENSG00000277268.1|OTTHUMG00000188447.1|OTTHUMT00000477273.1|RP11-445F12.1-003|RP11-445F12.1|640|	ENSMUST00000134800.7|ENSMUSG00000087211.7|OTTMUSG00000000977.1|OTTMUST00000001918.1|Lhx1os-002|Lhx1os|524|	640	524	0.0921383	0.0169981	0	0	1	0	0	0	1	0	0	0	0	0	0	0
ENST00000456467.1|ENSG00000236502.1|OTTHUMG00000152423.1|OTTHUMT00000326191.1|SIX3-AS1-002|SIX3-AS1|557|	ENSMUST00000176556.1|ENSMUSG00000093460.9|OTTMUSG00000040061.5|OTTMUST00000104029.1|Six3os1-002|Six3os1|4094|	557	4094	0.0920862	0.017046	0	0	0	0	0	1	1	0	0	5	3	1	0	9
ENST00000520360.5|ENSG00000240990.9|OTTHUMG00000158205.3|OTTHUMT00000317663.1|HOXA11-AS-001|HOXA11-AS|1289|	ENSMUST00000155922.1|ENSMUSG00000056445.8|OTTMUSG00000018884.3|OTTMUST00000045417.2|Hoxaas2-001|Hoxaas2|1567|	1289	1567	0.0920775	0.0170539	0	0	0	0	0	0	0	0	0	1	0	0	0	1
ENST00000585832.2|ENSG00000267493.3|OTTHUMG00000180146.3|OTTHUMT00000450013.3|CIRBP-AS1-001|CIRBP-AS1|994|	ENSMUST00000168521.1|ENSMUSG00000091994.1|OTTMUSG00000035443.1|OTTMUST00000090654.1|E130317F20Rik-001|E130317F20Rik|3265|	994	3265	0.0919973	0.0171278	0	0	2	1	1	0	4	0	0	0	1	0	0	1
ENST00000566070.1|ENSG00000259807.1|OTTHUMG00000176712.1|OTTHUMT00000433248.1|RP11-426C22.4-001|RP11-426C22.4|2099|	ENSMUST00000084587.1|ENSMUSG00000066175.2|OTTMUSG00000046564.1|-|2510046G10Rik-201|2510046G10Rik|348|	2099	348	0.0918928	0.0172244	0	1	0	0	3	1	5	0	0	1	0	0	0	1
ENST00000533822.1|ENSG00000226051.6|OTTHUMG00000018524.2|OTTHUMT00000383925.1|ZNF503-AS1-006|ZNF503-AS1|660|	ENSMUST00000193294.1|ENSMUSG00000104232.1|OTTMUSG00000047340.1|OTTMUST00000122348.1|Gm37590-001|Gm37590|603|	660	603	0.09174	0.0173667	0	0	1	0	0	0	1	0	0	1	0	0	0	1
ENST00000541574.1|ENSG00000256742.1|OTTHUMG00000169072.1|OTTHUMT00000402150.1|RP13-941N14.1-001|RP13-941N14.1|544|	ENSMUST00000148466.1|ENSMUSG00000056735.5|OTTMUSG00000026749.1|OTTMUST00000066158.1|A930024E05Rik-001|A930024E05Rik|1896|	544	1896	0.0917219	0.0173835	1	1	0	0	0	0	2	0	0	1	0	1	0	2
ENST00000437681.1|ENSG00000242125.3|OTTHUMG00000003657.2|OTTHUMT00000010374.1|SNHG3-002|SNHG3|2614|	ENSMUST00000141090.7|ENSMUSG00000085241.7|OTTMUSG00000011115.2|OTTMUST00000026025.1|Snhg3-003|Snhg3|581|	2614	581	0.0916041	0.017494	1	1	1	0	0	1	4	0	0	0	0	0	0	0
ENST00000429124.5|ENSG00000230590.7|OTTHUMG00000021850.3|OTTHUMT00000057255.2|FTX-001|FTX|2597|	ENSMUST00000193066.1|ENSMUSG00000103697.1|OTTMUSG00000043539.1|OTTMUST00000114224.1|Gm38020-001|Gm38020|4676|	2597	4676	0.0916038	0.0174942	1	0	0	0	0	1	2	1	0	0	0	0	3	4
ENST00000515213.1|ENSG00000249574.1|OTTHUMG00000160233.1|OTTHUMT00000359792.1|AC226118.1-001|AC226118.1|2146|	ENSMUST00000100518.2|ENSMUSG00000075585.3|OTTMUSG00000048600.1|-|6330403L08Rik-201|6330403L08Rik|5521|	2146	5521	0.0915966	0.0175011	0	0	0	0	0	0	0	1	0	7	7	0	0	15
ENST00000604081.1|ENSG00000250133.2|OTTHUMG00000160030.2|OTTHUMT00000408239.2|HOXC-AS2-002|HOXC-AS2|2090|	ENSMUST00000188201.1|ENSMUSG00000101588.1|OTTMUSG00000048330.1|OTTMUST00000123960.1|Gm28265-001|Gm28265|2319|	2090	2319	0.0915399	0.0175544	1	0	3	3	0	0	7	0	0	3	3	0	0	6
ENST00000382166.2|ENSG00000205865.4|OTTHUMG00000057552.1|OTTHUMT00000127917.1|FAM99B-001|FAM99B|1067|	ENSMUST00000054910.8|ENSMUSG00000043795.9|OTTMUSG00000016823.2|OTTMUST00000040867.1|Prr33-001|Prr33|2251|	1067	2251	0.0915224	0.0175709	0	0	1	1	0	0	2	0	0	3	2	0	0	5
ENST00000585593.1|ENSG00000267122.1|OTTHUMG00000180412.1|OTTHUMT00000451251.1|AC004490.1-001|AC004490.1|2738|	ENSMUST00000105760.2|ENSMUSG00000075558.3|OTTMUSG00000036740.1|OTTMUST00000094234.1|Gm17151-001|Gm17151|367|	2738	367	0.0914863	0.017605	0	0	1	2	0	0	3	0	0	0	0	0	0	0
ENST00000586808.1|ENSG00000266980.1|OTTHUMG00000179894.1|OTTHUMT00000448844.1|RP11-552F3.4-002|RP11-552F3.4|890|	ENSMUST00000180782.1|ENSMUSG00000097800.1|-|-|B230344G16Rik-201|B230344G16Rik|2024|	890	2024	0.091475	0.0176157	0	0	0	0	0	0	0	0	0	3	2	0	0	5
ENST00000429882.1|ENSG00000227432.1|OTTHUMG00000133672.1|OTTHUMT00000257847.1|AC053503.11-001|AC053503.11|519|	ENSMUST00000185727.1|ENSMUSG00000099519.1|OTTMUSG00000048529.1|OTTMUST00000124354.1|Gm29253-001|Gm29253|5231|	519	5231	0.0914732	0.0176173	0	0	2	1	0	0	3	0	0	2	2	0	0	4
ENST00000630223.2|ENSG00000230461.8|OTTHUMG00000036947.8|OTTHUMT00000480416.1|PROX1-AS1-023|PROX1-AS1|710|	ENSMUST00000110279.3|ENSMUSG00000079045.3|OTTMUSG00000040163.1|OTTMUST00000104403.1|Prox1os-001|Prox1os|828|	710	828	0.0913913	0.017695	0	0	0	0	0	0	0	0	0	0	0	0	2	2
ENST00000607641.3|ENSG00000227954.6|OTTHUMG00000015607.3|OTTHUMT00000480771.1|TARID-009|TARID|4676|	ENSMUST00000181953.1|ENSMUSG00000097108.1|OTTMUSG00000042698.1|OTTMUST00000112425.1|Gm26581-001|Gm26581|4479|	4676	4479	0.0913609	0.0177239	1	0	1	0	0	4	6	1	0	0	0	0	5	6
ENST00000623333.1|ENSG00000279771.1|OTTHUMG00000168213.2|OTTHUMT00000398855.2|AP000997.3-001|AP000997.3|2250|	ENSMUST00000209906.1|ENSMUSG00000109844.1|OTTMUSG00000060864.1|OTTMUST00000148733.1|RP23-235J18.1-005|RP23-235J18.1|575|	2250	575	0.0912547	0.0178251	1	1	2	1	0	0	5	0	0	1	1	0	0	2
ENST00000529127.5|ENSG00000254746.5|OTTHUMG00000166510.1|OTTHUMT00000390123.1|RP11-958J22.1-003|RP11-958J22.1|880|	ENSMUST00000111270.7|ENSMUSG00000075027.9|OTTMUSG00000014524.1|-|4631405J19Rik-202|4631405J19Rik|2909|	880	2909	0.0912471	0.0178323	0	0	0	1	0	0	1	0	0	1	0	0	0	1
ENST00000594418.1|ENSG00000267834.1|OTTHUMG00000183018.1|OTTHUMT00000464674.1|RP11-167N5.5-001|RP11-167N5.5|497|	ENSMUST00000205624.1|ENSMUSG00000100747.4|OTTMUSG00000045314.1|-|1700084E18Rik-201|1700084E18Rik|729|	497	729	0.0912162	0.0178619	0	0	0	0	0	0	0	0	0	1	1	0	0	2
ENST00000514506.1|ENSG00000249906.1|OTTHUMG00000161498.1|OTTHUMT00000365157.1|RP5-1029K10.2-001|RP5-1029K10.2|1221|	ENSMUST00000156822.1|ENSMUSG00000084856.1|OTTMUSG00000001753.1|OTTMUST00000003492.1|Gm11528-001|Gm11528|914|	1221	914	0.0911412	0.0179338	0	0	2	2	0	0	4	0	0	0	0	0	0	0
ENST00000475015.5|ENSG00000174403.15|OTTHUMG00000048002.2|OTTHUMT00000109266.2|C20orf166-AS1-002|C20orf166-AS1|2585|	ENSMUST00000145549.1|ENSMUSG00000084843.1|OTTMUSG00000016334.1|OTTMUST00000039249.1|B230312C02Rik-001|B230312C02Rik|1703|	2585	1703	0.091086	0.0179869	0	1	2	4	0	0	7	0	0	1	1	0	0	2
ENST00000398957.1|ENSG00000214773.1|OTTHUMG00000179466.1|OTTHUMT00000446543.1|RP11-717D12.1-001|RP11-717D12.1|1428|	ENSMUST00000197902.1|ENSMUSG00000105962.1|OTTMUSG00000051516.1|OTTMUST00000130124.1|Gm42432-001|Gm42432|1617|	1428	1617	0.0910757	0.0179969	0	0	1	0	0	1	2	1	0	1	0	0	0	2
ENST00000371086.3|ENSG00000116652.6|OTTHUMG00000008984.3|OTTHUMT00000024916.3|DLEU2L-001|DLEU2L|3555|	ENSMUST00000134206.1|ENSMUSG00000086385.1|OTTMUSG00000008024.1|OTTMUST00000018161.1|Gm12701-001|Gm12701|659|	3555	659	0.0910692	0.0180031	3	0	0	0	0	1	4	1	0	0	0	0	1	2
ENST00000507826.1|ENSG00000250326.1|OTTHUMG00000161406.1|OTTHUMT00000364807.1|RP11-284M14.1-001|RP11-284M14.1|579|	ENSMUST00000166229.2|ENSMUSG00000037982.16|OTTMUSG00000022385.2|-|Gm9725-201|Gm9725|2326|	579	2326	0.0910257	0.0180451	0	0	1	1	1	0	3	0	0	1	0	0	0	1
ENST00000470427.1|ENSG00000239801.1|OTTHUMG00000158638.1|OTTHUMT00000351593.1|DENND6A-AS1-001|DENND6A-AS1|364|	ENSMUST00000166902.1|ENSMUSG00000090861.1|OTTMUSG00000035440.1|OTTMUST00000090647.1|Arf4os-001|Arf4os|566|	364	566	0.0909031	0.0181639	0	0	0	0	0	1	1	0	0	1	1	0	0	2
ENST00000623043.1|ENSG00000230768.7|OTTHUMG00000011003.4|OTTHUMT00000479096.1|RP11-251P6.1-015|RP11-251P6.1|896|	ENSMUST00000196237.1|ENSMUSG00000105882.1|OTTMUSG00000052701.1|OTTMUST00000131973.1|Gm42905-001|Gm42905|1611|	896	1611	0.0906565	0.0184048	0	0	0	0	0	0	0	0	0	0	0	0	1	1
ENST00000562506.1|ENSG00000261276.1|OTTHUMG00000172939.1|OTTHUMT00000421415.1|RP11-554A11.5-001|RP11-554A11.5|366|	ENSMUST00000208788.1|ENSMUSG00000109305.1|OTTMUSG00000059416.2|OTTMUST00000145845.1|1810010D01Rik-001|1810010D01Rik|889|	366	889	0.0906458	0.0184153	0	0	0	0	0	0	0	0	0	0	1	0	0	1
ENST00000572036.1|ENSG00000262873.1|OTTHUMG00000177695.1|OTTHUMT00000438542.1|CTD-2561B21.11-001|CTD-2561B21.11|869|	ENSMUST00000145437.1|ENSMUSG00000075389.3|OTTMUSG00000004109.1|OTTMUST00000009281.1|2810410L24Rik-002|2810410L24Rik|646|	869	646	0.0905835	0.0184767	0	0	1	2	1	0	4	0	0	1	2	0	0	3
ENST00000506329.2|ENSG00000250230.2|OTTHUMG00000168159.1|OTTHUMT00000398515.1|RP11-855O10.2-001|RP11-855O10.2|2349|	ENSMUST00000181743.1|ENSMUSG00000097862.1|-|-|Gm26859-201|Gm26859|1852|	2349	1852	0.0905593	0.0185005	0	0	1	3	0	0	4	1	0	2	2	1	0	6
ENST00000444728.1|ENSG00000236144.6|OTTHUMG00000048104.2|OTTHUMT00000109465.2|TMEM147-AS1-001|TMEM147-AS1|487|	ENSMUST00000180820.7|ENSMUSG00000097320.8|OTTMUSG00000043103.1|OTTMUST00000113130.1|Tmem147os-001|Tmem147os|1276|	487	1276	0.0905441	0.0185155	0	0	1	1	0	0	2	0	0	0	1	0	0	1
ENST00000557729.1|ENSG00000258910.2|OTTHUMG00000170896.2|OTTHUMT00000410900.2|RP11-19E11.1-001|RP11-19E11.1|695|	ENSMUST00000185678.1|ENSMUSG00000097881.7|OTTMUSG00000049127.2|OTTMUST00000125455.1|Celrr-002|Celrr|937|	695	937	0.0905089	0.0185503	0	0	0	1	0	0	1	0	0	0	1	0	0	1
ENST00000413483.1|ENSG00000238184.1|OTTHUMG00000009760.2|OTTHUMT00000143277.1|CD81-AS1-002|CD81-AS1|1460|	ENSMUST00000155952.7|ENSMUSG00000059277.12|OTTMUSG00000018783.1|OTTMUST00000045177.1|R74862-003|R74862|2219|	1460	2219	0.0904067	0.0186517	0	0	1	1	0	0	2	0	0	2	1	0	0	3
ENST00000620908.1|ENSG00000275812.1|OTTHUMG00000187022.1|OTTHUMT00000474262.1|RP4-697K14.15-001|RP4-697K14.15|328|	ENSMUST00000189441.1|ENSMUSG00000070461.3|OTTMUSG00000046264.1|OTTMUST00000120611.1|9230112E08Rik-001|9230112E08Rik|3352|	328	3352	0.0903543	0.0187039	0	0	0	0	0	0	0	0	0	2	1	0	1	4
ENST00000432296.1|ENSG00000229989.3|OTTHUMG00000035888.2|OTTHUMT00000087434.1|MIR181A1HG-001|MIR181A1HG|930|	ENSMUST00000182127.1|ENSMUSG00000098243.3|OTTMUSG00000043189.1|OTTMUST00000113282.1|Gm4258-001|Gm4258|506|	930	506	0.0902757	0.0187824	1	0	0	0	0	1	2	0	0	0	0	0	0	0
ENST00000555332.5|ENSG00000248441.6|OTTHUMG00000171818.2|OTTHUMT00000415213.2|LINC01197-002|LINC01197|3568|	ENSMUST00000207528.1|ENSMUSG00000109548.1|OTTMUSG00000059671.1|OTTMUST00000146315.1|Gm45066-001|Gm45066|2551|	3568	2551	0.0901717	0.0188867	0	0	0	0	0	0	0	0	0	0	0	0	1	1
ENST00000609900.1|ENSG00000272870.1|OTTHUMG00000186433.1|OTTHUMT00000473142.1|RP11-798M19.6-002|RP11-798M19.6|1921|	ENSMUST00000211787.1|ENSMUSG00000110419.1|OTTMUSG00000060726.1|OTTMUST00000148450.1|RP23-383A10.9-003|RP23-383A10.9|2479|	1921	2479	0.0899487	0.019112	0	0	0	0	0	0	0	1	0	1	0	0	1	3
ENST00000471502.1|ENSG00000272679.1|OTTHUMG00000186334.1|OTTHUMT00000472950.1|RP11-216L13.18-001|RP11-216L13.18|561|	ENSMUST00000151069.1|ENSMUSG00000087612.1|OTTMUSG00000012624.1|OTTMUST00000030053.1|A230005M16Rik-002|A230005M16Rik|1022|	561	1022	0.0898353	0.0192275	0	0	1	0	0	0	1	0	1	1	1	1	1	5
ENST00000586871.5|ENSG00000221857.7|OTTHUMG00000182360.1|OTTHUMT00000460764.1|CTD-2527I21.4-002|CTD-2527I21.4|588|	ENSMUST00000207746.1|ENSMUSG00000063623.3|OTTMUSG00000059306.1|OTTMUST00000145561.1|C230062I16Rik-001|C230062I16Rik|1022|	588	1022	0.0898136	0.0192497	0	0	1	1	0	0	2	0	1	1	0	0	0	2
ENST00000520944.5|ENSG00000245910.8|OTTHUMG00000164743.4|OTTHUMT00000380022.1|SNHG6-003|SNHG6|638|	ENSMUST00000182742.1|ENSMUSG00000098234.7|OTTMUSG00000043382.2|OTTMUST00000113827.1|Snhg6-002|Snhg6|400|	638	400	0.089621	0.0194475	0	0	0	0	0	0	0	0	0	0	0	0	0	0
ENST00000629794.1|ENSG00000280936.1|OTTHUMG00000189592.1|OTTHUMT00000480037.1|RP11-358D14.3-001|RP11-358D14.3|519|	ENSMUST00000183124.1|ENSMUSG00000098051.1|OTTMUSG00000043553.1|OTTMUST00000114313.1|Gm27032-001|Gm27032|1116|	519	1116	0.0895598	0.0195106	0	0	1	1	0	0	2	0	0	1	2	0	0	3
ENST00000374983.3|ENSG00000204283.3|OTTHUMG00000177433.2|OTTHUMT00000436897.1|FLJ45079-001|FLJ45079|4678|	ENSMUST00000123882.1|ENSMUSG00000086050.1|OTTMUSG00000029404.1|OTTMUST00000072873.1|Gm16045-001|Gm16045|2969|	4678	2969	0.0895442	0.0195268	0	0	2	1	2	0	5	0	0	1	1	0	0	2
ENST00000508590.1|ENSG00000224032.6|OTTHUMG00000128803.3|OTTHUMT00000370979.1|EPB41L4A-AS1-004|EPB41L4A-AS1|292|	ENSMUST00000179138.1|ENSMUSG00000087590.2|OTTMUSG00000042342.1|OTTMUST00000111571.1|Epb41l4aos-002|Epb41l4aos|303|	292	303	0.0895399	0.0195313	0	0	0	0	0	0	0	0	0	0	0	0	0	0
ENST00000448211.1|ENSG00000226917.5|OTTHUMG00000067927.3|OTTHUMT00000145709.2|LINC01276-001|LINC01276|660|	ENSMUST00000136531.1|ENSMUSG00000086930.1|OTTMUSG00000018358.1|OTTMUST00000044347.1|Frs3os-001|Frs3os|978|	660	978	0.0895383	0.019533	0	0	1	1	2	0	4	0	0	0	0	0	0	0
ENST00000561241.1|ENSG00000259498.1|OTTHUMG00000172299.1|OTTHUMT00000417735.1|RP11-244F12.3-001|RP11-244F12.3|3354|	ENSMUST00000166507.1|ENSMUSG00000091745.1|OTTMUSG00000036129.2|OTTMUST00000092863.2|Gm17098-001|Gm17098|628|	3354	628	0.0894615	0.0196126	0	0	2	1	1	0	4	0	0	0	0	0	0	0
ENST00000623615.1|ENSG00000279047.3|OTTHUMG00000189121.1|OTTHUMT00000478853.1|CTC-270D5.1-005|CTC-270D5.1|575|	ENSMUST00000193015.1|ENSMUSG00000103985.1|OTTMUSG00000050734.1|OTTMUST00000128593.1|Gm37446-001|Gm37446|4136|	575	4136	0.0894019	0.0196746	0	0	0	0	0	0	0	1	0	0	0	0	3	4
ENST00000418834.1|ENSG00000236013.5|OTTHUMG00000015699.1|OTTHUMT00000042473.1|RP3-332B22.1-002|RP3-332B22.1|876|	ENSMUST00000208870.1|ENSMUSG00000101969.2|OTTMUSG00000046531.2|OTTMUST00000146204.1|Gm20125-006|Gm20125|1249|	876	1249	0.0893576	0.0197208	0	0	0	0	0	0	0	1	0	0	0	0	0	1
ENST00000434839.2|ENSG00000229807.10|OTTHUMG00000021839.5|OTTHUMT00000083628.2|XIST-005|XIST|2865|	ENSMUST00000193066.1|ENSMUSG00000103697.1|OTTMUSG00000043539.1|OTTMUST00000114224.1|Gm38020-001|Gm38020|4676|	2865	4676	0.0892919	0.0197896	1	1	0	0	0	3	5	1	0	0	0	0	3	4
ENST00000551399.1|ENSG00000257741.5|OTTHUMG00000170167.1|OTTHUMT00000407759.1|LINC01490-001|LINC01490|1260|	ENSMUST00000194653.1|ENSMUSG00000102934.1|OTTMUSG00000047458.1|OTTMUST00000122514.1|Gm38117-001|Gm38117|939|	1260	939	0.089247	0.0198366	1	0	0	0	0	1	2	1	0	0	0	0	1	2
ENST00000623062.1|ENSG00000278973.1|OTTHUMG00000168630.1|OTTHUMT00000400421.1|RP11-83B20.9-001|RP11-83B20.9|780|	ENSMUST00000197269.1|ENSMUSG00000105583.1|OTTMUSG00000054979.1|OTTMUST00000136250.1|Gm43777-001|Gm43777|376|	780	376	0.0891813	0.0199057	0	0	0	0	0	0	0	0	0	1	0	0	0	1
ENST00000620845.1|ENSG00000278716.1|OTTHUMG00000187072.1|OTTHUMT00000474370.1|LA16c-352F7.1-001|LA16c-352F7.1|1019|	ENSMUST00000182423.1|ENSMUSG00000097983.1|OTTMUSG00000043112.1|OTTMUST00000113149.1|Gm26971-001|Gm26971|1072|	1019	1072	0.0891711	0.0199164	0	0	0	1	0	0	1	0	0	1	1	1	0	3
ENST00000610049.1|ENSG00000273221.1|OTTHUMG00000186363.1|OTTHUMT00000473004.1|RP5-1180E21.5-001|RP5-1180E21.5|647|	ENSMUST00000194058.1|ENSMUSG00000102780.1|OTTMUSG00000052102.1|OTTMUST00000130979.1|Gm38253-001|Gm38253|4678|	647	4678	0.0891128	0.0199779	0	0	0	0	0	0	0	2	0	1	1	1	5	10
ENST00000412069.1|ENSG00000226877.7|OTTHUMG00000020108.2|OTTHUMT00000052860.1|RP11-575L7.2-004|RP11-575L7.2|424|	ENSMUST00000180452.7|ENSMUSG00000097399.7|OTTMUSG00000046946.1|OTTMUST00000121674.1|Gm26555-002|Gm26555|1037|	424	1037	0.0890104	0.0200862	0	0	0	0	0	0	0	0	0	0	0	0	0	0
ENST00000547799.5|ENSG00000257433.5|OTTHUMG00000169669.2|OTTHUMT00000405347.1|RP1-197B17.3-001|RP1-197B17.3|3299|	ENSMUST00000124374.1|ENSMUSG00000087397.1|OTTMUSG00000032768.2|OTTMUST00000081586.2|Rapgef3os2-001|Rapgef3os2|920|	3299	920	0.0888428	0.0202647	0	0	2	3	0	1	6	0	0	1	1	0	0	2
ENST00000505661.1|ENSG00000250432.5|OTTHUMG00000160026.1|OTTHUMT00000358941.1|RP11-834C11.5-003|RP11-834C11.5|410|	ENSMUST00000188137.1|ENSMUSG00000101356.1|OTTMUSG00000048329.1|OTTMUST00000123959.1|Gm28876-001|Gm28876|703|	410	703	0.0888208	0.0202883	0	0	0	0	0	0	0	0	0	1	0	0	0	1
ENST00000561847.2|ENSG00000260293.2|OTTHUMG00000177151.2|OTTHUMT00000435642.2|RP11-715J22.6-001|RP11-715J22.6|5616|	ENSMUST00000161395.1|ENSMUSG00000089697.1|OTTMUSG00000028091.1|OTTMUST00000069591.1|Gm15947-001|Gm15947|2742|	5616	2742	0.0888207	0.0202884	0	0	1	0	0	0	1	0	0	0	2	0	0	2
ENST00000620496.1|ENSG00000275476.1|OTTHUMG00000187170.1|OTTHUMT00000474523.1|RP11-996F15.4-001|RP11-996F15.4|486|	ENSMUST00000203708.1|ENSMUSG00000107706.1|OTTMUSG00000057524.1|OTTMUST00000141445.1|Gm44022-001|Gm44022|5429|	486	5429	0.0887247	0.0203914	0	0	0	0	0	1	1	1	0	0	0	1	4	6
ENST00000624284.1|ENSG00000279748.1|OTTHUMG00000182562.1|OTTHUMT00000462446.1|CTD-3222D19.9-001|CTD-3222D19.9|2505|	ENSMUST00000181452.1|ENSMUSG00000097000.1|-|-|Gm17435-201|Gm17435|2994|	2505	2994	0.0886202	0.020504	0	0	2	1	0	0	3	0	0	0	0	0	0	0
ENST00000573346.5|ENSG00000262580.5|OTTHUMG00000177568.3|OTTHUMT00000437688.1|RP11-334C17.5-001|RP11-334C17.5|801|	ENSMUST00000156576.1|ENSMUSG00000086306.1|OTTMUSG00000004003.1|OTTMUST00000008893.1|Gm11754-001|Gm11754|661|	801	661	0.0885324	0.020599	0	0	0	1	0	0	1	0	0	0	0	0	0	0
ENST00000572353.1|ENSG00000262188.1|OTTHUMG00000177488.1|OTTHUMT00000437144.1|RP11-353N14.4-002|RP11-353N14.4|540|	ENSMUST00000181119.1|ENSMUSG00000097294.1|-|-|Gm26888-201|Gm26888|3683|	540	3683	0.0884909	0.0206441	0	0	0	1	0	0	1	0	0	1	1	0	0	2
ENST00000591665.1|ENSG00000267577.1|OTTHUMG00000180668.2|OTTHUMT00000452499.2|CTD-2587H24.5-001|CTD-2587H24.5|1643|	ENSMUST00000205662.1|ENSMUSG00000085725.2|OTTMUSG00000027088.2|OTTMUST00000143107.1|Gm15873-002|Gm15873|651|	1643	651	0.0884638	0.0206735	0	1	1	0	0	0	2	0	0	0	1	0	0	1
ENST00000558027.1|ENSG00000259349.1|OTTHUMG00000172047.1|OTTHUMT00000416618.1|RP11-15E18.1-001|RP11-15E18.1|553|	ENSMUST00000206972.1|ENSMUSG00000085628.4|OTTMUSG00000001032.1|-|Appbp2os-201|Appbp2os|447|	553	447	0.0884426	0.0206966	1	0	0	0	0	0	1	0	1	1	0	0	0	2
ENST00000523331.1|ENSG00000253508.1|OTTHUMG00000170067.1|OTTHUMT00000358744.1|RP1-170O19.14-001|RP1-170O19.14|556|	ENSMUST00000141850.1|ENSMUSG00000086427.8|OTTMUSG00000018876.2|OTTMUST00000045401.1|Hoxa11os-002|Hoxa11os|1065|	556	1065	0.0883775	0.0207676	1	0	1	1	0	1	4	1	0	2	0	0	0	3
ENST00000617703.1|ENSG00000277496.1|OTTHUMG00000186991.1|OTTHUMT00000474199.1|RP11-93B14.9-001|RP11-93B14.9|1807|	ENSMUST00000145549.1|ENSMUSG00000084843.1|OTTMUSG00000016334.1|OTTMUST00000039249.1|B230312C02Rik-001|B230312C02Rik|1703|	1807	1703	0.0883543	0.020793	0	0	0	0	0	0	0	0	0	1	1	0	0	2
ENST00000576859.1|ENSG00000262098.1|OTTHUMG00000177696.1|OTTHUMT00000438543.1|CTD-2561B21.10-001|CTD-2561B21.10|368|	ENSMUST00000145437.1|ENSMUSG00000075389.3|OTTMUSG00000004109.1|OTTMUST00000009281.1|2810410L24Rik-002|2810410L24Rik|646|	368	646	0.0883128	0.0208385	0	0	0	0	0	0	0	0	0	1	2	0	0	3
ENST00000579125.1|ENSG00000215769.8|OTTHUMG00000179291.1|OTTHUMT00000445592.1|RP13-104F24.2-002|RP13-104F24.2|1318|	ENSMUST00000150366.1|ENSMUSG00000086481.1|OTTMUSG00000003585.1|OTTMUST00000007727.1|Gm11707-001|Gm11707|490|	1318	490	0.0881241	0.0210461	0	0	1	3	0	0	4	0	0	0	0	0	0	0
ENST00000623122.1|ENSG00000278916.1|OTTHUMG00000170256.1|OTTHUMT00000408214.1|CEP83-AS1-001|CEP83-AS1|2482|	ENSMUST00000181906.1|ENSMUSG00000097164.1|-|-|Cep83os-201|Cep83os|4135|	2482	4135	0.0880621	0.0211147	1	0	1	1	0	1	4	1	0	0	0	1	3	5
ENST00000450514.5|ENSG00000232940.5|OTTHUMG00000031170.3|OTTHUMT00000076316.3|HCG25-001|HCG25|759|	ENSMUST00000168978.1|ENSMUSG00000092595.1|OTTMUSG00000037088.1|OTTMUST00000095471.1|Gm20427-001|Gm20427|3703|	759	3703	0.0880237	0.0211573	0	0	0	0	0	0	0	1	0	1	0	0	0	2
ENST00000507217.5|ENSG00000250049.5|OTTHUMG00000162609.2|OTTHUMT00000369754.2|RP11-348J24.2-001|RP11-348J24.2|576|	ENSMUST00000187731.1|ENSMUSG00000100168.1|OTTMUSG00000046947.1|OTTMUST00000121677.1|Gm28526-001|Gm28526|339|	576	339	0.0879666	0.0212208	0	0	0	0	0	0	0	0	0	0	0	0	0	0
ENST00000432418.1|ENSG00000224842.2|OTTHUMG00000020690.2|OTTHUMT00000054120.1|RP11-123K19.1-003|RP11-123K19.1|423|	ENSMUST00000147294.2|ENSMUSG00000052951.5|OTTMUSG00000012586.2|OTTMUST00000029987.2|C130021I20Rik-001|C130021I20Rik|3693|	423	3693	0.0879535	0.0212354	0	0	0	0	0	0	0	1	0	4	0	0	1	6
ENST00000548801.1|ENSG00000257178.4|OTTHUMG00000170223.1|OTTHUMT00000408085.1|MIR10A-001|MIR10A|2630|	ENSMUST00000129907.2|ENSMUSG00000078706.4|OTTMUSG00000001985.3|OTTMUST00000003986.3|Gm53-001|Gm53|1172|	2630	1172	0.0879141	0.0212793	1	0	1	2	0	0	4	1	0	1	0	0	1	3
ENST00000414210.5|ENSG00000228750.6|OTTHUMG00000001785.2|OTTHUMT00000004979.1|RP11-242F24.1-002|RP11-242F24.1|507|	ENSMUST00000191938.1|ENSMUSG00000104142.1|OTTMUSG00000047744.1|OTTMUST00000122961.1|Gm37141-001|Gm37141|422|	507	422	0.0878681	0.0213307	0	0	0	0	0	0	0	0	0	1	1	0	0	2
ENST00000553174.1|ENSG00000257346.1|OTTHUMG00000170409.1|OTTHUMT00000408974.1|RP11-386G11.8-001|RP11-386G11.8|717|	ENSMUST00000181510.1|ENSMUSG00000097414.1|-|-|B130046B21Rik-201|B130046B21Rik|2216|	717	2216	0.0876703	0.0215528	0	0	1	1	0	0	2	0	0	1	0	0	0	1
ENST00000517676.1|ENSG00000253764.1|OTTHUMG00000163628.1|OTTHUMT00000374599.1|RP11-439C15.4-002|RP11-439C15.4|557|	ENSMUST00000192473.1|ENSMUSG00000102615.1|OTTMUSG00000044894.1|OTTMUST00000117984.1|Gm37844-001|Gm37844|4097|	557	4097	0.0873381	0.0219305	1	0	1	0	0	0	2	0	0	5	3	0	0	8
ENST00000568106.1|ENSG00000261505.1|OTTHUMG00000176428.1|OTTHUMT00000432004.1|LA16c-358B7.3-002|LA16c-358B7.3|3107|	ENSMUST00000163493.2|ENSMUSG00000091475.2|OTTMUSG00000038221.2|OTTMUST00000098396.2|2810468N07Rik-001|2810468N07Rik|1349|	3107	1349	0.0873226	0.0219483	0	0	3	1	0	0	4	0	0	0	1	0	0	1
ENST00000624746.1|ENSG00000280048.1|OTTHUMG00000172931.1|OTTHUMT00000421370.1|RP11-327J17.7-001|RP11-327J17.7|3424|	ENSMUST00000207627.1|ENSMUSG00000109021.1|OTTMUSG00000059663.1|OTTMUST00000146289.1|Gm44812-001|Gm44812|5349|	3424	5349	0.0872775	0.0220001	0	0	0	1	0	0	1	0	0	0	0	0	0	0
ENST00000605981.1|ENSG00000271938.1|OTTHUMG00000185448.1|OTTHUMT00000470544.1|RP11-589C21.6-001|RP11-589C21.6|292|	ENSMUST00000186344.1|ENSMUSG00000054822.5|OTTMUSG00000045222.1|OTTMUST00000118812.1|1700041G16Rik-001|1700041G16Rik|1824|	292	1824	0.0872589	0.0220215	0	1	0	0	0	0	1	0	0	0	0	0	0	0
ENST00000500765.1|ENSG00000248019.2|OTTHUMG00000161035.1|OTTHUMT00000363504.1|FAM13A-AS1-002|FAM13A-AS1|3210|	ENSMUST00000204395.1|ENSMUSG00000108075.1|OTTMUSG00000057707.1|OTTMUST00000141764.1|Gm45061-001|Gm45061|2095|	3210	2095	0.0871598	0.0221356	0	0	0	0	1	1	2	1	0	0	0	0	0	1
ENST00000399387.8|ENSG00000186960.10|OTTHUMG00000029410.6|OTTHUMT00000134019.3|LINC01551-003|LINC01551|1581|	ENSMUST00000127041.2|ENSMUSG00000104861.1|OTTMUSG00000054992.2|OTTMUST00000050037.2|3110039M20Rik-001|3110039M20Rik|868|	1581	868	0.0871531	0.0221434	0	0	0	0	0	0	0	0	0	0	0	0	0	0
ENST00000453121.1|ENSG00000228853.1|OTTHUMG00000009732.1|OTTHUMT00000026852.1|NEGR1-IT1-001|NEGR1-IT1|534|	ENSMUST00000199676.1|ENSMUSG00000106385.1|OTTMUSG00000052339.1|OTTMUST00000131377.1|Gm42943-001|Gm42943|3242|	534	3242	0.08682	0.0225311	1	0	0	0	0	2	3	2	0	0	0	0	2	4
ENST00000607802.1|ENSG00000272259.5|OTTHUMG00000185413.1|OTTHUMT00000470475.1|RP11-305P22.9-001|RP11-305P22.9|3408|	ENSMUST00000189441.1|ENSMUSG00000070461.3|OTTMUSG00000046264.1|OTTMUST00000120611.1|9230112E08Rik-001|9230112E08Rik|3352|	3408	3352	0.0867172	0.022652	0	1	0	2	0	0	3	0	0	2	1	0	1	4
ENST00000430166.5|ENSG00000225733.5|OTTHUMG00000155555.1|OTTHUMT00000340623.1|FGD5-AS1-001|FGD5-AS1|1184|	ENSMUST00000205549.1|ENSMUSG00000108574.1|OTTMUSG00000058003.1|OTTMUST00000142354.1|Gm44981-001|Gm44981|1943|	1184	1943	0.0866471	0.0227347	1	0	1	1	0	0	3	0	0	1	0	1	0	2
ENST00000462531.1|ENSG00000241336.1|OTTHUMG00000158465.1|OTTHUMT00000351102.1|LINC01487-001|LINC01487|905|	ENSMUST00000192500.1|ENSMUSG00000104336.1|OTTMUSG00000051888.1|OTTMUST00000130648.1|Gm34240-001|Gm34240|1936|	905	1936	0.0864034	0.0230243	0	0	0	0	0	0	0	0	0	0	0	1	2	3
ENST00000419143.1|ENSG00000230937.10|OTTHUMG00000036267.5|OTTHUMT00000088521.1|MIR205HG-006|MIR205HG|971|	ENSMUST00000180420.2|ENSMUSG00000097850.2|OTTMUSG00000042877.2|OTTMUST00000112665.2|4631405K08Rik-001|4631405K08Rik|2112|	971	2112	0.0863911	0.023039	0	0	0	0	0	0	0	1	0	1	0	0	2	4
ENST00000424148.1|ENSG00000233930.3|OTTHUMG00000165546.3|OTTHUMT00000384772.1|KRTAP5-AS1-001|KRTAP5-AS1|2265|	ENSMUST00000211351.1|ENSMUSG00000109958.1|OTTMUSG00000060199.1|OTTMUST00000147350.1|RP23-56A14.12-001|RP23-56A14.12|628|	2265	628	0.0863858	0.0230453	0	0	2	1	0	1	4	0	0	1	1	0	0	2
ENST00000413913.2|ENSG00000238268.2|OTTHUMG00000020963.2|OTTHUMT00000055219.2|RP11-229P13.19-001|RP11-229P13.19|686|	ENSMUST00000151069.1|ENSMUSG00000087612.1|OTTMUSG00000012624.1|OTTMUST00000030053.1|A230005M16Rik-002|A230005M16Rik|1022|	686	1022	0.086361	0.023075	0	0	1	2	0	0	3	0	1	1	1	1	1	5
ENST00000596472.1|ENSG00000268677.1|OTTHUMG00000183248.1|OTTHUMT00000465793.1|CTB-33G10.6-001|CTB-33G10.6|427|	ENSMUST00000207515.1|ENSMUSG00000109111.1|OTTMUSG00000058337.2|OTTMUST00000143249.1|6530437J22Rik-001|6530437J22Rik|773|	427	773	0.0863059	0.0231411	0	0	1	1	0	0	2	0	0	1	0	0	0	1
ENST00000444217.1|ENSG00000231636.1|OTTHUMG00000151996.1|OTTHUMT00000324732.1|AGBL5-AS1-001|AGBL5-AS1|407|	ENSMUST00000202534.1|ENSMUSG00000107086.1|OTTMUSG00000055541.1|OTTMUST00000137464.1|Gm43808-001|Gm43808|2065|	407	2065	0.0862371	0.0232238	1	0	1	1	1	0	4	0	0	1	1	0	1	3
ENST00000507582.1|ENSG00000250056.5|OTTHUMG00000161680.1|OTTHUMT00000365710.1|LINC01018-002|LINC01018|2223|	ENSMUST00000168625.1|ENSMUSG00000091133.1|OTTMUSG00000035509.1|OTTMUST00000090931.1|Gm17108-001|Gm17108|2877|	2223	2877	0.0862099	0.0232565	0	0	0	2	0	0	2	0	1	2	2	0	0	5
ENST00000422107.1|ENSG00000228988.1|OTTHUMG00000009341.1|OTTHUMT00000025888.1|RP4-677H15.4-001|RP4-677H15.4|457|	ENSMUST00000199446.1|ENSMUSG00000105643.1|OTTMUSG00000052652.1|OTTMUST00000131913.1|Gm42611-001|Gm42611|3407|	457	3407	0.0860265	0.0234786	1	0	0	0	0	0	1	1	0	0	0	0	1	2
ENST00000455228.1|ENSG00000227744.4|OTTHUMG00000152837.1|OTTHUMT00000328214.1|FLJ43879-001|FLJ43879|3489|	ENSMUST00000187564.1|ENSMUSG00000100980.1|OTTMUSG00000048551.1|OTTMUST00000124402.1|Gm29100-001|Gm29100|4410|	3489	4410	0.0860148	0.0234928	0	0	1	1	0	0	2	0	0	3	0	0	0	3
ENST00000446992.1|ENSG00000235717.1|OTTHUMG00000153283.1|OTTHUMT00000330542.1|DPP10-AS2-001|DPP10-AS2|624|	ENSMUST00000195879.1|ENSMUSG00000102902.1|OTTMUSG00000049229.1|OTTMUST00000125581.1|Gm38263-001|Gm38263|3059|	624	3059	0.0859803	0.0235348	0	0	0	0	0	0	0	2	0	1	0	0	3	6
ENST00000590086.2|ENSG00000267372.2|OTTHUMG00000180149.5|OTTHUMT00000450017.5|AC005330.2-001|AC005330.2|1238|	ENSMUST00000194078.1|ENSMUSG00000104429.1|OTTMUSG00000044534.1|OTTMUST00000117215.1|2610034O05Rik-001|2610034O05Rik|855|	1238	855	0.0859155	0.0236138	0	0	0	0	0	1	1	0	0	0	0	0	0	0
ENST00000439451.1|ENSG00000235914.1|OTTHUMG00000031920.1|OTTHUMT00000078092.1|MACROD2-AS1-002|MACROD2-AS1|1230|	ENSMUST00000151538.1|ENSMUSG00000086450.1|OTTMUSG00000015598.2|OTTMUST00000037046.2|Macrod2os1-001|Macrod2os1|3131|	1230	3131	0.0858525	0.0236909	1	0	0	0	0	1	2	2	0	0	0	0	1	3
ENST00000623371.1|ENSG00000279415.1|OTTHUMG00000177274.1|OTTHUMT00000436078.1|RP11-1102P22.1-001|RP11-1102P22.1|978|	ENSMUST00000205957.1|ENSMUSG00000108693.1|OTTMUSG00000058809.1|OTTMUST00000144396.1|Gm45153-001|Gm45153|1901|	978	1901	0.0858378	0.0237089	0	0	0	0	0	1	1	0	0	0	2	0	2	4
ENST00000446789.2|ENSG00000235280.2|OTTHUMG00000057130.2|OTTHUMT00000127248.2|MCF2L-AS1-001|MCF2L-AS1|712|	ENSMUST00000123920.1|ENSMUSG00000086770.1|OTTMUSG00000020613.1|OTTMUST00000048841.1|Gm15351-001|Gm15351|419|	712	419	0.0856955	0.0238839	0	0	0	0	0	0	0	0	0	0	1	0	0	1
ENST00000624597.1|ENSG00000279940.1|OTTHUMG00000168340.1|OTTHUMT00000399371.1|RP11-243M5.5-001|RP11-243M5.5|1648|	ENSMUST00000199847.1|ENSMUSG00000104873.1|OTTMUSG00000055314.1|OTTMUST00000136924.1|Gm42978-001|Gm42978|938|	1648	938	0.0854936	0.0241342	0	2	0	1	2	0	5	2	1	1	0	0	0	4
ENST00000506429.1|ENSG00000248533.1|OTTHUMG00000162105.1|OTTHUMT00000367333.1|CTD-2130F23.1-001|CTD-2130F23.1|487|	ENSMUST00000194645.1|ENSMUSG00000103142.1|OTTMUSG00000047327.1|OTTMUST00000122332.1|Gm37743-001|Gm37743|376|	487	376	0.0853494	0.0243143	0	0	0	0	0	0	0	0	0	0	0	0	0	0
ENST00000424174.1|ENSG00000228008.1|OTTHUMG00000156735.2|OTTHUMT00000345526.2|CTD-2330K9.3-002|CTD-2330K9.3|422|	ENSMUST00000181099.1|ENSMUSG00000097099.2|OTTMUSG00000050868.2|OTTMUST00000128891.1|Gm9917-003|Gm9917|1499|	422	1499	0.0852676	0.024417	0	0	0	0	0	0	0	1	0	0	1	0	0	2
ENST00000598322.1|ENSG00000269825.1|OTTHUMG00000182793.1|OTTHUMT00000463714.1|CTD-3099C6.9-001|CTD-3099C6.9|2848|	ENSMUST00000180842.1|ENSMUSG00000097781.1|-|-|9330136K24Rik-201|9330136K24Rik|2478|	2848	2478	0.085264	0.0244215	0	0	0	0	0	0	0	1	0	0	0	0	0	1
ENST00000563737.1|ENSG00000260619.1|OTTHUMG00000173021.1|OTTHUMT00000421740.1|RP11-775C24.3-001|RP11-775C24.3|2455|	ENSMUST00000207920.1|ENSMUSG00000109452.1|OTTMUSG00000059265.1|OTTMUST00000145448.1|Gm44530-001|Gm44530|3559|	2455	3559	0.0852366	0.024456	0	0	0	0	0	0	0	0	0	0	0	0	0	0
ENST00000449519.1|ENSG00000226239.1|OTTHUMG00000032202.1|OTTHUMT00000078601.1|RP1-310O13.7-001|RP1-310O13.7|2013|	ENSMUST00000130021.2|ENSMUSG00000089898.2|OTTMUSG00000015922.3|OTTMUST00000037823.3|Gm14199-001|Gm14199|495|	2013	495	0.0852141	0.0244843	0	0	2	2	1	2	7	0	0	0	0	0	0	0
ENST00000413035.5|ENSG00000231871.5|OTTHUMG00000035809.1|OTTHUMT00000087101.1|IPO9-AS1-001|IPO9-AS1|839|	ENSMUST00000067468.5|ENSMUSG00000054412.5|OTTMUSG00000049807.1|OTTMUST00000126861.1|Gm4793-001|Gm4793|2616|	839	2616	0.0852116	0.0244874	0	0	1	1	0	0	2	0	0	0	0	0	0	0
ENST00000372490.3|ENSG00000204055.4|OTTHUMG00000046130.3|OTTHUMT00000106416.1|RP11-247A12.2-001|RP11-247A12.2|2047|	ENSMUST00000145389.2|ENSMUSG00000085224.2|OTTMUSG00000012072.2|OTTMUST00000028723.2|Gm13425-001|Gm13425|5391|	2047	5391	0.08508	0.0246538	0	0	1	1	0	0	2	1	0	6	6	0	0	13
ENST00000462801.1|ENSG00000244302.1|OTTHUMG00000157364.1|OTTHUMT00000348593.1|PEX5L-AS2-001|PEX5L-AS2|630|	ENSMUST00000125494.1|ENSMUSG00000087625.1|OTTMUSG00000023455.1|OTTMUST00000057026.1|4930419G24Rik-001|4930419G24Rik|1058|	630	1058	0.0850097	0.0247431	0	0	0	0	0	0	0	0	0	0	0	0	0	0
ENST00000608025.2|ENSG00000273253.2|OTTHUMG00000186123.4|OTTHUMT00000472292.3|RP3-402G11.26-001|RP3-402G11.26|1001|	ENSMUST00000181384.1|ENSMUSG00000097578.1|-|-|Gm26798-201|Gm26798|2837|	1001	2837	0.0849831	0.0247769	1	0	1	1	0	0	3	0	1	1	1	0	0	3
ENST00000609881.1|ENSG00000273004.1|OTTHUMG00000186480.1|OTTHUMT00000473221.1|GS1-279B7.2-001|GS1-279B7.2|752|	ENSMUST00000186597.1|ENSMUSG00000100954.4|OTTMUSG00000049559.1|OTTMUST00000126310.1|Gm10138-001|Gm10138|2498|	752	2498	0.0849308	0.0248437	0	0	0	0	0	0	0	1	0	3	2	0	1	7
ENST00000499667.6|ENSG00000245067.6|OTTHUMG00000161143.4|OTTHUMT00000363941.3|IGFBP7-AS1-001|IGFBP7-AS1|1389|	ENSMUST00000201899.1|ENSMUSG00000106985.1|OTTMUSG00000056137.1|OTTMUST00000138806.1|Gm42761-001|Gm42761|738|	1389	738	0.0849154	0.0248633	1	0	0	0	0	0	1	0	0	0	0	0	0	0
ENST00000554749.1|ENSG00000258634.3|OTTHUMG00000170608.1|OTTHUMT00000409809.1|RP4-773N10.4-001|RP4-773N10.4|4216|	ENSMUST00000131345.7|ENSMUSG00000086968.8|OTTMUSG00000033696.3|OTTMUST00000084875.1|4933431E20Rik-001|4933431E20Rik|5407|	4216	5407	0.084867	0.0249252	0	0	1	1	0	2	4	1	0	3	3	0	0	7
ENST00000598573.1|ENSG00000229240.8|OTTHUMG00000017661.7|OTTHUMT00000460942.1|LINC00710-004|LINC00710|666|	ENSMUST00000193124.1|ENSMUSG00000103412.1|OTTMUSG00000047289.1|OTTMUST00000122265.1|Gm37340-001|Gm37340|759|	666	759	0.0848466	0.0249514	0	0	0	0	0	0	0	0	0	0	0	0	0	0
ENST00000606398.1|ENSG00000272479.1|OTTHUMG00000185447.1|OTTHUMT00000470543.1|RP11-301G7.1-001|RP11-301G7.1|594|	ENSMUST00000207606.1|ENSMUSG00000109419.1|OTTMUSG00000059395.1|OTTMUST00000145796.1|Gm45163-001|Gm45163|3987|	594	3987	0.0847366	0.0250926	0	0	0	0	0	0	0	1	0	1	0	0	1	3
ENST00000599904.2|ENSG00000267882.2|OTTHUMG00000187320.2|OTTHUMT00000474757.2|RP4-569M23.5-001|RP4-569M23.5|2253|	ENSMUST00000155786.1|ENSMUSG00000085274.1|OTTMUSG00000001121.1|OTTMUST00000002195.1|BC046401-001|BC046401|847|	2253	847	0.0846778	0.0251685	0	0	1	0	0	0	1	0	0	0	1	0	0	1
ENST00000425358.2|ENSG00000233429.9|OTTHUMG00000158089.4|OTTHUMT00000137960.1|HOTAIRM1-004|HOTAIRM1|637|	ENSMUST00000155922.1|ENSMUSG00000056445.8|OTTMUSG00000018884.3|OTTMUST00000045417.2|Hoxaas2-001|Hoxaas2|1567|	637	1567	0.0845959	0.0252745	0	0	1	1	0	0	2	0	0	1	0	0	0	1
ENST00000624192.1|ENSG00000280029.3|OTTHUMG00000189123.3|OTTHUMT00000478870.1|CH17-140K24.2-001|CH17-140K24.2|573|	ENSMUST00000193015.1|ENSMUSG00000103985.1|OTTMUSG00000050734.1|OTTMUST00000128593.1|Gm37446-001|Gm37446|4136|	573	4136	0.0845436	0.0253423	1	1	1	1	0	0	4	1	0	0	0	0	3	4
ENST00000623157.1|ENSG00000279778.1|OTTHUMG00000175865.1|OTTHUMT00000431198.1|RP11-60A14.1-001|RP11-60A14.1|3087|	ENSMUST00000197226.4|ENSMUSG00000105923.4|OTTMUSG00000054945.1|OTTMUST00000136181.1|A830019L24Rik-001|A830019L24Rik|1652|	3087	1652	0.0844629	0.0254473	0	0	0	0	0	3	3	0	0	0	0	0	2	2
ENST00000601618.1|ENSG00000269148.1|OTTHUMG00000182483.1|OTTHUMT00000461680.1|AC092301.3-001|AC092301.3|764|	ENSMUST00000181954.1|ENSMUSG00000097038.1|-|-|Gm26821-201|Gm26821|2652|	764	2652	0.0844023	0.0255264	0	0	0	0	0	0	0	0	0	1	0	0	0	1
ENST00000562343.2|ENSG00000261586.2|OTTHUMG00000175692.2|OTTHUMT00000430848.2|RP11-923I11.6-001|RP11-923I11.6|2094|	ENSMUST00000160960.1|ENSMUSG00000090062.1|OTTMUSG00000035002.1|OTTMUST00000089009.1|Galnt6os-001|Galnt6os|1389|	2094	1389	0.08439	0.0255424	0	0	3	3	0	0	6	0	0	1	1	0	0	2
ENST00000564508.2|ENSG00000260664.2|OTTHUMG00000173458.2|OTTHUMT00000423200.2|AC004158.3-001|AC004158.3|4319|	ENSMUST00000209663.1|ENSMUSG00000109868.1|OTTMUSG00000060504.2|OTTMUST00000148016.1|RP23-143B2.1-001|RP23-143B2.1|1940|	4319	1940	0.0843389	0.0256093	1	1	0	0	0	1	3	1	0	0	0	1	0	2
ENST00000589818.1|ENSG00000267762.1|OTTHUMG00000179906.1|OTTHUMT00000448894.1|RP11-426J5.2-001|RP11-426J5.2|465|	ENSMUST00000181913.1|ENSMUSG00000097712.1|-|-|Gm10532-201|Gm10532|2301|	465	2301	0.084319	0.0256354	1	0	0	0	0	0	1	0	0	1	0	0	1	2
ENST00000567096.1|ENSG00000259840.1|OTTHUMG00000172953.1|OTTHUMT00000421462.1|LA16c-380A1.1-001|LA16c-380A1.1|446|	ENSMUST00000180868.1|ENSMUSG00000097518.1|-|-|Gm26694-201|Gm26694|1902|	446	1902	0.0843175	0.0256374	0	0	0	0	0	0	0	0	0	0	1	0	0	1
ENST00000547902.2|ENSG00000257253.2|OTTHUMG00000169707.2|OTTHUMT00000405533.2|RP11-70F11.7-001|RP11-70F11.7|722|	ENSMUST00000159738.1|ENSMUSG00000089968.1|OTTMUSG00000034990.1|OTTMUST00000088980.1|Nckap5los-001|Nckap5los|1712|	722	1712	0.0843057	0.0256528	0	0	0	0	0	0	0	0	0	0	3	0	0	3
ENST00000581153.1|ENSG00000263718.2|OTTHUMG00000177704.1|OTTHUMT00000438609.1|RP11-285E9.6-001|RP11-285E9.6|695|	ENSMUST00000125607.1|ENSMUSG00000085434.1|OTTMUSG00000003731.1|OTTMUST00000008122.1|Gm11725-001|Gm11725|1850|	695	1850	0.0842259	0.0257577	0	0	0	0	0	0	0	0	0	0	0	0	0	0
ENST00000555023.1|ENSG00000258754.7|OTTHUMG00000171808.3|OTTHUMT00000415175.2|LINC01579-008|LINC01579|400|	ENSMUST00000192910.1|ENSMUSG00000103673.1|OTTMUSG00000047747.1|OTTMUST00000122964.1|Gm37620-001|Gm37620|501|	400	501	0.0841967	0.0257963	0	0	0	0	0	0	0	0	0	0	0	0	0	0
ENST00000623257.1|ENSG00000279605.1|OTTHUMG00000165144.1|OTTHUMT00000382170.1|RP11-661A12.8-001|RP11-661A12.8|4947|	ENSMUST00000146755.1|ENSMUSG00000085523.1|OTTMUSG00000028072.1|OTTMUST00000069532.1|Gm15945-001|Gm15945|810|	4947	810	0.0841015	0.0259221	1	0	3	4	0	0	8	0	0	0	0	0	0	0
ENST00000527550.1|ENSG00000254698.1|OTTHUMG00000166972.1|OTTHUMT00000392140.1|RP11-659G9.3-001|RP11-659G9.3|433|	ENSMUST00000182453.1|ENSMUSG00000098041.1|OTTMUSG00000043453.1|OTTMUST00000113966.1|Gm26981-001|Gm26981|3169|	433	3169	0.0840223	0.0260271	1	0	0	0	0	1	2	0	0	0	0	0	0	0
ENST00000412141.1|ENSG00000204054.13|OTTHUMG00000020783.9|OTTHUMT00000054582.1|LINC00963-005|LINC00963|739|	ENSMUST00000134920.1|ENSMUSG00000087435.1|OTTMUSG00000033582.1|OTTMUST00000084592.1|Gm16323-001|Gm16323|556|	739	556	0.0838972	0.0261939	0	0	1	0	0	0	1	0	0	0	0	0	0	0
ENST00000546686.1|ENSG00000257671.1|OTTHUMG00000169581.1|OTTHUMT00000404910.1|RP3-416H24.1-001|RP3-416H24.1|1693|	ENSMUST00000180639.1|ENSMUSG00000097915.1|-|-|A330009N23Rik-201|A330009N23Rik|1392|	1693	1392	0.0838347	0.0262775	0	0	1	1	0	0	2	0	0	0	0	0	0	0
ENST00000604104.1|ENSG00000271155.1|OTTHUMG00000185271.1|OTTHUMT00000470022.1|RP11-435O5.5-001|RP11-435O5.5|1402|	ENSMUST00000195845.1|ENSMUSG00000102282.1|OTTMUSG00000042853.1|OTTMUST00000112631.1|A930032L01Rik-001|A930032L01Rik|957|	1402	957	0.0838081	0.0263131	1	0	2	1	0	0	4	1	0	1	0	1	1	4
ENST00000446686.1|ENSG00000232762.1|OTTHUMG00000008935.1|OTTHUMT00000024739.1|RP4-784A16.4-001|RP4-784A16.4|752|	ENSMUST00000138289.1|ENSMUSG00000073779.7|OTTMUSG00000009007.2|OTTMUST00000020440.1|Lrp8os2-002|Lrp8os2|891|	752	891	0.0836831	0.0264814	0	0	0	0	0	0	0	0	0	1	1	0	0	2
ENST00000512206.1|ENSG00000273046.1|OTTHUMG00000186499.1|OTTHUMT00000473247.1|RP11-834C11.14-001|RP11-834C11.14|1389|	ENSMUST00000186379.1|ENSMUSG00000099758.1|OTTMUSG00000048331.1|OTTMUST00000123961.1|Gm10830-001|Gm10830|636|	1389	636	0.0836809	0.0264844	1	0	2	2	0	1	6	0	0	2	0	0	0	2
ENST00000467530.5|ENSG00000282057.1|OTTHUMG00000010578.5|OTTHUMT00000029193.2|RP4-621F18.2-002|RP4-621F18.2|2745|	ENSMUST00000199255.1|ENSMUSG00000105959.1|OTTMUSG00000055189.1|OTTMUST00000136687.1|D530037P16Rik-001|D530037P16Rik|1027|	2745	1027	0.0836318	0.0265507	0	0	0	0	0	2	2	0	0	1	0	0	0	1
ENST00000561655.1|ENSG00000261672.1|OTTHUMG00000176297.1|OTTHUMT00000431733.1|RP11-475B2.1-001|RP11-475B2.1|885|	ENSMUST00000211191.1|ENSMUSG00000109908.1|OTTMUSG00000060712.1|OTTMUST00000148429.1|RP24-459A4.6-001|RP24-459A4.6|3654|	885	3654	0.0835413	0.0266733	0	0	0	0	0	1	1	1	0	0	0	0	0	1
ENST00000449537.1|ENSG00000214870.8|OTTHUMG00000152806.2|OTTHUMT00000328005.2|AC004540.5-002|AC004540.5|727|	ENSMUST00000203453.1|ENSMUSG00000108244.1|OTTMUSG00000057622.1|OTTMUST00000141605.1|Gm44077-001|Gm44077|435|	727	435	0.08354	0.026675	1	0	0	1	0	0	2	0	0	0	0	0	0	0
ENST00000623522.1|ENSG00000234327.7|OTTHUMG00000132913.2|OTTHUMT00000438988.1|AC012146.7-004|AC012146.7|1646|	ENSMUST00000179676.1|ENSMUSG00000093858.1|OTTMUSG00000042320.2|OTTMUST00000111372.2|Gm19967-001|Gm19967|2138|	1646	2138	0.083447	0.0268016	0	0	0	0	0	1	1	1	0	0	0	1	2	4
ENST00000526611.5|ENSG00000246982.6|OTTHUMG00000166301.1|OTTHUMT00000389041.1|RP1-179N16.6-002|RP1-179N16.6|587|	ENSMUST00000146779.1|ENSMUSG00000087615.1|OTTMUSG00000031638.1|OTTMUST00000078370.1|Pnpla1os-001|Pnpla1os|3946|	587	3946	0.0834398	0.0268113	0	0	1	1	0	0	2	0	0	2	2	1	1	6
ENST00000501448.5|ENSG00000248015.6|OTTHUMG00000168079.3|OTTHUMT00000449737.1|AC005329.7-003|AC005329.7|3571|	ENSMUST00000166593.1|ENSMUSG00000090860.1|OTTMUSG00000035447.1|OTTMUST00000090684.1|Gm17134-001|Gm17134|437|	3571	437	0.0833734	0.0269021	0	1	3	4	0	0	8	0	0	1	0	0	0	1
ENST00000568928.2|ENSG00000261428.2|OTTHUMG00000176330.2|OTTHUMT00000431769.2|RP11-16P6.1-001|RP11-16P6.1|2821|	ENSMUST00000195509.1|ENSMUSG00000104018.1|OTTMUSG00000047792.1|OTTMUST00000123037.1|4833412K13Rik-001|4833412K13Rik|1479|	2821	1479	0.0832448	0.0270784	1	0	0	1	0	1	3	0	1	0	0	0	1	2
ENST00000433433.1|ENSG00000229743.2|OTTHUMG00000153064.1|OTTHUMT00000329325.1|LINC01159-001|LINC01159|3103|	ENSMUST00000177136.2|ENSMUSG00000060424.14|OTTMUSG00000039880.3|OTTMUST00000112081.1|Pantr1-004|Pantr1|1543|	3103	1543	0.0831396	0.0272234	1	0	3	2	0	1	7	0	0	2	1	0	0	3
ENST00000633140.1|ENSG00000282386.1|OTTHUMG00000191427.1|OTTHUMT00000487855.1|RP11-422P24.12-001|RP11-422P24.12|710|	ENSMUST00000200437.1|ENSMUSG00000105350.1|OTTMUSG00000052747.1|OTTMUST00000132053.1|4930537H20Rik-001|4930537H20Rik|1683|	710	1683	0.0829825	0.0274412	0	0	0	0	0	0	0	0	1	2	1	1	0	5
ENST00000567401.1|ENSG00000260973.1|OTTHUMG00000176839.1|OTTHUMT00000434000.1|RP11-105C19.2-001|RP11-105C19.2|1666|	ENSMUST00000205846.1|ENSMUSG00000108752.1|OTTMUSG00000058107.1|OTTMUST00000142676.1|Gm45191-001|Gm45191|5439|	1666	5439	0.0828939	0.0275647	1	0	1	0	1	1	4	1	0	2	0	1	5	9
ENST00000426021.5|ENSG00000177640.15|OTTHUMG00000019127.8|OTTHUMT00000050579.1|CASC2-003|CASC2|3232|	ENSMUST00000168140.1|ENSMUSG00000091378.1|OTTMUSG00000036574.1|OTTMUST00000093791.1|Gm4219-001|Gm4219|2143|	3232	2143	0.0828513	0.0276242	0	0	0	0	0	1	1	0	0	0	0	0	0	0
ENST00000507826.1|ENSG00000250326.1|OTTHUMG00000161406.1|OTTHUMT00000364807.1|RP11-284M14.1-001|RP11-284M14.1|579|	ENSMUST00000211421.1|ENSMUSG00000109587.1|OTTMUSG00000061340.1|OTTMUST00000149675.1|RP24-335D17.3-001|RP24-335D17.3|687|	579	687	0.0828467	0.0276307	0	0	1	1	1	0	3	0	0	1	1	0	0	2
ENST00000624416.1|ENSG00000280193.1|OTTHUMG00000173431.1|OTTHUMT00000423085.1|RP13-923O23.7-001|RP13-923O23.7|2327|	ENSMUST00000191685.1|ENSMUSG00000104451.1|OTTMUSG00000051031.1|OTTMUST00000129377.1|Gm37831-001|Gm37831|1787|	2327	1787	0.0827115	0.0278204	0	0	0	0	0	1	1	1	0	0	0	0	1	2
ENST00000422117.1|ENSG00000235731.1|OTTHUMG00000056663.1|OTTHUMT00000126738.1|AC124997.1-001|AC124997.1|2491|	ENSMUST00000208008.1|ENSMUSG00000109157.1|OTTMUSG00000058961.1|OTTMUST00000144654.1|Gm44829-001|Gm44829|3193|	2491	3193	0.0826401	0.0279211	0	0	0	0	0	0	0	0	0	0	0	0	0	0
ENST00000416553.1|ENSG00000231698.2|OTTHUMG00000066363.2|OTTHUMT00000141935.1|AP002856.5-001|AP002856.5|584|	ENSMUST00000194211.1|ENSMUSG00000103855.1|OTTMUSG00000047754.1|OTTMUST00000122976.1|Gm37605-001|Gm37605|550|	584	550	0.0826098	0.0279639	0	0	0	0	0	0	0	0	0	0	0	0	0	0
ENST00000429872.1|ENSG00000237181.1|OTTHUMG00000151414.1|OTTHUMT00000322540.1|AC147651.4-001|AC147651.4|731|	ENSMUST00000100518.2|ENSMUSG00000075585.3|OTTMUSG00000048600.1|-|6330403L08Rik-201|6330403L08Rik|5521|	731	5521	0.0825594	0.0280353	0	0	0	0	0	0	0	1	0	7	7	0	0	15
ENST00000594805.3|ENSG00000268650.3|OTTHUMG00000183374.6|OTTHUMT00000471985.1|AC068499.10-003|AC068499.10|855|	ENSMUST00000116172.1|ENSMUSG00000080058.2|OTTMUSG00000061456.1|-|Gm11175-201|Gm11175|543|	855	543	0.0825436	0.0280576	0	0	2	1	0	0	3	0	0	1	1	0	0	2
ENST00000579527.5|ENSG00000265148.5|OTTHUMG00000178924.1|OTTHUMT00000443987.1|TSPOAP1-AS1-001|TSPOAP1-AS1|2042|	ENSMUST00000130442.1|ENSMUSG00000085872.1|OTTMUSG00000001440.1|OTTMUST00000002816.1|Gm11505-001|Gm11505|737|	2042	737	0.0824825	0.0281444	0	0	4	2	0	1	7	0	0	1	0	0	0	1
ENST00000592389.1|ENSG00000267344.1|OTTHUMG00000180427.1|OTTHUMT00000451310.1|CTB-39G8.3-001|CTB-39G8.3|457|	ENSMUST00000130556.1|ENSMUSG00000085733.1|OTTMUSG00000003014.1|OTTMUST00000006189.1|Arhgap27os1-001|Arhgap27os1|923|	457	923	0.0823166	0.0283811	0	0	0	0	0	0	0	0	0	2	1	0	0	3
ENST00000529783.1|ENSG00000225439.2|OTTHUMG00000152835.2|OTTHUMT00000388838.1|BOLA3-AS1-002|BOLA3-AS1|631|	ENSMUST00000125657.1|ENSMUSG00000087578.1|OTTMUSG00000024262.1|OTTMUST00000059401.1|Ccdc142os-001|Ccdc142os|891|	631	891	0.082298	0.0284078	1	0	1	1	1	0	4	0	0	0	0	0	0	0
ENST00000449469.5|ENSG00000196756.11|OTTHUMG00000032442.3|OTTHUMT00000079169.1|SNHG17-009|SNHG17|2138|	ENSMUST00000149667.7|ENSMUSG00000085385.7|OTTMUSG00000015929.2|OTTMUST00000037839.2|Snhg17-003|Snhg17|3896|	2138	3896	0.0822519	0.0284739	0	0	0	0	0	0	0	0	0	2	1	0	1	4
ENST00000452716.5|ENSG00000235885.7|OTTHUMG00000152865.5|OTTHUMT00000328290.4|AC023115.2-002|AC023115.2|3250|	ENSMUST00000143311.1|ENSMUSG00000085675.1|OTTMUSG00000005206.1|OTTMUST00000011627.1|Gm12022-001|Gm12022|1340|	3250	1340	0.0822205	0.028519	0	0	0	1	0	0	1	0	0	0	0	0	0	0
ENST00000565879.1|ENSG00000261691.1|OTTHUMG00000172798.1|OTTHUMT00000420520.1|LA16c-366D1.3-001|LA16c-366D1.3|476|	ENSMUST00000148064.1|ENSMUSG00000084862.1|OTTMUSG00000033061.1|OTTMUST00000082561.1|Gm16278-001|Gm16278|2071|	476	2071	0.082202	0.0285456	0	0	0	0	0	0	0	0	0	2	2	0	0	4
ENST00000608897.1|ENSG00000272735.1|OTTHUMG00000185975.1|OTTHUMT00000471890.1|RP11-467P9.1-001|RP11-467P9.1|607|	ENSMUST00000155159.3|ENSMUSG00000085794.5|OTTMUSG00000037559.1|OTTMUST00000096826.1|Vax2os-003|Vax2os|4063|	607	4063	0.0821586	0.0286081	0	0	2	1	0	0	3	1	0	2	0	0	2	5
ENST00000451317.2|ENSG00000233183.2|OTTHUMG00000014537.3|OTTHUMT00000040212.3|RP3-468B3.2-001|RP3-468B3.2|3630|	ENSMUST00000151398.1|ENSMUSG00000073430.4|OTTMUSG00000028926.1|OTTMUST00000071689.1|Gm10505-001|Gm10505|1587|	3630	1587	0.0820559	0.0287566	0	0	3	3	0	0	6	0	0	1	1	0	0	2
ENST00000441955.2|ENSG00000229893.2|OTTHUMG00000152710.2|OTTHUMT00000327509.2|AC004549.6-001|AC004549.6|1190|	ENSMUST00000203301.1|ENSMUSG00000108170.1|OTTMUSG00000057689.1|OTTMUST00000141734.1|Gm43966-001|Gm43966|612|	1190	612	0.0819648	0.0288887	0	0	1	1	0	0	2	0	0	1	1	0	0	2
ENST00000577267.1|ENSG00000264112.1|OTTHUMG00000178780.1|OTTHUMT00000443326.1|RP11-159D12.2-002|RP11-159D12.2|4056|	ENSMUST00000152627.1|ENSMUSG00000087373.7|OTTMUSG00000027461.1|OTTMUST00000067971.1|Gm15892-002|Gm15892|439|	4056	439	0.0818971	0.0289873	3	1	0	0	0	3	7	0	0	0	0	0	0	0
ENST00000558499.2|ENSG00000259275.2|OTTHUMG00000171847.2|OTTHUMT00000415392.2|RP11-522B15.3-002|RP11-522B15.3|4856|	ENSMUST00000207723.1|ENSMUSG00000108869.1|OTTMUSG00000059659.1|OTTMUST00000146284.1|Gm44532-001|Gm44532|2598|	4856	2598	0.08189	0.0289977	1	0	0	0	0	4	5	0	0	0	0	0	1	1
ENST00000611501.1|ENSG00000274833.1|OTTHUMG00000186759.1|OTTHUMT00000473724.1|RP11-1055B8.10-001|RP11-1055B8.10|352|	ENSMUST00000140273.1|ENSMUSG00000085636.1|OTTMUSG00000004108.1|OTTMUST00000009279.1|Gm11769-001|Gm11769|1657|	352	1657	0.0818674	0.0290306	1	0	1	1	0	0	3	1	0	2	1	0	0	4
ENST00000554403.1|ENSG00000157306.14|OTTHUMG00000187908.1|OTTHUMT00000413830.1|RP11-66N24.4-004|RP11-66N24.4|2524|	ENSMUST00000183750.1|ENSMUSG00000093452.3|OTTMUSG00000049453.1|OTTMUST00000126072.1|Zfhx2os-001|Zfhx2os|2487|	2524	2487	0.0818515	0.0290539	0	2	0	0	0	0	2	0	2	1	0	0	0	3
ENST00000440013.1|ENSG00000235058.1|OTTHUMG00000156875.1|OTTHUMT00000346386.1|ZMYND10-AS1-001|ZMYND10-AS1|250|	ENSMUST00000163196.1|ENSMUSG00000090570.1|OTTMUSG00000036838.1|OTTMUST00000094588.1|Gm17041-001|Gm17041|479|	250	479	0.0818462	0.0290616	0	0	1	0	0	0	1	0	0	0	0	0	0	0
ENST00000620908.1|ENSG00000275812.1|OTTHUMG00000187022.1|OTTHUMT00000474262.1|RP4-697K14.15-001|RP4-697K14.15|328|	ENSMUST00000122831.1|ENSMUSG00000010492.10|OTTMUSG00000030649.1|OTTMUST00000075883.1|Uckl1os-003|Uckl1os|2018|	328	2018	0.0818433	0.0290659	0	0	0	0	0	0	0	0	0	2	0	0	0	2
ENST00000546821.5|ENSG00000257771.5|OTTHUMG00000169708.2|OTTHUMT00000405534.1|RP11-70F11.8-001|RP11-70F11.8|3157|	ENSMUST00000159738.1|ENSMUSG00000089968.1|OTTMUSG00000034990.1|OTTMUST00000088980.1|Nckap5los-001|Nckap5los|1712|	3157	1712	0.0816885	0.0292929	0	1	0	0	0	0	1	0	0	0	3	0	0	3
ENST00000568795.1|ENSG00000261240.1|OTTHUMG00000177008.1|OTTHUMT00000434786.1|RP11-304L19.4-001|RP11-304L19.4|456|	ENSMUST00000181014.7|ENSMUSG00000073437.10|OTTMUSG00000042676.1|OTTMUST00000112384.1|D330041H03Rik-002|D330041H03Rik|1903|	456	1903	0.0816708	0.0293189	0	0	1	1	0	0	2	0	0	0	0	0	0	0
ENST00000564055.1|ENSG00000259780.3|OTTHUMG00000177085.1|OTTHUMT00000435235.1|RP11-304L19.12-001|RP11-304L19.12|1225|	ENSMUST00000171563.3|ENSMUSG00000085185.9|OTTMUSG00000032976.1|-|BC028777-201|BC028777|815|	1225	815	0.0816235	0.0293887	0	0	2	3	0	0	5	0	0	0	0	0	0	0
ENST00000571724.3|ENSG00000262877.4|OTTHUMG00000177951.4|OTTHUMT00000439901.3|RP11-1055B8.4-001|RP11-1055B8.4|1565|	ENSMUST00000139014.1|ENSMUSG00000043993.6|OTTMUSG00000004130.2|OTTMUST00000009324.2|2900052L18Rik-001|2900052L18Rik|1588|	1565	1588	0.0815236	0.0295364	0	1	2	3	0	0	6	0	0	1	1	0	0	2
ENST00000618070.1|ENSG00000278075.1|OTTHUMG00000186688.1|OTTHUMT00000473610.1|RP11-248M19.1-001|RP11-248M19.1|349|	ENSMUST00000191632.1|ENSMUSG00000102260.1|OTTMUSG00000044920.1|OTTMUST00000118071.1|D330025C20Rik-001|D330025C20Rik|3046|	349	3046	0.0814278	0.0296786	0	0	0	1	0	0	1	1	0	1	1	0	1	4
ENST00000614771.1|ENSG00000278709.1|OTTHUMG00000186958.1|OTTHUMT00000474101.1|NKILA-001|NKILA|2598|	ENSMUST00000143738.1|ENSMUSG00000086537.7|OTTMUSG00000016620.1|OTTMUST00000040200.1|Nespas-003|Nespas|1083|	2598	1083	0.0813768	0.0297546	0	0	1	0	0	0	1	1	1	1	0	0	0	3
ENST00000418803.1|ENSG00000230149.2|OTTHUMG00000151089.1|OTTHUMT00000321250.1|RP3-508I15.19-001|RP3-508I15.19|527|	ENSMUST00000128342.1|ENSMUSG00000087543.1|OTTMUSG00000034300.1|OTTMUST00000087224.1|Gm16576-001|Gm16576|5404|	527	5404	0.0812688	0.0299161	1	0	1	1	0	0	3	0	0	2	2	0	0	4
ENST00000411815.3|ENSG00000232557.3|OTTHUMG00000013895.3|OTTHUMT00000038965.3|RP11-4M23.3-001|RP11-4M23.3|210|	ENSMUST00000183220.1|ENSMUSG00000097995.1|OTTMUSG00000043113.1|OTTMUST00000113151.1|Gm24362-001|Gm24362|416|	210	416	0.0812617	0.0299267	0	0	0	0	0	0	0	0	0	0	0	0	0	0
ENST00000569497.1|ENSG00000260190.1|OTTHUMG00000175609.1|OTTHUMT00000430637.1|RP11-229P13.25-001|RP11-229P13.25|820|	ENSMUST00000181730.1|ENSMUSG00000097872.1|-|-|Gm26702-201|Gm26702|4570|	820	4570	0.0811834	0.0300443	0	0	1	1	0	0	2	1	1	5	5	0	0	12
ENST00000417346.1|ENSG00000218018.2|OTTHUMG00000134335.1|OTTHUMT00000259506.1|RP4-800J21.3-001|RP4-800J21.3|1540|	ENSMUST00000139677.1|ENSMUSG00000087442.1|OTTMUSG00000016678.1|OTTMUST00000040387.1|Gm14453-001|Gm14453|553|	1540	553	0.0811658	0.0300707	0	0	1	1	0	0	2	0	0	0	0	0	0	0
ENST00000609553.1|ENSG00000273486.1|OTTHUMG00000185980.1|OTTHUMT00000471906.1|RP11-731C17.2-001|RP11-731C17.2|1684|	ENSMUST00000195122.1|ENSMUSG00000104272.1|OTTMUSG00000048767.1|OTTMUST00000124787.1|Gm38297-001|Gm38297|1057|	1684	1057	0.0810585	0.0302325	0	0	0	0	0	1	1	3	0	1	0	0	3	7
ENST00000622962.1|ENSG00000280247.1|OTTHUMG00000181878.1|OTTHUMT00000458081.1|AC005578.3-001|AC005578.3|1020|	ENSMUST00000181962.1|ENSMUSG00000097077.1|-|-|Gm16712-201|Gm16712|1960|	1020	1960	0.0810238	0.0302851	1	0	1	1	0	0	3	0	0	0	0	0	2	2
ENST00000625151.1|ENSG00000279770.1|OTTHUMG00000186842.1|OTTHUMT00000473881.1|LINC00552-001|LINC00552|2579|	ENSMUST00000080795.8|ENSMUSG00000047935.17|OTTMUSG00000046190.2|-|Gm5607-201|Gm5607|5064|	2579	5064	0.0809462	0.0304028	0	0	1	2	1	0	4	0	0	2	1	0	0	3
ENST00000600242.1|ENSG00000269583.1|OTTHUMG00000182733.1|OTTHUMT00000463344.1|L34079.4-001|L34079.4|546|	ENSMUST00000180699.1|ENSMUSG00000097215.1|OTTMUSG00000058225.1|OTTMUST00000143009.1|Gm26550-001|Gm26550|1184|	546	1184	0.080918	0.0304456	0	0	0	1	0	0	1	0	0	1	1	0	0	2
ENST00000439621.1|ENSG00000235563.1|OTTHUMG00000008925.1|OTTHUMT00000024709.1|RP11-334A14.8-001|RP11-334A14.8|1871|	ENSMUST00000188737.6|ENSMUSG00000073779.7|OTTMUSG00000009007.2|OTTMUST00000121856.1|Lrp8os2-003|Lrp8os2|3078|	1871	3078	0.0808503	0.0305488	0	0	1	2	0	0	3	0	0	1	2	0	0	3
ENST00000433546.2|ENSG00000228714.2|OTTHUMG00000020550.2|OTTHUMT00000053794.2|RP11-284G10.1-001|RP11-284G10.1|396|	ENSMUST00000141162.1|ENSMUSG00000085032.1|OTTMUSG00000000259.2|OTTMUST00000000725.2|Gm11217-001|Gm11217|1729|	396	1729	0.0808318	0.030577	0	0	0	0	0	0	0	0	0	0	0	0	0	0
ENST00000439694.5|ENSG00000234352.9|OTTHUMG00000155657.6|OTTHUMT00000341008.1|AC009264.1-001|AC009264.1|2160|	ENSMUST00000161820.7|ENSMUSG00000073154.10|OTTMUSG00000034249.1|OTTMUST00000086993.1|9330158H04Rik-002|9330158H04Rik|2324|	2160	2324	0.0808175	0.0305988	0	0	0	0	0	1	1	0	0	0	0	0	2	2
ENST00000611566.1|ENSG00000274591.1|OTTHUMG00000187358.1|OTTHUMT00000474811.1|RP11-474P2.5-001|RP11-474P2.5|368|	ENSMUST00000185067.1|ENSMUSG00000097536.2|OTTMUSG00000044625.3|OTTMUST00000117411.3|2610037D02Rik-001|2610037D02Rik|2997|	368	2997	0.0807302	0.0307325	0	0	0	0	0	0	0	0	0	0	0	0	1	1
ENST00000446022.1|ENSG00000224729.5|OTTHUMG00000156674.2|OTTHUMT00000345284.1|PCOLCE-AS1-002|PCOLCE-AS1|456|	ENSMUST00000197965.1|ENSMUSG00000105851.1|OTTMUSG00000054537.1|OTTMUST00000135199.1|9130604C24Rik-001|9130604C24Rik|956|	456	956	0.080678	0.0308126	0	0	0	1	0	0	1	0	0	0	1	0	0	1
ENST00000456026.1|ENSG00000232100.1|OTTHUMG00000039496.1|OTTHUMT00000095286.1|RP11-152L7.2-001|RP11-152L7.2|1728|	ENSMUST00000201137.1|ENSMUSG00000106839.1|OTTMUSG00000055880.1|OTTMUST00000138252.1|Gm43497-001|Gm43497|2316|	1728	2316	0.0806369	0.0308758	0	0	0	0	0	0	0	0	0	0	0	0	1	1
ENST00000534856.1|ENSG00000255931.1|OTTHUMG00000168177.1|OTTHUMT00000398622.1|RP11-286N22.10-001|RP11-286N22.10|554|	ENSMUST00000181743.1|ENSMUSG00000097862.1|-|-|Gm26859-201|Gm26859|1852|	554	1852	0.0805825	0.0309596	1	0	1	1	0	0	3	1	0	2	2	1	0	6
ENST00000606971.5|ENSG00000272288.5|OTTHUMG00000185742.1|OTTHUMT00000471122.1|RP11-140K17.3-001|RP11-140K17.3|718|	ENSMUST00000133274.1|ENSMUSG00000087387.1|OTTMUSG00000021339.1|OTTMUST00000050600.1|Gm15420-001|Gm15420|382|	718	382	0.080565	0.0309866	1	0	0	0	0	0	1	0	0	1	1	0	0	2
ENST00000585369.1|ENSG00000267263.1|OTTHUMG00000177716.1|OTTHUMT00000438622.1|RP11-75C10.7-001|RP11-75C10.7|768|	ENSMUST00000182811.1|ENSMUSG00000086859.3|OTTMUSG00000003780.5|OTTMUST00000116901.1|Snhg20-006|Snhg20|2153|	768	2153	0.0803762	0.0312793	0	0	0	0	0	0	0	1	1	2	0	0	0	4
ENST00000588160.1|ENSG00000267278.5|OTTHUMG00000180362.1|OTTHUMT00000450940.1|MAP3K14-AS1-007|MAP3K14-AS1|573|	ENSMUST00000130556.1|ENSMUSG00000085733.1|OTTMUSG00000003014.1|OTTMUST00000006189.1|Arhgap27os1-001|Arhgap27os1|923|	573	923	0.0802906	0.0314128	0	0	1	0	0	0	1	0	0	2	1	0	0	3
ENST00000559918.1|ENSG00000259241.1|OTTHUMG00000172526.1|OTTHUMT00000418938.1|RP11-313P18.2-001|RP11-313P18.2|855|	ENSMUST00000194973.1|ENSMUSG00000102176.1|OTTMUSG00000047757.1|OTTMUST00000122979.1|Gm37871-001|Gm37871|688|	855	688	0.0802802	0.031429	0	0	0	0	0	0	0	0	0	0	0	0	0	0
ENST00000633182.1|ENSG00000282221.1|OTTHUMG00000191432.1|OTTHUMT00000487874.1|RP11-27G14.4-001|RP11-27G14.4|556|	ENSMUST00000112103.1|ENSMUSG00000090399.1|OTTMUSG00000049827.1|OTTMUST00000126894.1|Gm38399-001|Gm38399|1645|	556	1645	0.0802754	0.0314365	0	0	0	0	0	0	0	0	1	2	2	0	1	6
ENST00000607679.1|ENSG00000271992.1|OTTHUMG00000185818.1|OTTHUMT00000471372.1|RP11-42O15.3-001|RP11-42O15.3|466|	ENSMUST00000198192.1|ENSMUSG00000105201.1|OTTMUSG00000052736.1|OTTMUST00000132030.1|Gm43362-001|Gm43362|2470|	466	2470	0.0801999	0.0315548	0	0	0	0	0	0	0	1	0	0	0	0	0	1
ENST00000547006.1|ENSG00000258285.1|OTTHUMG00000169494.1|OTTHUMT00000404406.1|TESC-AS1-001|TESC-AS1|1053|	ENSMUST00000182216.1|ENSMUSG00000098072.1|OTTMUSG00000044395.1|OTTMUST00000116860.1|Gm26995-001|Gm26995|1306|	1053	1306	0.0801264	0.0316702	0	0	0	1	0	0	1	0	0	2	0	0	0	2
ENST00000616099.1|ENSG00000274128.1|OTTHUMG00000186985.1|OTTHUMT00000474172.1|RP11-342A23.2-001|RP11-342A23.2|408|	ENSMUST00000207577.1|ENSMUSG00000109390.1|OTTMUSG00000059069.1|OTTMUST00000144904.1|RP24-120F8.1-001|RP24-120F8.1|3794|	408	3794	0.080044	0.0318001	1	0	0	0	0	1	2	0	0	0	0	0	2	2
ENST00000608161.1|ENSG00000272783.1|OTTHUMG00000186229.1|OTTHUMT00000472449.1|RP13-1016M1.2-001|RP13-1016M1.2|289|	ENSMUST00000202708.1|ENSMUSG00000106834.1|OTTMUSG00000055659.1|OTTMUST00000137751.1|Gm10459-001|Gm10459|1155|	289	1155	0.0800292	0.0318234	0	0	1	1	0	0	2	0	0	2	2	0	0	4
ENST00000607166.1|ENSG00000237036.4|OTTHUMG00000017905.3|OTTHUMT00000470837.1|ZEB1-AS1-009|ZEB1-AS1|2503|	ENSMUST00000181714.1|ENSMUSG00000097926.1|OTTMUSG00000042542.1|OTTMUST00000112157.1|Gm26575-001|Gm26575|2232|	2503	2232	0.0800286	0.0318243	1	0	2	1	0	3	7	2	0	1	0	0	1	4
ENST00000581067.1|ENSG00000264575.1|OTTHUMG00000178804.1|OTTHUMT00000443370.1|LINC00526-001|LINC00526|1875|	ENSMUST00000097289.2|ENSMUSG00000073374.3|OTTMUSG00000046181.1|-|C030034I22Rik-201|C030034I22Rik|1471|	1875	1471	0.0799506	0.0319478	0	0	2	2	0	0	4	1	0	0	0	0	2	3
ENST00000592572.1|ENSG00000267665.1|OTTHUMG00000177427.3|OTTHUMT00000436891.2|RP11-13K12.2-001|RP11-13K12.2|4440|	ENSMUST00000145438.1|ENSMUSG00000086859.3|OTTMUSG00000003780.5|OTTMUST00000086892.1|Snhg20-002|Snhg20|459|	4440	459	0.0799402	0.0319643	1	0	3	0	1	0	5	0	0	0	0	0	0	0
ENST00000525114.1|ENSG00000254654.1|OTTHUMG00000166477.1|OTTHUMT00000389926.1|AC068858.1-001|AC068858.1|1239|	ENSMUST00000150159.1|ENSMUSG00000087559.1|OTTMUSG00000014530.1|OTTMUST00000034471.1|Gm13802-001|Gm13802|663|	1239	663	0.0799339	0.0319743	0	0	0	0	1	0	1	0	0	1	1	0	0	2
ENST00000574041.5|ENSG00000262223.6|OTTHUMG00000177950.1|OTTHUMT00000439899.1|RP11-1055B8.3-004|RP11-1055B8.3|566|	ENSMUST00000145437.1|ENSMUSG00000075389.3|OTTMUSG00000004109.1|OTTMUST00000009281.1|2810410L24Rik-002|2810410L24Rik|646|	566	646	0.0799309	0.0319791	0	0	0	0	0	0	0	0	0	1	2	0	0	3
ENST00000515692.1|ENSG00000248954.1|OTTHUMG00000161832.1|OTTHUMT00000366203.1|RP11-304F15.4-001|RP11-304F15.4|1816|	ENSMUST00000189860.1|ENSMUSG00000101258.1|OTTMUSG00000046866.1|OTTMUST00000121534.1|Gm29477-001|Gm29477|499|	1816	499	0.0799051	0.0320199	0	0	0	1	1	0	2	0	0	1	0	0	0	1
ENST00000440763.6|ENSG00000253500.5|OTTHUMG00000163764.2|OTTHUMT00000375297.2|AF121898.3-003|AF121898.3|1860|	ENSMUST00000133363.1|ENSMUSG00000087402.1|OTTMUSG00000004685.1|OTTMUST00000010564.1|Gm11867-001|Gm11867|1909|	1860	1909	0.0798991	0.0320296	0	0	0	0	0	0	0	0	0	0	0	0	1	1
ENST00000624592.1|ENSG00000279488.1|OTTHUMG00000180113.1|OTTHUMT00000449822.1|AC004623.3-001|AC004623.3|2127|	ENSMUST00000168521.1|ENSMUSG00000091994.1|OTTMUSG00000035443.1|OTTMUST00000090654.1|E130317F20Rik-001|E130317F20Rik|3265|	2127	3265	0.0798273	0.0321437	1	0	0	0	0	0	1	0	0	0	1	0	0	1
ENST00000506460.1|ENSG00000248408.1|OTTHUMG00000161747.1|OTTHUMT00000365982.1|RP11-452C8.1-001|RP11-452C8.1|741|	ENSMUST00000195915.1|ENSMUSG00000106518.1|OTTMUSG00000053326.1|OTTMUST00000133179.1|Gm42759-001|Gm42759|2439|	741	2439	0.0798143	0.0321645	0	0	2	1	1	0	4	1	0	1	0	1	2	5
ENST00000425358.2|ENSG00000233429.9|OTTHUMG00000158089.4|OTTHUMT00000137960.1|HOTAIRM1-004|HOTAIRM1|637|	ENSMUST00000147174.2|ENSMUSG00000086427.8|OTTMUSG00000018876.2|OTTMUST00000045402.2|Hoxa11os-003|Hoxa11os|1116|	637	1116	0.0798131	0.0321663	0	0	1	1	0	0	2	1	0	2	0	0	0	3
ENST00000423323.2|ENSG00000236088.9|OTTHUMG00000058771.6|OTTHUMT00000129955.2|COX10-AS1-001|COX10-AS1|3000|	ENSMUST00000145095.1|ENSMUSG00000087622.1|OTTMUSG00000005894.1|OTTMUST00000013117.1|Gm12290-001|Gm12290|2112|	3000	2112	0.0797772	0.0322236	2	0	0	0	0	3	5	0	0	0	0	0	0	0
ENST00000448131.1|ENSG00000230190.1|OTTHUMG00000152747.1|OTTHUMT00000327674.1|AC005518.2-001|AC005518.2|1116|	ENSMUST00000205029.1|ENSMUSG00000107571.1|OTTMUSG00000057580.1|OTTMUST00000141536.1|Gm43877-001|Gm43877|2238|	1116	2238	0.0797317	0.0322963	1	0	0	0	0	0	1	0	0	0	0	0	0	0
ENST00000621571.1|ENSG00000275186.1|OTTHUMG00000186684.1|OTTHUMT00000473605.1|RP11-196B3.3-001|RP11-196B3.3|568|	ENSMUST00000191632.1|ENSMUSG00000102260.1|OTTMUSG00000044920.1|OTTMUST00000118071.1|D330025C20Rik-001|D330025C20Rik|3046|	568	3046	0.0796191	0.032477	1	0	2	1	0	0	4	1	0	1	1	0	1	4
ENST00000603514.1|ENSG00000271334.5|OTTHUMG00000185121.1|OTTHUMT00000469635.1|CTD-2078B5.2-002|CTD-2078B5.2|550|	ENSMUST00000161939.1|ENSMUSG00000089771.1|OTTMUSG00000033431.1|OTTMUST00000083958.1|Gm16311-001|Gm16311|702|	550	702	0.0794888	0.0326869	1	0	0	0	0	0	1	0	0	0	0	0	0	0
ENST00000553639.1|ENSG00000258730.1|OTTHUMG00000171263.1|OTTHUMT00000412683.1|ITPK1-AS1-001|ITPK1-AS1|4701|	ENSMUST00000178938.1|ENSMUSG00000095174.1|OTTMUSG00000042334.1|OTTMUST00000111530.1|Gm20069-001|Gm20069|545|	4701	545	0.0794871	0.0326896	0	0	2	2	1	0	5	0	0	0	1	0	0	1
ENST00000466037.6|ENSG00000233101.10|OTTHUMG00000159919.3|OTTHUMT00000358246.2|HOXB-AS3-004|HOXB-AS3|522|	ENSMUST00000153012.1|ENSMUSG00000075586.4|OTTMUSG00000001775.1|OTTMUST00000003559.1|Gm11529-001|Gm11529|639|	522	639	0.079461	0.0327318	0	0	1	0	0	0	1	0	0	0	0	0	0	0
ENST00000439319.5|ENSG00000226083.5|OTTHUMG00000017758.1|OTTHUMT00000047058.1|SLC39A12-AS1-001|SLC39A12-AS1|1966|	ENSMUST00000194987.1|ENSMUSG00000103050.1|OTTMUSG00000051083.1|OTTMUST00000129477.1|Gm38273-001|Gm38273|2382|	1966	2382	0.079445	0.0327579	0	0	0	0	0	0	0	1	0	0	0	0	0	1
ENST00000556697.1|ENSG00000196273.7|OTTHUMG00000171592.1|OTTHUMT00000414340.1|LINC00523-001|LINC00523|2071|	ENSMUST00000143272.7|ENSMUSG00000021268.17|OTTMUSG00000023027.1|OTTMUST00000055472.1|Meg3-004|Meg3|5971|	2071	5971	0.0794077	0.0328182	0	0	0	0	0	0	0	1	2	3	2	1	1	10
ENST00000434645.1|ENSG00000234431.2|OTTHUMG00000154717.1|OTTHUMT00000336738.1|AC007283.5-001|AC007283.5|445|	ENSMUST00000194726.1|ENSMUSG00000102719.1|OTTMUSG00000047217.1|OTTMUST00000122095.1|Gm37760-001|Gm37760|3841|	445	3841	0.079374	0.0328729	0	0	0	0	0	0	0	3	0	0	0	0	3	6
ENST00000598887.1|ENSG00000268475.1|OTTHUMG00000182748.1|OTTHUMT00000463447.1|CTC-435M10.6-001|CTC-435M10.6|344|	ENSMUST00000205635.1|ENSMUSG00000108579.1|OTTMUSG00000058390.1|OTTMUST00000143415.1|Gm45154-001|Gm45154|138|	344	138	0.0793613	0.0328935	0	0	0	1	0	0	1	0	0	1	0	0	0	1
ENST00000578888.1|ENSG00000266369.1|OTTHUMG00000178997.1|OTTHUMT00000444300.1|RP11-344E13.4-001|RP11-344E13.4|1372|	ENSMUST00000101077.2|ENSMUSG00000072847.4|OTTMUSG00000005844.2|-|A530017D24Rik-201|A530017D24Rik|2315|	1372	2315	0.0793505	0.0329111	0	0	0	0	0	0	0	0	0	1	1	1	2	5
ENST00000438408.1|ENSG00000235126.1|OTTHUMG00000155481.1|OTTHUMT00000340291.1|AC128709.3-001|AC128709.3|558|	ENSMUST00000141256.1|ENSMUSG00000075265.4|OTTMUSG00000025425.2|OTTMUST00000062603.1|Tnk2os-001|Tnk2os|1392|	558	1392	0.079325	0.0329526	0	0	0	0	0	1	1	0	0	1	1	0	0	2
ENST00000623562.1|ENSG00000279136.1|OTTHUMG00000172814.1|OTTHUMT00000420619.1|LA16c-335H7.2-001|LA16c-335H7.2|325|	ENSMUST00000180868.1|ENSMUSG00000097518.1|-|-|Gm26694-201|Gm26694|1902|	325	1902	0.0793099	0.0329772	0	0	1	1	0	0	2	0	0	0	1	0	0	1
ENST00000409819.1|ENSG00000222035.3|OTTHUMG00000154578.2|OTTHUMT00000336159.2|AC079354.3-001|AC079354.3|3093|	ENSMUST00000192922.1|ENSMUSG00000103821.1|OTTMUSG00000047255.1|OTTMUST00000122174.1|D430013B06Rik-001|D430013B06Rik|1872|	3093	1872	0.0791355	0.0332622	0	0	0	0	0	0	0	0	0	0	0	0	0	0
ENST00000435858.1|ENSG00000226089.2|OTTHUMG00000015096.2|OTTHUMT00000041327.2|RP1-300G12.2-001|RP1-300G12.2|784|	ENSMUST00000192504.1|ENSMUSG00000103368.1|OTTMUSG00000045031.1|OTTMUST00000118331.1|Gm36927-001|Gm36927|1841|	784	1841	0.0790546	0.0333952	0	0	0	0	0	0	0	0	0	0	0	0	0	0
ENST00000445180.2|ENSG00000233399.2|OTTHUMG00000003683.2|OTTHUMT00000010417.2|RP11-111I12.1-001|RP11-111I12.1|1519|	ENSMUST00000149942.1|ENSMUSG00000078531.3|OTTMUSG00000009467.2|OTTMUST00000021565.2|Gm831-001|Gm831|4517|	1519	4517	0.0789106	0.0336328	0	0	0	0	0	0	0	0	0	2	2	1	0	5
ENST00000586251.5|ENSG00000267395.5|OTTHUMG00000182333.2|OTTHUMT00000460569.1|AC074212.6-003|AC074212.6|483|	ENSMUST00000098778.2|ENSMUSG00000074355.2|OTTMUSG00000058458.1|OTTMUST00000143577.1|Gm10676-001|Gm10676|3221|	483	3221	0.0788701	0.0337	0	0	1	0	0	0	1	2	0	2	4	0	0	8
ENST00000624096.1|ENSG00000280003.1|OTTHUMG00000175714.1|OTTHUMT00000430893.1|RP11-330H6.6-001|RP11-330H6.6|1997|	ENSMUST00000150953.1|ENSMUSG00000086296.2|OTTMUSG00000034700.1|OTTMUST00000088121.1|D030055H07Rik-002|D030055H07Rik|4325|	1997	4325	0.0788639	0.0337103	0	0	1	0	0	0	1	0	0	0	2	0	0	2
ENST00000417844.1|ENSG00000231538.1|OTTHUMG00000153281.1|OTTHUMT00000330540.1|DPP10-AS3-001|DPP10-AS3|665|	ENSMUST00000195556.1|ENSMUSG00000102940.1|OTTMUSG00000049234.1|OTTMUST00000125586.1|Gm37551-001|Gm37551|2861|	665	2861	0.0788483	0.0337362	0	0	0	0	0	1	1	0	0	1	0	0	2	3
ENST00000587616.1|ENSG00000230773.6|OTTHUMG00000151756.5|OTTHUMT00000459476.1|AC079807.4-002|AC079807.4|1353|	ENSMUST00000180785.1|ENSMUSG00000097676.1|-|-|Gm26612-201|Gm26612|1055|	1353	1055	0.0788152	0.0337911	0	0	0	0	0	0	0	0	0	0	0	0	0	0
ENST00000425277.1|ENSG00000228133.2|OTTHUMG00000132193.2|OTTHUMT00000255246.2|AC099684.1-001|AC099684.1|1747|	ENSMUST00000209836.1|ENSMUSG00000109715.1|OTTMUSG00000060879.1|OTTMUST00000148786.1|RP23-384C18.12-001|RP23-384C18.12|2795|	1747	2795	0.0787702	0.0338661	0	0	1	0	0	1	2	1	0	3	4	0	0	8
ENST00000414161.1|ENSG00000236354.1|OTTHUMG00000016756.1|OTTHUMT00000044596.1|LINC00437-001|LINC00437|791|	ENSMUST00000197107.1|ENSMUSG00000105444.1|OTTMUSG00000053501.1|OTTMUST00000133434.1|Gm10727-001|Gm10727|1602|	791	1602	0.0787657	0.0338735	0	0	0	0	0	0	0	0	0	0	0	0	1	1
ENST00000540136.1|ENSG00000256694.1|OTTHUMG00000167978.1|OTTHUMT00000397389.1|RP11-598F7.5-001|RP11-598F7.5|1101|	ENSMUST00000203013.1|ENSMUSG00000108171.1|OTTMUSG00000056860.1|OTTMUST00000140257.1|Gm43915-001|Gm43915|5037|	1101	5037	0.078477	0.0343575	0	0	1	1	0	0	2	0	0	2	1	0	1	4
ENST00000498872.2|ENSG00000245869.2|OTTHUMG00000166413.1|OTTHUMT00000389652.1|RP11-158I9.5-001|RP11-158I9.5|1646|	ENSMUST00000080911.1|ENSMUSG00000060380.2|OTTMUSG00000033672.1|-|C030014I23Rik-201|C030014I23Rik|1810|	1646	1810	0.0784751	0.0343608	0	0	1	1	1	0	3	0	0	1	1	0	0	2
ENST00000417426.1|ENSG00000233145.1|OTTHUMG00000022540.1|OTTHUMT00000058573.1|RP11-364B14.1-001|RP11-364B14.1|582|	ENSMUST00000152669.1|ENSMUSG00000067835.4|OTTMUSG00000017608.1|OTTMUST00000042791.1|Gm14661-001|Gm14661|2051|	582	2051	0.0784629	0.0343812	0	0	1	0	0	0	1	0	0	0	0	0	0	0
ENST00000434887.1|ENSG00000236795.1|OTTHUMG00000152744.1|OTTHUMT00000327671.1|AC006004.1-001|AC006004.1|2145|	ENSMUST00000204853.1|ENSMUSG00000107779.1|OTTMUSG00000057569.1|OTTMUST00000141525.1|Gm43874-001|Gm43874|2798|	2145	2798	0.0784357	0.0344271	0	0	0	0	0	0	0	1	0	0	0	0	2	3
ENST00000569373.1|ENSG00000260542.1|OTTHUMG00000175628.1|OTTHUMT00000430675.1|RP13-379O24.2-001|RP13-379O24.2|2188|	ENSMUST00000145549.1|ENSMUSG00000084843.1|OTTMUSG00000016334.1|OTTMUST00000039249.1|B230312C02Rik-001|B230312C02Rik|1703|	2188	1703	0.0783461	0.0345788	1	0	4	2	0	0	7	0	0	1	1	0	0	2
ENST00000621378.1|ENSG00000276075.1|OTTHUMG00000186961.1|OTTHUMT00000474112.1|CTD-2012K14.8-001|CTD-2012K14.8|795|	ENSMUST00000182046.1|ENSMUSG00000098120.1|OTTMUSG00000043506.1|OTTMUST00000114099.1|Gm5914-002|Gm5914|332|	795	332	0.078226	0.034783	0	0	0	0	0	0	0	0	0	0	0	0	0	0
ENST00000616469.4|ENSG00000225783.6|OTTHUMG00000150985.4|OTTHUMT00000320797.3|MIAT-002|MIAT|10069|	ENSMUST00000176660.1|ENSMUSG00000093637.1|OTTMUSG00000042273.1|OTTMUST00000111204.1|Gm20636-001|Gm20636|707|	10069	707	0.0781783	0.0348644	0	2	1	1	0	3	7	0	0	0	1	0	0	1
ENST00000413220.1|ENSG00000231748.1|OTTHUMG00000018373.1|OTTHUMT00000048394.1|RP11-227H15.5-001|RP11-227H15.5|434|	ENSMUST00000199616.1|ENSMUSG00000105203.1|OTTMUSG00000033690.2|OTTMUST00000084867.2|4933428P19Rik-001|4933428P19Rik|1376|	434	1376	0.0781724	0.0348745	0	0	0	0	0	0	0	1	0	1	0	0	0	2
ENST00000622466.1|ENSG00000276063.1|OTTHUMG00000186903.1|OTTHUMT00000473985.1|RP11-817G13.3-001|RP11-817G13.3|494|	ENSMUST00000181323.1|ENSMUSG00000097417.1|-|-|Gm26669-201|Gm26669|1808|	494	1808	0.0780466	0.0350898	0	0	0	0	0	0	0	0	0	1	0	0	0	1
ENST00000450652.1|ENSG00000226872.1|OTTHUMG00000150899.2|OTTHUMT00000320476.2|AC002472.11-001|AC002472.11|563|	ENSMUST00000181077.1|ENSMUSG00000097764.1|-|-|Gm26635-201|Gm26635|3199|	563	3199	0.0779334	0.0352846	0	0	0	0	0	0	0	0	0	3	1	1	0	5
ENST00000603766.1|ENSG00000270750.1|OTTHUMG00000185245.1|OTTHUMT00000469955.1|RP11-461L13.3-001|RP11-461L13.3|501|	ENSMUST00000193246.1|ENSMUSG00000102919.1|OTTMUSG00000051608.1|OTTMUST00000130264.1|Gm37726-001|Gm37726|3886|	501	3886	0.0777551	0.0355933	0	0	0	0	0	0	0	1	0	0	0	0	3	4
ENST00000505663.1|ENSG00000249647.2|OTTHUMG00000163309.2|OTTHUMT00000372532.1|C5orf66-AS2-001|C5orf66-AS2|2162|	ENSMUST00000185995.1|ENSMUSG00000100096.1|OTTMUSG00000045334.1|OTTMUST00000119048.1|Gm28760-002|Gm28760|736|	2162	736	0.077741	0.0356177	0	0	2	1	0	0	3	0	0	0	1	0	0	1
ENST00000414784.1|ENSG00000243389.1|OTTHUMG00000153302.1|OTTHUMT00000330622.1|AC012442.5-001|AC012442.5|425|	ENSMUST00000165505.2|ENSMUSG00000056738.11|OTTMUSG00000015409.1|-|A730036I17Rik-201|A730036I17Rik|2181|	425	2181	0.0777286	0.0356393	0	0	0	1	0	0	1	0	0	0	0	0	0	0
ENST00000472120.1|ENSG00000239205.1|OTTHUMG00000158073.1|OTTHUMT00000350128.1|RP11-747D18.1-001|RP11-747D18.1|1948|	ENSMUST00000194514.1|ENSMUSG00000102362.1|OTTMUSG00000051726.1|OTTMUST00000130414.1|4930509J09Rik-001|4930509J09Rik|1526|	1948	1526	0.0777143	0.0356643	1	0	0	0	0	1	2	0	0	0	0	0	0	0
ENST00000564271.2|ENSG00000261596.2|OTTHUMG00000175456.2|OTTHUMT00000430018.2|CTB-31N19.3-001|CTB-31N19.3|828|	ENSMUST00000208157.1|ENSMUSG00000108954.1|OTTMUSG00000059380.1|OTTMUST00000145768.1|Gm44901-001|Gm44901|3977|	828	3977	0.0776872	0.0357115	0	0	0	0	0	0	0	1	0	1	0	0	2	4
ENST00000580897.1|ENSG00000264769.1|OTTHUMG00000178434.1|OTTHUMT00000441950.1|RP11-498C9.12-001|RP11-498C9.12|563|	ENSMUST00000193520.1|ENSMUSG00000102881.1|OTTMUSG00000042857.2|OTTMUST00000112638.2|Gm3807-001|Gm3807|1168|	563	1168	0.0775631	0.0359282	0	0	1	2	0	0	3	0	0	0	1	0	0	1
ENST00000599209.1|ENSG00000268287.1|OTTHUMG00000183342.1|OTTHUMT00000466262.1|CTB-60B18.18-001|CTB-60B18.18|598|	ENSMUST00000210866.1|ENSMUSG00000109644.1|OTTMUSG00000030340.4|OTTMUST00000075145.1|AC151602.15-002|AC151602.15|2434|	598	2434	0.0775616	0.035931	0	0	0	1	0	0	1	0	0	2	2	0	0	4
ENST00000427949.1|ENSG00000235862.2|OTTHUMG00000041085.1|OTTHUMT00000098530.1|RP11-338C15.5-001|RP11-338C15.5|2225|	ENSMUST00000194403.1|ENSMUSG00000104487.1|OTTMUSG00000051392.1|OTTMUST00000129933.1|Gm31373-001|Gm31373|737|	2225	737	0.0775335	0.0359801	0	0	1	1	0	1	3	1	0	1	0	0	1	3
ENST00000576738.1|ENSG00000262585.1|OTTHUMG00000177487.1|OTTHUMT00000437142.1|RP11-353N14.5-001|RP11-353N14.5|5271|	ENSMUST00000144096.1|ENSMUSG00000086547.1|OTTMUSG00000004004.1|OTTMUST00000008894.1|Gm11755-001|Gm11755|891|	5271	891	0.0775256	0.035994	0	1	2	3	1	0	7	0	0	0	0	0	0	0
ENST00000563993.5|ENSG00000260498.5|OTTHUMG00000176390.1|OTTHUMT00000431891.1|RP4-536B24.4-001|RP4-536B24.4|575|	ENSMUST00000182352.1|ENSMUSG00000098184.1|OTTMUSG00000043048.1|OTTMUST00000112986.1|Gm27011-001|Gm27011|972|	575	972	0.0775214	0.0360013	0	1	0	0	0	0	1	0	0	1	1	0	0	2
ENST00000623126.1|ENSG00000279174.1|OTTHUMG00000178227.1|OTTHUMT00000441044.1|RP11-1099M24.9-001|RP11-1099M24.9|3052|	ENSMUST00000124108.1|ENSMUSG00000086591.1|OTTMUSG00000005981.1|OTTMUST00000013378.1|Dnah2os-001|Dnah2os|859|	3052	859	0.0774566	0.0361153	0	1	2	2	0	0	5	0	0	1	0	0	0	1
ENST00000584276.1|ENSG00000266601.1|OTTHUMG00000178294.1|OTTHUMT00000441402.1|RP11-6N17.3-001|RP11-6N17.3|335|	ENSMUST00000135825.8|ENSMUSG00000078700.10|OTTMUSG00000001729.4|OTTMUST00000003429.2|D030028A08Rik-002|D030028A08Rik|2801|	335	2801	0.077391	0.0362308	0	0	0	0	0	0	0	0	0	0	0	1	0	1
ENST00000456532.1|ENSG00000231566.1|OTTHUMG00000021411.1|OTTHUMT00000056347.1|RP5-1158E12.3-001|RP5-1158E12.3|375|	ENSMUST00000180592.1|ENSMUSG00000097497.1|OTTMUSG00000042945.1|OTTMUST00000112779.1|Gm26652-002|Gm26652|373|	375	373	0.0773436	0.0363144	0	0	0	0	0	0	0	0	0	0	0	0	0	0
ENST00000412674.1|ENSG00000233304.6|OTTHUMG00000000499.3|OTTHUMT00000001241.1|LINC01346-001|LINC01346|3242|	ENSMUST00000141582.1|ENSMUSG00000086272.1|OTTMUSG00000010510.1|OTTMUST00000024518.1|BC039966-001|BC039966|1371|	3242	1371	0.0773207	0.0363549	0	0	1	1	1	2	5	0	0	0	0	0	1	1
ENST00000379640.1|ENSG00000205325.1|OTTHUMG00000058812.1|OTTHUMT00000130001.1|AC005863.1-001|AC005863.1|2998|	ENSMUST00000151765.1|ENSMUSG00000085113.1|OTTMUSG00000005887.1|OTTMUST00000013108.1|B130011K05Rik-001|B130011K05Rik|3270|	2998	3270	0.0773185	0.0363589	1	0	0	0	0	1	2	0	0	0	0	0	2	2
ENST00000624885.1|ENSG00000280354.1|OTTHUMG00000168626.1|OTTHUMT00000400417.1|RP11-83B20.4-001|RP11-83B20.4|371|	ENSMUST00000196503.1|ENSMUSG00000105604.1|OTTMUSG00000054998.1|OTTMUST00000136292.1|Gm42838-001|Gm42838|439|	371	439	0.0773095	0.0363749	0	0	0	1	0	0	1	0	0	0	0	0	0	0
ENST00000606898.1|ENSG00000272094.1|OTTHUMG00000185352.1|OTTHUMT00000470300.1|RP4-665J23.4-001|RP4-665J23.4|879|	ENSMUST00000200044.1|ENSMUSG00000104706.1|OTTMUSG00000053902.1|OTTMUST00000134101.1|Gm43421-001|Gm43421|2905|	879	2905	0.0772821	0.0364234	0	1	0	0	0	1	2	1	0	0	0	0	1	2
ENST00000623742.1|ENSG00000279425.1|OTTHUMG00000183393.1|OTTHUMT00000466450.1|CTD-2017D11.2-001|CTD-2017D11.2|2189|	ENSMUST00000165145.2|ENSMUSG00000092103.2|OTTMUSG00000036832.4|OTTMUST00000094594.2|Gm17039-001|Gm17039|4901|	2189	4901	0.0772598	0.0364628	0	0	0	0	0	0	0	2	0	0	0	0	0	2
ENST00000617352.1|ENSG00000203804.4|OTTHUMG00000034866.2|OTTHUMT00000474034.1|ADAMTSL4-AS1-002|ADAMTSL4-AS1|1036|	ENSMUST00000192059.1|ENSMUSG00000103900.1|OTTMUSG00000017114.30|OTTMUST00000120950.29|Gm37500-001|Gm37500|1443|	1036	1443	0.0770768	0.0367887	1	0	0	0	0	1	2	0	0	1	1	0	0	2
ENST00000455981.1|ENSG00000224307.1|OTTHUMG00000020775.2|OTTHUMT00000054569.2|RP11-344B5.2-001|RP11-344B5.2|583|	ENSMUST00000145389.2|ENSMUSG00000085224.2|OTTMUSG00000012072.2|OTTMUST00000028723.2|Gm13425-001|Gm13425|5391|	583	5391	0.0770131	0.0369027	0	0	1	1	0	0	2	1	0	6	6	0	0	13
ENST00000624088.1|ENSG00000279861.1|OTTHUMG00000183421.1|OTTHUMT00000466547.1|RP11-43N16.4-001|RP11-43N16.4|1882|	ENSMUST00000210035.1|ENSMUSG00000109984.1|OTTMUSG00000060703.1|OTTMUST00000148416.1|RP24-466N11.9-001|RP24-466N11.9|688|	1882	688	0.0769876	0.0369483	0	0	1	2	0	1	4	0	0	0	0	0	0	0
ENST00000566699.1|ENSG00000260231.1|OTTHUMG00000173155.1|OTTHUMT00000422281.1|JHDM1D-AS1-001|JHDM1D-AS1|2380|	ENSMUST00000156905.1|ENSMUSG00000068601.2|OTTMUSG00000024515.3|OTTMUST00000060163.1|Gm10244-002|Gm10244|474|	2380	474	0.0767981	0.0372895	0	0	1	1	0	1	3	0	0	1	1	0	0	2
ENST00000414042.1|ENSG00000226332.2|OTTHUMG00000032910.1|OTTHUMT00000080024.1|RP11-157P1.4-001|RP11-157P1.4|681|	ENSMUST00000145549.1|ENSMUSG00000084843.1|OTTMUSG00000016334.1|OTTMUST00000039249.1|B230312C02Rik-001|B230312C02Rik|1703|	681	1703	0.0766657	0.0375295	0	0	0	0	0	0	0	0	0	1	1	0	0	2
ENST00000494761.1|ENSG00000239454.1|OTTHUMG00000158838.1|OTTHUMT00000352391.1|RP11-508O18.1-001|RP11-508O18.1|1371|	ENSMUST00000204338.1|ENSMUSG00000107421.1|OTTMUSG00000056908.1|OTTMUST00000140332.1|Gm44177-001|Gm44177|2667|	1371	2667	0.0766022	0.037645	0	0	1	0	0	0	1	1	0	0	0	0	3	4
ENST00000300167.6|ENSG00000166917.9|OTTHUMG00000170605.1|OTTHUMT00000409806.1|MIR202HG-001|MIR202HG|384|	ENSMUST00000130771.1|ENSMUSG00000085354.1|OTTMUSG00000031694.1|OTTMUST00000078514.1|Gm2044-001|Gm2044|911|	384	911	0.0765618	0.0377188	0	0	1	1	0	0	2	0	0	0	0	0	0	0
ENST00000607121.5|ENSG00000271858.5|OTTHUMG00000185536.1|OTTHUMT00000470672.1|CYB561D2-005|CYB561D2|1004|	ENSMUST00000181099.1|ENSMUSG00000097099.2|OTTMUSG00000050868.2|OTTMUST00000128891.1|Gm9917-003|Gm9917|1499|	1004	1499	0.0765483	0.0377434	0	0	2	2	0	0	4	1	0	0	1	0	0	2
ENST00000588286.1|ENSG00000236144.6|OTTHUMG00000048104.2|OTTHUMT00000460430.1|TMEM147-AS1-004|TMEM147-AS1|3911|	ENSMUST00000206345.1|ENSMUSG00000097750.2|OTTMUSG00000044611.2|OTTMUST00000142476.1|Gm4673-002|Gm4673|946|	3911	946	0.0765236	0.0377885	1	0	3	2	0	0	6	1	0	1	1	0	0	3
ENST00000522771.6|ENSG00000214548.14|OTTHUMG00000029052.8|OTTHUMT00000381135.2|MEG3-015|MEG3|6984|	ENSMUST00000193116.1|ENSMUSG00000102657.1|OTTMUSG00000043494.1|OTTMUST00000114057.1|Gm37899-001|Gm37899|8717|	6984	8717	0.0764465	0.0379298	0	0	1	1	0	1	3	1	0	0	0	2	5	8
ENST00000603952.1|ENSG00000270223.1|OTTHUMG00000184201.1|OTTHUMT00000468298.1|RP13-36G14.4-001|RP13-36G14.4|905|	ENSMUST00000130063.7|ENSMUSG00000086370.8|OTTMUSG00000018310.2|OTTMUST00000044290.1|Ftx-002|Ftx|4275|	905	4275	0.0763675	0.0380749	0	0	0	0	0	0	0	1	0	2	0	1	4	8
ENST00000316786.1|ENSG00000179082.3|OTTHUMG00000020781.2|OTTHUMT00000054576.2|C9orf106-001|C9orf106|3145|	ENSMUST00000134920.1|ENSMUSG00000087435.1|OTTMUSG00000033582.1|OTTMUST00000084592.1|Gm16323-001|Gm16323|556|	3145	556	0.076353	0.0381015	1	0	1	1	1	0	4	0	0	0	0	0	0	0
ENST00000479610.1|ENSG00000240562.1|OTTHUMG00000159638.1|OTTHUMT00000356623.1|RP11-59J16.2-001|RP11-59J16.2|697|	ENSMUST00000204722.1|ENSMUSG00000107732.1|OTTMUSG00000057672.1|OTTMUST00000141708.1|Gm44204-001|Gm44204|737|	697	737	0.0763318	0.0381406	0	0	1	1	0	0	2	0	0	0	1	0	0	1
ENST00000592569.1|ENSG00000266970.1|OTTHUMG00000177663.1|OTTHUMT00000438293.1|RP11-806H10.4-001|RP11-806H10.4|777|	ENSMUST00000134069.1|ENSMUSG00000085511.1|OTTMUSG00000003885.1|OTTMUST00000008572.1|Gm11738-001|Gm11738|2158|	777	2158	0.0762767	0.0382421	0	0	1	0	0	0	1	0	0	2	0	0	1	3
ENST00000500689.1|ENSG00000245598.6|OTTHUMG00000165987.1|OTTHUMT00000387312.1|DACT3-AS1-001|DACT3-AS1|1304|	ENSMUST00000205647.1|ENSMUSG00000097842.2|OTTMUSG00000058161.1|OTTMUST00000142822.1|9330104G04Rik-002|9330104G04Rik|1943|	1304	1943	0.0761749	0.0384305	0	0	1	0	0	0	1	0	0	0	0	0	0	0
ENST00000455711.1|ENSG00000237119.1|OTTHUMG00000032954.1|OTTHUMT00000080109.1|LINC01056-001|LINC01056|1234|	ENSMUST00000183124.1|ENSMUSG00000098051.1|OTTMUSG00000043553.1|OTTMUST00000114313.1|Gm27032-001|Gm27032|1116|	1234	1116	0.076153	0.0384712	0	0	1	1	0	0	2	0	0	1	2	0	0	3
ENST00000617006.1|ENSG00000275719.1|OTTHUMG00000186769.1|OTTHUMT00000473744.1|CTB-147N14.6-001|CTB-147N14.6|1229|	ENSMUST00000181501.2|ENSMUSG00000097842.2|OTTMUSG00000058161.1|OTTMUST00000142821.1|9330104G04Rik-001|9330104G04Rik|2242|	1229	2242	0.0761117	0.038548	0	0	0	0	0	0	0	0	0	0	1	0	0	1
ENST00000563593.1|ENSG00000259910.1|OTTHUMG00000172994.1|OTTHUMT00000421610.1|RP11-616M22.2-001|RP11-616M22.2|476|	ENSMUST00000163493.2|ENSMUSG00000091475.2|OTTMUSG00000038221.2|OTTMUST00000098396.2|2810468N07Rik-001|2810468N07Rik|1349|	476	1349	0.076068	0.0386293	0	0	1	1	0	0	2	0	0	0	1	0	0	1
ENST00000457079.1|ENSG00000224652.1|OTTHUMG00000155713.1|OTTHUMT00000341345.1|LINC00885-001|LINC00885|1828|	ENSMUST00000141256.1|ENSMUSG00000075265.4|OTTMUSG00000025425.2|OTTMUST00000062603.1|Tnk2os-001|Tnk2os|1392|	1828	1392	0.0760199	0.0387188	0	0	2	1	0	0	3	0	0	1	1	0	0	2
ENST00000620519.1|ENSG00000275764.1|OTTHUMG00000187154.2|OTTHUMT00000474502.2|RP11-582E3.6-001|RP11-582E3.6|1861|	ENSMUST00000203084.1|ENSMUSG00000108108.1|OTTMUSG00000057284.1|OTTMUST00000140999.1|Gm44270-001|Gm44270|1234|	1861	1234	0.0759681	0.0388157	1	0	0	0	0	1	2	0	0	0	0	0	0	0
ENST00000557792.1|ENSG00000245694.9|OTTHUMG00000172236.3|OTTHUMT00000417439.1|CRNDE-005|CRNDE|481|	ENSMUST00000210400.1|ENSMUSG00000109696.1|OTTMUSG00000061519.1|OTTMUST00000150083.1|RP24-486I4.3-001|RP24-486I4.3|1405|	481	1405	0.0759527	0.0388444	0	0	1	1	0	0	2	0	1	0	0	1	0	2
ENST00000437040.1|ENSG00000234206.5|OTTHUMG00000015310.1|OTTHUMT00000041689.1|RP1-67A8.3-002|RP1-67A8.3|329|	ENSMUST00000187332.1|ENSMUSG00000099893.1|OTTMUSG00000046586.2|OTTMUST00000121124.2|Gm29245-001|Gm29245|1416|	329	1416	0.075938	0.0388719	0	0	0	0	0	0	0	0	0	0	0	0	1	1
ENST00000601909.1|ENSG00000269489.1|OTTHUMG00000183006.1|OTTHUMT00000464654.1|RP11-98D18.17-001|RP11-98D18.17|549|	ENSMUST00000198380.1|ENSMUSG00000105412.1|OTTMUSG00000052208.1|OTTMUST00000131169.1|Gm43768-001|Gm43768|1258|	549	1258	0.0757176	0.0392864	0	0	0	0	0	0	0	1	0	1	0	0	1	3
ENST00000602587.5|ENSG00000229807.10|OTTHUMG00000021839.5|OTTHUMT00000467479.1|XIST-010|XIST|583|	ENSMUST00000130063.7|ENSMUSG00000086370.8|OTTMUSG00000018310.2|OTTMUST00000044290.1|Ftx-002|Ftx|4275|	583	4275	0.0755904	0.0395274	0	0	0	0	0	1	1	1	0	2	0	1	4	8
ENST00000546936.2|ENSG00000258162.2|OTTHUMG00000170247.2|OTTHUMT00000408180.2|RP11-315E17.1-001|RP11-315E17.1|1615|	ENSMUST00000181196.1|ENSMUSG00000097869.1|-|-|C230021G24Rik-201|C230021G24Rik|3679|	1615	3679	0.075446	0.0398024	1	0	0	0	0	3	4	2	0	1	0	0	1	4
ENST00000414368.2|ENSG00000226620.7|OTTHUMG00000017317.3|OTTHUMT00000472696.1|LINC00343-011|LINC00343|864|	ENSMUST00000185463.1|ENSMUSG00000099890.2|OTTMUSG00000048991.1|OTTMUST00000125153.1|Gm28262-002|Gm28262|477|	864	477	0.0754164	0.0398589	0	0	0	0	0	0	0	0	0	0	0	0	0	0
ENST00000571815.1|ENSG00000262810.1|OTTHUMG00000177681.1|OTTHUMT00000438487.1|RP11-667K14.5-001|RP11-667K14.5|528|	ENSMUST00000125962.1|ENSMUSG00000085359.1|OTTMUSG00000006209.1|OTTMUST00000014005.1|Gm12336-001|Gm12336|322|	528	322	0.0753292	0.040026	1	0	0	0	0	0	1	0	0	0	0	0	0	0
ENST00000528549.1|ENSG00000255399.3|OTTHUMG00000166190.2|OTTHUMT00000475305.1|TBX5-AS1-005|TBX5-AS1|3620|	ENSMUST00000201152.1|ENSMUSG00000106795.1|OTTMUSG00000056235.1|OTTMUST00000138981.1|Gm43050-002|Gm43050|651|	3620	651	0.0753196	0.0400444	1	0	0	1	0	1	3	0	0	0	1	0	0	1
ENST00000623562.1|ENSG00000279136.1|OTTHUMG00000172814.1|OTTHUMT00000420619.1|LA16c-335H7.2-001|LA16c-335H7.2|325|	ENSMUST00000148064.1|ENSMUSG00000084862.1|OTTMUSG00000033061.1|OTTMUST00000082561.1|Gm16278-001|Gm16278|2071|	325	2071	0.0753149	0.0400535	0	0	1	1	0	0	2	0	0	2	2	0	0	4
ENST00000527209.1|ENSG00000204666.3|OTTHUMG00000165525.1|OTTHUMT00000384643.1|FLJ26850-001|FLJ26850|1525|	ENSMUST00000208849.1|ENSMUSG00000108832.1|OTTMUSG00000058965.1|OTTMUST00000144672.1|Gm44832-001|Gm44832|2303|	1525	2303	0.0752822	0.0401163	1	0	1	0	0	0	2	0	0	1	1	0	0	2
ENST00000442526.2|ENSG00000230555.2|OTTHUMG00000018028.2|OTTHUMT00000047701.2|RP11-517P14.2-001|RP11-517P14.2|760|	ENSMUST00000204444.1|ENSMUSG00000042087.5|OTTMUSG00000056754.1|OTTMUST00000140044.1|4933440N22Rik-001|4933440N22Rik|1952|	760	1952	0.0752668	0.0401458	0	0	0	0	0	0	0	0	1	2	2	0	0	5
ENST00000607100.5|ENSG00000228784.7|OTTHUMG00000151773.2|OTTHUMT00000470577.1|LINC00954-005|LINC00954|2239|	ENSMUST00000151816.1|ENSMUSG00000042976.5|OTTMUSG00000033110.1|OTTMUST00000082763.1|9930038B18Rik-001|9930038B18Rik|3872|	2239	3872	0.0752311	0.0402146	0	0	0	1	0	0	1	0	0	1	0	1	0	2
ENST00000624920.1|ENSG00000280407.2|OTTHUMG00000178833.1|OTTHUMT00000443504.1|RP13-516M14.8-001|RP13-516M14.8|2778|	ENSMUST00000138256.1|ENSMUSG00000087638.1|OTTMUSG00000004157.1|OTTMUST00000009418.1|Gm11773-001|Gm11773|497|	2778	497	0.0752227	0.0402308	0	0	3	2	1	0	6	0	0	0	0	0	0	0
ENST00000371629.1|ENSG00000198454.2|OTTHUMG00000020969.1|OTTHUMT00000055250.1|PRR31-001|PRR31|978|	ENSMUST00000151069.1|ENSMUSG00000087612.1|OTTMUSG00000012624.1|OTTMUST00000030053.1|A230005M16Rik-002|A230005M16Rik|1022|	978	1022	0.0752023	0.0402701	0	0	0	1	0	0	1	0	1	1	1	1	1	5
ENST00000607074.1|ENSG00000227508.6|OTTHUMG00000016077.2|OTTHUMT00000470296.1|LINC01624-003|LINC01624|3265|	ENSMUST00000181251.1|ENSMUSG00000097566.1|-|-|A930024N18Rik-201|A930024N18Rik|3955|	3265	3955	0.0751641	0.0403439	0	0	1	2	0	0	3	1	0	6	3	0	1	11
ENST00000579352.1|ENSG00000264177.1|OTTHUMG00000179473.1|OTTHUMT00000446568.1|RP1-37N7.1-001|RP1-37N7.1|4955|	ENSMUST00000123544.1|ENSMUSG00000042549.10|OTTMUSG00000005821.1|OTTMUST00000012915.1|Map2k3os-001|Map2k3os|1291|	4955	1291	0.0749972	0.0406673	0	0	5	7	0	0	12	0	0	1	1	0	0	2
ENST00000456327.1|ENSG00000232044.6|OTTHUMG00000151462.2|OTTHUMT00000322750.1|LINC01105-002|LINC01105|1434|	ENSMUST00000183238.1|ENSMUSG00000094002.2|OTTMUSG00000043127.1|OTTMUST00000113184.1|Gm9866-003|Gm9866|351|	1434	351	0.0749137	0.0408299	0	0	0	0	0	0	0	0	0	0	0	0	0	0
ENST00000567749.1|ENSG00000260423.1|OTTHUMG00000172909.2|OTTHUMT00000421339.1|RP13-735L24.1-001|RP13-735L24.1|4388|	ENSMUST00000181825.1|ENSMUSG00000096931.1|-|-|Gm26656-201|Gm26656|2972|	4388	2972	0.0748771	0.0409015	0	0	0	0	0	2	2	2	0	0	1	0	2	5
ENST00000569588.1|ENSG00000260305.1|OTTHUMG00000173016.1|OTTHUMT00000421716.1|NTRK3-AS1-001|NTRK3-AS1|2663|	ENSMUST00000064591.4|ENSMUSG00000052629.5|OTTMUSG00000047602.1|-|Gm9885-201|Gm9885|2205|	2663	2205	0.0748215	0.0410102	0	0	1	1	0	0	2	0	0	0	1	0	0	1
ENST00000624365.1|ENSG00000279942.1|OTTHUMG00000175913.1|OTTHUMT00000431266.1|RP1-153P14.7-001|RP1-153P14.7|3745|	ENSMUST00000149552.2|ENSMUSG00000086534.2|OTTMUSG00000035351.1|OTTMUST00000090244.1|Gm16758-001|Gm16758|3848|	3745	3848	0.0748134	0.0410262	0	0	0	1	1	0	2	0	0	2	0	0	0	2
ENST00000622604.4|ENSG00000224397.5|OTTHUMG00000032721.1|-|LINC01272-201|LINC01272|1808|	ENSMUST00000130679.1|ENSMUSG00000006462.6|OTTMUSG00000016306.1|OTTMUST00000039185.1|A530013C23Rik-002|A530013C23Rik|2555|	1808	2555	0.0747777	0.0410962	0	0	0	3	0	0	3	0	0	0	3	0	2	5
ENST00000619766.1|ENSG00000274269.1|OTTHUMG00000186550.1|OTTHUMT00000473328.1|RP4-545L17.12-001|RP4-545L17.12|572|	ENSMUST00000137422.1|ENSMUSG00000087035.1|OTTMUSG00000015811.1|OTTMUST00000037594.1|Tmem74bos-001|Tmem74bos|390|	572	390	0.0747052	0.0412387	0	0	0	0	0	1	1	0	0	0	0	0	0	0
ENST00000509964.1|ENSG00000250819.1|OTTHUMG00000160219.1|OTTHUMT00000359704.1|RP11-576E20.1-001|RP11-576E20.1|1704|	ENSMUST00000197016.4|ENSMUSG00000029092.9|OTTMUSG00000053866.5|OTTMUST00000134032.4|D5Ertd615e-001|D5Ertd615e|3911|	1704	3911	0.0746426	0.0413619	0	0	0	0	0	1	1	2	0	1	0	0	2	5
ENST00000444200.1|ENSG00000235910.1|OTTHUMG00000150649.1|OTTHUMT00000319394.1|APOA1-AS-001|APOA1-AS|563|	ENSMUST00000156612.1|ENSMUSG00000074373.6|OTTMUSG00000028701.2|OTTMUST00000071078.2|Gm10680-001|Gm10680|702|	563	702	0.0745555	0.0415341	0	0	0	0	0	0	0	0	0	1	0	0	0	1
ENST00000538012.2|ENSG00000218416.4|OTTHUMG00000152371.2|OTTHUMT00000473388.1|PP14571-004|PP14571|1669|	ENSMUST00000188589.1|ENSMUSG00000101995.1|OTTMUSG00000048577.1|OTTMUST00000124454.1|Gm29480-001|Gm29480|1655|	1669	1655	0.0745515	0.041542	0	0	3	2	2	0	7	0	0	0	0	0	0	0
ENST00000435412.1|ENSG00000237687.2|OTTHUMG00000032927.1|OTTHUMT00000080056.1|LINC00686-001|LINC00686|332|	ENSMUST00000145549.1|ENSMUSG00000084843.1|OTTMUSG00000016334.1|OTTMUST00000039249.1|B230312C02Rik-001|B230312C02Rik|1703|	332	1703	0.0744821	0.0416796	0	0	0	0	0	0	0	0	0	1	1	0	0	2
ENST00000619924.1|ENSG00000267272.5|OTTHUMG00000181765.1|-|LINC01140-201|LINC01140|1034|	ENSMUST00000198564.1|ENSMUSG00000104969.1|OTTMUSG00000054995.1|OTTMUST00000136286.1|Gm43445-001|Gm43445|2091|	1034	2091	0.0743491	0.0419444	1	0	2	2	0	0	5	2	1	2	0	0	0	5
ENST00000518177.2|ENSG00000253379.5|OTTHUMG00000164448.1|OTTHUMT00000378848.1|RP11-1102P16.1-003|RP11-1102P16.1|773|	ENSMUST00000193148.1|ENSMUSG00000104209.1|OTTMUSG00000049161.1|OTTMUST00000125453.1|Gm37400-001|Gm37400|3605|	773	3605	0.0742145	0.0422137	0	0	0	0	0	0	0	0	0	0	0	1	0	1
ENST00000542620.1|ENSG00000255946.1|OTTHUMG00000169204.1|OTTHUMT00000402864.1|RP11-173P15.7-001|RP11-173P15.7|583|	ENSMUST00000138108.1|ENSMUSG00000086140.1|OTTMUSG00000014618.1|OTTMUST00000034670.1|Hnf1aos2-001|Hnf1aos2|442|	583	442	0.0741823	0.0422784	0	0	0	0	0	0	0	0	0	1	1	1	0	3
ENST00000565737.1|ENSG00000260919.1|OTTHUMG00000172816.2|OTTHUMT00000421165.1|CTD-3154N5.1-001|CTD-3154N5.1|498|	ENSMUST00000153106.1|ENSMUSG00000086624.1|OTTMUSG00000030814.1|OTTMUST00000076262.1|Gm16130-001|Gm16130|2799|	498	2799	0.0741188	0.0424061	0	0	1	1	0	0	2	0	0	0	1	0	0	1
ENST00000536397.1|ENSG00000255867.1|OTTHUMG00000169083.1|OTTHUMT00000402190.1|DENND5B-AS1-002|DENND5B-AS1|564|	ENSMUST00000047953.9|ENSMUSG00000085355.2|OTTMUSG00000024044.1|-|3010003L21Rik-201|3010003L21Rik|1729|	564	1729	0.074102	0.0424399	0	0	1	0	0	0	1	1	0	2	2	0	0	5
ENST00000597156.1|ENSG00000268120.1|OTTHUMG00000182532.1|OTTHUMT00000462256.1|CTD-3193O13.11-001|CTD-3193O13.11|667|	ENSMUST00000207266.1|ENSMUSG00000108955.1|OTTMUSG00000059164.1|OTTMUST00000145123.1|Gm44775-001|Gm44775|1456|	667	1456	0.0740712	0.042502	0	1	0	0	0	0	1	0	0	0	0	0	0	0
ENST00000543922.1|ENSG00000256814.1|OTTHUMG00000168552.1|OTTHUMT00000400217.1|RP11-158L12.5-001|RP11-158L12.5|585|	ENSMUST00000199788.1|ENSMUSG00000104793.1|OTTMUSG00000055094.1|OTTMUST00000136430.1|Gm43756-001|Gm43756|2838|	585	2838	0.0740192	0.0426071	0	0	1	1	0	1	3	0	0	0	1	0	0	1
ENST00000605573.1|ENSG00000270959.1|OTTHUMG00000185119.1|OTTHUMT00000469631.1|LPP-AS2-001|LPP-AS2|2852|	ENSMUST00000181640.1|ENSMUSG00000097867.1|-|-|Lppos-201|Lppos|1603|	2852	1603	0.0739395	0.0427687	0	0	1	1	0	0	2	0	0	1	1	0	0	2
ENST00000504129.1|ENSG00000248664.1|OTTHUMG00000162416.2|OTTHUMT00000368813.2|CTC-498J12.3-001|CTC-498J12.3|946|	ENSMUST00000185979.1|ENSMUSG00000100596.1|OTTMUSG00000047354.1|OTTMUST00000122363.1|Gm29502-001|Gm29502|3739|	946	3739	0.0738578	0.0429347	0	0	0	0	0	0	0	0	0	0	0	0	2	2
ENST00000563747.1|ENSG00000259793.1|OTTHUMG00000176291.1|OTTHUMT00000431727.1|RP11-400N9.1-001|RP11-400N9.1|2285|	ENSMUST00000187511.1|ENSMUSG00000101942.1|OTTMUSG00000048196.1|OTTMUST00000123746.1|Gm19582-001|Gm19582|841|	2285	841	0.0737702	0.0431134	0	0	1	1	0	0	2	1	0	1	1	0	0	3
ENST00000519427.1|ENSG00000253726.1|OTTHUMG00000164491.1|OTTHUMT00000378981.1|RP11-313C15.1-001|RP11-313C15.1|1722|	ENSMUST00000194564.1|ENSMUSG00000104149.1|OTTMUSG00000049211.1|OTTMUST00000125550.1|Gm37138-001|Gm37138|2089|	1722	2089	0.073749	0.0431565	0	0	0	0	0	0	0	2	0	1	0	0	5	8
ENST00000503496.5|ENSG00000250007.6|OTTHUMG00000172256.1|OTTHUMT00000417521.1|RP11-814P5.1-001|RP11-814P5.1|2727|	ENSMUST00000135729.7|ENSMUSG00000087694.8|OTTMUSG00000037154.1|OTTMUST00000095702.1|A530058N18Rik-002|A530058N18Rik|1405|	2727	1405	0.0736312	0.043398	0	0	0	0	0	1	1	0	0	0	0	0	0	0
ENST00000461864.5|ENSG00000239213.5|OTTHUMG00000159786.2|OTTHUMT00000357306.1|NCK1-AS1-001|NCK1-AS1|1194|	ENSMUST00000192389.1|ENSMUSG00000103657.1|OTTMUSG00000048623.1|OTTMUST00000124538.1|Gm37204-001|Gm37204|3961|	1194	3961	0.0736146	0.043432	0	0	0	0	0	0	0	2	0	0	0	0	3	5
ENST00000624998.1|ENSG00000279525.1|OTTHUMG00000187152.1|OTTHUMT00000474498.1|GS1-306C12.1-001|GS1-306C12.1|2398|	ENSMUST00000203438.1|ENSMUSG00000107668.1|OTTMUSG00000056906.1|OTTMUST00000140329.1|Gm44424-001|Gm44424|1826|	2398	1826	0.0735991	0.043464	0	0	0	0	0	1	1	0	0	0	0	0	2	2
ENST00000421637.1|ENSG00000228838.1|OTTHUMG00000008930.1|OTTHUMT00000024728.1|RP4-784A16.2-001|RP4-784A16.2|675|	ENSMUST00000097930.1|ENSMUSG00000073779.7|OTTMUSG00000009007.2|-|Lrp8os2-201|Lrp8os2|2991|	675	2991	0.073548	0.0435692	0	0	1	0	0	0	1	0	0	2	2	0	0	4
ENST00000556316.1|ENSG00000258520.1|OTTHUMG00000171322.1|OTTHUMT00000412988.1|RP11-363J20.2-001|RP11-363J20.2|578|	ENSMUST00000181852.1|ENSMUSG00000097801.1|-|-|Gm26777-201|Gm26777|2573|	578	2573	0.0733984	0.0438783	0	0	1	1	0	0	2	0	0	0	1	0	1	2
ENST00000500800.2|ENSG00000245112.2|OTTHUMG00000161539.1|OTTHUMT00000365239.1|SMARCA5-AS1-001|SMARCA5-AS1|945|	ENSMUST00000166229.2|ENSMUSG00000037982.16|OTTMUSG00000022385.2|-|Gm9725-201|Gm9725|2326|	945	2326	0.0732681	0.0441491	1	0	2	0	0	0	3	0	0	1	0	0	0	1
ENST00000461019.5|ENSG00000204934.10|OTTHUMG00000158095.2|OTTHUMT00000350180.1|ATP6V0E2-AS1-001|ATP6V0E2-AS1|2973|	ENSMUST00000203998.1|ENSMUSG00000107640.1|OTTMUSG00000057236.1|OTTMUST00000140904.1|Gm44119-001|Gm44119|767|	2973	767	0.0732499	0.0441871	1	0	2	2	0	0	5	0	0	1	0	0	0	1
ENST00000556354.5|ENSG00000157306.14|OTTHUMG00000187908.1|OTTHUMT00000413827.1|RP11-66N24.4-001|RP11-66N24.4|931|	ENSMUST00000181782.1|ENSMUSG00000097652.2|OTTMUSG00000047093.1|OTTMUST00000121891.1|Mhrt-001|Mhrt|828|	931	828	0.073227	0.0442348	0	0	0	0	0	0	0	0	0	0	0	0	0	0
ENST00000545254.1|ENSG00000256633.1|OTTHUMG00000167928.1|OTTHUMT00000397127.1|RP11-169D4.2-001|RP11-169D4.2|664|	ENSMUST00000210076.1|ENSMUSG00000109656.1|OTTMUSG00000060182.1|OTTMUST00000147295.1|RP24-126J17.5-001|RP24-126J17.5|3167|	664	3167	0.0731795	0.0443341	0	0	2	2	0	0	4	0	0	1	1	0	0	2
ENST00000433374.1|ENSG00000230928.1|OTTHUMG00000018875.1|OTTHUMT00000049767.1|RP11-34A14.3-001|RP11-34A14.3|1168|	ENSMUST00000159313.1|ENSMUSG00000090235.1|OTTMUSG00000032531.3|OTTMUST00000080951.1|Gm16244-001|Gm16244|2327|	1168	2327	0.0730818	0.0445387	1	0	1	1	0	1	4	0	0	0	0	0	1	1
ENST00000587767.1|ENSG00000267328.1|OTTHUMG00000182297.1|OTTHUMT00000460422.1|AC002398.12-001|AC002398.12|660|	ENSMUST00000146232.1|ENSMUSG00000094365.1|OTTMUSG00000042286.1|OTTMUST00000111253.1|Gm21982-001|Gm21982|3821|	660	3821	0.0730619	0.0445805	0	2	0	0	0	0	2	0	0	1	2	0	0	3
ENST00000564226.1|ENSG00000260500.1|OTTHUMG00000175718.1|OTTHUMT00000430897.1|CTD-3193O13.1-001|CTD-3193O13.1|506|	ENSMUST00000177130.7|ENSMUSG00000086805.9|OTTMUSG00000041988.1|OTTMUST00000109963.1|4932443L11Rik-001|4932443L11Rik|2827|	506	2827	0.0730614	0.0445816	0	0	2	1	0	0	3	0	0	1	1	0	1	3
ENST00000451960.1|ENSG00000234698.1|OTTHUMG00000032716.1|OTTHUMT00000079674.1|RP11-112L6.2-002|RP11-112L6.2|341|	ENSMUST00000124850.1|ENSMUSG00000087624.1|OTTMUSG00000016305.1|OTTMUST00000039183.1|9230111E07Rik-001|9230111E07Rik|811|	341	811	0.0730561	0.0445927	0	0	0	0	0	0	0	0	0	1	0	0	0	1
ENST00000553105.1|ENSG00000257176.2|OTTHUMG00000169321.2|OTTHUMT00000403488.1|RP11-996F15.2-001|RP11-996F15.2|2380|	ENSMUST00000203708.1|ENSMUSG00000107706.1|OTTMUSG00000057524.1|OTTMUST00000141445.1|Gm44022-001|Gm44022|5429|	2380	5429	0.0730486	0.0446084	0	0	0	0	0	1	1	1	0	0	0	1	4	6
ENST00000548722.2|ENSG00000257194.2|OTTHUMG00000170042.3|OTTHUMT00000406988.2|RP11-567C2.1-001|RP11-567C2.1|926|	ENSMUST00000192275.1|ENSMUSG00000102310.1|OTTMUSG00000047762.1|OTTMUST00000122985.1|Gm37631-001|Gm37631|364|	926	364	0.0730439	0.0446182	0	0	0	0	0	0	0	0	0	0	0	0	0	0
ENST00000537616.1|ENSG00000257027.1|OTTHUMG00000168442.1|OTTHUMT00000399756.1|RP11-705C15.3-001|RP11-705C15.3|2508|	ENSMUST00000181825.1|ENSMUSG00000096931.1|-|-|Gm26656-201|Gm26656|2972|	2508	2972	0.073035	0.044637	2	0	0	0	0	2	4	2	0	0	1	0	2	5
ENST00000382488.2|ENSG00000205959.3|OTTHUMG00000160092.3|OTTHUMT00000359211.3|RP11-689P11.2-001|RP11-689P11.2|3204|	ENSMUST00000193163.1|ENSMUSG00000103608.1|OTTMUSG00000037284.2|OTTMUST00000096189.2|4930442P19Rik-001|4930442P19Rik|1240|	3204	1240	0.0729712	0.0447714	0	1	0	1	1	0	3	0	0	2	1	0	0	3
ENST00000450458.1|ENSG00000234977.1|OTTHUMG00000151492.1|OTTHUMT00000322868.1|AC074389.7-001|AC074389.7|454|	ENSMUST00000198772.1|ENSMUSG00000105453.1|OTTMUSG00000054838.1|OTTMUST00000135881.1|Gm43702-001|Gm43702|2546|	454	2546	0.0729452	0.0448262	0	0	0	1	0	0	1	0	1	0	1	0	0	2
ENST00000507630.1|ENSG00000251456.1|OTTHUMG00000163254.1|OTTHUMT00000372360.1|RP11-436H11.5-001|RP11-436H11.5|558|	ENSMUST00000181829.1|ENSMUSG00000097707.1|-|-|Gm26742-201|Gm26742|3340|	558	3340	0.0728437	0.0450409	0	0	0	0	0	0	0	0	0	1	0	1	0	2
ENST00000428009.1|ENSG00000234948.1|OTTHUMG00000134297.2|OTTHUMT00000259160.1|LINC01524-002|LINC01524|4390|	ENSMUST00000144607.1|ENSMUSG00000086238.1|OTTMUSG00000016109.1|OTTMUST00000038490.1|Gm14258-001|Gm14258|2031|	4390	2031	0.0728307	0.0450683	1	0	0	0	0	1	2	1	1	0	0	1	3	6
ENST00000622936.1|ENSG00000278954.1|OTTHUMG00000179963.1|OTTHUMT00000449097.1|RP13-415G19.2-001|RP13-415G19.2|2466|	ENSMUST00000138915.1|ENSMUSG00000086031.1|OTTMUSG00000006271.1|OTTMUST00000014186.1|Gm12348-001|Gm12348|313|	2466	313	0.072812	0.0451081	0	0	3	3	0	0	6	0	0	0	1	0	0	1
ENST00000590932.5|ENSG00000237298.9|OTTHUMG00000133536.10|OTTHUMT00000458922.1|TTN-AS1-012|TTN-AS1|701|	ENSMUST00000156809.1|ENSMUSG00000086354.2|OTTMUSG00000015133.1|OTTMUST00000035897.1|Gm13938-002|Gm13938|493|	701	493	0.0727916	0.0451514	1	0	0	0	0	1	2	0	0	0	0	0	0	0
ENST00000576859.1|ENSG00000262098.1|OTTHUMG00000177696.1|OTTHUMT00000438543.1|CTD-2561B21.10-001|CTD-2561B21.10|368|	ENSMUST00000139014.1|ENSMUSG00000043993.6|OTTMUSG00000004130.2|OTTMUST00000009324.2|2900052L18Rik-001|2900052L18Rik|1588|	368	1588	0.0727469	0.0452464	0	0	0	0	0	0	0	0	0	1	1	0	0	2
ENST00000620495.1|ENSG00000260135.6|OTTHUMG00000176716.2|OTTHUMT00000474049.1|RP11-212I21.2-003|RP11-212I21.2|625|	ENSMUST00000211295.1|ENSMUSG00000109669.1|OTTMUSG00000061537.1|OTTMUST00000150116.1|RP23-312E2.1-001|RP23-312E2.1|1426|	625	1426	0.0727407	0.0452595	0	0	0	0	0	0	0	1	0	1	2	1	1	6
ENST00000572242.1|ENSG00000224870.6|OTTHUMG00000002908.4|OTTHUMT00000439303.1|RP4-758J18.2-006|RP4-758J18.2|2228|	ENSMUST00000097740.2|ENSMUSG00000073679.2|OTTMUSG00000010894.2|OTTMUST00000025539.2|Mxra8os-001|Mxra8os|687|	2228	687	0.0727292	0.0452838	0	0	1	0	0	0	1	0	0	1	2	0	0	3
ENST00000505844.1|ENSG00000248455.5|OTTHUMG00000161871.1|OTTHUMT00000366264.1|RP11-321E2.3-003|RP11-321E2.3|687|	ENSMUST00000195357.1|ENSMUSG00000103315.1|OTTMUSG00000047321.1|OTTMUST00000122323.1|Gm38341-001|Gm38341|515|	687	515	0.0727185	0.0453067	0	0	0	0	0	0	0	0	0	0	0	0	0	0
ENST00000587099.1|ENSG00000267034.1|OTTHUMG00000180633.1|OTTHUMT00000452291.1|RP11-384O8.1-001|RP11-384O8.1|1412|	ENSMUST00000195509.1|ENSMUSG00000104018.1|OTTMUSG00000047792.1|OTTMUST00000123037.1|4833412K13Rik-001|4833412K13Rik|1479|	1412	1479	0.0726895	0.0453686	1	0	0	0	0	0	1	0	1	0	0	0	1	2
ENST00000613771.1|ENSG00000277186.1|OTTHUMG00000187079.1|OTTHUMT00000474381.1|RP13-554M15.8-001|RP13-554M15.8|668|	ENSMUST00000180866.1|ENSMUSG00000097904.1|-|-|Gm26711-201|Gm26711|1833|	668	1833	0.0726748	0.0453998	0	0	0	1	0	0	1	0	0	2	3	0	0	5
ENST00000569473.1|ENSG00000261441.1|OTTHUMG00000172885.2|OTTHUMT00000422015.1|RP11-217B1.2-002|RP11-217B1.2|1109|	ENSMUST00000183043.7|ENSMUSG00000097023.8|OTTMUSG00000043217.2|OTTMUST00000113395.1|Mir9-3hg-004|Mir9-3hg|643|	1109	643	0.0726027	0.0455539	0	0	0	1	0	0	1	0	0	1	1	0	0	2
ENST00000433238.5|ENSG00000232907.7|OTTHUMG00000032391.4|OTTHUMT00000471507.1|DLGAP4-AS1-005|DLGAP4-AS1|593|	ENSMUST00000147187.1|ENSMUSG00000085524.1|OTTMUSG00000016000.1|OTTMUST00000038101.1|Gm14224-001|Gm14224|864|	593	864	0.0725802	0.045602	0	0	1	1	0	0	2	0	0	1	0	0	0	1
ENST00000567305.1|ENSG00000261379.1|OTTHUMG00000176332.1|OTTHUMT00000431771.1|RP11-395N3.1-001|RP11-395N3.1|1026|	ENSMUST00000194744.1|ENSMUSG00000104493.1|OTTMUSG00000047950.1|OTTMUST00000123295.1|Gm19552-001|Gm19552|2833|	1026	2833	0.0725746	0.0456139	0	0	0	0	0	0	0	0	0	0	0	0	1	1
ENST00000434250.1|ENSG00000234055.1|OTTHUMG00000046129.3|OTTHUMT00000106335.1|RP11-247A12.1-001|RP11-247A12.1|241|	ENSMUST00000145389.2|ENSMUSG00000085224.2|OTTMUSG00000012072.2|OTTMUST00000028723.2|Gm13425-001|Gm13425|5391|	241	5391	0.0725721	0.0456192	0	0	0	0	0	0	0	1	0	6	6	0	0	13
ENST00000564292.5|ENSG00000267568.6|OTTHUMG00000177279.4|OTTHUMT00000436093.2|RP11-87G24.3-001|RP11-87G24.3|610|	ENSMUST00000134069.1|ENSMUSG00000085511.1|OTTMUSG00000003885.1|OTTMUST00000008572.1|Gm11738-001|Gm11738|2158|	610	2158	0.0725223	0.045726	0	0	1	1	0	0	2	0	0	2	0	0	1	3
ENST00000412162.1|ENSG00000229989.3|OTTHUMG00000035888.2|OTTHUMT00000087435.1|MIR181A1HG-002|MIR181A1HG|942|	ENSMUST00000182158.1|ENSMUSG00000098206.1|OTTMUSG00000043199.1|OTTMUST00000113293.1|A430106G13Rik-001|A430106G13Rik|3388|	942	3388	0.0724952	0.0457842	0	0	0	0	0	1	1	1	0	0	0	1	4	6
ENST00000602388.1|ENSG00000269935.1|OTTHUMG00000183883.1|OTTHUMT00000467269.1|RP11-482M8.3-001|RP11-482M8.3|1665|	ENSMUST00000182352.1|ENSMUSG00000098184.1|OTTMUSG00000043048.1|OTTMUST00000112986.1|Gm27011-001|Gm27011|972|	1665	972	0.0724224	0.0459407	0	0	1	1	0	0	2	0	0	1	1	0	0	2
ENST00000392227.2|ENSG00000227392.1|OTTHUMG00000182475.2|OTTHUMT00000461582.1|HPN-AS1-001|HPN-AS1|1124|	ENSMUST00000181958.1|ENSMUSG00000097149.1|OTTMUSG00000045675.1|OTTMUST00000119580.1|G630030J09Rik-001|G630030J09Rik|2135|	1124	2135	0.0723821	0.0460277	1	0	1	0	0	0	2	0	0	2	2	1	1	6
ENST00000509655.2|ENSG00000251405.2|OTTHUMG00000163480.2|OTTHUMT00000373684.1|CTB-109A12.1-001|CTB-109A12.1|1992|	ENSMUST00000169764.1|ENSMUSG00000086981.2|OTTMUSG00000005499.2|-|Gm12171-201|Gm12171|327|	1992	327	0.0722875	0.0462322	1	0	1	1	0	2	5	0	0	1	0	0	0	1
ENST00000411721.1|ENSG00000229956.10|OTTHUMG00000009733.10|OTTHUMT00000026633.1|ZRANB2-AS2-043|ZRANB2-AS2|518|	ENSMUST00000144350.1|ENSMUSG00000086708.1|OTTMUSG00000024006.1|OTTMUST00000058681.1|Gm15577-001|Gm15577|2293|	518	2293	0.0722467	0.0463206	1	0	0	0	0	0	1	0	0	0	0	0	0	0
ENST00000591754.1|ENSG00000267659.5|OTTHUMG00000180190.1|OTTHUMT00000450169.1|LINC01482-002|LINC01482|390|	ENSMUST00000147006.1|ENSMUSG00000087139.1|OTTMUSG00000003346.1|OTTMUST00000007034.1|Gm11683-001|Gm11683|918|	390	918	0.0722229	0.0463721	0	0	0	0	0	0	0	0	0	1	0	0	0	1
ENST00000426965.1|ENSG00000237380.6|OTTHUMG00000154174.3|OTTHUMT00000334240.1|HOXD-AS2-002|HOXD-AS2|927|	ENSMUST00000100000.2|ENSMUSG00000075277.4|OTTMUSG00000016593.1|-|Haglr-201|Haglr|2085|	927	2085	0.0722085	0.0464034	0	0	1	0	0	0	1	0	0	3	0	0	0	3
ENST00000427949.1|ENSG00000235862.2|OTTHUMG00000041085.1|OTTHUMT00000098530.1|RP11-338C15.5-001|RP11-338C15.5|2225|	ENSMUST00000181050.1|ENSMUSG00000097845.2|OTTMUSG00000051406.1|-|A230020J21Rik-201|A230020J21Rik|837|	2225	837	0.0722034	0.0464147	0	0	1	1	0	1	3	1	0	1	1	0	0	3
ENST00000461398.3|ENSG00000239921.3|OTTHUMG00000159643.3|OTTHUMT00000396610.2|LINC01471-001|LINC01471|3079|	ENSMUST00000203158.1|ENSMUSG00000107966.1|OTTMUSG00000057443.1|OTTMUST00000141303.1|Gm44001-001|Gm44001|3773|	3079	3773	0.0721923	0.0464387	0	0	1	0	0	0	1	0	0	1	0	1	0	2
ENST00000554022.1|ENSG00000258554.1|OTTHUMG00000170576.1|OTTHUMT00000409662.1|RP11-973D8.4-001|RP11-973D8.4|565|	ENSMUST00000187855.1|ENSMUSG00000100548.1|OTTMUSG00000045815.1|OTTMUST00000119763.1|Gm29585-002|Gm29585|425|	565	425	0.0721558	0.0465182	1	0	2	0	1	0	4	0	0	0	0	0	0	0
ENST00000549651.1|ENSG00000257815.5|OTTHUMG00000169445.1|OTTHUMT00000404077.1|LINC01481-002|LINC01481|883|	ENSMUST00000144020.7|ENSMUSG00000085837.8|OTTMUSG00000033684.2|OTTMUST00000084858.1|Kcnmb4os2-001|Kcnmb4os2|1591|	883	1591	0.0720988	0.0466423	1	0	1	0	0	1	3	0	0	2	1	0	0	3
ENST00000589967.1|ENSG00000266985.1|OTTHUMG00000180471.1|OTTHUMT00000451442.1|CTD-2329C7.2-001|CTD-2329C7.2|1389|	ENSMUST00000206742.1|ENSMUSG00000108575.1|OTTMUSG00000058168.1|OTTMUST00000142835.1|Gm45229-001|Gm45229|1140|	1389	1140	0.0720168	0.0468214	0	0	2	2	0	0	4	0	0	1	1	0	0	2
ENST00000442214.1|ENSG00000214691.7|OTTHUMG00000152301.4|OTTHUMT00000325743.2|AC104654.1-002|AC104654.1|741|	ENSMUST00000187700.1|ENSMUSG00000100154.1|OTTMUSG00000047829.1|OTTMUST00000123085.1|Gm29052-001|Gm29052|1451|	741	1451	0.0719975	0.0468636	0	0	0	0	0	0	0	0	0	0	0	0	1	1
ENST00000505522.4|ENSG00000281398.2|OTTHUMG00000189582.1|OTTHUMT00000373023.1|SNHG4-001|SNHG4|629|	ENSMUST00000181664.7|ENSMUSG00000097769.7|OTTMUSG00000045484.3|OTTMUST00000119290.2|Snhg4-001|Snhg4|1190|	629	1190	0.0719638	0.0469375	0	0	0	0	0	1	1	0	0	0	0	0	0	0
ENST00000548595.1|ENSG00000257553.1|OTTHUMG00000170262.1|OTTHUMT00000408229.1|RP11-603J24.17-001|RP11-603J24.17|434|	ENSMUST00000185270.1|ENSMUSG00000100548.1|OTTMUSG00000045815.1|OTTMUST00000119764.1|Gm29585-001|Gm29585|514|	434	514	0.0719179	0.0470382	0	0	0	1	0	0	1	0	0	0	1	0	0	1
ENST00000419151.2|ENSG00000230969.2|OTTHUMG00000059263.2|OTTHUMT00000131475.2|AC104024.2-001|AC104024.2|400|	ENSMUST00000145533.7|ENSMUSG00000072893.12|OTTMUSG00000005795.1|OTTMUST00000012822.1|4933439C10Rik-002|4933439C10Rik|1883|	400	1883	0.0719048	0.047067	0	0	0	0	0	0	0	0	0	1	1	0	0	2
ENST00000412298.5|ENSG00000230091.6|OTTHUMG00000018601.2|OTTHUMT00000049027.1|TMEM254-AS1-001|TMEM254-AS1|3121|	ENSMUST00000184083.1|ENSMUSG00000098609.1|OTTMUSG00000044563.1|OTTMUST00000117283.1|Anxa11os-001|Anxa11os|2479|	3121	2479	0.0718916	0.047096	0	0	0	1	0	0	1	0	0	0	0	0	0	0
ENST00000433133.5|ENSG00000236780.5|OTTHUMG00000152856.1|OTTHUMT00000328266.1|AC078941.1-001|AC078941.1|2100|	ENSMUST00000150694.1|ENSMUSG00000085453.1|OTTMUSG00000005202.1|OTTMUST00000011623.1|Gm12018-001|Gm12018|3375|	2100	3375	0.0718479	0.0471923	0	0	0	0	0	1	1	2	0	0	0	1	4	7
ENST00000454784.8|ENSG00000205592.13|OTTHUMG00000060732.34|OTTHUMT00000479140.1|MUC19-001|MUC19|24775|	ENSMUST00000178108.6|ENSMUSG00000044021.14|OTTMUSG00000033381.3|-|Muc19-202|Muc19|2888|	24775	2888	0.0718394	0.047211	0	0	0	0	0	0	0	0	0	0	0	0	0	0
ENST00000496084.1|ENSG00000244545.1|OTTHUMG00000159698.1|OTTHUMT00000356947.1|RP11-788A4.1-001|RP11-788A4.1|487|	ENSMUST00000194030.1|ENSMUSG00000103587.1|OTTMUSG00000051950.1|OTTMUST00000130742.1|Gm38326-001|Gm38326|686|	487	686	0.0718031	0.0472911	0	0	0	0	0	0	0	0	0	0	0	0	0	0
ENST00000409070.5|ENSG00000186235.10|OTTHUMG00000152898.1|OTTHUMT00000328480.1|AC016757.3-006|AC016757.3|730|	ENSMUST00000188956.1|ENSMUSG00000100253.1|OTTMUSG00000045131.1|OTTMUST00000118602.1|1700020N18Rik-001|1700020N18Rik|547|	730	547	0.0717143	0.0474872	0	0	0	0	0	0	0	0	0	0	0	0	0	0
ENST00000609017.1|ENSG00000273387.1|OTTHUMG00000186126.1|OTTHUMT00000472296.1|RP3-412A9.16-001|RP3-412A9.16|1410|	ENSMUST00000131021.1|ENSMUSG00000087111.1|OTTMUSG00000000756.1|OTTMUST00000001444.1|Gm11399-001|Gm11399|324|	1410	324	0.0716521	0.0476252	0	0	2	2	0	0	4	0	0	0	0	0	0	0
ENST00000522627.1|ENSG00000253311.1|OTTHUMG00000163544.1|OTTHUMT00000374082.1|AC011343.1-001|AC011343.1|5607|	ENSMUST00000148504.1|ENSMUSG00000087172.1|OTTMUSG00000005464.1|OTTMUST00000012167.1|Gm12153-001|Gm12153|2509|	5607	2509	0.0715768	0.0477925	0	0	0	0	0	2	2	1	0	0	0	0	4	5
ENST00000499521.2|ENSG00000230551.4|OTTHUMG00000163462.2|OTTHUMT00000470933.1|CTB-89H12.4-002|CTB-89H12.4|8636|	ENSMUST00000184181.1|ENSMUSG00000098702.1|OTTMUSG00000044982.1|OTTMUST00000118206.1|1500015A07Rik-002|1500015A07Rik|1865|	8636	1865	0.0715609	0.047828	6	0	1	0	0	5	12	2	0	0	0	0	2	4
ENST00000586630.1|ENSG00000267417.1|OTTHUMG00000180727.1|OTTHUMT00000452775.1|CTC-239J10.1-001|CTC-239J10.1|523|	ENSMUST00000071067.3|ENSMUSG00000056753.3|OTTMUSG00000061192.1|OTTMUST00000149418.1|C330011M18Rik-001|C330011M18Rik|1849|	523	1849	0.0715033	0.0479565	2	0	1	0	0	0	3	1	0	1	1	0	0	3
ENST00000562846.1|ENSG00000259804.1|OTTHUMG00000172888.1|OTTHUMT00000421178.1|CTD-2012K14.7-001|CTD-2012K14.7|899|	ENSMUST00000182046.1|ENSMUSG00000098120.1|OTTMUSG00000043506.1|OTTMUST00000114099.1|Gm5914-002|Gm5914|332|	899	332	0.0714902	0.0479856	1	0	1	1	0	0	3	0	0	0	0	0	0	0
ENST00000500358.6|ENSG00000246090.6|OTTHUMG00000161232.2|OTTHUMT00000364248.1|RP11-696N14.1-001|RP11-696N14.1|4825|	ENSMUST00000160080.1|ENSMUSG00000089635.1|OTTMUSG00000034746.1|OTTMUST00000088305.1|Gm16559-001|Gm16559|1564|	4825	1564	0.071421	0.0481404	0	0	0	0	0	1	1	0	0	0	0	0	1	1
ENST00000491557.2|ENSG00000237149.5|OTTHUMG00000018528.4|OTTHUMT00000048831.2|ZNF503-AS2-001|ZNF503-AS2|1006|	ENSMUST00000169054.1|ENSMUSG00000090564.8|OTTMUSG00000036774.1|OTTMUST00000094378.1|A430057M04Rik-001|A430057M04Rik|3830|	1006	3830	0.0714119	0.0481607	1	0	3	0	0	0	4	0	0	2	5	0	1	8
ENST00000443490.5|ENSG00000197182.13|OTTHUMG00000150446.2|OTTHUMT00000316787.2|MIRLET7BHG-007|MIRLET7BHG|494|	ENSMUST00000180441.1|ENSMUSG00000097209.1|-|-|AU022754-201|AU022754|2976|	494	2976	0.0713511	0.0482971	0	0	1	1	0	0	2	0	0	2	1	0	0	3
ENST00000602282.2|ENSG00000270006.2|OTTHUMG00000183879.2|OTTHUMT00000467264.2|RP11-178L8.7-001|RP11-178L8.7|401|	ENSMUST00000182551.1|ENSMUSG00000098221.1|OTTMUSG00000043052.1|OTTMUST00000112994.1|Gm27030-001|Gm27030|464|	401	464	0.0711489	0.048753	0	0	1	1	0	0	2	0	0	1	1	0	0	2
ENST00000437964.5|ENSG00000230487.7|OTTHUMG00000151452.3|OTTHUMT00000322710.1|PSMG3-AS1-002|PSMG3-AS1|2666|	ENSMUST00000142625.1|ENSMUSG00000085673.1|OTTMUSG00000030674.1|OTTMUST00000075931.1|Gm16122-001|Gm16122|1158|	2666	1158	0.0710466	0.048985	0	0	4	1	0	0	5	0	0	0	0	0	0	0
ENST00000612522.1|ENSG00000275719.1|OTTHUMG00000186769.1|-|CTB-147N14.6-201|CTB-147N14.6|1225|	ENSMUST00000188725.1|ENSMUSG00000101008.1|OTTMUSG00000048058.1|OTTMUST00000123497.1|Gm29442-001|Gm29442|724|	1225	724	0.0710364	0.0490082	0	0	0	0	0	0	0	0	0	1	1	0	0	2
ENST00000426393.5|ENSG00000230798.5|OTTHUMG00000009138.1|OTTHUMT00000025328.1|FOXD3-AS1-005|FOXD3-AS1|470|	ENSMUST00000136525.1|ENSMUSG00000086096.1|OTTMUSG00000007986.1|OTTMUST00000018098.1|Gm12688-001|Gm12688|701|	470	701	0.0709728	0.0491529	0	0	0	0	0	0	0	0	0	1	0	0	0	1
ENST00000569130.1|ENSG00000260366.1|OTTHUMG00000175774.1|OTTHUMT00000431054.1|CTD-2639E6.4-001|CTD-2639E6.4|274|	ENSMUST00000210866.1|ENSMUSG00000109644.1|OTTMUSG00000030340.4|OTTMUST00000075145.1|AC151602.15-002|AC151602.15|2434|	274	2434	0.0709402	0.0492271	0	0	0	0	0	0	0	0	0	2	2	0	0	4
ENST00000529781.1|ENSG00000255335.1|OTTHUMG00000166357.1|OTTHUMT00000389386.1|RP11-358H18.2-001|RP11-358H18.2|556|	ENSMUST00000211477.1|ENSMUSG00000109962.1|OTTMUSG00000059931.2|OTTMUST00000146819.1|RP23-178G8.4-002|RP23-178G8.4|1623|	556	1623	0.0709346	0.0492399	0	0	1	1	0	0	2	0	0	3	2	0	0	5
ENST00000382528.1|ENSG00000205971.2|OTTHUMG00000151500.1|OTTHUMT00000322900.1|AC074389.6-001|AC074389.6|1423|	ENSMUST00000200614.1|ENSMUSG00000106497.1|OTTMUSG00000054840.1|OTTMUST00000135883.1|Gm43195-001|Gm43195|2332|	1423	2332	0.0708874	0.0493477	0	1	0	3	1	0	5	0	0	0	0	0	1	1
ENST00000602042.1|ENSG00000268218.1|OTTHUMG00000175557.2|OTTHUMT00000430483.2|AC137932.4-001|AC137932.4|3660|	ENSMUST00000162198.1|ENSMUSG00000090174.1|OTTMUSG00000027607.1|OTTMUST00000068333.1|Gm10612-001|Gm10612|1681|	3660	1681	0.0707953	0.0495587	0	0	2	2	0	0	4	0	0	0	0	0	0	0
ENST00000426260.5|ENSG00000230525.5|OTTHUMG00000152853.1|OTTHUMT00000328263.1|AC007403.2-002|AC007403.2|625|	ENSMUST00000143311.1|ENSMUSG00000085675.1|OTTMUSG00000005206.1|OTTMUST00000011627.1|Gm12022-001|Gm12022|1340|	625	1340	0.0707676	0.0496223	0	0	0	0	0	0	0	0	0	0	0	0	0	0
ENST00000424210.1|ENSG00000227543.4|OTTHUMG00000132827.4|OTTHUMT00000256292.2|SPAG5-AS1-002|SPAG5-AS1|1551|	ENSMUST00000147795.1|ENSMUSG00000087295.1|OTTMUSG00000000105.1|OTTMUST00000000359.1|Gm11193-001|Gm11193|421|	1551	421	0.0707268	0.0497161	0	0	0	0	0	0	0	0	0	0	0	0	0	0
ENST00000606665.5|ENSG00000271858.5|OTTHUMG00000185536.1|OTTHUMT00000470673.1|CYB561D2-001|CYB561D2|910|	ENSMUST00000194547.1|ENSMUSG00000102144.1|OTTMUSG00000050930.2|OTTMUST00000129083.2|4930429P21Rik-001|4930429P21Rik|2061|	910	2061	0.0705875	0.0500373	0	0	1	1	0	0	2	0	0	0	1	0	0	1
ENST00000429398.5|ENSG00000231128.5|OTTHUMG00000011939.2|OTTHUMT00000033024.1|RP5-1073O3.2-001|RP5-1073O3.2|773|	ENSMUST00000160110.1|ENSMUSG00000089998.2|OTTMUSG00000033844.1|OTTMUST00000085288.1|Phtf1os-001|Phtf1os|4046|	773	4046	0.0705869	0.0500387	0	0	0	0	0	0	0	0	0	1	1	0	1	3
ENST00000623968.1|ENSG00000280371.1|OTTHUMG00000046224.1|OTTHUMT00000106562.1|RP1-149M18.4-001|RP1-149M18.4|743|	ENSMUST00000143962.1|ENSMUSG00000086930.1|OTTMUSG00000018358.1|OTTMUST00000044348.1|Frs3os-002|Frs3os|574|	743	574	0.0704349	0.0503913	1	0	1	0	0	0	2	0	0	0	0	0	0	0
ENST00000464673.1|ENSG00000243321.3|OTTHUMG00000159740.1|OTTHUMT00000357116.1|RP11-167H9.3-001|RP11-167H9.3|1967|	ENSMUST00000196091.1|ENSMUSG00000105003.1|OTTMUSG00000052571.1|OTTMUST00000131779.1|Gm42512-001|Gm42512|2742|	1967	2742	0.070422	0.0504213	0	0	0	0	0	0	0	0	0	1	1	0	0	2
ENST00000456099.1|ENSG00000233360.4|OTTHUMG00000150662.1|OTTHUMT00000319489.1|Z83844.1-001|Z83844.1|1945|	ENSMUST00000181146.1|ENSMUSG00000097085.1|-|-|Gm26634-201|Gm26634|1511|	1945	1511	0.0703982	0.0504765	0	0	0	1	0	0	1	1	0	1	0	0	1	3
ENST00000597578.1|ENSG00000268388.5|OTTHUMG00000183870.2|OTTHUMT00000467214.1|FENDRR-006|FENDRR|553|	ENSMUST00000182264.1|ENSMUSG00000097336.8|OTTMUSG00000043019.2|OTTMUST00000116970.1|Fendrr-003|Fendrr|2410|	553	2410	0.0703146	0.0506716	0	0	0	1	0	0	1	0	0	2	1	1	0	4
ENST00000379640.1|ENSG00000205325.1|OTTHUMG00000058812.1|OTTHUMT00000130001.1|AC005863.1-001|AC005863.1|2998|	ENSMUST00000130860.1|ENSMUSG00000084884.1|OTTMUSG00000005890.1|OTTMUST00000013111.1|Gm12289-001|Gm12289|2235|	2998	2235	0.0701389	0.0510835	1	0	0	0	0	1	2	0	0	0	0	0	0	0
ENST00000627687.1|ENSG00000280870.2|OTTHUMG00000189737.1|OTTHUMT00000481614.1|MIR325HG-005|MIR325HG|578|	ENSMUST00000150604.7|ENSMUSG00000087620.7|OTTMUSG00000018107.1|OTTMUST00000043699.1|5330434G04Rik-003|5330434G04Rik|1393|	578	1393	0.0700889	0.0512014	0	0	0	0	0	0	0	0	0	0	0	0	0	0
ENST00000569927.1|ENSG00000260641.1|OTTHUMG00000175889.1|OTTHUMT00000431240.1|RP11-1299A16.3-001|RP11-1299A16.3|5647|	ENSMUST00000198292.1|ENSMUSG00000104724.1|OTTMUSG00000052986.1|OTTMUST00000132567.1|Gm43162-001|Gm43162|1770|	5647	1770	0.0700882	0.0512029	0	1	3	0	0	2	6	0	0	1	2	1	0	4
ENST00000519694.1|ENSG00000253187.2|OTTHUMG00000158203.3|OTTHUMT00000350395.1|HOXA10-AS-002|HOXA10-AS|441|	ENSMUST00000125374.7|ENSMUSG00000085412.7|OTTMUSG00000018881.3|OTTMUST00000045413.2|Halr1-001|Halr1|391|	441	391	0.0700795	0.0512234	0	0	1	0	0	0	1	0	0	0	0	0	0	0
ENST00000430912.1|ENSG00000229848.1|OTTHUMG00000156171.1|OTTHUMT00000343246.1|RP13-766D20.2-002|RP13-766D20.2|361|	ENSMUST00000193520.1|ENSMUSG00000102881.1|OTTMUSG00000042857.2|OTTMUST00000112638.2|Gm3807-001|Gm3807|1168|	361	1168	0.0700251	0.0513519	0	0	1	1	0	0	2	0	0	0	1	0	0	1
ENST00000571512.1|ENSG00000262558.1|OTTHUMG00000177418.1|OTTHUMT00000436837.1|RP11-1260E13.3-001|RP11-1260E13.3|913|	ENSMUST00000139361.1|ENSMUSG00000087059.7|OTTMUSG00000006218.1|OTTMUST00000014042.1|Gm12339-002|Gm12339|525|	913	525	0.0700085	0.0513911	0	0	1	1	0	0	2	1	0	0	1	0	0	2
ENST00000624584.1|ENSG00000279900.1|OTTHUMG00000167012.1|OTTHUMT00000392435.1|RP11-113K21.6-001|RP11-113K21.6|452|	ENSMUST00000147198.2|ENSMUSG00000074024.5|OTTMUSG00000022520.2|OTTMUST00000053931.2|4632427E13Rik-001|4632427E13Rik|6559|	452	6559	0.0698836	0.051687	0	0	0	0	0	0	0	1	0	0	0	0	1	2
ENST00000609423.1|ENSG00000272562.1|OTTHUMG00000186458.1|OTTHUMT00000473187.1|RP11-396C23.4-001|RP11-396C23.4|490|	ENSMUST00000097448.2|ENSMUSG00000073485.3|OTTMUSG00000029686.1|-|H3f3aos-201|H3f3aos|2905|	490	2905	0.0698297	0.0518151	0	0	0	0	0	1	1	0	0	1	1	0	1	3
ENST00000587762.1|ENSG00000267519.4|OTTHUMG00000181848.1|OTTHUMT00000457941.1|MIR24-2-001|MIR24-2|1774|	ENSMUST00000180630.1|ENSMUSG00000097296.1|OTTMUSG00000042937.1|OTTMUST00000112758.1|Gm26532-001|Gm26532|690|	1774	690	0.0698129	0.0518551	1	0	0	0	0	0	1	0	0	1	0	0	0	1
ENST00000449063.2|ENSG00000235288.3|OTTHUMG00000156432.2|OTTHUMT00000344173.2|RP11-70C1.3-001|RP11-70C1.3|752|	ENSMUST00000181325.2|ENSMUSG00000097820.2|OTTMUSG00000043332.1|OTTMUST00000113683.1|E530011L22Rik-001|E530011L22Rik|3304|	752	3304	0.0698073	0.0518685	0	0	0	1	0	0	1	1	0	3	3	0	0	7
ENST00000557121.1|ENSG00000259004.1|OTTHUMG00000171672.1|OTTHUMT00000414688.1|RP11-8L8.2-001|RP11-8L8.2|943|	ENSMUST00000143272.7|ENSMUSG00000021268.17|OTTMUSG00000023027.1|OTTMUST00000055472.1|Meg3-004|Meg3|5971|	943	5971	0.0697761	0.051943	0	0	0	0	0	0	0	1	2	3	2	1	1	10
ENST00000418591.1|ENSG00000236295.1|OTTHUMG00000155313.1|OTTHUMT00000339430.1|AC007563.1-001|AC007563.1|3135|	ENSMUST00000194107.1|ENSMUSG00000102266.1|OTTMUSG00000047269.1|OTTMUST00000122213.1|Gm38106-001|Gm38106|2534|	3135	2534	0.0696505	0.0522431	0	0	0	1	0	1	2	0	0	0	0	0	3	3
ENST00000624058.1|ENSG00000278962.1|OTTHUMG00000176143.1|OTTHUMT00000431564.1|RP11-399B17.1-001|RP11-399B17.1|2272|	ENSMUST00000144178.1|ENSMUSG00000085498.1|OTTMUSG00000015408.1|OTTMUST00000036582.1|Gm14023-001|Gm14023|1781|	2272	1781	0.0696147	0.052329	1	0	0	0	0	2	3	0	0	0	0	0	0	0
ENST00000412228.1|ENSG00000231050.1|OTTHUMG00000000941.1|OTTHUMT00000002766.1|RP1-140A9.1-001|RP1-140A9.1|906|	ENSMUST00000197451.1|ENSMUSG00000096221.3|OTTMUSG00000044961.1|-|1500002C15Rik-201|1500002C15Rik|2080|	906	2080	0.0695898	0.0523888	0	0	2	1	0	0	3	0	0	0	0	0	0	0
ENST00000544842.1|ENSG00000256146.1|OTTHUMG00000168646.1|OTTHUMT00000400480.1|RP11-319E16.2-001|RP11-319E16.2|3387|	ENSMUST00000204181.1|ENSMUSG00000107623.1|OTTMUSG00000056718.1|OTTMUST00000139977.1|Gm10415-001|Gm10415|2825|	3387	2825	0.0695697	0.0524371	0	0	0	0	0	1	1	0	0	0	0	0	0	0
ENST00000594299.1|ENSG00000269653.1|OTTHUMG00000182401.1|OTTHUMT00000461015.1|CTB-102L5.7-001|CTB-102L5.7|1890|	ENSMUST00000208431.1|ENSMUSG00000108905.1|OTTMUSG00000059065.1|OTTMUST00000144895.1|Gm44618-001|Gm44618|2262|	1890	2262	0.0695311	0.05253	0	0	3	0	1	0	4	0	0	2	2	0	0	4
ENST00000533576.1|ENSG00000254461.1|OTTHUMG00000166904.1|OTTHUMT00000391822.1|RP11-755F10.3-001|RP11-755F10.3|539|	ENSMUST00000128542.2|ENSMUSG00000086938.8|OTTMUSG00000038069.3|OTTMUST00000098034.2|4930481A15Rik-002|4930481A15Rik|2106|	539	2106	0.0695265	0.052541	0	0	0	1	0	0	1	0	0	1	2	1	0	4
ENST00000514327.5|ENSG00000251170.5|OTTHUMG00000160975.1|OTTHUMT00000363219.1|RP11-729M20.1-001|RP11-729M20.1|567|	ENSMUST00000180764.2|ENSMUSG00000097031.2|OTTMUSG00000054847.1|OTTMUST00000135899.1|Gm26820-001|Gm26820|1008|	567	1008	0.0695194	0.052558	0	0	0	0	0	0	0	0	0	0	0	0	0	0
ENST00000513220.1|ENSG00000249635.1|OTTHUMG00000161211.1|OTTHUMT00000364182.1|RP11-710F7.3-001|RP11-710F7.3|3526|	ENSMUST00000196989.1|ENSMUSG00000105691.1|OTTMUSG00000055269.1|OTTMUST00000136850.1|Gm42876-001|Gm42876|3215|	3526	3215	0.069516	0.0525664	0	0	0	0	1	1	2	1	0	1	0	0	2	4
ENST00000507365.1|ENSG00000251632.1|OTTHUMG00000161349.1|OTTHUMT00000364620.1|RP11-714L20.1-001|RP11-714L20.1|2264|	ENSMUST00000192149.1|ENSMUSG00000102892.1|OTTMUSG00000051518.1|OTTMUST00000130126.1|Gm37854-001|Gm37854|1463|	2264	1463	0.0695067	0.0525887	0	0	0	0	0	0	0	0	0	0	0	0	2	2
ENST00000382313.2|ENSG00000205913.6|OTTHUMG00000177357.1|OTTHUMT00000436407.1|SRRM2-AS1-003|SRRM2-AS1|3523|	ENSMUST00000180975.2|ENSMUSG00000097732.2|OTTMUSG00000049492.1|OTTMUST00000126202.1|D930048G16Rik-001|D930048G16Rik|2266|	3523	2266	0.0694895	0.0526302	0	0	1	2	0	0	3	0	0	0	0	0	0	0
ENST00000611189.1|ENSG00000274627.1|OTTHUMG00000187140.1|OTTHUMT00000474478.1|RP11-104N10.2-001|RP11-104N10.2|5421|	ENSMUST00000186531.1|ENSMUSG00000099881.1|OTTMUSG00000047235.1|OTTMUST00000122144.1|2810013P06Rik-001|2810013P06Rik|2137|	5421	2137	0.0694866	0.0526371	0	1	0	0	0	0	1	0	0	1	1	0	0	2
ENST00000567742.1|ENSG00000261347.1|OTTHUMG00000175569.1|OTTHUMT00000430523.1|AP000439.5-001|AP000439.5|664|	ENSMUST00000208788.1|ENSMUSG00000109305.1|OTTMUSG00000059416.2|OTTMUST00000145845.1|1810010D01Rik-001|1810010D01Rik|889|	664	889	0.0694844	0.0526424	0	0	0	0	0	0	0	0	0	0	1	0	0	1
ENST00000435697.1|ENSG00000215386.11|OTTHUMG00000074377.4|OTTHUMT00000158036.2|MIR99AHG-008|MIR99AHG|716|	ENSMUST00000191736.1|ENSMUSG00000102575.1|OTTMUSG00000043475.1|OTTMUST00000114010.1|Gm37241-001|Gm37241|523|	716	523	0.0694553	0.0527126	1	0	0	0	0	0	1	1	0	0	0	0	1	2
ENST00000415119.1|ENSG00000223966.1|OTTHUMG00000019995.1|OTTHUMT00000052608.1|RP11-141J10.2-001|RP11-141J10.2|337|	ENSMUST00000183473.1|ENSMUSG00000098739.1|OTTMUSG00000044438.1|OTTMUST00000117013.1|Gm27151-002|Gm27151|383|	337	383	0.0694185	0.0528016	0	0	0	0	0	0	0	0	0	0	0	0	0	0
ENST00000436491.1|ENSG00000232086.1|OTTHUMG00000019994.1|OTTHUMT00000052607.1|RP11-141J10.1-001|RP11-141J10.1|337|	ENSMUST00000183473.1|ENSMUSG00000098739.1|OTTMUSG00000044438.1|OTTMUST00000117013.1|Gm27151-002|Gm27151|383|	337	383	0.0694185	0.0528016	0	0	0	0	0	0	0	0	0	0	0	0	0	0
ENST00000455524.1|ENSG00000237371.1|OTTHUMG00000033016.1|OTTHUMT00000080264.1|RP13-152O15.5-001|RP13-152O15.5|188|	ENSMUST00000122831.1|ENSMUSG00000010492.10|OTTMUSG00000030649.1|OTTMUST00000075883.1|Uckl1os-003|Uckl1os|2018|	188	2018	0.0693406	0.0529901	0	0	0	0	0	0	0	0	0	2	0	0	0	2
ENST00000586259.1|ENSG00000267007.1|OTTHUMG00000179990.1|OTTHUMT00000449199.1|CTB-31O20.3-001|CTB-31O20.3|447|	ENSMUST00000181866.1|ENSMUSG00000097889.1|-|-|Gm26541-201|Gm26541|3973|	447	3973	0.0693311	0.0530132	0	0	1	1	0	0	2	0	0	0	0	1	0	1
ENST00000596206.2|ENSG00000268403.2|OTTHUMG00000187446.1|OTTHUMT00000474986.1|CTD-2371O3.3-001|CTD-2371O3.3|1147|	ENSMUST00000098110.2|ENSMUSG00000073867.2|OTTMUSG00000060168.1|OTTMUST00000147273.1|AA474408-001|AA474408|3339|	1147	3339	0.0692882	0.0531173	0	1	0	0	0	0	1	2	0	0	0	0	0	2
ENST00000565573.1|ENSG00000260083.1|OTTHUMG00000176766.2|OTTHUMT00000433632.2|MIR762HG-001|MIR762HG|1125|	ENSMUST00000205992.1|ENSMUSG00000108801.1|OTTMUSG00000058628.1|OTTMUST00000143964.1|Gm44514-001|Gm44514|508|	1125	508	0.069238	0.0532395	0	0	0	1	0	0	1	0	0	0	0	0	0	0
ENST00000509453.1|ENSG00000249145.1|OTTHUMG00000160052.2|OTTHUMT00000359028.2|RP11-774O3.2-001|RP11-774O3.2|492|	ENSMUST00000201742.1|ENSMUSG00000106928.1|OTTMUSG00000056032.1|OTTMUST00000138587.1|Gm43860-001|Gm43860|2705|	492	2705	0.0691864	0.0533651	0	0	1	0	0	0	1	0	0	0	0	0	0	0
ENST00000414512.1|ENSG00000236451.2|OTTHUMG00000153857.1|OTTHUMT00000332710.1|AC067956.1-001|AC067956.1|2062|	ENSMUST00000189132.1|ENSMUSG00000100553.6|OTTMUSG00000047720.1|OTTMUST00000122934.1|Gm17751-002|Gm17751|2004|	2062	2004	0.0690898	0.0536013	0	0	0	0	0	0	0	1	0	0	0	0	2	3
ENST00000612689.1|ENSG00000274425.1|OTTHUMG00000186597.1|OTTHUMT00000473447.1|AC114271.2-001|AC114271.2|2813|	ENSMUST00000192279.1|ENSMUSG00000102340.1|OTTMUSG00000044977.1|OTTMUST00000118199.1|Gm37379-001|Gm37379|2696|	2813	2696	0.0689933	0.0538377	0	0	4	4	1	0	9	0	0	1	1	0	0	2
ENST00000557524.1|ENSG00000258798.1|OTTHUMG00000171100.1|OTTHUMT00000411662.1|RP11-895M11.3-001|RP11-895M11.3|303|	ENSMUST00000180800.1|ENSMUSG00000097121.1|-|-|D130020L05Rik-201|D130020L05Rik|2431|	303	2431	0.0689464	0.053953	0	0	0	0	0	0	0	0	0	3	3	0	0	6
ENST00000560818.1|ENSG00000259203.1|OTTHUMG00000172420.1|OTTHUMT00000418460.1|RP11-209K10.2-001|RP11-209K10.2|572|	ENSMUST00000160950.2|ENSMUSG00000093662.2|OTTMUSG00000040150.2|OTTMUST00000104350.2|Gm20649-001|Gm20649|2740|	572	2740	0.0688896	0.0540931	0	0	0	0	0	1	1	0	0	0	0	0	0	0
ENST00000570344.1|ENSG00000224870.6|OTTHUMG00000002908.4|OTTHUMT00000439300.2|RP4-758J18.2-009|RP4-758J18.2|515|	ENSMUST00000151836.7|ENSMUSG00000087381.8|OTTMUSG00000028969.2|OTTMUST00000071796.2|Gm16008-002|Gm16008|352|	515	352	0.0688757	0.0541274	0	0	1	0	0	0	1	0	0	1	0	0	0	1
ENST00000434244.5|ENSG00000230615.6|OTTHUMG00000008300.5|OTTHUMT00000022875.2|RP5-1198O20.4-001|RP5-1198O20.4|2644|	ENSMUST00000164716.1|ENSMUSG00000091237.1|OTTMUSG00000035322.1|OTTMUST00000090130.1|Gm17114-001|Gm17114|511|	2644	511	0.0688393	0.0542171	0	0	0	1	0	0	1	0	0	1	1	1	0	3
ENST00000617627.1|ENSG00000276308.1|OTTHUMG00000187123.1|OTTHUMT00000474456.1|RP11-116D17.4-001|RP11-116D17.4|1749|	ENSMUST00000201096.1|ENSMUSG00000107364.1|OTTMUSG00000056233.1|OTTMUST00000138976.1|Gm43051-001|Gm43051|2678|	1749	2678	0.0687885	0.0543428	0	0	1	1	0	2	4	0	1	0	1	1	3	6
ENST00000458003.1|ENSG00000229191.1|OTTHUMG00000035785.1|OTTHUMT00000087051.1|RP11-168O16.1-001|RP11-168O16.1|3496|	ENSMUST00000193939.1|ENSMUSG00000102941.1|OTTMUSG00000049847.1|OTTMUST00000126947.1|Gm37552-001|Gm37552|2520|	3496	2520	0.0687663	0.0543978	0	0	1	0	0	0	1	0	0	1	1	0	0	2
ENST00000502790.1|ENSG00000250220.1|OTTHUMG00000160836.1|OTTHUMT00000362542.1|RP11-692D12.1-001|RP11-692D12.1|685|	ENSMUST00000201590.1|ENSMUSG00000106725.1|OTTMUSG00000055500.1|OTTMUST00000137374.1|Gm43363-001|Gm43363|2647|	685	2647	0.0687454	0.0544495	1	0	0	0	0	0	1	2	0	1	0	0	3	6
ENST00000606319.1|ENSG00000225138.7|OTTHUMG00000167373.3|OTTHUMT00000470450.1|CTD-2228K2.7-006|CTD-2228K2.7|477|	ENSMUST00000128914.1|ENSMUSG00000085881.1|OTTMUSG00000027756.1|OTTMUST00000068685.1|Gm15912-001|Gm15912|578|	477	578	0.0687394	0.0544644	0	0	0	1	0	0	1	0	0	0	0	0	0	0
ENST00000570440.1|ENSG00000263013.1|OTTHUMG00000177394.1|OTTHUMT00000436700.1|RP11-876N24.5-001|RP11-876N24.5|1159|	ENSMUST00000126849.1|ENSMUSG00000087384.1|OTTMUSG00000023689.1|OTTMUST00000057849.1|Gm15558-001|Gm15558|2018|	1159	2018	0.0686775	0.0546183	0	0	0	0	0	0	0	0	0	0	0	0	0	0
ENST00000411759.1|ENSG00000229732.1|OTTHUMG00000133684.1|OTTHUMT00000257901.1|AC019349.5-001|AC019349.5|476|	ENSMUST00000153030.1|ENSMUSG00000087265.1|OTTMUSG00000006273.1|OTTMUST00000014189.1|Gm12349-001|Gm12349|657|	476	657	0.0686773	0.0546187	0	0	0	0	0	0	0	0	0	0	0	0	0	0
ENST00000551875.1|ENSG00000257817.1|OTTHUMG00000169584.1|OTTHUMT00000404943.1|RP4-601P9.2-001|RP4-601P9.2|1330|	ENSMUST00000202546.1|ENSMUSG00000106991.1|OTTMUSG00000056209.1|OTTMUST00000138947.1|Gm43399-001|Gm43399|2374|	1330	2374	0.0685752	0.054873	0	0	0	0	0	1	1	1	0	1	0	0	1	3
ENST00000433499.1|ENSG00000237341.1|OTTHUMG00000024133.1|OTTHUMT00000060808.1|SYP-AS1-001|SYP-AS1|542|	ENSMUST00000145894.1|ENSMUSG00000087644.1|OTTMUSG00000017755.1|OTTMUST00000043001.1|Gm14703-001|Gm14703|1820|	542	1820	0.0685481	0.0549407	0	0	0	0	0	0	0	0	0	1	1	1	0	3
ENST00000624366.1|ENSG00000280269.1|OTTHUMG00000168116.1|OTTHUMT00000398259.1|AP000577.2-001|AP000577.2|878|	ENSMUST00000183512.1|ENSMUSG00000099137.1|OTTMUSG00000044655.1|OTTMUST00000117470.1|Gm10603-003|Gm10603|2279|	878	2279	0.0685463	0.0549451	0	0	0	0	1	1	2	2	0	0	0	0	2	4
ENST00000366314.4|ENSG00000179219.5|OTTHUMG00000137643.1|OTTHUMT00000269085.1|LINC00311-001|LINC00311|1566|	ENSMUST00000182423.1|ENSMUSG00000097983.1|OTTMUSG00000043112.1|OTTMUST00000113149.1|Gm26971-001|Gm26971|1072|	1566	1072	0.0684854	0.0550973	0	0	0	1	0	0	1	0	0	1	1	1	0	3
ENST00000415359.1|ENSG00000234132.2|OTTHUMG00000035786.3|OTTHUMT00000087053.2|RP11-168O16.2-001|RP11-168O16.2|508|	ENSMUST00000165464.1|ENSMUSG00000086264.9|OTTMUSG00000026868.2|OTTMUST00000094205.1|Gm15850-004|Gm15850|493|	508	493	0.0684802	0.0551104	0	0	0	1	0	0	1	0	0	0	0	0	0	0
ENST00000635661.1|ENSG00000282897.1|OTTHUMG00000191471.1|OTTHUMT00000487994.1|RP11-168K11.5-001|RP11-168K11.5|2787|	ENSMUST00000143618.1|ENSMUSG00000086139.1|OTTMUSG00000000240.1|OTTMUST00000000692.1|Gm11211-001|Gm11211|359|	2787	359	0.0684609	0.0551587	0	0	1	0	1	0	2	0	0	0	0	0	0	0
ENST00000557682.6|ENSG00000272888.5|OTTHUMG00000149845.9|OTTHUMT00000415064.3|LINC01578-001|LINC01578|2683|	ENSMUST00000205458.1|ENSMUSG00000108319.1|OTTMUSG00000058341.1|OTTMUST00000143273.1|Gm44552-001|Gm44552|1247|	2683	1247	0.0684336	0.0552272	2	2	1	0	0	3	8	0	0	0	0	0	0	0
ENST00000623949.1|ENSG00000279460.1|OTTHUMG00000160553.2|OTTHUMT00000361121.1|RP11-517M22.1-001|RP11-517M22.1|3851|	ENSMUST00000211143.1|ENSMUSG00000110270.1|OTTMUSG00000061285.1|OTTMUST00000149577.1|RP23-296G24.3-001|RP23-296G24.3|678|	3851	678	0.0684151	0.0552738	0	0	0	0	1	1	2	0	0	0	0	0	0	0
ENST00000526448.1|ENSG00000255082.1|OTTHUMG00000167293.1|OTTHUMT00000394043.1|GRM5-AS1-001|GRM5-AS1|4821|	ENSMUST00000181565.1|ENSMUSG00000097423.1|-|-|Gm26522-201|Gm26522|1555|	4821	1555	0.0683781	0.0553665	0	0	1	0	0	0	1	0	0	0	0	0	1	1
ENST00000537157.5|ENSG00000212694.8|OTTHUMG00000128905.2|OTTHUMT00000402173.1|LINC01089-012|LINC01089|479|	ENSMUST00000124914.1|ENSMUSG00000087336.2|OTTMUSG00000026969.2|OTTMUST00000066658.1|Gm15860-001|Gm15860|422|	479	422	0.0682726	0.0556322	0	0	1	1	0	0	2	0	0	0	0	0	0	0
ENST00000624115.1|ENSG00000279708.1|OTTHUMG00000173068.1|OTTHUMT00000422014.1|CTD-2335A18.2-001|CTD-2335A18.2|1537|	ENSMUST00000206829.1|ENSMUSG00000108616.1|OTTMUSG00000058571.1|OTTMUST00000143821.1|Gm35040-001|Gm35040|5094|	1537	5094	0.068153	0.0559348	0	0	3	3	0	0	6	2	1	2	2	0	3	10
ENST00000514840.1|ENSG00000249664.1|OTTHUMG00000162781.1|OTTHUMT00000370383.1|CTD-2227C6.2-001|CTD-2227C6.2|825|	ENSMUST00000193481.1|ENSMUSG00000102756.1|OTTMUSG00000047824.1|OTTMUST00000123080.1|Gm37054-001|Gm37054|543|	825	543	0.068075	0.0561329	0	0	0	0	0	0	0	0	0	0	0	0	0	0
ENST00000470346.2|ENSG00000186235.10|OTTHUMG00000152898.1|OTTHUMT00000328475.1|AC016757.3-001|AC016757.3|1888|	ENSMUST00000171768.1|ENSMUSG00000090322.1|OTTMUSG00000035851.1|OTTMUST00000091856.1|Gm17090-001|Gm17090|490|	1888	490	0.0680209	0.0562705	0	0	1	1	0	1	3	0	0	0	0	0	0	0
ENST00000626200.2|ENSG00000224078.12|OTTHUMG00000056661.10|OTTHUMT00000479997.1|SNHG14-027|SNHG14|2073|	ENSMUST00000185693.6|ENSMUSG00000100826.6|OTTMUSG00000046294.3|OTTMUST00000120726.1|Snhg14-010|Snhg14|734|	2073	734	0.0679522	0.0564458	1	0	0	0	0	1	2	0	0	0	0	0	0	0
ENST00000586845.1|ENSG00000267265.5|OTTHUMG00000180476.1|OTTHUMT00000451465.1|CTC-550B14.7-003|CTC-550B14.7|553|	ENSMUST00000123390.1|ENSMUSG00000085725.2|OTTMUSG00000027088.2|OTTMUST00000066982.1|Gm15873-001|Gm15873|761|	553	761	0.0678026	0.056829	0	0	1	0	0	0	1	0	0	1	1	0	0	2
ENST00000571197.1|ENSG00000262160.1|OTTHUMG00000177997.1|OTTHUMT00000440184.1|RP11-96D1.11-001|RP11-96D1.11|3177|	ENSMUST00000180410.1|ENSMUSG00000097026.1|-|-|Gm26786-201|Gm26786|6243|	3177	6243	0.0677745	0.056901	2	0	0	0	0	2	4	0	0	0	0	0	1	1
ENST00000623234.1|ENSG00000260233.3|OTTHUMG00000166387.2|OTTHUMT00000422504.1|SSSCA1-AS1-002|SSSCA1-AS1|1942|	ENSMUST00000192176.1|ENSMUSG00000102349.1|OTTMUSG00000043053.1|OTTMUST00000112995.1|Gm37376-001|Gm37376|453|	1942	453	0.0677564	0.0569476	1	0	2	1	0	0	4	1	0	0	0	0	1	2
ENST00000587216.5|ENSG00000235050.6|OTTHUMG00000014889.5|OTTHUMT00000458690.2|MLIP-AS1-006|MLIP-AS1|904|	ENSMUST00000184488.1|ENSMUSG00000098370.1|OTTMUSG00000044838.1|OTTMUST00000117833.1|Gm19541-001|Gm19541|2868|	904	2868	0.0677506	0.0569625	0	0	0	0	0	1	1	0	0	0	0	0	1	1
ENST00000553829.1|ENSG00000272888.5|OTTHUMG00000149845.9|OTTHUMT00000415065.1|LINC01578-003|LINC01578|732|	ENSMUST00000184587.3|ENSMUSG00000101970.6|OTTMUSG00000044627.3|OTTMUST00000143285.1|1810026B05Rik-008|1810026B05Rik|5738|	732	5738	0.0677321	0.0570101	0	1	1	0	0	0	2	4	2	1	0	0	5	12
ENST00000376609.1|ENSG00000204584.1|OTTHUMG00000161829.1|OTTHUMT00000366195.1|RP11-304F15.3-001|RP11-304F15.3|2100|	ENSMUST00000189860.1|ENSMUSG00000101258.1|OTTMUSG00000046866.1|OTTMUST00000121534.1|Gm29477-001|Gm29477|499|	2100	499	0.0676402	0.0572471	0	0	0	1	0	2	3	0	0	1	0	0	0	1
ENST00000521028.3|ENSG00000243766.7|OTTHUMG00000063751.7|OTTHUMT00000475157.1|HOTTIP-001|HOTTIP|3345|	ENSMUST00000132559.1|ENSMUSG00000087658.2|OTTMUSG00000018870.3|OTTMUST00000065043.1|Hotairm1-001|Hotairm1|713|	3345	713	0.0676252	0.057286	2	0	3	2	0	0	7	0	0	1	1	0	0	2
ENST00000423433.1|ENSG00000231156.1|OTTHUMG00000152444.1|OTTHUMT00000326243.1|AC093702.1-001|AC093702.1|367|	ENSMUST00000188560.1|ENSMUSG00000099635.1|OTTMUSG00000046941.1|OTTMUST00000121666.1|Gm28528-001|Gm28528|857|	367	857	0.0676184	0.0573033	0	0	0	0	0	0	0	0	0	1	0	0	0	1
ENST00000606008.1|ENSG00000272077.1|OTTHUMG00000185519.1|OTTHUMT00000470638.1|RP11-348P10.2-001|RP11-348P10.2|1953|	ENSMUST00000181107.1|ENSMUSG00000097736.7|-|-|9530059O14Rik-201|9530059O14Rik|3978|	1953	3978	0.067596	0.0573615	1	0	1	1	0	2	5	0	0	2	1	0	1	4
ENST00000610260.1|ENSG00000273369.1|OTTHUMG00000186267.1|OTTHUMT00000472557.1|RP11-700J17.1-001|RP11-700J17.1|441|	ENSMUST00000202838.1|ENSMUSG00000107234.1|OTTMUSG00000055857.1|OTTMUST00000138210.1|Gm43371-001|Gm43371|1031|	441	1031	0.0675789	0.0574056	0	0	0	0	0	0	0	0	0	0	0	0	0	0
ENST00000522213.5|ENSG00000254367.5|OTTHUMG00000163675.1|OTTHUMT00000374722.1|RP11-211C9.1-001|RP11-211C9.1|666|	ENSMUST00000210289.1|ENSMUSG00000109714.1|OTTMUSG00000060449.2|OTTMUST00000147913.1|RP24-348E18.1-001|RP24-348E18.1|961|	666	961	0.0674756	0.0576738	0	0	0	0	0	0	0	0	0	1	0	0	0	1
ENST00000540882.5|ENSG00000256193.5|OTTHUMG00000168425.1|OTTHUMT00000399702.1|LINC00507-003|LINC00507|1935|	ENSMUST00000197355.1|ENSMUSG00000105782.1|OTTMUSG00000055106.1|OTTMUST00000136466.1|Gm42955-001|Gm42955|3393|	1935	3393	0.0673817	0.0579181	1	0	1	0	0	0	2	0	0	0	0	0	3	3
ENST00000418029.2|ENSG00000223901.2|OTTHUMG00000090629.2|OTTHUMT00000207253.2|AP001469.5-001|AP001469.5|788|	ENSMUST00000127576.2|ENSMUSG00000086241.2|OTTMUSG00000027873.1|OTTMUST00000069016.1|4930483K19Rik-001|4930483K19Rik|1237|	788	1237	0.0673505	0.0579996	0	0	0	0	0	0	0	0	0	0	1	0	0	1
ENST00000586297.1|ENSG00000267633.1|OTTHUMG00000180913.1|OTTHUMT00000453619.1|CTB-5E10.3-003|CTB-5E10.3|428|	ENSMUST00000193908.1|ENSMUSG00000103593.1|OTTMUSG00000042936.1|OTTMUST00000112757.1|Gm37352-001|Gm37352|2181|	428	2181	0.0673062	0.0581154	0	0	0	0	0	0	0	0	0	0	1	0	0	1
ENST00000592718.1|ENSG00000267719.1|OTTHUMG00000177461.2|OTTHUMT00000437037.2|HP09025-001|HP09025|4237|	ENSMUST00000181119.1|ENSMUSG00000097294.1|-|-|Gm26888-201|Gm26888|3683|	4237	3683	0.0672711	0.0582073	0	0	2	3	0	0	5	0	0	1	1	0	0	2
ENST00000609303.1|ENSG00000272593.1|OTTHUMG00000185896.1|OTTHUMT00000471661.1|RP11-339B21.11-001|RP11-339B21.11|556|	ENSMUST00000131207.1|ENSMUSG00000075416.5|OTTMUSG00000016805.1|OTTMUST00000040802.1|Gm14488-002|Gm14488|2941|	556	2941	0.067262	0.058231	0	0	2	1	0	0	3	1	0	1	1	2	0	5
ENST00000590053.1|ENSG00000267489.3|OTTHUMG00000180233.3|OTTHUMT00000450344.2|CTC-360P9.4-001|CTC-360P9.4|647|	ENSMUST00000187488.1|ENSMUSG00000100387.1|OTTMUSG00000049731.1|OTTMUST00000126681.1|Gm28514-001|Gm28514|450|	647	450	0.0672549	0.0582495	0	0	0	0	0	0	0	0	0	0	0	0	0	0
ENST00000614618.1|ENSG00000278698.1|OTTHUMG00000187283.1|OTTHUMT00000474696.1|RP11-282A11.3-001|RP11-282A11.3|657|	ENSMUST00000208097.1|ENSMUSG00000108912.1|OTTMUSG00000059825.1|OTTMUST00000146606.1|E230020D15Rik-001|E230020D15Rik|5899|	657	5899	0.0670897	0.058684	1	0	0	0	0	0	1	0	0	0	0	1	1	2
ENST00000583156.1|ENSG00000263717.1|OTTHUMG00000179639.1|OTTHUMT00000447476.1|RP11-466A19.6-001|RP11-466A19.6|420|	ENSMUST00000140556.1|ENSMUSG00000086507.1|OTTMUSG00000000217.1|OTTMUST00000000640.1|Adap2os-001|Adap2os|984|	420	984	0.0670107	0.0588925	0	0	1	1	0	0	2	0	0	0	0	0	0	0
ENST00000569378.1|ENSG00000260063.1|OTTHUMG00000175777.1|OTTHUMT00000431059.1|RP5-968P14.2-001|RP5-968P14.2|2000|	ENSMUST00000137962.1|ENSMUSG00000087288.1|OTTMUSG00000010219.1|OTTMUST00000023749.1|Gm13061-001|Gm13061|664|	2000	664	0.0669881	0.0589521	1	0	1	1	0	0	3	1	0	1	0	0	0	2
ENST00000525673.1|ENSG00000254753.1|OTTHUMG00000165488.1|OTTHUMT00000384428.1|RP11-480O10.1-001|RP11-480O10.1|589|	ENSMUST00000209814.1|ENSMUSG00000110242.1|OTTMUSG00000061067.1|OTTMUST00000149194.1|RP24-229D22.1-001|RP24-229D22.1|1795|	589	1795	0.0669684	0.0590044	0	0	0	0	0	0	0	1	0	0	0	0	2	3
ENST00000585596.5|ENSG00000248015.6|OTTHUMG00000168079.3|OTTHUMT00000449738.1|AC005329.7-002|AC005329.7|571|	ENSMUST00000135434.1|ENSMUSG00000087672.1|OTTMUSG00000019109.1|OTTMUST00000045756.1|Gm15122-001|Gm15122|462|	571	462	0.0669445	0.0590678	0	0	1	1	0	0	2	0	0	1	1	0	0	2
ENST00000607362.1|ENSG00000271858.5|OTTHUMG00000185536.1|OTTHUMT00000470676.1|CYB561D2-003|CYB561D2|459|	ENSMUST00000164032.1|ENSMUSG00000091425.1|OTTMUSG00000036847.1|OTTMUST00000094621.1|Gm17118-001|Gm17118|335|	459	335	0.066742	0.0596064	0	0	0	1	0	0	1	0	0	0	0	0	0	0
ENST00000584382.1|ENSG00000266371.1|OTTHUMG00000179255.1|OTTHUMT00000445477.1|RP11-142O6.1-001|RP11-142O6.1|2780|	ENSMUST00000181152.1|ENSMUSG00000097335.1|-|-|Gm26563-202|Gm26563|1931|	2780	1931	0.0667134	0.0596828	3	0	0	0	1	5	9	0	0	0	0	0	0	0
ENST00000456337.1|ENSG00000224730.1|OTTHUMG00000149999.2|OTTHUMT00000315570.2|AC009892.10-001|AC009892.10|554|	ENSMUST00000171665.1|ENSMUSG00000091177.2|OTTMUSG00000035450.2|OTTMUST00000090704.1|Gm15494-001|Gm15494|451|	554	451	0.0667029	0.059711	0	0	0	0	0	0	0	0	0	0	0	0	0	0
ENST00000542466.2|ENSG00000255737.2|OTTHUMG00000170286.1|OTTHUMT00000408368.1|AGAP2-AS1-001|AGAP2-AS1|1500|	ENSMUST00000174167.1|ENSMUSG00000092384.7|OTTMUSG00000038137.1|OTTMUST00000098225.1|Gm4189-001|Gm4189|367|	1500	367	0.0665019	0.0602503	0	0	3	2	0	0	5	0	0	1	0	0	0	1
ENST00000480237.1|ENSG00000196668.3|OTTHUMG00000157726.1|OTTHUMT00000349521.1|LINC00173-002|LINC00173|1597|	ENSMUST00000202755.1|ENSMUSG00000107058.1|OTTMUSG00000056148.1|OTTMUST00000138835.1|Gm42545-001|Gm42545|922|	1597	922	0.0664783	0.0603139	0	0	2	1	0	1	4	0	0	2	1	0	0	3
ENST00000561777.1|ENSG00000261043.4|OTTHUMG00000172896.1|OTTHUMT00000421198.1|MIR4313-001|MIR4313|2905|	ENSMUST00000181927.1|ENSMUSG00000097870.1|-|-|Gm26868-201|Gm26868|2653|	2905	2653	0.066469	0.060339	0	0	0	0	0	0	0	0	0	0	0	0	0	0
ENST00000477848.5|ENSG00000228812.7|OTTHUMG00000032911.3|OTTHUMT00000349803.1|LAMA5-AS1-002|LAMA5-AS1|563|	ENSMUST00000069943.3|ENSMUSG00000056061.3|OTTMUSG00000016300.1|OTTMUST00000039169.1|Gata5os-001|Gata5os|1678|	563	1678	0.0664418	0.0604124	0	0	1	1	0	0	2	0	0	1	0	1	0	2
ENST00000428541.1|ENSG00000222043.2|OTTHUMG00000154178.1|OTTHUMT00000334259.1|AC079305.10-001|AC079305.10|499|	ENSMUST00000135244.1|ENSMUSG00000087222.1|OTTMUSG00000013243.1|OTTMUST00000032002.1|E030042O20Rik-001|E030042O20Rik|1427|	499	1427	0.0664328	0.0604368	0	0	1	1	0	0	2	0	0	1	1	0	0	2
ENST00000561934.1|ENSG00000261823.1|OTTHUMG00000176402.1|OTTHUMT00000431909.1|RP11-48G14.1-001|RP11-48G14.1|839|	ENSMUST00000184355.1|ENSMUSG00000098959.1|OTTMUSG00000044712.3|OTTMUST00000117797.1|Gm27230-004|Gm27230|285|	839	285	0.0664199	0.0604716	0	0	0	0	0	0	0	0	0	0	0	0	0	0
ENST00000570335.1|ENSG00000262833.1|OTTHUMG00000177623.1|OTTHUMT00000438132.1|RP11-28G8.1-001|RP11-28G8.1|3204|	ENSMUST00000129379.1|ENSMUSG00000085207.1|OTTMUSG00000004051.1|OTTMUST00000009028.1|Gm11767-001|Gm11767|493|	3204	493	0.0664129	0.0604905	0	0	1	0	0	0	1	0	0	0	0	0	0	0
ENST00000634796.1|ENSG00000283073.1|OTTHUMG00000191576.1|OTTHUMT00000488607.1|RP11-834C11.15-001|RP11-834C11.15|1734|	ENSMUST00000186379.1|ENSMUSG00000099758.1|OTTMUSG00000048331.1|OTTMUST00000123961.1|Gm10830-001|Gm10830|636|	1734	636	0.0663899	0.0605526	1	0	2	1	0	0	4	0	0	2	0	0	0	2
ENST00000456163.1|ENSG00000223874.1|OTTHUMG00000155310.1|OTTHUMT00000339424.1|AC007557.1-001|AC007557.1|393|	ENSMUST00000190525.1|ENSMUSG00000101968.6|OTTMUSG00000045166.1|OTTMUST00000118687.1|1700027A15Rik-002|1700027A15Rik|432|	393	432	0.0663865	0.060562	0	0	0	0	0	0	0	0	0	0	0	0	0	0
ENST00000573130.2|ENSG00000261971.6|OTTHUMG00000177474.2|OTTHUMT00000437108.2|MMP25-AS1-003|MMP25-AS1|4434|	ENSMUST00000180920.1|ENSMUSG00000097517.1|-|-|Gm26695-201|Gm26695|1251|	4434	1251	0.0663488	0.0606639	0	0	6	3	2	2	13	0	0	1	1	0	0	2
ENST00000626538.1|ENSG00000281406.1|OTTHUMG00000189561.1|OTTHUMT00000479967.1|BLACAT1-001|BLACAT1|2994|	ENSMUST00000189288.1|ENSMUSG00000100658.1|OTTMUSG00000049387.1|OTTMUST00000125890.1|F730311O21Rik-001|F730311O21Rik|5447|	2994	5447	0.0663202	0.0607414	0	0	2	0	1	1	4	0	0	1	0	0	0	1
ENST00000535351.1|ENSG00000251002.7|OTTHUMG00000168895.3|OTTHUMT00000401534.1|AE000661.37-002|AE000661.37|571|	ENSMUST00000197337.1|ENSMUSG00000105418.1|OTTMUSG00000053858.1|OTTMUST00000134020.1|Gm43650-001|Gm43650|1382|	571	1382	0.0662395	0.0609607	0	0	0	0	0	0	0	0	0	0	0	0	0	0
ENST00000522388.1|ENSG00000253389.2|OTTHUMG00000164084.2|OTTHUMT00000377178.1|RP11-930P14.1-001|RP11-930P14.1|1088|	ENSMUST00000141930.1|ENSMUSG00000086741.1|OTTMUSG00000026380.1|OTTMUST00000065233.1|Gm15816-001|Gm15816|1688|	1088	1688	0.0662223	0.0610074	1	0	0	1	0	1	3	0	0	0	0	0	0	0
ENST00000414926.1|ENSG00000230684.1|OTTHUMG00000020797.1|OTTHUMT00000054626.1|RP11-409K20.6-001|RP11-409K20.6|266|	ENSMUST00000135700.1|ENSMUSG00000085491.1|OTTMUSG00000011875.1|OTTMUST00000027981.1|4930527E20Rik-001|4930527E20Rik|351|	266	351	0.0662212	0.0610104	0	0	0	0	0	0	0	0	0	1	0	0	0	1
ENST00000610158.1|ENSG00000273107.1|OTTHUMG00000186186.1|OTTHUMT00000472387.1|RP11-165A20.3-001|RP11-165A20.3|273|	ENSMUST00000126967.1|ENSMUSG00000075514.4|OTTMUSG00000011664.1|OTTMUST00000027307.1|Gm13375-001|Gm13375|854|	273	854	0.0661224	0.0612798	0	0	1	0	0	0	1	0	0	2	2	1	0	5
ENST00000569966.1|ENSG00000261706.1|OTTHUMG00000172755.1|OTTHUMT00000420370.1|LINC00165-001|LINC00165|824|	ENSMUST00000180790.1|ENSMUSG00000097811.1|-|-|2810425M01Rik-201|2810425M01Rik|1850|	824	1850	0.0661196	0.0612872	0	0	0	1	0	0	1	0	0	1	1	0	0	2
ENST00000415359.1|ENSG00000234132.2|OTTHUMG00000035786.3|OTTHUMT00000087053.2|RP11-168O16.2-001|RP11-168O16.2|508|	ENSMUST00000194155.1|ENSMUSG00000102717.1|OTTMUSG00000049844.1|OTTMUST00000126942.1|Gm37759-001|Gm37759|3246|	508	3246	0.0661062	0.0613239	0	0	0	1	0	0	1	0	0	1	4	0	0	5
ENST00000586169.1|ENSG00000266903.1|OTTHUMG00000180497.2|OTTHUMT00000451615.2|CTB-171A8.1-001|CTB-171A8.1|379|	ENSMUST00000137373.1|ENSMUSG00000087593.1|OTTMUSG00000031376.1|OTTMUST00000077745.1|Gm16174-001|Gm16174|402|	379	402	0.0660873	0.0613756	0	0	0	1	0	0	1	0	0	1	0	0	0	1
ENST00000624349.1|ENSG00000279908.1|OTTHUMG00000173424.1|OTTHUMT00000423050.1|RP11-325I22.3-001|RP11-325I22.3|3251|	ENSMUST00000022049.3|ENSMUSG00000021566.6|OTTMUSG00000033254.2|OTTMUST00000083368.2|Slc6a19os-001|Slc6a19os|1529|	3251	1529	0.0660817	0.0613909	0	0	2	2	0	0	4	0	0	0	0	0	0	0
ENST00000504876.2|ENSG00000152931.7|OTTHUMG00000162213.3|OTTHUMT00000368803.2|PART1-003|PART1|5616|	ENSMUST00000164299.1|ENSMUSG00000090358.1|OTTMUSG00000036631.1|OTTMUST00000093888.1|Gm2822-001|Gm2822|2910|	5616	2910	0.0660066	0.0615966	0	0	1	1	1	2	5	1	0	1	0	0	1	3
ENST00000455578.5|ENSG00000172250.14|OTTHUMG00000150888.3|OTTHUMT00000320445.2|SERHL-002|SERHL|1712|	ENSMUST00000186291.1|ENSMUSG00000100199.1|OTTMUSG00000048087.1|OTTMUST00000123550.1|Gm20324-001|Gm20324|1118|	1712	1118	0.0659918	0.0616372	0	0	1	2	0	0	3	0	0	1	1	0	0	2
ENST00000563631.1|ENSG00000261646.1|OTTHUMG00000176321.1|OTTHUMT00000431759.1|RP11-489G11.3-001|RP11-489G11.3|2209|	ENSMUST00000180690.1|ENSMUSG00000096917.2|OTTMUSG00000060716.1|OTTMUST00000148435.1|2500002B13Rik-001|2500002B13Rik|2618|	2209	2618	0.0659645	0.0617123	1	0	0	0	0	0	1	1	0	0	0	0	2	3
ENST00000634373.1|ENSG00000283095.1|OTTHUMG00000191605.1|OTTHUMT00000488824.1|ABC11-4932300O16.1-001|ABC11-4932300O16.1|1535|	ENSMUST00000211166.1|ENSMUSG00000109802.1|OTTMUSG00000060340.1|OTTMUST00000147659.1|RP23-246L24.2-001|RP23-246L24.2|845|	1535	845	0.0659607	0.0617227	0	0	0	0	0	0	0	0	0	0	0	0	0	0
ENST00000637674.1|ENSG00000283183.1|OTTHUMG00000191712.1|OTTHUMT00000489674.1|RP11-1263C18.2-001|RP11-1263C18.2|1854|	ENSMUST00000197854.1|ENSMUSG00000072769.6|OTTMUSG00000053972.1|OTTMUST00000134190.1|Gm10419-005|Gm10419|653|	1854	653	0.0659448	0.0617662	1	0	1	0	0	1	3	0	0	2	1	0	0	3
ENST00000623634.1|ENSG00000280038.1|OTTHUMG00000172494.1|OTTHUMT00000418798.1|DNM1P41-001|DNM1P41|3350|	ENSMUST00000207526.1|ENSMUSG00000109194.1|OTTMUSG00000059183.1|OTTMUST00000145224.1|Gm44570-001|Gm44570|3698|	3350	3698	0.0658995	0.061891	1	0	1	3	0	0	5	0	0	1	0	0	0	1
ENST00000583141.1|ENSG00000263394.1|OTTHUMG00000178392.2|OTTHUMT00000441785.2|RP11-160E2.19-001|RP11-160E2.19|757|	ENSMUST00000123423.1|ENSMUSG00000085762.1|OTTMUSG00000005864.1|OTTMUST00000013052.1|Lrrc75aos2-002|Lrrc75aos2|446|	757	446	0.0657737	0.062238	0	0	1	0	0	0	1	0	0	0	0	0	0	0
ENST00000607850.1|ENSG00000254363.6|OTTHUMG00000163536.2|OTTHUMT00000373272.2|CTB-131B5.5-002|CTB-131B5.5|5951|	ENSMUST00000209540.1|ENSMUSG00000109836.1|OTTMUSG00000060489.1|OTTMUST00000147983.1|RP24-464B16.1-001|RP24-464B16.1|3416|	5951	3416	0.0657427	0.0623238	0	0	0	1	0	3	4	2	0	0	0	0	4	6
ENST00000419511.1|ENSG00000228135.1|OTTHUMG00000154664.1|OTTHUMT00000336513.1|LINC01494-001|LINC01494|1011|	ENSMUST00000185727.1|ENSMUSG00000099519.1|OTTMUSG00000048529.1|OTTMUST00000124354.1|Gm29253-001|Gm29253|5231|	1011	5231	0.0657306	0.0623573	1	0	0	0	0	0	1	0	0	2	2	0	0	4
ENST00000608823.1|ENSG00000272832.1|OTTHUMG00000185977.1|OTTHUMT00000471900.1|RP11-91K8.5-001|RP11-91K8.5|403|	ENSMUST00000145185.1|ENSMUSG00000086236.7|OTTMUSG00000032746.3|OTTMUST00000081490.2|5830418P13Rik-002|5830418P13Rik|548|	403	548	0.06565	0.0625811	0	0	0	0	0	0	0	0	0	0	0	0	0	0
ENST00000596207.2|ENSG00000267857.2|OTTHUMG00000187465.1|OTTHUMT00000475038.1|RP5-1023B21.1-001|RP5-1023B21.1|608|	ENSMUST00000180790.1|ENSMUSG00000097811.1|-|-|2810425M01Rik-201|2810425M01Rik|1850|	608	1850	0.0656103	0.0626913	0	0	1	1	0	0	2	0	0	1	1	0	0	2
ENST00000618835.1|ENSG00000278600.1|OTTHUMG00000176726.2|OTTHUMT00000433312.2|RP11-81A1.6-001|RP11-81A1.6|2261|	ENSMUST00000194342.1|ENSMUSG00000103581.1|OTTMUSG00000046281.1|OTTMUST00000120665.1|Gm37833-001|Gm37833|3256|	2261	3256	0.0655509	0.0628567	1	0	0	0	0	1	2	0	0	0	0	0	2	2
ENST00000624282.1|ENSG00000279801.1|OTTHUMG00000177715.1|OTTHUMT00000438621.1|RP11-75C10.6-001|RP11-75C10.6|2464|	ENSMUST00000182811.1|ENSMUSG00000086859.3|OTTMUSG00000003780.5|OTTMUST00000116901.1|Snhg20-006|Snhg20|2153|	2464	2153	0.0655458	0.062871	0	0	0	0	0	0	0	1	1	2	0	0	0	4
ENST00000558691.1|ENSG00000259666.2|OTTHUMG00000172626.2|OTTHUMT00000419532.1|LINGO1-AS1-001|LINGO1-AS1|1720|	ENSMUST00000181927.1|ENSMUSG00000097870.1|-|-|Gm26868-201|Gm26868|2653|	1720	2653	0.0655203	0.0629422	0	0	0	1	0	0	1	0	0	0	0	0	0	0
ENST00000597495.1|ENSG00000237126.8|OTTHUMG00000153318.5|OTTHUMT00000462029.2|AC073254.1-010|AC073254.1|635|	ENSMUST00000138844.2|ENSMUSG00000089821.1|OTTMUSG00000029544.2|OTTMUST00000073233.2|Efhd1os-001|Efhd1os|332|	635	332	0.0654109	0.0632481	0	0	0	0	0	0	0	0	0	0	0	0	0	0
ENST00000556411.1|ENSG00000258620.1|OTTHUMG00000171586.1|OTTHUMT00000414321.1|RP11-362L22.1-001|RP11-362L22.1|441|	ENSMUST00000189236.1|ENSMUSG00000101767.1|OTTMUSG00000047122.1|OTTMUST00000121939.1|Gm28498-001|Gm28498|469|	441	469	0.0653845	0.0633221	0	0	0	0	0	0	0	0	0	1	0	0	0	1
ENST00000415386.2|ENSG00000233421.4|OTTHUMG00000002488.1|OTTHUMT00000007045.1|RP5-875O13.1-001|RP5-875O13.1|1548|	ENSMUST00000181450.1|ENSMUSG00000097620.7|OTTMUSG00000047125.1|-|4921514A10Rik-201|4921514A10Rik|2114|	1548	2114	0.0653022	0.0635532	1	0	2	2	0	1	6	0	0	0	0	0	0	0
ENST00000622942.1|ENSG00000280064.1|OTTHUMG00000164037.1|OTTHUMT00000376898.1|RP11-205M5.3-001|RP11-205M5.3|2385|	ENSMUST00000209486.1|ENSMUSG00000110120.1|OTTMUSG00000060912.1|OTTMUST00000148888.1|RP23-60P23.7-001|RP23-60P23.7|1465|	2385	1465	0.065215	0.0637989	0	0	0	1	0	0	1	1	0	1	0	0	0	2
ENST00000580511.5|ENSG00000203808.10|OTTHUMG00000015292.2|OTTHUMT00000444424.1|BVES-AS1-003|BVES-AS1|853|	ENSMUST00000162062.1|ENSMUSG00000090088.1|OTTMUSG00000027972.1|OTTMUST00000069292.1|Gm15934-001|Gm15934|525|	853	525	0.0651916	0.063865	1	0	1	1	0	0	3	0	0	0	0	0	0	0
ENST00000441184.1|ENSG00000225174.1|OTTHUMG00000015320.2|OTTHUMT00000041713.2|OSTM1-AS1-001|OSTM1-AS1|3334|	ENSMUST00000181674.1|ENSMUSG00000097008.1|-|-|Gm26860-201|Gm26860|1489|	3334	1489	0.065185	0.0638836	1	0	3	3	1	0	8	0	0	1	1	0	0	2
ENST00000526174.1|ENSG00000254721.1|OTTHUMG00000167265.1|OTTHUMT00000393903.1|RP11-805J14.5-001|RP11-805J14.5|976|	ENSMUST00000208181.1|ENSMUSG00000109009.1|OTTMUSG00000059884.1|OTTMUST00000146732.1|Gm44929-002|Gm44929|1337|	976	1337	0.0651647	0.0639412	0	0	0	0	0	0	0	0	0	0	0	0	0	0
ENST00000609151.1|ENSG00000273014.1|OTTHUMG00000186213.2|OTTHUMT00000472426.2|RP11-225B17.2-001|RP11-225B17.2|472|	ENSMUST00000203397.1|ENSMUSG00000108080.1|OTTMUSG00000024639.1|OTTMUST00000060567.1|Gm10209-001|Gm10209|1607|	472	1607	0.0651182	0.0640725	0	0	0	0	0	0	0	0	0	1	1	0	0	2
ENST00000567415.1|ENSG00000261229.6|OTTHUMG00000176724.1|OTTHUMT00000433308.1|RP11-38G5.4-001|RP11-38G5.4|758|	ENSMUST00000194342.1|ENSMUSG00000103581.1|OTTMUSG00000046281.1|OTTMUST00000120665.1|Gm37833-001|Gm37833|3256|	758	3256	0.0650994	0.0641258	0	0	0	0	0	1	1	0	0	0	0	0	2	2
ENST00000428289.1|ENSG00000233030.2|OTTHUMG00000012090.1|OTTHUMT00000033450.1|RP11-196G18.3-001|RP11-196G18.3|3543|	ENSMUST00000176760.1|ENSMUSG00000093577.1|OTTMUSG00000042077.1|OTTMUST00000110349.1|Gm20632-001|Gm20632|2427|	3543	2427	0.0650912	0.0641492	1	0	0	0	0	0	1	1	0	1	1	0	0	3
ENST00000588701.1|ENSG00000266998.1|OTTHUMG00000177710.1|OTTHUMT00000438616.1|RP11-936I5.1-001|RP11-936I5.1|3419|	ENSMUST00000123882.1|ENSMUSG00000086050.1|OTTMUSG00000029404.1|OTTMUST00000072873.1|Gm16045-001|Gm16045|2969|	3419	2969	0.0650824	0.064174	0	0	3	4	1	0	8	0	0	1	1	0	0	2
ENST00000586064.3|ENSG00000267629.3|OTTHUMG00000182219.3|OTTHUMT00000460115.3|AC138430.4-001|AC138430.4|5409|	ENSMUST00000188626.1|ENSMUSG00000101854.1|OTTMUSG00000045165.1|OTTMUST00000118682.1|1700026F02Rik-001|1700026F02Rik|483|	5409	483	0.0650812	0.0641776	2	2	8	3	1	0	16	0	0	0	0	0	0	0
ENST00000624624.1|ENSG00000279117.1|OTTHUMG00000165443.1|OTTHUMT00000384091.1|CTD-2562J17.6-001|CTD-2562J17.6|2338|	ENSMUST00000184420.1|ENSMUSG00000099137.1|OTTMUSG00000044655.1|OTTMUST00000117471.1|Gm10603-001|Gm10603|4520|	2338	4520	0.0650778	0.064187	0	0	2	1	0	1	4	1	0	1	1	1	3	7
ENST00000506892.1|ENSG00000251387.1|OTTHUMG00000163334.1|OTTHUMT00000372776.1|CTB-35F21.3-001|CTB-35F21.3|553|	ENSMUST00000188160.1|ENSMUSG00000100320.1|OTTMUSG00000047844.1|OTTMUST00000123106.1|Gm29417-001|Gm29417|571|	553	571	0.0650478	0.0642723	0	0	0	0	0	0	0	0	0	1	2	0	0	3
ENST00000453322.1|ENSG00000228528.1|OTTHUMG00000153054.1|OTTHUMT00000329249.1|AC068057.1-001|AC068057.1|709|	ENSMUST00000191992.1|ENSMUSG00000103106.1|OTTMUSG00000047475.1|OTTMUST00000122537.1|Gm37047-001|Gm37047|533|	709	533	0.0649716	0.0644889	1	0	0	0	0	0	1	0	0	1	1	0	0	2
ENST00000525575.1|ENSG00000255021.1|OTTHUMG00000167094.1|OTTHUMT00000393080.1|RP11-536I6.2-001|RP11-536I6.2|613|	ENSMUST00000205549.1|ENSMUSG00000108574.1|OTTMUSG00000058003.1|OTTMUST00000142354.1|Gm44981-001|Gm44981|1943|	613	1943	0.0649424	0.0645719	0	0	1	0	1	0	2	0	0	1	0	1	0	2
ENST00000607520.1|ENSG00000252690.3|OTTHUMG00000172405.1|OTTHUMT00000418411.1|SCARNA15-001|SCARNA15|4325|	ENSMUST00000180385.1|ENSMUSG00000097277.7|OTTMUSG00000042939.1|OTTMUST00000112761.1|2900076A07Rik-004|2900076A07Rik|914|	4325	914	0.0649409	0.0645761	1	0	0	0	0	3	4	0	0	0	0	0	0	0
ENST00000439898.1|ENSG00000230454.1|OTTHUMG00000156937.1|OTTHUMT00000346668.1|U73166.2-001|U73166.2|2625|	ENSMUST00000181099.1|ENSMUSG00000097099.2|OTTMUSG00000050868.2|OTTMUST00000128891.1|Gm9917-003|Gm9917|1499|	2625	1499	0.0649409	0.0645763	0	0	2	3	0	0	5	1	0	0	1	0	0	2
ENST00000561544.1|ENSG00000261532.1|OTTHUMG00000177046.1|OTTHUMT00000435094.1|RP11-304L19.8-001|RP11-304L19.8|580|	ENSMUST00000181760.7|ENSMUSG00000073437.10|OTTMUSG00000042676.1|OTTMUST00000112386.1|D330041H03Rik-001|D330041H03Rik|1362|	580	1362	0.0649194	0.0646376	0	0	1	2	0	0	3	0	0	0	0	0	0	0
ENST00000447639.1|ENSG00000239322.1|OTTHUMG00000153727.2|OTTHUMT00000332241.2|ATP6V1B1-AS1-002|ATP6V1B1-AS1|943|	ENSMUST00000137673.2|ENSMUSG00000087001.2|OTTMUSG00000022530.2|OTTMUST00000053960.2|Gm15475-001|Gm15475|3757|	943	3757	0.0649168	0.0646449	0	0	0	1	1	1	3	0	0	1	2	1	0	4
ENST00000535913.2|ENSG00000204044.6|OTTHUMG00000032629.3|OTTHUMT00000471537.2|RP11-465L10.10-002|RP11-465L10.10|1957|	ENSMUST00000127942.1|ENSMUSG00000086820.1|OTTMUSG00000001127.1|OTTMUST00000002212.1|Gm11465-001|Gm11465|435|	1957	435	0.0648983	0.0646979	1	0	3	3	1	0	8	0	0	0	0	0	0	0
ENST00000506463.1|ENSG00000249740.2|OTTHUMG00000162040.2|OTTHUMT00000366995.1|OSMR-AS1-004|OSMR-AS1|800|	ENSMUST00000192751.1|ENSMUSG00000104334.1|OTTMUSG00000047328.1|OTTMUST00000122333.1|Gm38282-001|Gm38282|695|	800	695	0.0648545	0.0648229	0	0	0	0	0	0	0	0	0	0	0	0	0	0
ENST00000609118.1|ENSG00000273010.1|OTTHUMG00000186361.1|OTTHUMT00000473002.1|RP11-96K19.5-001|RP11-96K19.5|1348|	ENSMUST00000164330.1|ENSMUSG00000091575.2|OTTMUSG00000045941.1|-|2010016I18Rik-201|2010016I18Rik|1425|	1348	1425	0.064849	0.0648387	0	0	1	1	0	1	3	1	0	2	1	0	0	4
ENST00000610297.1|ENSG00000277147.4|OTTHUMG00000182426.4|OTTHUMT00000038351.3|LINC00869-015|LINC00869|554|	ENSMUST00000197696.1|ENSMUSG00000104766.1|OTTMUSG00000053189.1|OTTMUST00000132916.1|Gm43734-001|Gm43734|906|	554	906	0.0647651	0.0650789	0	0	0	1	0	0	1	0	0	0	0	0	0	0
ENST00000411904.1|ENSG00000228401.4|OTTHUMG00000020937.1|OTTHUMT00000055093.1|HSPC324-001|HSPC324|557|	ENSMUST00000181730.1|ENSMUSG00000097872.1|-|-|Gm26702-201|Gm26702|4570|	557	4570	0.064743	0.0651423	0	0	0	0	0	0	0	1	1	5	5	0	0	12
ENST00000556720.5|ENSG00000225746.9|OTTHUMG00000029060.4|OTTHUMT00000414506.2|SNHG23-007|SNHG23|456|	ENSMUST00000183191.1|ENSMUSG00000098061.1|OTTMUSG00000043209.1|OTTMUST00000113347.1|Gm26945-001|Gm26945|2011|	456	2011	0.0647359	0.0651626	0	0	0	0	0	0	0	0	0	0	0	0	1	1
ENST00000598163.1|ENSG00000235590.7|OTTHUMG00000060481.5|OTTHUMT00000465469.1|GNAS-AS1-004|GNAS-AS1|548|	ENSMUST00000131346.1|ENSMUSG00000074555.5|OTTMUSG00000030665.1|OTTMUST00000075914.1|Gm10714-001|Gm10714|874|	548	874	0.0645949	0.0655685	0	0	0	0	0	0	0	0	0	0	0	0	0	0
ENST00000377469.1|ENSG00000204792.2|OTTHUMG00000152932.1|OTTHUMT00000328656.1|LINC01291-001|LINC01291|3662|	ENSMUST00000204556.1|ENSMUSG00000107809.1|OTTMUSG00000057801.1|OTTMUST00000141932.1|Gm44209-001|Gm44209|4153|	3662	4153	0.0644354	0.06603	0	1	0	0	0	1	2	1	0	0	0	1	3	5
ENST00000541723.5|ENSG00000255650.5|OTTHUMG00000169261.1|OTTHUMT00000403179.1|FAM222A-AS1-001|FAM222A-AS1|871|	ENSMUST00000173208.1|ENSMUSG00000092183.1|OTTMUSG00000014589.2|OTTMUST00000034603.2|4930515G01Rik-001|4930515G01Rik|1247|	871	1247	0.0644097	0.0661044	0	0	0	0	0	0	0	2	1	2	1	0	0	6
ENST00000563931.1|ENSG00000261177.1|OTTHUMG00000176285.1|OTTHUMT00000431721.1|RP11-805I24.1-001|RP11-805I24.1|7430|	ENSMUST00000181530.7|ENSMUSG00000097336.8|OTTMUSG00000043019.2|OTTMUST00000112930.1|Fendrr-001|Fendrr|2380|	7430	2380	0.0643937	0.066151	1	0	3	3	1	0	8	0	0	2	1	0	1	4
ENST00000531730.1|ENSG00000255050.1|OTTHUMG00000165158.1|OTTHUMT00000382260.1|RP11-661A12.9-001|RP11-661A12.9|1173|	ENSMUST00000146755.1|ENSMUSG00000085523.1|OTTMUSG00000028072.1|OTTMUST00000069532.1|Gm15945-001|Gm15945|810|	1173	810	0.064392	0.0661558	1	0	1	2	0	0	4	0	0	0	0	0	0	0
ENST00000521725.1|ENSG00000253396.1|OTTHUMG00000164076.1|OTTHUMT00000377136.1|RP11-15G16.1-001|RP11-15G16.1|523|	ENSMUST00000141930.1|ENSMUSG00000086741.1|OTTMUSG00000026380.1|OTTMUST00000065233.1|Gm15816-001|Gm15816|1688|	523	1688	0.0643571	0.0662575	0	0	1	0	0	0	1	0	0	0	0	0	0	0
ENST00000597638.1|ENSG00000228363.2|OTTHUMG00000153204.3|OTTHUMT00000461992.1|AC015971.2-004|AC015971.2|818|	ENSMUST00000205011.1|ENSMUSG00000107406.1|OTTMUSG00000057948.1|OTTMUST00000142255.1|1700040L08Rik-001|1700040L08Rik|541|	818	541	0.0643453	0.0662918	0	0	0	0	0	0	0	0	0	0	0	0	0	0
ENST00000616428.1|ENSG00000274828.1|OTTHUMG00000186685.1|OTTHUMT00000473607.1|RP11-567M16.6-001|RP11-567M16.6|2072|	ENSMUST00000191632.1|ENSMUSG00000102260.1|OTTMUSG00000044920.1|OTTMUST00000118071.1|D330025C20Rik-001|D330025C20Rik|3046|	2072	3046	0.0643449	0.0662928	1	0	1	0	0	0	2	1	0	1	1	0	1	4
ENST00000431705.1|ENSG00000224424.7|OTTHUMG00000156671.2|OTTHUMT00000345242.1|PRKAR2A-AS1-003|PRKAR2A-AS1|592|	ENSMUST00000193607.1|ENSMUSG00000103754.1|OTTMUSG00000051195.1|OTTMUST00000129657.1|Gm37284-001|Gm37284|539|	592	539	0.0642932	0.0664434	0	0	0	0	0	0	0	0	0	0	0	0	0	0
ENST00000453875.5|ENSG00000228630.5|OTTHUMG00000152934.1|OTTHUMT00000328665.1|HOTAIR-004|HOTAIR|562|	ENSMUST00000188201.1|ENSMUSG00000101588.1|OTTMUSG00000048330.1|OTTMUST00000123960.1|Gm28265-001|Gm28265|2319|	562	2319	0.0642691	0.0665138	0	0	0	1	0	0	1	0	0	3	3	0	0	6
ENST00000623279.1|ENSG00000280117.1|OTTHUMG00000168553.1|OTTHUMT00000400218.1|RP11-158L12.6-001|RP11-158L12.6|4394|	ENSMUST00000199788.1|ENSMUSG00000104793.1|OTTMUSG00000055094.1|OTTMUST00000136430.1|Gm43756-001|Gm43756|2838|	4394	2838	0.0642647	0.0665267	2	0	0	1	1	3	7	0	0	0	1	0	0	1
ENST00000623837.1|ENSG00000278925.1|OTTHUMG00000162830.1|OTTHUMT00000370628.1|AC005753.1-001|AC005753.1|618|	ENSMUST00000180922.1|ENSMUSG00000097330.2|OTTMUSG00000050843.1|OTTMUST00000128826.1|Gm26672-002|Gm26672|2685|	618	2685	0.0641856	0.0667578	1	0	1	0	0	1	3	1	1	1	1	0	0	4
ENST00000564925.1|ENSG00000260278.1|OTTHUMG00000175992.1|OTTHUMT00000431354.1|RP11-109G23.3-001|RP11-109G23.3|2320|	ENSMUST00000195892.1|ENSMUSG00000105006.1|OTTMUSG00000053305.1|OTTMUST00000133137.1|Gm9484-001|Gm9484|1159|	2320	1159	0.0641774	0.066782	0	0	2	0	0	0	2	1	0	0	0	0	0	1
ENST00000592174.1|ENSG00000221857.7|OTTHUMG00000182360.1|OTTHUMT00000460765.1|CTD-2527I21.4-001|CTD-2527I21.4|728|	ENSMUST00000208688.1|ENSMUSG00000097817.2|OTTMUSG00000059311.1|OTTMUST00000145574.1|Gm26810-002|Gm26810|779|	728	779	0.064142	0.0668856	0	0	1	1	0	0	2	0	0	1	1	0	0	2
ENST00000444816.1|ENSG00000174365.19|OTTHUMG00000032449.1|OTTHUMT00000079177.1|SNHG11-002|SNHG11|621|	ENSMUST00000109506.2|ENSMUSG00000078957.3|OTTMUSG00000015926.2|OTTMUST00000037832.2|1700060C20Rik-001|1700060C20Rik|605|	621	605	0.0641291	0.0669236	0	0	0	0	0	0	0	0	0	0	0	0	0	0
ENST00000623250.1|ENSG00000279348.1|OTTHUMG00000176288.1|OTTHUMT00000431724.1|RP11-566E18.1-001|RP11-566E18.1|2116|	ENSMUST00000181382.1|ENSMUSG00000097131.1|-|-|D230017M19Rik-202|D230017M19Rik|2025|	2116	2025	0.0640689	0.0671004	0	0	0	0	0	0	0	0	0	0	0	0	0	0
ENST00000426213.1|ENSG00000223660.1|OTTHUMG00000149883.1|OTTHUMT00000313712.1|AC012314.20-001|AC012314.20|410|	ENSMUST00000204020.1|ENSMUSG00000107585.1|OTTMUSG00000057719.1|OTTMUST00000141787.1|3300002P13Rik-001|3300002P13Rik|1092|	410	1092	0.0640611	0.0671231	0	0	0	0	0	0	0	0	0	0	0	0	2	2
ENST00000567093.1|ENSG00000260417.1|OTTHUMG00000176284.1|OTTHUMT00000431720.1|CTD-2542L18.1-001|CTD-2542L18.1|3455|	ENSMUST00000181414.1|ENSMUSG00000097773.1|OTTMUSG00000043008.1|OTTMUST00000112904.1|Gm10614-001|Gm10614|2538|	3455	2538	0.0640127	0.0672656	1	0	1	1	1	1	5	0	0	2	2	1	0	5
ENST00000576784.1|ENSG00000262831.1|OTTHUMG00000177880.1|OTTHUMT00000439446.1|RP11-498C9.2-001|RP11-498C9.2|529|	ENSMUST00000193520.1|ENSMUSG00000102881.1|OTTMUSG00000042857.2|OTTMUST00000112638.2|Gm3807-001|Gm3807|1168|	529	1168	0.0639536	0.0674399	0	0	1	0	0	0	1	0	0	0	1	0	0	1
ENST00000567122.1|ENSG00000261396.1|OTTHUMG00000172863.1|OTTHUMT00000420959.1|CTD-2012K14.2-001|CTD-2012K14.2|530|	ENSMUST00000182863.1|ENSMUSG00000098120.1|OTTMUSG00000043506.1|OTTMUST00000114098.1|Gm5914-001|Gm5914|375|	530	375	0.0639087	0.0675724	0	0	2	2	0	0	4	0	0	1	0	0	0	1
ENST00000562838.1|ENSG00000260778.4|OTTHUMG00000177116.1|OTTHUMT00000435438.1|MIR940-001|MIR940|535|	ENSMUST00000180579.1|ENSMUSG00000073437.10|OTTMUSG00000042676.1|OTTMUST00000112389.1|D330041H03Rik-006|D330041H03Rik|605|	535	605	0.0638846	0.0676437	0	1	0	0	0	0	1	0	0	0	0	0	0	0
ENST00000498304.5|ENSG00000282057.1|OTTHUMG00000010578.5|OTTHUMT00000029196.1|RP4-621F18.2-001|RP4-621F18.2|508|	ENSMUST00000197148.1|ENSMUSG00000097183.2|OTTMUSG00000055192.1|OTTMUST00000136697.1|Gm17501-002|Gm17501|810|	508	810	0.0638398	0.0677765	0	0	0	1	0	0	1	0	0	0	0	0	0	0
ENST00000500163.2|ENSG00000245148.2|OTTHUMG00000167951.1|OTTHUMT00000397234.1|ARAP1-AS2-001|ARAP1-AS2|1824|	ENSMUST00000210076.1|ENSMUSG00000109656.1|OTTMUSG00000060182.1|OTTMUST00000147295.1|RP24-126J17.5-001|RP24-126J17.5|3167|	1824	3167	0.0638292	0.0678079	0	0	0	0	0	0	0	0	0	1	1	0	0	2
ENST00000625071.1|ENSG00000278946.1|OTTHUMG00000189137.1|OTTHUMT00000478932.1|AC005609.20-001|AC005609.20|447|	ENSMUST00000193015.1|ENSMUSG00000103985.1|OTTMUSG00000050734.1|OTTMUST00000128593.1|Gm37446-001|Gm37446|4136|	447	4136	0.0637834	0.0679437	0	0	0	0	0	0	0	1	0	0	0	0	3	4
ENST00000559112.2|ENSG00000259663.2|OTTHUMG00000171880.2|OTTHUMT00000415591.2|CTD-2314G24.2-001|CTD-2314G24.2|2367|	ENSMUST00000195602.1|ENSMUSG00000102306.1|OTTMUSG00000042977.1|OTTMUST00000112824.1|Gm38193-001|Gm38193|2940|	2367	2940	0.0637414	0.0680684	1	0	1	1	0	0	3	2	0	1	0	1	2	6
ENST00000424705.1|ENSG00000269549.2|OTTHUMG00000032593.3|OTTHUMT00000079474.2|RP3-461P17.10-001|RP3-461P17.10|514|	ENSMUST00000151754.1|ENSMUSG00000086179.1|OTTMUSG00000016294.1|OTTMUST00000039134.1|Gm14317-001|Gm14317|1464|	514	1464	0.0637314	0.0680981	0	0	0	0	0	0	0	1	0	2	1	1	0	5
ENST00000520902.1|ENSG00000254081.1|OTTHUMG00000164373.1|OTTHUMT00000378479.1|LINC01299-001|LINC01299|2634|	ENSMUST00000193065.1|ENSMUSG00000103135.1|OTTMUSG00000051207.1|OTTMUST00000129688.1|Gm37979-001|Gm37979|712|	2634	712	0.0637143	0.068149	0	0	0	0	1	1	2	1	2	0	0	0	2	5
ENST00000586209.1|ENSG00000267302.5|OTTHUMG00000179978.1|OTTHUMT00000449162.1|RP11-178C3.2-001|RP11-178C3.2|1603|	ENSMUST00000151652.7|ENSMUSG00000086199.7|OTTMUSG00000001037.1|OTTMUST00000002075.1|Bcas3os1-002|Bcas3os1|3138|	1603	3138	0.0636872	0.0682299	1	0	0	0	0	0	1	0	0	1	0	0	0	1
ENST00000417927.1|ENSG00000227145.1|OTTHUMG00000150127.1|OTTHUMT00000316451.1|IL21-AS1-001|IL21-AS1|3748|	ENSMUST00000198874.1|ENSMUSG00000105063.1|OTTMUSG00000052795.1|OTTMUST00000132149.1|Gm43488-001|Gm43488|2504|	3748	2504	0.0636574	0.0683186	0	0	0	0	0	1	1	1	0	0	0	0	1	2
ENST00000604228.1|ENSG00000270760.1|OTTHUMG00000184249.1|OTTHUMT00000468471.1|AD001527.7-001|AD001527.7|379|	ENSMUST00000180820.7|ENSMUSG00000097320.8|OTTMUSG00000043103.1|OTTMUST00000113130.1|Tmem147os-001|Tmem147os|1276|	379	1276	0.0636505	0.0683392	0	0	0	0	0	1	1	0	0	0	1	0	0	1
ENST00000499504.7|ENSG00000246523.7|OTTHUMG00000167232.2|OTTHUMT00000393819.2|RP11-736K20.6-002|RP11-736K20.6|1223|	ENSMUST00000208963.1|ENSMUSG00000109576.1|OTTMUSG00000059639.1|OTTMUST00000146236.1|Gm44704-001|Gm44704|1990|	1223	1990	0.0636349	0.0683858	1	0	0	0	0	0	1	0	0	0	0	0	2	2
ENST00000435738.1|ENSG00000226115.1|OTTHUMG00000090439.1|OTTHUMT00000206876.1|AP001476.3-001|AP001476.3|355|	ENSMUST00000127576.2|ENSMUSG00000086241.2|OTTMUSG00000027873.1|OTTMUST00000069016.1|4930483K19Rik-001|4930483K19Rik|1237|	355	1237	0.0636306	0.0683985	0	0	1	0	0	0	1	0	0	0	1	0	0	1
ENST00000622210.1|ENSG00000274312.1|OTTHUMG00000187037.1|OTTHUMT00000474305.1|RP11-167B3.2-001|RP11-167B3.2|551|	ENSMUST00000207818.1|ENSMUSG00000108924.1|OTTMUSG00000059614.1|OTTMUST00000146182.1|4933436H12Rik-001|4933436H12Rik|1466|	551	1466	0.063557	0.0686184	0	0	0	0	0	0	0	0	0	1	0	0	1	2
ENST00000550636.1|ENSG00000258135.5|OTTHUMG00000169809.2|OTTHUMT00000405992.1|RP11-70F11.11-001|RP11-70F11.11|2324|	ENSMUST00000161529.1|ENSMUSG00000089671.1|OTTMUSG00000034996.1|OTTMUST00000088995.1|Gm16537-001|Gm16537|702|	2324	702	0.0635207	0.0687274	0	0	1	1	0	1	3	0	0	1	1	0	0	2
ENST00000576032.1|ENSG00000262313.1|OTTHUMG00000177643.1|OTTHUMT00000438211.1|CTD-2561B21.4-001|CTD-2561B21.4|494|	ENSMUST00000139014.1|ENSMUSG00000043993.6|OTTMUSG00000004130.2|OTTMUST00000009324.2|2900052L18Rik-001|2900052L18Rik|1588|	494	1588	0.0635104	0.0687582	0	0	0	0	0	0	0	0	0	1	1	0	0	2
ENST00000594203.5|ENSG00000168367.9|OTTHUMG00000183867.1|OTTHUMT00000467202.1|LINC00917-002|LINC00917|2678|	ENSMUST00000180796.1|ENSMUSG00000097097.1|OTTMUSG00000043025.1|OTTMUST00000112937.1|5033426O07Rik-001|5033426O07Rik|2066|	2678	2066	0.0634774	0.0688572	0	1	0	0	0	0	1	0	0	1	0	1	1	3
ENST00000542620.1|ENSG00000255946.1|OTTHUMG00000169204.1|OTTHUMT00000402864.1|RP11-173P15.7-001|RP11-173P15.7|583|	ENSMUST00000129609.1|ENSMUSG00000086054.2|OTTMUSG00000014613.2|OTTMUST00000034669.1|Hnf1aos1-003|Hnf1aos1|516|	583	516	0.0634758	0.068862	0	0	0	0	0	0	0	0	0	1	1	1	1	4
ENST00000625474.1|ENSG00000281453.1|OTTHUMG00000189749.1|OTTHUMT00000481666.1|TGFB2-OT1-001|TGFB2-OT1|1371|	ENSMUST00000194722.1|ENSMUSG00000102619.1|OTTMUSG00000050849.1|OTTMUST00000128833.1|Gm37849-001|Gm37849|1881|	1371	1881	0.0634385	0.0689738	1	0	0	0	0	1	2	1	0	0	0	0	1	2
ENST00000524412.1|ENSG00000270060.1|OTTHUMG00000183948.1|OTTHUMT00000467565.1|RP11-390K5.6-001|RP11-390K5.6|574|	ENSMUST00000181191.1|ENSMUSG00000097868.1|-|-|A330069E16Rik-201|A330069E16Rik|887|	574	887	0.063423	0.0690206	1	0	0	0	0	1	2	0	0	0	0	0	0	0
ENST00000418839.2|ENSG00000223387.6|OTTHUMG00000156985.3|OTTHUMT00000346975.2|RP11-408H1.3-001|RP11-408H1.3|3212|	ENSMUST00000181124.1|ENSMUSG00000097584.1|OTTMUSG00000052405.1|OTTMUST00000131455.1|1700125G22Rik-001|1700125G22Rik|861|	3212	861	0.0634002	0.0690892	0	0	3	4	0	0	7	0	0	1	1	1	0	3
ENST00000623570.1|ENSG00000279987.1|OTTHUMG00000189176.1|OTTHUMT00000478998.1|AC008103.4-001|AC008103.4|1181|	ENSMUST00000181077.1|ENSMUSG00000097764.1|-|-|Gm26635-201|Gm26635|3199|	1181	3199	0.0633847	0.0691357	0	0	0	0	1	0	1	0	0	3	1	1	0	5
ENST00000495536.1|ENSG00000242407.1|OTTHUMG00000159903.1|OTTHUMT00000358091.1|CTD-2377D24.4-001|CTD-2377D24.4|532|	ENSMUST00000194862.1|ENSMUSG00000103376.1|OTTMUSG00000045502.1|OTTMUST00000119323.1|Gm37179-001|Gm37179|823|	532	823	0.0633588	0.0692139	1	0	1	0	1	1	4	1	0	2	2	0	0	5
ENST00000623320.1|ENSG00000278907.1|OTTHUMG00000189136.1|OTTHUMT00000478931.1|AC005609.19-001|AC005609.19|592|	ENSMUST00000193015.1|ENSMUSG00000103985.1|OTTMUSG00000050734.1|OTTMUST00000128593.1|Gm37446-001|Gm37446|4136|	592	4136	0.0633427	0.0692624	0	0	0	0	0	0	0	1	0	0	0	0	3	4
ENST00000623117.1|ENSG00000277232.2|OTTHUMG00000189497.1|OTTHUMT00000479798.1|GTSE1-AS1-001|GTSE1-AS1|1518|	ENSMUST00000159271.1|ENSMUSG00000089680.1|OTTMUSG00000025709.1|OTTMUST00000063317.1|Gm15722-001|Gm15722|661|	1518	661	0.0633164	0.0693417	0	0	1	0	0	0	1	0	0	1	1	0	0	2
ENST00000416742.5|ENSG00000235621.8|OTTHUMG00000032682.1|OTTHUMT00000079620.1|LINC00494-004|LINC00494|3544|	ENSMUST00000127920.1|ENSMUSG00000085129.1|OTTMUSG00000016142.1|OTTMUST00000038614.1|5031425F14Rik-001|5031425F14Rik|2098|	3544	2098	0.0632819	0.0694457	0	0	1	1	0	0	2	0	0	0	3	0	0	3
ENST00000494885.1|ENSG00000243176.5|OTTHUMG00000158749.1|OTTHUMT00000352023.1|RP11-550I24.2-001|RP11-550I24.2|517|	ENSMUST00000195714.1|ENSMUSG00000103041.1|OTTMUSG00000051782.2|OTTMUST00000130502.2|Gm37305-001|Gm37305|4279|	517	4279	0.0632754	0.0694654	0	0	0	0	0	1	1	2	0	2	1	0	1	6
ENST00000542265.5|ENSG00000255857.5|OTTHUMG00000169166.1|OTTHUMT00000402647.1|PXN-AS1-001|PXN-AS1|854|	ENSMUST00000202251.1|ENSMUSG00000107353.1|OTTMUSG00000056073.1|-|4930430O22Rik-201|4930430O22Rik|539|	854	539	0.0632281	0.0696085	1	0	0	0	0	0	1	0	0	1	1	0	0	2
ENST00000567102.1|ENSG00000260296.1|OTTHUMG00000176303.1|OTTHUMT00000431740.1|RP11-395I6.3-001|RP11-395I6.3|1157|	ENSMUST00000201872.1|ENSMUSG00000106681.1|OTTMUSG00000055240.1|OTTMUST00000136802.1|Gm43004-001|Gm43004|703|	1157	703	0.0632113	0.0696595	1	0	0	0	0	0	1	0	0	1	0	0	0	1
ENST00000596350.1|ENSG00000268231.1|OTTHUMG00000183148.1|OTTHUMT00000465239.1|CTD-2560K21.6-001|CTD-2560K21.6|813|	ENSMUST00000206342.1|ENSMUSG00000108322.1|OTTMUSG00000058747.1|OTTMUST00000144293.1|Gm45123-001|Gm45123|795|	813	795	0.0632071	0.0696721	0	0	1	1	0	1	3	0	0	0	0	0	1	1
[truncated: 5,934 more rows]

## Sheet: HMZ-lncRNAs
human_full_ID	mouse_full_ID	human_tlen	mouse_tlen	human_vs_mouse_rval	human_vs_mouse_pval	human_vs_rA_chunkcount	human_vs_rF_chunkcount	human_vs_rB1_chunkcount	human_vs_rB2_chunkcount	human_vs_rD_chunkcount	human_vs_rE_chunkcount	human_vs_XIST_total_chunkcount	mouse_vs_rA_chunkcount	mouse_vs_rF_chunkcount	mouse_vs_rB1_chunkcount	mouse_vs_rB2_chunkcount	mouse_vs_rD_chunkcount	mouse_vs_rE_chunkcount	mouse_vs_XIST_total_chunkcount
[truncated: 570 more rows]
